# Supplementary material for: Essential Genes in the Core Genome of the Human Pathogen Streptococcus pyogenes
Source: PubMed Central journal article supplement (PMC4440532; doi:10.1038/srep09838), 2015-05-21
Supplement: srep09838-s1.pdf [file srep09838-s1.pdf]

Supplemental Materials for:

**Essential Genes in the Core Genome  
of the Human Pathogen *Streptococcus pyogenes***

Yoann Le Breton<sup>1</sup>, Ashton T. Belew<sup>1</sup>, Kayla M. Valdes<sup>1</sup>, Emrul Islam<sup>1</sup>, Patrick Curry<sup>1</sup>, Hervé Tettelin<sup>3,4</sup>, Mark. E. Shirtliff<sup>4,5</sup>, Najib M. El-Sayed<sup>1,2</sup>, and Kevin S. McIver<sup>1</sup>

<sup>a</sup>Department of Cell Biology & Molecular Genetics and Maryland Pathogen Research Institute,

<sup>b</sup>Center for Bioinformatics and Computation Biology, University of Maryland, College Park, MD

20742; <sup>3</sup>Institute for Genome Sciences, <sup>4</sup>Department of Microbiology & Immunology,

<sup>5</sup>Department of Microbial Pathogenesis, School of Dentistry, University of Maryland School of

Medicine, Baltimore, MD USA

## **Supplemental Materials Contents:**

**Supplemental Methods.** Methodology of all computation analyses performed in the manuscript, including scripts used, genome alignments, library matrices and statistical analyses.

**Supplemental Figures.** Following four (4) figures are included:

- Figure S1.** pKRMIT, a Tn-seq compatible *in vivo mariner* transposition system for GAS.
- Figure S2.** Additional statistical analyses for pairwise comparisons of the initial libraries produced in GAS 5448.
- Figure S3.** The GAS core genome.
- Figure S4.** Conserved essential genes within the GAS core genome.

**Supplemental Tables.** Following ten (10) tables are included:

- Table S1.** Complete analysis of Tn-seq read counts and alignments.
- Table S2.** Selection of reads for the Bayesian analysis.
- Table S3.** Bayesian analysis of Tn-seq datasets for GAS MIT1 5448 grown *in vitro*.
- Table S4.** Integrated gene essentiality determination for GAS MIT1 5448 for all time points.
- Table S5.** Bayesian analysis of Tn-seq datasets for GAS M49 NZ131 grown *in vitro*.
- Table S6.** Integrated gene essentiality determination for GAS M49 NZ131 for all time points.
- Table S7.** Conserved GAS essential genes identified in both MIT1 5448 and M49 NZ131 compared to the predicted GAS core genome.
- Table S8.** Bacterial strains and plasmids.
- Table S9.** Primers used in this study.
- Table S10.** Summary of 10 publically available GAS genomes.

## Supplemental Methods

### Scripts used

Italicized directory names (ending in /) refer to directories within the git repository for this project, italicized scripts are provided in the *scripts/* directory, and italicized data files reside in the *data/* directory. The git repository may be downloaded by visiting [https://gitlab.umiacs.umd.edu/abelew/tnseq\\_gas](https://gitlab.umiacs.umd.edu/abelew/tnseq_gas) or with the command:

```
git clone https://gitlab.umiacs.umd.edu/abelew/tnseq_gas.git .
```

### Annotation Collection.

GenBank genomes including annotation information were downloaded for each of the GAS strains used in this study: CP000017 is the reference MGAS 5005 genome <sup>1</sup> used for MGAS 5448 alignments as it is the most similar annotated genome available; NC\_011375 is the reference genome for NZ131 <sup>2</sup>. A genbank file for the plasmid was also parsed (*reference/genbank/pOSKAR.gb*) and used to define how many reads did not integrate into the genome properly. For each of the genbank annotations collected, the perl script *gb2gff.pl* was used to split the genbank file into the following: a nucleotide fasta file containing a single genomic sequence, a nucleotide multi-fasta of all annotated coding sequences, a peptide multi-fasta of annotated coding sequences, a gff file of all annotations, a gff file of only the coding sequence annotations, and a gff file describing the inter-cds regions. These may be found in *reference/genbank/*. The resulting fasta and gff files were used as the reference for most of the operations that follow; conversely, gene ontology information was downloaded from [microbesonline.org](http://microbesonline.org) for strains 5448

and NZ131 and cross referenced against these annotations when necessary. Copies are located in *reference/microbesonline/*.

### **Genome Alignments.**

The reads generated from Tn-seq data produced in GAS 5448 and NZ131 were queried for quality with FastQC <sup>3</sup> before demultiplexing against the local indexing adapters with Bio::SeqIO <sup>4</sup> and again queried for quality. The *mariner* ITR leading sequences were removed with a combination of Biopieces (biopieces.org), Cutadapt <sup>5</sup>, and Trimmomatic <sup>6</sup>, reads lacking the ITR sequence were discarded. This process left libraries of approximately 15,000,000 reads (**Table S1**) of lengths primarily  $12 \leq x \leq 15$  nucleotides. In the cases where a large number of reads did not align to the genome, the primary culprit was invariably the plasmid (**Table S1**).

These libraries were aligned against the appropriate GAS genomes with Bowtie <sup>7,8</sup> using options to limit the seed sequence to 10 nucleotides (-l 10), with no mismatch (-v 0), and randomly assign multi-matched reads to one of the possible matching positions (-M 1); these are summarized in **Table S1**. This was later repeated with 1 mismatch. The resulting alignments were converted to sorted/compressed binary alignments using SAMtools <sup>9</sup> and counted <sup>10</sup> against the reference genome CDS and intergenic regions. These operations were performed with the *process\_reads.sh* script. The resulting count tables are in *data/count\_tables/*; organized by strain, library, and time point; they are referenced in *all\_samples.csv* for all operations in R. When R functions are noted, they are italicized and have following parentheses. These functions will be found in *R/myr.R* or rarely in *tnseq.rmd*. All operations performed in R are recorded in *tnseq.rmd*

(`tnseqv0.rmd` for no-mismatches, and `tnseqv1.rmd` for 1 mismatch analyses) and knitr (<http://yihui.name/knitr/>) was used to generate *tnseq.pdf* which provides a (longer than anyone will ever read) report of the operations performed.

## **Library Metrics**

Before using the libraries to quantify the essentiality/fitness of coding sequences in the genome, it was necessary to compare and contrast the libraries and quantify their relative coverage, similarity, and saturation with respect to available TA insertion points. These comparisons in turn require some attention to the normalization strategies employed.

***Library Saturation by TA insertion points.*** The GAS genome is AT rich, providing a relatively large number of possible *mariner* insertion points: there are 1,838,562 and 1,815,783 TA sites found on the genome of MGAS5005 and NZ131, respectively. Therefore, the bam alignments were read into *tnseq\_count\_hitsv2.pl* along with the fasta genome; this script created a simple array of the genome and filled in the number of observed reads, which started (forward strand) or ended (reverse strand) at every TA in the genome. The bowtie parameters used allowed no mismatch, therefore this script excluded any read which did not match exactly the TA insertion point. The resulting text files contain one line for each TA of the genome, include a column for the position of each TA, the number of observed reads on the forward strand, reverse strand, and missed reads. These may be found in *data/count\_tas/*; there is one file for the concatenated 5448 libraries as well as each separate library for all strains, in each case the file ends in '*tas\_only.txt*'. Some reads were observed (again due to bowtie mismatches)

to hit near but not on the TA insertion points. These were also collected in the *tnseqcount.out* files, but were discarded. These same outputs were used to feed the essentiality package <sup>11</sup>.

These files were read into the R function *plot\_saturation()* and used to visualize the lifespan of each library over time. This was done by taking the  $\log_2(\text{hits} + 1)$  for each position and plotting them as a set of histograms.

***Normalization and visualization strategies.*** The most expedient method of comparing the libraries was to treat them as if they were components of an RNA sequencing experiment and assuming similar normalization strategies <sup>12</sup> apply. This strategy is very similar to that taken by the essentials software package <sup>13</sup>, but uses voom/limma instead of EdgeR. Therefore the alignments were counted by reference genome coding sequence and quantile normalized without removing the low-count genes. These normalized counts were adjusted by the size of the library and length of each coding sequence (rpkm implemented in edgeR <sup>14</sup> with assistance from DESeq <sup>15</sup> and  $\log_2$  transformed. Conversely, the quantile normalized counts were adjusted by library size (cpm), then adjusted by the ratio of TAs observed in the coding sequence divided by the median number of TAs in all coding sequences (all normalizations were performed by *my\_norm* and *divide\_seq*). The resulting data sets were used to quantify the median coverage of the genome. Pairwise Euclidean distances (Fig. S2B), Spearman correlation coefficients (Fig. 1G, H, I) and principle component analyses (Fig. S2A) were then used to visualize the similarities/differences between normalized libraries.

***Pairwise sample comparisons.*** In order to further explore the similarities and difference between the libraries, they were plotted against one another as a series of

scatter plots (generated by *my\_linear\_scatter*) and histograms. These provided a visual metric of the similarities and differences among the libraries and time points between libraries. In the case of the 5448 strain, *voom*<sup>16</sup> and *limma*<sup>17</sup> were used to combine the samples, correct for the batch effect among libraries, and calculate the merged changes between time points (performed by *simple\_comparison*), and include significance with respect to the variance in the data.

**Essentiality.** The essentiality software package<sup>11</sup> provides an opportunity to query statistically significant stretches of TAs which have no observed insertions to further inform its metric of essentiality. The insertion data was therefore converted into its expected format (*tnseq\_count\_hitsv2.pl*) and passed to the version 1.21 of the implementation python script. The resulting table provided a count of the number of insertions observed in each ORF, the number of observed TAs, the maximum length of non-observed sequence, the nucleotide span of this region, a call on whether each ORF is essential, and the posterior probability for each call. A few different parameters were tested with each strain and settled on a minimum hit parameter of 2 for both strains.

**Circos.** R was used to massage various data structures into the format expected by *circos*<sup>18</sup>.

## SUPPLEMENTAL REFERENCES

- 1 Sumbly, P. *et al.* Evolutionary origin and emergence of a highly successful clone of serotype M1 group A streptococcus involved multiple horizontal gene transfer events. *J. Infect. Dis.* **192**, 771-782 (2005).
- 2 McShan, W. M. *et al.* Genome sequence of a nephritogenic and highly transformable M49 strain of *Streptococcus pyogenes*. *J. Bacteriol.* **190**, 7773-7785, doi:10.1128/JB.00672-08 (2008).

- 3 Patel, R. K. & Jain, M. NGS QC Toolkit: A Toolkit for Quality Control of Next  
Generation Sequencing Data. *PloS One* **7**, e30619 (2012).
- 4 Stajich, J. E. *et al.* The Bioperl toolkit: Perl modules for the life sciences. *Genome Res.*  
**12**, 1611-1618 (2002).
- 5 Martin, M. Cutadapt removes adapter sequences from high-throughput sequencing reads.  
*EMBnet J* (2011).
- 6 Bolger, A. M., Lohse, M. & Usadel, B. Trimmomatic: a flexible trimmer for Illumina  
sequence data. *Bioinformatics* **30**, 2114-2120 (2014).
- 7 Langmead, B. Aligning short sequencing reads with Bowtie. *Current Protocols in*  
*Bioinformatics* **11** (2010).
- 8 Langmead, B., Trapnell, C., Pop, M. & Salzberg, S. L. Ultrafast and memory-efficient  
alignment of short DNA sequences to the human genome. *Genome Biology* **10**, R25  
(2009).
- 9 Li, H. *et al.* The Sequence Alignment/Map format and SAMtools. *Bioinformatics* **25**,  
2078-2079 (2009).
- 10 Anders, S. & Huber, W. Differential expression analysis for sequence count data.  
*Genome Biology* **11**, R106 (2010).
- 11 DeJesus, M. A. *et al.* Bayesian analysis of gene essentiality based on sequencing of  
transposon insertion libraries. *Bioinformatics* **29**, 695-703 (2013).
- 12 Dillies, M. A. *et al.* A comprehensive evaluation of normalization methods for Illumina  
high-throughput RNA sequencing data analysis. *Briefings in Bioinformatics* **14**, 671-683,  
doi:10.1093/bib/bbs046 (2013).
- 13 Zomer, A., Burghout, P., Bootsma, H. J., Hermans, P. W. & van Hijum, S. A.  
ESSENTIALS: software for rapid analysis of high throughput transposon insertion  
sequencing data. *PloS One* **7**, e43012, doi:10.1371/journal.pone.0043012 (2012).
- 14 McCarthy, D. J., Chen, Y. & Smyth, G. K. Differential expression analysis of multifactor  
RNA-Seq experiments with respect to biological variation. *Nucleic Acids Res.* **40**, 4288-  
4297, doi:10.1093/nar/gks042 (2012).
- 15 Love, M. I., Huber, W. & Anders, S. Moderated estimation of fold change and dispersion  
for RNA-Seq data with DESeq2. *bioRxiv*, doi:doi:10.1101/002832 (2014).
- 16 Law, C. W., Chen, Y., Shi, W. & Smyth, G. K. voom: Precision weights unlock linear  
model analysis tools for RNA-seq read counts. *Genome Biology* **15**, R29, doi:10.1186/gb-  
2014-15-2-r29 (2014).



- 17 Qin, H., Feng, T., Harding, S. A., Tsai, C. J. & Zhang, S. An efficient method to identify differentially expressed genes in microarray experiments. *Bioinformatics* **24**, 1583-1589, doi:10.1093/bioinformatics/btn215 (2008).
- 18 Krzywinski, M. *et al.* Circos: an information aesthetic for comparative genomics. *Genome Res.* **19**, 1639-1645, doi:10.1101/gr.092759.109 (2009).

## Supplemental Figures

**Supplemental Figure S1. pKRMIT, a Tn-seq compatible *in vivo mariner* transposition system for GAS.** The *Krmit mariner* transposable element (A) contains a Kanamycin-resistance ( $Km^r$ ) cassette surrounded by inverse terminal repeats (ITR) targeted by the *Himar1 mariner* transposase. *MmeI* restriction sites were introduced in the ITR for Tn-seq insertion tag production as indicated. Promoter elements and RBS are also shown. (B) The pKRMIT *E. coli*/GAS shuttle vector possesses a hyperactive allele of the *Himar1 mariner* transposase (*tnpC9*) driven from the *L. lactis* P<sub>23</sub> promoter, a ColE1 origin of replication functional in *E. coli*, a pWV01-derived thermosensitive origin of replication (*oriRts*) functional in GAS, and a spectinomycin resistance element ( $Sp^R$ ). (C) Web logo consensus analysis of *Krmit* transposon insertion sites (TIS) in 120 independent transposants produced in GAS 5448. Nucleotide sequences at the site of *Krmit* insertion are displayed along the horizontal axis. Positions 31 and 32 correspond to the “TA” dinucleotide targeted by *Krmit*. The height and order of each letter in the stack of letters at each position correspond to the relative frequency of the nucleotides at that position.

**Supplemental Figure S2. Additional statistical analyses for pairwise comparisons of the initial libraries produced in GAS 5448.** Libraries 1 to 4 are presented by their original names in the study (Library 9, 11, 12 and 34, respectively) and compared using two additional methods. (A) Principal Component Analysis (PCA) was performed and

the results are presented graphically with PC1 (x axis) and PC2 (y axis). Libraries are color coded based on time points as follows; T<sub>0</sub> (yellow), T<sub>1</sub> (green), T<sub>2</sub> (red), and T<sub>3</sub> (blue). (B) Euclidean Distance statistical analysis is presented as a heat map.

**Supplemental Figure S3. The GAS core genome.** Artemis ACT [83](#) graphical representation of the whole genome multiple sequence alignment of 20 publicly available GAS strains using core clusters of syntenic orthologs (pink lines) as the linking information. Genome order from top to bottom: MGAS5005, NZ131, SF370, MGAS8232, MGAS315, MGAS10394, MGAS6180, MGAS9429, MGAS10270, MGAS2096, MGAS10750. MGAS15252, MGAS1882, Alab49, A20, M1-476, HSC5, HKU, Manfredo and SSI-1.

**Supplemental Figure S4. Conserved essential genes within the GAS core genome.** Artemis ACT [83](#) graphical representation of the whole genome multiple sequence alignment of 20 publicly available GAS strains using clusters of essential syntenic orthologs (red lines) as the linking information. Genome order from top to bottom: MGAS5005, NZ131, SF370, MGAS8232, MGAS315, MGAS10394, MGAS6180, MGAS9429, MGAS10270, MGAS2096, MGAS10750. MGAS15252, MGAS1882, Alab49, A20, M1-476, HSC5, HKU, Manfredo and SSI-1.

Figure S1

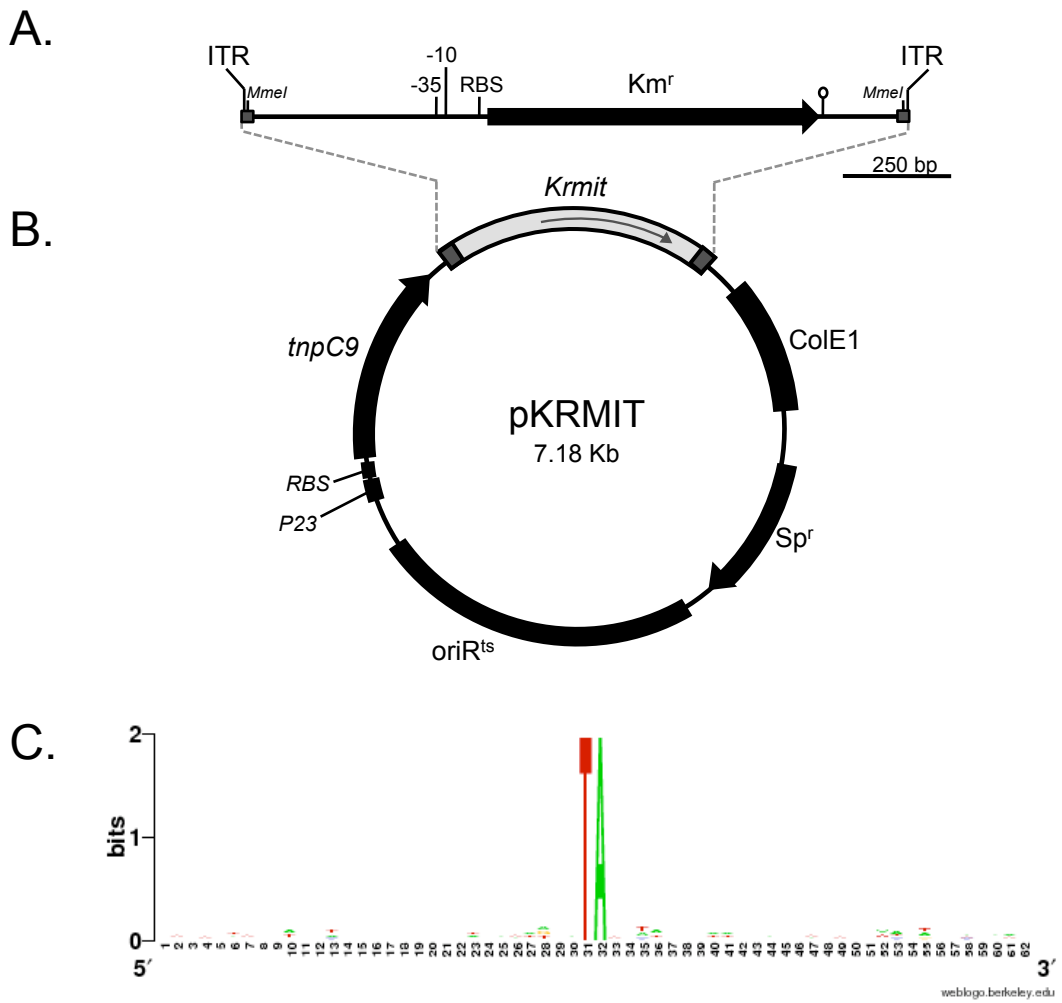



Figure S3

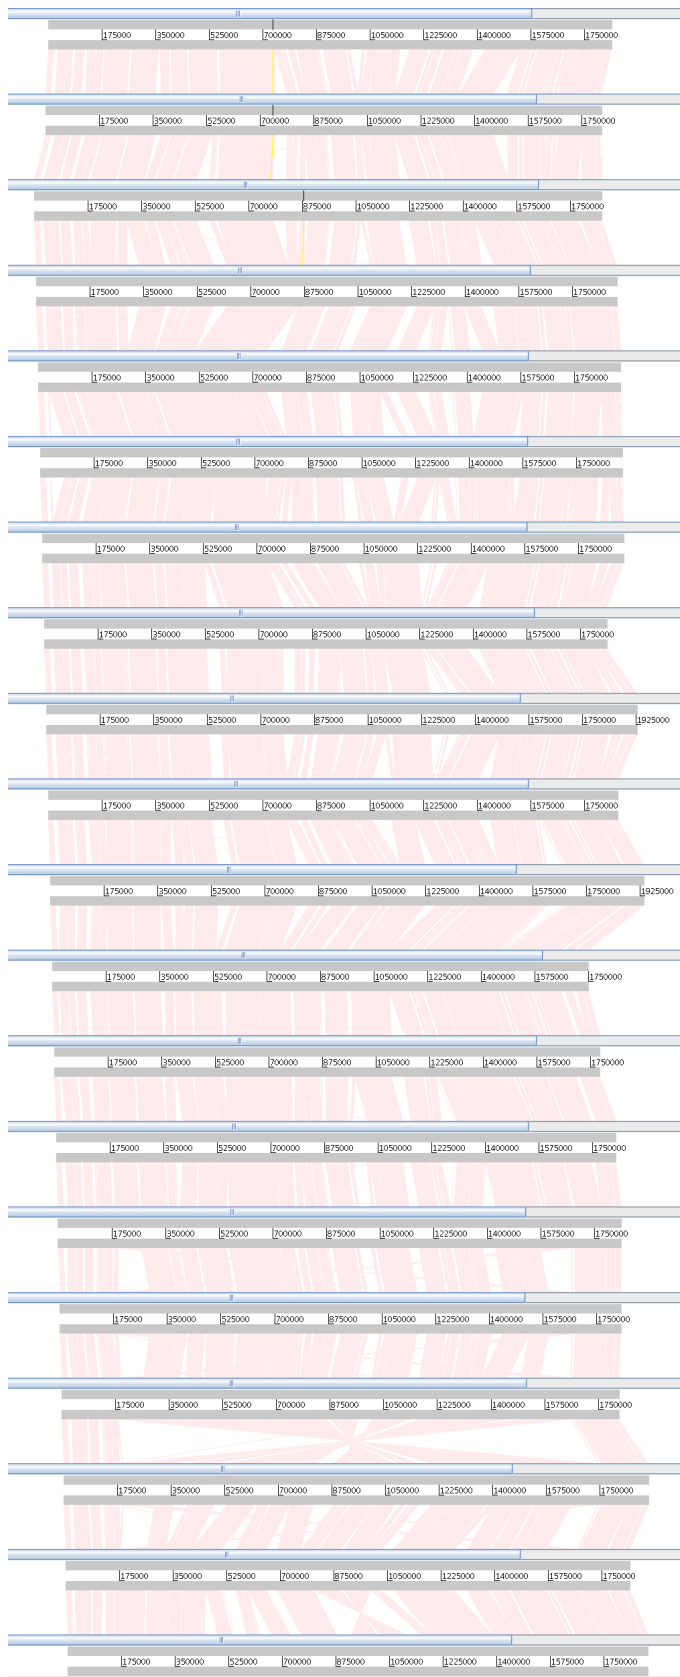

Figure S4

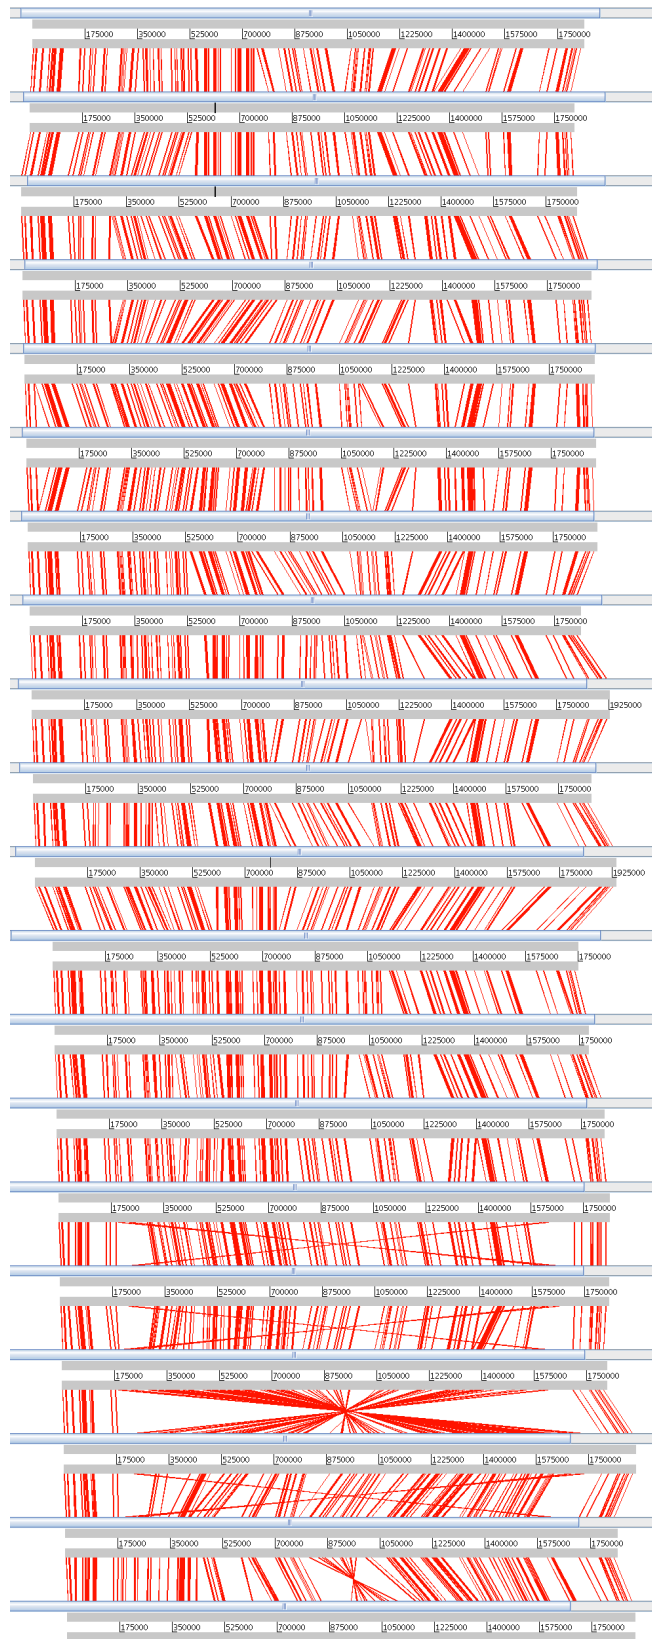

## Supplemental Tables

Following nine (9) tables are presented:

- Table S1.** Complete analysis of Tn-seq read counts and alignments.
- Table S2.** Selection of reads for the Bayesian analysis.
- Table S3.** Bayesian analysis of Tn-seq datasets for GAS MIT1 5448 grown *in vitro*.
- Table S4.** Integrated gene essentiality determination for GAS MIT1 5448 for all time points.
- Table S5.** Bayesian analysis of Tn-seq datasets for GAS M49 NZ131 grown *in vitro*.
- Table S6.** Integrated gene essentiality determination for GAS M49 NZ131 for all time points.
- Table S7.** Conserved GAS essential genes identified in both MIT1 5448 and M49 NZ131 compared to the predicted GAS core genome.
- Table S8.** Bacterial strains and plasmids.
- Table S9.** Primers used in this study.
- Table S10.** Summary of the 20 publically available GAS genome sequences.



**Table S1. Complete analysis of Tn-seq read counts and alignments.**

| Sample(a)      | Total reads | Strict aligned | Randomly placed(b) | Total aligned (%) (c) | Failed     | Plasmid hits (%) (d) | Unique insert sites (TIS) | Saturation index(e) | Av. Distance (f) |
|----------------|-------------|----------------|--------------------|-----------------------|------------|----------------------|---------------------------|---------------------|------------------|
| 5448 Lb1 T0    | 12,326,943  | 3,366,045      | 127,359            | 3,493,404 (28%)       | 8,833,539  | 8,597,058 (97%)      | 54,757                    | 41                  | 34               |
| 5448 Lb1 T1    | 15,691,922  | 13,870,884     | 499,569            | 14,370,453 (92%)      | 1,321,469  | 631,064 (48%)        | 90,292                    | 68                  | 20               |
| 5448 Lb1 T2    | 14,173,628  | 11,449,398     | 1,338,258          | 12,787,656 (90%)      | 1,385,972  | 871,696 (63%)        | 72,114                    | 54                  | 25               |
| 5448 Lb1 T3    | 12,692,504  | 11,471,765     | 632,320            | 12,104,085 (95%)      | 588,419    | 239,739 (41%)        | 20,132                    | 15                  | 91               |
| 5448 Lb2 T0    | 14,893,811  | 10,081,697     | 238,856            | 10,320,553 (69%)      | 4,573,258  | 4,101,079 (90%)      | 28,705                    | 22                  | 64               |
| 5448 Lb2 T1    | 12,603,471  | 11,272,221     | 267,163            | 11,539,384 (92%)      | 1,064,087  | 687,446 (65%)        | 24,123                    | 18                  | 76               |
| 5448 Lb2 T2    | 10,583,515  | 9,904,226      | 198,478            | 10,102,704 (95%)      | 480,811    | 152,719 (32%)        | 22,297                    | 17                  | 82               |
| 5448 Lb2 T3    | 15,500,886  | 13,903,253     | 598,603            | 14,501,856 (94%)      | 999,030    | 437,253 (44%)        | 33,710                    | 25                  | 55               |
| 5448 Lb3 T0    | 13,394,016  | 9,867,412      | 1,192,267          | 11,059,679 (83%)      | 2,334,337  | 2,037,516 (87%)      | 23,428                    | 18                  | 78               |
| 5448 Lb3 T1    | 15,131,244  | 13,023,394     | 1,053,742          | 14,077,136 (93%)      | 1,054,108  | 551,455 (52%)        | 32,406                    | 24                  | 57               |
| 5448 Lb3 T2    | 13,337,250  | 11,576,167     | 1,101,352          | 12,677,519 (95%)      | 659,731    | 402,269 (61%)        | 24,694                    | 19                  | 74               |
| 5448 Lb3 T3    | 17,623,505  | 13,938,708     | 3,080,613          | 17,019,321 (97%)      | 604,184    | 64,548 (11%)         | 15,840                    | 12                  | 116              |
| 5448 Lb4 T0    | 11,679,250  | 679,170        | 32,819             | 711,989 (6%)          | 10,967,261 | 10,879,152 (99%)     | 8,645                     | 6                   | 213              |
| 5448 Lb4 T1    | 15,856,339  | 14,747,260     | 255,938            | 15,003,198 (95%)      | 853,141    | 446,419 (52%)        | 42,032                    | 32                  | 44               |
| 5448 Lb4 T2    | 10,873,096  | 10,490,140     | 58,750             | 10,548,890 (97%)      | 324,206    | 119,664 (37%)        | 15,401                    | 12                  | 119              |
| 5448 Lb4 T3    | 13,664,074  | 12,976,990     | 53,330             | 13,030,320 (5%)       | 633,754    | 401,089 (63%)        | 26,038                    | 20                  | 71               |
| Master 5448 T0 | 52,294,020  | 23,994,324     | 1,591,301          | 25,585,625 (49%)      | 26,708,395 | 25,614,805 (96%)     | 79,622                    | 60                  | 23               |
| Master 5448 T1 | 59,282,976  | 52,913,759     | 2,076,412          | 54,990,171 (93%)      | 4,292,805  | 2,316,384 (54%)      | 107,059                   | 80                  | 17               |
| Master 5448 T2 | 48,967,489  | 43,419,931     | 2,696,838          | 46,116,769 (94%)      | 2,850,720  | 1,546,348 (54%)      | 90,768                    | 68                  | 20               |
| Master 5448 T3 | 59,480,969  | 52,290,716     | 4,364,866          | 56,655,582 (95%)      | 2,825,387  | 1,142,629 (40%)      | 65,183                    | 49                  | 28               |
| NZ131 T0       | 3,460,214   | 1,652,565      | 88,035             | 1,740,600 (50%)       | 1,719,614  | 1,579,596 (92%)      | 52,464                    | 40                  | 35               |
| NZ131 T1       | 31,730,825  | 20,195,930     | 1,717,501          | 21,913,431 (69%)      | 9,817,394  | 7,636,932 (78%)      | 111,001                   | 84                  | 16               |
| NZ131 T2       | 17,433,089  | 10,882,091     | 220,199            | 11,102,290 (64%)      | 6,330,799  | 5,390,105 (85%)      | 67,449                    | 51                  | 27               |
| NZ131 T3       | 44,784,994  | 36,885,896     | 307,314            | 37,193,210 (83%)      | 7,591,784  | 4,164,076 (55%)      | 57,377                    | 44                  | 32               |

(a) Sample name describes the GAS strain (i.e GAS 5448 or NZ131) used to produce the Krmit library. For 5448, 4 independent libraries (Lb1 to Lb4) were analyzed separately.

The different libraries produced (T0) were subjected to 3 additional passages in THY (T1 to T3). Master 5448 is the combination of the reads from the 4 initial libraries in 5448.

(b) Reads aligning to more than one position on the chromosome were randomly placed onto the GAS chromosome.

(c) Percentage in parenthesis represents the proportion of the initial reads (sum of strictly aligned and randomly placed) that align to the GAS genome.

(d) Percentage in parenthesis corresponds to the proportion of reads among the reads that failed to align to the GAS genome that were aligned to the pKRMIT plasmid sequence.

(e) The saturation index depicts the proportion of unique TA sites found on the GAS chromosome hit at least once by Krmit.

(f) Calculated distance separating two adjacent TA sites where Krmit inserted.

**Table S2. Selection of reads for the Bayesian analysis.**

| Library    | All TIS(a) |                     | TIS with at least 2 <i>Krmit</i> copies(b) |                     |
|------------|------------|---------------------|--------------------------------------------|---------------------|
|            | Unique TIS | Saturation index(c) | Unique TIS                                 | Saturation index(c) |
| 5448 (T0)  | 79,622     | 60                  | 48,250                                     | 36                  |
| 5448 (T1)  | 107,059    | 80                  | 74,428                                     | 56                  |
| 5448 (T2)  | 90,768     | 68                  | 56,967                                     | 43                  |
| 5448 (T3)  | 65,183     | 49                  | 24,716                                     | 19                  |
| NZ131 (T0) | 52,464     | 40                  | 39,254                                     | 30                  |
| NZ131 (T1) | 111,001    | 84                  | 79,307                                     | 60                  |
| NZ131 (T2) | 67,449     | 51                  | 35,787                                     | 27                  |
| NZ131 (T3) | 57,377     | 44                  | 11,487                                     | 9                   |

(a) Recapitulation of the total number of unique transposon insertion sites (TIS) and saturation indexes for the *Krmit* libraries produced in GAS 5448 and NZ131.

(b) The Bayesian analysis for gene essentiality prediction called for eliminating TIS with one *Krmit* insertion. The remaining reads have at least two *Krmit* counts.

(c) The saturation index depicts the proportion of unique TA sites found on the GAS chromosome hit at least once by *Krmit*.

**Table S3. Bayesian analysis of Tn-seq datasets for GAS M1T1 5448 grown *in vitro*.**

(a) Spy numbers from MGAS5005 genome.

(b) When available, gene name is provided.

| Locus Tag(a)    | Gene Name(b) | Start | Stop  | Length | Bayesian for T <sub>0</sub> |      | Bayesian for T <sub>1</sub> |      | Bayesian for T <sub>2</sub> |      |
|-----------------|--------------|-------|-------|--------|-----------------------------|------|-----------------------------|------|-----------------------------|------|
|                 |              |       |       |        | Z score                     | Call | Z score                     | Call | Z score                     | Call |
| M5005_Spy_0001  | dnaA         | 202   | 1557  | 451    | 1                           | E    | 1                           | E    | 1                           | E    |
| M5005_Spy_0002  | dnaN         | 1712  | 2848  | 378    | 1                           | E    | 1                           | E    | 1                           | E    |
| M5005_Spy_0003  | -            | 2923  | 3120  | 65     | 0                           | NE   | 0                           | NE   | 0                           | NE   |
| M5005_Spy_0004  | ychF         | 3450  | 4565  | 371    | 0                           | NE   | 0                           | NE   | 0                           | NE   |
| M5005_Spy_0005  | pth          | 4635  | 5204  | 189    | 0.99875                     | E    | 0.99975                     | E    | 0.98                        | U    |
| M5005_Spy_0006  | trcF         | 5207  | 8710  | 1167   | 0.00025                     | NE   | 0                           | NE   | 0                           | NE   |
| M5005_Spy_0007  | -            | 8872  | 9144  | 90     | 0                           | NE   | 0                           | NE   | 0                           | NE   |
| M5005_Spy_0008  | divIC        | 9131  | 9502  | 123    | 0.00025                     | NE   | 0.0015                      | NE   | 0.001                       | NE   |
| M5005_Spy_0009  | -            | 9499  | 9624  | 41     | -1                          | S    | -1                          | S    | -1                          | S    |
| M5005_Spy_0010  | -            | 9637  | 10923 | 428    | 0                           | NE   | 0                           | NE   | 0                           | NE   |
| M5005_Spy_0011  | tilS/mesJ    | 10920 | 12206 | 428    | 1                           | E    | 1                           | E    | 1                           | E    |
| M5005_Spy_0012  | hpt          | 12211 | 12753 | 180    | 0.999                       | E    | 0.00025                     | NE   | 1                           | E    |
| M5005_Spy_0013  | ftsH         | 12775 | 14754 | 659    | 0.999                       | E    | 1                           | E    | 1                           | E    |
| M5005_Spy_0014  | -            | 15079 | 16470 | 463    | 0                           | NE   | 0                           | NE   | 0                           | NE   |
| M5005_Spy_0015c | -            | 16811 | 16945 | 44     | -1                          | S    | -1                          | S    | -1                          | S    |
| M5005_Spy_0017  | sibA         | 31134 | 32330 | 398    | 1                           | E    | 1                           | E    | 1                           | E    |
| M5005_Spy_0018  | prsA.2       | 32583 | 33545 | 320    | 0.98775                     | U    | 1                           | E    | 1                           | E    |
| M5005_Spy_0019  | recO         | 33731 | 34486 | 251    | 0                           | NE   | 0                           | NE   | 0                           | NE   |
| M5005_Spy_0020  | plsX         | 34589 | 35596 | 335    | 0.99875                     | E    | 1                           | E    | 1                           | E    |
| M5005_Spy_0021  | acpP.2       | 35589 | 35831 | 80     | 0.00025                     | NE   | 0.9235                      | U    | 0.222                       | U    |
| M5005_Spy_0022  | -            | 35952 | 36686 | 244    | 0.107                       | U    | 0                           | NE   | 0                           | NE   |
| M5005_Spy_0023  | -            | 36762 | 40535 | 1257   | 0.00025                     | NE   | 0                           | NE   | 0                           | NE   |
| M5005_Spy_0024  | purF         | 40696 | 42150 | 484    | 0                           | NE   | 0                           | NE   | 0                           | NE   |
| M5005_Spy_0025  | purM         | 42178 | 43200 | 340    | 0.00025                     | NE   | 0                           | NE   | 0                           | NE   |
| M5005_Spy_0026  | purN         | 43368 | 43922 | 184    | 0                           | NE   | 0                           | NE   | 0                           | NE   |
| M5005_Spy_0027  | purH         | 44106 | 45653 | 515    | 0                           | NE   | 0                           | NE   | 0                           | NE   |
| M5005_Spy_0028c | -            | 45711 | 46835 | 374    | 0                           | NE   | 0                           | NE   | 0                           | NE   |
| M5005_Spy_0029  | purD         | 46998 | 48353 | 451    | 0                           | NE   | 0                           | NE   | 0                           | NE   |
| M5005_Spy_0030  | purE         | 48511 | 49122 | 203    | 0                           | NE   | 0                           | NE   | 0                           | NE   |
| M5005_Spy_0031  | purK         | 49106 | 50182 | 358    | 0.00175                     | NE   | 0                           | NE   | 0                           | NE   |
| M5005_Spy_0032  | -            | 50209 | 51852 | 547    | 0                           | NE   | 0                           | NE   | 0                           | NE   |
| M5005_Spy_0033  | purB         | 51870 | 53162 | 430    | 0.00025                     | NE   | 0                           | NE   | 0                           | NE   |
| M5005_Spy_0034  | -            | 53294 | 54205 | 303    | 0.00025                     | NE   | 0                           | NE   | 0                           | NE   |
| M5005_Spy_0035  | ruvB         | 54431 | 55429 | 332    | 0                           | NE   | 0                           | NE   | 0.002                       | NE   |
| M5005_Spy_0036  | -            | 55567 | 56004 | 145    | 0                           | NE   | 0                           | NE   | 0                           | NE   |
| M5005_Spy_0037  | -            | 56027 | 56428 | 133    | 0.00025                     | NE   | 1                           | E    | 0.002                       | NE   |
| M5005_Spy_0038  | -            | 56425 | 58200 | 591    | 0.40175                     | U    | 1                           | E    | 1                           | E    |
| M5005_Spy_0039  | adh2/adhE    | 58509 | 61151 | 880    | 0                           | NE   | 0                           | NE   | 0                           | NE   |
| M5005_Spy_0040  | adhA/adhP    | 61403 | 62419 | 338    | 0                           | NE   | 0                           | NE   | 0                           | NE   |
| M5005_Spy_0041  | norM         | 62807 | 63778 | 323    | 0                           | NE   | 0                           | NE   | 0                           | NE   |
| M5005_Spy_0043  | rpsJ         | 64301 | 64609 | 102    | 0.99                        | U    | 1                           | E    | 0.999                       | E    |
| M5005_Spy_0044  | rplC         | 64825 | 65451 | 208    | 0.9915                      | U    | 1                           | E    | 1                           | E    |
| M5005_Spy_0045  | rplD         | 65475 | 66098 | 207    | 1                           | E    | 1                           | E    | 1                           | E    |
| M5005_Spy_0046  | rplW         | 66098 | 66394 | 98     | 0.002                       | NE   | 0                           | NE   | 0                           | NE   |
| M5005_Spy_0047  | rplB         | 66412 | 67245 | 277    | 0.99875                     | E    | 1                           | E    | 1                           | E    |
| M5005_Spy_0048  | rpsS         | 67384 | 67662 | 92     | 0.992                       | U    | 0.00575                     | NE   | 0.999                       | E    |
| M5005_Spy_0049  | rplV         | 67678 | 68022 | 114    | 0.99825                     | E    | 1                           | E    | 1                           | E    |
| M5005_Spy_0050  | rpsC         | 68035 | 68688 | 217    | 0.993                       | U    | 1                           | E    | 1                           | E    |
| M5005_Spy_0051  | rplP         | 68692 | 69105 | 137    | 0.99925                     | E    | 1                           | E    | 1                           | E    |
| M5005_Spy_0052  | rpmC         | 69115 | 69321 | 68     | 0.90175                     | U    | 0                           | NE   | 0                           | NE   |
| M5005_Spy_0053  | rpsQ         | 69347 | 69607 | 86     | 0.99925                     | E    | 1                           | E    | 0.009                       | NE   |
| M5005_Spy_0054  | rplN         | 69632 | 70000 | 122    | 0.00025                     | NE   | 0.01675                     | NE   | 1                           | E    |
| M5005_Spy_0055  | rplX         | 70079 | 70384 | 101    | 0.001                       | NE   | 0.78675                     | U    | 0.024                       | NE   |
| M5005_Spy_0056  | rplE         | 70408 | 70950 | 180    | 1                           | E    | 0.70775                     | U    | 0.987                       | U    |
| M5005_Spy_0057  | rpsN         | 70966 | 71151 | 61     | 0.00975                     | NE   | 0.999                       | E    | 0.99                        | U    |
| M5005_Spy_0058  | rpsH         | 71302 | 71700 | 132    | 0.99875                     | E    | 0.02525                     | NE   | 0.001                       | NE   |
| M5005_Spy_0059  | rplF         | 71903 | 72439 | 178    | 1                           | E    | 1                           | E    | 1                           | E    |
| M5005_Spy_0060  | rplR         | 72544 | 72900 | 118    | 0.88275                     | U    | 1                           | E    | 0.991                       | U    |

|                 |          |        |        |      |         |    |         |    |       |    |
|-----------------|----------|--------|--------|------|---------|----|---------|----|-------|----|
| M5005_Spy_0061  | rpsE     | 72919  | 73413  | 164  | 0.9995  | E  | 1       | E  | 1     | E  |
| M5005_Spy_0062  | rpmD     | 73428  | 73610  | 60   | 0.00025 | NE | 1       | E  | 1     | E  |
| M5005_Spy_0063  | rplO     | 73824  | 74264  | 146  | 0.00025 | NE | 0.00025 | NE | 0.001 | NE |
| M5005_Spy_0064  | secY     | 74281  | 75585  | 434  | 0.99975 | E  | 1       | E  | 1     | E  |
| M5005_Spy_0065  | adk      | 75735  | 76373  | 212  | 0.00025 | NE | 1       | E  | 0.08  | U  |
| M5005_Spy_0066  | infA     | 76491  | 76709  | 72   | 0.99125 | U  | 1       | E  | 0.999 | E  |
| M5005_Spy_0067  | rpmJ     | 76735  | 76851  | 38   | -1      | S  | -1      | S  | -1    | S  |
| M5005_Spy_0068  | rpsM     | 76869  | 77234  | 121  | 0.999   | E  | 0.9995  | E  | 0.999 | E  |
| M5005_Spy_0069  | rpsK     | 77252  | 77635  | 127  | 0.001   | NE | 1       | E  | 1     | E  |
| M5005_Spy_0070  | rpoA     | 77681  | 78619  | 312  | 1       | E  | 1       | E  | 1     | E  |
| M5005_Spy_0071  | rplQ     | 78634  | 79020  | 128  | 0.00025 | NE | 1       | E  | 1     | E  |
| M5005_Spy_0072c | -        | 79618  | 79752  | 44   | -1      | S  | -1      | S  | -1    | S  |
| M5005_Spy_0073  | -        | 86264  | 86449  | 61   | 0       | NE | 0       | NE | 0.004 | NE |
| M5005_Spy_0074  | -        | 87087  | 87224  | 45   | -1      | S  | -1      | S  | -1    | S  |
| M5005_Spy_0075  | -        | 87235  | 87393  | 52   | -1      | S  | -1      | S  | -1    | S  |
| M5005_Spy_0076  | -        | 87499  | 87660  | 53   | -1      | S  | -1      | S  | -1    | S  |
| M5005_Spy_0077  | adcR     | 87770  | 88213  | 147  | 0       | NE | 0       | NE | 0     | NE |
| M5005_Spy_0078  | adcC     | 88217  | 88936  | 239  | 0       | NE | 0       | NE | 0     | NE |
| M5005_Spy_0079  | adcB     | 88929  | 89744  | 271  | 0       | NE | 0       | NE | 0     | NE |
| M5005_Spy_0080c | -        | 89784  | 90167  | 127  | 0       | NE | 0       | NE | 0     | NE |
| M5005_Spy_0081c | tyrS     | 90218  | 91474  | 418  | 1       | E  | 0.99975 | E  | 1     | E  |
| M5005_Spy_0082  | pbp1b    | 91566  | 93878  | 770  | 0       | NE | 0       | NE | 0     | NE |
| M5005_Spy_0083  | rpoB     | 94142  | 97708  | 1188 | 1       | E  | 1       | E  | 1     | E  |
| M5005_Spy_0084  | rpoC     | 97799  | 101440 | 1213 | 1       | E  | 1       | E  | 1     | E  |
| M5005_Spy_0085  | -        | 101592 | 101957 | 121  | 0       | NE | 0       | NE | 0     | NE |
| M5005_Spy_0086  | comYA    | 102050 | 102988 | 312  | 0       | NE | 0       | NE | 0     | NE |
| M5005_Spy_0087  | comYB    | 102867 | 103958 | 363  | 0.00025 | NE | 0       | NE | 0     | NE |
| M5005_Spy_0088  | comYC    | 103960 | 104286 | 108  | 0       | NE | 0       | NE | 0     | NE |
| M5005_Spy_0089  | -        | 104360 | 104689 | 109  | 0       | NE | 0       | NE | 0     | NE |
| M5005_Spy_0090  | -        | 104646 | 104930 | 94   | 0       | NE | 0       | NE | 0     | NE |
| M5005_Spy_0091  | comYD    | 104923 | 105357 | 144  | 0       | NE | 0       | NE | 0     | NE |
| M5005_Spy_0092  | -        | 105341 | 105667 | 108  | 0       | NE | 0       | NE | 0     | NE |
| M5005_Spy_0093  | -        | 105765 | 106718 | 317  | 0       | NE | 0       | NE | 0     | NE |
| M5005_Spy_0094  | ackA     | 106777 | 107973 | 398  | 0.00025 | NE | 0       | NE | 0.001 | NE |
| M5005_Spy_0095  | -        | 108160 | 108468 | 102  | 0       | NE | 0       | NE | 0     | NE |
| M5005_Spy_0096c | proC     | 108551 | 109321 | 256  | 0       | NE | 0       | NE | 0     | NE |
| M5005_Spy_0097c | pepA     | 109369 | 110436 | 355  | 0       | NE | 0       | NE | 0     | NE |
| M5005_Spy_0098  | -        | 110546 | 110710 | 54   | -1      | S  | -1      | S  | -1    | S  |
| M5005_Spy_0099  | -        | 110892 | 111185 | 97   | 0       | NE | 0       | NE | 0     | NE |
| M5005_Spy_0100  | trx.1    | 111182 | 111499 | 105  | 0       | NE | 0       | NE | 0     | NE |
| M5005_Spy_0101  | -        | 111517 | 112143 | 208  | 0       | NE | 0       | NE | 0     | NE |
| M5005_Spy_0102  | ssb      | 112295 | 112690 | 131  | 0       | NE | 0       | NE | 0     | NE |
| M5005_Spy_0103c | -        | 112950 | 113591 | 213  | 0       | NE | 0       | NE | 0     | NE |
| M5005_Spy_0104c | -        | 113611 | 114588 | 325  | 0       | NE | 0       | NE | 0     | NE |
| M5005_Spy_0105c | hslO     | 114575 | 115447 | 290  | 0       | NE | 0       | NE | 0     | NE |
| M5005_Spy_0106c | rofA/nra | 115594 | 117087 | 497  | 0       | NE | 0       | NE | 0     | NE |
| M5005_Spy_0107  | cbp      | 117335 | 119623 | 762  | 0       | NE | 0       | NE | 0     | NE |
| M5005_Spy_0108  | lepA-1   | 119616 | 120173 | 185  | 0       | NE | 0       | NE | 0     | NE |
| M5005_Spy_0109  | prtF     | 120206 | 121228 | 340  | 0       | NE | 0       | NE | 0     | NE |
| M5005_Spy_0110  | eftLSL.B | 121238 | 121951 | 237  | 0       | NE | 0       | NE | 0     | NE |
| M5005_Spy_0111  | -        | 121973 | 122620 | 215  | 0       | NE | 0       | NE | 0     | NE |
| M5005_Spy_0112c | -        | 122807 | 124129 | 440  | 0       | NE | 0       | NE | 0     | NE |
| M5005_Spy_0113c | -        | 124370 | 124720 | 116  | 0       | NE | 0       | NE | 0     | NE |
| M5005_Spy_0114  | -        | 125024 | 125779 | 251  | 0       | NE | 0       | NE | 0     | NE |
| M5005_Spy_0115c | -        | 125973 | 126638 | 221  | 0       | NE | 0       | NE | 0     | NE |
| M5005_Spy_0116  | atoE     | 126987 | 128393 | 468  | 0       | NE | 0       | NE | 0     | NE |
| M5005_Spy_0117c | -        | 128461 | 128856 | 131  | 0       | NE | 0       | NE | 0     | NE |
| M5005_Spy_0118c | -        | 128952 | 129371 | 139  | 0       | NE | 0       | NE | 0     | NE |
| M5005_Spy_0119  | -        | 129492 | 130676 | 394  | 0       | NE | 0       | NE | 0     | NE |
| M5005_Spy_0120  | atoD.2   | 130688 | 131347 | 219  | 0       | NE | 0       | NE | 0     | NE |
| M5005_Spy_0121  | -        | 131350 | 131997 | 215  | 0       | NE | 0       | NE | 0     | NE |
| M5005_Spy_0122c | -        | 132119 | 132799 | 226  | 0       | NE | 0       | NE | 0     | NE |
| M5005_Spy_0123  | -        | 132973 | 133338 | 121  | 0       | NE | 0       | NE | 0     | NE |

|                 |        |        |        |     |         |    |         |    |       |    |
|-----------------|--------|--------|--------|-----|---------|----|---------|----|-------|----|
| M5005_Spy_0124  | sloR   | 133375 | 134394 | 339 | 0       | NE | 0       | NE | 0     | NE |
| M5005_Spy_0125  | -      | 134849 | 135169 | 106 | 0       | NE | 0       | NE | 0     | NE |
| M5005_Spy_0126  | ntpI   | 135159 | 137180 | 673 | 0       | NE | 0       | NE | 0     | NE |
| M5005_Spy_0127  | ntpK   | 137182 | 137661 | 159 | 0.00025 | NE | 0       | NE | 0     | NE |
| M5005_Spy_0128  | ntpE   | 137729 | 138313 | 194 | 0       | NE | 0       | NE | 0     | NE |
| M5005_Spy_0129  | ntpC   | 138329 | 139327 | 332 | 0       | NE | 0       | NE | 0     | NE |
| M5005_Spy_0130  | ntpF   | 139324 | 139644 | 106 | 0       | NE | 0       | NE | 0     | NE |
| M5005_Spy_0131  | ntpA   | 139845 | 141620 | 591 | 0.00025 | NE | 0       | NE | 0     | NE |
| M5005_Spy_0132  | ntpB   | 141621 | 143036 | 471 | 0       | NE | 0       | NE | 0     | NE |
| M5005_Spy_0133  | ntpD   | 143081 | 143707 | 208 | 0       | NE | 0       | NE | 0     | NE |
| M5005_Spy_0134c | -      | 143827 | 145089 | 420 | 0       | NE | 0       | NE | 0     | NE |
| M5005_Spy_0135c | -      | 145102 | 145980 | 292 | 0       | NE | 0       | NE | 0     | NE |
| M5005_Spy_0136  | purA   | 146418 | 147710 | 430 | 0       | NE | 0       | NE | 0     | NE |
| M5005_Spy_0137  | -      | 148037 | 149080 | 347 | 0       | NE | 0       | NE | 0     | NE |
| M5005_Spy_0138  | nusG   | 149253 | 149792 | 179 | 0.79375 | U  | 0.47925 | U  | 0.999 | E  |
| M5005_Spy_0139  | nga    | 150154 | 151518 | 454 | 0       | NE | 0       | NE | 0     | NE |
| M5005_Spy_0140  | -      | 151523 | 152008 | 161 | 0       | NE | 0       | NE | 0     | NE |
| M5005_Spy_0141  | slo    | 152032 | 153747 | 571 | 0       | NE | 0       | NE | 0     | NE |
| M5005_Spy_0142  | -      | 154002 | 154433 | 143 | 0       | NE | 0       | NE | 0     | NE |
| M5005_Spy_0143c | -      | 154619 | 154855 | 78  | 0       | NE | 0       | NE | 0     | NE |
| M5005_Spy_0144c | -      | 155265 | 155432 | 55  | -1      | S  | -1      | S  | -1    | S  |
| M5005_Spy_0145c | -      | 155607 | 155894 | 95  | 0       | NE | 0       | NE | 0     | NE |
| M5005_Spy_0146  | metB   | 156335 | 157525 | 396 | 0       | NE | 0       | NE | 0     | NE |
| M5005_Spy_0147  | leuS   | 157736 | 160237 | 833 | 1       | E  | 1       | E  | 1     | E  |
| M5005_Spy_0148  | ulaA   | 160544 | 161977 | 477 | 0       | NE | 0       | NE | 0.28  | U  |
| M5005_Spy_0149  | -      | 162048 | 162326 | 92  | 0       | NE | 0       | NE | 0     | NE |
| M5005_Spy_0150  | -      | 162449 | 162934 | 161 | 0       | NE | 0       | NE | 0     | NE |
| M5005_Spy_0151  | ulaD   | 163025 | 163687 | 220 | 0.00025 | NE | 0       | NE | 0     | NE |
| M5005_Spy_0152  | -      | 163692 | 164555 | 287 | 0       | NE | 0       | NE | 0     | NE |
| M5005_Spy_0153  | araD   | 164557 | 165261 | 234 | 0       | NE | 0       | NE | 0     | NE |
| M5005_Spy_0154  | -      | 165319 | 165465 | 48  | -1      | S  | -1      | S  | -1    | S  |
| M5005_Spy_0155  | -      | 165586 | 167232 | 548 | 0       | NE | 0       | NE | 0     | NE |
| M5005_Spy_0156  | -      | 167485 | 168576 | 363 | 0       | NE | 0       | NE | 0     | NE |
| M5005_Spy_0157  | opuAA  | 169064 | 170260 | 398 | 0       | NE | 0       | NE | 0     | NE |
| M5005_Spy_0158  | opuABC | 170276 | 172003 | 575 | 0       | NE | 0       | NE | 0.001 | NE |
| M5005_Spy_0159  | polA   | 172134 | 174776 | 880 | 0.0005  | NE | 0.999   | E  | 1     | E  |
| M5005_Spy_0160  | -      | 174963 | 175418 | 151 | 0       | NE | 0       | NE | 0     | NE |
| M5005_Spy_0161  | perR   | 175470 | 175937 | 155 | 0       | NE | 0       | NE | 0     | NE |
| M5005_Spy_0162  | vlg    | 176094 | 176393 | 99  | 0       | NE | 0       | NE | 0     | NE |
| M5005_Spy_0163  | -      | 176615 | 177949 | 444 | 0.00025 | NE | 0       | NE | 0     | NE |
| M5005_Spy_0164  | -      | 177942 | 178472 | 176 | 0       | NE | 0       | NE | 0     | NE |
| M5005_Spy_0165c | -      | 178519 | 178761 | 80  | 0       | NE | 0       | NE | 0     | NE |
| M5005_Spy_0166c | -      | 178801 | 179016 | 71  | 0       | NE | 0       | NE | 0     | NE |
| M5005_Spy_0167c | -      | 179056 | 179625 | 189 | 0       | NE | 0       | NE | 0     | NE |
| M5005_Spy_0168c | -      | 179658 | 179873 | 71  | 0       | NE | 0       | NE | 0     | NE |
| M5005_Spy_0169c | -      | 180029 | 181339 | 436 | 0       | NE | 0       | NE | 0     | NE |
| M5005_Spy_0170  | nadC   | 181563 | 182435 | 290 | 0       | NE | 0       | NE | 0     | NE |
| M5005_Spy_0171c | -      | 182735 | 183541 | 268 | 0       | NE | 0       | NE | 0     | NE |
| M5005_Spy_0172c | -      | 183562 | 184077 | 171 | 0       | NE | 0       | NE | 0     | NE |
| M5005_Spy_0173c | -      | 184163 | 185026 | 287 | 0       | NE | 0       | NE | 0     | NE |
| M5005_Spy_0174  | -      | 185063 | 185221 | 52  | -1      | S  | -1      | S  | -1    | S  |
| M5005_Spy_0175  | tgt    | 185245 | 186387 | 380 | 0       | NE | 0       | NE | 0     | NE |
| M5005_Spy_0176  | -      | 186604 | 186915 | 103 | 0.00025 | NE | 0       | NE | 0     | NE |
| M5005_Spy_0177  | bioY   | 186919 | 187458 | 179 | 0       | NE | 0       | NE | 0     | NE |
| M5005_Spy_0178  | -      | 187598 | 188377 | 259 | 0       | NE | 0       | NE | 0     | NE |
| M5005_Spy_0179  | -      | 188377 | 188892 | 171 | 0       | NE | 0       | NE | 0.001 | NE |
| M5005_Spy_0180c | -      | 189506 | 190726 | 406 | 0       | NE | 0       | NE | 0     | NE |
| M5005_Spy_0181  | -      | 190780 | 190887 | 35  | -1      | S  | -1      | S  | -1    | S  |
| M5005_Spy_0182  | speG   | 191138 | 191842 | 234 | 0       | NE | 0       | NE | 0     | NE |
| M5005_Spy_0183  | -      | 191927 | 192046 | 39  | -1      | S  | -1      | S  | -1    | S  |
| M5005_Spy_0184  | -      | 192082 | 192201 | 39  | -1      | S  | -1      | S  | -1    | S  |
| M5005_Spy_0185  | pgi    | 192298 | 193647 | 449 | 1       | E  | 1       | E  | 1     | E  |
| M5005_Spy_0186c | ralp4  | 193996 | 195504 | 502 | 0       | NE | 0       | NE | 0     | NE |

|                 |           |        |        |     |         |    |         |    |       |    |
|-----------------|-----------|--------|--------|-----|---------|----|---------|----|-------|----|
| M5005_Spy_0187  | -         | 196059 | 196763 | 234 | 0       | NE | 0       | NE | 0     | NE |
| M5005_Spy_0188  | -         | 196666 | 197181 | 171 | 0       | NE | 0       | NE | 0     | NE |
| M5005_Spy_0189  | -         | 197165 | 197290 | 41  | -1      | S  | -1      | S  | -1    | S  |
| M5005_Spy_0190  | -         | 197371 | 197478 | 35  | -1      | S  | -1      | S  | -1    | S  |
| M5005_Spy_0191  | -         | 197506 | 198177 | 223 | 0       | NE | 0       | NE | 0     | NE |
| M5005_Spy_0192c | hasC.2    | 198276 | 199175 | 299 | 0.00025 | NE | 1       | E  | 0.002 | NE |
| M5005_Spy_0194c | gpsA      | 199408 | 200223 | 271 | 1       | E  | 1       | E  | 1     | E  |
| M5005_Spy_0195  | -         | 200521 | 200970 | 149 | 0       | NE | 0       | NE | 0     | NE |
| M5005_Spy_0196  | -         | 200963 | 202669 | 568 | 0       | NE | 0       | NE | 0.001 | NE |
| M5005_Spy_0197  | -         | 202672 | 204456 | 594 | 0.00025 | NE | 0       | NE | 0     | NE |
| M5005_Spy_0198  | -         | 204574 | 205341 | 255 | 0       | NE | 0       | NE | 0     | NE |
| M5005_Spy_0199  | dut       | 205451 | 205897 | 148 | 0.00025 | NE | 0       | NE | 0.001 | NE |
| M5005_Spy_0200  | radA      | 205978 | 207339 | 453 | 0.00025 | NE | 0       | NE | 0     | NE |
| M5005_Spy_0201  | -         | 207528 | 208025 | 165 | 0       | NE | 0       | NE | 1     | E  |
| M5005_Spy_0202  | -         | 208156 | 208866 | 236 | 0       | NE | 0       | NE | 0     | NE |
| M5005_Spy_0203  | gltX      | 209048 | 210493 | 481 | 0.98775 | U  | 1       | E  | 1     | E  |
| M5005_Spy_0204  | fasB      | 210888 | 212234 | 448 | 0       | NE | 0       | NE | 0     | NE |
| M5005_Spy_0205  | fasC      | 212231 | 213514 | 427 | 0.00025 | NE | 0       | NE | 0     | NE |
| M5005_Spy_0206  | fasA      | 213518 | 214258 | 246 | 0       | NE | 0       | NE | 0     | NE |
| M5005_Spy_0207  | rnpA      | 214798 | 215157 | 119 | 0.15675 | U  | 0.99    | U  | 1     | E  |
| M5005_Spy_0208  | -         | 215141 | 215950 | 269 | 0       | NE | 0       | NE | 0     | NE |
| M5005_Spy_0209  | -         | 215962 | 216876 | 304 | 0       | NE | 0       | NE | 0     | NE |
| M5005_Spy_0210  | -         | 216961 | 217083 | 40  | -1      | S  | -1      | S  | -1    | S  |
| M5005_Spy_0211  | rpmH      | 217191 | 217325 | 44  | -1      | S  | -1      | S  | -1    | S  |
| M5005_Spy_0212  | -         | 217599 | 218303 | 234 | 0       | NE | 0       | NE | 0     | NE |
| M5005_Spy_0213  | -         | 218352 | 219671 | 439 | 0       | NE | 0       | NE | 0     | NE |
| M5005_Spy_0214  | -         | 219774 | 220661 | 295 | 0       | NE | 0       | NE | 0     | NE |
| M5005_Spy_0215  | -         | 220674 | 221504 | 276 | 0       | NE | 0       | NE | 0     | NE |
| M5005_Spy_0216  | -         | 221661 | 222323 | 220 | 0       | NE | 0       | NE | 0     | NE |
| M5005_Spy_0217  | nanH      | 222335 | 223249 | 304 | 0       | NE | 0       | NE | 0     | NE |
| M5005_Spy_0218  | -         | 223271 | 224209 | 312 | 0       | NE | 0       | NE | 0     | NE |
| M5005_Spy_0219c | -         | 224320 | 225150 | 276 | 0       | NE | 0       | NE | 0     | NE |
| M5005_Spy_0220  | tatD      | 225402 | 226226 | 274 | 0       | NE | 0       | NE | 0     | NE |
| M5005_Spy_0221  | -         | 226198 | 226788 | 196 | 0       | NE | 0       | NE | 0     | NE |
| M5005_Spy_0222  | ksgA      | 226902 | 227774 | 290 | 0.0025  | NE | 0       | NE | 0     | NE |
| M5005_Spy_0223  | engC      | 228198 | 229070 | 290 | 0.639   | U  | 0.99975 | E  | 1     | E  |
| M5005_Spy_0224  | rpe       | 229080 | 229742 | 220 | 0.00025 | NE | 0       | NE | 1     | E  |
| M5005_Spy_0225  | -         | 229735 | 230367 | 210 | 0       | NE | 0       | NE | 0.001 | NE |
| M5005_Spy_0226  | -         | 230369 | 231640 | 423 | 0       | NE | 0       | NE | 0     | NE |
| M5005_Spy_0227  | cbf       | 231630 | 232568 | 312 | 0       | NE | 0       | NE | 0     | NE |
| M5005_Spy_0228  | purR      | 232835 | 233674 | 279 | 0       | NE | 0       | NE | 0     | NE |
| M5005_Spy_0229  | prgA      | 233665 | 236286 | 873 | 0.00025 | NE | 0       | NE | 0     | NE |
| M5005_Spy_0230  | rpsL      | 236494 | 236907 | 137 | 0.99225 | U  | 0.99975 | E  | 0.992 | E  |
| M5005_Spy_0231  | rpsG      | 236928 | 237398 | 156 | 0.964   | U  | 1       | E  | 0.998 | E  |
| M5005_Spy_0232  | fus       | 237765 | 239843 | 692 | 1       | E  | 1       | E  | 1     | E  |
| M5005_Spy_0233  | plr       | 240191 | 241201 | 336 | 1       | E  | 1       | E  | 1     | E  |
| M5005_Spy_0234c | -         | 241427 | 241543 | 38  | -1      | S  | -1      | S  | -1    | S  |
| M5005_Spy_0235c | -         | 241685 | 242425 | 246 | 1       | E  | 1       | E  | 1     | E  |
| M5005_Spy_0236c | -         | 242418 | 243986 | 522 | 0.67175 | U  | 1       | E  | 1     | E  |
| M5005_Spy_0237  | -         | 244184 | 246082 | 632 | 0       | NE | 0       | NE | 0     | NE |
| M5005_Spy_0238  | uppP/bacA | 246148 | 246987 | 279 | 0       | NE | 0       | NE | 0     | NE |
| M5005_Spy_0239  | mecA      | 247133 | 247894 | 253 | 0       | NE | 0       | NE | 0     | NE |
| M5005_Spy_0240  | rgpG      | 248045 | 249070 | 341 | 1       | E  | 1       | E  | 1     | E  |
| M5005_Spy_0241  | rgpG      | 249040 | 249165 | 41  | -1      | S  | -1      | S  | -1    | S  |
| M5005_Spy_0242  | -         | 249192 | 249962 | 256 | 0       | NE | 0       | NE | 0.998 | E  |
| M5005_Spy_0243  | -         | 250057 | 251319 | 420 | 0       | NE | 0       | NE | 1     | E  |
| M5005_Spy_0244  | nifS3     | 251350 | 252576 | 408 | 0       | NE | 0.00025 | NE | 1     | E  |
| M5005_Spy_0245  | nifU      | 252563 | 253042 | 159 | 0.00025 | NE | 0       | NE | 1     | E  |
| M5005_Spy_0246  | -         | 253035 | 254453 | 472 | 0.0005  | NE | 0       | NE | 1     | E  |
| M5005_Spy_0247c | pbp7      | 254605 | 255786 | 393 | 0       | NE | 0       | NE | 0     | NE |
| M5005_Spy_0248c | dacA2     | 255954 | 257186 | 410 | 0       | NE | 0       | NE | 0     | NE |
| M5005_Spy_0249  | oppA      | 257517 | 259487 | 656 | 0       | NE | 0       | NE | 0     | NE |
| M5005_Spy_0250  | oppB      | 259540 | 261054 | 504 | 0       | NE | 0       | NE | 0     | NE |

|                 |         |        |        |      |         |    |         |    |       |    |
|-----------------|---------|--------|--------|------|---------|----|---------|----|-------|----|
| M5005_Spy_0251  | oppC    | 261054 | 261980 | 308  | 0       | NE | 0       | NE | 0     | NE |
| M5005_Spy_0252  | oppD    | 261989 | 263059 | 356  | 0       | NE | 0       | NE | 0     | NE |
| M5005_Spy_0253  | oppF    | 263052 | 263975 | 307  | 0       | NE | 0       | NE | 0     | NE |
| M5005_Spy_0254c | -       | 264216 | 264362 | 48   | -1      | S  | -1      | S  | -1    | S  |
| M5005_Spy_0255c | -       | 264737 | 264871 | 44   | -1      | S  | -1      | S  | -1    | S  |
| M5005_Spy_0256  | comX1.1 | 270293 | 270844 | 183  | 0       | NE | 0       | NE | 0     | NE |
| M5005_Spy_0257  | -       | 271455 | 272159 | 234  | 0       | NE | 0       | NE | 0     | NE |
| M5005_Spy_0258  | -       | 272062 | 272577 | 171  | 0       | NE | 0       | NE | 0     | NE |
| M5005_Spy_0259  | -       | 272561 | 272665 | 34   | -1      | S  | -1      | S  | -1    | S  |
| M5005_Spy_0260  | -       | 272683 | 273267 | 194  | 0.99975 | E  | 0.99975 | E  | 1     | E  |
| M5005_Spy_0261  | -       | 273267 | 274385 | 372  | 0.86825 | U  | 0.91825 | U  | 1     | E  |
| M5005_Spy_0262  | -       | 274410 | 274718 | 102  | 0       | NE | 0       | NE | 0     | NE |
| M5005_Spy_0263  | nadD    | 274787 | 275419 | 210  | 0.4555  | U  | 0.99875 | E  | 1     | E  |
| M5005_Spy_0264  | -       | 275416 | 276009 | 197  | 0       | NE | 0       | NE | 0.001 | NE |
| M5005_Spy_0265  | -       | 276009 | 276386 | 125  | 0.00025 | NE | 0       | NE | 0     | NE |
| M5005_Spy_0266  | -       | 276428 | 277177 | 249  | 0       | NE | 0       | NE | 0     | NE |
| M5005_Spy_0267  | -       | 277431 | 278537 | 368  | 0       | NE | 0       | NE | 0     | NE |
| M5005_Spy_0268  | -       | 278874 | 279029 | 51   | -1      | S  | -1      | S  | -1    | S  |
| M5005_Spy_0269  | -       | 279019 | 279735 | 238  | 0       | NE | 0       | NE | 0     | NE |
| M5005_Spy_0270  | atmA    | 279938 | 280780 | 280  | 0.00025 | NE | 0       | NE | 0     | NE |
| M5005_Spy_0271  | atmB    | 281109 | 281954 | 281  | 0       | NE | 0       | NE | 0     | NE |
| M5005_Spy_0272  | atmD    | 282204 | 283268 | 354  | 0       | NE | 0       | NE | 0     | NE |
| M5005_Spy_0273  | atmE    | 283269 | 283961 | 230  | 0       | NE | 0       | NE | 0     | NE |
| M5005_Spy_0274c | braB    | 284015 | 285385 | 456  | 0       | NE | 0       | NE | 0     | NE |
| M5005_Spy_0275  | -       | 285619 | 286833 | 404  | 0.00025 | NE | 0       | NE | 0.001 | NE |
| M5005_Spy_0276c | -       | 286888 | 287562 | 224  | 0       | NE | 0       | NE | 0.997 | E  |
| M5005_Spy_0277c | -       | 287572 | 288963 | 463  | 0       | NE | 0       | NE | 0.001 | NE |
| M5005_Spy_0278c | gidB    | 289033 | 289746 | 237  | 0.00025 | NE | 0       | NE | 0     | NE |
| M5005_Spy_0279  | lemA    | 289896 | 290453 | 185  | 0       | NE | 0       | NE | 0     | NE |
| M5005_Spy_0280  | htpX    | 290500 | 291396 | 298  | 0       | NE | 0       | NE | 0     | NE |
| M5005_Spy_0281  | -       | 291630 | 292163 | 177  | 0       | NE | 0       | NE | 0     | NE |
| M5005_Spy_0282  | covR    | 292430 | 293116 | 228  | 0       | NE | 0       | NE | 0     | NE |
| M5005_Spy_0283  | covS    | 293259 | 294623 | 454  | 0       | NE | 0       | NE | 0     | NE |
| M5005_Spy_0284  | nrdR    | 294838 | 295332 | 164  | 0       | NE | 0       | NE | 0.001 | NE |
| M5005_Spy_0285  | dnaB    | 295316 | 296491 | 391  | 0.00075 | NE | 1       | E  | 1     | E  |
| M5005_Spy_0286  | dnaI    | 296492 | 297394 | 300  | 1       | E  | 1       | E  | 1     | E  |
| M5005_Spy_0287  | engA    | 297457 | 298767 | 436  | 1       | E  | 1       | E  | 1     | E  |
| M5005_Spy_0288  | snf     | 298974 | 302072 | 1032 | 0.00025 | NE | 0       | NE | 0.002 | NE |
| M5005_Spy_0289  | -       | 302315 | 302917 | 200  | 0       | NE | 0       | NE | 0     | NE |
| M5005_Spy_0290  | murC    | 302957 | 304285 | 442  | 0.0165  | NE | 1       | E  | 1     | E  |
| M5005_Spy_0291  | -       | 304331 | 304813 | 160  | 0       | NE | 0       | NE | 0     | NE |
| M5005_Spy_0292  | -       | 304931 | 306499 | 522  | 0.0005  | NE | 0       | NE | 1     | E  |
| M5005_Spy_0293  | greA    | 306524 | 307054 | 176  | 0       | NE | 0       | NE | 0     | NE |
| M5005_Spy_0294c | -       | 307269 | 307412 | 47   | -1      | S  | -1      | S  | -1    | S  |
| M5005_Spy_0295c | oxaA    | 307677 | 308600 | 307  | 0.262   | U  | 1       | E  | 1     | E  |
| M5005_Spy_0296c | -       | 308682 | 308960 | 92   | 0       | NE | 0       | NE | 0     | NE |
| M5005_Spy_0297c | -       | 309115 | 309630 | 171  | 0       | NE | 0       | NE | 0     | NE |
| M5005_Spy_0298c | -       | 309533 | 310237 | 234  | 0       | NE | 0       | NE | 0     | NE |
| M5005_Spy_0299  | -       | 310535 | 311272 | 245  | 0       | NE | 0       | NE | 0     | NE |
| M5005_Spy_0300  | -       | 311311 | 311811 | 166  | 0       | NE | 0       | NE | 0     | NE |
| M5005_Spy_0301  | -       | 311826 | 312515 | 229  | 0       | NE | 0       | NE | 0     | NE |
| M5005_Spy_0302  | -       | 312693 | 312935 | 80   | 0.001   | NE | 0.97375 | U  | 0.999 | E  |
| M5005_Spy_0303  | glr     | 313113 | 313907 | 264  | 0.62175 | U  | 1       | E  | 1     | E  |
| M5005_Spy_0304  | -       | 313904 | 314890 | 328  | 0       | NE | 0       | NE | 0     | NE |
| M5005_Spy_0305  | -       | 314869 | 315390 | 173  | 0.00025 | NE | 0       | NE | 0     | NE |
| M5005_Spy_0306  | -       | 315387 | 315848 | 153  | 0       | NE | 0       | NE | 0     | NE |
| M5005_Spy_0307  | xerD    | 315845 | 316591 | 248  | 0.00025 | NE | 0       | NE | 0     | NE |
| M5005_Spy_0308  | scpA    | 316591 | 317292 | 233  | 0       | NE | 0       | NE | 0     | NE |
| M5005_Spy_0309  | scpB    | 317289 | 317840 | 183  | 0.00025 | NE | 0       | NE | 0.001 | NE |
| M5005_Spy_0310  | rluB    | 317939 | 318685 | 248  | 0.00025 | NE | 0       | NE | 0     | NE |
| M5005_Spy_0311  | -       | 318682 | 318945 | 87   | 0       | NE | 0       | NE | 0     | NE |
| M5005_Spy_0312  | -       | 319123 | 319671 | 182  | 0.00025 | NE | 0       | NE | 0     | NE |
| M5005_Spy_0313  | -       | 319982 | 320545 | 187  | 0.00025 | NE | 0.00025 | NE | 1     | E  |

|                 |        |        |        |      |         |    |         |    |       |    |
|-----------------|--------|--------|--------|------|---------|----|---------|----|-------|----|
| M5005_Spy_0314  | -      | 320547 | 321200 | 217  | 0       | NE | 0       | NE | 0     | NE |
| M5005_Spy_0315  | -      | 321493 | 322413 | 306  | 0       | NE | 0       | NE | 0     | NE |
| M5005_Spy_0316  | -      | 322452 | 323006 | 184  | 0       | NE | 0       | NE | 0     | NE |
| M5005_Spy_0317  | hlyX   | 323139 | 324473 | 444  | 0       | NE | 0       | NE | 0     | NE |
| M5005_Spy_0318  | pflC   | 324479 | 325342 | 287  | 0       | NE | 0       | NE | 0     | NE |
| M5005_Spy_0319  | ppaC   | 325473 | 326408 | 311  | 0.99825 | E  | 0.0255  | NE | 0.986 | U  |
| M5005_Spy_0320  | -      | 326484 | 327137 | 217  | 0       | NE | 0       | NE | 0     | NE |
| M5005_Spy_0321c | fhuG   | 327182 | 328108 | 308  | 0       | NE | 0       | NE | 0     | NE |
| M5005_Spy_0322c | fhuB   | 328180 | 329232 | 350  | 0       | NE | 0       | NE | 0     | NE |
| M5005_Spy_0323c | fhuD   | 329222 | 330154 | 310  | 0       | NE | 0       | NE | 0     | NE |
| M5005_Spy_0324c | fhuA   | 330180 | 330962 | 260  | 0       | NE | 0       | NE | 0     | NE |
| M5005_Spy_0325c | murE   | 331208 | 332653 | 481  | 1       | E  | 1       | E  | 1     | E  |
| M5005_Spy_0326  | -      | 332741 | 334375 | 544  | 0.98475 | U  | 1       | E  | 1     | E  |
| M5005_Spy_0327  | upp    | 334543 | 335172 | 209  | 0       | NE | 0       | NE | 0.001 | NE |
| M5005_Spy_0328  | clpP   | 335396 | 335986 | 196  | 0.00025 | NE | 0.00175 | NE | 1     | E  |
| M5005_Spy_0329  | -      | 336478 | 336753 | 91   | 0       | NE | 0       | NE | 0     | NE |
| M5005_Spy_0330  | tmk    | 337002 | 337637 | 211  | 0.998   | E  | 1       | E  | 1     | E  |
| M5005_Spy_0331  | dnaX   | 337655 | 338530 | 291  | 0.99725 | E  | 1       | E  | 1     | E  |
| M5005_Spy_0332  | -      | 338549 | 338788 | 79   | 0.00025 | NE | 0       | NE | 0     | NE |
| M5005_Spy_0333  | -      | 338877 | 339038 | 53   | -1      | S  | -1      | S  | -1    | S  |
| M5005_Spy_0334  | -      | 339193 | 339516 | 107  | 0.00625 | NE | 0       | NE | 0.05  | U  |
| M5005_Spy_0335  | -      | 339521 | 340384 | 287  | 0       | NE | 0       | NE | 0.001 | NE |
| M5005_Spy_0336  | -      | 340411 | 340803 | 130  | 0.00025 | NE | 0       | NE | 0.001 | NE |
| M5005_Spy_0337c | cutC   | 340850 | 341479 | 209  | 0       | NE | 0       | NE | 0     | NE |
| M5005_Spy_0338  | -      | 341778 | 342134 | 118  | 0.00025 | NE | 0       | NE | 0     | NE |
| M5005_Spy_0339c | exoA   | 342208 | 343119 | 303  | 0.05625 | U  | 0       | NE | 0     | NE |
| M5005_Spy_0340  | lctO   | 343269 | 344450 | 393  | 0       | NE | 0       | NE | 0     | NE |
| M5005_Spy_0341  | prtS   | 344713 | 349656 | 1647 | 0       | NE | 0       | NE | 0     | NE |
| M5005_Spy_0343  | -      | 350145 | 350324 | 59   | 0.01475 | NE | 0.00025 | NE | 0.017 | NE |
| M5005_Spy_0344  | -      | 350427 | 351134 | 235  | 0       | NE | 0       | NE | 0     | NE |
| M5005_Spy_0345  | metG   | 351377 | 353374 | 665  | 1       | E  | 1       | E  | 1     | E  |
| M5005_Spy_0346  | -      | 353705 | 353872 | 55   | -1      | S  | -1      | S  | -1    | S  |
| M5005_Spy_0347  | nrdF   | 353869 | 354882 | 337  | 0       | NE | 0       | NE | 0     | NE |
| M5005_Spy_0348  | nrdI   | 354886 | 355374 | 162  | 0       | NE | 0       | NE | 0     | NE |
| M5005_Spy_0349  | nrdE.1 | 355341 | 357521 | 726  | 0       | NE | 0       | NE | 0     | NE |
| M5005_Spy_0350  | -      | 357500 | 357718 | 72   | -1      | S  | -1      | S  | -1    | S  |
| M5005_Spy_0351c | spyA   | 357724 | 358476 | 250  | 0       | NE | 0       | NE | 0     | NE |
| M5005_Spy_0352  | -      | 358935 | 359471 | 178  | 0       | NE | 0       | NE | 0     | NE |
| M5005_Spy_0353  | -      | 359613 | 359996 | 127  | 0.00025 | NE | 0       | NE | 0     | NE |
| M5005_Spy_0354c | -      | 360090 | 360722 | 210  | 0       | NE | 0       | NE | 0     | NE |
| M5005_Spy_0355  | -      | 361401 | 361721 | 106  | 0       | NE | 0       | NE | 0     | NE |
| M5005_Spy_0356c | speJ   | 362034 | 362732 | 232  | 0       | NE | 0       | NE | 0     | NE |
| M5005_Spy_0357c | -      | 362980 | 363594 | 204  | 0.00025 | NE | 0       | NE | 0     | NE |
| M5005_Spy_0358  | -      | 363955 | 364191 | 78   | 0       | NE | 0       | NE | 0     | NE |
| M5005_Spy_0359  | fabG   | 364175 | 364882 | 235  | 0       | NE | 0       | NE | 0     | NE |
| M5005_Spy_0360  | -      | 364928 | 365917 | 329  | 0       | NE | 0       | NE | 0     | NE |
| M5005_Spy_0361  | glpT   | 366250 | 367587 | 445  | 0       | NE | 0       | NE | 0     | NE |
| M5005_Spy_0362  | glmU   | 367760 | 369142 | 460  | 1       | E  | 1       | E  | 1     | E  |
| M5005_Spy_0363  | -      | 369173 | 369727 | 184  | 0.00025 | NE | 0       | NE | 0     | NE |
| M5005_Spy_0364  | -      | 369727 | 369978 | 83   | 0.07725 | U  | 0       | NE | 0     | NE |
| M5005_Spy_0365  | pfs    | 369998 | 370693 | 231  | 0.0005  | NE | 1       | E  | 1     | E  |
| M5005_Spy_0366  | -      | 370844 | 371185 | 113  | 0       | NE | 0       | NE | 0     | NE |
| M5005_Spy_0367c | mtsR   | 371286 | 371933 | 215  | 0       | NE | 0       | NE | 0.235 | U  |
| M5005_Spy_0368  | mtsA   | 372091 | 373011 | 306  | 0       | NE | 0       | NE | 0     | NE |
| M5005_Spy_0369  | mtsB   | 373075 | 373800 | 241  | 0       | NE | 0       | NE | 0     | NE |
| M5005_Spy_0370  | mtsC   | 373801 | 374655 | 284  | 0       | NE | 0       | NE | 0     | NE |
| M5005_Spy_0371c | cypB   | 374803 | 375609 | 268  | 0       | NE | 0       | NE | 0     | NE |
| M5005_Spy_0372  | ftsK   | 375826 | 378231 | 801  | 1       | E  | 1       | E  | 1     | E  |
| M5005_Spy_0373c | -      | 378301 | 378654 | 117  | 0       | NE | 0       | NE | 0     | NE |
| M5005_Spy_0374  | rplK   | 378898 | 379323 | 141  | 0.9995  | E  | 1       | E  | 0.926 | U  |
| M5005_Spy_0375  | rplA   | 379429 | 380118 | 229  | 0.9995  | E  | 1       | E  | 1     | E  |
| M5005_Spy_0376  | -      | 380469 | 381602 | 377  | 0       | NE | 0       | NE | 0     | NE |
| M5005_Spy_0377  | pyrH   | 381767 | 381937 | 56   | 1       | E  | 1       | E  | 1     | E  |



|                 |           |        |        |      |         |    |         |    |       |    |
|-----------------|-----------|--------|--------|------|---------|----|---------|----|-------|----|
| M5005_Spy_0380  | frr       | 382524 | 383081 | 185  | 0.9895  | U  | 1       | E  | 0.997 | E  |
| M5005_Spy_0381  | -         | 383190 | 384047 | 285  | 0.00025 | NE | 0       | NE | 0     | NE |
| M5005_Spy_0382  | msrA.2    | 384120 | 384629 | 169  | 0       | NE | 0       | NE | 0     | NE |
| M5005_Spy_0383  | -         | 384626 | 384841 | 71   | 0       | NE | 0       | NE | 0     | NE |
| M5005_Spy_0384  | -         | 384997 | 386166 | 389  | 0       | NE | 0       | NE | 0     | NE |
| M5005_Spy_0385  | -         | 386441 | 388252 | 603  | 0       | NE | 0       | NE | 0     | NE |
| M5005_Spy_0386  | phoH      | 388411 | 389463 | 350  | 0       | NE | 0       | NE | 0     | NE |
| M5005_Spy_0387  | -         | 389509 | 390084 | 191  | 0       | NE | 0       | NE | 0     | NE |
| M5005_Spy_0388  | -         | 390192 | 390740 | 182  | 0.00025 | NE | 0.999   | E  | 1     | E  |
| M5005_Spy_0389  | dgk       | 390721 | 391128 | 135  | 0.0265  | NE | 1       | E  | 1     | E  |
| M5005_Spy_0390  | era       | 391248 | 392144 | 298  | 0.6295  | U  | 0.469   | U  | 1     | E  |
| M5005_Spy_0391  | -         | 392128 | 392640 | 170  | 0       | NE | 0       | NE | 0     | NE |
| M5005_Spy_0392c | -         | 392945 | 393199 | 84   | 0       | NE | 0       | NE | 0     | NE |
| M5005_Spy_0393  | -         | 393597 | 393842 | 81   | 0       | NE | 0       | NE | 0     | NE |
| M5005_Spy_0394  | -         | 393857 | 394039 | 60   | 0       | NE | 0       | NE | 0     | NE |
| M5005_Spy_0395c | -         | 394230 | 394409 | 59   | 0       | NE | 0       | NE | 0     | NE |
| M5005_Spy_0396c | -         | 394348 | 394497 | 49   | -1      | S  | -1      | S  | -1    | S  |
| M5005_Spy_0397c | -         | 394494 | 394916 | 140  | 0       | NE | 0       | NE | 0     | NE |
| M5005_Spy_0398  | -         | 395189 | 395398 | 69   | 0       | NE | 0       | NE | 0     | NE |
| M5005_Spy_0399  | -         | 395463 | 395663 | 66   | 0       | NE | 0       | NE | 0     | NE |
| M5005_Spy_0400  | silD      | 395957 | 396151 | 64   | 0       | NE | 0       | NE | 0     | NE |
| M5005_Spy_0401c | -         | 396344 | 396460 | 38   | -1      | S  | -1      | S  | -1    | S  |
| M5005_Spy_0402  | -         | 396644 | 397639 | 331  | 0       | NE | 0       | NE | 0     | NE |
| M5005_Spy_0403  | -         | 397684 | 398130 | 148  | 0       | NE | 0       | NE | 0     | NE |
| M5005_Spy_0404c | -         | 398478 | 398747 | 89   | 0       | NE | 0       | NE | 0     | NE |
| M5005_Spy_0405  | -         | 398948 | 399055 | 35   | -1      | S  | -1      | S  | -1    | S  |
| M5005_Spy_0406c | -         | 399269 | 399511 | 80   | 0       | NE | 0       | NE | 0     | NE |
| M5005_Spy_0407  | mutR      | 399818 | 400684 | 288  | 0       | NE | 0       | NE | 0     | NE |
| M5005_Spy_0408  | fpg       | 400856 | 401683 | 275  | 0       | NE | 0       | NE | 0     | NE |
| M5005_Spy_0409  | coaE      | 401593 | 402273 | 226  | 1       | E  | 1       | E  | 1     | E  |
| M5005_Spy_0410  | -         | 402463 | 403965 | 500  | 0       | NE | 0       | NE | 0     | NE |
| M5005_Spy_0411  | -         | 404087 | 405280 | 397  | 0       | NE | 0       | NE | 0     | NE |
| M5005_Spy_0412  | rpmG      | 405277 | 405423 | 48   | -1      | S  | -1      | S  | -1    | S  |
| M5005_Spy_0413  | secG      | 405469 | 405705 | 78   | 0.9975  | E  | 1       | E  | 1     | E  |
| M5005_Spy_0414  | -         | 405802 | 408132 | 776  | 0       | NE | 0       | NE | 0     | NE |
| M5005_Spy_0415  | smpB      | 408135 | 408602 | 155  | 0.00025 | NE | 0       | NE | 0.262 | U  |
| M5005_Spy_0416  | -         | 408617 | 409327 | 236  | 0       | NE | 0       | NE | 0     | NE |
| M5005_Spy_0417c | pcp       | 409443 | 410090 | 215  | 0       | NE | 0       | NE | 0     | NE |
| M5005_Spy_0418c | -         | 410140 | 411066 | 308  | 0       | NE | 0       | NE | 0     | NE |
| M5005_Spy_0419c | -         | 411066 | 411749 | 227  | 0.00025 | NE | 0       | NE | 0.001 | NE |
| M5005_Spy_0420c | -         | 411960 | 412886 | 308  | 0       | NE | 0       | NE | 0     | NE |
| M5005_Spy_0421c | gloA      | 413031 | 413408 | 125  | 0.00025 | NE | 0       | NE | 0     | NE |
| M5005_Spy_0422c | -         | 413419 | 414084 | 221  | 0       | NE | 0       | NE | 0     | NE |
| M5005_Spy_0423c | pepQ      | 414133 | 415218 | 361  | 0.00225 | NE | 0       | NE | 0     | NE |
| M5005_Spy_0424  | ccpA      | 415392 | 416393 | 333  | 0.99075 | U  | 0.00025 | NE | 0.075 | U  |
| M5005_Spy_0425  | -         | 416524 | 417522 | 332  | 0.00025 | NE | 0.5615  | U  | 1     | E  |
| M5005_Spy_0426  | -         | 417524 | 418858 | 444  | 0.98575 | U  | 1       | E  | 1     | E  |
| M5005_Spy_0427  | thrS      | 419280 | 421223 | 647  | 1       | E  | 1       | E  | 1     | E  |
| M5005_Spy_0428  | drrA/tagH | 421364 | 422356 | 330  | 0       | NE | 0       | NE | 0     | NE |
| M5005_Spy_0429  | -         | 422358 | 423176 | 272  | 0       | NE | 0       | NE | 0     | NE |
| M5005_Spy_0430  | -         | 423178 | 423963 | 261  | 0       | NE | 0       | NE | 0     | NE |
| M5005_Spy_0431  | -         | 424164 | 424313 | 49   | -1      | S  | -1      | S  | -1    | S  |
| M5005_Spy_0432  | -         | 424708 | 425856 | 382  | 0       | NE | 0       | NE | 0     | NE |
| M5005_Spy_0433  | -         | 425813 | 427060 | 415  | 0       | NE | 0       | NE | 0     | NE |
| M5005_Spy_0434  | -         | 427116 | 428150 | 344  | 0       | NE | 0       | NE | 0     | NE |
| M5005_Spy_0435  | vicR      | 428312 | 429022 | 236  | 1       | E  | 0.99975 | E  | 1     | E  |
| M5005_Spy_0436  | vicK      | 429015 | 430367 | 450  | 0.00025 | NE | 0       | NE | 0.001 | NE |
| M5005_Spy_0437  | vicX      | 430371 | 431180 | 269  | 0       | NE | 0       | NE | 0     | NE |
| M5005_Spy_0438  | rnc       | 431624 | 432316 | 230  | 0.00025 | NE | 0       | NE | 1     | E  |
| M5005_Spy_0439  | smc       | 432317 | 435856 | 1179 | 0       | NE | 0       | NE | 0     | NE |
| M5005_Spy_0440c | -         | 436109 | 436960 | 283  | 0       | NE | 0       | NE | 0     | NE |
| M5005_Spy_0441  | aroE      | 437234 | 438106 | 290  | 0       | NE | 0       | NE | 0     | NE |
| M5005_Spy_0442  | -         | 438205 | 438939 | 244  | 0       | NE | 0       | NE | 0.001 | NE |

|                 |           |        |        |     |         |    |         |    |       |    |
|-----------------|-----------|--------|--------|-----|---------|----|---------|----|-------|----|
| M5005_Spy_0443  | -         | 438941 | 439675 | 244 | 0       | NE | 0       | NE | 0     | NE |
| M5005_Spy_0444  | -         | 439668 | 440654 | 328 | 0       | NE | 0       | NE | 0     | NE |
| M5005_Spy_0445  | metK1     | 440664 | 441863 | 399 | 0       | NE | 0       | NE | 0     | NE |
| M5005_Spy_0446  | -         | 441847 | 442815 | 322 | 0.00025 | NE | 0       | NE | 0     | NE |
| M5005_Spy_0447  | -         | 442870 | 443859 | 329 | 0       | NE | 0       | NE | 0     | NE |
| M5005_Spy_0448  | -         | 444385 | 444528 | 47  | -1      | S  | -1      | S  | -1    | S  |
| M5005_Spy_0449  | hasB.2    | 444552 | 445709 | 385 | 0.00025 | NE | 0       | NE | 0     | NE |
| M5005_Spy_0450  | mefE      | 445794 | 447002 | 402 | 0       | NE | 0       | NE | 0     | NE |
| M5005_Spy_0451c | -         | 447105 | 447314 | 69  | 0       | NE | 0       | NE | 0     | NE |
| M5005_Spy_0452c | -         | 447304 | 448149 | 281 | 0       | NE | 0       | NE | 0     | NE |
| M5005_Spy_0453c | -         | 448234 | 448962 | 242 | 0       | NE | 0       | NE | 0     | NE |
| M5005_Spy_0454c | -         | 448953 | 449177 | 74  | 0.00025 | NE | 0       | NE | 0     | NE |
| M5005_Spy_0455c | -         | 449177 | 450271 | 364 | 0       | NE | 0       | NE | 0     | NE |
| M5005_Spy_0456  | -         | 450317 | 450619 | 100 | 0.07525 | U  | 0.00025 | NE | 0.606 | U  |
| M5005_Spy_0457  | -         | 450619 | 450924 | 101 | 0       | NE | 0       | NE | 0     | NE |
| M5005_Spy_0458  | -         | 450943 | 451215 | 90  | 0       | NE | 0       | NE | 0     | NE |
| M5005_Spy_0459  | -         | 451320 | 451772 | 150 | 0.00025 | NE | 0       | NE | 0     | NE |
| M5005_Spy_0460  | -         | 451838 | 452152 | 104 | 0       | NE | 0       | NE | 0     | NE |
| M5005_Spy_0461  | -         | 452569 | 452907 | 112 | 0.00025 | NE | 0       | NE | 0     | NE |
| M5005_Spy_0462  | -         | 452931 | 453755 | 274 | 0       | NE | 0       | NE | 0     | NE |
| M5005_Spy_0463  | -         | 453769 | 455016 | 415 | 0       | NE | 0       | NE | 0     | NE |
| M5005_Spy_0464  | mccF      | 455244 | 455960 | 238 | 0       | NE | 0       | NE | 0     | NE |
| M5005_Spy_0465  | -         | 455973 | 456173 | 66  | 0.017   | NE | 0       | NE | 0     | NE |
| M5005_Spy_0466  | -         | 456293 | 457192 | 299 | 0       | NE | 0       | NE | 0     | NE |
| M5005_Spy_0467c | -         | 457645 | 458358 | 237 | 0       | NE | 0       | NE | 0     | NE |
| M5005_Spy_0468c | -         | 458406 | 458681 | 91  | 0.00825 | NE | 0       | NE | 0     | NE |
| M5005_Spy_0469  | -         | 458701 | 458919 | 72  | 0.00025 | NE | 0       | NE | 0     | NE |
| M5005_Spy_0470  | -         | 458986 | 459783 | 265 | 0       | NE | 0       | NE | 0     | NE |
| M5005_Spy_0471  | -         | 459787 | 460611 | 274 | 0       | NE | 0       | NE | 0     | NE |
| M5005_Spy_0472  | ftsY      | 460611 | 462161 | 516 | 0.99775 | E  | 1       | E  | 1     | E  |
| M5005_Spy_0473c | -         | 462215 | 463582 | 455 | 0       | NE | 0       | NE | 0     | NE |
| M5005_Spy_0474  | licT/bgIG | 463910 | 464752 | 280 | 0       | NE | 0       | NE | 0     | NE |
| M5005_Spy_0475  | -         | 464916 | 466616 | 566 | 0       | NE | 0       | NE | 0     | NE |
| M5005_Spy_0476  | bgIA      | 466635 | 468059 | 474 | 0       | NE | 0       | NE | 0     | NE |
| M5005_Spy_0477c | -         | 468158 | 468973 | 271 | 0       | NE | 0       | NE | 0     | NE |
| M5005_Spy_0478c | -         | 468973 | 469875 | 300 | 0       | NE | 0       | NE | 0     | NE |
| M5005_Spy_0479  | -         | 470009 | 470206 | 65  | 0       | NE | 0       | NE | 0     | NE |
| M5005_Spy_0480  | -         | 470304 | 470432 | 42  | 0       | NE | 0       | NE | 0.001 | NE |
| M5005_Spy_0481c | -         | 470412 | 472544 | 710 | -1      | S  | -1      | S  | -1    | S  |
| M5005_Spy_0482  | -         | 472486 | 472968 | 160 | 0       | NE | 0       | NE | 0     | NE |
| M5005_Spy_0483  | -         | 473032 | 473304 | 90  | 0       | NE | 0       | NE | 0     | NE |
| M5005_Spy_0484  | ptsK      | 473609 | 474601 | 330 | 0.012   | NE | 1       | E  | 1     | E  |
| M5005_Spy_0485  | lgt       | 474598 | 475377 | 259 | 0.00025 | NE | 0       | NE | 0     | NE |
| M5005_Spy_0486  | -         | 475399 | 475806 | 135 | 0       | NE | 0       | NE | 0     | NE |
| M5005_Spy_0487  | -         | 475799 | 476227 | 142 | 0       | NE | 0       | NE | 0     | NE |
| M5005_Spy_0488c | -         | 476386 | 476670 | 94  | 0.00025 | NE | 0       | NE | 0.001 | NE |
| M5005_Spy_0489  | -         | 476869 | 477237 | 122 | 0       | NE | 0       | NE | 0     | NE |
| M5005_Spy_0491  | -         | 477887 | 479173 | 428 | 0       | NE | 0       | NE | 0     | NE |
| M5005_Spy_0492c | -         | 479186 | 479314 | 42  | -1      | S  | -1      | S  | -1    | S  |
| M5005_Spy_0493  | -         | 479383 | 479595 | 70  | 0       | NE | 0       | NE | 0     | NE |
| M5005_Spy_0494c | -         | 479692 | 479832 | 46  | -1      | S  | -1      | S  | -1    | S  |
| M5005_Spy_0495c | lysS      | 479968 | 481461 | 497 | 1       | E  | 1       | E  | 1     | E  |
| M5005_Spy_0496  | -         | 481635 | 482537 | 300 | 0.00025 | NE | 0       | NE | 0     | NE |
| M5005_Spy_0497c | -         | 482645 | 483268 | 207 | 0       | NE | 0       | NE | 0     | NE |
| M5005_Spy_0498c | -         | 483609 | 484088 | 159 | 0       | NE | 0       | NE | 0     | NE |
| M5005_Spy_0499c | -         | 484179 | 484742 | 187 | 0       | NE | 0       | NE | 0     | NE |
| M5005_Spy_0500c | -         | 485011 | 485859 | 282 | 0.00025 | NE | 0       | NE | 1     | E  |
| M5005_Spy_0501  | -         | 486184 | 486687 | 167 | 0       | NE | 0       | NE | 0     | NE |
| M5005_Spy_0502  | -         | 486671 | 487057 | 128 | 0.00025 | NE | 0       | NE | 0     | NE |
| M5005_Spy_0503c | -         | 487103 | 487582 | 159 | 0       | NE | 0       | NE | 0     | NE |
| M5005_Spy_0504c | pepF      | 487575 | 489374 | 599 | 0       | NE | 0       | NE | 0     | NE |
| M5005_Spy_0505  | ppc       | 489518 | 492331 | 937 | 0       | NE | 0       | NE | 0     | NE |
| M5005_Spy_0506  | ftsW      | 492501 | 493775 | 424 | 1       | E  | 1       | E  | 1     | E  |

|                 |       |        |        |      |         |    |         |    |       |    |
|-----------------|-------|--------|--------|------|---------|----|---------|----|-------|----|
| M5005_Spy_0507c | -     | 493792 | 493932 | 46   | -1      | S  | -1      | S  | -1    | S  |
| M5005_Spy_0508  | tuf   | 494129 | 495325 | 398  | 1       | E  | 1       | E  | 1     | E  |
| M5005_Spy_0509  | tpiA  | 495566 | 496324 | 252  | 0.97425 | U  | 0.98925 | U  | 1     | E  |
| M5005_Spy_0510c | murN  | 496423 | 497658 | 411  | 1       | E  | 1       | E  | 1     | E  |
| M5005_Spy_0511c | murM  | 497645 | 498871 | 408  | 1       | E  | 1       | E  | 1     | E  |
| M5005_Spy_0512c | -     | 498871 | 499680 | 269  | 0       | NE | 0       | NE | 0     | NE |
| M5005_Spy_0513c | -     | 499831 | 500064 | 77   | 0       | NE | 0.84975 | U  | 0.584 | U  |
| M5005_Spy_0514c | -     | 500136 | 501437 | 433  | 0       | NE | 0       | NE | 0     | NE |
| M5005_Spy_0515  | -     | 501519 | 501905 | 128  | 0       | NE | 0       | NE | 0     | NE |
| M5005_Spy_0516  | pacL  | 502136 | 504817 | 893  | 1       | E  | 1       | E  | 1     | E  |
| M5005_Spy_0517c | regR  | 504901 | 505896 | 331  | 0       | NE | 0       | NE | 0     | NE |
| M5005_Spy_0518c | -     | 505960 | 507867 | 635  | 0       | NE | 0       | NE | 0     | NE |
| M5005_Spy_0519c | agaD  | 507954 | 508775 | 273  | 0       | NE | 0       | NE | 0     | NE |
| M5005_Spy_0520c | agaW  | 508762 | 509544 | 260  | 0       | NE | 0       | NE | 0     | NE |
| M5005_Spy_0521c | agaV  | 509563 | 510051 | 162  | 0.00025 | NE | 0       | NE | 0     | NE |
| M5005_Spy_0522c | ugl   | 510087 | 511286 | 399  | 0.00025 | NE | 0       | NE | 0.001 | NE |
| M5005_Spy_0523  | -     | 511353 | 511883 | 176  | 0       | NE | 0       | NE | 0     | NE |
| M5005_Spy_0524  | idnO  | 512059 | 512853 | 264  | 0       | NE | 0       | NE | 0     | NE |
| M5005_Spy_0525  | -     | 512878 | 513519 | 213  | 0       | NE | 0       | NE | 0     | NE |
| M5005_Spy_0526  | kdgK  | 513548 | 514549 | 333  | 0       | NE | 0       | NE | 0     | NE |
| M5005_Spy_0527  | kgdA  | 514554 | 515189 | 211  | 0       | NE | 0       | NE | 0     | NE |
| M5005_Spy_0528  | -     | 515485 | 516135 | 216  | 0       | NE | 0       | NE | 0.001 | NE |
| M5005_Spy_0529  | -     | 516776 | 517951 | 391  | 0.00025 | NE | 0       | NE | 0     | NE |
| M5005_Spy_0530  | prfB  | 518105 | 519118 | 337  | 0.02825 | NE | 1       | E  | 1     | E  |
| M5005_Spy_0531  | ftsE  | 519137 | 519829 | 230  | 0.00025 | NE | 0.974   | U  | 0.091 | U  |
| M5005_Spy_0532  | ftsX  | 519822 | 520751 | 309  | 0.0005  | NE | 0.985   | U  | 1     | E  |
| M5005_Spy_0533c | -     | 521061 | 521696 | 211  | 0.00025 | NE | 0       | NE | 0     | NE |
| M5005_Spy_0534  | -     | 521927 | 522541 | 204  | 0       | NE | 0       | NE | 0     | NE |
| M5005_Spy_0535  | -     | 522545 | 522691 | 48   | -1      | S  | -1      | S  | -1    | S  |
| M5005_Spy_0536  | dinG  | 522841 | 525300 | 819  | 0       | NE | 0       | NE | 0     | NE |
| M5005_Spy_0537  | aspC  | 525635 | 526828 | 397  | 0.00025 | NE | 0       | NE | 0     | NE |
| M5005_Spy_0538  | asnC  | 526849 | 528195 | 448  | 1       | E  | 1       | E  | 1     | E  |
| M5005_Spy_0539  | -     | 528609 | 529499 | 296  | 0.00025 | NE | 0       | NE | 0.001 | NE |
| M5005_Spy_0540  | -     | 529496 | 530473 | 325  | 0       | NE | 0       | NE | 0     | NE |
| M5005_Spy_0541  | -     | 530470 | 531381 | 303  | 0.00025 | NE | 0       | NE | 0.01  | NE |
| M5005_Spy_0542  | pepD  | 531514 | 532911 | 465  | 0       | NE | 0       | NE | 0     | NE |
| M5005_Spy_0543  | adcA  | 533063 | 534610 | 515  | 0       | NE | 0       | NE | 0     | NE |
| M5005_Spy_0544  | -     | 534758 | 535480 | 240  | 0       | NE | 0       | NE | 0     | NE |
| M5005_Spy_0545  | agaS  | 535499 | 536698 | 399  | 0       | NE | 0       | NE | 0     | NE |
| M5005_Spy_0546c | rpmE2 | 536795 | 537055 | 86   | 0.9685  | U  | 0       | NE | 0.998 | E  |
| M5005_Spy_0547c | -     | 537170 | 538111 | 313  | 0.00025 | NE | 0.00225 | NE | 0.757 | U  |
| M5005_Spy_0548  | flaV  | 538505 | 538954 | 149  | 0.0005  | NE | 0       | NE | 1     | E  |
| M5005_Spy_0549  | -     | 539130 | 539414 | 94   | 0       | NE | 0       | NE | 0     | NE |
| M5005_Spy_0550  | -     | 539407 | 540669 | 420  | 0       | NE | 0       | NE | 0.001 | NE |
| M5005_Spy_0551  | rplS  | 540784 | 541131 | 115  | 0.822   | U  | 1       | E  | 0.985 | U  |
| M5005_Spy_0552  | -     | 542134 | 542703 | 189  | 0.002   | NE | 0       | NE | 0.001 | NE |
| M5005_Spy_0553  | gyrB  | 542704 | 544656 | 650  | 1       | E  | 1       | E  | 1     | E  |
| M5005_Spy_0554  | ezrA  | 545024 | 546748 | 574  | 0.9785  | U  | 1       | E  | 1     | E  |
| M5005_Spy_0555c | -     | 546880 | 547338 | 152  | 0       | NE | 0       | NE | 0     | NE |
| M5005_Spy_0556  | eno   | 547565 | 548872 | 435  | 1       | E  | 1       | E  | 1     | E  |
| M5005_Spy_0557c | -     | 549398 | 549988 | 196  | 0       | NE | 0       | NE | 0     | NE |
| M5005_Spy_0558c | -     | 550037 | 550288 | 83   | 0       | NE | 0       | NE | 0     | NE |
| M5005_Spy_0559c | -     | 550650 | 551306 | 218  | 0       | NE | 0       | NE | 0     | NE |
| M5005_Spy_0560c | -     | 551303 | 552190 | 295  | 0.00025 | NE | 0       | NE | 0     | NE |
| M5005_Spy_0561  | epf   | 552662 | 558841 | 2059 | 0       | NE | 0       | NE | 0     | NE |
| M5005_Spy_0562  | sagA  | 559706 | 559867 | 53   | 0       | NE | 0       | NE | 0     | NE |
| M5005_Spy_0563  | sagB  | 560089 | 561039 | 316  | 0       | NE | 0       | NE | 0     | NE |
| M5005_Spy_0564  | sagC  | 561036 | 562094 | 352  | 0       | NE | 0       | NE | 0     | NE |
| M5005_Spy_0565  | sagD  | 562114 | 563472 | 452  | 0       | NE | 0       | NE | 0     | NE |
| M5005_Spy_0566  | sagE  | 563447 | 564118 | 223  | 0       | NE | 0       | NE | 0     | NE |
| M5005_Spy_0567  | sagF  | 564115 | 564798 | 227  | 0       | NE | 0       | NE | 0     | NE |
| M5005_Spy_0568  | sagG  | 564821 | 565744 | 307  | 0.00025 | NE | 0       | NE | 0.003 | NE |
| M5005_Spy_0569  | sagH  | 565753 | 566880 | 375  | 0.00025 | NE | 0       | NE | 0.001 | NE |

|                 |        |        |        |      |         |    |         |    |       |    |
|-----------------|--------|--------|--------|------|---------|----|---------|----|-------|----|
| M5005_Spy_0570  | sagI   | 566877 | 567995 | 372  | 0       | NE | 0       | NE | 0.001 | NE |
| M5005_Spy_0571  | -      | 568566 | 571298 | 910  | 0.00025 | NE | 0       | NE | 0     | NE |
| M5005_Spy_0572  | -      | 571576 | 572076 | 166  | 0       | NE | 0       | NE | 0     | NE |
| M5005_Spy_0573  | ligA   | 572270 | 574228 | 652  | 1       | E  | 1       | E  | 1     | E  |
| M5005_Spy_0574  | -      | 574242 | 575264 | 340  | 1       | E  | 1       | E  | 1     | E  |
| M5005_Spy_0575  | atpE   | 575657 | 575854 | 65   | 0.88075 | U  | 0.02675 | NE | 0.989 | U  |
| M5005_Spy_0576  | atpB   | 575889 | 576605 | 238  | 1       | E  | 1       | E  | 0.007 | NE |
| M5005_Spy_0577  | atpF   | 576623 | 577117 | 164  | 0.108   | U  | 1       | E  | 1     | E  |
| M5005_Spy_0578  | atpH   | 577117 | 577653 | 178  | 1       | E  | 1       | E  | 1     | E  |
| M5005_Spy_0579  | atpA   | 577669 | 579177 | 502  | 1       | E  | 1       | E  | 1     | E  |
| M5005_Spy_0580  | atpG   | 579193 | 580068 | 291  | 0.9815  | U  | 1       | E  | 1     | E  |
| M5005_Spy_0581  | atpD   | 580230 | 581636 | 468  | 1       | E  | 1       | E  | 1     | E  |
| M5005_Spy_0582  | atpC   | 581649 | 582065 | 138  | 0.4415  | U  | 0.80875 | U  | 0.991 | U  |
| M5005_Spy_0583  | -      | 582331 | 582588 | 85   | 0       | NE | 0       | NE | 0     | NE |
| M5005_Spy_0584  | murA   | 582815 | 583924 | 369  | 0       | NE | 0       | NE | 0     | NE |
| M5005_Spy_0585  | epuA   | 583928 | 584116 | 62   | 0       | NE | 0       | NE | 0     | NE |
| M5005_Spy_0586  | endA   | 584152 | 584691 | 179  | 0       | NE | 0       | NE | 0     | NE |
| M5005_Spy_0587  | pheS   | 584974 | 586017 | 347  | 1       | E  | 1       | E  | 1     | E  |
| M5005_Spy_0588  | pheT   | 586212 | 588632 | 806  | 1       | E  | 1       | E  | 1     | E  |
| M5005_Spy_0589  | -      | 588742 | 589119 | 125  | 0       | NE | 0       | NE | 0     | NE |
| M5005_Spy_0590  | -      | 589112 | 589498 | 128  | 0       | NE | 0       | NE | 0     | NE |
| M5005_Spy_0591  | -      | 589571 | 590647 | 358  | 0       | NE | 0       | NE | 0     | NE |
| M5005_Spy_0592  | -      | 590657 | 591325 | 222  | 0       | NE | 0       | NE | 0     | NE |
| M5005_Spy_0593c | -      | 591427 | 592344 | 305  | 0       | NE | 0       | NE | 0     | NE |
| M5005_Spy_0594  | rexB   | 592495 | 595710 | 1071 | 0.82275 | U  | 0       | NE | 0.818 | U  |
| M5005_Spy_0595  | rexA   | 595671 | 599339 | 1222 | 0.00025 | NE | 0       | NE | 1     | E  |
| M5005_Spy_0596  | -      | 599479 | 600291 | 270  | 0       | NE | 0       | NE | 0     | NE |
| M5005_Spy_0597  | rpsU   | 600432 | 600608 | 58   | 0.99425 | U  | 1       | E  | 1     | E  |
| M5005_Spy_0598c | mscL   | 600736 | 601098 | 120  | 0       | NE | 0       | NE | 0     | NE |
| M5005_Spy_0599  | dnaG   | 601229 | 603043 | 604  | 1       | E  | 1       | E  | 1     | E  |
| M5005_Spy_0600  | rpoD   | 603052 | 604161 | 369  | 1       | E  | 1       | E  | 1     | E  |
| M5005_Spy_0601  | -      | 604397 | 604735 | 112  | 0       | NE | 0       | NE | 0     | NE |
| M5005_Spy_0602  | rmlD   | 604873 | 605727 | 284  | 1       | E  | 1       | E  | 0.999 | E  |
| M5005_Spy_0603  | rgpAc  | 605846 | 607000 | 384  | 0.0005  | NE | 1       | E  | 1     | E  |
| M5005_Spy_0604  | rgpBc  | 606990 | 607922 | 310  | 0.942   | U  | 1       | E  | 1     | E  |
| M5005_Spy_0605  | rgpCc  | 607925 | 608728 | 267  | 0.99925 | E  | 1       | E  | 1     | E  |
| M5005_Spy_0606  | rgpDc  | 608728 | 609933 | 401  | 0.9975  | E  | 0.999   | E  | 1     | E  |
| M5005_Spy_0607  | rgpEc  | 609958 | 610965 | 335  | 1       | E  | 1       | E  | 1     | E  |
| M5005_Spy_0608  | rgpFc  | 610962 | 612707 | 581  | 1       | E  | 1       | E  | 1     | E  |
| M5005_Spy_0609  | -      | 612704 | 615178 | 824  | 0.00025 | NE | 0       | NE | 0     | NE |
| M5005_Spy_0610  | -      | 615357 | 616052 | 231  | 0       | NE | 0       | NE | 0     | NE |
| M5005_Spy_0611  | -      | 616054 | 616395 | 113  | 0       | NE | 0       | NE | 0     | NE |
| M5005_Spy_0612  | amrA   | 616388 | 617674 | 428  | 0.00025 | NE | 0.00025 | NE | 1     | E  |
| M5005_Spy_0613  | -      | 617655 | 619151 | 498  | 0.00025 | NE | 1       | E  | 1     | E  |
| M5005_Spy_0614  | pepT   | 619245 | 620468 | 407  | 0       | NE | 0       | NE | 0     | NE |
| M5005_Spy_0615  | ebsA   | 620509 | 620997 | 162  | 0       | NE | 0       | NE | 0     | NE |
| M5005_Spy_0616c | -      | 620984 | 621181 | 65   | 0       | NE | 0       | NE | 0     | NE |
| M5005_Spy_0617  | -      | 621230 | 621706 | 158  | 0.00025 | NE | 0       | NE | 0.302 | U  |
| M5005_Spy_0618  | cmk    | 621721 | 622401 | 226  | 0.0005  | NE | 0.98775 | U  | 0.997 | E  |
| M5005_Spy_0619  | infC   | 622563 | 623093 | 176  | 0.995   | U  | 0.99175 | U  | 1     | E  |
| M5005_Spy_0620  | rpmI   | 623135 | 623332 | 65   | 0.0065  | NE | 0.00925 | NE | 0.995 | E  |
| M5005_Spy_0621  | rplT   | 623391 | 623750 | 119  | 0.00025 | NE | 0.99975 | E  | 0.008 | NE |
| M5005_Spy_0622c | -      | 624041 | 626212 | 723  | 1       | E  | 1       | E  | 1     | E  |
| M5005_Spy_0623  | -      | 626359 | 627522 | 387  | 0       | NE | 0       | NE | 0     | NE |
| M5005_Spy_0624  | aroD   | 627519 | 628205 | 228  | 0       | NE | 0       | NE | 0     | NE |
| M5005_Spy_0625  | aroF   | 628299 | 629465 | 388  | 0       | NE | 0       | NE | 0     | NE |
| M5005_Spy_0626  | -      | 629526 | 629867 | 113  | 0.00025 | NE | 0       | NE | 0     | NE |
| M5005_Spy_0627  | gor    | 630088 | 631440 | 450  | 0       | NE | 0       | NE | 0     | NE |
| M5005_Spy_0628c | folC.2 | 631528 | 632796 | 422  | 0       | NE | 0       | NE | 0     | NE |
| M5005_Spy_0629c | -      | 632826 | 633266 | 146  | 0       | NE | 0       | NE | 0     | NE |
| M5005_Spy_0630  | nifS1  | 633501 | 634643 | 380  | 0       | NE | 0       | NE | 0     | NE |
| M5005_Spy_0631  | thiI   | 634655 | 635869 | 404  | 0       | NE | 0       | NE | 0     | NE |
| M5005_Spy_0632  | capA   | 635907 | 637199 | 430  | 0       | NE | 0       | NE | 0     | NE |

|                 |        |        |        |      |         |    |         |    |       |    |
|-----------------|--------|--------|--------|------|---------|----|---------|----|-------|----|
| M5005_Spy_0633  | rplU   | 637413 | 637727 | 104  | 0.00025 | NE | 0.62425 | U  | 0.081 | U  |
| M5005_Spy_0634  | -      | 637739 | 638065 | 108  | 0.58675 | U  | 0.0325  | NE | 0.002 | NE |
| M5005_Spy_0635  | rpmA   | 638093 | 638386 | 97   | 0.99825 | E  | 0.029   | NE | 0.003 | NE |
| M5005_Spy_0636  | -      | 638734 | 639648 | 304  | 0.00025 | NE | 0       | NE | 0     | NE |
| M5005_Spy_0637  | lsp    | 639645 | 640103 | 152  | 0       | NE | 0       | NE | 0     | NE |
| M5005_Spy_0638  | -      | 640093 | 640983 | 296  | 0       | NE | 0       | NE | 0     | NE |
| M5005_Spy_0639  | pyrR   | 641379 | 641900 | 173  | 0.00025 | NE | 0       | NE | 0     | NE |
| M5005_Spy_0640  | pyrP   | 641916 | 643175 | 419  | 0.00025 | NE | 0       | NE | 0     | NE |
| M5005_Spy_0641  | pyrB   | 643236 | 644171 | 311  | 0.00275 | NE | 0       | NE | 0     | NE |
| M5005_Spy_0642  | carA   | 644215 | 645297 | 360  | 0       | NE | 0       | NE | 0     | NE |
| M5005_Spy_0643  | carB   | 645523 | 648699 | 1058 | 0.00025 | NE | 0       | NE | 0     | NE |
| M5005_Spy_0644  | -      | 648999 | 650177 | 392  | 0       | NE | 0       | NE | 0     | NE |
| M5005_Spy_0645  | -      | 650177 | 650887 | 236  | 0       | NE | 0       | NE | 0     | NE |
| M5005_Spy_0646  | -      | 650899 | 652119 | 406  | 0       | NE | 0       | NE | 0     | NE |
| M5005_Spy_0647  | -      | 652373 | 654106 | 577  | 0       | NE | 0       | NE | 0     | NE |
| M5005_Spy_0648  | rpsP   | 654233 | 654505 | 90   | 0.00025 | NE | 0.00025 | NE | 0.001 | NE |
| M5005_Spy_0649  | -      | 654515 | 654754 | 79   | 0       | NE | 0       | NE | 0     | NE |
| M5005_Spy_0650  | -      | 654763 | 654870 | 35   | -1      | S  | -1      | S  | -1    | S  |
| M5005_Spy_0651  | -      | 655665 | 658691 | 1008 | 0       | NE | 0       | NE | 0     | NE |
| M5005_Spy_0652  | -      | 658711 | 659112 | 133  | 0       | NE | 0       | NE | 0     | NE |
| M5005_Spy_0653c | czcD   | 659292 | 660167 | 291  | 0.00025 | NE | 0       | NE | 0     | NE |
| M5005_Spy_0654  | -      | 660303 | 660824 | 173  | 0       | NE | 0       | NE | 0     | NE |
| M5005_Spy_0655  | rimM   | 661039 | 661557 | 172  | 0       | NE | 0.00225 | NE | 0.027 | NE |
| M5005_Spy_0656  | trmD   | 661547 | 662278 | 243  | 0.9995  | E  | 1       | E  | 1     | E  |
| M5005_Spy_0657  | trxB   | 662278 | 663270 | 330  | 0.00025 | NE | 0       | NE | 0     | NE |
| M5005_Spy_0658  | -      | 663448 | 664506 | 352  | 0       | NE | 0       | NE | 0     | NE |
| M5005_Spy_0659  | apbA   | 664519 | 665442 | 307  | 0       | NE | 0       | NE | 0     | NE |
| M5005_Spy_0660  | fruR   | 665698 | 666411 | 237  | 0       | NE | 0       | NE | 0     | NE |
| M5005_Spy_0661  | fruB   | 666408 | 667319 | 303  | 0       | NE | 0       | NE | 0.001 | NE |
| M5005_Spy_0662  | fruA   | 667316 | 669262 | 648  | 0.00025 | NE | 0       | NE | 0     | NE |
| M5005_Spy_0663  | mur1.1 | 669361 | 669954 | 197  | 0       | NE | 0       | NE | 0.001 | NE |
| M5005_Spy_0664  | mur1.2 | 670106 | 670813 | 235  | 0       | NE | 0       | NE | 0     | NE |
| M5005_Spy_0665c | -      | 670870 | 671088 | 72   | 0       | NE | 0       | NE | 0     | NE |
| M5005_Spy_0666c | -      | 671291 | 671410 | 39   | -1      | S  | -1      | S  | -1    | S  |
| M5005_Spy_0667c | -      | 671385 | 671594 | 69   | -1      | S  | -1      | S  | -1    | S  |
| M5005_Spy_0668c | mac    | 671769 | 672788 | 339  | 0       | NE | 0       | NE | 0     | NE |
| M5005_Spy_0669  | -      | 672944 | 673063 | 39   | -1      | S  | -1      | S  | -1    | S  |
| M5005_Spy_0670  | -      | 673287 | 673463 | 58   | 0       | NE | 0       | NE | 0     | NE |
| M5005_Spy_0671  | -      | 673691 | 674071 | 126  | 0       | NE | 0       | NE | 0.001 | NE |
| M5005_Spy_0672  | -      | 674071 | 674919 | 282  | 0       | NE | 0       | NE | 0     | NE |
| M5005_Spy_0673  | papS   | 675044 | 676252 | 402  | 1       | E  | 1       | E  | 1     | E  |
| M5005_Spy_0674  | -      | 676249 | 678126 | 625  | 0.00975 | NE | 0       | NE | 0     | NE |
| M5005_Spy_0675  | -      | 678383 | 678535 | 50   | -1      | S  | -1      | S  | -1    | S  |
| M5005_Spy_0676  | -      | 678544 | 678762 | 72   | 0       | NE | 0       | NE | 0     | NE |
| M5005_Spy_0677  | fms    | 679018 | 679428 | 136  | 0       | NE | 0       | NE | 0     | NE |
| M5005_Spy_0678c | -      | 679510 | 681522 | 670  | 0       | NE | 0       | NE | 0     | NE |
| M5005_Spy_0679  | -      | 681742 | 682392 | 216  | 0.00025 | NE | 0       | NE | 0.001 | NE |
| M5005_Spy_0680  | -      | 682395 | 683063 | 222  | 0       | NE | 0       | NE | 0     | NE |
| M5005_Spy_0681  | -      | 683072 | 684304 | 410  | 0       | NE | 0       | NE | 0     | NE |
| M5005_Spy_0682  | mvaK1  | 684583 | 685476 | 297  | 0.9995  | E  | 1       | E  | 0.999 | E  |
| M5005_Spy_0683  | mvaD   | 685458 | 686402 | 314  | 0.77975 | U  | 1       | E  | 1     | E  |
| M5005_Spy_0684  | mvaK2  | 686395 | 687402 | 335  | 0.99975 | E  | 0.97825 | U  | 1     | E  |
| M5005_Spy_0685  | -      | 687395 | 688384 | 329  | 0.99975 | E  | 1       | E  | 1     | E  |
| M5005_Spy_0686c | -      | 688614 | 689891 | 425  | 0.07925 | U  | 0.001   | NE | 1     | E  |
| M5005_Spy_0687c | mvaS.1 | 689878 | 691053 | 391  | 0.998   | E  | 1       | E  | 1     | E  |
| M5005_Spy_0688  | thyA   | 691262 | 692101 | 279  | 0       | NE | 0.99925 | E  | 0.8   | U  |
| M5005_Spy_0689  | dyr    | 692181 | 692678 | 165  | 0.99975 | E  | 1       | E  | 1     | E  |
| M5005_Spy_0690  | -      | 692698 | 692868 | 56   | 0       | NE | 0       | NE | 0     | NE |
| M5005_Spy_0691  | clpX   | 692998 | 694227 | 409  | 0.00025 | NE | 0       | NE | 0.001 | NE |
| M5005_Spy_0692  | engB   | 694237 | 694836 | 199  | 0.97325 | U  | 1       | E  | 1     | E  |
| M5005_Spy_0693  | -      | 694984 | 695727 | 247  | 0       | NE | 0       | NE | 0     | NE |
| M5005_Spy_0694c | clpL   | 695785 | 697884 | 699  | 0       | NE | 0       | NE | 0.001 | NE |
| M5005_Spy_0695  | rpiA   | 698263 | 698946 | 227  | 0.00025 | NE | 0.00025 | NE | 1     | E  |

|                 |            |        |        |     |         |    |         |    |       |    |
|-----------------|------------|--------|--------|-----|---------|----|---------|----|-------|----|
| M5005_Spy_0696  | deoB       | 699023 | 700234 | 403 | 0       | NE | 0       | NE | 0     | NE |
| M5005_Spy_0697  | arsC       | 700253 | 700693 | 146 | 0       | NE | 0       | NE | 0     | NE |
| M5005_Spy_0698  | punA       | 700677 | 701486 | 269 | 0       | NE | 0       | NE | 0.069 | U  |
| M5005_Spy_0699  | deoD       | 702149 | 702862 | 237 | 0       | NE | 0.004   | NE | 0.012 | NE |
| M5005_Spy_0700  | cpsX       | 702855 | 703643 | 262 | 0       | NE | 0       | NE | 0     | NE |
| M5005_Spy_0701c | cpsY       | 703722 | 704576 | 284 | 0       | NE | 0       | NE | 0     | NE |
| M5005_Spy_0702  | -          | 704849 | 705385 | 178 | 0       | NE | 0       | NE | 0.001 | NE |
| M5005_Spy_0703  | pyrF       | 705662 | 706354 | 230 | 0       | NE | 0       | NE | 0     | NE |
| M5005_Spy_0704  | pyrE       | 706412 | 707041 | 209 | 0       | NE | 0       | NE | 0     | NE |
| M5005_Spy_0705  | amiC       | 707238 | 708692 | 484 | 0       | NE | 0       | NE | 0     | NE |
| M5005_Spy_0706  | -          | 708810 | 709673 | 287 | 0       | NE | 0       | NE | 0     | NE |
| M5005_Spy_0707  | -          | 709702 | 710352 | 216 | 0       | NE | 0       | NE | 0     | NE |
| M5005_Spy_0708  | ung        | 710485 | 711138 | 217 | 0       | NE | 0       | NE | 0     | NE |
| M5005_Spy_0709  | pyrC       | 711270 | 712538 | 422 | 0.0005  | NE | 0       | NE | 0     | NE |
| M5005_Spy_0710c | -          | 712596 | 713237 | 213 | 0.0725  | U  | 1       | E  | 1     | E  |
| M5005_Spy_0711  | parE       | 713372 | 715321 | 649 | 0.981   | U  | 1       | E  | 1     | E  |
| M5005_Spy_0712  | parC       | 715412 | 717871 | 819 | 1       | E  | 1       | E  | 1     | E  |
| M5005_Spy_0713  | bcaT       | 717994 | 719016 | 340 | 0       | NE | 0       | NE | 0     | NE |
| M5005_Spy_0714  | -          | 719080 | 719310 | 76  | 0       | NE | 0       | NE | 0.077 | U  |
| M5005_Spy_0715  | rpsA       | 719701 | 720906 | 401 | 0.838   | U  | 1       | E  | 1     | E  |
| M5005_Spy_0716c | -          | 721453 | 721755 | 100 | 0       | NE | 0       | NE | 0     | NE |
| M5005_Spy_0717  | -          | 721954 | 722940 | 328 | 0       | NE | 0       | NE | 0     | NE |
| M5005_Spy_0718  | -          | 723011 | 723202 | 63  | 0.0015  | NE | 0       | NE | 0     | NE |
| M5005_Spy_0719  | -          | 723251 | 723670 | 139 | 0       | NE | 0       | NE | 0     | NE |
| M5005_Spy_0720  | -          | 723907 | 724815 | 302 | 0       | NE | 0       | NE | 0     | NE |
| M5005_Spy_0721c | -          | 724933 | 725109 | 58  | 0.91575 | U  | 0.97825 | U  | 0.971 | U  |
| M5005_Spy_0722  | miaA       | 725243 | 726142 | 299 | 0       | NE | 0       | NE | 0     | NE |
| M5005_Spy_0723  | hfiX       | 726215 | 727453 | 412 | 0.00025 | NE | 0       | NE | 0     | NE |
| M5005_Spy_0724  | -          | 727446 | 728081 | 211 | 0       | NE | 0       | NE | 0     | NE |
| M5005_Spy_0725  | elaC       | 728096 | 729025 | 309 | 0.98775 | U  | 1       | E  | 0.999 | E  |
| M5005_Spy_0726  | -          | 729025 | 729789 | 254 | 0       | NE | 0       | NE | 0     | NE |
| M5005_Spy_0727  | recJ       | 729786 | 731996 | 736 | 0       | NE | 0       | NE | 0     | NE |
| M5005_Spy_0728  | apt        | 732147 | 732665 | 172 | 0       | NE | 0       | NE | 0     | NE |
| M5005_Spy_0729  | dnaD       | 732746 | 733429 | 227 | 0.98725 | U  | 0.41925 | U  | 0.001 | NE |
| M5005_Spy_0730  | nth        | 733426 | 734082 | 218 | 0       | NE | 0       | NE | 0     | NE |
| M5005_Spy_0731  | -          | 734154 | 734738 | 194 | 0.9245  | U  | 1       | E  | 1     | E  |
| M5005_Spy_0732  | -          | 734829 | 735617 | 262 | 0       | NE | 0       | NE | 0     | NE |
| M5005_Spy_0733  | -          | 735657 | 736763 | 368 | 0       | NE | 0       | NE | 0     | NE |
| M5005_Spy_0734  | cpsFO/rmlA | 736821 | 737690 | 289 | 0.22075 | U  | 1       | E  | 1     | E  |
| M5005_Spy_0735  | cpsFP/rmlC | 737690 | 738283 | 197 | 0.95275 | U  | 1       | E  | 0.001 | NE |
| M5005_Spy_0736  | cpsFQ/rmlB | 738527 | 739567 | 346 | 0.9995  | E  | 1       | E  | 1     | E  |
| M5005_Spy_0737  | mutX       | 739788 | 740264 | 158 | 0       | NE | 0       | NE | 0     | NE |
| M5005_Spy_0738  | -          | 740322 | 741503 | 393 | 0       | NE | 0       | NE | 0     | NE |
| M5005_Spy_0739  | -          | 741493 | 742740 | 415 | 0       | NE | 0       | NE | 0     | NE |
| M5005_Spy_0740c | fbp        | 742799 | 744085 | 428 | 0       | NE | 0       | NE | 0.001 | NE |
| M5005_Spy_0742  | -          | 744497 | 744622 | 41  | -1      | S  | -1      | S  | -1    | S  |
| M5005_Spy_0743  | -          | 744804 | 745802 | 332 | 0.00025 | NE | 0       | NE | 0     | NE |
| M5005_Spy_0744  | -          | 745792 | 745971 | 59  | -1      | S  | -1      | S  | -1    | S  |
| M5005_Spy_0745  | -          | 746148 | 747017 | 289 | 0       | NE | 0       | NE | 0     | NE |
| M5005_Spy_0746  | -          | 747014 | 747772 | 252 | 0       | NE | 0       | NE | 0     | NE |
| M5005_Spy_0747  | -          | 747976 | 749637 | 553 | 0.011   | NE | 1       | E  | 1     | E  |
| M5005_Spy_0748  | estA       | 749770 | 750555 | 261 | 0       | NE | 0       | NE | 0     | NE |
| M5005_Spy_0749  | -          | 750585 | 750911 | 108 | 0       | NE | 0       | NE | 0     | NE |
| M5005_Spy_0750  | -          | 750957 | 752864 | 635 | 0       | NE | 0       | NE | 0     | NE |
| M5005_Spy_0751  | acoA       | 753149 | 754117 | 322 | 0       | NE | 0       | NE | 0     | NE |
| M5005_Spy_0752  | acoB       | 754173 | 755174 | 333 | 0       | NE | 0       | NE | 0     | NE |
| M5005_Spy_0753  | acoC       | 755359 | 756768 | 469 | 0       | NE | 0       | NE | 0     | NE |
| M5005_Spy_0754c | -          | 756823 | 757062 | 79  | 0.0005  | NE | 0       | NE | 0     | NE |
| M5005_Spy_0755  | acoL       | 757095 | 758858 | 587 | 0.0005  | NE | 0       | NE | 0     | NE |
| M5005_Spy_0756c | -          | 758874 | 759086 | 70  | 0       | NE | 0       | NE | 0     | NE |
| M5005_Spy_0757c | hylA       | 759532 | 761949 | 805 | 0.00025 | NE | 0       | NE | 0     | NE |
| M5005_Spy_0758  | lplB       | 762182 | 763171 | 329 | 0       | NE | 0       | NE | 0     | NE |
| M5005_Spy_0759c | cobQ       | 763280 | 764071 | 263 | 0.95425 | U  | 1       | E  | 1     | E  |

|                 |            |        |        |      |         |    |         |    |       |    |
|-----------------|------------|--------|--------|------|---------|----|---------|----|-------|----|
| M5005_Spy_0760c | murC2      | 764071 | 765414 | 447  | 0.999   | E  | 1       | E  | 1     | E  |
| M5005_Spy_0761  | -          | 765521 | 766372 | 283  | 1       | E  | 1       | E  | 1     | E  |
| M5005_Spy_0762  | -          | 766369 | 767325 | 318  | 0       | NE | 0       | NE | 0     | NE |
| M5005_Spy_0763  | glmM       | 767379 | 768734 | 451  | 0.99775 | E  | 1       | E  | 1     | E  |
| M5005_Spy_0764  | -          | 768868 | 769509 | 213  | 0       | NE | 0       | NE | 0     | NE |
| M5005_Spy_0765  | hemN       | 769506 | 770702 | 398  | 0       | NE | 0       | NE | 0     | NE |
| M5005_Spy_0766  | -          | 770712 | 771464 | 250  | 0       | NE | 0       | NE | 1     | E  |
| M5005_Spy_0767  | -          | 771464 | 772228 | 254  | 0       | NE | 0       | NE | 0     | NE |
| M5005_Spy_0768  | -          | 772228 | 772860 | 210  | 0       | NE | 0       | NE | 0     | NE |
| M5005_Spy_0769  | cas9       | 773340 | 777446 | 1368 | 0.00025 | NE | 0       | NE | 0     | NE |
| M5005_Spy_0770  | cas1       | 777446 | 778315 | 289  | 0       | NE | 0       | NE | 0     | NE |
| M5005_Spy_0771  | cas2       | 778312 | 778653 | 113  | 0       | NE | 0       | NE | 0     | NE |
| M5005_Spy_0772  | csn2       | 778643 | 779305 | 220  | 0       | NE | 0       | NE | 0     | NE |
| M5005_Spy_0773c | -          | 779352 | 779639 | 95   | 0       | NE | 0       | NE | 0     | NE |
| M5005_Spy_0774  | -          | 779772 | 779951 | 59   | 0       | NE | 0       | NE | 0     | NE |
| M5005_Spy_0775  | -          | 780015 | 780161 | 48   | -1      | S  | -1      | S  | -1    | S  |
| M5005_Spy_0776  | lepA       | 780285 | 782117 | 610  | 0       | NE | 0       | NE | 0     | NE |
| M5005_Spy_0777  | sclB       | 782375 | 783256 | 293  | 0       | NE | 0       | NE | 0     | NE |
| M5005_Spy_0778  | msrBj/crsA | 783442 | 783879 | 145  | 0       | NE | 0       | NE | 0.001 | NE |
| M5005_Spy_0779  | -          | 783994 | 785013 | 339  | 0       | NE | 0       | NE | 0     | NE |
| M5005_Spy_0780  | -          | 785220 | 785645 | 141  | 0.00025 | NE | 0       | NE | 0     | NE |
| M5005_Spy_0781  | ptsB       | 785664 | 786155 | 163  | 0       | NE | 0       | NE | 0     | NE |
| M5005_Spy_0782  | ptsC       | 786172 | 786981 | 269  | 0       | NE | 0       | NE | 0     | NE |
| M5005_Spy_0783  | ptsD       | 786978 | 787805 | 275  | 0       | NE | 0       | NE | 0     | NE |
| M5005_Spy_0784  | -          | 787941 | 789590 | 549  | 0       | NE | 0       | NE | 0     | NE |
| M5005_Spy_0785  | -          | 789594 | 790382 | 262  | 0       | NE | 0       | NE | 0     | NE |
| M5005_Spy_0786  | -          | 790376 | 791422 | 348  | 0       | NE | 0       | NE | 0     | NE |
| M5005_Spy_0787  | -          | 791519 | 791866 | 115  | 0       | NE | 0       | NE | 0     | NE |
| M5005_Spy_0788  | -          | 792201 | 792767 | 188  | 0       | NE | 0       | NE | 0     | NE |
| M5005_Spy_0789  | -          | 792783 | 793472 | 229  | 0       | NE | 0       | NE | 0     | NE |
| M5005_Spy_0790  | gabD       | 793567 | 794964 | 465  | 0       | NE | 0       | NE | 0     | NE |
| M5005_Spy_0791  | uvrC       | 795066 | 796862 | 598  | 0.00025 | NE | 0       | NE | 0     | NE |
| M5005_Spy_0792  | -          | 797047 | 797649 | 200  | 0       | NE | 0       | NE | 0     | NE |
| M5005_Spy_0793  | -          | 797774 | 799183 | 469  | 0       | NE | 0       | NE | 0     | NE |
| M5005_Spy_0794c | trmE       | 799251 | 800627 | 458  | 0.3345  | U  | 0       | NE | 1     | E  |
| M5005_Spy_0795  | rplJ       | 800960 | 801460 | 166  | 0.0025  | NE | 0.00025 | NE | 0.001 | NE |
| M5005_Spy_0796  | rplL       | 801525 | 801890 | 121  | 0.00175 | NE | 0.00025 | NE | 0.001 | NE |
| M5005_Spy_0797  | -          | 802286 | 802426 | 46   | -1      | S  | -1      | S  | -1    | S  |
| M5005_Spy_0798  | -          | 802420 | 802788 | 122  | 0       | NE | 0       | NE | 0     | NE |
| M5005_Spy_0799  | -          | 802767 | 802904 | 45   | -1      | S  | -1      | S  | -1    | S  |
| M5005_Spy_0800  | -          | 802963 | 803286 | 107  | 0       | NE | 0       | NE | 0     | NE |
| M5005_Spy_0801  | -          | 803344 | 803466 | 40   | -1      | S  | -1      | S  | -1    | S  |
| M5005_Spy_0802  | -          | 803599 | 803811 | 70   | 0       | NE | 0       | NE | 0     | NE |
| M5005_Spy_0803  | srtI       | 804076 | 804771 | 231  | 0       | NE | 0       | NE | 0     | NE |
| M5005_Spy_0804  | srtR       | 804922 | 805608 | 228  | 0       | NE | 0       | NE | 0     | NE |
| M5005_Spy_0805  | srtK       | 805601 | 806947 | 448  | 0.00025 | NE | 0       | NE | 0     | NE |
| M5005_Spy_0806  | srtA       | 807095 | 807235 | 46   | -1      | S  | -1      | S  | -1    | S  |
| M5005_Spy_0807  | srtT       | 807350 | 807967 | 205  | 0       | NE | 0       | NE | 0     | NE |
| M5005_Spy_0808  | srtF       | 808049 | 808738 | 229  | 0       | NE | 0       | NE | 0     | NE |
| M5005_Spy_0809  | srtE       | 808744 | 809493 | 249  | 0.00025 | NE | 0       | NE | 0     | NE |
| M5005_Spy_0810  | srtG       | 809496 | 810218 | 240  | 0       | NE | 0       | NE | 0     | NE |
| M5005_Spy_0811  | -          | 810410 | 810628 | 72   | 0       | NE | 0       | NE | 0     | NE |
| M5005_Spy_0812c | -          | 810737 | 810952 | 71   | 0       | NE | 0       | NE | 0     | NE |
| M5005_Spy_0817  | dacA1      | 812371 | 813699 | 442  | 0.00025 | NE | 0       | NE | 0.001 | NE |
| M5005_Spy_0818c | -          | 813816 | 814778 | 320  | 0       | NE | 0       | NE | 0     | NE |
| M5005_Spy_0819  | -          | 814866 | 815021 | 51   | -1      | S  | -1      | S  | -1    | S  |
| M5005_Spy_0820  | folC.1     | 815110 | 816387 | 425  | 0.99325 | U  | 1       | E  | 1     | E  |
| M5005_Spy_0821  | folE       | 816434 | 817000 | 188  | 0       | NE | 0       | NE | 0     | NE |
| M5005_Spy_0822  | folP       | 817009 | 817809 | 266  | 0.00025 | NE | 0.0005  | NE | 1     | E  |
| M5005_Spy_0823  | folQ       | 817816 | 818175 | 119  | 0.00025 | NE | 0       | NE | 0.001 | NE |
| M5005_Spy_0824  | folK       | 818172 | 818672 | 166  | 0       | NE | 0       | NE | 0.696 | U  |
| M5005_Spy_0825  | murB       | 818822 | 819709 | 295  | 1       | E  | 1       | E  | 1     | E  |
| M5005_Spy_0826  | potA       | 819755 | 820909 | 384  | 0       | NE | 0       | NE | 0.001 | NE |

|                 |          |        |        |     |         |    |         |    |       |    |
|-----------------|----------|--------|--------|-----|---------|----|---------|----|-------|----|
| M5005_Spy_0827  | potB     | 820893 | 821687 | 264 | 0       | NE | 0       | NE | 0     | NE |
| M5005_Spy_0828  | potC     | 821684 | 822460 | 258 | 0       | NE | 0       | NE | 0     | NE |
| M5005_Spy_0829  | potD     | 822453 | 823526 | 357 | 0       | NE | 0       | NE | 0     | NE |
| M5005_Spy_0830c | dpiA     | 823581 | 824246 | 221 | 0       | NE | 0       | NE | 0     | NE |
| M5005_Spy_0831c | dpiB     | 824227 | 825768 | 513 | 0       | NE | 0       | NE | 0     | NE |
| M5005_Spy_0832  | malP     | 825929 | 827260 | 443 | 0.00025 | NE | 0       | NE | 0     | NE |
| M5005_Spy_0833  | -        | 827291 | 828457 | 388 | 0.00025 | NE | 0       | NE | 0     | NE |
| M5005_Spy_0834c | -        | 828540 | 829631 | 363 | 0       | NE | 0       | NE | 0     | NE |
| M5005_Spy_0835  | aphA     | 829825 | 830187 | 120 | 0       | NE | 0       | NE | 0     | NE |
| M5005_Spy_0837  | -        | 830733 | 832265 | 510 | 0       | NE | 0       | NE | 0     | NE |
| M5005_Spy_0838  | -        | 832428 | 833042 | 204 | 0       | NE | 0       | NE | 0     | NE |
| M5005_Spy_0839  | -        | 833222 | 834349 | 375 | 0       | NE | 0       | NE | 0     | NE |
| M5005_Spy_0840  | radC     | 834398 | 835078 | 226 | 0.00025 | NE | 0       | NE | 0     | NE |
| M5005_Spy_0841c | -        | 835080 | 835775 | 231 | 0       | NE | 0       | NE | 0     | NE |
| M5005_Spy_0842c | -        | 835785 | 836429 | 214 | 0.00025 | NE | 0       | NE | 0.99  | U  |
| M5005_Spy_0843c | -        | 836681 | 837028 | 115 | 0       | NE | 0       | NE | 0     | NE |
| M5005_Spy_0844c | nifS2    | 837018 | 838145 | 375 | 0.8785  | U  | 1       | E  | 1     | E  |
| M5005_Spy_0845c | prs      | 838142 | 839122 | 326 | 0       | NE | 0       | NE | 0.001 | NE |
| M5005_Spy_0846c | -        | 839262 | 839840 | 192 | 0       | NE | 0       | NE | 0     | NE |
| M5005_Spy_0847  | -        | 839928 | 840599 | 223 | 0.00025 | NE | 0       | NE | 0.001 | NE |
| M5005_Spy_0848  | ppnK     | 840574 | 841410 | 278 | 1       | E  | 1       | E  | 1     | E  |
| M5005_Spy_0849  | rldD     | 841407 | 842312 | 301 | 0       | NE | 0       | NE | 0     | NE |
| M5005_Spy_0851  | pta/eutD | 842489 | 843310 | 273 | 0       | NE | 0       | NE | 0     | NE |
| M5005_Spy_0852  | -        | 843437 | 844054 | 205 | 0       | NE | 0       | NE | 0     | NE |
| M5005_Spy_0853  | -        | 844051 | 844209 | 52  | -1      | S  | -1      | S  | -1    | S  |
| M5005_Spy_0854c | -        | 844403 | 845092 | 229 | 0       | NE | 0       | NE | 0     | NE |
| M5005_Spy_0855  | proV     | 845512 | 846240 | 242 | 0       | NE | 0       | NE | 0     | NE |
| M5005_Spy_0856  | proX     | 846233 | 847759 | 508 | 0       | NE | 0       | NE | 0     | NE |
| M5005_Spy_0857  | guaC     | 848037 | 849020 | 327 | 0       | NE | 0       | NE | 0     | NE |
| M5005_Spy_0858  | xpt      | 849325 | 849906 | 193 | 0       | NE | 0       | NE | 0     | NE |
| M5005_Spy_0859  | -        | 849906 | 851189 | 427 | 0.00025 | NE | 0       | NE | 0     | NE |
| M5005_Spy_0860c | apbE     | 851253 | 852191 | 312 | 0       | NE | 0       | NE | 0     | NE |
| M5005_Spy_0861c | -        | 852244 | 852429 | 61  | 0       | NE | 0       | NE | 0     | NE |
| M5005_Spy_0862  | tdk2     | 852567 | 853136 | 189 | 0       | NE | 0       | NE | 0     | NE |
| M5005_Spy_0863  | prfA     | 853171 | 854250 | 359 | 1       | E  | 1       | E  | 1     | E  |
| M5005_Spy_0864  | hemK     | 854250 | 855089 | 279 | 0       | NE | 0       | NE | 0     | NE |
| M5005_Spy_0865  | -        | 855073 | 855663 | 196 | 0.00475 | NE | 0.00475 | NE | 0.665 | U  |
| M5005_Spy_0866  | -        | 855681 | 856133 | 150 | 0       | NE | 0       | NE | 0     | NE |
| M5005_Spy_0867  | glyA     | 856123 | 857379 | 418 | 0       | NE | 0       | NE | 0     | NE |
| M5005_Spy_0868  | -        | 857386 | 858363 | 325 | 0.00025 | NE | 0       | NE | 0.001 | NE |
| M5005_Spy_0869  | -        | 858364 | 858963 | 199 | 0       | NE | 0       | NE | 0     | NE |
| M5005_Spy_0870  | -        | 858973 | 860697 | 574 | 0       | NE | 0       | NE | 0     | NE |
| M5005_Spy_0871  | -        | 860694 | 862421 | 575 | 0.00025 | NE | 0       | NE | 0     | NE |
| M5005_Spy_0872  | nox      | 862962 | 864032 | 356 | 0       | NE | 0       | NE | 0     | NE |
| M5005_Spy_0873c | ldh      | 864191 | 865174 | 327 | 0.00025 | NE | 0       | NE | 0.002 | NE |
| M5005_Spy_0874  | gyrA     | 865365 | 867851 | 828 | 1       | E  | 1       | E  | 1     | E  |
| M5005_Spy_0875  | -        | 867871 | 868620 | 249 | 0.9985  | E  | 1       | E  | 1     | E  |
| M5005_Spy_0876  | -        | 868700 | 869116 | 138 | 0       | NE | 0       | NE | 0     | NE |
| M5005_Spy_0877  | -        | 869603 | 869722 | 39  | -1      | S  | -1      | S  | -1    | S  |
| M5005_Spy_0878  | -        | 869730 | 870098 | 122 | 0.0005  | NE | 0       | NE | 0.001 | NE |
| M5005_Spy_0879c | -        | 870148 | 871059 | 303 | 0       | NE | 0       | NE | 0     | NE |
| M5005_Spy_0880c | hlyIII   | 871176 | 871826 | 216 | 0.00025 | NE | 0.00025 | NE | 1     | E  |
| M5005_Spy_0881c | -        | 871823 | 872263 | 146 | 0.00025 | NE | 0       | NE | 0.001 | NE |
| M5005_Spy_0882  | rbgA     | 872482 | 873330 | 282 | 1       | E  | 1       | E  | 1     | E  |
| M5005_Spy_0883  | rmhB     | 873320 | 874111 | 263 | 0.00025 | NE | 0       | NE | 0     | NE |
| M5005_Spy_0884  | smf      | 874176 | 875012 | 278 | 0.00025 | NE | 0       | NE | 0     | NE |
| M5005_Spy_0885  | topA     | 875119 | 877248 | 709 | 0       | NE | 0.069   | U  | 0.995 | E  |
| M5005_Spy_0886c | -        | 877323 | 877805 | 160 | 0       | NE | 0       | NE | 0     | NE |
| M5005_Spy_0887c | -        | 877812 | 877934 | 40  | -1      | S  | -1      | S  | -1    | S  |
| M5005_Spy_0888c | -        | 878080 | 878205 | 41  | -1      | S  | -1      | S  | -1    | S  |
| M5005_Spy_0889  | -        | 878218 | 878763 | 181 | 0       | NE | 0       | NE | 0     | NE |
| M5005_Spy_0890  | ddh      | 878778 | 879770 | 330 | 0       | NE | 0       | NE | 0     | NE |
| M5005_Spy_0891  | satD     | 879875 | 880540 | 221 | 1       | E  | 0.99975 | E  | 1     | E  |



|                 |       |        |        |     |         |    |         |    |       |    |
|-----------------|-------|--------|--------|-----|---------|----|---------|----|-------|----|
| M5005_Spy_0892  | satE  | 880533 | 881249 | 238 | 0       | NE | 0       | NE | 0     | NE |
| M5005_Spy_0893  | gid   | 881400 | 882746 | 448 | 0.00025 | NE | 0       | NE | 0.389 | U  |
| M5005_Spy_0894  | oadA2 | 882899 | 884305 | 468 | 0       | NE | 0       | NE | 0     | NE |
| M5005_Spy_0895  | -     | 884348 | 884662 | 104 | 0.00025 | NE | 0       | NE | 0.001 | NE |
| M5005_Spy_0896  | -     | 884662 | 885012 | 116 | 0       | NE | 0       | NE | 0     | NE |
| M5005_Spy_0897  | -     | 885022 | 886152 | 376 | 0       | NE | 0       | NE | 0     | NE |
| M5005_Spy_0898c | -     | 886352 | 887236 | 294 | 0       | NE | 0       | NE | 0     | NE |
| M5005_Spy_0899c | citG  | 887229 | 887924 | 231 | 0       | NE | 0       | NE | 0     | NE |
| M5005_Spy_0900c | -     | 888082 | 889488 | 468 | 0       | NE | 0       | NE | 0     | NE |
| M5005_Spy_0901  | -     | 889865 | 890188 | 107 | 0       | NE | 0       | NE | 0     | NE |
| M5005_Spy_0902  | -     | 890242 | 890640 | 132 | 0       | NE | 0       | NE | 0     | NE |
| M5005_Spy_0903  | oadB  | 890685 | 891806 | 373 | 0       | NE | 0       | NE | 0     | NE |
| M5005_Spy_0904  | -     | 891824 | 891958 | 44  | -1      | S  | -1      | S  | -1    | S  |
| M5005_Spy_0905  | citD  | 891994 | 892302 | 102 | 0       | NE | 0       | NE | 0     | NE |
| M5005_Spy_0906  | citE  | 892320 | 893177 | 285 | 0       | NE | 0       | NE | 0     | NE |
| M5005_Spy_0907  | citF  | 893180 | 894712 | 510 | 0.00025 | NE | 0       | NE | 0.836 | U  |
| M5005_Spy_0908  | citX  | 894642 | 895283 | 213 | 0       | NE | 0       | NE | 0     | NE |
| M5005_Spy_0909  | oadA1 | 895298 | 896692 | 464 | 0.00025 | NE | 0.0005  | NE | 0.001 | NE |
| M5005_Spy_0910c | citC  | 896802 | 897854 | 350 | 0       | NE | 0       | NE | 0     | NE |
| M5005_Spy_0911c | -     | 897943 | 898425 | 160 | 0       | NE | 0       | NE | 0     | NE |
| M5005_Spy_0912  | -     | 898910 | 899014 | 34  | -1      | S  | -1      | S  | -1    | S  |
| M5005_Spy_0913c | xerS  | 899125 | 900039 | 304 | 0.8115  | U  | 0.61075 | U  | 1     | E  |
| M5005_Spy_0914  | -     | 900733 | 901362 | 209 | 0.00025 | NE | 0       | NE | 0.001 | NE |
| M5005_Spy_0915c | ffh   | 901479 | 903041 | 520 | 0.98975 | U  | 1       | E  | 0.999 | E  |
| M5005_Spy_0916c | ylxM  | 903056 | 903397 | 113 | 0.00025 | NE | 0.00075 | NE | 1     | E  |
| M5005_Spy_0917c | -     | 903486 | 904184 | 232 | 0.00025 | NE | 0.00025 | NE | 1     | E  |
| M5005_Spy_0918c | -     | 904267 | 905700 | 477 | 0       | NE | 0       | NE | 0     | NE |
| M5005_Spy_0919  | guaA  | 905867 | 907429 | 520 | 0.49925 | U  | 0.001   | NE | 1     | E  |
| M5005_Spy_0920c | murM2 | 907471 | 908694 | 407 | 0       | NE | 0       | NE | 0     | NE |
| M5005_Spy_0921c | -     | 909059 | 910603 | 514 | 0.00025 | NE | 0       | NE | 0     | NE |
| M5005_Spy_0922c | pdxK  | 910737 | 911294 | 185 | 0       | NE | 0       | NE | 0     | NE |
| M5005_Spy_0923c | -     | 911272 | 912138 | 288 | 0       | NE | 0       | NE | 0     | NE |
| M5005_Spy_0924  | -     | 912228 | 913496 | 422 | 0       | NE | 0       | NE | 0     | NE |
| M5005_Spy_0925c | rnhB  | 913894 | 914250 | 118 | 0       | NE | 0       | NE | 0     | NE |
| M5005_Spy_0926c | -     | 914572 | 916149 | 525 | 0.00025 | NE | 0       | NE | 0.148 | U  |
| M5005_Spy_0927c | fhS.1 | 916234 | 917904 | 556 | 1       | E  | 1       | E  | 1     | E  |
| M5005_Spy_0928c | lplA  | 918032 | 919051 | 339 | 0       | NE | 0       | NE | 0     | NE |
| M5005_Spy_0929c | -     | 919098 | 919979 | 293 | 0       | NE | 0       | NE | 0     | NE |
| M5005_Spy_0930c | -     | 919972 | 920784 | 270 | 0       | NE | 0       | NE | 0     | NE |
| M5005_Spy_0931c | -     | 920777 | 921109 | 110 | 0       | NE | 0       | NE | 0     | NE |
| M5005_Spy_0932c | -     | 921151 | 922149 | 332 | 0       | NE | 0       | NE | 0     | NE |
| M5005_Spy_0933c | -     | 922146 | 923345 | 399 | 0.00025 | NE | 0       | NE | 0     | NE |
| M5005_Spy_0934c | -     | 923342 | 924178 | 278 | 0       | NE | 0       | NE | 0     | NE |
| M5005_Spy_0935  | dppB  | 924374 | 925066 | 230 | 0       | NE | 0.00025 | NE | 1     | E  |
| M5005_Spy_0936  | dfp   | 925059 | 925604 | 181 | 0.00025 | NE | 0.996   | E  | 1     | E  |
| M5005_Spy_0937  | -     | 925662 | 926231 | 189 | 0.00025 | NE | 0       | NE | 0.001 | NE |
| M5005_Spy_0938  | pgmA  | 926407 | 928125 | 572 | 1       | E  | 1       | E  | 1     | E  |
| M5005_Spy_0939c | -     | 928338 | 929294 | 318 | 0       | NE | 0       | NE | 0     | NE |
| M5005_Spy_0940c | -     | 929296 | 930360 | 354 | 0.00025 | NE | 0       | NE | 0     | NE |
| M5005_Spy_0941c | -     | 930353 | 931903 | 516 | 0       | NE | 0       | NE | 0     | NE |
| M5005_Spy_0942c | -     | 932024 | 933076 | 350 | 0       | NE | 0       | NE | 0     | NE |
| M5005_Spy_0943c | cdd   | 933170 | 933559 | 129 | 0       | NE | 0       | NE | 0     | NE |
| M5005_Spy_0944c | -     | 934218 | 934805 | 195 | 0       | NE | 0       | NE | 0     | NE |
| M5005_Spy_0945  | coaA  | 935073 | 935993 | 306 | 1       | E  | 1       | E  | 1     | E  |
| M5005_Spy_0946  | rpsT  | 936062 | 936295 | 77  | 0.0005  | NE | 0       | NE | 0     | NE |
| M5005_Spy_0947c | ciaH  | 936420 | 937730 | 436 | 0.0005  | NE | 0       | NE | 0.001 | NE |
| M5005_Spy_0948c | ciaR  | 937723 | 938397 | 224 | 0       | NE | 0       | NE | 0.004 | NE |
| M5005_Spy_0949c | pepN  | 938743 | 941280 | 845 | 0       | NE | 0       | NE | 0     | NE |
| M5005_Spy_0950c | phoU  | 941485 | 942138 | 217 | 0.00025 | NE | 0       | NE | 0.086 | U  |
| M5005_Spy_0951c | pstB  | 942206 | 942964 | 252 | 0.00025 | NE | 0       | NE | 0     | NE |
| M5005_Spy_0952c | pstB2 | 942977 | 943780 | 267 | 0.00025 | NE | 0       | NE | 0     | NE |
| M5005_Spy_0953c | pstA  | 943796 | 944683 | 295 | 0.00025 | NE | 0       | NE | 0     | NE |
| M5005_Spy_0954c | pstC  | 944673 | 945491 | 272 | 0       | NE | 0.0625  | U  | 0.001 | NE |

|                 |       |         |         |      |         |    |         |    |       |    |
|-----------------|-------|---------|---------|------|---------|----|---------|----|-------|----|
| M5005_Spy_0955c | pstS  | 945618  | 946484  | 288  | 0.00025 | NE | 0       | NE | 0     | NE |
| M5005_Spy_0956c | -     | 946623  | 947933  | 436  | 0.00025 | NE | 1       | E  | 1     | E  |
| M5005_Spy_0957c | -     | 947936  | 948724  | 262  | 0.04525 | NE | 0       | NE | 0.001 | NE |
| M5005_Spy_0958c | -     | 948714  | 948992  | 92   | 0       | NE | 0       | NE | 0     | NE |
| M5005_Spy_0959c | spxA  | 948994  | 949398  | 134  | 0       | NE | 0       | NE | 0     | NE |
| M5005_Spy_0960c | mreA  | 949441  | 950373  | 310  | 1       | E  | 1       | E  | 1     | E  |
| M5005_Spy_0961c | truB  | 950402  | 951286  | 294  | 0.00025 | NE | 0       | NE | 0     | NE |
| M5005_Spy_0962c | -     | 951402  | 952742  | 446  | 0       | NE | 0       | NE | 0     | NE |
| M5005_Spy_0963c | -     | 952839  | 953795  | 318  | 0       | NE | 0       | NE | 0     | NE |
| M5005_Spy_0964c | -     | 953806  | 954402  | 198  | 0       | NE | 0       | NE | 0     | NE |
| M5005_Spy_0965c | -     | 954494  | 955669  | 391  | 0       | NE | 0       | NE | 0     | NE |
| M5005_Spy_0967c | -     | 957146  | 957847  | 233  | 0       | NE | 0       | NE | 0     | NE |
| M5005_Spy_0968  | -     | 957965  | 958507  | 180  | 0       | NE | 0       | NE | 0     | NE |
| M5005_Spy_0969c | -     | 958504  | 958647  | 47   | -1      | S  | -1      | S  | -1    | S  |
| M5005_Spy_0970c | -     | 958650  | 959291  | 213  | 0       | NE | 0       | NE | 0     | NE |
| M5005_Spy_0971c | -     | 959454  | 959942  | 162  | 0.00025 | NE | 0       | NE | 0.001 | NE |
| M5005_Spy_0972c | -     | 959953  | 960153  | 66   | 0       | NE | 0       | NE | 0     | NE |
| M5005_Spy_0973c | -     | 960194  | 960733  | 179  | 0       | NE | 0       | NE | 0     | NE |
| M5005_Spy_0974c | -     | 960746  | 960934  | 62   | 0.148   | U  | 0       | NE | 0.003 | NE |
| M5005_Spy_0975c | -     | 960945  | 961532  | 195  | 0       | NE | 0       | NE | 0     | NE |
| M5005_Spy_0976c | -     | 961593  | 961799  | 68   | 0       | NE | 0       | NE | 0.001 | NE |
| M5005_Spy_0977c | pcrA  | 962205  | 964523  | 772  | 0.0245  | NE | 0.006   | NE | 1     | E  |
| M5005_Spy_0978  | -     | 964891  | 965061  | 56   | 0.00025 | NE | 0.0415  | NE | 1     | E  |
| M5005_Spy_0979c | -     | 965052  | 966374  | 440  | -1      | S  | -1      | S  | -1    | S  |
| M5005_Spy_0980  | -     | 966494  | 967729  | 411  | 0.00025 | NE | 0       | NE | 0     | NE |
| M5005_Spy_0981c | cfa   | 968098  | 968871  | 257  | 0       | NE | 0       | NE | 0     | NE |
| M5005_Spy_0982c | -     | 969241  | 970077  | 278  | 0       | NE | 0       | NE | 0     | NE |
| M5005_Spy_0983c | -     | 970093  | 970722  | 209  | 0.06425 | U  | 0       | NE | 0     | NE |
| M5005_Spy_0984c | -     | 970732  | 971373  | 213  | 0       | NE | 0       | NE | 0     | NE |
| M5005_Spy_0985c | -     | 971479  | 971814  | 111  | 0       | NE | 0       | NE | 0     | NE |
| M5005_Spy_0986c | glmS  | 972010  | 973824  | 604  | 1       | E  | 1       | E  | 1     | E  |
| M5005_Spy_0987c | sipC  | 974000  | 974557  | 185  | 0       | NE | 0       | NE | 0     | NE |
| M5005_Spy_0988c | pyk   | 974775  | 976277  | 500  | 0.999   | E  | 1       | E  | 1     | E  |
| M5005_Spy_0989c | pfkA  | 976340  | 977353  | 337  | 0.99325 | U  | 1       | E  | 1     | E  |
| M5005_Spy_0990c | dnaE  | 977433  | 980543  | 1036 | 1       | E  | 1       | E  | 1     | E  |
| M5005_Spy_0991  | -     | 980728  | 981099  | 123  | 0.00025 | NE | 0.00075 | NE | 0.747 | U  |
| M5005_Spy_0992  | -     | 981099  | 981797  | 232  | 0       | NE | 0       | NE | 0     | NE |
| M5005_Spy_0993  | -     | 981807  | 982592  | 261  | 0       | NE | 0       | NE | 0     | NE |
| M5005_Spy_0994c | -     | 982719  | 983333  | 204  | 0.00025 | NE | 0.00025 | NE | 1     | E  |
| M5005_Spy_0995c | -     | 983924  | 984112  | 62   | 0       | NE | 0       | NE | 0     | NE |
| M5005_Spy_0996  | speA2 | 984332  | 985087  | 251  | 0       | NE | 0       | NE | 0     | NE |
| M5005_Spy_0997c | -     | 985209  | 985868  | 219  | 0       | NE | 0       | NE | 0     | NE |
| M5005_Spy_0998c | -     | 985868  | 986089  | 73   | 0       | NE | 0       | NE | 0     | NE |
| M5005_Spy_0999c | -     | 986099  | 986872  | 257  | 0.00025 | NE | 0       | NE | 0     | NE |
| M5005_Spy_1000c | -     | 986883  | 987485  | 200  | 0       | NE | 0       | NE | 0     | NE |
| M5005_Spy_1001c | -     | 987497  | 988261  | 254  | 0       | NE | 0       | NE | 0     | NE |
| M5005_Spy_1002c | -     | 988263  | 988595  | 110  | 0       | NE | 0       | NE | 0     | NE |
| M5005_Spy_1003c | -     | 988595  | 988963  | 122  | 0       | NE | 0       | NE | 0     | NE |
| M5005_Spy_1004c | -     | 988932  | 989096  | 54   | -1      | S  | -1      | S  | -1    | S  |
| M5005_Spy_1005c | -     | 989068  | 989415  | 115  | 0       | NE | 0       | NE | 0     | NE |
| M5005_Spy_1006c | -     | 989426  | 991177  | 583  | 0       | NE | 0       | NE | 0     | NE |
| M5005_Spy_1007c | -     | 991293  | 994733  | 1146 | 0.00025 | NE | 0       | NE | 0     | NE |
| M5005_Spy_1008c | -     | 994734  | 996218  | 494  | 0       | NE | 0       | NE | 0     | NE |
| M5005_Spy_1009c | -     | 996219  | 998024  | 601  | 0       | NE | 0       | NE | 0     | NE |
| M5005_Spy_1010c | -     | 998017  | 998475  | 152  | 0       | NE | 0       | NE | 0.833 | U  |
| M5005_Spy_1011c | -     | 998448  | 998765  | 105  | 0.00025 | NE | 0       | NE | 0     | NE |
| M5005_Spy_1012c | -     | 998778  | 999284  | 168  | 0       | NE | 0       | NE | 0     | NE |
| M5005_Spy_1013c | -     | 999296  | 999706  | 136  | 0.00025 | NE | 0       | NE | 0     | NE |
| M5005_Spy_1014c | -     | 999708  | 1000103 | 131  | 0       | NE | 0       | NE | 0     | NE |
| M5005_Spy_1015c | -     | 1000100 | 1000411 | 103  | 0.00025 | NE | 0       | NE | 0.001 | NE |
| M5005_Spy_1016c | -     | 1000408 | 1000752 | 114  | 0.00025 | NE | 0       | NE | 0     | NE |
| M5005_Spy_1017c | -     | 1000766 | 1001059 | 97   | 0       | NE | 0       | NE | 0     | NE |
| M5005_Spy_1018c | -     | 1001072 | 1001962 | 296  | 0       | NE | 0       | NE | 0     | NE |

|                 |        |         |         |     |         |    |         |    |       |    |
|-----------------|--------|---------|---------|-----|---------|----|---------|----|-------|----|
| M5005_Spy_1019c | -      | 1001981 | 1002550 | 189 | 0.00025 | NE | 0       | NE | 0     | NE |
| M5005_Spy_1020c | -      | 1002795 | 1003064 | 89  | 0       | NE | 0       | NE | 0     | NE |
| M5005_Spy_1021c | -      | 1003071 | 1003979 | 302 | 0       | NE | 0       | NE | 0     | NE |
| M5005_Spy_1022c | -      | 1003948 | 1005273 | 441 | 0       | NE | 0       | NE | 0     | NE |
| M5005_Spy_1023c | -      | 1005273 | 1006547 | 424 | 0       | NE | 0       | NE | 0     | NE |
| M5005_Spy_1024c | -      | 1006537 | 1006917 | 126 | 0.00025 | NE | 0       | NE | 0     | NE |
| M5005_Spy_1025c | -      | 1007527 | 1007961 | 144 | 0       | NE | 0       | NE | 0     | NE |
| M5005_Spy_1026c | -      | 1008247 | 1008513 | 88  | 0       | NE | 0       | NE | 0     | NE |
| M5005_Spy_1027c | -      | 1008510 | 1009034 | 174 | 0       | NE | 0       | NE | 0     | NE |
| M5005_Spy_1028c | -      | 1009037 | 1009669 | 210 | 0       | NE | 0       | NE | 0     | NE |
| M5005_Spy_1029c | -      | 1009671 | 1009955 | 94  | 0       | NE | 0       | NE | 0     | NE |
| M5005_Spy_1030c | -      | 1009952 | 1010146 | 64  | 0       | NE | 0       | NE | 0     | NE |
| M5005_Spy_1031c | -      | 1010119 | 1010358 | 79  | 0       | NE | 0       | NE | 0     | NE |
| M5005_Spy_1032c | -      | 1010355 | 1010600 | 81  | 0.00025 | NE | 0       | NE | 0     | NE |
| M5005_Spy_1033c | -      | 1010597 | 1010953 | 118 | 0       | NE | 0       | NE | 0     | NE |
| M5005_Spy_1034c | -      | 1010950 | 1011390 | 146 | 0       | NE | 0       | NE | 0     | NE |
| M5005_Spy_1035c | -      | 1011390 | 1011593 | 67  | 0       | NE | 0       | NE | 0     | NE |
| M5005_Spy_1036c | ssb2   | 1011599 | 1012024 | 141 | 0       | NE | 0       | NE | 0     | NE |
| M5005_Spy_1037c | ssb1   | 1012017 | 1012691 | 224 | 0.00025 | NE | 0       | NE | 0.001 | NE |
| M5005_Spy_1038c | -      | 1012692 | 1013174 | 160 | 0       | NE | 0       | NE | 0     | NE |
| M5005_Spy_1039c | -      | 1013196 | 1013450 | 84  | 0       | NE | 0       | NE | 0     | NE |
| M5005_Spy_1040c | -      | 1013431 | 1013784 | 117 | 0       | NE | 0       | NE | 0     | NE |
| M5005_Spy_1041c | -      | 1013797 | 1013934 | 45  | -1      | S  | -1      | S  | -1    | S  |
| M5005_Spy_1042c | -      | 1013925 | 1014707 | 260 | 0.91875 | U  | 0       | NE | 0.333 | U  |
| M5005_Spy_1043c | -      | 1014694 | 1015524 | 276 | 0       | NE | 0       | NE | 0     | NE |
| M5005_Spy_1044  | -      | 1015738 | 1016199 | 153 | 0.00025 | NE | 0       | NE | 0.001 | NE |
| M5005_Spy_1045c | -      | 1016649 | 1016849 | 66  | -1      | S  | -1      | S  | -1    | S  |
| M5005_Spy_1046  | -      | 1016923 | 1017309 | 128 | 0.00025 | NE | 0       | NE | 0     | NE |
| M5005_Spy_1047c | -      | 1017298 | 1017507 | 69  | 0       | NE | 0       | NE | 0     | NE |
| M5005_Spy_1048  | -      | 1017561 | 1018160 | 199 | 0.00025 | NE | 0       | NE | 0     | NE |
| M5005_Spy_1049c | -      | 1018190 | 1018348 | 52  | -1      | S  | -1      | S  | -1    | S  |
| M5005_Spy_1050  | -      | 1018705 | 1019529 | 274 | 0.0005  | NE | 0.0005  | NE | 1     | E  |
| M5005_Spy_1051  | -      | 1019565 | 1020458 | 297 | 0       | NE | 0       | NE | 0     | NE |
| M5005_Spy_1052  | int.1  | 1020579 | 1021667 | 362 | 0       | NE | 0       | NE | 0     | NE |
| M5005_Spy_1053  | -      | 1021799 | 1021912 | 37  | -1      | S  | -1      | S  | -1    | S  |
| M5005_Spy_1054  | -      | 1022030 | 1022650 | 206 | 0       | NE | 0       | NE | 0     | NE |
| M5005_Spy_1055c | glgP   | 1022907 | 1025171 | 754 | 0       | NE | 0       | NE | 0     | NE |
| M5005_Spy_1056c | malM   | 1025206 | 1026699 | 497 | 0       | NE | 0       | NE | 0     | NE |
| M5005_Spy_1057c | malR   | 1026814 | 1027833 | 339 | 0       | NE | 0       | NE | 0     | NE |
| M5005_Spy_1058  | malE   | 1027874 | 1029325 | 483 | 0       | NE | 0       | NE | 0     | NE |
| M5005_Spy_1059  | malF   | 1029830 | 1030960 | 376 | 0.00025 | NE | 0       | NE | 0.001 | NE |
| M5005_Spy_1060  | malG   | 1030960 | 1031796 | 278 | 0       | NE | 0       | NE | 0     | NE |
| M5005_Spy_1061  | -      | 1031951 | 1032751 | 266 | 0.00025 | NE | 0       | NE | 0     | NE |
| M5005_Spy_1062c | malA   | 1032867 | 1033682 | 271 | 0       | NE | 0       | NE | 0     | NE |
| M5005_Spy_1063c | malD   | 1033704 | 1034564 | 286 | 0.00025 | NE | 0       | NE | 0     | NE |
| M5005_Spy_1064c | malC   | 1034561 | 1035868 | 435 | 0       | NE | 0       | NE | 0     | NE |
| M5005_Spy_1065c | amyA   | 1035943 | 1038078 | 711 | 0       | NE | 0       | NE | 0     | NE |
| M5005_Spy_1066c | amyB   | 1038104 | 1039807 | 567 | 0.00025 | NE | 0       | NE | 0     | NE |
| M5005_Spy_1067c | malX   | 1039973 | 1041232 | 419 | 0       | NE | 0       | NE | 0     | NE |
| M5005_Spy_1068  | -      | 1041558 | 1041782 | 74  | 0       | NE | 0       | NE | 0     | NE |
| M5005_Spy_1069c | -      | 1041847 | 1042830 | 327 | 0       | NE | 0       | NE | 0     | NE |
| M5005_Spy_1070c | dltD   | 1042861 | 1044111 | 416 | 0       | NE | 0       | NE | 0.001 | NE |
| M5005_Spy_1071c | dltC   | 1044104 | 1044343 | 79  | 0       | NE | 0       | NE | 0     | NE |
| M5005_Spy_1072c | dltB   | 1044361 | 1045617 | 418 | 0       | NE | 0       | NE | 0     | NE |
| M5005_Spy_1073c | dltA   | 1045614 | 1047152 | 512 | 0       | NE | 0       | NE | 0     | NE |
| M5005_Spy_1074c | -      | 1047164 | 1047307 | 47  | -1      | S  | -1      | S  | -1    | S  |
| M5005_Spy_1075c | uvrB   | 1047571 | 1049562 | 663 | 0       | NE | 0       | NE | 0     | NE |
| M5005_Spy_1076  | glnH   | 1049755 | 1051929 | 724 | 1       | E  | 1       | E  | 1     | E  |
| M5005_Spy_1077  | glnQ.2 | 1051929 | 1052669 | 246 | 0.98675 | U  | 0.97275 | U  | 0.285 | U  |
| M5005_Spy_1078c | -      | 1052817 | 1052969 | 50  | -1      | S  | -1      | S  | -1    | S  |
| M5005_Spy_1079c | -      | 1052966 | 1054345 | 459 | 0       | NE | 0       | NE | 0     | NE |
| M5005_Spy_1080c | -      | 1054523 | 1054972 | 149 | 0       | NE | 0       | NE | 0     | NE |
| M5005_Spy_1081c | -      | 1054969 | 1055304 | 111 | 0       | NE | 0       | NE | 0     | NE |

|                 |        |         |         |     |         |    |        |    |       |    |
|-----------------|--------|---------|---------|-----|---------|----|--------|----|-------|----|
| M5005_Spy_1082c | -      | 1055307 | 1055618 | 103 | 0       | NE | 0      | NE | 0     | NE |
| M5005_Spy_1083c | -      | 1055641 | 1057635 | 664 | 0.014   | NE | 0      | NE | 0.197 | U  |
| M5005_Spy_1084c | -      | 1057741 | 1058835 | 364 | 0       | NE | 0      | NE | 0     | NE |
| M5005_Spy_1085c | bgIA.2 | 1058844 | 1060244 | 466 | 0       | NE | 0      | NE | 0     | NE |
| M5005_Spy_1086  | -      | 1060469 | 1061164 | 231 | 0       | NE | 0      | NE | 0     | NE |
| M5005_Spy_1087c | -      | 1061169 | 1061327 | 52  | -1      | S  | -1     | S  | -1    | S  |
| M5005_Spy_1088c | obgE   | 1061396 | 1062703 | 435 | 1       | E  | 1      | E  | 1     | E  |
| M5005_Spy_1089c | -      | 1062766 | 1062894 | 42  | -1      | S  | -1     | S  | -1    | S  |
| M5005_Spy_1090  | -      | 1063136 | 1063651 | 171 | 0       | NE | 0      | NE | 0     | NE |
| M5005_Spy_1091  | -      | 1063824 | 1064480 | 218 | 0       | NE | 0      | NE | 0     | NE |
| M5005_Spy_1092c | rsuA   | 1064529 | 1065263 | 244 | 0       | NE | 0      | NE | 0     | NE |
| M5005_Spy_1093  | -      | 1065375 | 1065740 | 121 | 0       | NE | 0      | NE | 0     | NE |
| M5005_Spy_1094c | -      | 1065860 | 1067080 | 406 | 0       | NE | 0      | NE | 0     | NE |
| M5005_Spy_1095  | -      | 1067382 | 1068938 | 518 | 0       | NE | 0      | NE | 0     | NE |
| M5005_Spy_1096c | -      | 1069045 | 1069446 | 133 | 0       | NE | 0      | NE | 0     | NE |
| M5005_Spy_1097c | -      | 1069531 | 1070043 | 170 | 0       | NE | 0      | NE | 0     | NE |
| M5005_Spy_1098c | -      | 1070348 | 1071703 | 451 | 0       | NE | 0      | NE | 0     | NE |
| M5005_Spy_1099c | psr    | 1071785 | 1073236 | 483 | 0       | NE | 0      | NE | 0     | NE |
| M5005_Spy_1100c | aroK   | 1073444 | 1073935 | 163 | 0       | NE | 0      | NE | 0     | NE |
| M5005_Spy_1101c | aroA1  | 1073928 | 1075220 | 430 | 0       | NE | 0      | NE | 0     | NE |
| M5005_Spy_1102c | -      | 1075322 | 1076287 | 321 | 0.00025 | NE | 0      | NE | 0.001 | NE |
| M5005_Spy_1103c | map    | 1076289 | 1077149 | 286 | 0.00025 | NE | 1      | E  | 1     | E  |
| M5005_Spy_1104c | -      | 1077165 | 1078448 | 427 | 0       | NE | 0      | NE | 0.001 | NE |
| M5005_Spy_1105c | -      | 1078457 | 1078999 | 180 | 0       | NE | 0      | NE | 0     | NE |
| M5005_Spy_1106c | grab   | 1079237 | 1079890 | 217 | 0       | NE | 0      | NE | 0     | NE |
| M5005_Spy_1107c | murZ   | 1080248 | 1081507 | 419 | 0       | NE | 0      | NE | 0.001 | NE |
| M5005_Spy_1108c | metK2  | 1081681 | 1082877 | 398 | 0.98925 | U  | 1      | E  | 1     | E  |
| M5005_Spy_1109c | inlA   | 1083414 | 1085792 | 792 | 0.00025 | NE | 0      | NE | 0     | NE |
| M5005_Spy_1110  | birA   | 1085996 | 1086937 | 313 | 0       | NE | 1      | E  | 1     | E  |
| M5005_Spy_1111c | -      | 1086912 | 1087220 | 102 | 0       | NE | 0      | NE | 0     | NE |
| M5005_Spy_1112c | dnaX   | 1087210 | 1088880 | 556 | 1       | E  | 1      | E  | 1     | E  |
| M5005_Spy_1113c | -      | 1088880 | 1089377 | 165 | 0       | NE | 0      | NE | 0     | NE |
| M5005_Spy_1114  | -      | 1089522 | 1090331 | 269 | 0       | NE | 0      | NE | 0     | NE |
| M5005_Spy_1115c | -      | 1090384 | 1090647 | 87  | 0       | NE | 0      | NE | 0     | NE |
| M5005_Spy_1116c | udk    | 1090727 | 1091353 | 208 | 0       | NE | 0      | NE | 0     | NE |
| M5005_Spy_1117  | deaD2  | 1091451 | 1092536 | 361 | 0       | NE | 0      | NE | 0     | NE |
| M5005_Spy_1118c | -      | 1092700 | 1093920 | 406 | 0.00025 | NE | 0      | NE | 0     | NE |
| M5005_Spy_1119c | gapN   | 1094015 | 1095442 | 475 | 1       | E  | 1      | E  | 1     | E  |
| M5005_Spy_1120c | pstI   | 1095627 | 1097360 | 577 | 0       | NE | 0.9685 | U  | 1     | E  |
| M5005_Spy_1121c | ptsH   | 1097365 | 1097628 | 87  | 0.97675 | U  | 0      | NE | 0.998 | E  |
| M5005_Spy_1122  | nrdH   | 1098021 | 1098239 | 72  | 0       | NE | 0      | NE | 0.001 | NE |
| M5005_Spy_1123  | nrdE.2 | 1098259 | 1100418 | 719 | 0       | NE | 0      | NE | 0     | NE |
| M5005_Spy_1124  | nrdF   | 1100751 | 1101710 | 319 | 0       | NE | 0      | NE | 0     | NE |
| M5005_Spy_1125  | -      | 1101685 | 1102998 | 437 | 0       | NE | 0      | NE | 0     | NE |
| M5005_Spy_1129c | -      | 1104384 | 1105079 | 231 | 0       | NE | 0      | NE | 0     | NE |
| M5005_Spy_1130c | -      | 1105098 | 1105859 | 253 | 0       | NE | 0      | NE | 0     | NE |
| M5005_Spy_1131c | -      | 1105856 | 1106077 | 73  | 0.064   | U  | 0      | NE | 0     | NE |
| M5005_Spy_1132c | alaS   | 1106432 | 1109050 | 872 | 1       | E  | 1      | E  | 1     | E  |
| M5005_Spy_1133c | prsA   | 1109437 | 1110492 | 351 | 0       | NE | 0      | NE | 0     | NE |
| M5005_Spy_1134c | -      | 1110555 | 1111262 | 235 | 0       | NE | 0      | NE | 0     | NE |
| M5005_Spy_1135c | -      | 1111328 | 1112524 | 398 | 0       | NE | 0      | NE | 0     | NE |
| M5005_Spy_1136c | pepB   | 1112900 | 1114705 | 601 | 0       | NE | 0      | NE | 0     | NE |
| M5005_Spy_1137c | -      | 1114718 | 1115680 | 320 | 0       | NE | 0      | NE | 0     | NE |
| M5005_Spy_1138c | -      | 1115975 | 1116691 | 238 | 0.00025 | NE | 0      | NE | 0     | NE |
| M5005_Spy_1139c | nagB   | 1116810 | 1117514 | 234 | 0       | NE | 0      | NE | 0     | NE |
| M5005_Spy_1140  | queA   | 1117716 | 1118744 | 342 | 0       | NE | 0      | NE | 0.001 | NE |
| M5005_Spy_1141  | -      | 1118751 | 1119971 | 406 | 0.00025 | NE | 0      | NE | 0     | NE |
| M5005_Spy_1142c | -      | 1120085 | 1120675 | 196 | 0       | NE | 0      | NE | 0     | NE |
| M5005_Spy_1143c | -      | 1120672 | 1120920 | 82  | 0       | NE | 0      | NE | 0     | NE |
| M5005_Spy_1144c | -      | 1120905 | 1121132 | 75  | 0       | NE | 0      | NE | 0     | NE |
| M5005_Spy_1145c | sodA   | 1121299 | 1121904 | 201 | 0       | NE | 0      | NE | 0     | NE |
| M5005_Spy_1146c | holA   | 1122001 | 1123041 | 346 | 1       | E  | 1      | E  | 1     | E  |
| M5005_Spy_1147c | comEC  | 1123112 | 1125355 | 747 | 0.00025 | NE | 0      | NE | 0     | NE |

|                 |      |         |         |     |         |    |    |    |       |    |
|-----------------|------|---------|---------|-----|---------|----|----|----|-------|----|
| M5005_Spy_1148c | comE | 1125336 | 1125998 | 220 | 0.00025 | NE | 0  | NE | 0     | NE |
| M5005_Spy_1149c | -    | 1126198 | 1126938 | 246 | 0.99725 | E  | 1  | E  | 1     | E  |
| M5005_Spy_1150  | -    | 1127056 | 1127832 | 258 | 0       | NE | 0  | NE | 0     | NE |
| M5005_Spy_1151  | -    | 1127822 | 1128100 | 92  | 0       | NE | 0  | NE | 0     | NE |
| M5005_Spy_1152c | kup  | 1128124 | 1129107 | 327 | 0       | NE | 0  | NE | 0     | NE |
| M5005_Spy_1154c | deaD | 1130251 | 1131870 | 539 | 0       | NE | 0  | NE | 0     | NE |
| M5005_Spy_1155c | prfC | 1132177 | 1133721 | 514 | 0.00025 | NE | 0  | NE | 0     | NE |
| M5005_Spy_1156c | -    | 1133969 | 1134664 | 231 | 0       | NE | 0  | NE | 0     | NE |
| M5005_Spy_1157c | murF | 1134744 | 1136135 | 463 | 1       | E  | 1  | E  | 1     | E  |
| M5005_Spy_1158c | ddl  | 1136326 | 1137372 | 348 | 0.6055  | U  | 1  | E  | 1     | E  |
| M5005_Spy_1159c | recR | 1137473 | 1138069 | 198 | 0.00025 | NE | 0  | NE | 0.001 | NE |
| M5005_Spy_1160c | -    | 1138116 | 1138307 | 63  | 0       | NE | 0  | NE | 0     | NE |
| M5005_Spy_1161c | fdhC | 1138868 | 1139647 | 259 | 0       | NE | 0  | NE | 0     | NE |
| M5005_Spy_1162c | -    | 1139771 | 1140313 | 180 | 0       | NE | 0  | NE | 0     | NE |
| M5005_Spy_1163c | -    | 1140474 | 1140995 | 173 | 0       | NE | 0  | NE | 0     | NE |
| M5005_Spy_1164c | gpmA | 1141102 | 1141797 | 231 | 0.99975 | E  | 1  | E  | 0.481 | U  |
| M5005_Spy_1165  | pyrD | 1142036 | 1142971 | 311 | 0.00025 | NE | 0  | NE | 0     | NE |
| M5005_Spy_1166c | -    | 1143026 | 1143199 | 57  | -1      | S  | -1 | S  | -1    | S  |
| M5005_Spy_1167c | -    | 1143271 | 1145133 | 620 | 0       | NE | 0  | NE | 0     | NE |
| M5005_Spy_1168c | -    | 1145664 | 1145846 | 60  | -1      | S  | -1 | S  | -1    | S  |
| M5005_Spy_1169  | spd3 | 1146085 | 1146885 | 266 | 0       | NE | 0  | NE | 0     | NE |
| M5005_Spy_1170  | -    | 1147096 | 1147590 | 164 | 0       | NE | 0  | NE | 0     | NE |
| M5005_Spy_1171c | -    | 1147660 | 1148865 | 401 | 0       | NE | 0  | NE | 0     | NE |
| M5005_Spy_1172c | -    | 1148981 | 1149208 | 75  | 0       | NE | 0  | NE | 0     | NE |
| M5005_Spy_1173c | -    | 1149205 | 1149480 | 91  | 0       | NE | 0  | NE | 0     | NE |
| M5005_Spy_1174c | -    | 1149490 | 1150107 | 205 | 0       | NE | 0  | NE | 0     | NE |
| M5005_Spy_1175c | -    | 1150104 | 1150541 | 145 | 0       | NE | 0  | NE | 0     | NE |
| M5005_Spy_1176c | -    | 1150553 | 1152421 | 622 | 0       | NE | 0  | NE | 0     | NE |
| M5005_Spy_1177c | -    | 1152418 | 1153113 | 231 | 0       | NE | 0  | NE | 0     | NE |
| M5005_Spy_1178c | -    | 1153110 | 1155467 | 785 | 0       | NE | 0  | NE | 0     | NE |
| M5005_Spy_1179c | -    | 1155467 | 1155838 | 123 | 0       | NE | 0  | NE | 0     | NE |
| M5005_Spy_1180c | -    | 1155853 | 1156116 | 87  | 0       | NE | 0  | NE | 0     | NE |
| M5005_Spy_1181c | -    | 1156127 | 1156720 | 197 | 0       | NE | 0  | NE | 0     | NE |
| M5005_Spy_1182c | -    | 1156732 | 1157067 | 111 | 0       | NE | 0  | NE | 0     | NE |
| M5005_Spy_1183c | -    | 1157068 | 1157304 | 78  | 0       | NE | 0  | NE | 0     | NE |
| M5005_Spy_1184c | -    | 1157297 | 1157635 | 112 | 0.00025 | NE | 0  | NE | 0     | NE |
| M5005_Spy_1185c | -    | 1157595 | 1158017 | 140 | 0       | NE | 0  | NE | 0     | NE |
| M5005_Spy_1186c | -    | 1158027 | 1158227 | 66  | 0       | NE | 0  | NE | 0     | NE |
| M5005_Spy_1187c | -    | 1158227 | 1159138 | 303 | 0.00025 | NE | 0  | NE | 0     | NE |
| M5005_Spy_1188c | -    | 1159163 | 1159624 | 153 | 0       | NE | 0  | NE | 0     | NE |
| M5005_Spy_1189c | -    | 1159705 | 1161120 | 471 | 0.00025 | NE | 0  | NE | 0     | NE |
| M5005_Spy_1190c | -    | 1161230 | 1161496 | 88  | 0       | NE | 0  | NE | 0     | NE |
| M5005_Spy_1191c | -    | 1161535 | 1161750 | 71  | 0       | NE | 0  | NE | 0     | NE |
| M5005_Spy_1192c | -    | 1161719 | 1161952 | 77  | 0       | NE | 0  | NE | 0     | NE |
| M5005_Spy_1193c | -    | 1161949 | 1163442 | 497 | 0       | NE | 0  | NE | 0     | NE |
| M5005_Spy_1194c | -    | 1163435 | 1164703 | 422 | 0.00025 | NE | 0  | NE | 0     | NE |
| M5005_Spy_1195c | -    | 1164700 | 1165056 | 118 | 0.00025 | NE | 0  | NE | 0     | NE |
| M5005_Spy_1196c | -    | 1165205 | 1165549 | 114 | 0       | NE | 0  | NE | 0     | NE |
| M5005_Spy_1197c | -    | 1165658 | 1166077 | 139 | 0       | NE | 0  | NE | 0     | NE |
| M5005_Spy_1198c | -    | 1166345 | 1166980 | 211 | 0       | NE | 0  | NE | 0     | NE |
| M5005_Spy_1199c | -    | 1166982 | 1167251 | 89  | 0       | NE | 0  | NE | 0     | NE |
| M5005_Spy_1200c | -    | 1167335 | 1167847 | 170 | 0.00025 | NE | 0  | NE | 0     | NE |
| M5005_Spy_1201c | -    | 1167844 | 1168257 | 137 | 0       | NE | 0  | NE | 0     | NE |
| M5005_Spy_1202c | -    | 1168363 | 1168530 | 55  | -1      | S  | -1 | S  | -1    | S  |
| M5005_Spy_1203c | -    | 1168540 | 1169337 | 265 | 0       | NE | 0  | NE | 0     | NE |
| M5005_Spy_1204c | -    | 1169334 | 1170263 | 309 | 0.00025 | NE | 0  | NE | 0.001 | NE |
| M5005_Spy_1205c | -    | 1170266 | 1170595 | 109 | 0       | NE | 0  | NE | 0     | NE |
| M5005_Spy_1206c | -    | 1170651 | 1170857 | 68  | 0       | NE | 0  | NE | 0     | NE |
| M5005_Spy_1207c | -    | 1170866 | 1171006 | 46  | -1      | S  | -1 | S  | -1    | S  |
| M5005_Spy_1208c | -    | 1171003 | 1171236 | 77  | 0       | NE | 0  | NE | 0     | NE |
| M5005_Spy_1209c | -    | 1171217 | 1171606 | 129 | 0.00025 | NE | 0  | NE | 0     | NE |
| M5005_Spy_1210c | -    | 1171751 | 1171990 | 79  | 0       | NE | 0  | NE | 0.001 | NE |
| M5005_Spy_1211c | -    | 1172090 | 1172275 | 61  | -1      | S  | -1 | S  | -1    | S  |

|                 |            |         |         |     |         |    |         |    |       |    |
|-----------------|------------|---------|---------|-----|---------|----|---------|----|-------|----|
| M5005_Spy_1212c | xis        | 1172277 | 1172588 | 103 | 0.00025 | NE | 0       | NE | 0     | NE |
| M5005_Spy_1213c | -          | 1172666 | 1172851 | 61  | 0.1975  | U  | 0       | NE | 0     | NE |
| M5005_Spy_1214  | -          | 1173018 | 1173257 | 79  | 0       | NE | 0       | NE | 0     | NE |
| M5005_Spy_1215  | -          | 1173399 | 1174205 | 268 | 0.00025 | NE | 0       | NE | 0     | NE |
| M5005_Spy_1216c | -          | 1174140 | 1174406 | 88  | 0       | NE | 0       | NE | 0     | NE |
| M5005_Spy_1217c | -          | 1174438 | 1175154 | 238 | 0.00475 | NE | 0       | NE | 0.001 | NE |
| M5005_Spy_1218c | -          | 1175166 | 1175357 | 63  | 0       | NE | 0       | NE | 0     | NE |
| M5005_Spy_1219  | -          | 1176511 | 1176858 | 115 | 0.99975 | E  | 1       | E  | 1     | E  |
| M5005_Spy_1220  | -          | 1176862 | 1177242 | 126 | 0       | NE | 0       | NE | 0     | NE |
| M5005_Spy_1221  | -          | 1177254 | 1177520 | 88  | 0       | NE | 0       | NE | 0     | NE |
| M5005_Spy_1222  | int.2      | 1177644 | 1178786 | 380 | 0       | NE | 0       | NE | 0     | NE |
| M5005_Spy_1223c | -          | 1178876 | 1179151 | 91  | 0.984   | U  | 1       | E  | 0.98  | U  |
| M5005_Spy_1224c | -          | 1179250 | 1179837 | 195 | 0       | NE | 0       | NE | 0     | NE |
| M5005_Spy_1225c | -          | 1179815 | 1180657 | 280 | 0       | NE | 0       | NE | 0     | NE |
| M5005_Spy_1226c | -          | 1180650 | 1181501 | 283 | 0       | NE | 0       | NE | 0     | NE |
| M5005_Spy_1227c | -          | 1181717 | 1182658 | 313 | 0       | NE | 0       | NE | 0     | NE |
| M5005_Spy_1228c | recN       | 1182830 | 1184491 | 553 | 0       | NE | 0       | NE | 0     | NE |
| M5005_Spy_1229c | argR1      | 1184513 | 1184983 | 156 | 0       | NE | 0       | NE | 0     | NE |
| M5005_Spy_1230c | -          | 1184970 | 1185797 | 275 | 0       | NE | 0       | NE | 0     | NE |
| M5005_Spy_1231c | fps        | 1185790 | 1186662 | 290 | 0       | NE | 0       | NE | 0     | NE |
| M5005_Spy_1232c | xseB       | 1186662 | 1186877 | 71  | 0.782   | U  | 0       | NE | 0     | NE |
| M5005_Spy_1233c | xseA       | 1186855 | 1188195 | 446 | 0.00025 | NE | 0       | NE | 0     | NE |
| M5005_Spy_1234c | folD       | 1188348 | 1189202 | 284 | 0       | NE | 0.00025 | NE | 1     | E  |
| M5005_Spy_1235c | -          | 1189410 | 1191113 | 567 | 0       | NE | 0       | NE | 0     | NE |
| M5005_Spy_1236c | phr        | 1191282 | 1192691 | 469 | 0       | NE | 0       | NE | 0     | NE |
| M5005_Spy_1237c | artP/gtr   | 1192840 | 1193574 | 244 | 0.04    | NE | 0       | NE | 0     | NE |
| M5005_Spy_1238c | artQ       | 1193574 | 1194260 | 228 | 0       | NE | 0       | NE | 0     | NE |
| M5005_Spy_1239c | -          | 1194387 | 1194617 | 76  | 0.45    | U  | 0.00425 | NE | 0.954 | U  |
| M5005_Spy_1240  | clpE       | 1194915 | 1197197 | 760 | 0       | NE | 0       | NE | 0     | NE |
| M5005_Spy_1241  | mutT       | 1197325 | 1197780 | 151 | 0       | NE | 0       | NE | 0     | NE |
| M5005_Spy_1242  | -          | 1197831 | 1198133 | 100 | 0       | NE | 0       | NE | 0     | NE |
| M5005_Spy_1243c | ileS       | 1198398 | 1201199 | 933 | 0.99775 | E  | 1       | E  | 1     | E  |
| M5005_Spy_1244c | divIVAS    | 1201472 | 1202230 | 252 | 0.00025 | NE | 1       | E  | 1     | E  |
| M5005_Spy_1245c | -          | 1202240 | 1203031 | 263 | 0       | NE | 0       | NE | 0     | NE |
| M5005_Spy_1246c | -          | 1203031 | 1203285 | 84  | 0.00025 | NE | 0       | NE | 0.161 | U  |
| M5005_Spy_1247c | -          | 1203290 | 1203958 | 222 | 0.00025 | NE | 0       | NE | 0.001 | NE |
| M5005_Spy_1248c | -          | 1203958 | 1204629 | 223 | 0       | NE | 0.00025 | NE | 0.001 | NE |
| M5005_Spy_1249c | ftsZ       | 1204632 | 1205951 | 439 | 0.9745  | U  | 1       | E  | 1     | E  |
| M5005_Spy_1250c | ftsA       | 1205975 | 1207339 | 454 | 1       | E  | 1       | E  | 1     | E  |
| M5005_Spy_1251c | divIB/ftsQ | 1207551 | 1208699 | 382 | 0.00075 | NE | 0.7875  | U  | 0.002 | NE |
| M5005_Spy_1252c | murG       | 1208700 | 1209803 | 367 | 1       | E  | 1       | E  | 1     | E  |
| M5005_Spy_1253c | murD       | 1209782 | 1211140 | 452 | 1       | E  | 1       | E  | 1     | E  |
| M5005_Spy_1254c | -          | 1211510 | 1211761 | 83  | 0       | NE | 0       | NE | 0     | NE |
| M5005_Spy_1255c | typA       | 1211883 | 1213724 | 613 | 0.00025 | NE | 0       | NE | 0.303 | U  |
| M5005_Spy_1256c | -          | 1213907 | 1214296 | 129 | 0       | NE | 0       | NE | 0     | NE |
| M5005_Spy_1257c | glcK       | 1214306 | 1215277 | 323 | 0.00025 | NE | 0       | NE | 0     | NE |
| M5005_Spy_1258c | -          | 1215282 | 1215485 | 67  | 0       | NE | 0       | NE | 0     | NE |
| M5005_Spy_1259c | dpr        | 1215627 | 1216154 | 175 | 0       | NE | 0       | NE | 0     | NE |
| M5005_Spy_1260  | -          | 1216382 | 1217008 | 208 | 0       | NE | 0       | NE | 0     | NE |
| M5005_Spy_1261c | -          | 1217090 | 1218169 | 359 | 0       | NE | 0       | NE | 0     | NE |
| M5005_Spy_1262c | -          | 1218173 | 1218793 | 206 | 0       | NE | 0       | NE | 0     | NE |
| M5005_Spy_1263c | -          | 1219088 | 1219207 | 39  | -1      | S  | -1      | S  | -1    | S  |
| M5005_Spy_1264c | -          | 1219241 | 1219942 | 233 | 0       | NE | 0       | NE | 0     | NE |
| M5005_Spy_1265c | -          | 1220035 | 1220265 | 76  | 0.00025 | NE | 0       | NE | 0     | NE |
| M5005_Spy_1266c | -          | 1220631 | 1221668 | 345 | 0       | NE | 0       | NE | 0     | NE |
| M5005_Spy_1267c | coaD       | 1221655 | 1222146 | 163 | 0.338   | U  | 1       | E  | 1     | E  |
| M5005_Spy_1268c | -          | 1222136 | 1222675 | 179 | 0       | NE | 0       | NE | 0     | NE |
| M5005_Spy_1269c | asnA       | 1222798 | 1223790 | 330 | 0       | NE | 0       | NE | 0     | NE |
| M5005_Spy_1270c | arcC       | 1224103 | 1225053 | 316 | 0.0005  | NE | 0       | NE | 0.001 | NE |
| M5005_Spy_1271c | -          | 1225073 | 1226404 | 443 | 0       | NE | 0       | NE | 0.001 | NE |
| M5005_Spy_1272c | -          | 1226421 | 1227914 | 497 | 0       | NE | 0       | NE | 0     | NE |
| M5005_Spy_1273c | arcB       | 1228084 | 1229097 | 337 | 0       | NE | 0       | NE | 0     | NE |
| M5005_Spy_1274c | -          | 1229137 | 1229565 | 142 | 0       | NE | 0       | NE | 0     | NE |

|                 |             |         |         |      |         |    |        |    |       |    |
|-----------------|-------------|---------|---------|------|---------|----|--------|----|-------|----|
| M5005_Spy_1275c | arcA        | 1229665 | 1230900 | 411  | 0       | NE | 0      | NE | 0     | NE |
| M5005_Spy_1276c | -           | 1231174 | 1231854 | 226  | 0       | NE | 0      | NE | 0.001 | NE |
| M5005_Spy_1277  | ahrC.2/argR | 1231996 | 1232469 | 157  | 0       | NE | 0      | NE | 0     | NE |
| M5005_Spy_1278c | -           | 1232635 | 1233351 | 238  | 0       | NE | 0      | NE | 0     | NE |
| M5005_Spy_1279c | -           | 1233365 | 1234444 | 359  | 0       | NE | 0      | NE | 0     | NE |
| M5005_Spy_1280c | yesM        | 1234517 | 1236250 | 577  | 0.535   | U  | 0      | NE | 0     | NE |
| M5005_Spy_1281c | yesN        | 1236247 | 1236987 | 246  | 0       | NE | 0      | NE | 0.001 | NE |
| M5005_Spy_1282c | msrA        | 1237075 | 1238181 | 368  | 0.00025 | NE | 0      | NE | 0.001 | NE |
| M5005_Spy_1283c | tlpA        | 1238224 | 1238847 | 207  | 0       | NE | 0      | NE | 0     | NE |
| M5005_Spy_1284c | ccdA        | 1238860 | 1239570 | 236  | 0       | NE | 0      | NE | 0     | NE |
| M5005_Spy_1285c | -           | 1240173 | 1240466 | 97   | 0       | NE | 0      | NE | 0     | NE |
| M5005_Spy_1286c | -           | 1240477 | 1241502 | 341  | 0       | NE | 0      | NE | 0     | NE |
| M5005_Spy_1287c | -           | 1241499 | 1242173 | 224  | 0       | NE | 0      | NE | 0     | NE |
| M5005_Spy_1288c | -           | 1242175 | 1243023 | 282  | 0       | NE | 0      | NE | 0     | NE |
| M5005_Spy_1289c | -           | 1243028 | 1244923 | 631  | 0.00025 | NE | 0      | NE | 0     | NE |
| M5005_Spy_1290c | -           | 1244923 | 1245651 | 242  | 0       | NE | 0      | NE | 0     | NE |
| M5005_Spy_1291c | -           | 1245784 | 1248186 | 800  | 0       | NE | 0      | NE | 0     | NE |
| M5005_Spy_1292c | valS        | 1248346 | 1250751 | 801  | 1       | E  | 1      | E  | 1     | E  |
| M5005_Spy_1293c | -           | 1250995 | 1251558 | 187  | 0       | NE | 0      | NE | 0     | NE |
| M5005_Spy_1294c | -           | 1251555 | 1251734 | 59   | -1      | S  | -1     | S  | -1    | S  |
| M5005_Spy_1295c | -           | 1252159 | 1252554 | 131  | 0       | NE | 0      | NE | 0     | NE |
| M5005_Spy_1296c | -           | 1252572 | 1252826 | 84   | 0       | NE | 0      | NE | 0     | NE |
| M5005_Spy_1297  | aroA2       | 1253305 | 1254057 | 250  | 0.00025 | NE | 0      | NE | 0     | NE |
| M5005_Spy_1298  | aroB        | 1254113 | 1255186 | 357  | 0       | NE | 0      | NE | 0     | NE |
| M5005_Spy_1299c | -           | 1255455 | 1255613 | 52   | 0       | NE | 0      | NE | 0     | NE |
| M5005_Spy_1300c | -           | 1255621 | 1255926 | 101  | 0       | NE | 0      | NE | 0     | NE |
| M5005_Spy_1301c | -           | 1255928 | 1256266 | 112  | 0       | NE | 0      | NE | 0     | NE |
| M5005_Spy_1302c | -           | 1256319 | 1257074 | 251  | 0       | NE | 0      | NE | 0     | NE |
| M5005_Spy_1303c | aroE        | 1257309 | 1258187 | 292  | 0       | NE | 0      | NE | 0     | NE |
| M5005_Spy_1304c | lacZ        | 1258325 | 1261741 | 1138 | 0       | NE | 0      | NE | 0     | NE |
| M5005_Spy_1305c | trxR        | 1261761 | 1263245 | 494  | 0       | NE | 0      | NE | 0.001 | NE |
| M5005_Spy_1306c | trxS        | 1263245 | 1264969 | 574  | 0       | NE | 0      | NE | 0     | NE |
| M5005_Spy_1307c | trxT        | 1264959 | 1265564 | 201  | 0       | NE | 0      | NE | 0     | NE |
| M5005_Spy_1308c | -           | 1265870 | 1267315 | 481  | 0       | NE | 0      | NE | 0     | NE |
| M5005_Spy_1309c | -           | 1267396 | 1268322 | 308  | 0       | NE | 0      | NE | 0     | NE |
| M5005_Spy_1310c | -           | 1268332 | 1269282 | 316  | 0       | NE | 0      | NE | 0     | NE |
| M5005_Spy_1311  | -           | 1269478 | 1270356 | 292  | 0       | NE | 0      | NE | 0     | NE |
| M5005_Spy_1312  | -           | 1270500 | 1270622 | 40   | -1      | S  | -1     | S  | -1    | S  |
| M5005_Spy_1313c | -           | 1270968 | 1272410 | 480  | 0       | NE | 0      | NE | 0     | NE |
| M5005_Spy_1314c | hyl         | 1272434 | 1274128 | 564  | 0       | NE | 0      | NE | 0.001 | NE |
| M5005_Spy_1315c | -           | 1274179 | 1275219 | 346  | 0.00025 | NE | 0      | NE | 0     | NE |
| M5005_Spy_1316  | -           | 1275352 | 1276638 | 428  | 0.002   | NE | 0      | NE | 0     | NE |
| M5005_Spy_1317  | -           | 1276653 | 1279358 | 901  | 0.001   | NE | 0      | NE | 0     | NE |
| M5005_Spy_1318c | rocA        | 1279459 | 1280814 | 451  | 0       | NE | 0      | NE | 0     | NE |
| M5005_Spy_1319c | -           | 1281479 | 1282834 | 451  | 0       | NE | 0      | NE | 0.001 | NE |
| M5005_Spy_1320  | recX        | 1282949 | 1283725 | 258  | 0       | NE | 0      | NE | 0     | NE |
| M5005_Spy_1321  | -           | 1283805 | 1284338 | 177  | 0.00025 | NE | 0      | NE | 1     | E  |
| M5005_Spy_1322c | -           | 1284437 | 1284586 | 49   | -1      | S  | -1     | S  | -1    | S  |
| M5005_Spy_1323  | -           | 1284708 | 1284986 | 92   | 0       | NE | 0      | NE | 0     | NE |
| M5005_Spy_1324  | -           | 1291239 | 1291373 | 44   | -1      | S  | -1     | S  | -1    | S  |
| M5005_Spy_1325c | -           | 1292030 | 1292578 | 182  | 0       | NE | 0      | NE | 0     | NE |
| M5005_Spy_1326c | comFC       | 1292658 | 1293323 | 221  | 0.00025 | NE | 0      | NE | 0     | NE |
| M5005_Spy_1327c | comFA       | 1293295 | 1294509 | 404  | 0       | NE | 0      | NE | 0     | NE |
| M5005_Spy_1328  | -           | 1294676 | 1295308 | 210  | 0.00025 | NE | 0      | NE | 0     | NE |
| M5005_Spy_1329  | cysM        | 1295436 | 1296377 | 313  | 0.00025 | NE | 0      | NE | 0     | NE |
| M5005_Spy_1330c | -           | 1296395 | 1296772 | 125  | 0.00025 | NE | 0      | NE | 1     | E  |
| M5005_Spy_1331c | -           | 1296772 | 1298172 | 466  | 0       | NE | 0      | NE | 0     | NE |
| M5005_Spy_1332c | yvqC        | 1298209 | 1298850 | 213  | 0       | NE | 0      | NE | 0.901 | U  |
| M5005_Spy_1333c | yvqE        | 1298843 | 1299847 | 334  | 0       | NE | 0      | NE | 0     | NE |
| M5005_Spy_1334c | yvqF        | 1299844 | 1300536 | 230  | 0.00025 | NE | 0      | NE | 0     | NE |
| M5005_Spy_1335c | -           | 1300659 | 1302557 | 632  | 1       | E  | 1      | E  | 1     | E  |
| M5005_Spy_1336c | pppL        | 1302554 | 1303294 | 246  | 0.003   | NE | 0.9995 | E  | 1     | E  |
| M5005_Spy_1337c | sunL        | 1303332 | 1304654 | 440  | 0       | NE | 0      | NE | 0     | NE |

|                 |        |         |         |     |         |    |       |    |       |    |
|-----------------|--------|---------|---------|-----|---------|----|-------|----|-------|----|
| M5005_Spy_1338c | fmt    | 1304644 | 1305579 | 311 | 0.87975 | U  | 1     | E  | 1     | E  |
| M5005_Spy_1339c | priA   | 1305641 | 1308025 | 794 | 0.00025 | NE | 0     | NE | 0.997 | E  |
| M5005_Spy_1340c | -      | 1308090 | 1308407 | 105 | 0       | NE | 0     | NE | 0     | NE |
| M5005_Spy_1341c | gmK    | 1308423 | 1309058 | 211 | 0.08825 | U  | 1     | E  | 0.998 | E  |
| M5005_Spy_1342c | -      | 1309168 | 1310775 | 535 | 0.10175 | U  | 0     | NE | 0     | NE |
| M5005_Spy_1343c | -      | 1310905 | 1311801 | 298 | 0       | NE | 0     | NE | 0     | NE |
| M5005_Spy_1344  | atoB   | 1312003 | 1313190 | 395 | 0       | NE | 0     | NE | 0     | NE |
| M5005_Spy_1345  | atoD.1 | 1313214 | 1313864 | 216 | 0       | NE | 0     | NE | 0     | NE |
| M5005_Spy_1346  | atoA   | 1313866 | 1314525 | 219 | 0.00025 | NE | 0     | NE | 0.001 | NE |
| M5005_Spy_1347  | -      | 1314558 | 1315337 | 259 | 0       | NE | 0     | NE | 0     | NE |
| M5005_Spy_1348  | -      | 1315408 | 1316739 | 443 | 0.00025 | NE | 0     | NE | 0     | NE |
| M5005_Spy_1349  | luxS   | 1316723 | 1317295 | 190 | 0.00025 | NE | 0     | NE | 0     | NE |
| M5005_Spy_1350c | -      | 1317440 | 1318909 | 489 | 0       | NE | 0     | NE | 0     | NE |
| M5005_Spy_1351c | -      | 1318923 | 1320077 | 384 | 0       | NE | 0     | NE | 0     | NE |
| M5005_Spy_1352c | -      | 1320522 | 1320848 | 108 | 0.8855  | U  | 0.808 | U  | 0.066 | U  |
| M5005_Spy_1353c | -      | 1320970 | 1321485 | 171 | 0.00025 | NE | 0     | NE | 0     | NE |
| M5005_Spy_1354  | recU   | 1321566 | 1322165 | 199 | 0.00025 | NE | 0     | NE | 0.001 | NE |
| M5005_Spy_1355  | pbp1A  | 1322152 | 1324317 | 721 | 1       | E  | 1     | E  | 1     | E  |
| M5005_Spy_1356c | pepC   | 1324784 | 1326121 | 445 | 0       | NE | 0     | NE | 0     | NE |
| M5005_Spy_1357c | nadE   | 1326306 | 1327130 | 274 | 0.948   | U  | 1     | E  | 1     | E  |
| M5005_Spy_1358c | nadE   | 1327132 | 1328586 | 484 | 0.999   | E  | 1     | E  | 1     | E  |
| M5005_Spy_1359c | -      | 1328757 | 1330136 | 459 | 0       | NE | 0     | NE | 0     | NE |
| M5005_Spy_1360c | -      | 1330305 | 1331222 | 305 | 0.00025 | NE | 0     | NE | 1     | E  |
| M5005_Spy_1361c | aapA   | 1331286 | 1331510 | 74  | 0.00025 | NE | 1     | E  | 1     | E  |
| M5005_Spy_1362c | -      | 1331614 | 1332360 | 248 | 0.00025 | NE | 0     | NE | 0     | NE |
| M5005_Spy_1363c | -      | 1332357 | 1333160 | 267 | 0       | NE | 0     | NE | 0     | NE |
| M5005_Spy_1364c | -      | 1333355 | 1334698 | 447 | 1       | E  | 1     | E  | 0.999 | E  |
| M5005_Spy_1365c | mraY   | 1334856 | 1335866 | 336 | 1       | E  | 1     | E  | 1     | E  |
| M5005_Spy_1366c | ftsI   | 1335868 | 1338123 | 751 | 0.98025 | U  | 1     | E  | 1     | E  |
| M5005_Spy_1367c | ftsL   | 1338127 | 1338450 | 107 | 0.00025 | NE | 1     | E  | 1     | E  |
| M5005_Spy_1368c | mraW   | 1338455 | 1339468 | 337 | 0       | NE | 0     | NE | 1     | E  |
| M5005_Spy_1369c | -      | 1339492 | 1339599 | 35  | -1      | S  | -1    | S  | -1    | S  |
| M5005_Spy_1370c | proA   | 1339942 | 1341192 | 416 | 0       | NE | 0     | NE | 0     | NE |
| M5005_Spy_1371c | proB   | 1341185 | 1342006 | 273 | 0       | NE | 0     | NE | 0     | NE |
| M5005_Spy_1372c | proB   | 1342071 | 1343699 | 542 | 0       | NE | 0     | NE | 0     | NE |
| M5005_Spy_1373c | -      | 1343704 | 1344438 | 244 | 0       | NE | 0     | NE | 0     | NE |
| M5005_Spy_1374c | -      | 1344472 | 1344738 | 88  | 0       | NE | 0     | NE | 0     | NE |
| M5005_Spy_1375c | tkk    | 1344931 | 1346916 | 661 | 0       | NE | 0     | NE | 0.004 | NE |
| M5005_Spy_1376c | tal    | 1347134 | 1347778 | 214 | 0       | NE | 0     | NE | 0     | NE |
| M5005_Spy_1377c | -      | 1347904 | 1349403 | 499 | 0       | NE | 0     | NE | 0     | NE |
| M5005_Spy_1378c | npx    | 1349393 | 1350739 | 448 | 0       | NE | 0     | NE | 0     | NE |
| M5005_Spy_1379c | glpF   | 1350848 | 1351549 | 233 | 0       | NE | 0     | NE | 0     | NE |
| M5005_Spy_1380c | glpO   | 1351551 | 1353389 | 612 | 0.00025 | NE | 0     | NE | 0     | NE |
| M5005_Spy_1381c | glpK   | 1353405 | 1354931 | 508 | 0       | NE | 0     | NE | 0     | NE |
| M5005_Spy_1382c | -      | 1355292 | 1355684 | 130 | 0       | NE | 0     | NE | 0     | NE |
| M5005_Spy_1383c | -      | 1355811 | 1356068 | 85  | 0       | NE | 0     | NE | 0.306 | U  |
| M5005_Spy_1384c | glyS   | 1356222 | 1358261 | 679 | 0.998   | E  | 1     | E  | 1     | E  |
| M5005_Spy_1385c | glyQ   | 1358639 | 1359556 | 305 | 0.9735  | U  | 1     | E  | 1     | E  |
| M5005_Spy_1386c | -      | 1359928 | 1360461 | 177 | 0       | NE | 0     | NE | 0     | NE |
| M5005_Spy_1387c | -      | 1360593 | 1361432 | 279 | 0       | NE | 0     | NE | 0     | NE |
| M5005_Spy_1388c | nagA   | 1361554 | 1362702 | 382 | 0       | NE | 0     | NE | 0     | NE |
| M5005_Spy_1389c | -      | 1362820 | 1364469 | 549 | 0       | NE | 0     | NE | 0     | NE |
| M5005_Spy_1390  | -      | 1364653 | 1365375 | 240 | 0       | NE | 0     | NE | 0     | NE |
| M5005_Spy_1391c | -      | 1365504 | 1366346 | 280 | 0       | NE | 0     | NE | 0     | NE |
| M5005_Spy_1392  | -      | 1366639 | 1367196 | 185 | 0.00025 | NE | 0     | NE | 0     | NE |
| M5005_Spy_1393c | -      | 1367232 | 1368056 | 274 | 0       | NE | 0     | NE | 0     | NE |
| M5005_Spy_1394c | -      | 1368058 | 1368675 | 205 | 0       | NE | 0     | NE | 0     | NE |
| M5005_Spy_1395c | lacD.1 | 1368872 | 1369849 | 325 | 0       | NE | 0     | NE | 0     | NE |
| M5005_Spy_1396c | lacC1  | 1369999 | 1370349 | 116 | 0       | NE | 0     | NE | 0     | NE |
| M5005_Spy_1397c | lacB.1 | 1370359 | 1370874 | 171 | 0       | NE | 0     | NE | 0     | NE |
| M5005_Spy_1398c | lacA.1 | 1370889 | 1371314 | 141 | 0       | NE | 0     | NE | 0     | NE |
| M5005_Spy_1399c | -      | 1371554 | 1373002 | 482 | 0       | NE | 0     | NE | 0     | NE |
| M5005_Spy_1400c | -      | 1373031 | 1373336 | 101 | 0       | NE | 0     | NE | 0     | NE |



|                 |        |         |         |      |         |    |         |    |       |    |
|-----------------|--------|---------|---------|------|---------|----|---------|----|-------|----|
| M5005_Spy_1401c | -      | 1373329 | 1373802 | 157  | 0       | NE | 0       | NE | 0     | NE |
| M5005_Spy_1402  | lacR.1 | 1374039 | 1374809 | 256  | 0       | NE | 0       | NE | 0     | NE |
| M5005_Spy_1403c | -      | 1374836 | 1375006 | 56   | 0.00025 | NE | 0.0005  | NE | 0     | NE |
| M5005_Spy_1404c | copZ   | 1375013 | 1375216 | 67   | 0       | NE | 0       | NE | 0     | NE |
| M5005_Spy_1405c | copA   | 1375230 | 1377461 | 743  | 0       | NE | 0       | NE | 0     | NE |
| M5005_Spy_1406c | copY   | 1377461 | 1377895 | 144  | 0       | NE | 0       | NE | 0     | NE |
| M5005_Spy_1407  | -      | 1378067 | 1379053 | 328  | 0       | NE | 0       | NE | 0     | NE |
| M5005_Spy_1408c | rbfA   | 1379187 | 1379543 | 118  | 0.00025 | NE | 0       | NE | 0.992 | E  |
| M5005_Spy_1409c | infB   | 1379742 | 1382603 | 953  | 1       | E  | 1       | E  | 1     | E  |
| M5005_Spy_1410c | -      | 1382623 | 1382925 | 100  | 0.00025 | NE | 0.0005  | NE | 0.999 | E  |
| M5005_Spy_1411c | -      | 1382918 | 1383214 | 98   | 0.00225 | NE | 0.00125 | NE | 1     | E  |
| M5005_Spy_1412c | nusA   | 1383230 | 1384387 | 385  | 1       | E  | 1       | E  | 1     | E  |
| M5005_Spy_1413c | -      | 1384562 | 1385098 | 178  | 0       | NE | 0       | NE | 0.001 | NE |
| M5005_Spy_1414c | -      | 1385343 | 1385522 | 59   | -1      | S  | -1      | S  | -1    | S  |
| M5005_Spy_1415c | sdaD2  | 1385761 | 1386933 | 390  | 0       | NE | 0       | NE | 0     | NE |
| M5005_Spy_1416c | -      | 1387049 | 1388245 | 398  | 0       | NE | 0       | NE | 0     | NE |
| M5005_Spy_1417c | -      | 1388356 | 1388541 | 61   | 0       | NE | 0       | NE | 0     | NE |
| M5005_Spy_1418c | -      | 1388538 | 1388837 | 99   | 0       | NE | 0       | NE | 0     | NE |
| M5005_Spy_1419c | -      | 1388848 | 1389468 | 206  | 0       | NE | 0       | NE | 0     | NE |
| M5005_Spy_1420c | -      | 1389471 | 1389632 | 53   | -1      | S  | -1      | S  | -1    | S  |
| M5005_Spy_1421c | -      | 1389641 | 1391548 | 635  | 0       | NE | 0       | NE | 0.001 | NE |
| M5005_Spy_1422c | -      | 1391559 | 1392194 | 211  | 0       | NE | 0       | NE | 0     | NE |
| M5005_Spy_1423c | -      | 1392194 | 1393249 | 351  | 0       | NE | 0       | NE | 0     | NE |
| M5005_Spy_1424c | -      | 1393246 | 1395228 | 660  | 0       | NE | 0       | NE | 0     | NE |
| M5005_Spy_1425c | -      | 1395238 | 1396080 | 280  | 0       | NE | 0       | NE | 0     | NE |
| M5005_Spy_1426c | -      | 1396092 | 1400474 | 1460 | 0       | NE | 0       | NE | 0     | NE |
| M5005_Spy_1427c | -      | 1400489 | 1400722 | 77   | 0       | NE | 0       | NE | 0     | NE |
| M5005_Spy_1428c | -      | 1400797 | 1401252 | 151  | 0       | NE | 0       | NE | 0     | NE |
| M5005_Spy_1429c | -      | 1401306 | 1401905 | 199  | 0       | NE | 0       | NE | 0     | NE |
| M5005_Spy_1430c | -      | 1401917 | 1402276 | 119  | 0.00025 | NE | 0       | NE | 0     | NE |
| M5005_Spy_1431c | -      | 1402280 | 1402606 | 108  | 0       | NE | 0       | NE | 0     | NE |
| M5005_Spy_1432c | -      | 1402621 | 1402899 | 92   | 0       | NE | 0       | NE | 0     | NE |
| M5005_Spy_1433c | -      | 1402910 | 1403266 | 118  | 0.00025 | NE | 0       | NE | 0     | NE |
| M5005_Spy_1434c | -      | 1403278 | 1404165 | 295  | 0       | NE | 0       | NE | 0     | NE |
| M5005_Spy_1435c | -      | 1404178 | 1404747 | 189  | 0       | NE | 0       | NE | 0     | NE |
| M5005_Spy_1436c | -      | 1404903 | 1405169 | 88   | 0       | NE | 0       | NE | 0     | NE |
| M5005_Spy_1437c | -      | 1405172 | 1405360 | 62   | 0       | NE | 0       | NE | 0     | NE |
| M5005_Spy_1438c | -      | 1405391 | 1406830 | 479  | 0       | NE | 0       | NE | 0     | NE |
| M5005_Spy_1439c | -      | 1406796 | 1408328 | 510  | 0       | NE | 0       | NE | 0     | NE |
| M5005_Spy_1440c | -      | 1408344 | 1409621 | 425  | 0       | NE | 0       | NE | 0     | NE |
| M5005_Spy_1441c | -      | 1409611 | 1410105 | 164  | 0       | NE | 0       | NE | 0     | NE |
| M5005_Spy_1442c | -      | 1410153 | 1410569 | 138  | 0       | NE | 0       | NE | 0     | NE |
| M5005_Spy_1443c | -      | 1410566 | 1410757 | 63   | 0       | NE | 0       | NE | 0     | NE |
| M5005_Spy_1444c | -      | 1410747 | 1411598 | 283  | 0.00025 | NE | 0       | NE | 0     | NE |
| M5005_Spy_1445c | -      | 1411607 | 1411873 | 88   | 0       | NE | 0       | NE | 0     | NE |
| M5005_Spy_1446c | -      | 1411870 | 1412037 | 55   | -1      | S  | -1      | S  | -1    | S  |
| M5005_Spy_1447c | -      | 1412038 | 1413360 | 440  | 0       | NE | 0       | NE | 0     | NE |
| M5005_Spy_1448c | -      | 1413357 | 1413632 | 91   | 0       | NE | 0       | NE | 0     | NE |
| M5005_Spy_1449c | -      | 1414019 | 1416403 | 794  | 0       | NE | 0       | NE | 0     | NE |
| M5005_Spy_1450c | -      | 1416408 | 1418330 | 640  | 0       | NE | 0       | NE | 0     | NE |
| M5005_Spy_1451c | -      | 1418373 | 1418930 | 185  | 0       | NE | 0       | NE | 0     | NE |
| M5005_Spy_1452c | -      | 1418941 | 1419339 | 132  | 0.00025 | NE | 0       | NE | 0     | NE |
| M5005_Spy_1453c | -      | 1419343 | 1420497 | 384  | 0       | NE | 0       | NE | 0     | NE |
| M5005_Spy_1454c | -      | 1420497 | 1420796 | 99   | 0.0285  | NE | 0       | NE | 0     | NE |
| M5005_Spy_1455c | -      | 1420884 | 1421087 | 67   | 0.05025 | U  | 0       | NE | 0     | NE |
| M5005_Spy_1456c | -      | 1421084 | 1421236 | 50   | -1      | S  | -1      | S  | -1    | S  |
| M5005_Spy_1457c | -      | 1421233 | 1421619 | 128  | 0.00025 | NE | 0       | NE | 0.001 | NE |
| M5005_Spy_1458c | -      | 1421616 | 1421819 | 67   | 0       | NE | 0       | NE | 0.127 | U  |
| M5005_Spy_1459c | -      | 1421812 | 1421982 | 56   | -1      | S  | -1      | S  | -1    | S  |
| M5005_Spy_1460c | -      | 1421979 | 1422254 | 91   | 0.424   | U  | 0       | NE | 0.001 | NE |
| M5005_Spy_1461c | -      | 1422316 | 1422531 | 71   | 0.001   | NE | 0.0005  | NE | 0     | NE |
| M5005_Spy_1462  | -      | 1422579 | 1422992 | 137  | 0.00025 | NE | 0       | NE | 0     | NE |
| M5005_Spy_1463c | -      | 1422973 | 1423128 | 51   | -1      | S  | -1      | S  | -1    | S  |

|                 |       |         |         |     |         |    |         |    |       |    |
|-----------------|-------|---------|---------|-----|---------|----|---------|----|-------|----|
| M5005_Spy_1464  | -     | 1423403 | 1423804 | 133 | 0.99925 | E  | 0.99975 | E  | 1     | E  |
| M5005_Spy_1465  | -     | 1423818 | 1424201 | 127 | 0       | NE | 0       | NE | 0     | NE |
| M5005_Spy_1466  | -     | 1424212 | 1424763 | 183 | 0.00025 | NE | 0       | NE | 0     | NE |
| M5005_Spy_1467  | int.3 | 1424880 | 1425959 | 359 | 0       | NE | 0       | NE | 0     | NE |
| M5005_Spy_1468c | trmB  | 1426157 | 1426792 | 211 | 0       | NE | 0       | NE | 0     | NE |
| M5005_Spy_1469c | -     | 1426792 | 1427583 | 263 | 0.9995  | E  | 1       | E  | 1     | E  |
| M5005_Spy_1470c | -     | 1427647 | 1428681 | 344 | 0       | NE | 0       | NE | 0     | NE |
| M5005_Spy_1471c | -     | 1428684 | 1429409 | 241 | 0       | NE | 0       | NE | 0     | NE |
| M5005_Spy_1472  | hit   | 1429481 | 1429900 | 139 | 0       | NE | 0       | NE | 0     | NE |
| M5005_Spy_1473  | -     | 1429897 | 1430253 | 118 | 0       | NE | 0       | NE | 0     | NE |
| M5005_Spy_1474c | lytR  | 1430364 | 1431638 | 424 | 0       | NE | 0       | NE | 0     | NE |
| M5005_Spy_1475c | -     | 1431647 | 1432171 | 174 | 0       | NE | 0       | NE | 0     | NE |
| M5005_Spy_1476c | -     | 1432146 | 1432607 | 153 | 0.00025 | NE | 0       | NE | 0.924 | U  |
| M5005_Spy_1477c | -     | 1432761 | 1434221 | 486 | 0       | NE | 0       | NE | 0     | NE |
| M5005_Spy_1478  | -     | 1434485 | 1435297 | 270 | 0       | NE | 0       | NE | 0     | NE |
| M5005_Spy_1479  | manL  | 1435649 | 1436641 | 330 | 0.00025 | NE | 0       | NE | 0     | NE |
| M5005_Spy_1480  | manM  | 1436730 | 1437539 | 269 | 0.00025 | NE | 0       | NE | 0     | NE |
| M5005_Spy_1481  | manN  | 1437556 | 1438467 | 303 | 0       | NE | 0       | NE | 0     | NE |
| M5005_Spy_1482  | manO  | 1438581 | 1438940 | 119 | 0       | NE | 0       | NE | 0     | NE |
| M5005_Spy_1483  | serS  | 1439332 | 1440609 | 425 | 0.9995  | E  | 1       | E  | 1     | E  |
| M5005_Spy_1484c | accD  | 1440831 | 1441601 | 256 | 0.032   | NE | 1       | E  | 1     | E  |
| M5005_Spy_1485c | accA  | 1441598 | 1442464 | 288 | 0.99925 | E  | 1       | E  | 1     | E  |
| M5005_Spy_1486c | accC  | 1442473 | 1443837 | 454 | 0.9925  | U  | 1       | E  | 1     | E  |
| M5005_Spy_1487c | fabZ  | 1443869 | 1444291 | 140 | 0       | NE | 0.00075 | NE | 1     | E  |
| M5005_Spy_1488c | accB  | 1444288 | 1444788 | 166 | 0.9815  | U  | 1       | E  | 1     | E  |
| M5005_Spy_1489c | fabF  | 1444790 | 1446022 | 410 | 1       | E  | 1       | E  | 1     | E  |
| M5005_Spy_1490c | fabG  | 1446037 | 1446771 | 244 | 0.00025 | NE | 1       | E  | 0.994 | E  |
| M5005_Spy_1491c | fabD  | 1446761 | 1447699 | 312 | 0.00025 | NE | 1       | E  | 1     | E  |
| M5005_Spy_1492c | fabK  | 1447724 | 1448695 | 323 | 0.00325 | NE | 0.15275 | U  | 0.999 | E  |
| M5005_Spy_1493c | acpP  | 1448897 | 1449121 | 74  | 0.00025 | NE | 1       | E  | 0.997 | E  |
| M5005_Spy_1494c | fabH  | 1449182 | 1450156 | 324 | 1       | E  | 1       | E  | 1     | E  |
| M5005_Spy_1495c | -     | 1450157 | 1450591 | 144 | 0       | NE | 0       | NE | 0.857 | U  |
| M5005_Spy_1496c | phaB  | 1450668 | 1451459 | 263 | 1       | E  | 1       | E  | 1     | E  |
| M5005_Spy_1497c | dnaJ  | 1451679 | 1452836 | 385 | 1       | E  | 1       | E  | 1     | E  |
| M5005_Spy_1498c | dnaK  | 1453117 | 1454943 | 608 | 1       | E  | 1       | E  | 1     | E  |
| M5005_Spy_1499c | grpE  | 1455124 | 1455657 | 177 | 0.99525 | E  | 1       | E  | 1     | E  |
| M5005_Spy_1500c | hrcA  | 1455699 | 1456733 | 344 | 0.00025 | NE | 0.00025 | NE | 1     | E  |
| M5005_Spy_1501c | -     | 1456868 | 1457437 | 189 | 0.00025 | NE | 0       | NE | 0.001 | NE |
| M5005_Spy_1502c | -     | 1457434 | 1458177 | 247 | 0       | NE | 0       | NE | 0     | NE |
| M5005_Spy_1503c | -     | 1458167 | 1458874 | 235 | 0       | NE | 0       | NE | 0     | NE |
| M5005_Spy_1504c | -     | 1459265 | 1459513 | 82  | 0       | NE | 0       | NE | 0     | NE |
| M5005_Spy_1505c | -     | 1459723 | 1459938 | 71  | 0       | NE | 0       | NE | 0     | NE |
| M5005_Spy_1506c | gatB  | 1459935 | 1461374 | 479 | 1       | E  | 1       | E  | 1     | E  |
| M5005_Spy_1507c | gatA  | 1461374 | 1462840 | 488 | 1       | E  | 1       | E  | 1     | E  |
| M5005_Spy_1508c | gatC  | 1462840 | 1463142 | 100 | 0.97625 | U  | 1       | E  | 0.997 | E  |
| M5005_Spy_1509c | -     | 1463374 | 1463583 | 69  | 0       | NE | 0       | NE | 0     | NE |
| M5005_Spy_1510c | -     | 1463555 | 1463671 | 38  | -1      | S  | -1      | S  | -1    | S  |
| M5005_Spy_1511c | -     | 1464245 | 1464691 | 148 | 0       | NE | 0       | NE | 0     | NE |
| M5005_Spy_1512c | codY  | 1464838 | 1465620 | 260 | 0.00575 | NE | 0.0005  | NE | 1     | E  |
| M5005_Spy_1513c | -     | 1465838 | 1467052 | 404 | 0       | NE | 0       | NE | 0     | NE |
| M5005_Spy_1514  | -     | 1467283 | 1467735 | 150 | 0.00025 | NE | 0       | NE | 0.001 | NE |
| M5005_Spy_1515c | -     | 1467858 | 1469135 | 425 | 0.00025 | NE | 0       | NE | 0     | NE |
| M5005_Spy_1516  | asnB  | 1469318 | 1470283 | 321 | 0       | NE | 0       | NE | 0     | NE |
| M5005_Spy_1517c | -     | 1470632 | 1471336 | 234 | 0       | NE | 0       | NE | 0     | NE |
| M5005_Spy_1518c | -     | 1471349 | 1472251 | 300 | 0.00025 | NE | 0       | NE | 0     | NE |
| M5005_Spy_1519c | recG  | 1472544 | 1474559 | 671 | 0       | NE | 0       | NE | 0     | NE |
| M5005_Spy_1520  | -     | 1474652 | 1474852 | 66  | 0.00275 | NE | 0       | NE | 0     | NE |
| M5005_Spy_1521c | -     | 1474934 | 1476388 | 484 | 0       | NE | 0       | NE | 0     | NE |
| M5005_Spy_1522c | -     | 1476325 | 1477005 | 226 | 0       | NE | 0       | NE | 0     | NE |
| M5005_Spy_1523c | -     | 1477002 | 1477595 | 197 | 0       | NE | 0       | NE | 0     | NE |
| M5005_Spy_1524c | cycC  | 1477592 | 1479262 | 556 | 0       | NE | 0       | NE | 0     | NE |
| M5005_Spy_1525c | cycD  | 1479255 | 1481018 | 587 | 0       | NE | 0       | NE | 0     | NE |
| M5005_Spy_1526c | fhuC  | 1481015 | 1481851 | 278 | 0       | NE | 0       | NE | 0     | NE |

|                 |        |         |         |      |         |    |         |    |       |    |
|-----------------|--------|---------|---------|------|---------|----|---------|----|-------|----|
| M5005_Spy_1527c | fhuB2  | 1481848 | 1482870 | 340  | 0       | NE | 0       | NE | 0     | NE |
| M5005_Spy_1528c | fhuD2  | 1482872 | 1483756 | 294  | 0       | NE | 0       | NE | 0     | NE |
| M5005_Spy_1529c | shp    | 1483740 | 1484615 | 291  | 0       | NE | 0       | NE | 0     | NE |
| M5005_Spy_1530c | -      | 1484812 | 1488639 | 1275 | 0       | NE | 0       | NE | 0     | NE |
| M5005_Spy_1531c | isp2   | 1489128 | 1490639 | 503  | 0       | NE | 0       | NE | 0     | NE |
| M5005_Spy_1532c | alr    | 1490726 | 1491826 | 366  | 0.99575 | E  | 0.9555  | U  | 1     | E  |
| M5005_Spy_1533c | acpS   | 1491823 | 1492179 | 118  | 0.999   | E  | 0.05675 | NE | 1     | E  |
| M5005_Spy_1534c | secA   | 1492295 | 1494814 | 839  | 1       | E  | 1       | E  | 1     | E  |
| M5005_Spy_1535c | -      | 1494892 | 1494996 | 34   | -1      | S  | -1      | S  | -1    | S  |
| M5005_Spy_1536c | -      | 1494980 | 1495495 | 171  | 0       | NE | 0       | NE | 0     | NE |
| M5005_Spy_1537c | -      | 1495398 | 1496102 | 234  | 0       | NE | 0       | NE | 0     | NE |
| M5005_Spy_1538c | pmi    | 1496264 | 1497217 | 317  | 0       | NE | 0       | NE | 0     | NE |
| M5005_Spy_1539c | scrK   | 1497312 | 1498268 | 318  | 0       | NE | 0       | NE | 0     | NE |
| M5005_Spy_1540c | endoS  | 1498460 | 1501447 | 995  | 0       | NE | 0       | NE | 0     | NE |
| M5005_Spy_1541c | -      | 1501471 | 1501635 | 54   | -1      | S  | -1      | S  | -1    | S  |
| M5005_Spy_1542c | scrA   | 1501678 | 1503561 | 627  | 0.00025 | NE | 0       | NE | 0     | NE |
| M5005_Spy_1543  | scrB   | 1503803 | 1505242 | 479  | 0.00025 | NE | 0.00025 | NE | 0.001 | NE |
| M5005_Spy_1544  | scrR   | 1505247 | 1506212 | 321  | 0       | NE | 0       | NE | 0     | NE |
| M5005_Spy_1545c | nusB   | 1506353 | 1506805 | 150  | 0.00025 | NE | 0       | NE | 1     | E  |
| M5005_Spy_1546c | -      | 1506798 | 1507187 | 129  | 0       | NE | 0       | NE | 0.896 | U  |
| M5005_Spy_1547c | efp    | 1507233 | 1507790 | 185  | 0       | NE | 0       | NE | 0     | NE |
| M5005_Spy_1548c | comEB  | 1507886 | 1508347 | 153  | 0       | NE | 0       | NE | 0     | NE |
| M5005_Spy_1549c | pepP   | 1508382 | 1509455 | 357  | 0       | NE | 0       | NE | 0     | NE |
| M5005_Spy_1550c | uvrA   | 1509570 | 1512428 | 952  | 0.00025 | NE | 0       | NE | 0     | NE |
| M5005_Spy_1551  | corA   | 1512601 | 1513545 | 314  | 0.00075 | NE | 1       | E  | 1     | E  |
| M5005_Spy_1552  | -      | 1513678 | 1514334 | 218  | 0       | NE | 0       | NE | 0     | NE |
| M5005_Spy_1553c | rpsR   | 1514467 | 1514706 | 79   | 0.91925 | U  | 0.997   | E  | 0.99  | U  |
| M5005_Spy_1554c | ssb3   | 1514871 | 1515362 | 163  | 0.00025 | NE | 0       | NE | 0.295 | U  |
| M5005_Spy_1555c | rpsF   | 1515384 | 1515674 | 96   | 0.987   | U  | 0       | NE | 0.172 | U  |
| M5005_Spy_1556c | -      | 1515847 | 1516140 | 97   | 0       | NE | 0       | NE | 0     | NE |
| M5005_Spy_1557  | mutY   | 1516461 | 1517462 | 333  | 0       | NE | 0       | NE | 0     | NE |
| M5005_Spy_1558  | -      | 1517538 | 1518125 | 195  | 0       | NE | 0       | NE | 0     | NE |
| M5005_Spy_1559c | trx    | 1518177 | 1518491 | 104  | 0.00025 | NE | 0       | NE | 0.018 | NE |
| M5005_Spy_1560c | -      | 1518572 | 1519075 | 167  | 0       | NE | 0       | NE | 0     | NE |
| M5005_Spy_1561c | mutS2  | 1519076 | 1521415 | 779  | 0.0015  | NE | 0       | NE | 0     | NE |
| M5005_Spy_1562c | -      | 1521564 | 1522109 | 181  | 0.00025 | NE | 0       | NE | 0     | NE |
| M5005_Spy_1563c | -      | 1522112 | 1522420 | 102  | 0       | NE | 0       | NE | 0     | NE |
| M5005_Spy_1564  | -      | 1522577 | 1523479 | 300  | 0.1885  | U  | 0.00025 | NE | 1     | E  |
| M5005_Spy_1565  | spi    | 1523490 | 1524083 | 197  | 0.75    | U  | 1       | E  | 1     | E  |
| M5005_Spy_1566  | recD   | 1524141 | 1526594 | 817  | 0       | NE | 0       | NE | 0     | NE |
| M5005_Spy_1567  | -      | 1526685 | 1527167 | 160  | 0.00025 | NE | 0       | NE | 0.001 | NE |
| M5005_Spy_1568c | dinP   | 1527260 | 1528354 | 364  | 0       | NE | 0       | NE | 0     | NE |
| M5005_Spy_1569  | pfl    | 1528563 | 1530890 | 775  | 0       | NE | 0       | NE | 0     | NE |
| M5005_Spy_1570c | -      | 1531068 | 1532018 | 316  | 0       | NE | 0       | NE | 0     | NE |
| M5005_Spy_1571c | cppA   | 1532003 | 1532755 | 250  | 0       | NE | 0       | NE | 0     | NE |
| M5005_Spy_1572  | -      | 1533053 | 1533949 | 298  | 0       | NE | 0       | NE | 0.001 | NE |
| M5005_Spy_1573c | glpF.2 | 1534285 | 1535133 | 282  | 0.00025 | NE | 0.00025 | NE | 1     | E  |
| M5005_Spy_1574c | -      | 1535303 | 1535449 | 48   | -1      | S  | -1      | S  | -1    | S  |
| M5005_Spy_1575c | norA   | 1535635 | 1536831 | 398  | 0.00025 | NE | 0       | NE | 0     | NE |
| M5005_Spy_1576  | srv    | 1536937 | 1537656 | 239  | 0       | NE | 0       | NE | 0     | NE |
| M5005_Spy_1577  | pepXP  | 1537678 | 1539960 | 760  | 0       | NE | 0       | NE | 0     | NE |
| M5005_Spy_1578c | -      | 1540040 | 1540261 | 73   | 0       | NE | 0       | NE | 0     | NE |
| M5005_Spy_1579  | -      | 1540431 | 1540805 | 124  | 0.00025 | NE | 0       | NE | 0     | NE |
| M5005_Spy_1580  | -      | 1540998 | 1541297 | 99   | 0       | NE | 0       | NE | 0     | NE |
| M5005_Spy_1581c | -      | 1541354 | 1542091 | 245  | 0       | NE | 0       | NE | 0     | NE |
| M5005_Spy_1582c | dnaQ   | 1542240 | 1542827 | 195  | 0       | NE | 0       | NE | 0     | NE |
| M5005_Spy_1583c | -      | 1542876 | 1543406 | 176  | 0       | NE | 0       | NE | 0.001 | NE |
| M5005_Spy_1584  | -      | 1543612 | 1544781 | 389  | 0       | NE | 0       | NE | 0     | NE |
| M5005_Spy_1585c | deoC   | 1544876 | 1545547 | 223  | 0.00025 | NE | 0       | NE | 0     | NE |
| M5005_Spy_1586c | nupC   | 1545577 | 1546779 | 400  | 0       | NE | 0       | NE | 0     | NE |
| M5005_Spy_1587c | udp    | 1546800 | 1547579 | 259  | 0.00025 | NE | 0       | NE | 0     | NE |
| M5005_Spy_1588c | -      | 1547644 | 1547745 | 33   | -1      | S  | -1      | S  | -1    | S  |
| M5005_Spy_1589  | crgR   | 1547819 | 1548562 | 247  | 0       | NE | 0       | NE | 0     | NE |

|                 |           |         |         |     |         |    |        |    |       |    |
|-----------------|-----------|---------|---------|-----|---------|----|--------|----|-------|----|
| M5005_Spy_1590  | rpsN      | 1548798 | 1549067 | 89  | 0       | NE | 0      | NE | 0     | NE |
| M5005_Spy_1591c | gcp       | 1549238 | 1550266 | 342 | 0.00025 | NE | 1      | E  | 0.998 | E  |
| M5005_Spy_1592c | -         | 1550256 | 1550711 | 151 | 0       | NE | 0      | NE | 0     | NE |
| M5005_Spy_1593c | -         | 1550683 | 1551381 | 232 | 0.00025 | NE | 0.6645 | U  | 1     | E  |
| M5005_Spy_1594  | -         | 1551666 | 1551896 | 76  | 0.00025 | NE | 1      | E  | 1     | E  |
| M5005_Spy_1595  | -         | 1551898 | 1553580 | 560 | 0.99875 | E  | 1      | E  | 1     | E  |
| M5005_Spy_1596c | glnA      | 1553807 | 1555153 | 448 | 0       | NE | 0      | NE | 0.001 | NE |
| M5005_Spy_1597c | glnR      | 1555191 | 1555562 | 123 | 0       | NE | 0      | NE | 0     | NE |
| M5005_Spy_1598c | -         | 1555629 | 1556180 | 183 | 0.00025 | NE | 0      | NE | 0.001 | NE |
| M5005_Spy_1599c | pgk       | 1556443 | 1557639 | 398 | 0.999   | E  | 1      | E  | 1     | E  |
| M5005_Spy_1600c | lppC      | 1557832 | 1558686 | 284 | 0       | NE | 0      | NE | 0     | NE |
| M5005_Spy_1601c | -         | 1558916 | 1559806 | 296 | 0       | NE | 0      | NE | 0     | NE |
| M5005_Spy_1602c | -         | 1560043 | 1561707 | 554 | 1       | E  | 1      | E  | 1     | E  |
| M5005_Spy_1603c | asp       | 1561707 | 1562072 | 121 | 0       | NE | 0      | NE | 0.001 | NE |
| M5005_Spy_1604c | -         | 1562097 | 1562234 | 45  | -1      | S  | -1     | S  | -1    | S  |
| M5005_Spy_1605c | -         | 1562239 | 1563372 | 377 | 0       | NE | 0      | NE | 0     | NE |
| M5005_Spy_1606c | rpmB      | 1563550 | 1563738 | 62  | 0.00175 | NE | 0      | NE | 0     | NE |
| M5005_Spy_1607c | fbp       | 1564120 | 1565001 | 293 | 1       | E  | 1      | E  | 1     | E  |
| M5005_Spy_1608c | -         | 1565347 | 1566273 | 308 | 0       | NE | 0      | NE | 0     | NE |
| M5005_Spy_1610c | pyrG      | 1567892 | 1568044 | 50  | 0       | NE | 0      | NE | 0     | NE |
| M5005_Spy_1611c | rpoE      | 1568301 | 1568876 | 191 | 0       | NE | 0      | NE | 0     | NE |
| M5005_Spy_1612c | tig/ropA  | 1569093 | 1570376 | 427 | 0.00025 | NE | 0      | NE | 0     | NE |
| M5005_Spy_1613  | -         | 1570697 | 1571542 | 281 | 0       | NE | 0      | NE | 0.001 | NE |
| M5005_Spy_1614c | -         | 1571607 | 1572167 | 186 | 0       | NE | 0      | NE | 0     | NE |
| M5005_Spy_1615c | -         | 1572181 | 1572651 | 156 | 0       | NE | 0      | NE | 0     | NE |
| M5005_Spy_1616c | thiD      | 1572641 | 1573405 | 254 | 0       | NE | 0      | NE | 0     | NE |
| M5005_Spy_1617c | truA      | 1573395 | 1574144 | 249 | 0       | NE | 0      | NE | 0     | NE |
| M5005_Spy_1618c | comX.2    | 1574329 | 1574880 | 183 | 0       | NE | 0      | NE | 0     | NE |
| M5005_Spy_1619  | -         | 1580302 | 1580436 | 44  | -1      | S  | -1     | S  | -1    | S  |
| M5005_Spy_1620c | -         | 1580598 | 1581740 | 380 | 0.00025 | NE | 0      | NE | 0     | NE |
| M5005_Spy_1621  | hsdR      | 1582022 | 1585000 | 992 | 0       | NE | 0      | NE | 0     | NE |
| M5005_Spy_1622  | hsdS      | 1585013 | 1586212 | 399 | 0       | NE | 0      | NE | 0     | NE |
| M5005_Spy_1623  | hsdM      | 1586225 | 1587805 | 526 | 0.00025 | NE | 0      | NE | 0     | NE |
| M5005_Spy_1624c | -         | 1588015 | 1588206 | 63  | 0       | NE | 0      | NE | 0     | NE |
| M5005_Spy_1625c | salR      | 1588358 | 1588963 | 201 | 0       | NE | 0      | NE | 0     | NE |
| M5005_Spy_1626c | salK      | 1588944 | 1590506 | 520 | 0       | NE | 0      | NE | 0     | NE |
| M5005_Spy_1627c | salY      | 1590546 | 1592453 | 635 | 0       | NE | 0      | NE | 0     | NE |
| M5005_Spy_1628c | salX      | 1592455 | 1593192 | 245 | 0       | NE | 0      | NE | 0     | NE |
| M5005_Spy_1629c | salX/salT | 1593189 | 1593650 | 153 | 0       | NE | 0      | NE | 0     | NE |
| M5005_Spy_1630c | salB      | 1593724 | 1595349 | 541 | 0       | NE | 0      | NE | 0     | NE |
| M5005_Spy_1631c | salA      | 1595432 | 1595578 | 48  | -1      | S  | -1     | S  | -1    | S  |
| M5005_Spy_1632c | lacG      | 1596090 | 1597496 | 468 | 0       | NE | 0      | NE | 0     | NE |
| M5005_Spy_1633c | lacE      | 1597584 | 1599281 | 565 | 0.00075 | NE | 0.017  | NE | 0     | NE |
| M5005_Spy_1634c | lacF      | 1599281 | 1599598 | 105 | 0       | NE | 0      | NE | 0     | NE |
| M5005_Spy_1635c | lacD.2    | 1599622 | 1600605 | 327 | 0       | NE | 0      | NE | 0     | NE |
| M5005_Spy_1636c | lacC.2    | 1600609 | 1601538 | 309 | 0       | NE | 0      | NE | 0     | NE |
| M5005_Spy_1637c | lacB.2    | 1601586 | 1602101 | 171 | 0       | NE | 0      | NE | 0     | NE |
| M5005_Spy_1638c | lacA.2    | 1602136 | 1602564 | 142 | 0       | NE | 0      | NE | 0     | NE |
| M5005_Spy_1639  | lacR.2    | 1603011 | 1603784 | 257 | 0       | NE | 0      | NE | 0     | NE |
| M5005_Spy_1640  | -         | 1604445 | 1604732 | 95  | 0       | NE | 0      | NE | 0     | NE |
| M5005_Spy_1641  | -         | 1604722 | 1605057 | 111 | 0       | NE | 0      | NE | 0     | NE |
| M5005_Spy_1642  | -         | 1605209 | 1605391 | 60  | 0       | NE | 0      | NE | 0.003 | NE |
| M5005_Spy_1643  | -         | 1605380 | 1605565 | 61  | -1      | S  | -1     | S  | -1    | S  |
| M5005_Spy_1644c | -         | 1605479 | 1605679 | 66  | -1      | S  | -1     | S  | -1    | S  |
| M5005_Spy_1645  | -         | 1606013 | 1606162 | 49  | -1      | S  | -1     | S  | -1    | S  |
| M5005_Spy_1646c | rpsI      | 1606282 | 1606674 | 130 | 0.0005  | NE | 0.0005 | NE | 0.445 | U  |
| M5005_Spy_1647c | rpIM      | 1606695 | 1607141 | 148 | 0.00025 | NE | 0.9995 | E  | 0.001 | NE |
| M5005_Spy_1648c | -         | 1607359 | 1607565 | 68  | 0.0215  | NE | 0      | NE | 0.074 | U  |
| M5005_Spy_1649c | -         | 1607562 | 1608068 | 168 | 0       | NE | 0      | NE | 0     | NE |
| M5005_Spy_1650c | -         | 1608204 | 1609064 | 286 | 0       | NE | 0      | NE | 0.001 | NE |
| M5005_Spy_1651c | -         | 1609161 | 1609679 | 172 | 0       | NE | 0      | NE | 0     | NE |
| M5005_Spy_1652c | -         | 1609683 | 1610429 | 248 | 0       | NE | 0      | NE | 0     | NE |
| M5005_Spy_1653c | -         | 1610476 | 1611273 | 265 | 0       | NE | 0      | NE | 0     | NE |

|                 |         |         |         |      |         |    |        |    |       |    |
|-----------------|---------|---------|---------|------|---------|----|--------|----|-------|----|
| M5005_Spy_1654c | -       | 1611469 | 1611882 | 137  | 0       | NE | 0      | NE | 0     | NE |
| M5005_Spy_1655c | cysS    | 1611875 | 1613218 | 447  | 1       | E  | 1      | E  | 0.992 | E  |
| M5005_Spy_1656c | -       | 1613246 | 1613476 | 76   | 0       | NE | 0      | NE | 0     | NE |
| M5005_Spy_1657c | -       | 1613489 | 1613761 | 90   | 0       | NE | 0      | NE | 0     | NE |
| M5005_Spy_1658c | cysE    | 1613955 | 1614536 | 193  | 0.958   | U  | 0.9995 | E  | 0.791 | U  |
| M5005_Spy_1659c | -       | 1614545 | 1615297 | 250  | 0.00025 | NE | 0      | NE | 0.001 | NE |
| M5005_Spy_1660c | pnp     | 1615290 | 1617422 | 710  | 0       | NE | 0      | NE | 0     | NE |
| M5005_Spy_1661c | -       | 1617703 | 1618431 | 242  | 0       | NE | 0      | NE | 0     | NE |
| M5005_Spy_1662c | ulaA    | 1618587 | 1619822 | 411  | 0       | NE | 0      | NE | 0     | NE |
| M5005_Spy_1663c | -       | 1619849 | 1620133 | 94   | 0.00025 | NE | 0      | NE | 0     | NE |
| M5005_Spy_1664c | -       | 1620126 | 1622186 | 686  | 0       | NE | 0      | NE | 0     | NE |
| M5005_Spy_1665c | -       | 1622411 | 1622554 | 47   | -1      | S  | -1     | S  | -1    | S  |
| M5005_Spy_1666c | rpsO    | 1622538 | 1622807 | 89   | 0.65075 | U  | 0      | NE | 0.755 | U  |
| M5005_Spy_1667c | -       | 1622965 | 1623120 | 51   | -1      | S  | -1     | S  | -1    | S  |
| M5005_Spy_1668  | -       | 1623246 | 1623515 | 89   | 0       | NE | 0      | NE | 0     | NE |
| M5005_Spy_1669  | def     | 1623616 | 1624230 | 204  | 0.93575 | U  | 1      | E  | 1     | E  |
| M5005_Spy_1670c | -       | 1624264 | 1624806 | 180  | 0       | NE | 0      | NE | 0     | NE |
| M5005_Spy_1671c | -       | 1624937 | 1625365 | 142  | 0       | NE | 0      | NE | 0     | NE |
| M5005_Spy_1672c | polC    | 1625475 | 1629872 | 1465 | 1       | E  | 1      | E  | 1     | E  |
| M5005_Spy_1673c | proS    | 1630127 | 1631983 | 618  | 1       | E  | 1      | E  | 1     | E  |
| M5005_Spy_1674c | eep     | 1632181 | 1633440 | 419  | 0       | NE | 0      | NE | 0     | NE |
| M5005_Spy_1675c | cdsA    | 1633513 | 1634307 | 264  | 1       | E  | 1      | E  | 1     | E  |
| M5005_Spy_1676c | uppS    | 1634320 | 1635069 | 249  | 0.9755  | U  | 1      | E  | 0.999 | E  |
| M5005_Spy_1677c | yajC    | 1635288 | 1635653 | 121  | 0       | NE | 0      | NE | 0     | NE |
| M5005_Spy_1678c | -       | 1635769 | 1636116 | 115  | 0       | NE | 0      | NE | 0     | NE |
| M5005_Spy_1680c | pulA    | 1638902 | 1639783 | 293  | 0       | NE | 0      | NE | 0     | NE |
| M5005_Spy_1681c | dexB    | 1639954 | 1641567 | 537  | 0       | NE | 0      | NE | 0     | NE |
| M5005_Spy_1682c | msmK    | 1641696 | 1642829 | 377  | 0       | NE | 0      | NE | 0     | NE |
| M5005_Spy_1683c | lrp     | 1643127 | 1643975 | 282  | 0       | NE | 0      | NE | 0     | NE |
| M5005_Spy_1684  | ska     | 1644335 | 1645657 | 440  | 0       | NE | 0      | NE | 0     | NE |
| M5005_Spy_1685c | dtd     | 1645755 | 1646198 | 147  | 0       | NE | 0      | NE | 0     | NE |
| M5005_Spy_1686c | relA    | 1646213 | 1648432 | 739  | 0.00125 | NE | 1      | E  | 1     | E  |
| M5005_Spy_1687c | sclA    | 1648684 | 1648827 | 47   | 0       | NE | 0      | NE | 0     | NE |
| M5005_Spy_1690  | nrdI2   | 1650113 | 1650595 | 160  | 0       | NE | 0      | NE | 0.001 | NE |
| M5005_Spy_1691c | -       | 1650989 | 1651807 | 272  | 0       | NE | 0      | NE | 0     | NE |
| M5005_Spy_1693c | -       | 1653782 | 1654075 | 97   | 0       | NE | 0      | NE | 0     | NE |
| M5005_Spy_1694c | -       | 1654433 | 1655182 | 249  | 0       | NE | 0      | NE | 0     | NE |
| M5005_Spy_1695c | prmA    | 1655182 | 1656135 | 317  | 0       | NE | 0      | NE | 0     | NE |
| M5005_Spy_1696c | -       | 1656206 | 1656676 | 156  | 0       | NE | 0      | NE | 0     | NE |
| M5005_Spy_1697  | papB    | 1656876 | 1658633 | 585  | 0       | NE | 0      | NE | 0     | NE |
| M5005_Spy_1698  | trpG    | 1658666 | 1659232 | 188  | 0       | NE | 0      | NE | 0.621 | U  |
| M5005_Spy_1699  | -       | 1659265 | 1660533 | 422  | 0       | NE | 0      | NE | 0     | NE |
| M5005_Spy_1700  | pai1    | 1661030 | 1661470 | 146  | 0       | NE | 0      | NE | 0     | NE |
| M5005_Spy_1701  | flaR    | 1661525 | 1662031 | 168  | 0       | NE | 0      | NE | 0     | NE |
| M5005_Spy_1702  | smeZ    | 1662280 | 1662981 | 233  | 0       | NE | 0      | NE | 0     | NE |
| M5005_Spy_1703c | -       | 1663265 | 1663531 | 88   | 0       | NE | 0      | NE | 0     | NE |
| M5005_Spy_1704  | dppA    | 1663710 | 1665338 | 542  | 0       | NE | 0      | NE | 0     | NE |
| M5005_Spy_1705  | dppB    | 1665451 | 1666428 | 325  | 0       | NE | 0      | NE | 0     | NE |
| M5005_Spy_1706  | dppC    | 1666425 | 1667246 | 273  | 0.00025 | NE | 0      | NE | 0     | NE |
| M5005_Spy_1707  | dppD    | 1667258 | 1668061 | 267  | 0       | NE | 0      | NE | 0     | NE |
| M5005_Spy_1708  | dppE    | 1668045 | 1668671 | 208  | 0       | NE | 0      | NE | 0     | NE |
| M5005_Spy_1709c | -       | 1668752 | 1668952 | 66   | 0       | NE | 0      | NE | 0     | NE |
| M5005_Spy_1710c | -       | 1669121 | 1671598 | 825  | 0.0025  | NE | 0      | NE | 0     | NE |
| M5005_Spy_1711c | lmb     | 1671611 | 1672531 | 306  | 0       | NE | 0      | NE | 0     | NE |
| M5005_Spy_1712c | -       | 1672709 | 1673842 | 377  | 0       | NE | 0      | NE | 0     | NE |
| M5005_Spy_1713c | -       | 1673896 | 1674048 | 50   | -1      | S  | -1     | S  | -1    | S  |
| M5005_Spy_1714c | -       | 1674093 | 1675160 | 355  | 0       | NE | 0      | NE | 0     | NE |
| M5005_Spy_1715c | scpA    | 1675257 | 1678751 | 1164 | 0       | NE | 0      | NE | 0     | NE |
| M5005_Spy_1716  | -       | 1679185 | 1680390 | 401  | 0       | NE | 0      | NE | 0     | NE |
| M5005_Spy_1717  | -       | 1680369 | 1680551 | 60   | -1      | S  | -1     | S  | -1    | S  |
| M5005_Spy_1718c | sic1.01 | 1680969 | 1681910 | 313  | 0       | NE | 0      | NE | 0     | NE |
| M5005_Spy_1719c | emm1.0  | 1682099 | 1683553 | 484  | 0       | NE | 0      | NE | 0     | NE |
| M5005_Spy_1720c | mga     | 1683738 | 1685327 | 529  | 0       | NE | 0      | NE | 0     | NE |

|                 |       |         |         |      |         |    |         |    |       |    |
|-----------------|-------|---------|---------|------|---------|----|---------|----|-------|----|
| M5005_Spy_1721  | -     | 1685712 | 1685897 | 61   | 0.9495  | U  | 0       | NE | 0.003 | NE |
| M5005_Spy_1722c | -     | 1686003 | 1686254 | 83   | 0       | NE | 0       | NE | 0     | NE |
| M5005_Spy_1723c | isp   | 1686333 | 1687934 | 533  | 0.00025 | NE | 0       | NE | 0     | NE |
| M5005_Spy_1724c | ihk   | 1688036 | 1689424 | 462  | 0       | NE | 0       | NE | 0     | NE |
| M5005_Spy_1725c | irr   | 1689421 | 1690074 | 217  | 0       | NE | 0       | NE | 0     | NE |
| M5005_Spy_1726c | -     | 1690168 | 1691385 | 405  | 0       | NE | 0       | NE | 0     | NE |
| M5005_Spy_1727c | -     | 1691398 | 1692072 | 224  | 0       | NE | 0       | NE | 0     | NE |
| M5005_Spy_1728c | -     | 1692059 | 1693327 | 422  | 0       | NE | 0       | NE | 0     | NE |
| M5005_Spy_1729c | -     | 1693750 | 1694154 | 134  | 0.00175 | NE | 0       | NE | 0     | NE |
| M5005_Spy_1730c | -     | 1694181 | 1694477 | 98   | 0       | NE | 0       | NE | 0     | NE |
| M5005_Spy_1731  | grm   | 1694721 | 1694957 | 78   | 0       | NE | 0       | NE | 0     | NE |
| M5005_Spy_1732c | prsA  | 1695233 | 1696162 | 309  | 0.00025 | NE | 0       | NE | 1     | E  |
| M5005_Spy_1733c | -     | 1696218 | 1696535 | 105  | 0       | NE | 0       | NE | 0     | NE |
| M5005_Spy_1734c | -     | 1696642 | 1696947 | 101  | 0       | NE | 0.00025 | NE | 0.003 | NE |
| M5005_Spy_1735c | speB  | 1696949 | 1698145 | 398  | 0       | NE | 0       | NE | 0     | NE |
| M5005_Spy_1736  | -     | 1698670 | 1698801 | 43   | -1      | S  | -1      | S  | -1    | S  |
| M5005_Spy_1737  | rgg   | 1699085 | 1699927 | 280  | 0       | NE | 0       | NE | 0     | NE |
| M5005_Spy_1738c | spd   | 1700168 | 1700983 | 271  | 0       | NE | 0       | NE | 0     | NE |
| M5005_Spy_1739  | -     | 1701067 | 1701195 | 42   | -1      | S  | -1      | S  | -1    | S  |
| M5005_Spy_1740  | -     | 1701347 | 1701856 | 169  | 0       | NE | 0       | NE | 0     | NE |
| M5005_Spy_1741c | gldA  | 1701938 | 1703026 | 362  | 0       | NE | 0       | NE | 0     | NE |
| M5005_Spy_1742c | mipB  | 1703083 | 1703751 | 222  | 0       | NE | 0       | NE | 0     | NE |
| M5005_Spy_1743c | pfID  | 1703764 | 1706136 | 790  | 0       | NE | 0       | NE | 0     | NE |
| M5005_Spy_1744c | -     | 1706391 | 1707695 | 434  | 0       | NE | 0       | NE | 0     | NE |
| M5005_Spy_1745c | -     | 1707705 | 1708013 | 102  | 0       | NE | 0       | NE | 0     | NE |
| M5005_Spy_1746c | -     | 1708041 | 1708361 | 106  | 0       | NE | 0       | NE | 0     | NE |
| M5005_Spy_1747c | -     | 1708649 | 1709629 | 326  | 0       | NE | 0       | NE | 0     | NE |
| M5005_Spy_1748c | -     | 1709645 | 1710394 | 249  | 0       | NE | 0       | NE | 0     | NE |
| M5005_Spy_1749  | -     | 1710517 | 1711290 | 257  | 0       | NE | 0       | NE | 0     | NE |
| M5005_Spy_1750  | -     | 1711325 | 1711525 | 66   | 0       | NE | 0       | NE | 0     | NE |
| M5005_Spy_1751c | secE  | 1711527 | 1711703 | 58   | 0.755   | U  | 0.998   | E  | 0.944 | U  |
| M5005_Spy_1752c | rpmG  | 1711717 | 1711869 | 50   | -1      | S  | -1      | S  | -1    | S  |
| M5005_Spy_1753c | pbp2A | 1711918 | 1714254 | 778  | 0       | NE | 0       | NE | 0     | NE |
| M5005_Spy_1754c | -     | 1714293 | 1714673 | 126  | 0       | NE | 0       | NE | 0     | NE |
| M5005_Spy_1755  | -     | 1715164 | 1715355 | 63   | 0       | NE | 0       | NE | 0     | NE |
| M5005_Spy_1756  | -     | 1715249 | 1716250 | 333  | 0       | NE | 0       | NE | 0     | NE |
| M5005_Spy_1757c | -     | 1716339 | 1717979 | 546  | 0       | NE | 0       | NE | 0     | NE |
| M5005_Spy_1758  | -     | 1718226 | 1719722 | 498  | 0       | NE | 0       | NE | 0     | NE |
| M5005_Spy_1759c | -     | 1720207 | 1720371 | 54   | 0       | NE | 0       | NE | 0     | NE |
| M5005_Spy_1760c | -     | 1720350 | 1720532 | 60   | 0       | NE | 0       | NE | 0     | NE |
| M5005_Spy_1761c | groEL | 1720925 | 1722556 | 543  | 0.773   | U  | 1       | E  | 1     | E  |
| M5005_Spy_1762c | groES | 1722592 | 1722882 | 96   | 0.00025 | NE | 0.9995  | E  | 0.998 | E  |
| M5005_Spy_1763c | clpC  | 1723060 | 1725504 | 814  | 0.00025 | NE | 0       | NE | 0.019 | NE |
| M5005_Spy_1764c | ctsR  | 1725504 | 1725965 | 153  | 0       | NE | 0       | NE | 0     | NE |
| M5005_Spy_1765c | csp   | 1726161 | 1726370 | 69   | 0       | NE | 0       | NE | 0.036 | NE |
| M5005_Spy_1766c | -     | 1726507 | 1726611 | 34   | -1      | S  | -1      | S  | -1    | S  |
| M5005_Spy_1767c | -     | 1726595 | 1727728 | 377  | 0       | NE | 0       | NE | 0     | NE |
| M5005_Spy_1768  | ahpC  | 1728685 | 1729245 | 186  | 0       | NE | 0       | NE | 0     | NE |
| M5005_Spy_1769  | ahpF  | 1729266 | 1730798 | 510  | 0.00025 | NE | 0       | NE | 0     | NE |
| M5005_Spy_1770c | hutI  | 1730856 | 1732121 | 421  | 0       | NE | 0       | NE | 0     | NE |
| M5005_Spy_1771  | hutU  | 1732413 | 1734443 | 676  | 0.00025 | NE | 0       | NE | 0     | NE |
| M5005_Spy_1772  | -     | 1734532 | 1735431 | 299  | 0       | NE | 0       | NE | 0     | NE |
| M5005_Spy_1773  | -     | 1735442 | 1736068 | 208  | 0       | NE | 0       | NE | 0     | NE |
| M5005_Spy_1774  | fhS.2 | 1736086 | 1737759 | 557  | 0       | NE | 0       | NE | 0     | NE |
| M5005_Spy_1775  | -     | 1737781 | 1738377 | 198  | 0       | NE | 0       | NE | 0     | NE |
| M5005_Spy_1776  | -     | 1738597 | 1739940 | 447  | 0.00025 | NE | 0       | NE | 0     | NE |
| M5005_Spy_1777  | hutH  | 1739951 | 1741492 | 513  | 0       | NE | 0       | NE | 0     | NE |
| M5005_Spy_1778  | hutG  | 1741678 | 1742664 | 328  | 0       | NE | 0       | NE | 0     | NE |
| M5005_Spy_1779c | -     | 1742695 | 1745769 | 1024 | 0       | NE | 0       | NE | 0     | NE |
| M5005_Spy_1780  | rpsB  | 1746073 | 1746840 | 255  | 0.64925 | U  | 1       | E  | 1     | E  |
| M5005_Spy_1781  | tsf   | 1746974 | 1748014 | 346  | 0.99575 | E  | 1       | E  | 1     | E  |
| M5005_Spy_1782c | pepO  | 1748180 | 1750075 | 631  | 0       | NE | 0       | NE | 0     | NE |
| M5005_Spy_1783c | dexS  | 1750283 | 1751911 | 542  | 0.00525 | NE | 0       | NE | 0.991 | U  |

|                 |           |         |         |     |         |    |         |    |       |    |
|-----------------|-----------|---------|---------|-----|---------|----|---------|----|-------|----|
| M5005_Spy_1784c | -         | 1751978 | 1754002 | 674 | 0       | NE | 0       | NE | 0.001 | NE |
| M5005_Spy_1785  | -         | 1754213 | 1754926 | 237 | 0       | NE | 0       | NE | 0.001 | NE |
| M5005_Spy_1786c | -         | 1755205 | 1755372 | 55  | 0.00025 | NE | 0       | NE | 0     | NE |
| M5005_Spy_1787  | -         | 1755730 | 1756587 | 285 | 0.00025 | NE | 0       | NE | 0     | NE |
| M5005_Spy_1788  | yaaA      | 1756629 | 1757360 | 243 | 0       | NE | 0       | NE | 0     | NE |
| M5005_Spy_1789c | nrdG      | 1757534 | 1758148 | 204 | 0       | NE | 0       | NE | 0.001 | NE |
| M5005_Spy_1790c | -         | 1758148 | 1758657 | 169 | 0.00025 | NE | 0       | NE | 0     | NE |
| M5005_Spy_1791c | -         | 1758666 | 1759601 | 311 | 0.0005  | NE | 0.5475  | U  | 0.001 | NE |
| M5005_Spy_1792c | -         | 1759630 | 1759776 | 48  | -1      | S  | -1      | S  | -1    | S  |
| M5005_Spy_1793c | nrdD      | 1759958 | 1762156 | 732 | 0.00025 | NE | 0.00025 | NE | 1     | E  |
| M5005_Spy_1794c | -         | 1762253 | 1763812 | 519 | 0       | NE | 0       | NE | 0     | NE |
| M5005_Spy_1795c | -         | 1764225 | 1764530 | 101 | 0       | NE | 0       | NE | 0     | NE |
| M5005_Spy_1796c | -         | 1764542 | 1764961 | 139 | 0.00025 | NE | 1       | E  | 1     | E  |
| M5005_Spy_1797c | -         | 1764958 | 1765227 | 89  | 0       | NE | 0       | NE | 0     | NE |
| M5005_Spy_1798c | spxA      | 1765340 | 1765738 | 132 | 0.00025 | NE | 0       | NE | 1     | E  |
| M5005_Spy_1799c | recA      | 1766029 | 1767165 | 378 | 0.00025 | NE | 0       | NE | 0.001 | NE |
| M5005_Spy_1800c | cinA      | 1767254 | 1768525 | 423 | 0       | NE | 0       | NE | 0     | NE |
| M5005_Spy_1801c | tag       | 1768594 | 1769154 | 186 | 0.842   | U  | 0       | NE | 0     | NE |
| M5005_Spy_1802c | ruvA      | 1769164 | 1769760 | 198 | 0.00025 | NE | 0       | NE | 0.737 | U  |
| M5005_Spy_1803c | lmrP      | 1769762 | 1770982 | 406 | 0       | NE | 0       | NE | 0     | NE |
| M5005_Spy_1804c | mutL      | 1770993 | 1772975 | 660 | 0.27475 | U  | 0       | NE | 0.006 | NE |
| M5005_Spy_1805c | mutS      | 1773104 | 1775659 | 851 | 0.26775 | U  | 0       | NE | 0     | NE |
| M5005_Spy_1806c | -         | 1775646 | 1775852 | 68  | 0       | NE | 0       | NE | 0     | NE |
| M5005_Spy_1807c | argR2     | 1775995 | 1776432 | 145 | 0       | NE | 0       | NE | 0     | NE |
| M5005_Spy_1808  | argS      | 1776723 | 1778414 | 563 | 0.8705  | U  | 1       | E  | 1     | E  |
| M5005_Spy_1809  | uviB      | 1778502 | 1778810 | 102 | 0       | NE | 0       | NE | 0     | NE |
| M5005_Spy_1810c | -         | 1778837 | 1779709 | 290 | 0       | NE | 0       | NE | 0     | NE |
| M5005_Spy_1811c | -         | 1779752 | 1780687 | 311 | 0       | NE | 0       | NE | 0     | NE |
| M5005_Spy_1812c | -         | 1780650 | 1781591 | 313 | 0       | NE | 0       | NE | 0.043 | NE |
| M5005_Spy_1813c | aspS      | 1781584 | 1783332 | 582 | 1       | E  | 1       | E  | 1     | E  |
| M5005_Spy_1814c | hisS      | 1783670 | 1784950 | 426 | 0.99725 | E  | 1       | E  | 1     | E  |
| M5005_Spy_1815  | rpmF      | 1785170 | 1785352 | 60  | 0.00025 | NE | 0       | NE | 0     | NE |
| M5005_Spy_1816  | rpmG      | 1785368 | 1785517 | 49  | -1      | S  | -1      | S  | -1    | S  |
| M5005_Spy_1817  | cadD      | 1785810 | 1786424 | 204 | 0       | NE | 0       | NE | 0     | NE |
| M5005_Spy_1818  | cadC      | 1786406 | 1786774 | 122 | 0       | NE | 0       | NE | 0     | NE |
| M5005_Spy_1819  | -         | 1786825 | 1787748 | 307 | 0       | NE | 0       | NE | 0     | NE |
| M5005_Spy_1820  | -         | 1787814 | 1788566 | 250 | 0       | NE | 0       | NE | 0     | NE |
| M5005_Spy_1821  | -         | 1788563 | 1789165 | 200 | 0       | NE | 0       | NE | 0     | NE |
| M5005_Spy_1822c | -         | 1789641 | 1789925 | 94  | 0.00025 | NE | 0       | NE | 0     | NE |
| M5005_Spy_1823  | -         | 1790376 | 1791218 | 280 | 0.00025 | NE | 0       | NE | 0     | NE |
| M5005_Spy_1824c | -         | 1791265 | 1791906 | 213 | 0       | NE | 0       | NE | 0     | NE |
| M5005_Spy_1825  | -         | 1792113 | 1792439 | 108 | 0       | NE | 0       | NE | 0     | NE |
| M5005_Spy_1826  | -         | 1792426 | 1793013 | 195 | 0       | NE | 0       | NE | 0.001 | NE |
| M5005_Spy_1827  | -         | 1793010 | 1794089 | 359 | 0.00025 | NE | 0       | NE | 0.001 | NE |
| M5005_Spy_1828c | -         | 1794207 | 1796075 | 622 | 0       | NE | 0       | NE | 0     | NE |
| M5005_Spy_1830  | -         | 1796614 | 1797147 | 177 | 0       | NE | 0       | NE | 0     | NE |
| M5005_Spy_1831c | rpsD      | 1797301 | 1797912 | 203 | 1       | E  | 1       | E  | 1     | E  |
| M5005_Spy_1832c | -         | 1798115 | 1798219 | 34  | -1      | S  | -1      | S  | -1    | S  |
| M5005_Spy_1833c | -         | 1798203 | 1799336 | 377 | 0       | NE | 0       | NE | 0     | NE |
| M5005_Spy_1834c | -         | 1799968 | 1800240 | 90  | 0.00025 | NE | 0       | NE | 0.002 | NE |
| M5005_Spy_1835c | holB/dnaC | 1800257 | 1801624 | 455 | 1       | E  | 1       | E  | 1     | E  |
| M5005_Spy_1836c | rplI      | 1801654 | 1802106 | 150 | 0       | NE | 0       | NE | 0     | NE |
| M5005_Spy_1837c | -         | 1802103 | 1804079 | 658 | 0.00025 | NE | 0       | NE | 0.001 | NE |
| M5005_Spy_1838c | gidA      | 1804170 | 1806068 | 632 | 0.00075 | NE | 0       | NE | 1     | E  |
| M5005_Spy_1839c | -         | 1806192 | 1806509 | 105 | 0       | NE | 0       | NE | 0     | NE |
| M5005_Spy_1840c | mnmA      | 1807286 | 1808407 | 373 | 1       | E  | 1       | E  | 1     | E  |
| M5005_Spy_1841  | sdhB      | 1808705 | 1809376 | 223 | 0       | NE | 0       | NE | 0     | NE |
| M5005_Spy_1842  | sdhA      | 1809388 | 1810260 | 290 | 0.00025 | NE | 0       | NE | 0     | NE |
| M5005_Spy_1843c | -         | 1810673 | 1811287 | 204 | 0       | NE | 0       | NE | 0     | NE |
| M5005_Spy_1844c | cbiQ      | 1811659 | 1812459 | 266 | 0       | NE | 0.9905  | U  | 1     | E  |
| M5005_Spy_1845c | cbiO      | 1812452 | 1813294 | 280 | 1       | E  | 1       | E  | 1     | E  |
| M5005_Spy_1846c | cbiO      | 1813270 | 1814160 | 296 | 0       | NE | 1       | E  | 1     | E  |
| M5005_Spy_1847c | pgsA      | 1814111 | 1814653 | 180 | 0.008   | NE | 1       | E  | 0.731 | U  |

|                 |      |         |         |     |         |    |    |    |       |    |
|-----------------|------|---------|---------|-----|---------|----|----|----|-------|----|
| M5005_Spy_1848c | -    | 1814667 | 1815692 | 341 | 0       | NE | 0  | NE | 0.001 | NE |
| M5005_Spy_1849c | -    | 1815742 | 1817031 | 429 | 0       | NE | 0  | NE | 0     | NE |
| M5005_Spy_1850c | -    | 1817033 | 1818277 | 414 | 0       | NE | 0  | NE | 0     | NE |
| M5005_Spy_1851  | hasA | 1818708 | 1819967 | 419 | 0.00025 | NE | 0  | NE | 0     | NE |
| M5005_Spy_1852  | hasB | 1820003 | 1821211 | 402 | 0       | NE | 0  | NE | 0     | NE |
| M5005_Spy_1853  | hasC | 1821393 | 1822307 | 304 | 0       | NE | 0  | NE | 0     | NE |
| M5005_Spy_1854  | -    | 1822615 | 1823028 | 137 | 0       | NE | 0  | NE | 0     | NE |
| M5005_Spy_1855  | recF | 1823030 | 1824136 | 368 | 0       | NE | 0  | NE | 0     | NE |
| M5005_Spy_1856c | -    | 1824191 | 1825024 | 277 | 0.00025 | NE | 0  | NE | 0     | NE |
| M5005_Spy_1857c | guaB | 1825256 | 1826737 | 493 | 0       | NE | 0  | NE | 0     | NE |
| M5005_Spy_1858c | trsA | 1827045 | 1828067 | 340 | 1       | E  | 1  | E  | 1     | E  |
| M5005_Spy_1859c | -    | 1828159 | 1828284 | 41  | -1      | S  | -1 | S  | -1    | S  |
| M5005_Spy_1860  | -    | 1828486 | 1829358 | 290 | 0       | NE | 0  | NE | 0     | NE |
| M5005_Spy_1861  | -    | 1829437 | 1831056 | 539 | 0.00025 | NE | 0  | NE | 0     | NE |
| M5005_Spy_1862  | -    | 1831139 | 1833715 | 858 | 0       | NE | 0  | NE | 0     | NE |
| M5005_Spy_1863c | -    | 1834881 | 1835162 | 93  | 0       | NE | 0  | NE | 0     | NE |
| M5005_Spy_1864c | -    | 1835744 | 1836223 | 159 | 0       | NE | 0  | NE | 0     | NE |
| M5005_Spy_1865  | htrA | 1836435 | 1837658 | 407 | 0.00025 | NE | 0  | NE | 1     | E  |
| M5005_Spy_1866  | parB | 1837717 | 1838523 | 268 | 0.00025 | NE | 0  | NE | 0     | NE |



**Table S4. Integrated gene essentiality determination for GAS M1T1 5448 for all time points.**

(a) Spy numbers from MGAS5005 genome.

(b) When available, gene name is provided.

(c) Call integrating data from Bayesian analyses on 3 time points.

(d) Hyperlink to the NCBI Gene website (<http://www.ncbi.nlm.nih.gov/gene>).

(e) Information on transcription units based on the work of McClure *et al.* (2013).

(f) Asterisks refer to genes found in the GAS core genome.

| Locus Tag(a)    | Gene Name(b) | Call(c) | Start | Stop  | Length | Strand | Gene ID(d)              | COG Designation | Protein Function                                | Transcriptional Unit (e) |     | Part of GAS Core Genome (f) |
|-----------------|--------------|---------|-------|-------|--------|--------|-------------------------|-----------------|-------------------------------------------------|--------------------------|-----|-----------------------------|
|                 |              |         |       |       |        |        |                         |                 |                                                 | Strand:                  | + - |                             |
| M5005_Spy_0001  | dnaA         | E       | 202   | 1557  | 451    | +      | <a href="#">3571011</a> | COG0593L        | chromosome replication initiator DnaA           |                          |     | *                           |
| M5005_Spy_0002  | dnaN         | E       | 1712  | 2848  | 378    | +      | <a href="#">3571012</a> | COG0592L        | DNA polymerase III subunit beta                 |                          |     | *                           |
| M5005_Spy_0003  | -            | NE      | 2923  | 3120  | 65     | +      | <a href="#">3571013</a> | COG4481S        | hypothetical protein M5005_Spy_0003             |                          |     | *                           |
| M5005_Spy_0004  | ychF         | NE      | 3450  | 4565  | 371    | +      | <a href="#">3571014</a> | COG0012J        | GTP-dependent nucleic acid-binding protein EngD |                          |     | *                           |
| M5005_Spy_0005  | pth          | NC      | 4635  | 5204  | 189    | +      | <a href="#">3571015</a> | COG0193J        | peptidyl-tRNA hydrolase                         |                          |     | *                           |
| M5005_Spy_0006  | trcF         | NE      | 5207  | 8710  | 1167   | +      | <a href="#">3571016</a> | COG1197LK       | transcription-repair coupling factor            |                          |     | *                           |
| M5005_Spy_0007  | -            | NE      | 8872  | 9144  | 90     | +      | <a href="#">3572946</a> | COG1188J        | heat shock protein 15                           |                          |     | *                           |
| M5005_Spy_0008  | divIC        | NE      | 9131  | 9502  | 123    | +      | <a href="#">3572947</a> | COG2919D        | cell division protein                           |                          |     | *                           |
| M5005_Spy_0009  | -            | NC      | 9499  | 9624  | 41     | +      | <a href="#">3572948</a> | -               | hypothetical protein M5005_Spy_0009             |                          |     | *                           |
| M5005_Spy_0010  | -            | NE      | 9637  | 10923 | 428    | +      | <a href="#">3572949</a> | COG2367V        | beta-lactamase                                  |                          |     | *                           |
| M5005_Spy_0011  | tilS/mesJ    | E       | 10920 | 12206 | 428    | +      | <a href="#">3572950</a> | COG0037D        | tRNA(Ile)-lysidine synthetase                   |                          |     | *                           |
| M5005_Spy_0012  | hpt          | NC      | 12211 | 12753 | 180    | +      | <a href="#">3572951</a> | COG0634F        | hypoxanthine-guanine phosphoribosyltransferase  |                          |     | *                           |
| M5005_Spy_0013  | ftsH         | E       | 12775 | 14754 | 659    | +      | <a href="#">3572952</a> | COG0465O        | cell division protein                           |                          |     | *                           |
| M5005_Spy_0014  | -            | NE      | 15079 | 16470 | 463    | +      | <a href="#">3572953</a> | COG0531E        | amino acid permease                             |                          |     | *                           |
| M5005_Spy_0015c | -            | NC      | 16811 | 16945 | 44     | -      | <a href="#">3572954</a> | -               | hypothetical protein M5005_Spy_0015             |                          |     | *                           |
| M5005_Spy_0017  | sibA         | E       | 31134 | 32330 | 398    | +      | <a href="#">3572901</a> | COG3883S        | secreted protein                                |                          |     | *                           |
| M5005_Spy_0018  | prsA.2       | E       | 32583 | 33545 | 320    | +      | <a href="#">3572902</a> | COG0462FE       | ribose-phosphate pyrophosphokinase              |                          |     | *                           |
| M5005_Spy_0019  | recO         | NE      | 33731 | 34486 | 251    | +      | <a href="#">3572903</a> | COG1381L        | DNA repair protein RecO                         |                          |     | *                           |
| M5005_Spy_0020  | plsX         | E       | 34589 | 35596 | 335    | +      | <a href="#">3572904</a> | COG0416I        | glycerol-3-phosphate acyltransferase            |                          |     | *                           |
| M5005_Spy_0021  | acpP.2       | NC      | 35589 | 35831 | 80     | +      | <a href="#">3572905</a> | COG0236IQ       | acyl carrier protein                            |                          |     | *                           |
| M5005_Spy_0022  | -            | NC      | 35952 | 36686 | 244    | +      | <a href="#">3572906</a> | COG0152F        | synthase                                        |                          |     | *                           |
| M5005_Spy_0023  | -            | NE      | 36762 | 40535 | 1257   | +      | <a href="#">3572907</a> | COG0046F        | phosphoribosylformylglycinamide synthase        |                          |     | *                           |
| M5005_Spy_0024  | purF         | NE      | 40696 | 42150 | 484    | +      | <a href="#">3572908</a> | COG0034F        | amidophosphoribosyltransferase                  |                          |     | *                           |
| M5005_Spy_0025  | purM         | NE      | 42178 | 43200 | 340    | +      | <a href="#">3572909</a> | COG0150F        | phosphoribosylaminoimidazole synthetase         |                          |     | *                           |
| M5005_Spy_0026  | purN         | NE      | 43368 | 43922 | 184    | +      | <a href="#">3572910</a> | COG0299F        | phosphoribosylglycinamide formyltransferase     |                          |     | *                           |
| M5005_Spy_0027  | purH         | NE      | 44106 | 45653 | 515    | +      | <a href="#">3572911</a> | COG0138F        | phosphoribosylaminoimidazolecarboxamide         |                          |     | *                           |
| M5005_Spy_0028c | -            | NE      | 45711 | 46835 | 374    | -      | <a href="#">3572912</a> | COG3942R        | autolysin                                       |                          |     | *                           |
| M5005_Spy_0029  | purD         | NE      | 46998 | 48353 | 451    | +      | <a href="#">3572913</a> | COG0151F        | phosphoribosylamine--glycine ligase             |                          |     | *                           |
| M5005_Spy_0030  | purE         | NE      | 48511 | 49122 | 203    | +      | <a href="#">3572914</a> | COG0041F        | subunit                                         |                          |     | *                           |
| M5005_Spy_0031  | purK         | NE      | 49106 | 50182 | 358    | +      | <a href="#">3572915</a> | COG0026F        | subunit                                         |                          |     | *                           |
| M5005_Spy_0032  | -            | NE      | 50209 | 51852 | 547    | +      | <a href="#">3572916</a> | -               | hypothetical protein M5005_Spy_0032             |                          |     | *                           |
| M5005_Spy_0033  | purB         | NE      | 51870 | 53162 | 430    | +      | <a href="#">3572917</a> | COG0015F        | adenylosuccinate lyase                          |                          |     | *                           |
| M5005_Spy_0034  | -            | NE      | 53294 | 54205 | 303    | +      | <a href="#">3572880</a> | -               | transcriptional regulator                       |                          |     | *                           |
| M5005_Spy_0035  | ruvB         | NE      | 54431 | 55429 | 332    | +      | <a href="#">3572881</a> | COG2255L        | Holliday junction DNA helicase RuvB             |                          |     | *                           |
| M5005_Spy_0036  | -            | NE      | 55567 | 56004 | 145    | +      | <a href="#">3572882</a> | COG0394T        | protein tyrosine phosphatase                    |                          |     | *                           |
| M5005_Spy_0037  | -            | NC      | 56027 | 56428 | 133    | +      | <a href="#">3572883</a> | COG4642S        | hypothetical protein M5005_Spy_0037             |                          |     | *                           |
| M5005_Spy_0038  | -            | E       | 56425 | 58200 | 591    | +      | <a href="#">3572884</a> | COG1835I        | acyltransferase                                 |                          |     | *                           |
| M5005_Spy_0039  | adh2/adhE    | NE      | 58509 | 61151 | 880    | +      | <a href="#">3572885</a> | COG1454C        | dehydrogenase                                   |                          |     | *                           |
| M5005_Spy_0040  | adhA/adhP    | NE      | 61403 | 62419 | 338    | +      | <a href="#">3572886</a> | COG1064R        | alcohol dehydrogenase                           |                          |     | *                           |
| M5005_Spy_0041  | norM         | NE      | 62807 | 63778 | 323    | +      | <a href="#">3572887</a> | COG0534V        | Na+ driven multidrug efflux pump                |                          |     | *                           |
| M5005_Spy_0043  | rpsJ         | E       | 64301 | 64609 | 102    | +      | <a href="#">3572889</a> | COG0051J        | 30S ribosomal protein S10                       |                          |     | *                           |
| M5005_Spy_0044  | rplC         | E       | 64825 | 65451 | 208    | +      | <a href="#">3572890</a> | COG0087J        | 50S ribosomal protein L3                        |                          |     | *                           |
| M5005_Spy_0045  | rplD         | E       | 65475 | 66098 | 207    | +      | <a href="#">3572891</a> | COG0088J        | 50S ribosomal protein L4                        |                          |     | *                           |
| M5005_Spy_0046  | rplW         | NE      | 66098 | 66394 | 98     | +      | <a href="#">3572892</a> | COG0089J        | 50S ribosomal protein L23                       |                          |     | *                           |
| M5005_Spy_0047  | rplB         | E       | 66412 | 67245 | 277    | +      | <a href="#">3572893</a> | COG0090J        | 50S ribosomal protein L2                        |                          |     | *                           |
| M5005_Spy_0048  | rpsS         | C       | 67384 | 67662 | 92     | +      | <a href="#">3572894</a> | COG0185J        | 30S ribosomal protein S19                       |                          |     | *                           |
| M5005_Spy_0049  | rplV         | E       | 67678 | 68022 | 114    | +      | <a href="#">3572895</a> | COG0091J        | 50S ribosomal protein L22                       |                          |     | *                           |
| M5005_Spy_0050  | rpsC         | E       | 68035 | 68688 | 217    | +      | <a href="#">3572896</a> | COG0092J        | 30S ribosomal protein S3                        |                          |     | *                           |

|                 |          |    |         |        |      |   |                         |            |                                                      |   |
|-----------------|----------|----|---------|--------|------|---|-------------------------|------------|------------------------------------------------------|---|
| M5005_Spy_0051  | rplP     | E  | 68692   | 69105  | 137  | + | <a href="#">3572897</a> | COG0197J   | 50S ribosomal protein L16                            | * |
| M5005_Spy_0052  | rpmC     | NE | 69115   | 69321  | 68   | + | <a href="#">3572898</a> | COG0255J   | 50S ribosomal protein L29                            | * |
| M5005_Spy_0053  | rpsQ     | NC | 69347   | 69607  | 86   | + | <a href="#">3572899</a> | COG0186J   | 30S ribosomal protein S17                            | * |
| M5005_Spy_0054  | rplN     | C  | 69632   | 70000  | 122  | + | <a href="#">3572861</a> | COG0093J   | 50S ribosomal protein L14                            | * |
| M5005_Spy_0055  | rplX     | NC | 70079   | 70384  | 101  | + | <a href="#">3572862</a> | COG0198J   | 50S ribosomal protein L24                            | * |
| M5005_Spy_0056  | rplE     | NC | 70408   | 70950  | 180  | + | <a href="#">3572863</a> | COG0094J   | 50S ribosomal protein L5                             | * |
| M5005_Spy_0057  | rpsN     | NC | 70966   | 71151  | 61   | + | <a href="#">3572864</a> | COG0199J   | 30S ribosomal protein S14                            | * |
| M5005_Spy_0058  | rpsH     | NC | 71302   | 71700  | 132  | + | <a href="#">3572865</a> | COG0096J   | 30S ribosomal protein S8                             | * |
| M5005_Spy_0059  | rplF     | E  | 71903   | 72439  | 178  | + | <a href="#">3572866</a> | COG0097J   | 50S ribosomal protein L6                             | * |
| M5005_Spy_0060  | rplR     | NC | 72544   | 72900  | 118  | + | <a href="#">3572867</a> | COG0256J   | 50S ribosomal protein L18                            | * |
| M5005_Spy_0061  | rpsE     | E  | 72919   | 73413  | 164  | + | <a href="#">3572868</a> | COG0098J   | 30S ribosomal protein S5                             | * |
| M5005_Spy_0062  | rpmD     | E  | 73428   | 73610  | 60   | + | <a href="#">3572869</a> | COG1841J   | 50S ribosomal protein L30                            | * |
| M5005_Spy_0063  | rplO     | NE | 73824   | 74264  | 146  | + | <a href="#">3572870</a> | COG0200J   | 50S ribosomal protein L15                            | * |
| M5005_Spy_0064  | secY     | E  | 74281   | 75585  | 434  | + | <a href="#">3572871</a> | COG0201U   | preprotein translocase subunit SecY                  | * |
| M5005_Spy_0065  | adk      | NC | 75735   | 76373  | 212  | + | <a href="#">3572872</a> | COG0563F   | adenylate kinase                                     | * |
| M5005_Spy_0066  | infA     | E  | 76491   | 76709  | 72   | + | <a href="#">3572873</a> | COG0361J   | translation initiation factor IF-1                   | * |
| M5005_Spy_0067  | rpmJ     | NC | 76735   | 76851  | 38   | + | <a href="#">3572874</a> | COG0257J   | 50S ribosomal protein L36                            | * |
| M5005_Spy_0068  | rpsM     | E  | 76869   | 77234  | 121  | + | <a href="#">3572875</a> | COG0099J   | 30S ribosomal protein S13                            | * |
| M5005_Spy_0069  | rpsK     | E  | 77252   | 77635  | 127  | + | <a href="#">3572876</a> | COG0100J   | 30S ribosomal protein S11                            | * |
| M5005_Spy_0070  | rpoA     | E  | 77681   | 78619  | 312  | + | <a href="#">3572877</a> | COG0202K   | DNA-directed RNA polymerase subunit alpha            | * |
| M5005_Spy_0071  | rplQ     | E  | 78634   | 79020  | 128  | + | <a href="#">3572878</a> | COG0203J   | 50S ribosomal protein L17                            | * |
| M5005_Spy_0072c | -        | NC | 79618   | 79752  | 44   | - | <a href="#">3572879</a> | -          | hypothetical protein M5005_Spy_0072                  | * |
| M5005_Spy_0073  | -        | NC | 86264   | 86449  | 61   | + | <a href="#">3572845</a> | -          | hypothetical protein M5005_Spy_0073                  | * |
| M5005_Spy_0074  | -        | NC | 87087   | 87224  | 45   | + | <a href="#">3572846</a> | COG1947I   | 4-diphosphocytidyl-2-C-methyl-D-erythritol kinase    | * |
| M5005_Spy_0075  | -        | NC | 87235   | 87393  | 52   | + | <a href="#">3572847</a> | COG1947I   | partial                                              | * |
| M5005_Spy_0076  | -        | NC | 87499   | 87660  | 53   | + | <a href="#">3572848</a> | COG1947I   | 4-diphosphocytidyl-2-C-methyl-D-erythritol kinase    | * |
| M5005_Spy_0077  | adcR     | NE | 87770   | 88213  | 147  | + | <a href="#">3572849</a> | COG1846K   | MarR family transcriptional regulator                | * |
| M5005_Spy_0078  | adcC     | NE | 88217   | 88936  | 239  | + | <a href="#">3572850</a> | COG1121P   | high-affinity zinc uptake system ATP-binding protein | * |
| M5005_Spy_0079  | adcB     | NE | 88929   | 89744  | 271  | + | <a href="#">3572819</a> | COG1108P   | high-affinity zinc uptake system membrane protein    | * |
| M5005_Spy_0080c | -        | NE | 89784   | 90167  | 127  | - | <a href="#">3572820</a> | COG0537FGR | bis(5'-nucleosyl)-tetraphosphatase (asymmetrical)    | * |
| M5005_Spy_0081c | tyrS     | E  | 90218   | 91474  | 418  | - | <a href="#">3572821</a> | COG0162J   | tyrosyl-tRNA synthetase                              | * |
| M5005_Spy_0082  | pbp1b    | NE | 91566   | 93878  | 770  | + | <a href="#">3572822</a> | COG0744M   | 1B                                                   | * |
| M5005_Spy_0083  | rpoB     | E  | 94142   | 97708  | 1188 | + | <a href="#">3572823</a> | COG0085K   | DNA-directed RNA polymerase subunit beta             | * |
| M5005_Spy_0084  | rpoC     | E  | 97799   | 101440 | 1213 | + | <a href="#">3572824</a> | COG0086K   | DNA-directed RNA polymerase subunit beta'            | * |
| M5005_Spy_0085  | -        | NE | 101592  | 101957 | 121  | + | <a href="#">3572825</a> | COG4699S   | DNA binding protein                                  | * |
| M5005_Spy_0086  | comYA    | NE | 102050  | 102988 | 312  | + | <a href="#">3572826</a> | COG2804NU  | competence protein ComG                              | * |
| M5005_Spy_0087  | comYB    | NE | 102867  | 103958 | 363  | + | <a href="#">3572827</a> | COG1459NU  | competence protein ComG                              | * |
| M5005_Spy_0088  | comYC    | NE | 103960  | 104286 | 108  | + | <a href="#">3572828</a> | COG4537U   | competence protein ComG                              | * |
| M5005_Spy_0089  | -        | NE | 104360  | 104689 | 109  | + | <a href="#">3572829</a> | -          | competence protein ComG                              | * |
| M5005_Spy_0090  | -        | NE | 104646  | 104930 | 94   | + | <a href="#">3572830</a> | -          | hypothetical protein M5005_Spy_0090                  | * |
| M5005_Spy_0091  | comYD    | NE | 104923  | 105357 | 144  | + | <a href="#">3572831</a> | COG4940U   | competence protein ComG                              | * |
| M5005_Spy_0092  | -        | NE | 105341  | 105667 | 108  | + | <a href="#">3572832</a> | -          | competence protein ComG                              | * |
| M5005_Spy_0093  | -        | NE | 105765  | 106718 | 317  | + | <a href="#">3572833</a> | COG0827L   | adenine-specific methyltransferase                   | * |
| M5005_Spy_0094  | ackA     | NE | 106777  | 107973 | 398  | + | <a href="#">3572834</a> | COG0282C   | acetate kinase                                       | * |
| M5005_Spy_0095  | -        | NE | 108160  | 108468 | 102  | + | <a href="#">3572835</a> | -          | hypothetical protein M5005_Spy_0095                  | * |
| M5005_Spy_0096c | proC     | NE | 108551  | 109321 | 256  | - | <a href="#">3572836</a> | COG0345E   | pyrroline-5-carboxylate reductase                    | * |
| M5005_Spy_0097c | pepA     | NE | 109369  | 110436 | 355  | - | <a href="#">3572837</a> | COG1363G   | glutamyl aminopeptidase                              | * |
| M5005_Spy_0098  | -        | NC | 110546  | 110710 | 54   | - | <a href="#">3572838</a> | -          | hypothetical protein M5005_Spy_0098                  | * |
| M5005_Spy_0099  | -        | NE | 1110892 | 111185 | 97   | + | <a href="#">3572800</a> | -          | hypothetical protein M5005_Spy_0099                  | * |
| M5005_Spy_0100  | trx.1    | NE | 111182  | 111499 | 105  | + | <a href="#">3572801</a> | COG0526OC  | thioredoxin                                          | * |
| M5005_Spy_0101  | -        | NE | 111517  | 112143 | 208  | + | <a href="#">3572802</a> | COG0073R   | tRNA-binding domain-containing protein               | * |
| M5005_Spy_0102  | ssb      | NE | 112295  | 112690 | 131  | + | <a href="#">3572803</a> | COG0629L   | single-stranded DNA-binding protein                  | * |
| M5005_Spy_0103c | -        | NE | 112950  | 113591 | 213  | - | <a href="#">3572804</a> | COG1428F   | deoxyadenosine kinase/deoxyguanosine kinase          | * |
| M5005_Spy_0104c | -        | NE | 113611  | 114588 | 325  | - | <a href="#">3572805</a> | COG0042J   | tRNA-dihydrouridine synthase                         | * |
| M5005_Spy_0105c | hslO     | NE | 114575  | 115447 | 290  | - | <a href="#">3572806</a> | COG1281O   | heat shock protein 33                                | * |
| M5005_Spy_0106c | rofA/nra | NE | 115594  | 117087 | 497  | - | <a href="#">3572807</a> | -          | transcriptional regulator                            | * |
| M5005_Spy_0107  | cbp      | NE | 117335  | 119623 | 762  | + | <a href="#">3572808</a> | -          | fibronectin-binding protein                          | * |
| M5005_Spy_0108  | lepA-1   | NE | 119616  | 120173 | 185  | + | <a href="#">3572809</a> | -          | signal peptidase I                                   | * |
| M5005_Spy_0109  | prtF     | NE | 120206  | 121228 | 340  | + | <a href="#">3572810</a> | -          | fibronectin-binding protein                          | * |

|                 |          |    |        |        |     |   |                         |           |                                                     |   |
|-----------------|----------|----|--------|--------|-----|---|-------------------------|-----------|-----------------------------------------------------|---|
| M5005_Spy_0110  | eftLSL.B | NE | 121238 | 121951 | 237 | + | <a href="#">3572811</a> | COG4509S  | hypothetical protein M5005_Spy_0110                 |   |
| M5005_Spy_0111  | -        | NE | 121973 | 122620 | 215 | + | <a href="#">3572812</a> | -         | hypothetical protein M5005_Spy_0111                 |   |
| M5005_Spy_0112c | -        | NE | 122807 | 124129 | 440 | - | <a href="#">3572813</a> | COG3436L  | transposase                                         |   |
| M5005_Spy_0113c | -        | NE | 124370 | 124720 | 116 | - | <a href="#">3572814</a> | COG3436L  | transposase                                         |   |
| M5005_Spy_0114  | -        | NE | 125024 | 125779 | 251 | + | <a href="#">3572815</a> | COG3764M  | sortase                                             |   |
| M5005_Spy_0115c | -        | NE | 125973 | 126638 | 221 | - | <a href="#">3572816</a> | -         | hypothetical protein M5005_Spy_0115                 | * |
| M5005_Spy_0116  | atoE     | NE | 126987 | 128393 | 468 | + | <a href="#">3572817</a> | COG2031I  | short-chain fatty acids transporter                 | * |
| M5005_Spy_0117c | -        | NE | 128461 | 128856 | 131 | - | <a href="#">3572818</a> | -         | LysR family transcriptional regulator               |   |
| M5005_Spy_0118c | -        | NE | 128952 | 129371 | 139 | - | <a href="#">3572780</a> | COG0583K  | LysR family transcriptional regulator               |   |
| M5005_Spy_0119  | -        | NE | 129492 | 130676 | 394 | + | <a href="#">3572781</a> | COG0183I  | acetyl-CoA acetyltransferase                        |   |
| M5005_Spy_0120  | atoD.2   | NE | 130688 | 131347 | 219 | + | <a href="#">3572782</a> | COG1788I  | acetate CoA-transferase subunit alpha               |   |
| M5005_Spy_0121  | -        | NE | 131350 | 131997 | 215 | + | <a href="#">3572783</a> | COG2057I  | acetyl-CoA:acetoacetyl-CoA transferase subunit beta | * |
| M5005_Spy_0122c | -        | NE | 132119 | 132799 | 226 | - | <a href="#">3572784</a> | COG2964S  | DNA-binding protein                                 |   |
| M5005_Spy_0123  | -        | NE | 132973 | 133338 | 121 | + | <a href="#">3572785</a> | COG0251J  | translation initiation inhibitor                    | * |
| M5005_Spy_0124  | sloR     | NE | 133375 | 134394 | 339 | + | <a href="#">3572786</a> | COG1299G  | transcriptional regulator                           | * |
| M5005_Spy_0125  | -        | NE | 134849 | 135169 | 106 | + | <a href="#">3572787</a> | -         | hypothetical protein M5005_Spy_0125                 | * |
| M5005_Spy_0126  | ntpI     | NE | 135159 | 137180 | 673 | + | <a href="#">3572788</a> | COG1269C  | V-type ATP synthase subunit I                       | * |
| M5005_Spy_0127  | ntpK     | NE | 137182 | 137661 | 159 | + | <a href="#">3572789</a> | COG0636C  | V-type ATP synthase subunit K                       | * |
| M5005_Spy_0128  | ntpE     | NE | 137729 | 138313 | 194 | + | <a href="#">3572790</a> | -         | V-type sodium ATP synthase subunit E                | * |
| M5005_Spy_0129  | ntpC     | NE | 138329 | 139327 | 332 | + | <a href="#">3572791</a> | COG1527C  | V-type ATP synthase subunit C                       | * |
| M5005_Spy_0130  | ntpF     | NE | 139324 | 139644 | 106 | + | <a href="#">3572792</a> | COG1436C  | V-type ATP synthase subunit F                       |   |
| M5005_Spy_0131  | ntpA     | NE | 139845 | 141620 | 591 | + | <a href="#">3572793</a> | COG1155C  | V-type ATP synthase subunit A                       | * |
| M5005_Spy_0132  | ntpB     | NE | 141621 | 143036 | 471 | + | <a href="#">3572794</a> | COG1156C  | V-type ATP synthase subunit B                       | * |
| M5005_Spy_0133  | ntpD     | NE | 143081 | 143707 | 208 | + | <a href="#">3572795</a> | COG1394C  | V-type ATP synthase subunit D                       | * |
| M5005_Spy_0134c | -        | NE | 143827 | 145089 | 420 | - | <a href="#">3572796</a> | COG3853P  | tellurite resistance protein                        | * |
| M5005_Spy_0135c | -        | NE | 145102 | 145980 | 292 | - | <a href="#">3572797</a> | -         | hypothetical protein M5005_Spy_0135                 | * |
| M5005_Spy_0136  | purA     | NE | 146418 | 147710 | 430 | + | <a href="#">3572798</a> | COG0104F  | adenylosuccinate synthetase                         | * |
| M5005_Spy_0137  | -        | NE | 148037 | 149080 | 347 | + | <a href="#">3572799</a> | COG1744R  | nucleoside-binding protein                          | * |
| M5005_Spy_0138  | nusG     | C  | 149253 | 149792 | 179 | + | <a href="#">3572761</a> | COG0250K  | transcription antitermination protein NusG          | * |
| M5005_Spy_0139  | nga      | NE | 150154 | 151518 | 454 | + | <a href="#">3572762</a> | -         | NAD glycohydrolase                                  | * |
| M5005_Spy_0140  | -        | NE | 151523 | 152008 | 161 | + | <a href="#">3572763</a> | -         | hypothetical protein M5005_Spy_0140                 |   |
| M5005_Spy_0141  | slo      | NE | 152032 | 153747 | 571 | + | <a href="#">3572764</a> | -         | streptolysin O                                      | * |
| M5005_Spy_0142  | -        | NE | 154002 | 154433 | 143 | + | <a href="#">3572765</a> | -         | hypothetical protein M5005_Spy_0142                 |   |
| M5005_Spy_0143c | -        | NE | 154619 | 154855 | 78  | - | <a href="#">3572766</a> | -         | hypothetical protein M5005_Spy_0143                 |   |
| M5005_Spy_0144c | -        | NC | 155265 | 155432 | 55  | - | <a href="#">3572767</a> | -         | hypothetical protein M5005_Spy_0144                 |   |
| M5005_Spy_0145c | -        | NE | 155607 | 155894 | 95  | - | <a href="#">3572768</a> | -         | hypothetical protein M5005_Spy_0145                 |   |
| M5005_Spy_0146  | metB     | NE | 156335 | 157525 | 396 | + | <a href="#">3572769</a> | COG0626E  | cystathionine beta-lyase                            |   |
| M5005_Spy_0147  | leuS     | E  | 157736 | 160237 | 833 | + | <a href="#">3572770</a> | COG0495J  | leucyl-tRNA synthetase                              | * |
| M5005_Spy_0148  | ulaA     | NC | 160544 | 161977 | 477 | + | <a href="#">3572771</a> | COG3037S  | IIC                                                 | * |
| M5005_Spy_0149  | -        | NE | 162048 | 162326 | 92  | + | <a href="#">3572772</a> | COG3414G  | subunit IIB                                         | * |
| M5005_Spy_0150  | -        | NE | 162449 | 162934 | 161 | + | <a href="#">3572773</a> | COG1762GT | subunit IIA                                         | * |
| M5005_Spy_0151  | ulaD     | NE | 163025 | 163687 | 220 | + | <a href="#">3572774</a> | COG0269G  | 3-keto-L-gulonate-6-phosphate decarboxylase         | * |
| M5005_Spy_0152  | -        | NE | 163692 | 164555 | 287 | + | <a href="#">3572775</a> | COG3623G  | L-xylulose 5-phosphate 3-epimerase                  | * |
| M5005_Spy_0153  | araD     | NE | 164557 | 165261 | 234 | + | <a href="#">3572776</a> | COG0235G  | L-ribulose-5-phosphate 4-epimerase                  | * |
| M5005_Spy_0154  | -        | NC | 165319 | 165465 | 48  | + | <a href="#">3572777</a> | -         | hypothetical protein M5005_Spy_0154                 |   |
| M5005_Spy_0155  | -        | NE | 165586 | 167232 | 548 | + | <a href="#">3572778</a> | COG3711K  | BigG family transcription antiterminator            | * |
| M5005_Spy_0156  | -        | NE | 167485 | 168576 | 363 | + | <a href="#">3572779</a> | COG2220R  | L-ascorbate 6-phosphate lactonase                   | * |
| M5005_Spy_0157  | opuAA    | NE | 169064 | 170260 | 398 | + | <a href="#">3572741</a> | COG4175E  | glycine betaine transport ATP-binding protein       | * |
| M5005_Spy_0158  | opuABC   | NE | 170276 | 172003 | 575 | + | <a href="#">3572742</a> | COG4176E  | transporter permease                                | * |
| M5005_Spy_0159  | polA     | E  | 172134 | 174776 | 880 | + | <a href="#">3572743</a> | COG0749L  | DNA polymerase I                                    | * |
| M5005_Spy_0160  | -        | NE | 174963 | 175418 | 151 | + | <a href="#">3572744</a> | COG1832R  | CoA binding protein                                 | * |
| M5005_Spy_0161  | perR     | NE | 175470 | 175937 | 155 | + | <a href="#">3572745</a> | COG0735P  | ferric uptake regulation protein                    | * |
| M5005_Spy_0162  | vlg      | NE | 176094 | 176393 | 99  | + | <a href="#">3572746</a> | -         | trans-acting positive regulator Mry                 |   |
| M5005_Spy_0163  | -        | NE | 176615 | 177949 | 444 | + | <a href="#">3572747</a> | COG3969R  | sulfotransferase                                    |   |
| M5005_Spy_0164  | -        | NE | 177942 | 178472 | 176 | + | <a href="#">3572748</a> | COG1475K  | parB-like nuclease                                  |   |
| M5005_Spy_0165c | -        | NE | 178519 | 178761 | 80  | - | <a href="#">3572749</a> | COG3464L  | transposase                                         |   |
| M5005_Spy_0166c | -        | NE | 178801 | 179016 | 71  | - | <a href="#">3572750</a> | COG2801L  | transposase                                         |   |
| M5005_Spy_0167c | -        | NE | 179056 | 179625 | 189 | - | <a href="#">3572751</a> | COG2801L  | transposase                                         |   |
| M5005_Spy_0168c | -        | NE | 179658 | 179873 | 71  | - | <a href="#">3572752</a> | COG2963L  | transposase                                         |   |

|                 |        |    |        |        |     |   |                         |           |                                                  |  |   |
|-----------------|--------|----|--------|--------|-----|---|-------------------------|-----------|--------------------------------------------------|--|---|
| M5005_Spy_0169c | -      | NE | 180029 | 181339 | 436 | - | <a href="#">3572753</a> | COG0471P  | malonate permease                                |  | * |
| M5005_Spy_0170  | nadC   | NE | 181563 | 182435 | 290 | + | <a href="#">3572754</a> | COG0157H  | nicotinate-nucleotide pyrophosphorylase          |  | * |
| M5005_Spy_0171c | -      | NE | 182735 | 183541 | 268 | - | <a href="#">3572755</a> | COG2801L  | transposase                                      |  | * |
| M5005_Spy_0172c | -      | NE | 183562 | 184077 | 171 | - | <a href="#">3572756</a> | COG2963L  | transposase                                      |  | * |
| M5005_Spy_0173c | -      | NE | 184163 | 185026 | 287 | - | <a href="#">3572757</a> | COG5523S  | hypothetical protein M5005_Spy_0173              |  | * |
| M5005_Spy_0174  | -      | NC | 185063 | 185221 | 52  | + | <a href="#">3572758</a> | -         | hypothetical protein M5005_Spy_0174              |  | * |
| M5005_Spy_0175  | tgt    | NE | 185245 | 186387 | 380 | + | <a href="#">3572759</a> | COG0343J  | queuine tRNA-ribosyltransferase                  |  | * |
| M5005_Spy_0176  | -      | NE | 186604 | 186915 | 103 | + | <a href="#">3572760</a> | COG4357S  | hypothetical protein M5005_Spy_0176              |  | * |
| M5005_Spy_0177  | bioY   | NE | 186919 | 187458 | 179 | + | <a href="#">3572722</a> | COG1268R  | bioY protein                                     |  | * |
| M5005_Spy_0178  | -      | NE | 187598 | 188377 | 259 | + | <a href="#">3572723</a> | COG1234R  | metal-dependent hydrolase                        |  | * |
| M5005_Spy_0179  | -      | NE | 188377 | 188892 | 171 | + | <a href="#">3572724</a> | COG0590FJ | tRNA-specific adenosine deaminase                |  | * |
| M5005_Spy_0180c | -      | NE | 189506 | 190726 | 406 | - | <a href="#">3572725</a> | COG5279D  | S-layer protein                                  |  | * |
| M5005_Spy_0181  | -      | NC | 190780 | 190887 | 35  | + | <a href="#">3572726</a> | -         | hypothetical protein M5005_Spy_0181              |  | * |
| M5005_Spy_0182  | speG   | NE | 191138 | 191842 | 234 | + | <a href="#">3572727</a> | -         | exotoxin type G                                  |  | * |
| M5005_Spy_0183  | -      | NC | 191927 | 192046 | 39  | + | <a href="#">3572728</a> | -         | hypothetical protein M5005_Spy_0183              |  | * |
| M5005_Spy_0184  | -      | NC | 192082 | 192201 | 39  | + | <a href="#">3572729</a> | -         | hypothetical protein M5005_Spy_0184              |  | * |
| M5005_Spy_0185  | pgi    | E  | 192298 | 193647 | 449 | + | <a href="#">3572730</a> | COG0166G  | glucose-6-phosphate isomerase                    |  | * |
| M5005_Spy_0186c | ralp4  | NE | 193996 | 195504 | 502 | - | <a href="#">3572731</a> | -         | transcriptional regulator                        |  | * |
| M5005_Spy_0187  | -      | NE | 196059 | 196763 | 234 | + | <a href="#">3572732</a> | COG5433L  | transposase                                      |  | * |
| M5005_Spy_0188  | -      | NE | 196666 | 197181 | 171 | + | <a href="#">3572733</a> | -         | transposase                                      |  | * |
| M5005_Spy_0189  | -      | NC | 197165 | 197290 | 41  | + | <a href="#">3572734</a> | -         | hypothetical protein M5005_Spy_0189              |  | * |
| M5005_Spy_0190  | -      | NC | 197371 | 197478 | 35  | + | <a href="#">3572735</a> | -         | hypothetical protein M5005_Spy_0190              |  | * |
| M5005_Spy_0191  | -      | NE | 197506 | 198177 | 223 | + | <a href="#">3572736</a> | COG0705R  | rhomboid family integral membrane protein        |  | * |
| M5005_Spy_0192c | hasC.2 | NC | 198276 | 199175 | 299 | - | <a href="#">3572737</a> | COG1210M  | UTP-glucose-1-phosphate uridylyltransferase      |  | * |
| M5005_Spy_0194c | gpsA   | E  | 199408 | 200223 | 271 | - | <a href="#">3572739</a> | COG0240C  | glycerol-3-phosphate dehydrogenase, partial      |  | * |
| M5005_Spy_0195  | -      | NE | 200521 | 200970 | 149 | + | <a href="#">3572740</a> | COG1846K  | MarR family transcriptional regulator            |  | * |
| M5005_Spy_0196  | -      | NE | 200963 | 202669 | 568 | + | <a href="#">3572702</a> | COG1132V  | protein/permease                                 |  | * |
| M5005_Spy_0197  | -      | NE | 202672 | 204456 | 594 | + | <a href="#">3572703</a> | COG1132V  | protein/permease                                 |  | * |
| M5005_Spy_0198  | -      | NE | 204574 | 205341 | 255 | + | <a href="#">3572704</a> | COG1636S  | hypothetical protein M5005_Spy_0198              |  | * |
| M5005_Spy_0199  | dut    | NE | 205451 | 205897 | 148 | + | <a href="#">3572705</a> | COG0756F  | deoxyuridine 5'-triphosphate nucleotidohydrolase |  | * |
| M5005_Spy_0200  | radA   | NE | 205978 | 207339 | 453 | + | <a href="#">3572706</a> | COG1066O  | DNA repair protein RadA                          |  | * |
| M5005_Spy_0201  | -      | C  | 207528 | 208025 | 165 | + | <a href="#">3572707</a> | COG0288P  | carbonic anhydrase                               |  | * |
| M5005_Spy_0202  | -      | NE | 208156 | 208866 | 236 | + | <a href="#">3572708</a> | COG2013S  | hypothetical protein M5005_Spy_0202              |  | * |
| M5005_Spy_0203  | gltX   | E  | 209048 | 210493 | 481 | + | <a href="#">3572709</a> | COG0008J  | glutamyl-tRNA synthetase                         |  | * |
| M5005_Spy_0204  | fasB   | NE | 210888 | 212234 | 448 | + | <a href="#">3572710</a> | COG2972T  | sensory transduction protein kinase              |  | * |
| M5005_Spy_0205  | fasC   | NE | 212231 | 213514 | 427 | + | <a href="#">3572711</a> | COG2972T  | sensory transduction protein kinase              |  | * |
| M5005_Spy_0206  | fasA   | NE | 213518 | 214258 | 246 | + | <a href="#">3572712</a> | COG3279KT | response regulator                               |  | * |
| M5005_Spy_0207  | rnpA   | C  | 214798 | 215157 | 119 | + | <a href="#">3572713</a> | COG0594J  | ribonuclease P                                   |  | * |
| M5005_Spy_0208  | -      | NE | 215141 | 215950 | 269 | + | <a href="#">3572714</a> | COG0706U  | hypothetical protein M5005_Spy_0208              |  | * |
| M5005_Spy_0209  | -      | NE | 215962 | 216876 | 304 | + | <a href="#">3572715</a> | COG1847R  | jag protein                                      |  | * |
| M5005_Spy_0210  | -      | NC | 216961 | 217083 | 40  | + | <a href="#">3572716</a> | -         | hypothetical protein M5005_Spy_0210              |  | * |
| M5005_Spy_0211  | rpmH   | NC | 217191 | 217325 | 44  | + | <a href="#">3572717</a> | -         | 50S ribosomal protein L34                        |  | * |
| M5005_Spy_0212  | -      | NE | 217599 | 218303 | 234 | + | <a href="#">3572718</a> | COG3010G  | N-acetylmannosamine-6-phosphate 2-epimerase      |  | * |
| M5005_Spy_0213  | -      | NE | 218352 | 219671 | 439 | + | <a href="#">3572719</a> | COG1653G  | N-acetylneuraminate-binding protein              |  | * |
| M5005_Spy_0214  | -      | NE | 219774 | 220661 | 295 | + | <a href="#">3572720</a> | COG1175G  | N-acetylneuraminate transporter permease         |  | * |
| M5005_Spy_0215  | -      | NE | 220674 | 221504 | 276 | + | <a href="#">3572721</a> | COG0395G  | N-acetylneuraminate transporter permease         |  | * |
| M5005_Spy_0216  | -      | NE | 221661 | 222323 | 220 | + | <a href="#">3572683</a> | COG5578S  | hypothetical protein M5005_Spy_0216              |  | * |
| M5005_Spy_0217  | nanH   | NE | 222335 | 223249 | 304 | + | <a href="#">3572684</a> | COG0329EM | N-acetylneuraminate lyase                        |  | * |
| M5005_Spy_0218  | -      | NE | 223271 | 224209 | 312 | + | <a href="#">3572685</a> | COG1940KG | N-acetylmannosamine kinase                       |  | * |
| M5005_Spy_0219c | -      | NE | 224320 | 225150 | 276 | - | <a href="#">3572686</a> | COG1737K  | RpiR family transcriptional regulator            |  | * |
| M5005_Spy_0220  | tatD   | NE | 225402 | 226226 | 274 | + | <a href="#">3572687</a> | COG0084L  | sec-independent protein translocase              |  | * |
| M5005_Spy_0221  | -      | NE | 226198 | 226788 | 196 | + | <a href="#">3572688</a> | COG1658L  | ribonuclease M5                                  |  | * |
| M5005_Spy_0222  | ksgA   | NE | 226902 | 227774 | 290 | + | <a href="#">3572689</a> | COG0030J  | dimethyladenosine transferase                    |  | * |
| M5005_Spy_0223  | engC   | E  | 228198 | 229070 | 290 | + | <a href="#">3572690</a> | COG1162R  | ribosome-associated GTPase                       |  | * |
| M5005_Spy_0224  | rpe    | C  | 229080 | 229742 | 220 | + | <a href="#">3572691</a> | COG0036G  | ribose-phosphate 3-epimerase                     |  | * |
| M5005_Spy_0225  | -      | NE | 229735 | 230367 | 210 | + | <a href="#">3572692</a> | COG1564H  | thiamin pyrophosphokinase                        |  | * |
| M5005_Spy_0226  | -      | NE | 230369 | 231640 | 423 | + | <a href="#">3572693</a> | COG1322S  | rmuC family protein                              |  | * |
| M5005_Spy_0227  | cbf    | NE | 231630 | 232568 | 312 | + | <a href="#">3572694</a> | COG3481R  | CMP-binding factor                               |  | * |
| M5005_Spy_0228  | purR   | NE | 232835 | 233674 | 279 | + | <a href="#">3572695</a> | COG0503F  | pur operon repressor                             |  | * |

|                 |           |    |        |        |     |   |                         |            |                                                 |   |
|-----------------|-----------|----|--------|--------|-----|---|-------------------------|------------|-------------------------------------------------|---|
| M5005_Spy_0229  | prgA      | NE | 233665 | 236286 | 873 | + | <a href="#">3572696</a> | COG1196D   | surface exclusion protein                       | * |
| M5005_Spy_0230  | rpsL      | E  | 236494 | 236907 | 137 | + | <a href="#">3572697</a> | COG0048J   | 30S ribosomal protein S12                       | * |
| M5005_Spy_0231  | rpsG      | E  | 236928 | 237398 | 156 | + | <a href="#">3572698</a> | COG0049J   | 30S ribosomal protein S7                        | * |
| M5005_Spy_0232  | fus       | E  | 237765 | 239843 | 692 | + | <a href="#">3572699</a> | COG0480J   | elongation factor G                             | * |
| M5005_Spy_0233  | plr       | E  | 240191 | 241201 | 336 | + | <a href="#">3572700</a> | COG0057G   | glyceraldehyde-3-phosphate dehydrogenase        | * |
| M5005_Spy_0234c | -         | NC | 241427 | 241543 | 38  | - | <a href="#">3572701</a> | -          | hypothetical protein M5005_Spy_0234             | * |
| M5005_Spy_0235c | -         | E  | 241685 | 242425 | 246 | - | <a href="#">3572663</a> | COG1126E   | amino acid transport ATP-binding protein        | * |
| M5005_Spy_0236c | -         | E  | 242418 | 243986 | 522 | - | <a href="#">3572664</a> | COG0765E   | amino acid ABC transporter permease             | * |
| M5005_Spy_0237  | -         | NE | 244184 | 246082 | 632 | + | <a href="#">3572665</a> | COG4907S   | hypothetical protein M5005_Spy_0237             | * |
| M5005_Spy_0238  | uppP/bacA | NE | 246148 | 246987 | 279 | + | <a href="#">3572666</a> | COG1968V   | undecaprenyl pyrophosphate phosphatase          | * |
| M5005_Spy_0239  | mecA      | NE | 247133 | 247894 | 253 | + | <a href="#">3572667</a> | COG4862OTN | adaptor protein                                 | * |
| M5005_Spy_0240  | rgpG      | E  | 248045 | 249070 | 341 | + | <a href="#">3572668</a> | COG0472M   | acetylglucosaminophosphotransferase             | * |
| M5005_Spy_0241  | rgpG      | NC | 249040 | 249165 | 41  | + | <a href="#">3572669</a> | -          | hypothetical protein M5005_Spy_0241             | * |
| M5005_Spy_0242  | -         | C  | 249192 | 249962 | 256 | + | <a href="#">3572670</a> | COG0396O   | ABC transporter ATP-binding protein             | * |
| M5005_Spy_0243  | -         | C  | 250057 | 251319 | 420 | + | <a href="#">3572671</a> | COG0719O   | ABC transporter                                 | * |
| M5005_Spy_0244  | nifS3     | C  | 251350 | 252576 | 408 | + | <a href="#">3572672</a> | COG0520E   | cysteine desulfhydrase                          | * |
| M5005_Spy_0245  | nifU      | C  | 252563 | 253042 | 159 | + | <a href="#">3572673</a> | COG0822C   | iscU protein                                    | * |
| M5005_Spy_0246  | -         | C  | 253035 | 254453 | 472 | + | <a href="#">3572674</a> | COG0719O   | ABC transporter                                 | * |
| M5005_Spy_0247c | pbp7      | NE | 254605 | 255786 | 393 | - | <a href="#">3572675</a> | COG1686M   | D-alanyl-D-alanine carboxypeptidase             | * |
| M5005_Spy_0248c | dacA2     | NE | 255954 | 257186 | 410 | - | <a href="#">3572676</a> | COG1686M   | D-alanyl-D-alanine carboxypeptidase             | * |
| M5005_Spy_0249  | oppA      | NE | 257517 | 259487 | 656 | + | <a href="#">3572677</a> | COG4166E   | oligopeptide-binding protein                    | * |
| M5005_Spy_0250  | oppB      | NE | 259540 | 261054 | 504 | + | <a href="#">3572678</a> | COG0601EP  | oligopeptide transporter permease               | * |
| M5005_Spy_0251  | oppC      | NE | 261054 | 261980 | 308 | + | <a href="#">3572679</a> | COG1173EP  | oligopeptide transporter permease               | * |
| M5005_Spy_0252  | oppD      | NE | 261989 | 263059 | 356 | + | <a href="#">3572680</a> | COG0444EP  | oligopeptide transport ATP-binding protein      | * |
| M5005_Spy_0253  | oppF      | NE | 263052 | 263975 | 307 | + | <a href="#">3572681</a> | COG1123R   | oligopeptide transport ATP-binding protein      | * |
| M5005_Spy_0254c | -         | NC | 264216 | 264362 | 48  | - | <a href="#">3572682</a> | -          | transposase                                     | * |
| M5005_Spy_0255c | -         | NC | 264737 | 264871 | 44  | - | <a href="#">3572650</a> | -          | hypothetical protein M5005_Spy_0255             | * |
| M5005_Spy_0256  | comX1.1   | NE | 270293 | 270844 | 183 | + | <a href="#">3572657</a> | -          | competence-specific sigma factor                | * |
| M5005_Spy_0257  | -         | NE | 271455 | 272159 | 234 | + | <a href="#">3572658</a> | COG5433L   | transposase, partial                            | * |
| M5005_Spy_0258  | -         | NE | 272062 | 272577 | 171 | + | <a href="#">3572659</a> | -          | transposase                                     | * |
| M5005_Spy_0259  | -         | NC | 272561 | 272665 | 34  | + | <a href="#">3572660</a> | -          | hypothetical protein M5005_Spy_0259             | * |
| M5005_Spy_0260  | -         | E  | 272683 | 273267 | 194 | + | <a href="#">3572661</a> | COG2179R   | lipase                                          | * |
| M5005_Spy_0261  | -         | C  | 273267 | 274385 | 372 | + | <a href="#">3572662</a> | COG1161R   | GTP-binding protein YqeH                        | * |
| M5005_Spy_0262  | -         | NE | 274410 | 274718 | 102 | + | <a href="#">3572630</a> | COG1534J   | RNA-binding protein                             | * |
| M5005_Spy_0263  | nadD      | E  | 274787 | 275419 | 210 | + | <a href="#">3572631</a> | COG1057H   | nicotinic acid mononucleotide adenyltransferase | * |
| M5005_Spy_0264  | -         | NE | 275416 | 276009 | 197 | + | <a href="#">3572632</a> | COG1713H   | HAD superfamily hydrolase                       | * |
| M5005_Spy_0265  | -         | NE | 276009 | 276386 | 125 | + | <a href="#">3572633</a> | COG0799S   | iojap superfamily protein                       | * |
| M5005_Spy_0266  | -         | NE | 276428 | 277177 | 249 | + | <a href="#">3572634</a> | COG2226H   | methyltransferase                               | * |
| M5005_Spy_0267  | -         | NE | 277431 | 278537 | 368 | + | <a href="#">3572635</a> | COG1323R   | hypothetical protein M5005_Spy_0267             | * |
| M5005_Spy_0268  | -         | NC | 278874 | 279029 | 51  | + | <a href="#">3572636</a> | -          | hypothetical protein M5005_Spy_0268             | * |
| M5005_Spy_0269  | -         | NE | 279019 | 279735 | 238 | + | <a href="#">3572637</a> | COG0217S   | hypothetical protein M5005_Spy_0269             | * |
| M5005_Spy_0270  | atmA      | NE | 279938 | 280780 | 280 | + | <a href="#">3572638</a> | COG0834ET  | ABC transporter substrate-binding protein       | * |
| M5005_Spy_0271  | atmB      | NE | 281109 | 281954 | 281 | + | <a href="#">3572639</a> | COG1464P   | ABC transporter substrate-binding protein       | * |
| M5005_Spy_0272  | atmD      | NE | 282204 | 283268 | 354 | + | <a href="#">3572640</a> | COG1135P   | ABC transporter ATP-binding protein             | * |
| M5005_Spy_0273  | atmE      | NE | 283269 | 283961 | 230 | + | <a href="#">3572641</a> | COG2011P   | ABC transporter permease                        | * |
| M5005_Spy_0274c | braB      | NE | 284015 | 285385 | 456 | - | <a href="#">3572642</a> | COG1114E   | protein                                         | * |
| M5005_Spy_0275  | -         | NE | 285619 | 286833 | 404 | + | <a href="#">3572643</a> | COG3633E   | serine/threonine transporter SstT               | * |
| M5005_Spy_0276c | -         | C  | 286888 | 287562 | 224 | - | <a href="#">3572644</a> | COG0569P   | potassium uptake protein                        | * |
| M5005_Spy_0277c | -         | NE | 287572 | 288963 | 463 | - | <a href="#">3572645</a> | COG0168P   | potassium uptake protein                        | * |
| M5005_Spy_0278c | gidB      | NE | 289033 | 289746 | 237 | - | <a href="#">3572646</a> | COG0357M   | 16S rRNA methyltransferase GidB                 | * |
| M5005_Spy_0279  | lemA      | NE | 289896 | 290453 | 185 | + | <a href="#">3572647</a> | COG1704S   | hypothetical protein M5005_Spy_0279             | * |
| M5005_Spy_0280  | htpX      | NE | 290500 | 291396 | 298 | + | <a href="#">3572648</a> | COG0501O   | heat shock protein HtpX                         | * |
| M5005_Spy_0281  | -         | NE | 291630 | 292163 | 177 | + | <a href="#">3572649</a> | COG1399R   | hypothetical protein M5005_Spy_0281             | * |
| M5005_Spy_0282  | covR      | NE | 292430 | 293116 | 228 | + | <a href="#">3572611</a> | COG0745TK  | response regulator                              | * |
| M5005_Spy_0283  | covS      | NE | 293259 | 294623 | 454 | + | <a href="#">3572612</a> | COG0642T   | transmembrane histidine kinase                  | * |
| M5005_Spy_0284  | nrpR      | NE | 294838 | 295332 | 164 | + | <a href="#">3572613</a> | COG1327K   | NrdR family transcriptional regulator           | * |
| M5005_Spy_0285  | dnaB      | E  | 295316 | 296491 | 391 | + | <a href="#">3572614</a> | COG3611L   | replicative DNA helicase                        | * |
| M5005_Spy_0286  | dnaI      | E  | 296492 | 297394 | 300 | + | <a href="#">3572615</a> | COG1484L   | primosomal protein DnaI                         | * |
| M5005_Spy_0287  | engA      | E  | 297457 | 298767 | 436 | + | <a href="#">3572616</a> | COG1160R   | GTP-binding protein EngA                        | * |



|                 |      |    |        |        |      |   |                         |           |                                                       |  |   |
|-----------------|------|----|--------|--------|------|---|-------------------------|-----------|-------------------------------------------------------|--|---|
| M5005_Spy_0288  | snf  | NE | 298974 | 302072 | 1032 | + | <a href="#">3572617</a> | COG0553KL | SWF/SNF family helicase                               |  | * |
| M5005_Spy_0289  | -    | NE | 302315 | 302917 | 200  | + | <a href="#">3572618</a> | -         | hypothetical protein M5005_Spy_0289                   |  | * |
| M5005_Spy_0290  | murC | E  | 302957 | 304285 | 442  | + | <a href="#">3572619</a> | COG0773M  | UDP-N-acetylmuramate--L-alanine ligase                |  | * |
| M5005_Spy_0291  | -    | NE | 304331 | 304813 | 160  | + | <a href="#">3572620</a> | COG0456R  | acetyltransferase                                     |  | * |
| M5005_Spy_0292  | -    | C  | 304931 | 306499 | 522  | + | <a href="#">3572621</a> | COG1559R  | aminodeoxychorismate lyase                            |  | * |
| M5005_Spy_0293  | greA | NE | 306524 | 307054 | 176  | + | <a href="#">3572622</a> | COG0782K  | transcription elongation factor GreA                  |  | * |
| M5005_Spy_0294c | -    | NC | 307269 | 307412 | 47   | - | <a href="#">3572623</a> | -         | transposase                                           |  | * |
| M5005_Spy_0295c | oxaA | E  | 307677 | 308600 | 307  | - | <a href="#">3572624</a> | COG0706U  | OxaA-like protein precursor                           |  | * |
| M5005_Spy_0296c | -    | NE | 308682 | 308960 | 92   | - | <a href="#">3572625</a> | COG1254C  | acylphosphatase                                       |  | * |
| M5005_Spy_0297c | -    | NE | 309115 | 309630 | 171  | - | <a href="#">3572626</a> | -         | transposase                                           |  | * |
| M5005_Spy_0298c | -    | NE | 309533 | 310237 | 234  | - | <a href="#">3572627</a> | COG5433L  | transposase                                           |  | * |
| M5005_Spy_0299  | -    | NE | 310535 | 311272 | 245  | + | <a href="#">3572628</a> | COG0566J  | 23S rRNA methyltransferase                            |  | * |
| M5005_Spy_0300  | -    | NE | 311311 | 311811 | 166  | + | <a href="#">3572629</a> | COG1418R  | HAD superfamily hydrolase                             |  | * |
| M5005_Spy_0301  | -    | NE | 311826 | 312515 | 229  | + | <a href="#">3572591</a> | COG0670R  | hypothetical protein M5005_Spy_0301                   |  | * |
| M5005_Spy_0302  | -    | C  | 312693 | 312935 | 80   | + | <a href="#">3572592</a> | COG3763S  | hypothetical protein M5005_Spy_0302                   |  | * |
| M5005_Spy_0303  | glr  | E  | 313113 | 313907 | 264  | + | <a href="#">3572593</a> | COG0796M  | glutamate racemase                                    |  | * |
| M5005_Spy_0304  | -    | NE | 313904 | 314890 | 328  | + | <a href="#">3572594</a> | COG0127F  | pyrophosphatase/unknown domain fusion protein         |  | * |
| M5005_Spy_0305  | -    | NE | 314869 | 315390 | 173  | + | <a href="#">3572595</a> | COG0622R  | phosphoesterase                                       |  | * |
| M5005_Spy_0306  | -    | NE | 315387 | 315848 | 153  | + | <a href="#">3572596</a> | COG4109K  | hypothetical protein M5005_Spy_0306                   |  | * |
| M5005_Spy_0307  | xerD | NE | 315845 | 316591 | 248  | + | <a href="#">3572597</a> | COG4974L  | site-specific tyrosine recombinase XerD               |  | * |
| M5005_Spy_0308  | scpA | NE | 316591 | 317292 | 233  | + | <a href="#">3572598</a> | COG1354S  | segregation and condensation protein A                |  | * |
| M5005_Spy_0309  | scpB | NE | 317289 | 317840 | 183  | + | <a href="#">3572599</a> | COG1386K  | segregation and condensation protein B                |  | * |
| M5005_Spy_0310  | rluB | NE | 317939 | 318685 | 248  | + | <a href="#">3572600</a> | COG1187J  | ribosomal large subunit pseudouridine synthase B      |  | * |
| M5005_Spy_0311  | -    | NE | 318682 | 318945 | 87   | + | <a href="#">3572601</a> | COG0759S  | hypothetical protein M5005_Spy_0311                   |  | * |
| M5005_Spy_0312  | -    | NE | 319123 | 319671 | 182  | + | <a href="#">3572602</a> | COG0219J  | 23S rRNA methyltransferase                            |  | * |
| M5005_Spy_0313  | -    | C  | 319982 | 320545 | 187  | + | <a href="#">3572603</a> | COG3601S  | riboflavin transporter                                |  | * |
| M5005_Spy_0314  | -    | NE | 320547 | 321200 | 217  | + | <a href="#">3572604</a> | COG0671I  | phosphatidylglycerophosphatase B                      |  | * |
| M5005_Spy_0315  | -    | NE | 321493 | 322413 | 306  | + | <a href="#">3572605</a> | COG1242R  | Fe-S oxidoreductase                                   |  | * |
| M5005_Spy_0316  | -    | NE | 322452 | 323006 | 184  | + | <a href="#">3572606</a> | COG0144J  | SAM-dependent methyltransferase                       |  | * |
| M5005_Spy_0317  | hlyX | NE | 323139 | 324473 | 444  | + | <a href="#">3572607</a> | COG1253R  | hemolysin                                             |  | * |
| M5005_Spy_0318  | pflC | NE | 324479 | 325342 | 287  | + | <a href="#">3572608</a> | COG1180O  | pyruvate formate-lyase activating enzyme              |  | * |
| M5005_Spy_0319  | ppaC | NC | 325473 | 326408 | 311  | + | <a href="#">3572609</a> | COG1227C  | manganese-dependent inorganic pyrophosphatase         |  | * |
| M5005_Spy_0320  | -    | NE | 326484 | 327137 | 217  | + | <a href="#">3572610</a> | -         | hypothetical protein M5005_Spy_0320                   |  | * |
| M5005_Spy_0321c | fhuG | NE | 327182 | 328108 | 308  | - | <a href="#">3572572</a> | COG0609P  | ferrichrome transporter permease                      |  | * |
| M5005_Spy_0322c | fhuB | NE | 328180 | 329232 | 350  | - | <a href="#">3572573</a> | COG0609P  | ferrichrome transporter permease                      |  | * |
| M5005_Spy_0323c | fhuD | NE | 329222 | 330154 | 310  | - | <a href="#">3572574</a> | COG0614P  | ferrichrome-binding protein                           |  | * |
| M5005_Spy_0324c | fhuA | NE | 330180 | 330962 | 260  | - | <a href="#">3572575</a> | COG1120PH | ferrichrome ABC transporter ATP-binding protein       |  | * |
| M5005_Spy_0325c | murE | E  | 331208 | 332653 | 481  | - | <a href="#">3572576</a> | COG0769M  | ligase                                                |  | * |
| M5005_Spy_0326  | -    | E  | 332741 | 334375 | 544  | + | <a href="#">3572577</a> | COG2244R  | export protein for polysaccharides and teichoic acids |  | * |
| M5005_Spy_0327  | upp  | NE | 334543 | 335172 | 209  | + | <a href="#">3572578</a> | COG0035F  | uracil phosphoribosyltransferase                      |  | * |
| M5005_Spy_0328  | clpP | C  | 335396 | 335986 | 196  | + | <a href="#">3572579</a> | COG07400U | ATP-dependent Clp protease proteolytic subunit        |  | * |
| M5005_Spy_0329  | -    | NE | 336478 | 336753 | 91   | + | <a href="#">3572580</a> | COG4471S  | hypothetical protein M5005_Spy_0329                   |  | * |
| M5005_Spy_0330  | tmk  | E  | 337002 | 337637 | 211  | + | <a href="#">3572581</a> | COG0125F  | thymidylate kinase                                    |  | * |
| M5005_Spy_0331  | dnaX | E  | 337655 | 338530 | 291  | + | <a href="#">3572582</a> | COG0470L  | DNA polymerase III subunit delta'                     |  | * |
| M5005_Spy_0332  | -    | NE | 338549 | 338788 | 79   | + | <a href="#">3572583</a> | -         | tpl protein                                           |  | * |
| M5005_Spy_0333  | -    | NC | 338877 | 339038 | 53   | + | <a href="#">3572584</a> | COG1774S  | signal peptidase-like protein                         |  | * |
| M5005_Spy_0334  | -    | NC | 339193 | 339516 | 107  | + | <a href="#">3572585</a> | COG4467S  | DNA replication initiation control protein YabA       |  | * |
| M5005_Spy_0335  | -    | NE | 339521 | 340384 | 287  | + | <a href="#">3572586</a> | COG0313R  | corrin/porphyrin methyltransferase                    |  | * |
| M5005_Spy_0336  | -    | NE | 340411 | 340803 | 130  | + | <a href="#">3572587</a> | -         | hypothetical protein M5005_Spy_0336                   |  | * |
| M5005_Spy_0337c | cutC | NE | 340850 | 341479 | 209  | - | <a href="#">3572588</a> | COG3142P  | copper homeostasis protein                            |  | * |
| M5005_Spy_0338  | -    | NE | 341778 | 342134 | 118  | + | <a href="#">3572589</a> | COG1393P  | arsenate reductase                                    |  | * |
| M5005_Spy_0339c | exoA | NC | 342208 | 343119 | 303  | - | <a href="#">3572590</a> | COG0708L  | exodeoxyribonuclease III                              |  | * |
| M5005_Spy_0340  | lctO | NE | 343269 | 344450 | 393  | + | <a href="#">3572552</a> | COG1304C  | L-lactate oxidase                                     |  | * |
| M5005_Spy_0341  | prtS | NE | 344713 | 349656 | 1647 | + | <a href="#">3572553</a> | COG1404O  | lactocepin                                            |  | * |
| M5005_Spy_0343  | -    | NE | 350145 | 350324 | 59   | + | <a href="#">3572554</a> | -         | hypothetical protein M5005_Spy_0343                   |  | * |
| M5005_Spy_0344  | -    | NE | 350427 | 351134 | 235  | + | <a href="#">3572555</a> | COG3619S  | permease                                              |  | * |
| M5005_Spy_0345  | metG | E  | 351377 | 353374 | 665  | + | <a href="#">3572556</a> | COG0143J  | methionyl-tRNA synthetase                             |  | * |
| M5005_Spy_0346  | -    | NC | 353705 | 353872 | 55   | + | <a href="#">3572557</a> | -         | hypothetical protein M5005_Spy_0346                   |  | * |
| M5005_Spy_0347  | nrdF | NE | 353869 | 354882 | 337  | + | <a href="#">3572558</a> | COG0208F  | ribonucleotide-diphosphate reductase subunit beta     |  | * |

|                 |        |    |        |        |     |   |                         |            |                                                    |  |   |
|-----------------|--------|----|--------|--------|-----|---|-------------------------|------------|----------------------------------------------------|--|---|
| M5005_Spy_0348  | nrdI   | NE | 354886 | 355374 | 162 | + | <a href="#">3572559</a> | COG1780F   | ribonucleotide reductase stimulatory protein       |  | * |
| M5005_Spy_0349  | nrdE.1 | NE | 355341 | 357521 | 726 | + | <a href="#">3572560</a> | COG0209F   | ribonucleotide-diphosphate reductase subunit alpha |  | * |
| M5005_Spy_0350  | -      | NC | 357500 | 357718 | 72  | + | <a href="#">3572561</a> | -          | hypothetical protein M5005_Spy_0350                |  |   |
| M5005_Spy_0351c | spyA   | NE | 357724 | 358476 | 250 | - | <a href="#">3572562</a> | COG5585T   | C3 family ADP-ribosyltransferase                   |  | * |
| M5005_Spy_0352  | -      | NE | 358935 | 359471 | 178 | + | <a href="#">3572563</a> | -          | hypothetical protein M5005_Spy_0352                |  |   |
| M5005_Spy_0353  | -      | NE | 359613 | 359996 | 127 | + | <a href="#">3572564</a> | -          | hypothetical protein M5005_Spy_0353                |  |   |
| M5005_Spy_0354c | -      | NE | 360090 | 360722 | 210 | - | <a href="#">3572565</a> | -          | hypothetical protein M5005_Spy_0354                |  |   |
| M5005_Spy_0355  | -      | NE | 361401 | 361721 | 106 | + | <a href="#">3572566</a> | -          | hypothetical protein M5005_Spy_0355                |  |   |
| M5005_Spy_0356c | speJ   | NE | 362034 | 362732 | 232 | - | <a href="#">3572567</a> | -          | exotoxin type J                                    |  |   |
| M5005_Spy_0357c | -      | NE | 362980 | 363594 | 204 | - | <a href="#">3572568</a> | -          | hypothetical protein M5005_Spy_0357                |  |   |
| M5005_Spy_0358  | -      | NE | 363955 | 364191 | 78  | + | <a href="#">3572569</a> | -          | hypothetical protein M5005_Spy_0358                |  |   |
| M5005_Spy_0359  | fabG   | NE | 364175 | 364882 | 235 | + | <a href="#">3572570</a> | COG1028IQR | 3-ketoacyl-ACP reductase                           |  | * |
| M5005_Spy_0360  | -      | NE | 364928 | 365917 | 329 | + | <a href="#">3572571</a> | COG0673R   | NAD-dependent oxidoreductase                       |  | * |
| M5005_Spy_0361  | glpT   | NE | 366250 | 367587 | 445 | + | <a href="#">3572533</a> | COG2271G   | phosphoglycerate transporter protein               |  | * |
| M5005_Spy_0362  | glmU   | E  | 367760 | 369142 | 460 | + | <a href="#">3572534</a> | COG1207M   | uridyltransferase/glucosamine-1-phosphate          |  | * |
| M5005_Spy_0363  | -      | NE | 369173 | 369727 | 184 | + | <a href="#">3572535</a> | COG0494LR  | phosphohydrolase                                   |  | * |
| M5005_Spy_0364  | -      | NC | 369727 | 369978 | 83  | + | <a href="#">3572536</a> | -          | hypothetical protein M5005_Spy_0364                |  |   |
| M5005_Spy_0365  | pfs    | E  | 369998 | 370693 | 231 | + | <a href="#">3572537</a> | COG0775F   | nucleosidase                                       |  | * |
| M5005_Spy_0366  | -      | NE | 370844 | 371185 | 113 | - | <a href="#">3572538</a> | -          | hypothetical protein M5005_Spy_0366                |  |   |
| M5005_Spy_0367c | mtsR   | NC | 371286 | 371933 | 215 | - | <a href="#">3572539</a> | COG1321K   | iron-dependent repressor                           |  | * |
| M5005_Spy_0368  | mtsA   | NE | 372091 | 373011 | 306 | + | <a href="#">3572540</a> | COG0803P   | manganese-binding protein                          |  | * |
| M5005_Spy_0369  | mtsB   | NE | 373075 | 373800 | 241 | + | <a href="#">3572541</a> | COG1121P   | manganese transporter ATP-binding protein          |  | * |
| M5005_Spy_0370  | mtsC   | NE | 373801 | 374655 | 284 | + | <a href="#">3572542</a> | COG1108P   | manganese transporter membrane protein             |  | * |
| M5005_Spy_0371c | cypB   | NE | 374803 | 375609 | 268 | - | <a href="#">3572543</a> | COG0652O   | peptidyl-prolyl cis-trans isomerase                |  | * |
| M5005_Spy_0372  | ftsK   | E  | 375826 | 378231 | 801 | + | <a href="#">3572544</a> | COG1674D   | cell division protein                              |  | * |
| M5005_Spy_0373c | -      | NE | 378301 | 378654 | 117 | - | <a href="#">3572545</a> | -          | hypothetical protein M5005_Spy_0373                |  |   |
| M5005_Spy_0374  | rplK   | NC | 378898 | 379323 | 141 | + | <a href="#">3572546</a> | COG0080J   | 50S ribosomal protein L11                          |  | * |
| M5005_Spy_0375  | rplA   | E  | 379429 | 380118 | 229 | + | <a href="#">3572547</a> | COG0081J   | 50S ribosomal protein L1                           |  | * |
| M5005_Spy_0376  | -      | NE | 380469 | 381602 | 377 | + | <a href="#">3572548</a> | COG5433L   | transposase                                        |  | * |
| M5005_Spy_0377  | pyrH   | E  | 381767 | 381937 | 56  | + | <a href="#">3572549</a> | COG0528F   | uridylate kinase                                   |  | * |
| M5005_Spy_0380  | frr    | E  | 382524 | 383081 | 185 | + | <a href="#">3572513</a> | COG0233J   | ribosome recycling factor                          |  | * |
| M5005_Spy_0381  | -      | NE | 383190 | 384047 | 285 | + | <a href="#">3572514</a> | COG2996S   | S1 RNA-binding domain-containing protein           |  | * |
| M5005_Spy_0382  | msrA.2 | NE | 384120 | 384629 | 169 | + | <a href="#">3572515</a> | COG0225O   | methionine sulfoxide reductase A                   |  | * |
| M5005_Spy_0383  | -      | NE | 384626 | 384841 | 71  | + | <a href="#">3572516</a> | COG4479S   | hypothetical protein M5005_Spy_0383                |  |   |
| M5005_Spy_0384  | -      | NE | 384997 | 386166 | 389 | + | <a href="#">3572517</a> | -          | surface antigen                                    |  | * |
| M5005_Spy_0385  | -      | NE | 386441 | 388252 | 603 | + | <a href="#">3572518</a> | COG4716S   | hypothetical protein M5005_Spy_0385                |  |   |
| M5005_Spy_0386  | phoH   | NE | 388411 | 389463 | 350 | + | <a href="#">3572519</a> | COG1702T   | phoH protein                                       |  | * |
| M5005_Spy_0387  | -      | NE | 389509 | 390084 | 191 | + | <a href="#">3572520</a> | COG1573L   | uracil DNA glycosylase                             |  | * |
| M5005_Spy_0388  | -      | E  | 390192 | 390740 | 182 | + | <a href="#">3572521</a> | COG0319R   | metalloprotease                                    |  | * |
| M5005_Spy_0389  | dgk    | E  | 390721 | 391128 | 135 | + | <a href="#">3572522</a> | COG0818M   | diacylglycerol kinase                              |  | * |
| M5005_Spy_0390  | era    | C  | 391248 | 392144 | 298 | + | <a href="#">3572523</a> | COG1159R   | GTP-binding protein Era                            |  | * |
| M5005_Spy_0391  | -      | NE | 392128 | 392640 | 170 | + | <a href="#">3572524</a> | COG1051F   | phosphohydrolase                                   |  | * |
| M5005_Spy_0392c | -      | NE | 392945 | 393199 | 84  | - | <a href="#">3572525</a> | -          | hypothetical protein M5005_Spy_0392                |  |   |
| M5005_Spy_0393  | -      | NE | 393597 | 393842 | 81  | + | <a href="#">3572526</a> | -          | hypothetical protein M5005_Spy_0393                |  |   |
| M5005_Spy_0394  | -      | NE | 393857 | 394039 | 60  | + | <a href="#">3572527</a> | -          | hypothetical protein M5005_Spy_0394                |  |   |
| M5005_Spy_0395c | -      | NE | 394230 | 394409 | 59  | - | <a href="#">3572528</a> | -          | transposase                                        |  |   |
| M5005_Spy_0396c | -      | NC | 394348 | 394497 | 49  | - | <a href="#">3572529</a> | COG3328L   | transposase                                        |  |   |
| M5005_Spy_0397c | -      | NE | 394494 | 394916 | 140 | - | <a href="#">3572530</a> | COG3328L   | transposase                                        |  |   |
| M5005_Spy_0398  | -      | NE | 395189 | 395398 | 69  | + | <a href="#">3572531</a> | -          | bacteriocin                                        |  |   |
| M5005_Spy_0399  | -      | NE | 395463 | 395663 | 66  | + | <a href="#">3572532</a> | -          | hypothetical protein M5005_Spy_0399                |  |   |
| M5005_Spy_0400  | silD   | NE | 395957 | 396151 | 64  | + | <a href="#">3572494</a> | -          | hypothetical protein M5005_Spy_0400                |  |   |
| M5005_Spy_0401c | -      | NC | 396344 | 396460 | 38  | - | <a href="#">3572495</a> | -          | hypothetical protein M5005_Spy_0401                |  |   |
| M5005_Spy_0402  | -      | NE | 396644 | 397639 | 331 | + | <a href="#">3572496</a> | -          | hypothetical protein M5005_Spy_0402                |  |   |
| M5005_Spy_0403  | -      | NE | 397684 | 398130 | 148 | + | <a href="#">3572497</a> | -          | hypothetical protein M5005_Spy_0403                |  |   |
| M5005_Spy_0404c | -      | NE | 398478 | 398747 | 89  | - | <a href="#">3572498</a> | -          | hypothetical protein M5005_Spy_0404                |  |   |
| M5005_Spy_0405  | -      | NC | 398948 | 399055 | 35  | + | <a href="#">3572499</a> | -          | hypothetical protein M5005_Spy_0405                |  |   |
| M5005_Spy_0406c | -      | NE | 399269 | 399511 | 80  | - | <a href="#">3572500</a> | -          | hypothetical protein M5005_Spy_0406                |  |   |
| M5005_Spy_0407  | mutR   | NE | 399818 | 400684 | 288 | + | <a href="#">3572501</a> | -          | transcriptional regulator                          |  | * |
| M5005_Spy_0408  | fpg    | NE | 400856 | 401683 | 275 | + | <a href="#">3572502</a> | COG0266L   | formamidopyrimidine-DNA glycosylase                |  | * |

|                 |            |    |        |        |      |   |                         |           |                                                |   |
|-----------------|------------|----|--------|--------|------|---|-------------------------|-----------|------------------------------------------------|---|
| M5005_Spy_0409  | coaE       | E  | 401593 | 402273 | 226  | + | <a href="#">3572503</a> | COG0237H  | dephospho-CoA kinase                           | * |
| M5005_Spy_0410  | -          | NE | 402463 | 403965 | 500  | + | <a href="#">3572504</a> | COG0433R  | ATPase                                         | * |
| M5005_Spy_0411  | -          | NE | 404087 | 405280 | 397  | + | <a href="#">3572505</a> | COG2814G  | multidrug resistance protein B                 | * |
| M5005_Spy_0412  | rpmG       | NC | 405277 | 405423 | 48   | + | <a href="#">3572506</a> | COG0267J  | 50S ribosomal protein L33                      | * |
| M5005_Spy_0413  | secG       | E  | 405469 | 405705 | 78   | + | <a href="#">3572507</a> | COG1314U  | preprotein translocase subunit SecG            | * |
| M5005_Spy_0414  | -          | NE | 405802 | 408132 | 776  | + | <a href="#">3572508</a> | COG0557K  | exoribonuclease II                             | * |
| M5005_Spy_0415  | smpB       | NC | 408135 | 408602 | 155  | + | <a href="#">3572509</a> | COG0691O  | SsrA-binding protein                           | * |
| M5005_Spy_0416  | -          | NE | 408617 | 409327 | 236  | + | <a href="#">3572510</a> | COG3823O  | glutaminyl-peptide cyclotransferase            | * |
| M5005_Spy_0417c | pcp        | NE | 409443 | 410090 | 215  | - | <a href="#">3572511</a> | COG2039O  | pyrrolidone-carboxylate peptidase              | * |
| M5005_Spy_0418c | -          | NE | 410140 | 411066 | 308  | - | <a href="#">3572512</a> | COG3817S  | permease                                       | * |
| M5005_Spy_0419c | -          | NE | 411066 | 411749 | 227  | - | <a href="#">3572474</a> | COG3819S  | permease                                       | * |
| M5005_Spy_0420c | -          | NE | 411960 | 412886 | 308  | - | <a href="#">3572475</a> | COG0463M  | glucosyltransferase                            | * |
| M5005_Spy_0421c | gloA       | NE | 413031 | 413408 | 125  | - | <a href="#">3572476</a> | COG0346E  | lactoylglutathione lyase                       | * |
| M5005_Spy_0422c | -          | NE | 413419 | 414084 | 221  | - | <a href="#">3572477</a> | COG0778C  | NAD(P)H-dependent quinone reductase            | * |
| M5005_Spy_0423c | pepQ       | NE | 414133 | 415218 | 361  | - | <a href="#">3572478</a> | COG0006E  | Xaa-Pro dipeptidase                            | * |
| M5005_Spy_0424  | ccpA       | NC | 415392 | 416393 | 333  | + | <a href="#">3572479</a> | COG1609K  | catabolite control protein A                   | * |
| M5005_Spy_0425  | -          | C  | 416524 | 417522 | 332  | + | <a href="#">3572480</a> | COG0438M  | glycosyltransferase                            | * |
| M5005_Spy_0426  | -          | E  | 417524 | 418858 | 444  | + | <a href="#">3572481</a> | COG0438M  | 1,2-diacylglycerol 3-glucosyltransferase       | * |
| M5005_Spy_0427  | thrS       | E  | 419280 | 421223 | 647  | + | <a href="#">3572482</a> | COG0441J  | threonyl-tRNA synthetase                       | * |
| M5005_Spy_0428  | drrrA/tagH | NE | 421364 | 422356 | 330  | + | <a href="#">3572483</a> | COG4586R  | daunorubicin resistance ATP-binding protein    | * |
| M5005_Spy_0429  | -          | NE | 422358 | 423176 | 272  | + | <a href="#">3572484</a> | COG4587R  | daunorubicin resistance transmembrane protein  | * |
| M5005_Spy_0430  | -          | NE | 423178 | 423963 | 261  | + | <a href="#">3572485</a> | COG3694R  | ABC transporter permease                       | * |
| M5005_Spy_0431  | -          | NC | 424164 | 424313 | 49   | + | <a href="#">3572486</a> | -         | dihydroxyacetone kinase                        | * |
| M5005_Spy_0432  | -          | NE | 424708 | 425856 | 382  | + | <a href="#">3572487</a> | COG0183I  | acetyl-CoA acetyltransferase                   | * |
| M5005_Spy_0433  | -          | NE | 425813 | 427060 | 415  | + | <a href="#">3572488</a> | COG0318IQ | long-chain-fatty-acid--CoA ligase              | * |
| M5005_Spy_0434  | -          | NE | 427116 | 428150 | 344  | + | <a href="#">3572489</a> | -         | hypothetical protein M5005_Spy_0434            | * |
| M5005_Spy_0435  | vicR       | E  | 428312 | 429022 | 236  | + | <a href="#">3572490</a> | COG0745TK | two-component response regulator               | * |
| M5005_Spy_0436  | vicK       | NE | 429015 | 430367 | 450  | + | <a href="#">3572491</a> | COG5002T  | two-component sensor histidine kinase          | * |
| M5005_Spy_0437  | vicX       | NE | 430371 | 431180 | 269  | + | <a href="#">3572492</a> | COG1235R  | Zn-dependent hydrolase                         | * |
| M5005_Spy_0438  | rnc        | C  | 431624 | 432316 | 230  | + | <a href="#">3572493</a> | COG0571K  | ribonuclease III                               | * |
| M5005_Spy_0439  | smc        | NE | 432317 | 435856 | 1179 | + | <a href="#">3572455</a> | COG1196D  | chromosome partition protein                   | * |
| M5005_Spy_0440c | -          | NE | 436109 | 436960 | 283  | - | <a href="#">3572456</a> | -         | transcriptional regulator                      | * |
| M5005_Spy_0441  | aroE       | NE | 437234 | 438106 | 290  | + | <a href="#">3572457</a> | COG0169E  | shikimate 5-dehydrogenase                      | * |
| M5005_Spy_0442  | -          | NE | 438205 | 438939 | 244  | + | <a href="#">3572458</a> | COG1082G  | hypothetical protein M5005_Spy_0442            | * |
| M5005_Spy_0443  | -          | NE | 438941 | 439675 | 244  | + | <a href="#">3572459</a> | COG1478S  | hypothetical protein M5005_Spy_0443            | * |
| M5005_Spy_0444  | -          | NE | 439668 | 440654 | 328  | + | <a href="#">3572460</a> | COG0673R  | hypothetical protein M5005_Spy_0444            | * |
| M5005_Spy_0445  | metK1      | NE | 440664 | 441863 | 399  | + | <a href="#">3572461</a> | COG1812E  | S-adenosylmethionine synthetase                | * |
| M5005_Spy_0446  | -          | NE | 441847 | 442815 | 322  | + | <a href="#">3572462</a> | COG1493T  | hypothetical protein M5005_Spy_0446            | * |
| M5005_Spy_0447  | -          | NE | 442870 | 443859 | 329  | + | <a href="#">3572463</a> | COG0463M  | cell wall biosynthesis glucosyltransferase     | * |
| M5005_Spy_0448  | -          | NC | 444385 | 444528 | 47   | + | <a href="#">3572464</a> | -         | hypothetical protein M5005_Spy_0448            | * |
| M5005_Spy_0449  | hasB.2     | NE | 444552 | 445709 | 385  | + | <a href="#">3572465</a> | COG1004M  | UDP-glucose 6-dehydrogenase                    | * |
| M5005_Spy_0450  | mefE       | NE | 445794 | 447002 | 402  | + | <a href="#">3572466</a> | COG2270R  | macrolide-efflux protein                       | * |
| M5005_Spy_0451c | -          | NE | 447105 | 447314 | 69   | - | <a href="#">3572467</a> | COG3655K  | transcriptional regulator                      | * |
| M5005_Spy_0452c | -          | NE | 447304 | 448149 | 281  | - | <a href="#">3572468</a> | -         | chromosome segregation ATPase                  | * |
| M5005_Spy_0453c | -          | NE | 448234 | 448962 | 242  | - | <a href="#">3572469</a> | -         | chromosome segregation ATPase                  | * |
| M5005_Spy_0454c | -          | NE | 448953 | 449177 | 74   | - | <a href="#">3572470</a> | -         | hypothetical protein M5005_Spy_0454            | * |
| M5005_Spy_0455c | -          | NE | 449177 | 450271 | 364  | - | <a href="#">3572471</a> | -         | hypothetical protein M5005_Spy_0455            | * |
| M5005_Spy_0456  | -          | NC | 450317 | 450619 | 100  | + | <a href="#">3572472</a> | COG3077L  | plasmid stabilization system antitoxin protein | * |
| M5005_Spy_0457  | -          | NE | 450619 | 450924 | 101  | + | <a href="#">3572473</a> | COG3668R  | plasmid stabilization system protein           | * |
| M5005_Spy_0458  | -          | NE | 450943 | 451215 | 90   | + | <a href="#">3572435</a> | -         | hypothetical protein M5005_Spy_0458            | * |
| M5005_Spy_0459  | -          | NE | 451320 | 451772 | 150  | + | <a href="#">3572436</a> | COG4695S  | portal protein                                 | * |
| M5005_Spy_0460  | -          | NE | 451838 | 452152 | 104  | + | <a href="#">3572437</a> | -         | hypothetical protein M5005_Spy_0460            | * |
| M5005_Spy_0461  | -          | NE | 452569 | 452907 | 112  | + | <a href="#">3572438</a> | COG3177S  | hypothetical protein M5005_Spy_0461            | * |
| M5005_Spy_0462  | -          | NE | 452931 | 453755 | 274  | + | <a href="#">3572439</a> | COG0017J  | asparagine synthetase A                        | * |
| M5005_Spy_0463  | -          | NE | 453769 | 455016 | 415  | + | <a href="#">3572440</a> | COG0439I  | hypothetical protein M5005_Spy_0463            | * |
| M5005_Spy_0464  | mccF       | NE | 455244 | 455960 | 238  | + | <a href="#">3572441</a> | COG1619V  | microcin C7 self-immunity protein              | * |
| M5005_Spy_0465  | -          | NE | 455973 | 456173 | 66   | + | <a href="#">3572442</a> | -         | hypothetical protein M5005_Spy_0465            | * |
| M5005_Spy_0466  | -          | NE | 456293 | 457192 | 299  | + | <a href="#">3572443</a> | COG0124J  | hypothetical protein M5005_Spy_0466            | * |
| M5005_Spy_0467c | -          | NE | 457645 | 458358 | 237  | - | <a href="#">3572444</a> | COG2801L  | transposase                                    | * |



|                 |           |    |        |        |     |   |                         |            |                                             |   |
|-----------------|-----------|----|--------|--------|-----|---|-------------------------|------------|---------------------------------------------|---|
| M5005_Spy_0468c | -         | NE | 458406 | 458681 | 91  | - | <a href="#">3572445</a> | COG2963L   | transposase                                 |   |
| M5005_Spy_0469  | -         | NE | 458701 | 458919 | 72  | + | <a href="#">3572446</a> | -          | hypothetical protein M5005_Spy_0469         |   |
| M5005_Spy_0470  | -         | NE | 458986 | 459783 | 265 | + | <a href="#">3572447</a> | COG0561R   | HAD superfamily hydrolase                   | * |
| M5005_Spy_0471  | -         | NE | 459787 | 460611 | 274 | + | <a href="#">3572448</a> | COG0561R   | HAD superfamily hydrolase                   | * |
| M5005_Spy_0472  | ftsY      | E  | 460611 | 462161 | 516 | + | <a href="#">3572449</a> | COG0552U   | cell division protein                       | * |
| M5005_Spy_0473c | -         | NE | 462215 | 463582 | 455 | - | <a href="#">3572450</a> | COG2814G   | multidrug resistance protein B              | * |
| M5005_Spy_0474  | licT/bglG | NE | 463910 | 464752 | 280 | + | <a href="#">3572451</a> | COG3711K   | BigG family transcription antiterminator    | * |
| M5005_Spy_0475  | -         | NE | 464916 | 466616 | 566 | + | <a href="#">3572452</a> | COG1263G   | subunit IIABC                               | * |
| M5005_Spy_0476  | bglA      | NE | 466635 | 468059 | 474 | + | <a href="#">3572453</a> | COG2723G   | 6-phospho-beta-glucosidase                  | * |
| M5005_Spy_0477c | -         | NE | 468158 | 468973 | 271 | - | <a href="#">3572454</a> | COG3689S   | hypothetical protein M5005_Spy_0477         | * |
| M5005_Spy_0478c | -         | NE | 468973 | 469875 | 300 | - | <a href="#">3572416</a> | COG0701R   | hypothetical protein M5005_Spy_0478         | * |
| M5005_Spy_0479  | -         | NE | 470009 | 470206 | 65  | + | <a href="#">3572417</a> | -          | hypothetical protein M5005_Spy_0479         |   |
| M5005_Spy_0480  | -         | NE | 470304 | 470432 | 42  | - | <a href="#">3572419</a> | COG2183K   | transcription accessory protein             | * |
| M5005_Spy_0481c | -         | NC | 470412 | 472544 | 710 | + | <a href="#">3572418</a> | -          | hypothetical protein M5005_Spy_0481         |   |
| M5005_Spy_0482  | -         | NE | 472486 | 472968 | 160 | + | <a href="#">3572420</a> | COG3091S   | hypothetical protein M5005_Spy_0482         |   |
| M5005_Spy_0483  | -         | NE | 473032 | 473304 | 90  | + | <a href="#">3572421</a> | COG1983KT  | stress-responsive transcriptional regulator |   |
| M5005_Spy_0484  | ptsK      | E  | 473609 | 474601 | 330 | + | <a href="#">3572422</a> | COG1493T   | HPr kinase/phosphorylase                    | * |
| M5005_Spy_0485  | lgt       | NE | 474598 | 475377 | 259 | + | <a href="#">3572423</a> | COG0682M   | prolipoprotein diacylglyceryl transferase   | * |
| M5005_Spy_0486  | -         | NE | 475399 | 475806 | 135 | + | <a href="#">3572424</a> | COG4768R   | hypothetical protein M5005_Spy_0486         | * |
| M5005_Spy_0487  | -         | NE | 475799 | 476227 | 142 | + | <a href="#">3572425</a> | -          | hypothetical protein M5005_Spy_0487         | * |
| M5005_Spy_0488c | -         | NE | 476386 | 476670 | 94  | - | <a href="#">3572426</a> | -          | hypothetical protein M5005_Spy_0488         |   |
| M5005_Spy_0489  | -         | NE | 476869 | 477237 | 122 | + | <a href="#">3572427</a> | COG0826O   | U32 family peptidase                        | * |
| M5005_Spy_0491  | -         | NE | 477887 | 479173 | 428 | + | <a href="#">3572429</a> | COG0826O   | U32 family peptidase                        | * |
| M5005_Spy_0492c | -         | NC | 479186 | 479314 | 42  | - | <a href="#">3572430</a> | -          | hypothetical protein M5005_Spy_0492         |   |
| M5005_Spy_0493  | -         | NE | 479383 | 479595 | 70  | + | <a href="#">3572431</a> | COG4443S   | hypothetical protein M5005_Spy_0493         | * |
| M5005_Spy_0494c | -         | NC | 479692 | 479832 | 46  | - | <a href="#">3572432</a> | -          | hypothetical protein M5005_Spy_0494         |   |
| M5005_Spy_0495c | lysS      | E  | 479968 | 481461 | 497 | - | <a href="#">3572433</a> | COG1190J   | lysyl-tRNA synthetase                       | * |
| M5005_Spy_0496  | -         | NE | 481635 | 482537 | 300 | + | <a href="#">3572434</a> | COG1011R   | HAD superfamily hydrolase                   | * |
| M5005_Spy_0497c | -         | NE | 482645 | 483268 | 207 | - | <a href="#">3572396</a> | COG0406G   | phosphoglycerate mutase                     |   |
| M5005_Spy_0498c | -         | NE | 483609 | 484088 | 159 | - | <a href="#">3572397</a> | COG2606S   | transcriptional regulator                   | * |
| M5005_Spy_0499c | -         | NE | 484179 | 484742 | 187 | - | <a href="#">3572398</a> | COG3859S   | thiamine transporter                        | * |
| M5005_Spy_0500c | -         | C  | 485011 | 485859 | 282 | - | <a href="#">3572399</a> | COG3757M   | N-acetylmuramoyl-L-alanine amidase          | * |
| M5005_Spy_0501  | -         | NE | 486184 | 486687 | 167 | + | <a href="#">3572400</a> | -          | hypothetical protein M5005_Spy_0501         | * |
| M5005_Spy_0502  | -         | NE | 486671 | 487057 | 128 | + | <a href="#">3572401</a> | -          | hypothetical protein M5005_Spy_0502         | * |
| M5005_Spy_0503c | -         | NE | 487103 | 487582 | 159 | - | <a href="#">3572402</a> | COG0386O   | glutathione peroxidase                      | * |
| M5005_Spy_0504c | pepF      | NE | 487575 | 489374 | 599 | - | <a href="#">3572403</a> | COG1164E   | oligoendopeptidase F                        | * |
| M5005_Spy_0505  | ppc       | NE | 489518 | 492331 | 937 | + | <a href="#">3572404</a> | COG2352C   | phosphoenolpyruvate carboxylase             | * |
| M5005_Spy_0506  | ftsW      | E  | 492501 | 493775 | 424 | + | <a href="#">3572405</a> | COG0772D   | cell division protein                       | * |
| M5005_Spy_0507c | -         | NC | 493792 | 493932 | 46  | - | <a href="#">3572406</a> | -          | hypothetical protein M5005_Spy_0507         |   |
| M5005_Spy_0508  | tuf       | E  | 494129 | 495325 | 398 | + | <a href="#">3572407</a> | COG0050J   | elongation factor Tu                        | * |
| M5005_Spy_0509  | tpiA      | C  | 495566 | 496324 | 252 | + | <a href="#">3572408</a> | COG0149G   | triosephosphate isomerase                   | * |
| M5005_Spy_0510c | murN      | E  | 496423 | 497658 | 411 | - | <a href="#">3572409</a> | COG2348V   | resistance                                  | * |
| M5005_Spy_0511c | murM      | E  | 497645 | 498871 | 408 | - | <a href="#">3572410</a> | COG2348V   | alanyltransferase/UDP-N-                    | * |
| M5005_Spy_0512c | -         | NE | 498871 | 499680 | 269 | - | <a href="#">3572411</a> | COG0561R   | HAD superfamily hydrolase                   | * |
| M5005_Spy_0513c | -         | NC | 499831 | 500064 | 77  | - | <a href="#">3572412</a> | -          | hypothetical protein M5005_Spy_0513         |   |
| M5005_Spy_0514c | -         | NE | 500136 | 501437 | 433 | - | <a href="#">3572413</a> | COG1078R   | dGTP triphosphohydrolase                    | * |
| M5005_Spy_0515  | -         | NE | 501519 | 501905 | 128 | + | <a href="#">3572414</a> | COG4506S   | hypothetical protein M5005_Spy_0515         | * |
| M5005_Spy_0516  | pacL      | E  | 502136 | 504817 | 893 | + | <a href="#">3572415</a> | COG0474P   | calcium-transporting ATPase                 | * |
| M5005_Spy_0517c | regR      | NE | 504901 | 505896 | 331 | - | <a href="#">3572377</a> | COG1609K   | LacI family transcriptional regulator       | * |
| M5005_Spy_0518c | -         | NE | 505960 | 507867 | 635 | - | <a href="#">3572378</a> | -          | oligohyaluronate lyase                      | * |
| M5005_Spy_0519c | agaD      | NE | 507954 | 508775 | 273 | - | <a href="#">3572379</a> | COG3716G   | transporter subunit IID                     | * |
| M5005_Spy_0520c | agaW      | NE | 508762 | 509544 | 260 | - | <a href="#">3572380</a> | COG3715G   | transporter subunit IIC                     | * |
| M5005_Spy_0521c | agaV      | NE | 509563 | 510051 | 162 | - | <a href="#">3572381</a> | COG3444G   | transporter subunit IIB                     | * |
| M5005_Spy_0522c | ugl       | NE | 510087 | 511286 | 399 | - | <a href="#">3572382</a> | COG4225R   | unsaturated glucuronyl hydrolase            | * |
| M5005_Spy_0523  | -         | NE | 511353 | 511883 | 176 | + | <a href="#">3572383</a> | -          | hypothetical protein M5005_Spy_0523         | * |
| M5005_Spy_0524  | idnO      | NE | 512059 | 512853 | 264 | + | <a href="#">3572384</a> | COG1028IQR | gluconate 5-dehydrogenase                   | * |
| M5005_Spy_0525  | -         | NE | 512878 | 513519 | 213 | + | <a href="#">3572385</a> | COG0698G   | hypothetical protein M5005_Spy_0525         | * |
| M5005_Spy_0526  | kgdK      | NE | 513548 | 514549 | 333 | + | <a href="#">3572386</a> | COG0524G   | 2-dehydro-3-deoxygluconokinase              | * |
| M5005_Spy_0527  | kgdA      | NE | 514554 | 515189 | 211 | + | <a href="#">3572387</a> | COG0800G   | phosphogluconate aldolase                   | * |

|                 |       |    |        |        |      |   |                         |            |                                                   |  |   |
|-----------------|-------|----|--------|--------|------|---|-------------------------|------------|---------------------------------------------------|--|---|
| M5005_Spy_0528  | -     | NE | 515485 | 516135 | 216  | + | <a href="#">3572388</a> | COG0637R   | phosphodismutase                                  |  | * |
| M5005_Spy_0529  | -     | NE | 516776 | 517951 | 391  | + | <a href="#">3572389</a> | COG1600C   | (Fe-S)-binding protein                            |  | * |
| M5005_Spy_0530  | prfB  | E  | 518105 | 519118 | 337  | + | <a href="#">3572390</a> | COG1186J   | peptide chain release factor 2                    |  | * |
| M5005_Spy_0531  | ftsE  | NC | 519137 | 519829 | 230  | + | <a href="#">3572391</a> | COG2884D   | cell division ATP-binding protein                 |  | * |
| M5005_Spy_0532  | ftsX  | C  | 519822 | 520751 | 309  | + | <a href="#">3572392</a> | COG2177D   | cell division protein                             |  | * |
| M5005_Spy_0533c | -     | NE | 521061 | 521696 | 211  | - | <a href="#">3572393</a> | COG0491R   | hydroxyacylglutathione hydrolase                  |  | * |
| M5005_Spy_0534  | -     | NE | 521927 | 522541 | 204  | + | <a href="#">3572394</a> | COG1028IQR | acetoin reductase                                 |  | * |
| M5005_Spy_0535  | -     | NC | 522545 | 522691 | 48   | + | <a href="#">3572395</a> | COG1028IQR | acetoin dehydrogenase, partial                    |  | * |
| M5005_Spy_0536  | dinG  | NE | 522841 | 525300 | 819  | + | <a href="#">3572358</a> | COG1199KL  | polymerase III subunit epsilon                    |  | * |
| M5005_Spy_0537  | aspC  | NE | 525635 | 526828 | 397  | + | <a href="#">3572359</a> | COG0436E   | aspartate aminotransferase                        |  | * |
| M5005_Spy_0538  | asnC  | E  | 526849 | 528195 | 448  | + | <a href="#">3572360</a> | COG0017J   | asparaginyl-tRNA synthetase                       |  | * |
| M5005_Spy_0539  | -     | NE | 528609 | 529499 | 296  | + | <a href="#">3572361</a> | COG1660R   | hypothetical protein M5005_Spy_0539               |  | * |
| M5005_Spy_0540  | -     | NE | 529496 | 530473 | 325  | + | <a href="#">3572362</a> | COG0391S   | transporter                                       |  | * |
| M5005_Spy_0541  | -     | NE | 530470 | 531381 | 303  | + | <a href="#">3572363</a> | COG1481S   | hypothetical protein M5005_Spy_0541               |  | * |
| M5005_Spy_0542  | pepD  | NE | 531514 | 532911 | 465  | + | <a href="#">3572364</a> | COG4690E   | dipeptidase                                       |  | * |
| M5005_Spy_0543  | adcA  | NE | 533063 | 534610 | 515  | + | <a href="#">3572365</a> | COG3443R   | high-affinity zinc uptake system protein znuA     |  | * |
| M5005_Spy_0544  | -     | NE | 534758 | 535480 | 240  | + | <a href="#">3572366</a> | COG2188K   | GntR family transcriptional regulator             |  | * |
| M5005_Spy_0545  | agaS  | NE | 535499 | 536698 | 399  | + | <a href="#">3572367</a> | COG2222M   | galactosamine-6-phosphate deaminase               |  | * |
| M5005_Spy_0546c | rpmE2 | C  | 536795 | 537055 | 86   | - | <a href="#">3572368</a> | COG0254J   | 50S ribosomal protein L31                         |  | * |
| M5005_Spy_0547c | -     | NC | 537170 | 538111 | 313  | - | <a href="#">3572369</a> | COG0618R   | phosphoesterase, DHH family protein               |  | * |
| M5005_Spy_0548  | flaV  | C  | 538505 | 538954 | 149  | + | <a href="#">3572370</a> | COG0716C   | flavodoxin                                        |  | * |
| M5005_Spy_0549  | -     | NE | 539130 | 539414 | 94   | + | <a href="#">3572371</a> | COG1605E   | hypothetical protein M5005_Spy_0549               |  | * |
| M5005_Spy_0550  | -     | NE | 539407 | 540669 | 420  | + | <a href="#">3572372</a> | COG0038P   | chloride channel protein                          |  | * |
| M5005_Spy_0551  | rplS  | NC | 540784 | 541131 | 115  | + | <a href="#">3572373</a> | COG0335J   | 50S ribosomal protein L19                         |  | * |
| M5005_Spy_0552  | -     | NE | 542134 | 542703 | 189  | + | <a href="#">3572375</a> | COG0546R   | DNA gyrase                                        |  | * |
| M5005_Spy_0553  | gyrB  | E  | 542704 | 544656 | 650  | + | <a href="#">3572376</a> | COG0187L   | DNA gyrase subunit B                              |  | * |
| M5005_Spy_0554  | ezrA  | E  | 545024 | 546748 | 574  | + | <a href="#">3572339</a> | COG4477D   | septation ring formation regulator EzrA           |  | * |
| M5005_Spy_0555c | -     | NE | 546880 | 547338 | 152  | - | <a href="#">3572340</a> | COG5506S   | hypothetical protein M5005_Spy_0555               |  | * |
| M5005_Spy_0556  | eno   | E  | 547565 | 548872 | 435  | + | <a href="#">3572341</a> | COG0148G   | phosphopyruvate hydratase                         |  | * |
| M5005_Spy_0557c | -     | NE | 549398 | 549988 | 196  | - | <a href="#">3572342</a> | COG3547L   | transposase                                       |  | * |
| M5005_Spy_0558c | -     | NE | 550037 | 550288 | 83   | - | <a href="#">3572343</a> | -          | transposase                                       |  | * |
| M5005_Spy_0559c | -     | NE | 550650 | 551306 | 218  | - | <a href="#">3572344</a> | -          | transcriptional regulator                         |  | * |
| M5005_Spy_0560c | -     | NE | 551303 | 552190 | 295  | - | <a href="#">3572345</a> | -          | transcriptional regulator                         |  | * |
| M5005_Spy_0561  | epf   | NE | 552662 | 558841 | 2059 | + | <a href="#">3572346</a> | COG5271R   | extracellular matrix binding protein              |  | * |
| M5005_Spy_0562  | sagA  | NE | 559706 | 559867 | 53   | + | <a href="#">3572347</a> | -          | streptolysin S                                    |  | * |
| M5005_Spy_0563  | sagB  | NE | 560089 | 561039 | 316  | + | <a href="#">3572348</a> | COG0778C   | streptolysin S biosynthesis protein               |  | * |
| M5005_Spy_0564  | sagC  | NE | 561036 | 562094 | 352  | + | <a href="#">3572349</a> | -          | streptolysin S biosynthesis protein               |  | * |
| M5005_Spy_0565  | sagD  | NE | 562114 | 563472 | 452  | + | <a href="#">3572350</a> | COG1944S   | streptolysin S biosynthesis protein               |  | * |
| M5005_Spy_0566  | sagE  | NE | 563447 | 564118 | 223  | + | <a href="#">3572351</a> | COG1266R   | streptolysin S self-immunity protein              |  | * |
| M5005_Spy_0567  | sagF  | NE | 564115 | 564798 | 227  | + | <a href="#">3572352</a> | -          | streptolysin S biosynthesis protein               |  | * |
| M5005_Spy_0568  | sagG  | NE | 564821 | 565744 | 307  | + | <a href="#">3572353</a> | COG1131V   | streptolysin S export ATP-binding protein         |  | * |
| M5005_Spy_0569  | sagH  | NE | 565753 | 566880 | 375  | + | <a href="#">3572354</a> | COG1668CP  | streptolysin S export transmembrane protein       |  | * |
| M5005_Spy_0570  | sagI  | NE | 566877 | 567995 | 372  | + | <a href="#">3572355</a> | COG0842V   | streptolysin S export transmembrane protein       |  | * |
| M5005_Spy_0571  | -     | NE | 568566 | 571298 | 910  | + | <a href="#">3572356</a> | COG2374R   | hypothetical protein M5005_Spy_0571               |  | * |
| M5005_Spy_0572  | -     | NE | 571576 | 572076 | 166  | + | <a href="#">3572357</a> | COG4708S   | hypothetical protein M5005_Spy_0572               |  | * |
| M5005_Spy_0573  | ligA  | E  | 572270 | 574228 | 652  | + | <a href="#">3572319</a> | COG0272L   | NAD-dependent DNA ligase LigA                     |  | * |
| M5005_Spy_0574  | -     | E  | 574242 | 575264 | 340  | + | <a href="#">3572320</a> | COG1597IR  | lipid kinase                                      |  | * |
| M5005_Spy_0575  | atpE  | NC | 575657 | 575854 | 65   | + | <a href="#">3572321</a> | COG0636C   | ATP synthase F0F1 subunit C                       |  | * |
| M5005_Spy_0576  | atpB  | NC | 575889 | 576605 | 238  | + | <a href="#">3572322</a> | COG0356C   | ATP synthase F0F1 subunit A                       |  | * |
| M5005_Spy_0577  | atpF  | E  | 576623 | 577117 | 164  | + | <a href="#">3572323</a> | COG0711C   | ATP synthase F0F1 subunit B                       |  | * |
| M5005_Spy_0578  | atpH  | E  | 577117 | 577653 | 178  | + | <a href="#">3572324</a> | COG0712C   | ATP synthase F0F1 subunit delta                   |  | * |
| M5005_Spy_0579  | atpA  | E  | 577669 | 579177 | 502  | + | <a href="#">3572325</a> | COG0056C   | ATP synthase F0F1 subunit alpha                   |  | * |
| M5005_Spy_0580  | atpG  | E  | 579193 | 580068 | 291  | + | <a href="#">3572326</a> | COG0224C   | ATP synthase F0F1 subunit gamma                   |  | * |
| M5005_Spy_0581  | atpD  | E  | 580230 | 581636 | 468  | + | <a href="#">3572327</a> | COG0055C   | ATP synthase F0F1 subunit beta                    |  | * |
| M5005_Spy_0582  | atpC  | NC | 581649 | 582065 | 138  | + | <a href="#">3572328</a> | COG0355C   | ATP synthase F0F1 subunit epsilon                 |  | * |
| M5005_Spy_0583  | -     | NE | 582331 | 582588 | 85   | + | <a href="#">3572329</a> | -          | hypothetical protein M5005_Spy_0583               |  | * |
| M5005_Spy_0584  | murA  | NE | 582815 | 583924 | 369  | + | <a href="#">3572330</a> | COG0766M   | UDP-N-acetylglucosamine 1-carboxyvinyltransferase |  | * |
| M5005_Spy_0585  | epuA  | NE | 583928 | 584116 | 62   | + | <a href="#">3572331</a> | -          | epuA protein                                      |  | * |
| M5005_Spy_0586  | endA  | NE | 584152 | 584691 | 179  | + | <a href="#">3572332</a> | -          | DNA-entry nuclease                                |  | * |

|                 |        |    |        |        |      |   |                         |           |                                                    |   |
|-----------------|--------|----|--------|--------|------|---|-------------------------|-----------|----------------------------------------------------|---|
| M5005_Spy_0587  | pheS   | E  | 584974 | 586017 | 347  | + | <a href="#">3572333</a> | COG0016J  | phenylalanyl-tRNA synthetase subunit alpha         | * |
| M5005_Spy_0588  | pheT   | E  | 586212 | 588632 | 806  | + | <a href="#">3572334</a> | COG0072J  | phenylalanyl-tRNA synthetase subunit beta          | * |
| M5005_Spy_0589  | -      | NE | 588742 | 589119 | 125  | + | <a href="#">3572335</a> | COG1765O  | salt-stress induced protein                        | * |
| M5005_Spy_0590  | -      | NE | 589112 | 589498 | 128  | + | <a href="#">3572336</a> | COG3272S  | hypothetical protein M5005_Spy_0590                | * |
| M5005_Spy_0591  | -      | NE | 589571 | 590647 | 358  | + | <a href="#">3572337</a> | COG0577V  | ABC transporter permease                           | * |
| M5005_Spy_0592  | -      | NE | 590657 | 591325 | 222  | + | <a href="#">3572338</a> | COG1136V  | ABC transporter ATP-binding protein                | * |
| M5005_Spy_0593c | -      | NE | 591427 | 592344 | 305  | - | <a href="#">3572300</a> | COG2321R  | neutral zinc metallopeptidase                      | * |
| M5005_Spy_0594  | rexB   | NC | 592495 | 595710 | 1071 | + | <a href="#">3572301</a> | COG3857L  | ATP-dependent nuclease subunit B                   | * |
| M5005_Spy_0595  | rexA   | C  | 595671 | 599339 | 1222 | + | <a href="#">3572302</a> | COG1074L  | ATP-dependent nuclease subunit A                   | * |
| M5005_Spy_0596  | -      | NE | 599479 | 600291 | 270  | + | <a href="#">3572303</a> | COG0834ET | arginine-binding protein                           | * |
| M5005_Spy_0597  | rpsU   | E  | 600432 | 600608 | 58   | + | <a href="#">3572304</a> | -         | 30S ribosomal protein S21                          | * |
| M5005_Spy_0598c | mscL   | NE | 600736 | 601098 | 120  | - | <a href="#">3572305</a> | COG1970M  | large-conductance mechanosensitive channel         | * |
| M5005_Spy_0599  | dnaG   | E  | 601229 | 603043 | 604  | + | <a href="#">3572306</a> | COG0358L  | DNA primase                                        | * |
| M5005_Spy_0600  | rpoD   | E  | 603052 | 604161 | 369  | + | <a href="#">3572307</a> | COG0568K  | RNA polymerase sigma factor RpoD                   | * |
| M5005_Spy_0601  | -      | NE | 604397 | 604735 | 112  | + | <a href="#">3572308</a> | COG2151R  | hypothetical protein M5005_Spy_0601                | * |
| M5005_Spy_0602  | rmlD   | E  | 604873 | 605727 | 284  | + | <a href="#">3572309</a> | COG1091M  | dTDP-4-dehydrorhamnose reductase                   | * |
| M5005_Spy_0603  | rgpAc  | E  | 605846 | 607000 | 384  | + | <a href="#">3572310</a> | COG0438M  | alpha-(1,2)-rhamnosyltransferase                   | * |
| M5005_Spy_0604  | rgpBc  | E  | 606990 | 607922 | 310  | + | <a href="#">3572311</a> | COG0463M  | alpha-L-Rha alpha-1,3-L-rhamnosyltransferase       | * |
| M5005_Spy_0605  | rgpCc  | E  | 607925 | 608728 | 267  | + | <a href="#">3572312</a> | COG1682GM | polysaccharide export ABC transporter permease     | * |
| M5005_Spy_0606  | rgpDc  | E  | 608728 | 609933 | 401  | + | <a href="#">3572313</a> | COG1134GM | polysaccharide export ATP-binding protein          | * |
| M5005_Spy_0607  | rgpEc  | E  | 609958 | 610965 | 335  | + | <a href="#">3572314</a> | COG0463M  | glycosyltransferase                                | * |
| M5005_Spy_0608  | rgpFc  | E  | 610962 | 612707 | 581  | + | <a href="#">3572315</a> | COG3754M  | alpha-L-Rha alpha-1,3-L-rhamnosyltransferase       | * |
| M5005_Spy_0609  | -      | NE | 612704 | 615178 | 824  | + | <a href="#">3572316</a> | COG1368M  | phosphoglycerol transferase                        | * |
| M5005_Spy_0610  | -      | NE | 615357 | 616052 | 231  | + | <a href="#">3572317</a> | COG0463M  | glycosyltransferase                                | * |
| M5005_Spy_0611  | -      | NE | 616054 | 616395 | 113  | + | <a href="#">3572318</a> | -         | hypothetical protein M5005_Spy_0611                | * |
| M5005_Spy_0612  | amrA   | C  | 616388 | 617674 | 428  | + | <a href="#">3572280</a> | COG2244R  | transcriptional activator                          | * |
| M5005_Spy_0613  | -      | E  | 617655 | 619151 | 498  | + | <a href="#">3572281</a> | COG4713S  | hypothetical protein M5005_Spy_0613                | * |
| M5005_Spy_0614  | pepT   | NE | 619245 | 620468 | 407  | + | <a href="#">3572282</a> | COG2195E  | peptidase T                                        | * |
| M5005_Spy_0615  | ebsA   | NE | 620509 | 620997 | 162  | + | <a href="#">3572283</a> | -         | pore forming protein                               | * |
| M5005_Spy_0616c | -      | NE | 620984 | 621181 | 65   | - | <a href="#">3572284</a> | COG1141C  | ferredoxin                                         | * |
| M5005_Spy_0617  | -      | NC | 621230 | 621706 | 158  | + | <a href="#">3572285</a> | -         | hypothetical protein M5005_Spy_0617                | * |
| M5005_Spy_0618  | cmk    | C  | 621721 | 622401 | 226  | + | <a href="#">3572286</a> | COG0283F  | cytidylate kinase                                  | * |
| M5005_Spy_0619  | infC   | C  | 622563 | 623093 | 176  | + | <a href="#">3572287</a> | COG0290J  | translation initiation factor IF-3                 | * |
| M5005_Spy_0620  | rpmI   | C  | 623135 | 623332 | 65   | + | <a href="#">3572288</a> | COG0291J  | 50S ribosomal protein L35                          | * |
| M5005_Spy_0621  | rplT   | NC | 623391 | 623750 | 119  | + | <a href="#">3572289</a> | COG0292J  | 50S ribosomal protein L20                          | * |
| M5005_Spy_0622c | -      | E  | 624041 | 626212 | 723  | - | <a href="#">3572290</a> | COG1368M  | phosphoglycerol transferase                        | * |
| M5005_Spy_0623  | -      | NE | 626359 | 627522 | 387  | + | <a href="#">3572291</a> | COG1092R  | methyltransferase                                  | * |
| M5005_Spy_0624  | aroD   | NE | 627519 | 628205 | 228  | + | <a href="#">3572292</a> | COG0710E  | 3-dehydroquinate dehydratase                       | * |
| M5005_Spy_0625  | aroF   | NE | 628299 | 629465 | 388  | + | <a href="#">3572293</a> | COG0082E  | chorismate synthase                                | * |
| M5005_Spy_0626  | -      | NE | 629526 | 629867 | 113  | + | <a href="#">3572294</a> | COG3679S  | hypothetical protein M5005_Spy_0626                | * |
| M5005_Spy_0627  | gor    | NE | 630088 | 631440 | 450  | + | <a href="#">3572295</a> | COG1249C  | glutathione reductase                              | * |
| M5005_Spy_0628c | folC.2 | NE | 631528 | 632796 | 422  | - | <a href="#">3572296</a> | COG0285H  | folylpolyglutamate synthase/dihydrofolate synthase | * |
| M5005_Spy_0629c | -      | NE | 632826 | 633266 | 146  | - | <a href="#">3572297</a> | -         | hypothetical protein M5005_Spy_0629                | * |
| M5005_Spy_0630  | nifS1  | NE | 633501 | 634643 | 380  | + | <a href="#">3572298</a> | COG1104E  | cysteine desulfhydrase                             | * |
| M5005_Spy_0631  | thiI   | NE | 634655 | 635869 | 404  | + | <a href="#">3572299</a> | COG0301H  | thiamine biosynthesis protein ThiI                 | * |
| M5005_Spy_0632  | capA   | NE | 635907 | 637199 | 430  | + | <a href="#">3572261</a> | COG2843M  | capsule biosynthesis protein                       | * |
| M5005_Spy_0633  | rplU   | NC | 637413 | 637727 | 104  | + | <a href="#">3572262</a> | COG0261J  | 50S ribosomal protein L21                          | * |
| M5005_Spy_0634  | -      | NC | 637739 | 638065 | 108  | + | <a href="#">3572263</a> | COG2868J  | hypothetical protein M5005_Spy_0634                | * |
| M5005_Spy_0635  | rpmA   | NC | 638093 | 638386 | 97   | + | <a href="#">3572264</a> | COG0211J  | 50S ribosomal protein L27                          | * |
| M5005_Spy_0636  | -      | NE | 638734 | 639648 | 304  | + | <a href="#">3572265</a> | COG0583K  | LysR family transcriptional regulator              | * |
| M5005_Spy_0637  | isp    | NE | 639645 | 640103 | 152  | + | <a href="#">3572266</a> | COG0597MU | lipoprotein signal peptidase                       | * |
| M5005_Spy_0638  | -      | NE | 640093 | 640983 | 296  | + | <a href="#">3572267</a> | COG0564J  | ribosomal large subunit pseudouridine synthase D   | * |
| M5005_Spy_0639  | pyrR   | NE | 641379 | 641900 | 173  | + | <a href="#">3572268</a> | COG2065F  | phosphoribosyltransferase                          | * |
| M5005_Spy_0640  | pyrP   | NE | 641916 | 643175 | 419  | + | <a href="#">3572269</a> | COG2233F  | uracil permease                                    | * |
| M5005_Spy_0641  | pyrB   | NE | 643236 | 644171 | 311  | + | <a href="#">3572270</a> | COG0540F  | aspartate carbamoyltransferase                     | * |
| M5005_Spy_0642  | carA   | NE | 644215 | 645297 | 360  | + | <a href="#">3572271</a> | COG0505EF | carbamoyl phosphate synthase small subunit         | * |
| M5005_Spy_0643  | carB   | NE | 645523 | 648699 | 1058 | + | <a href="#">3572272</a> | COG0458EF | carbamoyl phosphate synthase large subunit         | * |
| M5005_Spy_0644  | -      | NE | 648999 | 650177 | 392  | + | <a href="#">3572273</a> | COG0845M  | periplasmic protein of efflux system               | * |
| M5005_Spy_0645  | -      | NE | 650177 | 650887 | 236  | + | <a href="#">3572274</a> | COG1136V  | ABC transporter ATP-binding protein                | * |

|                 |        |    |        |        |      |   |                         |           |                                                 |  |   |
|-----------------|--------|----|--------|--------|------|---|-------------------------|-----------|-------------------------------------------------|--|---|
| M5005_Spy_0646  | -      | NE | 650899 | 652119 | 406  | + | <a href="#">3572275</a> | COG0577V  | ABC transporter permease                        |  | * |
| M5005_Spy_0647  | -      | NE | 652373 | 654106 | 577  | + | <a href="#">3572276</a> | COG4781C  | glycerophosphoryl diester phosphodiesterase     |  | * |
| M5005_Spy_0648  | rpsP   | NE | 654233 | 654505 | 90   | + | <a href="#">3572277</a> | COG0228J  | 30S ribosomal protein S16                       |  |   |
| M5005_Spy_0649  | -      | NE | 654515 | 654754 | 79   | + | <a href="#">3572278</a> | COG1837R  | RNA binding protein                             |  |   |
| M5005_Spy_0650  | -      | NC | 654763 | 654870 | 35   | + | <a href="#">3572279</a> | -         | hypothetical protein M5005_Spy_0650             |  |   |
| M5005_Spy_0651  | -      | NE | 655665 | 658691 | 1008 | + | <a href="#">3572241</a> | -         | cell surface protein                            |  | * |
| M5005_Spy_0652  | -      | NE | 658711 | 659112 | 133  | + | <a href="#">3572242</a> | COG3576R  | hypothetical protein M5005_Spy_0652             |  | * |
| M5005_Spy_0653c | czcD   | NE | 659292 | 660167 | 291  | - | <a href="#">3572243</a> | COG1230P  | cobalt-zinc-cadmium resistance protein          |  | * |
| M5005_Spy_0654  | -      | NE | 660303 | 660824 | 173  | + | <a href="#">3572244</a> | COG1309K  | TetR family transcriptional regulator           |  | * |
| M5005_Spy_0655  | rimM   | NE | 661039 | 661557 | 172  | + | <a href="#">3572245</a> | COG0806J  | 16S rRNA-processing protein RimM                |  | * |
| M5005_Spy_0656  | trmD   | E  | 661547 | 662278 | 243  | + | <a href="#">3572246</a> | COG0336J  | tRNA (guanine-N(1)-)-methyltransferase          |  | * |
| M5005_Spy_0657  | trxB   | NE | 662278 | 663270 | 330  | + | <a href="#">3572247</a> | COG0492O  | thioredoxin reductase                           |  | * |
| M5005_Spy_0658  | -      | NE | 663448 | 664506 | 352  | + | <a href="#">3572248</a> | COG3641R  | regulatory protein                              |  | * |
| M5005_Spy_0659  | apbA   | NE | 664519 | 665442 | 307  | + | <a href="#">3572249</a> | COG1893H  | 2-dehydropantoate 2-reductase                   |  | * |
| M5005_Spy_0660  | fruR   | NE | 665698 | 666411 | 237  | + | <a href="#">3572250</a> | COG1349KG | fructose repressor                              |  | * |
| M5005_Spy_0661  | fruB   | NE | 666408 | 667319 | 303  | + | <a href="#">3572251</a> | COG1105G  | 1-phosphofructokinase                           |  | * |
| M5005_Spy_0662  | fruA   | NE | 667316 | 669262 | 648  | + | <a href="#">3572252</a> | COG1299G  | IIABC                                           |  | * |
| M5005_Spy_0663  | mur1.1 | NE | 669361 | 669954 | 197  | + | <a href="#">3572253</a> | COG1705NU | autolysin                                       |  | * |
| M5005_Spy_0664  | mur1.2 | NE | 670106 | 670813 | 235  | + | <a href="#">3572254</a> | COG1705NU | autolysin                                       |  | * |
| M5005_Spy_0665c | -      | NE | 670870 | 671088 | 72   | - | <a href="#">3572255</a> | COG2801L  | transposase                                     |  |   |
| M5005_Spy_0666c | -      | NC | 671291 | 671410 | 39   | - | <a href="#">3572256</a> | -         | hypothetical protein M5005_Spy_0666             |  |   |
| M5005_Spy_0667c | -      | NC | 671385 | 671594 | 69   | - | <a href="#">3572257</a> | -         | exotoxin type C                                 |  |   |
| M5005_Spy_0668c | mac    | NE | 671769 | 672788 | 339  | - | <a href="#">3572258</a> | -         | IgG-degrading protease                          |  |   |
| M5005_Spy_0669  | -      | NC | 672944 | 673063 | 39   | + | <a href="#">3572259</a> | -         | phage protein                                   |  |   |
| M5005_Spy_0670  | -      | NE | 673287 | 673463 | 58   | + | <a href="#">3572260</a> | COG0105F  | nucleoside diphosphate kinase                   |  |   |
| M5005_Spy_0671  | -      | NE | 673691 | 674071 | 126  | + | <a href="#">3572222</a> | COG4835S  | transposase                                     |  | * |
| M5005_Spy_0672  | -      | NE | 674071 | 674919 | 282  | + | <a href="#">3572223</a> | COG1307S  | degV family protein                             |  | * |
| M5005_Spy_0673  | papS   | E  | 675044 | 676252 | 402  | + | <a href="#">3572224</a> | COG0617J  | tRNA CCA-pyrophosphorylase                      |  | * |
| M5005_Spy_0674  | -      | NE | 676249 | 678126 | 625  | + | <a href="#">3572225</a> | COG0488R  | ABC transporter ATP-binding protein             |  | * |
| M5005_Spy_0675  | -      | NC | 678383 | 678535 | 50   | + | <a href="#">3572226</a> | -         | hypothetical protein M5005_Spy_0675             |  |   |
| M5005_Spy_0676  | -      | NE | 678544 | 678762 | 72   | + | <a href="#">3572227</a> | -         | hypothetical protein M5005_Spy_0676             |  |   |
| M5005_Spy_0677  | fms    | NE | 679018 | 679428 | 136  | + | <a href="#">3572228</a> | COG0242J  | peptide deformylase                             |  | * |
| M5005_Spy_0678c | -      | NE | 679510 | 681522 | 670  | - | <a href="#">3572229</a> | COG0737F  | 5'-nucleotidase                                 |  | * |
| M5005_Spy_0679  | -      | NE | 681742 | 682392 | 216  | + | <a href="#">3572230</a> | COG2357S  | GTP pyrophosphokinase                           |  | * |
| M5005_Spy_0680  | -      | NE | 682395 | 683063 | 222  | + | <a href="#">3572231</a> | COG0745TK | two-component response regulator                |  | * |
| M5005_Spy_0681  | -      | NE | 683072 | 684304 | 410  | + | <a href="#">3572232</a> | COG0642T  | two-component system histidine kinase           |  | * |
| M5005_Spy_0682  | mvaK1  | E  | 684583 | 685476 | 297  | + | <a href="#">3572233</a> | COG1577I  | mevalonate kinase                               |  | * |
| M5005_Spy_0683  | mvaD   | E  | 685458 | 686402 | 314  | + | <a href="#">3572234</a> | COG3407I  | diphosphomevalonate decarboxylase               |  | * |
| M5005_Spy_0684  | mvaK2  | NC | 686395 | 687402 | 335  | + | <a href="#">3572235</a> | COG1577I  | phosphomevalonate kinase                        |  | * |
| M5005_Spy_0685  | -      | E  | 687395 | 688384 | 329  | + | <a href="#">3572236</a> | COG1304C  | isopentenyl pyrophosphate isomerase             |  | * |
| M5005_Spy_0686c | -      | C  | 688614 | 689891 | 425  | - | <a href="#">3572237</a> | COG1257I  | 3-hydroxy-3-methylglutaryl-CoA reductase        |  | * |
| M5005_Spy_0687c | mvaS.1 | E  | 689878 | 691053 | 391  | - | <a href="#">3572238</a> | COG3425I  | hydroxymethylglutaryl-CoA synthase              |  | * |
| M5005_Spy_0688  | thyA   | NC | 691262 | 692101 | 279  | + | <a href="#">3572239</a> | COG0207F  | thymidylate synthase                            |  | * |
| M5005_Spy_0689  | dyr    | E  | 692181 | 692678 | 165  | + | <a href="#">3572240</a> | COG0262H  | dihydrofolate reductase                         |  | * |
| M5005_Spy_0690  | -      | NE | 692698 | 692868 | 56   | + | <a href="#">3572202</a> | -         | hypothetical protein M5005_Spy_0690             |  |   |
| M5005_Spy_0691  | clpX   | NE | 692998 | 694227 | 409  | + | <a href="#">3572203</a> | COG1219O  | ATP-dependent protease ATP-binding subunit ClpX |  | * |
| M5005_Spy_0692  | engB   | E  | 694237 | 694836 | 199  | + | <a href="#">3572204</a> | COG0218R  | ribosome biogenesis GTP-binding protein YsxC    |  | * |
| M5005_Spy_0693  | -      | NE | 694984 | 695727 | 247  | + | <a href="#">3572205</a> | -         | hypothetical protein M5005_Spy_0693             |  | * |
| M5005_Spy_0694c | clpL   | NE | 695785 | 697884 | 699  | - | <a href="#">3572206</a> | COG0542O  | ATP-dependent protease ATP-binding subunit      |  | * |
| M5005_Spy_0695  | rpiA   | C  | 698263 | 698946 | 227  | + | <a href="#">3572207</a> | COG0120G  | ribose-5-phosphate isomerase A                  |  | * |
| M5005_Spy_0696  | deoB   | NE | 699023 | 700234 | 403  | + | <a href="#">3572208</a> | COG1015G  | phosphopentomutase                              |  | * |
| M5005_Spy_0697  | arsC   | NE | 700253 | 700693 | 146  | + | <a href="#">3572209</a> | COG1393P  | arsenate reductase                              |  | * |
| M5005_Spy_0698  | punA   | NC | 700677 | 701486 | 269  | + | <a href="#">3572210</a> | COG0005F  | purine nucleoside phosphorylase                 |  | * |
| M5005_Spy_0699  | deoD   | NE | 702149 | 702862 | 237  | + | <a href="#">3572211</a> | COG0813F  | purine nucleoside phosphorylase                 |  | * |
| M5005_Spy_0700  | cpsX   | NE | 702855 | 703643 | 262  | + | <a href="#">3572212</a> | -         | LytR family transcriptional regulator           |  |   |
| M5005_Spy_0701c | cpsY   | NE | 703722 | 704576 | 284  | - | <a href="#">3572213</a> | COG0583K  | LysR family transcriptional regulator           |  | * |
| M5005_Spy_0702  | -      | NE | 704849 | 705385 | 178  | + | <a href="#">3572214</a> | -         | hypothetical protein M5005_Spy_0702             |  | * |
| M5005_Spy_0703  | pyrF   | NE | 705662 | 706354 | 230  | + | <a href="#">3572215</a> | COG0284F  | orotidine 5'-phosphate decarboxylase            |  | * |
| M5005_Spy_0704  | pyrE   | NE | 706412 | 707041 | 209  | + | <a href="#">3572216</a> | COG0461F  | orotate phosphoribosyltransferase               |  | * |

|                 |            |    |        |        |     |   |                         |           |                                                    |  |   |
|-----------------|------------|----|--------|--------|-----|---|-------------------------|-----------|----------------------------------------------------|--|---|
| M5005_Spy_0705  | amiC       | NE | 707238 | 708692 | 484 | + | <a href="#">3572217</a> | COG0154J  | amidase                                            |  | * |
| M5005_Spy_0706  | -          | NE | 708810 | 709673 | 287 | + | <a href="#">3572218</a> | COG0834ET | cystine-binding protein                            |  | * |
| M5005_Spy_0707  | -          | NE | 709702 | 710352 | 216 | + | <a href="#">3572219</a> | COG0765E  | cystine transporter permease                       |  | * |
| M5005_Spy_0708  | ung        | NE | 710485 | 711138 | 217 | + | <a href="#">3572220</a> | COG0692L  | uracil-DNA glycosylase                             |  | * |
| M5005_Spy_0709  | pyrC       | NE | 711270 | 712538 | 422 | + | <a href="#">3572221</a> | COG0044F  | dihydroorotase                                     |  | * |
| M5005_Spy_0710c | -          | E  | 712596 | 713237 | 213 | - | <a href="#">3572186</a> | COG0344S  | glycerol-3-phosphate acyltransferase               |  | * |
| M5005_Spy_0711  | parE       | E  | 713372 | 715321 | 649 | + | <a href="#">3572187</a> | COG0187L  | DNA topoisomerase IV subunit B                     |  | * |
| M5005_Spy_0712  | parC       | E  | 715412 | 717871 | 819 | + | <a href="#">3572188</a> | COG0188L  | DNA topoisomerase IV subunit A                     |  | * |
| M5005_Spy_0713  | bcaT       | NE | 717994 | 719016 | 340 | + | <a href="#">3572189</a> | COG0115EH | branched-chain amino acid aminotransferase         |  | * |
| M5005_Spy_0714  | -          | NC | 719080 | 719310 | 76  | + | <a href="#">3572190</a> | -         | hypothetical protein M5005_Spy_0714                |  | * |
| M5005_Spy_0715  | rpsA       | E  | 719701 | 720906 | 401 | + | <a href="#">3572193</a> | COG0539J  | 30S ribosomal protein S1                           |  | * |
| M5005_Spy_0716c | -          | NE | 721453 | 721755 | 100 | - | <a href="#">3572195</a> | -         | hypothetical protein M5005_Spy_0716                |  | * |
| M5005_Spy_0717  | -          | NE | 721954 | 722940 | 328 | + | <a href="#">3572196</a> | COG1054R  | hypothetical protein M5005_Spy_0717                |  | * |
| M5005_Spy_0718  | -          | NE | 723011 | 723202 | 63  | + | <a href="#">3572197</a> | -         | hypothetical protein M5005_Spy_0718                |  | * |
| M5005_Spy_0719  | -          | NE | 723251 | 723670 | 139 | + | <a href="#">3572198</a> | COG0625O  | glutathione S-transferase                          |  | * |
| M5005_Spy_0720  | -          | NE | 723907 | 724815 | 302 | + | <a href="#">3572199</a> | COG1275P  | exfoliative toxin                                  |  | * |
| M5005_Spy_0721c | -          | NC | 724933 | 725109 | 58  | - | <a href="#">3572200</a> | -         | hypothetical protein M5005_Spy_0721                |  | * |
| M5005_Spy_0722  | miaA       | NE | 725243 | 726142 | 299 | + | <a href="#">3572201</a> | COG0324J  | tRNA delta(2)-isopentenylpyrophosphate transferase |  | * |
| M5005_Spy_0723  | hflX       | NE | 726215 | 727453 | 412 | + | <a href="#">3572166</a> | COG2262R  | GTP-binding protein                                |  | * |
| M5005_Spy_0724  | -          | NE | 727446 | 728081 | 211 | + | <a href="#">3572167</a> | COG4468G  | hypothetical protein M5005_Spy_0724                |  | * |
| M5005_Spy_0725  | elaC       | E  | 728096 | 729025 | 309 | + | <a href="#">3572168</a> | COG1234R  | ribonuclease Z                                     |  | * |
| M5005_Spy_0726  | -          | NE | 729025 | 729789 | 254 | + | <a href="#">3572169</a> | COG0300R  | short chain dehydrogenase                          |  | * |
| M5005_Spy_0727  | recJ       | NE | 729786 | 731996 | 736 | + | <a href="#">3572170</a> | COG0608L  | single-stranded-DNA-specific exonuclease           |  | * |
| M5005_Spy_0728  | apt        | NE | 732147 | 732665 | 172 | + | <a href="#">3572171</a> | COG0503F  | adenine phosphoribosyltransferase                  |  | * |
| M5005_Spy_0729  | dnaD       | NC | 732746 | 733429 | 227 | + | <a href="#">3572172</a> | COG3935L  | DNA replication protein                            |  | * |
| M5005_Spy_0730  | nth        | NE | 733426 | 734082 | 218 | + | <a href="#">3572173</a> | COG0177L  | endonuclease III                                   |  | * |
| M5005_Spy_0731  | -          | E  | 734154 | 734738 | 194 | + | <a href="#">3572174</a> | COG2384R  | I/antranilate synthase component I                 |  | * |
| M5005_Spy_0732  | -          | NE | 734829 | 735617 | 262 | + | <a href="#">3572175</a> | COG0327S  | NIF3-related protein                               |  | * |
| M5005_Spy_0733  | -          | NE | 735657 | 736763 | 368 | + | <a href="#">3572176</a> | COG0665E  | glycine/D-amino acid oxidase                       |  | * |
| M5005_Spy_0734  | cpsFO/rmlA | E  | 736821 | 737690 | 289 | + | <a href="#">3572177</a> | COG1209M  | glucose-1-phosphate thymidyllyltransferase         |  | * |
| M5005_Spy_0735  | cpsFP/rmlC | NC | 737690 | 738283 | 197 | + | <a href="#">3572178</a> | COG1898M  | dTDP-4-dehydrothamnose 3,5-epimerase               |  | * |
| M5005_Spy_0736  | cpsFQ/rmlB | E  | 738527 | 739567 | 346 | + | <a href="#">3572179</a> | COG1088M  | dTDP-glucose 4,6-dehydratase                       |  | * |
| M5005_Spy_0737  | mutX       | NE | 739788 | 740264 | 158 | + | <a href="#">3572180</a> | COG1051F  | 7,8-dihydro-8-oxoguanine-triphosphatase            |  | * |
| M5005_Spy_0738  | -          | NE | 740322 | 741503 | 393 | + | <a href="#">3572181</a> | COG0628R  | hypothetical protein M5005_Spy_0738                |  | * |
| M5005_Spy_0739  | -          | NE | 741493 | 742740 | 415 | + | <a href="#">3572182</a> | COG2956G  | hypothetical protein M5005_Spy_0739                |  | * |
| M5005_Spy_0740c | fbp        | NE | 742799 | 744085 | 428 | - | <a href="#">3572183</a> | COG1293K  | fibronectin-binding protein                        |  | * |
| M5005_Spy_0742  | -          | NC | 744497 | 744622 | 41  | + | <a href="#">3572185</a> | -         | hypothetical protein M5005_Spy_0742                |  | * |
| M5005_Spy_0743  | -          | NE | 744804 | 745802 | 332 | + | <a href="#">3572147</a> | COG2984R  | ABC transporter substrate-binding protein          |  | * |
| M5005_Spy_0744  | -          | NC | 745792 | 745971 | 59  | + | <a href="#">3572148</a> | -         | hypothetical protein M5005_Spy_0744                |  | * |
| M5005_Spy_0745  | -          | NE | 746148 | 747017 | 289 | + | <a href="#">3572149</a> | COG4120R  | ABC transporter permease                           |  | * |
| M5005_Spy_0746  | -          | NE | 747014 | 747772 | 252 | + | <a href="#">3572150</a> | COG1101R  | ABC transporter ATP-binding protein                |  | * |
| M5005_Spy_0747  | -          | E  | 747976 | 749637 | 553 | + | <a href="#">3572151</a> | COG0595R  | Zn-dependent hydrolase                             |  | * |
| M5005_Spy_0748  | estA       | NE | 749770 | 750555 | 261 | + | <a href="#">3572152</a> | COG0627R  | acetyl esterase                                    |  | * |
| M5005_Spy_0749  | -          | NE | 750585 | 750911 | 108 | + | <a href="#">3572153</a> | -         | hypothetical protein M5005_Spy_0749                |  | * |
| M5005_Spy_0750  | -          | NE | 750957 | 752864 | 635 | + | <a href="#">3572154</a> | COG0488R  | ABC transporter ATP-binding protein                |  | * |
| M5005_Spy_0751  | acoA       | NE | 753149 | 754117 | 322 | + | <a href="#">3572155</a> | COG1071C  | alpha                                              |  | * |
| M5005_Spy_0752  | acoB       | NE | 754173 | 755174 | 333 | + | <a href="#">3572156</a> | COG0022C  | pyruvate dehydrogenase E1 component subunit beta   |  | * |
| M5005_Spy_0753  | acoC       | NE | 755359 | 756768 | 469 | + | <a href="#">3572157</a> | COG0508C  | subunit E2                                         |  | * |
| M5005_Spy_0754c | -          | NE | 756823 | 757062 | 79  | - | <a href="#">3572158</a> | -         | hypothetical protein M5005_Spy_0754                |  | * |
| M5005_Spy_0755  | acoL       | NE | 757095 | 758858 | 587 | + | <a href="#">3572159</a> | COG1249C  | dihydroliipoamide dehydrogenase                    |  | * |
| M5005_Spy_0756c | -          | NE | 758874 | 759086 | 70  | - | <a href="#">3572160</a> | -         | hypothetical protein M5005_Spy_0756                |  | * |
| M5005_Spy_0757c | hylA       | NE | 759532 | 761949 | 805 | - | <a href="#">3572161</a> | -         | hyaluronate lyase                                  |  | * |
| M5005_Spy_0758  | lplB       | NE | 762182 | 763171 | 329 | + | <a href="#">3572162</a> | COG0095H  | lipoate-protein ligase A                           |  | * |
| M5005_Spy_0759c | cobQ       | E  | 763280 | 764071 | 263 | + | <a href="#">3572163</a> | COG3442R  | hypothetical protein M5005_Spy_0759                |  | * |
| M5005_Spy_0760c | murC2      | E  | 764071 | 765414 | 447 | - | <a href="#">3572164</a> | COG0769M  | diaminopimelate ligase                             |  | * |
| M5005_Spy_0761  | -          | E  | 765521 | 766372 | 283 | + | <a href="#">3572165</a> | COG1624S  | hypothetical protein M5005_Spy_0761                |  | * |
| M5005_Spy_0762  | -          | NE | 766369 | 767325 | 318 | + | <a href="#">3572127</a> | COG4856S  | hypothetical protein M5005_Spy_0762                |  | * |
| M5005_Spy_0763  | glmM       | E  | 767379 | 768734 | 451 | + | <a href="#">3572128</a> | COG1109G  | phosphoglucosamine mutase                          |  | * |
| M5005_Spy_0764  | -          | NE | 768868 | 769509 | 213 | + | <a href="#">3572129</a> | -         | hypothetical protein M5005_Spy_0764                |  | * |



|                 |           |    |        |        |      |   |                         |           |                                                     |   |
|-----------------|-----------|----|--------|--------|------|---|-------------------------|-----------|-----------------------------------------------------|---|
| M5005_Spy_0765  | hemN      | NE | 769506 | 770702 | 398  | + | <a href="#">3572130</a> | COG0635H  | coproporphyrinogen III oxidase                      | * |
| M5005_Spy_0766  | -         | C  | 770712 | 771464 | 250  | + | <a href="#">3572131</a> | COG3884I  | acyl-ACP thioesterase                               | * |
| M5005_Spy_0767  | -         | NE | 771464 | 772228 | 254  | + | <a href="#">3572132</a> | COG0647G  | 4-nitrophenylphosphatase                            | * |
| M5005_Spy_0768  | -         | NE | 772228 | 772860 | 210  | + | <a href="#">3572133</a> | COG4478S  | hypothetical protein M5005_Spy_0768                 |   |
| M5005_Spy_0769  | cas9      | NE | 773340 | 777446 | 1368 | + | <a href="#">3572134</a> | COG3513S  | hypothetical protein M5005_Spy_0769                 |   |
| M5005_Spy_0770  | cas1      | NE | 777446 | 778315 | 289  | + | <a href="#">3572135</a> | COG1518L  | hypothetical protein M5005_Spy_0770                 |   |
| M5005_Spy_0771  | cas2      | NE | 778312 | 778653 | 113  | + | <a href="#">3572136</a> | COG3512S  | hypothetical protein M5005_Spy_0771                 |   |
| M5005_Spy_0772  | csn2      | NE | 778643 | 779305 | 220  | + | <a href="#">3572137</a> | -         | hypothetical protein M5005_Spy_0772                 |   |
| M5005_Spy_0773c | -         | NE | 779352 | 779639 | 95   | - | <a href="#">3572138</a> | -         | hypothetical protein M5005_Spy_0773                 |   |
| M5005_Spy_0774  | -         | NE | 779772 | 779951 | 59   | + | <a href="#">3572139</a> | -         | nucleoside diphosphate kinase                       |   |
| M5005_Spy_0775  | -         | NC | 780015 | 780161 | 48   | + | <a href="#">3572140</a> | COG0105F  | nucleoside diphosphate kinase                       |   |
| M5005_Spy_0776  | lepA      | NE | 780285 | 782117 | 610  | + | <a href="#">3572141</a> | COG0481M  | GTP-binding protein LepA                            |   |
| M5005_Spy_0777  | sclB      | NE | 782375 | 783256 | 293  | + | <a href="#">3572142</a> | -         | hypothetical protein M5005_Spy_0777                 |   |
| M5005_Spy_0778  | msrB/crsA | NE | 783442 | 783879 | 145  | + | <a href="#">3572143</a> | COG0229O  | methionine sulfoxide reductase B                    | * |
| M5005_Spy_0779  | -         | NE | 783994 | 785013 | 339  | + | <a href="#">3572144</a> | COG2855S  | hypothetical protein M5005_Spy_0779                 | * |
| M5005_Spy_0780  | -         | NE | 785220 | 785645 | 141  | + | <a href="#">3572145</a> | COG2893G  | subunit IIA                                         | * |
| M5005_Spy_0781  | ptsB      | NE | 785664 | 786155 | 163  | + | <a href="#">3572146</a> | COG3444G  | subunit IIB                                         | * |
| M5005_Spy_0782  | ptsC      | NE | 786172 | 786981 | 269  | + | <a href="#">3572108</a> | COG3715G  | subunit IIC                                         | * |
| M5005_Spy_0783  | ptsD      | NE | 786978 | 787805 | 275  | + | <a href="#">3572109</a> | COG3716G  | subunit IID                                         | * |
| M5005_Spy_0784  | -         | NE | 787941 | 789590 | 549  | + | <a href="#">3572110</a> | COG2972T  | two-component sensor kinase                         | * |
| M5005_Spy_0785  | -         | NE | 789594 | 790382 | 262  | + | <a href="#">3572111</a> | COG4753T  | two-component response regulator                    | * |
| M5005_Spy_0786  | -         | NE | 790376 | 791422 | 348  | + | <a href="#">3572112</a> | COG1840P  | iron(III)-binding protein                           | * |
| M5005_Spy_0787  | -         | NE | 791519 | 791866 | 115  | + | <a href="#">3572113</a> | COG0727R  | hypothetical protein M5005_Spy_0787                 |   |
| M5005_Spy_0788  | -         | NE | 792201 | 792767 | 188  | + | <a href="#">3572114</a> | COG0110R  | acetyltransferase                                   |   |
| M5005_Spy_0789  | -         | NE | 792783 | 793472 | 229  | + | <a href="#">3572115</a> | COG1011R  | HAD superfamily hydrolase                           |   |
| M5005_Spy_0790  | gabD      | NE | 793567 | 794964 | 465  | + | <a href="#">3572116</a> | COG1012C  | succinate-semialdehyde dehydrogenase                | * |
| M5005_Spy_0791  | uvrC      | NE | 795066 | 796862 | 598  | + | <a href="#">3572117</a> | COG0322L  | excinuclease ABC subunit C                          | * |
| M5005_Spy_0792  | -         | NE | 797047 | 797649 | 200  | + | <a href="#">3572118</a> | COG0778C  | NAD(P)H-dependent quinone reductase                 | * |
| M5005_Spy_0793  | -         | NE | 797774 | 799183 | 469  | + | <a href="#">3572119</a> | COG0624E  | dipeptidase PepV                                    | * |
| M5005_Spy_0794c | trmE      | C  | 799251 | 800627 | 458  | - | <a href="#">3572120</a> | COG0486R  | tRNA modification GTPase TrmE                       | * |
| M5005_Spy_0795  | rplJ      | NE | 800960 | 801460 | 166  | + | <a href="#">3572121</a> | COG0244J  | 50S ribosomal protein L10                           | * |
| M5005_Spy_0796  | rplL      | NE | 801525 | 801890 | 121  | + | <a href="#">3572122</a> | COG0222J  | 50S ribosomal protein L7/L12                        | * |
| M5005_Spy_0797  | -         | NC | 802286 | 802426 | 46   | + | <a href="#">3572123</a> | -         | hypothetical protein M5005_Spy_0797                 |   |
| M5005_Spy_0798  | -         | NE | 802420 | 802788 | 122  | + | <a href="#">3572124</a> | -         | IFN-response binding factor 1                       |   |
| M5005_Spy_0799  | -         | NC | 802767 | 802904 | 45   | + | <a href="#">3572125</a> | -         | hypothetical protein M5005_Spy_0799                 |   |
| M5005_Spy_0800  | -         | NE | 802963 | 803286 | 107  | + | <a href="#">3572126</a> | COG0270L  | DNA-cytosine methyltransferase                      |   |
| M5005_Spy_0801  | -         | NC | 803344 | 803466 | 40   | + | <a href="#">3572088</a> | -         | relaxase                                            |   |
| M5005_Spy_0802  | -         | NE | 803599 | 803811 | 70   | + | <a href="#">3572089</a> | -         | relaxase                                            |   |
| M5005_Spy_0803  | srtI      | NE | 804076 | 804771 | 231  | + | <a href="#">3572090</a> | -         | lantibiotic production protein                      |   |
| M5005_Spy_0804  | srtR      | NE | 804922 | 805608 | 228  | + | <a href="#">3572091</a> | COG0745TK | nisin biosynthesis two-component response regulator |   |
| M5005_Spy_0805  | srtK      | NE | 805601 | 806947 | 448  | + | <a href="#">3572092</a> | COG0642T  | nisin biosynthesis sensor protein                   |   |
| M5005_Spy_0806  | srtA      | NC | 807095 | 807235 | 46   | + | <a href="#">3572093</a> | -         | lantibiotic protein                                 |   |
| M5005_Spy_0807  | srtT      | NE | 807350 | 807967 | 205  | + | <a href="#">3572094</a> | COG1132V  | lantibiotic ABC transporter ATP-binding protein     |   |
| M5005_Spy_0808  | srtF      | NE | 808049 | 808738 | 229  | + | <a href="#">3572095</a> | COG1131V  | lantibiotic ABC transporter ATP-binding protein     |   |
| M5005_Spy_0809  | srtE      | NE | 808744 | 809493 | 249  | + | <a href="#">3572096</a> | -         | lantibiotic transport permease                      |   |
| M5005_Spy_0810  | srtG      | NE | 809496 | 810218 | 240  | + | <a href="#">3572097</a> | COG4200S  | lantibiotic transport permease                      |   |
| M5005_Spy_0811  | -         | NE | 810410 | 810628 | 72   | + | <a href="#">3572098</a> | COG1396K  | Cro/CI family transcriptional regulator             |   |
| M5005_Spy_0812c | -         | NE | 810737 | 810952 | 71   | - | <a href="#">3572099</a> | -         | hypothetical protein M5005_Spy_0812                 |   |
| M5005_Spy_0817  | dacA1     | NE | 812371 | 813699 | 442  | + | <a href="#">3572104</a> | COG1686M  | D-alanyl-D-alanine carboxypeptidase                 | * |
| M5005_Spy_0818c | -         | NE | 813816 | 814778 | 320  | - | <a href="#">3572105</a> | COG0726G  | polysaccharide deacetylase                          | * |
| M5005_Spy_0819  | -         | NC | 814866 | 815021 | 51   | + | <a href="#">3572106</a> | -         | hypothetical protein M5005_Spy_0819                 |   |
| M5005_Spy_0820  | folC.1    | E  | 815110 | 816387 | 425  | + | <a href="#">3572107</a> | COG0285H  | folylpolyglutamate synthase/dihydrofolate synthase  |   |
| M5005_Spy_0821  | folE      | NE | 816434 | 817000 | 188  | + | <a href="#">3572069</a> | COG0302H  | GTP cyclohydrolase I                                | * |
| M5005_Spy_0822  | folP      | C  | 817009 | 817809 | 266  | + | <a href="#">3572070</a> | COG0294H  | dihydropteroate synthase                            | * |
| M5005_Spy_0823  | folQ      | NE | 817816 | 818175 | 119  | + | <a href="#">3572071</a> | COG1539H  | dihydroneopterin aldolase                           | * |
| M5005_Spy_0824  | folK      | NC | 818172 | 818672 | 166  | + | <a href="#">3572072</a> | COG0801H  | hydroxymethylidihydropteridine pyrophosphokinase    | * |
| M5005_Spy_0825  | murB      | E  | 818822 | 819709 | 295  | + | <a href="#">3572073</a> | COG0812M  | UDP-N-acetylenolpyruvoylglucosamine reductase       | * |
| M5005_Spy_0826  | potA      | NE | 819755 | 820909 | 384  | + | <a href="#">3572074</a> | COG3842E  | protein                                             | * |
| M5005_Spy_0827  | potB      | NE | 820893 | 821687 | 264  | + | <a href="#">3572075</a> | COG1176E  | spermidine/putrescine transporter permease          | * |

|                 |          |    |        |        |     |   |                         |           |                                                  |  |   |
|-----------------|----------|----|--------|--------|-----|---|-------------------------|-----------|--------------------------------------------------|--|---|
| M5005_Spy_0828  | potC     | NE | 821684 | 822460 | 258 | + | <a href="#">3572076</a> | COG1177E  | spermidine/putrescine transporter permease       |  | * |
| M5005_Spy_0829  | potD     | NE | 822453 | 823526 | 357 | + | <a href="#">3572077</a> | COG0687E  | spermidine/putrescine-binding protein            |  | * |
| M5005_Spy_0830c | dpiA     | NE | 823581 | 824246 | 221 | - | <a href="#">3572078</a> | COG4565KT | transcriptional regulatory protein               |  | * |
| M5005_Spy_0831c | dpiB     | NE | 824227 | 825768 | 513 | - | <a href="#">3572079</a> | COG3290T  | sensor kinase                                    |  | * |
| M5005_Spy_0832  | malP     | NE | 825929 | 827260 | 443 | + | <a href="#">3572080</a> | COG3493C  | malate-sodium symport                            |  | * |
| M5005_Spy_0833  | -        | NE | 827291 | 828457 | 388 | + | <a href="#">3572081</a> | COG0281C  | NAD-dependent malic enzyme                       |  | * |
| M5005_Spy_0834c | -        | NE | 828540 | 829631 | 363 | - | <a href="#">3572082</a> | COG1063ER | dehydrogenase                                    |  | * |
| M5005_Spy_0835  | aphA     | NE | 829825 | 830187 | 120 | + | <a href="#">3572083</a> | COG3700R  | class B acid phosphatase                         |  | * |
| M5005_Spy_0837  | -        | NE | 830733 | 832265 | 510 | + | <a href="#">3572085</a> | COG0038P  | chloride channel protein                         |  | * |
| M5005_Spy_0838  | -        | NE | 832428 | 833042 | 204 | + | <a href="#">3572086</a> | COG2755E  | lipase/acylhydrolase                             |  | * |
| M5005_Spy_0839  | -        | NE | 833222 | 834349 | 375 | + | <a href="#">3572087</a> | COG0628R  | hypothetical protein M5005_Spy_0839              |  | * |
| M5005_Spy_0840  | radC     | NE | 834398 | 835078 | 226 | + | <a href="#">3572049</a> | COG2003L  | DNA repair protein RadC                          |  | * |
| M5005_Spy_0841c | -        | NE | 835080 | 835775 | 231 | - | <a href="#">3572050</a> | COG2071R  | glutamine amidotransferase, class I              |  | * |
| M5005_Spy_0842c | -        | NE | 835785 | 836429 | 214 | - | <a href="#">3572051</a> | COG2344R  | redox-sensing transcriptional repressor Rex      |  | * |
| M5005_Spy_0843c | -        | NE | 836681 | 837028 | 115 | - | <a href="#">3572052</a> | -         | hypothetical protein M5005_Spy_0843              |  | * |
| M5005_Spy_0844c | nifS2    | E  | 837018 | 838145 | 375 | - | <a href="#">3572053</a> | COG1104E  | cysteine desulfhydrase                           |  | * |
| M5005_Spy_0845c | prs      | NE | 838142 | 839122 | 326 | - | <a href="#">3572054</a> | COG0462FE | ribose-phosphate pyrophosphokinase               |  | * |
| M5005_Spy_0846c | -        | NE | 839262 | 839840 | 192 | - | <a href="#">3572055</a> | COG4116S  | adenylate cyclase                                |  | * |
| M5005_Spy_0847  | -        | NE | 839928 | 840599 | 223 | + | <a href="#">3572056</a> | COG2357S  | GTP pyrophosphokinase                            |  | * |
| M5005_Spy_0848  | ppnK     | E  | 840574 | 841410 | 278 | + | <a href="#">3572057</a> | COG0061G  | inorganic polyphosphate/ATP-NAD kinase           |  | * |
| M5005_Spy_0849  | rluD     | NE | 841407 | 842312 | 301 | + | <a href="#">3572058</a> | COG0564J  | ribosomal large subunit pseudouridine synthase D |  | * |
| M5005_Spy_0851  | pta/eutD | NE | 842489 | 843310 | 273 | + | <a href="#">3572060</a> | COG0280C  | phosphotransacetylase                            |  | * |
| M5005_Spy_0852  | -        | NE | 843437 | 844054 | 205 | + | <a href="#">3572061</a> | COG4221R  | short chain dehydrogenase                        |  | * |
| M5005_Spy_0853  | -        | NC | 844051 | 844209 | 52  | + | <a href="#">3572062</a> | COG4221R  | short chain dehydrogenase                        |  | * |
| M5005_Spy_0854c | -        | NE | 844403 | 845092 | 229 | - | <a href="#">3572063</a> | -         | Na+ driven multidrug efflux pump                 |  | * |
| M5005_Spy_0855  | proV     | NE | 845512 | 846240 | 242 | + | <a href="#">3572064</a> | COG1125E  | glycine betaine transport ATP-binding protein    |  | * |
| M5005_Spy_0856  | proX     | NE | 846233 | 847759 | 508 | + | <a href="#">3572065</a> | COG1732M  | glycine betaine transporter permease             |  | * |
| M5005_Spy_0857  | guaC     | NE | 848037 | 849020 | 327 | + | <a href="#">3572066</a> | COG0516F  | guanosine 5\'-monophosphate oxidoreductase       |  | * |
| M5005_Spy_0858  | xpt      | NE | 849325 | 849906 | 193 | + | <a href="#">3572067</a> | COG0503F  | xanthine phosphoribosyltransferase               |  | * |
| M5005_Spy_0859  | -        | NE | 849906 | 851189 | 427 | + | <a href="#">3572068</a> | COG2233F  | xanthine permease                                |  | * |
| M5005_Spy_0860c | apbE     | NE | 851253 | 852191 | 312 | - | <a href="#">3572030</a> | COG1477H  | thiamine biosynthesis lipoprotein                |  | * |
| M5005_Spy_0861c | -        | NE | 852244 | 852429 | 61  | - | <a href="#">3572031</a> | COG1942R  | 4-oxalocrotonate tautomerase                     |  | * |
| M5005_Spy_0862  | tdk2     | NE | 852567 | 853136 | 189 | + | <a href="#">3572032</a> | COG1435F  | thymidine kinase                                 |  | * |
| M5005_Spy_0863  | prfA     | E  | 853171 | 854250 | 359 | + | <a href="#">3572033</a> | COG0216J  | peptide chain release factor 1                   |  | * |
| M5005_Spy_0864  | hemK     | NE | 854250 | 855089 | 279 | + | <a href="#">3572034</a> | COG2890J  | methyltransferase                                |  | * |
| M5005_Spy_0865  | -        | NC | 855073 | 855663 | 196 | + | <a href="#">3572035</a> | COG0009J  | SUA5 protein                                     |  | * |
| M5005_Spy_0866  | -        | NE | 855681 | 856133 | 150 | + | <a href="#">3572036</a> | COG0456R  | phosphinothricin N-acetyltransferase             |  | * |
| M5005_Spy_0867  | glyA     | NE | 856123 | 857379 | 418 | + | <a href="#">3572037</a> | COG0112E  | serine hydroxymethyltransferase                  |  | * |
| M5005_Spy_0868  | -        | NE | 857386 | 858363 | 325 | + | <a href="#">3572038</a> | -         | hypothetical protein M5005_Spy_0868              |  | * |
| M5005_Spy_0869  | -        | NE | 858364 | 858963 | 199 | + | <a href="#">3572039</a> | COG0741M  | hypothetical protein M5005_Spy_0869              |  | * |
| M5005_Spy_0870  | -        | NE | 858973 | 860697 | 574 | + | <a href="#">3572040</a> | COG1132V  | protein/permease                                 |  | * |
| M5005_Spy_0871  | -        | NE | 860694 | 862421 | 575 | + | <a href="#">3572041</a> | COG1132V  | protein/permease                                 |  | * |
| M5005_Spy_0872  | nox      | NE | 862962 | 864032 | 356 | + | <a href="#">3572042</a> | COG0446R  | NADH oxidase H2O-forming                         |  | * |
| M5005_Spy_0873c | ldh      | NE | 864191 | 865174 | 327 | - | <a href="#">3572043</a> | COG0039C  | L-lactate dehydrogenase                          |  | * |
| M5005_Spy_0874  | gyrA     | E  | 865365 | 867851 | 828 | + | <a href="#">3572044</a> | COG0188L  | DNA gyrase subunit A                             |  | * |
| M5005_Spy_0875  | -        | E  | 867871 | 868620 | 249 | + | <a href="#">3572045</a> | COG3764M  | sortase                                          |  | * |
| M5005_Spy_0876  | -        | NE | 868700 | 869116 | 138 | + | <a href="#">3572046</a> | COG0346E  | lactoylglutathione lyase                         |  | * |
| M5005_Spy_0877  | -        | NC | 869603 | 869722 | 39  | + | <a href="#">3572047</a> | -         | hypothetical protein M5005_Spy_0877              |  | * |
| M5005_Spy_0878  | -        | NE | 869730 | 870098 | 122 | + | <a href="#">3572048</a> | -         | hypothetical protein M5005_Spy_0878              |  | * |
| M5005_Spy_0879c | -        | NE | 870148 | 871059 | 303 | - | <a href="#">3572010</a> | COG1597IR | hypothetical protein M5005_Spy_0879              |  | * |
| M5005_Spy_0880c | hlyIII   | C  | 871176 | 871826 | 216 | - | <a href="#">3572011</a> | COG1272R  | hypothetical protein M5005_Spy_0880              |  | * |
| M5005_Spy_0881c | -        | NE | 871823 | 872263 | 146 | - | <a href="#">3572012</a> | -         | hypothetical protein M5005_Spy_0881              |  | * |
| M5005_Spy_0882  | rbgA     | E  | 872482 | 873330 | 282 | + | <a href="#">3572013</a> | COG1161R  | ribosomal biogenesis GTPase                      |  | * |
| M5005_Spy_0883  | rnhB     | NE | 873320 | 874111 | 263 | + | <a href="#">3572014</a> | COG0164L  | ribonuclease HII                                 |  | * |
| M5005_Spy_0884  | smf      | NE | 874176 | 875012 | 278 | + | <a href="#">3572015</a> | COG0758LU | hypothetical protein M5005_Spy_0884              |  | * |
| M5005_Spy_0885  | topA     | C  | 875119 | 877248 | 709 | + | <a href="#">3572016</a> | COG0550L  | DNA topoisomerase I                              |  | * |
| M5005_Spy_0886c | -        | NE | 877323 | 877805 | 160 | - | <a href="#">3572017</a> | -         | LysR family transcriptional regulator            |  | * |
| M5005_Spy_0887c | -        | NC | 877812 | 877934 | 40  | - | <a href="#">3572018</a> | -         | LysR family transcriptional regulator            |  | * |
| M5005_Spy_0888c | -        | NC | 878080 | 878205 | 41  | - | <a href="#">3572019</a> | COG0583K  | LysR family transcriptional regulator            |  | * |

|                 |       |    |        |        |     |   |                         |            |                                                     |   |
|-----------------|-------|----|--------|--------|-----|---|-------------------------|------------|-----------------------------------------------------|---|
| M5005_Spy_0889  | -     | NE | 878218 | 878763 | 181 | + | <a href="#">3572020</a> | COG3641R   | regulatory protein (pfoS/R)                         |   |
| M5005_Spy_0890  | ddh   | NE | 878778 | 879770 | 330 | + | <a href="#">3572021</a> | COG1052CHR | D-lactate dehydrogenase                             |   |
| M5005_Spy_0891  | satD  | E  | 879875 | 880540 | 221 | + | <a href="#">3572022</a> | -          | hypothetical protein M5005_Spy_0891                 |   |
| M5005_Spy_0892  | satE  | NE | 880533 | 881249 | 238 | + | <a href="#">3572023</a> | -          | hypothetical protein M5005_Spy_0892                 |   |
| M5005_Spy_0893  | gid   | NC | 881400 | 882746 | 448 | + | <a href="#">3572024</a> | COG1206J   | tRNA (uracil-5-)-methyltransferase Gid              | * |
| M5005_Spy_0894  | oadA2 | NE | 882899 | 884305 | 468 | + | <a href="#">3572025</a> | COG5016C   | oxaloacetate decarboxylase                          |   |
| M5005_Spy_0895  | -     | NE | 884348 | 884662 | 104 | + | <a href="#">3572026</a> | -          | hypothetical protein M5005_Spy_0895                 |   |
| M5005_Spy_0896  | -     | NE | 884662 | 885012 | 116 | + | <a href="#">3572027</a> | COG4770I   | decarboxylase                                       |   |
| M5005_Spy_0897  | -     | NE | 885022 | 886152 | 376 | + | <a href="#">3572028</a> | COG1883C   | oxaloacetate decarboxylase subunit beta             |   |
| M5005_Spy_0898c | -     | NE | 886352 | 887236 | 294 | - | <a href="#">3572029</a> | COG1767H   | A synthase                                          |   |
| M5005_Spy_0899c | citG  | NE | 887229 | 887924 | 231 | - | <a href="#">3571991</a> | COG1802K   | GntR family transcriptional regulator               |   |
| M5005_Spy_0900c | -     | NE | 888082 | 889488 | 468 | - | <a href="#">3571992</a> | COG2851C   | Mg2+/citrate complex secondary transporter          |   |
| M5005_Spy_0901  | -     | NE | 889865 | 890188 | 107 | + | <a href="#">3571993</a> | -          | hypothetical protein M5005_Spy_0901                 |   |
| M5005_Spy_0902  | -     | NE | 890242 | 890640 | 132 | + | <a href="#">3571994</a> | COG0511I   | protein subunit                                     |   |
| M5005_Spy_0903  | oadB  | NE | 890685 | 891806 | 373 | + | <a href="#">3571995</a> | COG1883C   | oxaloacetate decarboxylase subunit beta             |   |
| M5005_Spy_0904  | -     | NC | 891824 | 891958 | 44  | + | <a href="#">3571996</a> | -          | hypothetical protein M5005_Spy_0904                 |   |
| M5005_Spy_0905  | citD  | NE | 891994 | 892302 | 102 | + | <a href="#">3571997</a> | COG3052C   | citrate lyase subunit gamma                         |   |
| M5005_Spy_0906  | citE  | NE | 892320 | 893177 | 285 | + | <a href="#">3571998</a> | COG2301G   | citrate lyase subunit beta/citryl-CoA lyase subunit |   |
| M5005_Spy_0907  | citF  | NC | 893180 | 894712 | 510 | + | <a href="#">3571999</a> | COG3051C   | citrate lyase subunit alpha/citrate CoA-transferase |   |
| M5005_Spy_0908  | citX  | NE | 894642 | 895283 | 213 | + | <a href="#">3572000</a> | COG3697HI  | A synthase                                          |   |
| M5005_Spy_0909  | oadA1 | NE | 895298 | 896692 | 464 | + | <a href="#">3572001</a> | COG5016C   | oxaloacetate decarboxylase                          |   |
| M5005_Spy_0910c | citC  | NE | 896802 | 897854 | 350 | - | <a href="#">3572002</a> | COG3053C   | (citrate (pro-3S)-lyase) ligase                     | * |
| M5005_Spy_0911c | -     | NE | 897943 | 898425 | 160 | - | <a href="#">3572003</a> | -          | hypothetical protein M5005_Spy_0911                 | * |
| M5005_Spy_0912  | -     | NC | 898910 | 899014 | 34  | + | <a href="#">3572004</a> | -          | hypothetical protein M5005_Spy_0912                 |   |
| M5005_Spy_0913c | xerS  | C  | 899125 | 900039 | 304 | - | <a href="#">3572005</a> | COG4974L   | site-specific tyrosine recombinase XerS             | * |
| M5005_Spy_0914  | -     | NE | 900733 | 901362 | 209 | + | <a href="#">3572006</a> | COG2932K   | phage transcriptional repressor                     | * |
| M5005_Spy_0915c | ffh   | E  | 901479 | 903041 | 520 | - | <a href="#">3572007</a> | COG0541U   | signal recognition particle subunit FFH/SRP54       | * |
| M5005_Spy_0916c | ylxM  | C  | 903056 | 903397 | 113 | - | <a href="#">3572008</a> | COG2739S   | DNA-binding protein                                 | * |
| M5005_Spy_0917c | -     | C  | 903486 | 904184 | 232 | - | <a href="#">3572009</a> | COG2188K   | GntR family transcriptional regulator               | * |
| M5005_Spy_0918c | -     | NE | 904267 | 905700 | 477 | - | <a href="#">3571971</a> | -          | hypothetical protein M5005_Spy_0918                 | * |
| M5005_Spy_0919  | guaA  | C  | 905867 | 907429 | 520 | + | <a href="#">3571972</a> | COG0519F   | GMP synthase                                        | * |
| M5005_Spy_0920c | murM2 | NE | 907471 | 908694 | 407 | - | <a href="#">3571973</a> | COG2348V   | alanyltransferase                                   |   |
| M5005_Spy_0921c | -     | NE | 909059 | 910603 | 514 | - | <a href="#">3571974</a> | COG0488R   | ABC transporter ATP-binding protein                 | * |
| M5005_Spy_0922c | pdxK  | NE | 910737 | 911294 | 185 | - | <a href="#">3571975</a> | COG4720S   | hypothetical protein M5005_Spy_0922                 | * |
| M5005_Spy_0923c | -     | NE | 911272 | 912138 | 288 | - | <a href="#">3571976</a> | COG2240H   | pyridoxamine kinase                                 | * |
| M5005_Spy_0924  | -     | NE | 912228 | 913496 | 422 | + | <a href="#">3571977</a> | COG1167KE  | GntR family transcriptional regulator               | * |
| M5005_Spy_0925c | rnhB  | NE | 913894 | 914250 | 118 | - | <a href="#">3571978</a> | COG1328F   | anaerobic ribonucleoside-triphosphate reductase     | * |
| M5005_Spy_0926c | -     | NC | 914572 | 916149 | 525 | - | <a href="#">3571979</a> | COG1502I   | cardiolipin synthetase                              | * |
| M5005_Spy_0927c | fhs.1 | E  | 916234 | 917904 | 556 | - | <a href="#">3571980</a> | COG2759F   | formate--tetrahydrofolate ligase                    | * |
| M5005_Spy_0928c | lplA  | NE | 918032 | 919051 | 339 | - | <a href="#">3571981</a> | COG0095H   | lipoate-protein ligase A                            | * |
| M5005_Spy_0929c | -     | NE | 919098 | 919979 | 293 | - | <a href="#">3571982</a> | COG0846K   | SIR2 family protein                                 | * |
| M5005_Spy_0930c | -     | NE | 919972 | 920784 | 270 | - | <a href="#">3571983</a> | COG2110R   | hypothetical protein M5005_Spy_0930                 | * |
| M5005_Spy_0931c | -     | NE | 920777 | 921109 | 110 | - | <a href="#">3571984</a> | COG0509E   | glycine cleavage system protein H                   | * |
| M5005_Spy_0932c | -     | NE | 921151 | 922149 | 332 | - | <a href="#">3571985</a> | COG2141C   | luciferase-like monooxygenase                       | * |
| M5005_Spy_0933c | -     | NE | 922146 | 923345 | 399 | - | <a href="#">3571986</a> | COG1902C   | NADH-dependent flavin oxidoreductase                | * |
| M5005_Spy_0934c | -     | NE | 923342 | 924178 | 278 | - | <a href="#">3571987</a> | COG0095H   | lipoate-protein ligase A                            | * |
| M5005_Spy_0935  | dpfB  | C  | 924374 | 925066 | 230 | + | <a href="#">3571988</a> | COG0452H   | phosphopantothenate--cysteine ligase                | * |
| M5005_Spy_0936  | dfp   | E  | 925059 | 925604 | 181 | + | <a href="#">3571989</a> | COG0452H   | phosphopantothenoylcysteine decarboxylase           | * |
| M5005_Spy_0937  | -     | NE | 925662 | 926231 | 189 | + | <a href="#">3571990</a> | COG4684S   | transporter                                         | * |
| M5005_Spy_0938  | pgmA  | E  | 926407 | 928125 | 572 | + | <a href="#">3571952</a> | COG1109G   | phosphoglucomutase/phosphomannomutase               | * |
| M5005_Spy_0939c | -     | NE | 928338 | 929294 | 318 | - | <a href="#">3571953</a> | COG1079R   | nucleoside transporter permease                     | * |
| M5005_Spy_0940c | -     | NE | 929296 | 930360 | 354 | - | <a href="#">3571954</a> | COG4603R   | nucleoside transporter permease                     | * |
| M5005_Spy_0941c | -     | NE | 930353 | 931903 | 516 | - | <a href="#">3571955</a> | COG3845R   | nucleoside transport ATP-binding protein            | * |
| M5005_Spy_0942c | -     | NE | 932024 | 933076 | 350 | - | <a href="#">3571956</a> | COG1744R   | nucleoside-binding protein                          | * |
| M5005_Spy_0943c | cdd   | NE | 933170 | 933559 | 129 | - | <a href="#">3571957</a> | COG0295F   | cytidine deaminase                                  | * |
| M5005_Spy_0944c | -     | NE | 934218 | 934805 | 195 | - | <a href="#">3571958</a> | COG2813J   | 16S rRNA m(2)G 1207 methyltransferase               | * |
| M5005_Spy_0945  | coaA  | E  | 935073 | 935993 | 306 | + | <a href="#">3571959</a> | COG1072H   | pantothenate kinase                                 | * |
| M5005_Spy_0946  | rpsT  | NE | 936062 | 936295 | 77  | + | <a href="#">3571960</a> | COG0268J   | 30S ribosomal protein S20                           | * |
| M5005_Spy_0947c | ciaH  | NE | 936420 | 937730 | 436 | - | <a href="#">3571961</a> | COG2205T   | sensor protein                                      | * |



|                 |       |    |        |        |      |   |                         |           |                                             |   |
|-----------------|-------|----|--------|--------|------|---|-------------------------|-----------|---------------------------------------------|---|
| M5005_Spy_0948c | ciaR  | NE | 937723 | 938397 | 224  | - | <a href="#">3571962</a> | COG0745TK | transcriptional regulatory protein          | * |
| M5005_Spy_0949c | pepN  | NE | 938743 | 941280 | 845  | - | <a href="#">3571963</a> | COG0308E  | lysyl aminopeptidase/alanine aminopeptidase | * |
| M5005_Spy_0950c | phoU  | NC | 941485 | 942138 | 217  | - | <a href="#">3571964</a> | COG0704P  | phosphate transporter protein               | * |
| M5005_Spy_0951c | pstB  | NE | 942206 | 942964 | 252  | - | <a href="#">3571965</a> | COG1117P  | phosphate transporter ATP-binding protein   | * |
| M5005_Spy_0952c | pstB2 | NE | 942977 | 943780 | 267  | - | <a href="#">3571966</a> | COG1117P  | phosphate transporter ATP-binding protein   | * |
| M5005_Spy_0953c | pstA  | NE | 943796 | 944683 | 295  | - | <a href="#">3571967</a> | COG0581P  | phosphate transporter permease              | * |
| M5005_Spy_0954c | pstC  | NC | 944673 | 945491 | 272  | - | <a href="#">3571968</a> | COG0573P  | phosphate transporter permease              | * |
| M5005_Spy_0955c | pstS  | NE | 945618 | 946484 | 288  | - | <a href="#">3571969</a> | COG0226P  | phosphate-binding protein                   | * |
| M5005_Spy_0956c | -     | E  | 946623 | 947933 | 436  | - | <a href="#">3571970</a> | COG0144J  | 16S rRNA m(5)C 967 methyltransferase        | * |
| M5005_Spy_0957c | -     | NE | 947936 | 948724 | 262  | - | <a href="#">3571932</a> | COG0483G  | myo-inositol-1(or 4)-monophosphatase        | * |
| M5005_Spy_0958c | -     | NE | 948714 | 948992 | 92   | - | <a href="#">3571933</a> | COG4476S  | hypothetical protein M5005_Spy_0958         | * |
| M5005_Spy_0959c | spxA  | NE | 948994 | 949398 | 134  | - | <a href="#">3571934</a> | COG1393P  | Spx family transcriptional regulator        | * |
| M5005_Spy_0960c | mreA  | E  | 949441 | 950373 | 310  | - | <a href="#">3571935</a> | COG0196H  | adenylyltransferase                         | * |
| M5005_Spy_0961c | truB  | NE | 950402 | 951286 | 294  | - | <a href="#">3571936</a> | COG0130J  | tRNA pseudouridine synthase B               | * |
| M5005_Spy_0962c | -     | NE | 951402 | 952742 | 446  | - | <a href="#">3571937</a> | COG4487S  | hypothetical protein M5005_Spy_0962         | * |
| M5005_Spy_0963c | -     | NE | 952839 | 953795 | 318  | - | <a href="#">3571938</a> | COG4129S  | hypothetical protein M5005_Spy_0963         | * |
| M5005_Spy_0964c | -     | NE | 953806 | 954402 | 198  | - | <a href="#">3571939</a> | COG0732V  | subunit                                     | * |
| M5005_Spy_0965c | -     | NE | 954494 | 955669 | 391  | - | <a href="#">3571940</a> | COG0577V  | ABC transporter permease                    | * |
| M5005_Spy_0967c | -     | NE | 957146 | 957847 | 233  | - | <a href="#">3571942</a> | COG1136V  | ABC transporter ATP-binding protein         | * |
| M5005_Spy_0968  | -     | NE | 957965 | 958507 | 180  | + | <a href="#">3571943</a> | COG1309K  | TetR family transcriptional regulator       | * |
| M5005_Spy_0969c | -     | NC | 958504 | 958647 | 47   | - | <a href="#">3571944</a> | -         | hypothetical protein M5005_Spy_0969         | * |
| M5005_Spy_0970c | -     | NE | 958650 | 959291 | 213  | - | <a href="#">3571945</a> | COG0490P  | component                                   | * |
| M5005_Spy_0971c | -     | NE | 959454 | 959942 | 162  | - | <a href="#">3571946</a> | COG1302S  | Gls24 family general stress protein         | * |
| M5005_Spy_0972c | -     | NE | 959953 | 960153 | 66   | - | <a href="#">3571947</a> | COG3237S  | hypothetical protein M5005_Spy_0972         | * |
| M5005_Spy_0973c | -     | NE | 960194 | 960733 | 179  | - | <a href="#">3571948</a> | COG1302S  | Gls24 family general stress protein         | * |
| M5005_Spy_0974c | -     | NC | 960746 | 960934 | 62   | - | <a href="#">3571949</a> | COG5547S  | small integral membrane protein             | * |
| M5005_Spy_0975c | -     | NE | 960945 | 961532 | 195  | - | <a href="#">3571950</a> | -         | hypothetical protein M5005_Spy_0975         | * |
| M5005_Spy_0976c | -     | NE | 961593 | 961799 | 68   | - | <a href="#">3571951</a> | COG2261S  | hypothetical protein M5005_Spy_0976         | * |
| M5005_Spy_0977c | pcrA  | C  | 962205 | 964523 | 772  | - | <a href="#">3571913</a> | COG0210L  | DNA helicase II                             | * |
| M5005_Spy_0978  | -     | NC | 964891 | 965061 | 56   | - | <a href="#">3571915</a> | COG1115E  | Na(+)-linked D-alanine glycine permease     | * |
| M5005_Spy_0979c | -     | C  | 965052 | 966374 | 440  | + | <a href="#">3571914</a> | -         | hypothetical protein M5005_Spy_0979         | * |
| M5005_Spy_0980  | -     | NE | 966494 | 967729 | 411  | + | <a href="#">3571916</a> | COG0053P  | cobalt-zinc-cadmium resistance protein      | * |
| M5005_Spy_0981c | cfa   | NE | 968098 | 968871 | 257  | - | <a href="#">3571917</a> | -         | cAMP factor                                 | * |
| M5005_Spy_0982c | -     | NE | 969241 | 970077 | 278  | - | <a href="#">3571918</a> | COG0834ET | histidine-binding protein                   | * |
| M5005_Spy_0983c | -     | NC | 970093 | 970722 | 209  | - | <a href="#">3571919</a> | COG1126E  | histidine transport ATP-binding protein     | * |
| M5005_Spy_0984c | -     | NE | 970732 | 971373 | 213  | - | <a href="#">3571920</a> | COG0765E  | histidine transporter permease              | * |
| M5005_Spy_0985c | -     | NE | 971479 | 971814 | 111  | - | <a href="#">3571921</a> | COG2824P  | phnA protein                                | * |
| M5005_Spy_0986c | glmS  | E  | 972010 | 973824 | 604  | - | <a href="#">3571922</a> | COG0449M  | aminotransferase                            | * |
| M5005_Spy_0987c | sipC  | NE | 974000 | 974557 | 185  | - | <a href="#">3571923</a> | COG0681U  | signal peptidase I                          | * |
| M5005_Spy_0988c | pyk   | E  | 974775 | 976277 | 500  | - | <a href="#">3571924</a> | COG0469G  | pyruvate kinase                             | * |
| M5005_Spy_0989c | pfkA  | E  | 976340 | 977353 | 337  | - | <a href="#">3571925</a> | COG0205G  | 6-phosphofructokinase                       | * |
| M5005_Spy_0990c | dnaE  | E  | 977433 | 980543 | 1036 | - | <a href="#">3571926</a> | COG0587L  | DNA polymerase III DnaE                     | * |
| M5005_Spy_0991  | -     | NC | 980728 | 981099 | 123  | + | <a href="#">3571927</a> | COG1725K  | GntR family transcriptional regulator       | * |
| M5005_Spy_0992  | -     | NE | 981099 | 981797 | 232  | + | <a href="#">3571928</a> | COG1131V  | ABC transporter ATP-binding protein         | * |
| M5005_Spy_0993  | -     | NE | 981807 | 982592 | 261  | + | <a href="#">3571929</a> | -         | ABC transporter permease                    | * |
| M5005_Spy_0994c | -     | C  | 982719 | 983333 | 204  | - | <a href="#">3571930</a> | COG0398S  | membrane-associated alkaline phosphatase    | * |
| M5005_Spy_0995c | -     | NE | 983924 | 984112 | 62   | - | <a href="#">3571931</a> | -         | phage protein                               | * |
| M5005_Spy_0996  | speA2 | NE | 984332 | 985087 | 251  | + | <a href="#">3571893</a> | -         | enterotoxin                                 | * |
| M5005_Spy_0997c | -     | NE | 985209 | 985868 | 219  | - | <a href="#">3571894</a> | -         | phage protein                               | * |
| M5005_Spy_0998c | -     | NE | 985868 | 986089 | 73   | - | <a href="#">3571895</a> | -         | phage protein                               | * |
| M5005_Spy_0999c | -     | NE | 986099 | 986872 | 257  | - | <a href="#">3571896</a> | -         | phage protein                               | * |
| M5005_Spy_1000c | -     | NE | 986883 | 987485 | 200  | - | <a href="#">3571897</a> | -         | phage protein                               | * |
| M5005_Spy_1001c | -     | NE | 987497 | 988261 | 254  | - | <a href="#">3571898</a> | -         | phage-associated cell wall hydrolase        | * |
| M5005_Spy_1002c | -     | NE | 988263 | 988595 | 110  | - | <a href="#">3571899</a> | -         | N-acetylmuramoyl-L-alanine amidase          | * |
| M5005_Spy_1003c | -     | NE | 988595 | 988963 | 122  | - | <a href="#">3571900</a> | -         | phage protein                               | * |
| M5005_Spy_1004c | -     | NC | 988932 | 989096 | 54   | - | <a href="#">3571901</a> | -         | phage protein                               | * |
| M5005_Spy_1005c | -     | NE | 989068 | 989415 | 115  | - | <a href="#">3571902</a> | -         | phage protein                               | * |
| M5005_Spy_1006c | -     | NE | 989426 | 991177 | 583  | - | <a href="#">3571903</a> | COG4675S  | phage structural protein                    | * |
| M5005_Spy_1007c | -     | NE | 991293 | 994733 | 1146 | - | <a href="#">3571904</a> | COG1705NU | phage protein                               | * |

|                 |       |    |         |         |     |   |                         |          |                                                     |
|-----------------|-------|----|---------|---------|-----|---|-------------------------|----------|-----------------------------------------------------|
| M5005_Spy_1008c | -     | NE | 994734  | 996218  | 494 | - | <a href="#">3571905</a> | COG4722S | hypothetical protein M5005_Spy_1008                 |
| M5005_Spy_1009c | -     | NE | 996219  | 998024  | 601 | - | <a href="#">3571906</a> | COG5412S | phage protein                                       |
| M5005_Spy_1010c | -     | NC | 998017  | 998475  | 152 | - | <a href="#">3571907</a> | -        | phage protein                                       |
| M5005_Spy_1011c | -     | NE | 998448  | 998765  | 105 | - | <a href="#">3571908</a> | -        | phage protein                                       |
| M5005_Spy_1012c | -     | NE | 998778  | 999284  | 168 | - | <a href="#">3571909</a> | COG5437S | antigen A                                           |
| M5005_Spy_1013c | -     | NE | 999296  | 999706  | 136 | - | <a href="#">3571910</a> | -        | antigen B                                           |
| M5005_Spy_1014c | -     | NE | 999708  | 1000103 | 131 | - | <a href="#">3571911</a> | -        | antigen C                                           |
| M5005_Spy_1015c | -     | NE | 1000100 | 1000411 | 103 | - | <a href="#">3571912</a> | -        | phage protein                                       |
| M5005_Spy_1016c | -     | NE | 1000408 | 1000752 | 114 | - | <a href="#">3571874</a> | -        | phage protein                                       |
| M5005_Spy_1017c | -     | NE | 1000766 | 1001059 | 97  | - | <a href="#">3571875</a> | -        | phage protein                                       |
| M5005_Spy_1018c | -     | NE | 1001072 | 1001962 | 296 | - | <a href="#">3571876</a> | -        | phage protein                                       |
| M5005_Spy_1019c | -     | NE | 1001981 | 1002550 | 189 | - | <a href="#">3571877</a> | -        | phage scaffold protein                              |
| M5005_Spy_1020c | -     | NE | 1002795 | 1003064 | 89  | - | <a href="#">3571878</a> | -        | phage protein                                       |
| M5005_Spy_1021c | -     | NE | 1003071 | 1003979 | 302 | - | <a href="#">3571879</a> | COG5585T | phage protein                                       |
| M5005_Spy_1022c | -     | NE | 1003948 | 1005273 | 441 | - | <a href="#">3571880</a> | -        | portal protein                                      |
| M5005_Spy_1023c | -     | NE | 1005273 | 1006547 | 424 | - | <a href="#">3571881</a> | COG1783R | terminase large subunit                             |
| M5005_Spy_1024c | -     | NE | 1006537 | 1006917 | 126 | - | <a href="#">3571882</a> | -        | phage protein                                       |
| M5005_Spy_1025c | -     | NE | 1007527 | 1007961 | 144 | - | <a href="#">3571883</a> | -        | ArpU family phage encoded transcriptional regulator |
| M5005_Spy_1026c | -     | NE | 1008247 | 1008513 | 88  | - | <a href="#">3571884</a> | -        | phage protein                                       |
| M5005_Spy_1027c | -     | NE | 1008510 | 1009034 | 174 | - | <a href="#">3571885</a> | -        | phage protein                                       |
| M5005_Spy_1028c | -     | NE | 1009037 | 1009669 | 210 | - | <a href="#">3571886</a> | COG0286V | phage protein                                       |
| M5005_Spy_1029c | -     | NE | 1009671 | 1009955 | 94  | - | <a href="#">3571887</a> | -        | phage protein                                       |
| M5005_Spy_1030c | -     | NE | 1009952 | 1010146 | 64  | - | <a href="#">3571888</a> | -        | phage protein                                       |
| M5005_Spy_1031c | -     | NE | 1010119 | 1010358 | 79  | - | <a href="#">3571889</a> | -        | phage protein                                       |
| M5005_Spy_1032c | -     | NE | 1010355 | 1010600 | 81  | - | <a href="#">3571890</a> | -        | phage protein                                       |
| M5005_Spy_1033c | -     | NE | 1010597 | 1010953 | 118 | - | <a href="#">3571891</a> | -        | phage protein                                       |
| M5005_Spy_1034c | -     | NE | 1010950 | 1011390 | 146 | - | <a href="#">3571892</a> | COG4570L | phage protein                                       |
| M5005_Spy_1035c | -     | NE | 1011390 | 1011593 | 67  | - | <a href="#">3571854</a> | -        | phage protein                                       |
| M5005_Spy_1036c | ssb2  | NE | 1011599 | 1012024 | 141 | - | <a href="#">3571855</a> | COG0629L | phage single-strand DNA binding protein             |
| M5005_Spy_1037c | ssb1  | NE | 1012017 | 1012691 | 224 | - | <a href="#">3571856</a> | -        | phage single-strand DNA binding protein             |
| M5005_Spy_1038c | -     | NE | 1012692 | 1013174 | 160 | - | <a href="#">3571857</a> | -        | phage protein                                       |
| M5005_Spy_1039c | -     | NE | 1013196 | 1013450 | 84  | - | <a href="#">3571858</a> | -        | phage protein                                       |
| M5005_Spy_1040c | -     | NE | 1013431 | 1013784 | 117 | - | <a href="#">3571859</a> | -        | phage protein                                       |
| M5005_Spy_1041c | -     | NC | 1013797 | 1013934 | 45  | - | <a href="#">3571860</a> | -        | phage protein                                       |
| M5005_Spy_1042c | -     | NC | 1013925 | 1014707 | 260 | - | <a href="#">3571861</a> | COG1484L | phage replication protein                           |
| M5005_Spy_1043c | -     | NE | 1014694 | 1015524 | 276 | - | <a href="#">3571862</a> | COG3935L | phage protein                                       |
| M5005_Spy_1044  | -     | NE | 1015738 | 1016199 | 153 | + | <a href="#">3571863</a> | -        | phage protein                                       |
| M5005_Spy_1045c | -     | NC | 1016649 | 1016849 | 66  | - | <a href="#">3571864</a> | COG1396K | transcriptional regulator                           |
| M5005_Spy_1046  | -     | NE | 1016923 | 1017309 | 128 | + | <a href="#">3571865</a> | -        | phage protein                                       |
| M5005_Spy_1047c | -     | NE | 1017298 | 1017507 | 69  | - | <a href="#">3571866</a> | -        | phage protein                                       |
| M5005_Spy_1048  | -     | NE | 1017561 | 1018160 | 199 | + | <a href="#">3571867</a> | -        | phage protein                                       |
| M5005_Spy_1049c | -     | NC | 1018190 | 1018348 | 52  | - | <a href="#">3571868</a> | -        | phage protein                                       |
| M5005_Spy_1050  | -     | C  | 1018705 | 1019529 | 274 | + | <a href="#">3571869</a> | COG2932K | phage transcriptional repressor                     |
| M5005_Spy_1051  | -     | NE | 1019565 | 1020458 | 297 | + | <a href="#">3571870</a> | -        | phage protein                                       |
| M5005_Spy_1052  | int.1 | NE | 1020579 | 1021667 | 362 | + | <a href="#">3571871</a> | COG4974L | integrase                                           |
| M5005_Spy_1053  | -     | NC | 1021799 | 1021912 | 37  | + | <a href="#">3571872</a> | -        | hypothetical protein M5005_Spy_1053                 |
| M5005_Spy_1054  | -     | NE | 1022030 | 1022650 | 206 | + | <a href="#">3571873</a> | -        | hypothetical protein M5005_Spy_1054                 |
| M5005_Spy_1055c | glgP  | NE | 1022907 | 1025171 | 754 | - | <a href="#">3571835</a> | COG0058G | glycogen phosphorylase                              |
| M5005_Spy_1056c | malM  | NE | 1025206 | 1026699 | 497 | - | <a href="#">3571836</a> | COG1640G | 4-alpha-glucanotransferase                          |
| M5005_Spy_1057c | malR  | NE | 1026814 | 1027833 | 339 | - | <a href="#">3571837</a> | COG1609K | LacI family transcriptional regulator               |
| M5005_Spy_1058  | malE  | NE | 1027874 | 1029325 | 483 | + | <a href="#">3571838</a> | COG2182G | maltose/maltodextrin-binding protein                |
| M5005_Spy_1059  | malF  | NE | 1029830 | 1030960 | 376 | + | <a href="#">3571839</a> | COG1175G | maltose ABC transporter permease                    |
| M5005_Spy_1060  | malG  | NE | 1030960 | 1031796 | 278 | + | <a href="#">3571840</a> | COG3833G | maltose ABC transporter permease                    |
| M5005_Spy_1061  | -     | NE | 1031951 | 1032751 | 266 | + | <a href="#">3571841</a> | COG1609K | LacI family transcriptional regulator               |
| M5005_Spy_1062c | malA  | NE | 1032867 | 1033682 | 271 | - | <a href="#">3571842</a> | COG5521S | maltodextrin utilization protein                    |
| M5005_Spy_1063c | malD  | NE | 1033704 | 1034564 | 286 | - | <a href="#">3571843</a> | COG3833G | maltodextrin transporter permease                   |
| M5005_Spy_1064c | malC  | NE | 1034561 | 1035868 | 435 | - | <a href="#">3571844</a> | COG1175G | maltose ABC transporter permease                    |
| M5005_Spy_1065c | amyA  | NE | 1035943 | 1038078 | 711 | - | <a href="#">3571845</a> | COG0366G | alpha-amylase                                       |
| M5005_Spy_1066c | amyB  | NE | 1038104 | 1039807 | 567 | - | <a href="#">3571846</a> | COG0366G | alpha-amylase                                       |

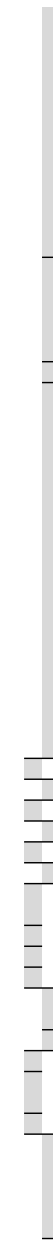

\*  
\*  
\*  
\*  
\*

|                 |        |    |         |         |     |   |                         |            |                                                    |   |
|-----------------|--------|----|---------|---------|-----|---|-------------------------|------------|----------------------------------------------------|---|
| M5005_Spy_1067c | malX   | NE | 1039973 | 1041232 | 419 | - | <a href="#">3571847</a> | COG2182G   | maltose/maltodextrin-binding protein               |   |
| M5005_Spy_1068  | -      | NE | 1041558 | 1041782 | 74  | + | <a href="#">3571848</a> | -          | transposase                                        |   |
| M5005_Spy_1069c | -      | NE | 1041847 | 1042830 | 327 | - | <a href="#">3571849</a> | COG0657I   | esterase                                           | * |
| M5005_Spy_1070c | dltD   | NE | 1042861 | 1044111 | 416 | - | <a href="#">3571850</a> | COG3966M   | hypothetical protein M5005_Spy_1070                | * |
| M5005_Spy_1071c | dltC   | NE | 1044104 | 1044343 | 79  | - | <a href="#">3571851</a> | COG02361Q  | D-alanine--poly(phosphoribitol) ligase subunit 2   |   |
| M5005_Spy_1072c | dltB   | NE | 1044361 | 1045617 | 418 | - | <a href="#">3571852</a> | COG1696M   | protein DltB                                       | * |
| M5005_Spy_1073c | dltA   | NE | 1045614 | 1047152 | 512 | - | <a href="#">3571853</a> | COG1020Q   | D-alanine--poly(phosphoribitol) ligase subunit 1   | * |
| M5005_Spy_1074c | -      | NC | 1047164 | 1047307 | 47  | - | <a href="#">3571815</a> | -          | hypothetical protein M5005_Spy_1074                |   |
| M5005_Spy_1075c | uvrB   | NE | 1047571 | 1049562 | 663 | - | <a href="#">3571816</a> | COG0556L   | excinuclease ABC subunit B                         | * |
| M5005_Spy_1076  | glnH   | E  | 1049755 | 1051929 | 724 | + | <a href="#">3571817</a> | COG0765E   | transporter                                        | * |
| M5005_Spy_1077  | glnQ.2 | NC | 1051929 | 1052669 | 246 | + | <a href="#">3571818</a> | COG1126E   | glutamine ABC transporter ATP-binding protein      | * |
| M5005_Spy_1078c | -      | NC | 1052817 | 1052969 | 50  | - | <a href="#">3571819</a> | -          | hypothetical protein M5005_Spy_1078                |   |
| M5005_Spy_1079c | -      | NE | 1052966 | 1054345 | 459 | - | <a href="#">3571820</a> | COG1455G   | IIC                                                |   |
| M5005_Spy_1080c | -      | NE | 1054523 | 1054972 | 149 | - | <a href="#">3571821</a> | -          | hypothetical protein M5005_Spy_1080                | * |
| M5005_Spy_1081c | -      | NE | 1054969 | 1055304 | 111 | - | <a href="#">3571822</a> | COG1447G   | IIA                                                | * |
| M5005_Spy_1082c | -      | NE | 1055307 | 1055618 | 103 | - | <a href="#">3571823</a> | COG1440G   | IIB                                                | * |
| M5005_Spy_1083c | -      | NC | 1055641 | 1057635 | 664 | - | <a href="#">3571824</a> | COG3711K   | component                                          | * |
| M5005_Spy_1084c | -      | NE | 1057741 | 1058835 | 364 | - | <a href="#">3571825</a> | COG3589S   | outer surface protein                              | * |
| M5005_Spy_1085c | bgIA.2 | NE | 1058844 | 1060244 | 466 | - | <a href="#">3571826</a> | COG2723G   | beta-glucosidase                                   | * |
| M5005_Spy_1086  | -      | NE | 1060469 | 1061164 | 231 | + | <a href="#">3571827</a> | COG3201H   | nicotinamide mononucleotide transporter            | * |
| M5005_Spy_1087c | -      | NC | 1061169 | 1061327 | 52  | - | <a href="#">3571828</a> | -          | hypothetical protein M5005_Spy_1087                | * |
| M5005_Spy_1088c | obgE   | E  | 1061396 | 1062703 | 435 | - | <a href="#">3571829</a> | COG0536R   | GTPase ObgE                                        | * |
| M5005_Spy_1089c | -      | NC | 1062766 | 1062894 | 42  | - | <a href="#">3571830</a> | -          | hypothetical protein M5005_Spy_1089                |   |
| M5005_Spy_1090  | -      | NE | 1063136 | 1063651 | 171 | + | <a href="#">3571831</a> | COG2963L   | transposase                                        | * |
| M5005_Spy_1091  | -      | NE | 1063824 | 1064480 | 218 | + | <a href="#">3571832</a> | COG2801L   | transposase                                        |   |
| M5005_Spy_1092c | rsuA   | NE | 1064529 | 1065263 | 244 | - | <a href="#">3571833</a> | COG1187J   | ribosomal small subunit pseudouridine synthase A   | * |
| M5005_Spy_1093  | -      | NE | 1065375 | 1065740 | 121 | + | <a href="#">3571834</a> | COG5496R   | hypothetical protein M5005_Spy_1093                | * |
| M5005_Spy_1094c | -      | NE | 1065860 | 1067080 | 406 | - | <a href="#">3571796</a> | COG2814G   | major facilitator transporter                      | * |
| M5005_Spy_1095  | -      | NE | 1067382 | 1068938 | 518 | + | <a href="#">3571797</a> | COG4868S   | hypothetical protein M5005_Spy_1095                | * |
| M5005_Spy_1096c | -      | NE | 1069045 | 1069446 | 133 | - | <a href="#">3571798</a> | COG2050Q   | thioesterase                                       | * |
| M5005_Spy_1097c | -      | NE | 1069531 | 1070043 | 170 | - | <a href="#">3571799</a> | COG2820F   | phosphorylase Pnp/Udp family protein               |   |
| M5005_Spy_1098c | -      | NE | 1070348 | 1071703 | 451 | - | <a href="#">3571800</a> | COG2265J   | tRNA (uracil-5-)-methyltransferase                 | * |
| M5005_Spy_1099c | psr    | NE | 1071785 | 1073236 | 483 | - | <a href="#">3571801</a> | COG1316K   | Lytr family transcriptional regulator              | * |
| M5005_Spy_1100c | aroK   | NE | 1073444 | 1073935 | 163 | - | <a href="#">3571802</a> | COG0703E   | shikimate kinase                                   | * |
| M5005_Spy_1101c | aroA1  | NE | 1073928 | 1075220 | 430 | - | <a href="#">3571803</a> | COG0128E   | 3-phosphoshikimate 1-carboxyvinyltransferase       | * |
| M5005_Spy_1102c | -      | NE | 1075322 | 1076287 | 321 | - | <a href="#">3571804</a> | COG1295S   | ribonuclease BN                                    | * |
| M5005_Spy_1103c | map    | E  | 1076289 | 1077149 | 286 | - | <a href="#">3571805</a> | COG0024J   | methionine aminopeptidase                          | * |
| M5005_Spy_1104c | -      | NE | 1077165 | 1078448 | 427 | - | <a href="#">3571806</a> | COG4109K   | hypothetical protein M5005_Spy_1104                | * |
| M5005_Spy_1105c | -      | NE | 1078457 | 1078999 | 180 | - | <a href="#">3571807</a> | COG1670J   | ribosomal-protein-alanine acetyltransferase        | * |
| M5005_Spy_1106c | grab   | NE | 1079237 | 1079890 | 217 | - | <a href="#">3571808</a> | COG2723G   | protein G-related alpha 2M-binding protein         |   |
| M5005_Spy_1107c | murZ   | NE | 1080248 | 1081507 | 419 | - | <a href="#">3571809</a> | COG0766M   | UDP-N-acetylglucosamine 1-carboxyvinyltransferase  | * |
| M5005_Spy_1108c | metK2  | E  | 1081681 | 1082877 | 398 | - | <a href="#">3571810</a> | COG0192H   | S-adenosylmethionine synthetase                    | * |
| M5005_Spy_1109c | inIA   | NE | 1083414 | 1085792 | 792 | - | <a href="#">3571811</a> | COG4886S   | internalin protein                                 | * |
| M5005_Spy_1110  | birA   | E  | 1085996 | 1086937 | 313 | + | <a href="#">3571812</a> | COG0340H   | biotin--protein ligase                             | * |
| M5005_Spy_1111c | -      | NE | 1086912 | 1087220 | 102 | - | <a href="#">3571813</a> | -          | hypothetical protein M5005_Spy_1111                |   |
| M5005_Spy_1112c | dnaX   | E  | 1087210 | 1088880 | 556 | - | <a href="#">3571814</a> | COG2812L   | DNA polymerase III subunits gamma/tau              |   |
| M5005_Spy_1113c | -      | NE | 1088880 | 1089377 | 165 | - | <a href="#">3571776</a> | COG1956T   | GAF domain-containing protein                      | * |
| M5005_Spy_1114  | -      | NE | 1089522 | 1090331 | 269 | + | <a href="#">3571777</a> | COG2339S   | hypothetical protein M5005_Spy_1114                | * |
| M5005_Spy_1115c | -      | NE | 1090384 | 1090647 | 87  | - | <a href="#">3571778</a> | COG3326S   | hypothetical protein M5005_Spy_1115                |   |
| M5005_Spy_1116c | udk    | NE | 1090727 | 1091353 | 208 | - | <a href="#">3571779</a> | COG0572F   | uridine kinase                                     | * |
| M5005_Spy_1117  | deaD2  | NE | 1091451 | 1092536 | 361 | + | <a href="#">3571780</a> | COG0513LKJ | ATP-dependent RNA helicase                         | * |
| M5005_Spy_1118c | -      | NE | 1092700 | 1093920 | 406 | - | <a href="#">3571781</a> | COG0726G   | peptidoglycan N-acetylglucosamine deacetylase      | * |
| M5005_Spy_1119c | gapN   | E  | 1094015 | 1095442 | 475 | - | <a href="#">3571782</a> | COG1012C   | dehydrogenase                                      |   |
| M5005_Spy_1120c | pstI   | C  | 1095627 | 1097360 | 577 | - | <a href="#">3571783</a> | COG1080G   | phosphoenolpyruvate-protein phosphotransferase     | * |
| M5005_Spy_1121c | ptsH   | C  | 1097365 | 1097628 | 87  | - | <a href="#">3571784</a> | COG1925G   | phosphocarrier protein HPr                         |   |
| M5005_Spy_1122  | nrhD   | NE | 1098021 | 1098239 | 72  | + | <a href="#">3571785</a> | COG0695O   | glutaredoxin                                       |   |
| M5005_Spy_1123  | nrhE.2 | NE | 1098259 | 1100419 | 719 | + | <a href="#">3571786</a> | COG0209F   | ribonucleotide-diphosphate reductase subunit alpha | * |
| M5005_Spy_1124  | nrhF   | NE | 1100751 | 1101710 | 319 | + | <a href="#">3571787</a> | COG0208F   | ribonucleotide-diphosphate reductase subunit beta  | * |
| M5005_Spy_1125  | -      | NE | 1101685 | 1102998 | 437 | + | <a href="#">3571788</a> | COG0038P   | chloride channel protein                           | * |

|                 |       |    |         |         |     |   |                         |            |                                                   |   |
|-----------------|-------|----|---------|---------|-----|---|-------------------------|------------|---------------------------------------------------|---|
| M5005_Spy_1129c | -     | NE | 1104384 | 1105079 | 231 | - | <a href="#">3571792</a> | COG1266R   | CAAX amino protease                               | * |
| M5005_Spy_1130c | -     | NE | 1105098 | 1105859 | 253 | - | <a href="#">3571793</a> | -          | hypothetical protein M5005_Spy_1130               | * |
| M5005_Spy_1131c | -     | NC | 1105856 | 1106077 | 73  | - | <a href="#">3571794</a> | COG1476K   | Cro/CI family transcriptional regulator           | * |
| M5005_Spy_1132c | alaS  | E  | 1106432 | 1109050 | 872 | - | <a href="#">3571795</a> | COG0013J   | alanyl-tRNA synthetase                            | * |
| M5005_Spy_1133c | prsA  | NE | 1109437 | 1110492 | 351 | - | <a href="#">3571757</a> | COG0760O   | foldase PrsA                                      | * |
| M5005_Spy_1134c | -     | NE | 1110555 | 1111262 | 235 | - | <a href="#">3571758</a> | COG4122R   | O-methyltransferase                               | * |
| M5005_Spy_1135c | -     | NE | 1111328 | 1112524 | 398 | - | <a href="#">3571759</a> | COG2271G   | oxalate/formate antiporter                        | * |
| M5005_Spy_1136c | pepB  | NE | 1112900 | 1114705 | 601 | - | <a href="#">3571760</a> | COG1164E   | oligoendopeptidase F                              | * |
| M5005_Spy_1137c | -     | NE | 1114718 | 1115680 | 320 | - | <a href="#">3571761</a> | COG4469R   | competence protein/transcription factor           | * |
| M5005_Spy_1138c | -     | NE | 1115975 | 1116691 | 238 | - | <a href="#">3571762</a> | COG1187J   | ribosomal small subunit pseudouridine synthase A  | * |
| M5005_Spy_1139c | nagB  | NE | 1116810 | 1117514 | 234 | - | <a href="#">3571763</a> | COG0363G   | glucosamine-6-phosphate isomerase                 | * |
| M5005_Spy_1140  | queA  | NE | 1117716 | 1118744 | 342 | + | <a href="#">3571764</a> | COG0809J   | isomerase                                         | * |
| M5005_Spy_1141  | -     | NE | 1118751 | 1119971 | 406 | + | <a href="#">3571765</a> | -          | hypothetical protein M5005_Spy_1141               | * |
| M5005_Spy_1142c | -     | NE | 1120085 | 1120675 | 196 | - | <a href="#">3571766</a> | COG1686M   | hypothetical protein M5005_Spy_1142               | * |
| M5005_Spy_1143c | -     | NE | 1120672 | 1120920 | 82  | - | <a href="#">3571767</a> | -          | hypothetical protein M5005_Spy_1143               | * |
| M5005_Spy_1144c | -     | NE | 1120905 | 1121132 | 75  | - | <a href="#">3571768</a> | -          | hypothetical protein M5005_Spy_1144               | * |
| M5005_Spy_1145c | sodA  | NE | 1121299 | 1121904 | 201 | - | <a href="#">3571769</a> | COG0605P   | superoxide dismutase                              | * |
| M5005_Spy_1146c | holA  | E  | 1122001 | 1123041 | 346 | - | <a href="#">3571770</a> | COG1466L   | DNA polymerase III subunit delta                  | * |
| M5005_Spy_1147c | comEC | NE | 1123112 | 1125355 | 747 | - | <a href="#">3571771</a> | COG2333R   | competence protein ComE                           | * |
| M5005_Spy_1148c | comE  | NE | 1125336 | 1125998 | 220 | - | <a href="#">3571772</a> | COG1555L   | competence protein ComE                           | * |
| M5005_Spy_1149c | -     | E  | 1126198 | 1126938 | 246 | - | <a href="#">3571773</a> | COG0204I   | 1-acyl-sn-glycerol-3-phosphate acyltransferase    | * |
| M5005_Spy_1150  | -     | NE | 1127056 | 1127832 | 258 | + | <a href="#">3571774</a> | COG4123R   | methyltransferase                                 | * |
| M5005_Spy_1151  | -     | NE | 1127822 | 1128100 | 92  | + | <a href="#">3571775</a> | COG2827L   | hypothetical protein M5005_Spy_1151               | * |
| M5005_Spy_1152c | kup   | NE | 1128124 | 1129107 | 327 | - | <a href="#">3571737</a> | COG3158P   | kup system potassium uptake protein, partial      | * |
| M5005_Spy_1154c | deaD  | NE | 1130251 | 1131870 | 539 | - | <a href="#">3571739</a> | COG0513LKJ | ATP-dependent RNA helicase                        | * |
| M5005_Spy_1155c | prfC  | NE | 1132177 | 1133721 | 514 | - | <a href="#">3571740</a> | COG4108J   | peptide chain release factor 3                    | * |
| M5005_Spy_1156c | -     | NE | 1133969 | 1134664 | 231 | - | <a href="#">3571741</a> | COG5522S   | hypothetical protein M5005_Spy_1156               | * |
| M5005_Spy_1157c | murF  | E  | 1134744 | 1136135 | 463 | - | <a href="#">3571742</a> | COG0770M   | alanyl-D-alanine ligase                           | * |
| M5005_Spy_1158c | ddl   | E  | 1136326 | 1137372 | 348 | - | <a href="#">3571743</a> | COG1181M   | D-alanyl-alanine synthetase A                     | * |
| M5005_Spy_1159c | recR  | NE | 1137473 | 1138069 | 198 | - | <a href="#">3571744</a> | COG0353L   | recombination protein RecR                        | * |
| M5005_Spy_1160c | -     | NE | 1138116 | 1138307 | 63  | - | <a href="#">3571745</a> | -          | penicillin-binding protein                        | * |
| M5005_Spy_1161c | fdhC  | NE | 1138868 | 1139647 | 259 | - | <a href="#">3571746</a> | COG2116P   | formate transporter                               | * |
| M5005_Spy_1162c | -     | NE | 1139771 | 1140313 | 180 | - | <a href="#">3571747</a> | -          | hypothetical protein M5005_Spy_1162               | * |
| M5005_Spy_1163c | -     | NE | 1140474 | 1140995 | 173 | - | <a href="#">3571748</a> | COG1827R   | biotin repressor family transcriptional regulator | * |
| M5005_Spy_1164c | gpmA  | NC | 1141102 | 1141797 | 231 | - | <a href="#">3571749</a> | COG0588G   | phosphoglyceromutase                              | * |
| M5005_Spy_1165  | pyrD  | NE | 1142036 | 1142971 | 311 | + | <a href="#">3571750</a> | COG0167F   | dihydroorotate dehydrogenase 1A                   | * |
| M5005_Spy_1166c | -     | NC | 1143026 | 1143199 | 57  | - | <a href="#">3571751</a> | -          | hypothetical protein M5005_Spy_1166               | * |
| M5005_Spy_1167c | -     | NE | 1143271 | 1145133 | 620 | - | <a href="#">3571752</a> | COG2217P   | ATPase                                            | * |
| M5005_Spy_1168c | -     | NC | 1145664 | 1145846 | 60  | - | <a href="#">3571753</a> | -          | phage protein                                     | * |
| M5005_Spy_1169  | spd3  | NE | 1146085 | 1146885 | 266 | + | <a href="#">3571754</a> | -          | streptodornase                                    | * |
| M5005_Spy_1170  | -     | NE | 1147096 | 1147590 | 164 | + | <a href="#">3571755</a> | -          | hypothetical protein M5005_Spy_1170               | * |
| M5005_Spy_1171c | -     | NE | 1147660 | 1148865 | 401 | - | <a href="#">3571756</a> | COG1705NU  | phage-associated cell wall hydrolase              | * |
| M5005_Spy_1172c | -     | NE | 1148981 | 1149208 | 75  | - | <a href="#">3571718</a> | COG5546S   | holin                                             | * |
| M5005_Spy_1173c | -     | NE | 1149205 | 1149480 | 91  | - | <a href="#">3571719</a> | -          | phage protein                                     | * |
| M5005_Spy_1174c | -     | NE | 1149490 | 1150107 | 205 | - | <a href="#">3571720</a> | -          | phage protein                                     | * |
| M5005_Spy_1175c | -     | NE | 1150104 | 1150541 | 145 | - | <a href="#">3571721</a> | -          | phage protein                                     | * |
| M5005_Spy_1176c | -     | NE | 1150553 | 1152421 | 622 | - | <a href="#">3571722</a> | COG4926S   | phage infection protein                           | * |
| M5005_Spy_1177c | -     | NE | 1152418 | 1153113 | 231 | - | <a href="#">3571723</a> | COG4722S   | phage protein                                     | * |
| M5005_Spy_1178c | -     | NE | 1153110 | 1155467 | 785 | - | <a href="#">3571724</a> | COG5412S   | phage protein                                     | * |
| M5005_Spy_1179c | -     | NE | 1155467 | 1155838 | 123 | - | <a href="#">3571725</a> | -          | phage protein                                     | * |
| M5005_Spy_1180c | -     | NE | 1155853 | 1156116 | 87  | - | <a href="#">3571726</a> | -          | phage protein                                     | * |
| M5005_Spy_1181c | -     | NE | 1156127 | 1156720 | 197 | - | <a href="#">3571727</a> | -          | major tail protein                                | * |
| M5005_Spy_1182c | -     | NE | 1156732 | 1157067 | 111 | - | <a href="#">3571728</a> | -          | phage protein                                     | * |
| M5005_Spy_1183c | -     | NE | 1157068 | 1157304 | 78  | - | <a href="#">3571729</a> | -          | phage protein                                     | * |
| M5005_Spy_1184c | -     | NE | 1157297 | 1157635 | 112 | - | <a href="#">3571730</a> | -          | phage protein                                     | * |
| M5005_Spy_1185c | -     | NE | 1157595 | 1158017 | 140 | - | <a href="#">3571731</a> | -          | phage protein                                     | * |
| M5005_Spy_1186c | -     | NE | 1158027 | 1158227 | 66  | - | <a href="#">3571732</a> | -          | phage protein                                     | * |
| M5005_Spy_1187c | -     | NE | 1158227 | 1159138 | 303 | - | <a href="#">3571733</a> | -          | phage structural protein                          | * |
| M5005_Spy_1188c | -     | NE | 1159163 | 1159624 | 153 | - | <a href="#">3571734</a> | -          | phage protein                                     | * |

|                 |          |    |         |         |     |   |                |           |                                                |   |
|-----------------|----------|----|---------|---------|-----|---|----------------|-----------|------------------------------------------------|---|
| M5005_Spy_1189c | -        | NE | 1159705 | 1161120 | 471 | - | <u>3571735</u> | COG4626R  | phage terminase                                |   |
| M5005_Spy_1190c | -        | NE | 1161230 | 1161496 | 88  | - | <u>3571736</u> | -         | phage protein                                  |   |
| M5005_Spy_1191c | -        | NE | 1161535 | 1161750 | 71  | - | <u>3571698</u> | -         | phage protein                                  |   |
| M5005_Spy_1192c | -        | NE | 1161719 | 1161952 | 77  | - | <u>3571699</u> | -         | phage protein                                  |   |
| M5005_Spy_1193c | -        | NE | 1161949 | 1163442 | 497 | - | <u>3571700</u> | -         | phage protein                                  |   |
| M5005_Spy_1194c | -        | NE | 1163435 | 1164703 | 422 | - | <u>3571701</u> | -         | phage protein                                  |   |
| M5005_Spy_1195c | -        | NE | 1164700 | 1165056 | 118 | - | <u>3571702</u> | -         | phage protein                                  |   |
| M5005_Spy_1196c | -        | NE | 1165205 | 1165549 | 114 | - | <u>3571703</u> | COG1403V  | HNH endonuclease                               |   |
| M5005_Spy_1197c | -        | NE | 1165658 | 1166077 | 139 | - | <u>3571704</u> | -         | phage protein                                  |   |
| M5005_Spy_1198c | -        | NE | 1166345 | 1166980 | 211 | - | <u>3571705</u> | COG0286V  | phage protein                                  |   |
| M5005_Spy_1199c | -        | NE | 1166982 | 1167251 | 89  | - | <u>3571706</u> | -         | phage protein                                  |   |
| M5005_Spy_1200c | -        | NE | 1167335 | 1167847 | 170 | - | <u>3571707</u> | -         | phage protein                                  |   |
| M5005_Spy_1201c | -        | NE | 1167844 | 1168257 | 137 | - | <u>3571708</u> | -         | phage protein                                  |   |
| M5005_Spy_1202c | -        | NC | 1168363 | 1168530 | 55  | - | <u>3571709</u> | -         | phage protein                                  |   |
| M5005_Spy_1203c | -        | NE | 1168540 | 1169337 | 265 | - | <u>3571710</u> | -         | phage protein                                  |   |
| M5005_Spy_1204c | -        | NE | 1169334 | 1170263 | 309 | - | <u>3571711</u> | COG3723L  | rect protein                                   |   |
| M5005_Spy_1205c | -        | NE | 1170266 | 1170595 | 109 | - | <u>3571712</u> | -         | phage protein                                  |   |
| M5005_Spy_1206c | -        | NE | 1170651 | 1170857 | 68  | - | <u>3571713</u> | -         | phage protein                                  |   |
| M5005_Spy_1207c | -        | NC | 1170866 | 1171006 | 46  | - | <u>3571714</u> | -         | phage protein                                  |   |
| M5005_Spy_1208c | -        | NE | 1171003 | 1171236 | 77  | - | <u>3571715</u> | -         | phage protein                                  |   |
| M5005_Spy_1209c | -        | NE | 1171217 | 1171606 | 129 | - | <u>3571716</u> | COG3935L  | DNA replication protein                        |   |
| M5005_Spy_1210c | -        | NE | 1171751 | 1171990 | 79  | - | <u>3571717</u> | -         | phage replication protein                      |   |
| M5005_Spy_1211c | -        | NC | 1172090 | 1172275 | 61  | - | <u>3571679</u> | -         | phage protein                                  |   |
| M5005_Spy_1212c | xis      | NE | 1172277 | 1172588 | 103 | - | <u>3571680</u> | -         | excisionase                                    |   |
| M5005_Spy_1213c | -        | NC | 1172666 | 1172851 | 61  | - | <u>3571681</u> | COG3655K  | phage protein                                  |   |
| M5005_Spy_1214  | -        | NE | 1173018 | 1173257 | 79  | + | <u>3571682</u> | -         | phage protein                                  |   |
| M5005_Spy_1215  | -        | NE | 1173399 | 1174205 | 268 | + | <u>3571683</u> | -         | phage protein                                  |   |
| M5005_Spy_1216c | -        | NE | 1174140 | 1174406 | 88  | - | <u>3571684</u> | -         | phage protein                                  |   |
| M5005_Spy_1217c | -        | NE | 1174438 | 1175154 | 238 | - | <u>3571685</u> | COG3645S  | phage antirepressor protein                    |   |
| M5005_Spy_1218c | -        | NE | 1175166 | 1175357 | 63  | - | <u>3571686</u> | -         | phage protein                                  |   |
| M5005_Spy_1219  | -        | E  | 1176511 | 1176858 | 115 | + | <u>3571687</u> | -         | Cro/CI family phage transcriptional regulator  |   |
| M5005_Spy_1220  | -        | NE | 1176862 | 1177242 | 126 | + | <u>3571688</u> | COG2856E  | phage protein                                  |   |
| M5005_Spy_1221  | -        | NE | 1177254 | 1177520 | 88  | + | <u>3571689</u> | -         | phage protein                                  |   |
| M5005_Spy_1222  | int.2    | NE | 1177644 | 1178786 | 380 | + | <u>3571690</u> | COG4974L  | integrase                                      |   |
| M5005_Spy_1223c | -        | NC | 1178876 | 1179151 | 91  | - | <u>3571691</u> | COG0776L  | DNA-binding protein HU                         | * |
| M5005_Spy_1224c | -        | NE | 1179250 | 1179837 | 195 | - | <u>3571692</u> | COG4698S  | hypothetical protein M5005_Spy_1224            | * |
| M5005_Spy_1225c | -        | NE | 1179815 | 1180657 | 280 | - | <u>3571693</u> | COG2755E  | lipase/acylhydrolase                           | * |
| M5005_Spy_1226c | -        | NE | 1180650 | 1181501 | 283 | - | <u>3571694</u> | COG1307S  | degV family protein                            | * |
| M5005_Spy_1227c | -        | NE | 1181717 | 1182658 | 313 | - | <u>3571695</u> | -         | hypothetical protein M5005_Spy_1227            | * |
| M5005_Spy_1228c | recN     | NE | 1182830 | 1184491 | 553 | - | <u>3571696</u> | COG0497L  | DNA repair protein                             | * |
| M5005_Spy_1229c | argR1    | NE | 1184513 | 1184983 | 156 | - | <u>3571697</u> | COG1438K  | arginine repressor ArgR                        | * |
| M5005_Spy_1230c | -        | NE | 1184970 | 1185797 | 275 | - | <u>3571659</u> | COG1189J  | hemolysin                                      | * |
| M5005_Spy_1231c | fps      | NE | 1185790 | 1186662 | 290 | - | <u>3571660</u> | COG0142H  | dimethylallyltransferase/geranyltransferase    | * |
| M5005_Spy_1232c | xseB     | NE | 1186662 | 1186877 | 71  | - | <u>3571661</u> | COG1722L  | exodeoxyribonuclease VII small subunit         | * |
| M5005_Spy_1233c | xseA     | NE | 1186855 | 1188195 | 446 | - | <u>3571662</u> | COG1570L  | exodeoxyribonuclease VII large subunit         | * |
| M5005_Spy_1234c | folD     | C  | 1188348 | 1189202 | 284 | - | <u>3571663</u> | COG0190H  | dehydrogenase/ 5,10-methylene-tetrahydrofolate | * |
| M5005_Spy_1235c | -        | NE | 1189410 | 1191113 | 567 | - | <u>3571664</u> | COG1109G  | phosphoglucomutase                             | * |
| M5005_Spy_1236c | phr      | NE | 1191282 | 1192691 | 469 | - | <u>3571665</u> | COG0415L  | deoxyribodipyrimidine photolyase               | * |
| M5005_Spy_1237c | artP/gtr | NE | 1192840 | 1193574 | 244 | - | <u>3571666</u> | COG1126E  | arginine transport ATP-binding protein         | * |
| M5005_Spy_1238c | artQ     | NE | 1193574 | 1194260 | 228 | - | <u>3571667</u> | COG0765E  | arginine transporter permease                  | * |
| M5005_Spy_1239c | -        | NC | 1194387 | 1194617 | 76  | - | <u>3571668</u> | COG4703S  | hypothetical protein M5005_Spy_1239            | * |
| M5005_Spy_1240  | clpE     | NE | 1194915 | 1197197 | 760 | + | <u>3571669</u> | COG0542O  | ATP-dependent Clp protease ATP-binding subunit | * |
| M5005_Spy_1241  | mutT     | NE | 1197325 | 1197780 | 151 | + | <u>3571670</u> | COG0494LR | 7,8-dihydro-8-oxoguanine-triphosphatase        | * |
| M5005_Spy_1242  | -        | NE | 1197831 | 1198133 | 100 | + | <u>3571671</u> | -         | hypothetical protein M5005_Spy_1242            | * |
| M5005_Spy_1243c | ileS     | E  | 1198398 | 1201199 | 933 | - | <u>3571672</u> | COG0060J  | isoleucyl-tRNA synthetase                      | * |
| M5005_Spy_1244c | divIVAS  | E  | 1201472 | 1202230 | 252 | - | <u>3571673</u> | COG3599D  | cell division initiation protein               | * |
| M5005_Spy_1245c | -        | NE | 1202240 | 1203031 | 263 | - | <u>3571674</u> | COG2302S  | RNA binding protein                            | * |
| M5005_Spy_1246c | -        | NC | 1203031 | 1203285 | 84  | - | <u>3571675</u> | COG0762S  | hypothetical protein M5005_Spy_1246            | * |
| M5005_Spy_1247c | -        | NE | 1203290 | 1203958 | 222 | - | <u>3571676</u> | COG1799S  | hypothetical protein M5005_Spy_1247            | * |



|                 |             |    |         |         |      |   |                         |           |                                                 |   |
|-----------------|-------------|----|---------|---------|------|---|-------------------------|-----------|-------------------------------------------------|---|
| M5005_Spy_1248c | -           | NE | 1203958 | 1204629 | 223  | - | <a href="#">3571677</a> | COG0325R  | pyridoxal-5'-phosphate family protein           | * |
| M5005_Spy_1249c | ftsZ        | E  | 1204632 | 1205951 | 439  | - | <a href="#">3571678</a> | COG0206D  | cell division protein FtsZ                      | * |
| M5005_Spy_1250c | ftsA        | E  | 1205975 | 1207339 | 454  | - | <a href="#">3571640</a> | COG0849D  | cell division protein                           | * |
| M5005_Spy_1251c | divIB/ftsQ  | NC | 1207551 | 1208699 | 382  | - | <a href="#">3571641</a> | COG1589M  | cell division protein                           | * |
| M5005_Spy_1252c | murG        | E  | 1208700 | 1209803 | 367  | - | <a href="#">3571642</a> | COG0707M  | N- acetylglucosaminyltransferase                | * |
| M5005_Spy_1253c | murD        | E  | 1209782 | 1211140 | 452  | - | <a href="#">3571643</a> | COG0771M  | synthetase                                      | * |
| M5005_Spy_1254c | -           | NE | 1211510 | 1211761 | 83   | - | <a href="#">3571644</a> | -         | hypothetical protein M5005_Spy_1254             | * |
| M5005_Spy_1255c | typA        | NC | 1211883 | 1213724 | 613  | - | <a href="#">3571645</a> | COG1217T  | GTP-binding protein                             | * |
| M5005_Spy_1256c | -           | NE | 1213907 | 1214296 | 129  | - | <a href="#">3571646</a> | COG0607P  | rhodanese-related sulfurtransferase             | * |
| M5005_Spy_1257c | glcK        | NE | 1214306 | 1215277 | 323  | - | <a href="#">3571647</a> | COG1940KG | glucokinase/xylose repressor                    | * |
| M5005_Spy_1258c | -           | NE | 1215282 | 1215485 | 67   | - | <a href="#">3571648</a> | COG4483S  | hypothetical protein M5005_Spy_1258             | * |
| M5005_Spy_1259c | dpr         | NE | 1215627 | 1216154 | 175  | - | <a href="#">3571649</a> | COG0783P  | like antioxidant protein                        | * |
| M5005_Spy_1260  | -           | NE | 1216382 | 1217008 | 208  | + | <a href="#">3571650</a> | COG2898S  | prepilin peptidase                              | * |
| M5005_Spy_1261c | -           | NE | 1217090 | 1218169 | 359  | - | <a href="#">3571651</a> | COG0820R  | ribosomal RNA large subunit methyltransferase N | * |
| M5005_Spy_1262c | -           | NE | 1218173 | 1218793 | 206  | - | <a href="#">3571652</a> | COG4470S  | transcriptional regulator                       | * |
| M5005_Spy_1263c | -           | NC | 1219088 | 1219207 | 39   | - | <a href="#">3571653</a> | -         | hypothetical protein M5005_Spy_1263             | * |
| M5005_Spy_1264c | -           | NE | 1219241 | 1219942 | 233  | - | <a href="#">3571654</a> | COG1609K  | ribose operon repressor, partial                | * |
| M5005_Spy_1265c | -           | NE | 1220035 | 1220265 | 76   | - | <a href="#">3571655</a> | COG1609K  | ribose operon repressor, partial                | * |
| M5005_Spy_1266c | -           | NE | 1220631 | 1221668 | 345  | - | <a href="#">3571656</a> | COG3480T  | ATP-dependent protease La                       | * |
| M5005_Spy_1267c | coaD        | E  | 1221655 | 1222146 | 163  | - | <a href="#">3571657</a> | COG0669H  | phosphopantetheine adenylyltransferase          | * |
| M5005_Spy_1268c | -           | NE | 1222136 | 1222675 | 179  | - | <a href="#">3571658</a> | COG0742L  | methyltransferase                               | * |
| M5005_Spy_1269c | asnA        | NE | 1222798 | 1223790 | 330  | - | <a href="#">3571620</a> | COG2502E  | asparagine synthetase AsnA                      | * |
| M5005_Spy_1270c | arcC        | NE | 1224103 | 1225053 | 316  | - | <a href="#">3571621</a> | COG0549E  | carbamate kinase                                | * |
| M5005_Spy_1271c | -           | NE | 1225073 | 1226404 | 443  | - | <a href="#">3571622</a> | COG0624E  | hypothetical protein M5005_Spy_1271             | * |
| M5005_Spy_1272c | -           | NE | 1226421 | 1227914 | 497  | - | <a href="#">3571623</a> | COG1288S  | arginine/ornithine antiporter                   | * |
| M5005_Spy_1273c | arcB        | NE | 1228084 | 1229097 | 337  | - | <a href="#">3571624</a> | COG0078E  | ornithine carbamoyltransferase                  | * |
| M5005_Spy_1274c | -           | NE | 1229137 | 1229565 | 142  | - | <a href="#">3571625</a> | COG2153R  | acetyltransferase                               | * |
| M5005_Spy_1275c | arcA        | NE | 1229665 | 1230900 | 411  | - | <a href="#">3571626</a> | COG2235E  | arginine deiminase                              | * |
| M5005_Spy_1276c | -           | NE | 1231174 | 1231854 | 226  | - | <a href="#">3571627</a> | COG0664T  | Crp/Fnr family transcriptional regulator        | * |
| M5005_Spy_1277  | ahrC.2/argR | NE | 1231996 | 1232469 | 157  | + | <a href="#">3571628</a> | COG1438K  | arginine repressor ArgR                         | * |
| M5005_Spy_1278c | -           | NE | 1232635 | 1233351 | 238  | - | <a href="#">3571629</a> | COG3382S  | hypothetical protein M5005_Spy_1278             | * |
| M5005_Spy_1279c | -           | NE | 1233365 | 1234444 | 359  | - | <a href="#">3571630</a> | COG2315S  | hypothetical protein M5005_Spy_1279             | * |
| M5005_Spy_1280c | yesM        | NC | 1234517 | 1236250 | 577  | - | <a href="#">3571631</a> | COG2972T  | two-component sensor kinase                     | * |
| M5005_Spy_1281c | yesN        | NE | 1236247 | 1236987 | 246  | - | <a href="#">3571632</a> | COG4753T  | two-component response regulator                | * |
| M5005_Spy_1282c | msrA        | NE | 1237075 | 1238181 | 368  | - | <a href="#">3571633</a> | COG0225O  | bifunctional methionine sulfoxide reductase A/B | * |
| M5005_Spy_1283c | tlpA        | NE | 1238224 | 1238847 | 207  | - | <a href="#">3571634</a> | COG1225O  | thiol:disulfide interchange protein             | * |
| M5005_Spy_1284c | ccdA        | NE | 1238860 | 1239570 | 236  | - | <a href="#">3571635</a> | COG0785O  | cytochrome C biogenesis protein                 | * |
| M5005_Spy_1285c | -           | NE | 1240173 | 1240466 | 97   | - | <a href="#">3571636</a> | COG1343L  | hypothetical protein M5005_Spy_1285             | * |
| M5005_Spy_1286c | -           | NE | 1240477 | 1241502 | 341  | - | <a href="#">3571637</a> | COG1518L  | DNA polymerase                                  | * |
| M5005_Spy_1287c | -           | NE | 1241499 | 1242173 | 224  | - | <a href="#">3571638</a> | COG1468L  | hypothetical protein M5005_Spy_1287             | * |
| M5005_Spy_1288c | -           | NE | 1242175 | 1243023 | 282  | - | <a href="#">3571639</a> | COG3649L  | hypothetical protein M5005_Spy_1288             | * |
| M5005_Spy_1289c | -           | NE | 1243028 | 1244923 | 631  | - | <a href="#">3571602</a> | -         | hypothetical protein M5005_Spy_1289             | * |
| M5005_Spy_1290c | -           | NE | 1244923 | 1245651 | 242  | - | <a href="#">3571603</a> | -         | hypothetical protein M5005_Spy_1290             | * |
| M5005_Spy_1291c | -           | NE | 1245784 | 1248186 | 800  | - | <a href="#">3571604</a> | COG1203R  | ATP-dependent RNA helicase                      | * |
| M5005_Spy_1292c | valS        | E  | 1248346 | 1250751 | 801  | - | <a href="#">3571605</a> | COG0525J  | valyl-tRNA synthetase                           | * |
| M5005_Spy_1293c | -           | NE | 1250995 | 1251558 | 187  | - | <a href="#">3571606</a> | COG0563F  | hypothetical protein M5005_Spy_1293             | * |
| M5005_Spy_1294c | -           | NC | 1251555 | 1251734 | 59   | - | <a href="#">3571607</a> | COG1670J  | ribosomal-protein-serine acetyltransferase      | * |
| M5005_Spy_1295c | -           | NE | 1252159 | 1252554 | 131  | - | <a href="#">3571608</a> | -         | hypothetical protein M5005_Spy_1295             | * |
| M5005_Spy_1296c | -           | NE | 1252572 | 1252826 | 84   | - | <a href="#">3571609</a> | -         | hypothetical protein M5005_Spy_1296             | * |
| M5005_Spy_1297  | aroA2       | NE | 1253305 | 1254057 | 250  | + | <a href="#">3571611</a> | COG2876E  | 3-deoxy-7-phosphoheptulonate synthase           | * |
| M5005_Spy_1298  | aroB        | NE | 1254113 | 1255186 | 357  | + | <a href="#">3571612</a> | COG0337E  | 3-dehydroquininate synthase                     | * |
| M5005_Spy_1299c | -           | NE | 1255455 | 1255613 | 52   | - | <a href="#">3571613</a> | -         | hypothetical protein M5005_Spy_1299             | * |
| M5005_Spy_1300c | -           | NE | 1255621 | 1255926 | 101  | - | <a href="#">3571614</a> | COG1917S  | hypothetical protein M5005_Spy_1300             | * |
| M5005_Spy_1301c | -           | NE | 1255928 | 1256266 | 112  | - | <a href="#">3571615</a> | COG1917S  | hypothetical protein M5005_Spy_1301             | * |
| M5005_Spy_1302c | -           | NE | 1256319 | 1257074 | 251  | - | <a href="#">3571616</a> | COG2226H  | SAM-dependent methyltransferase                 | * |
| M5005_Spy_1303c | aroE        | NE | 1257309 | 1258187 | 292  | - | <a href="#">3571617</a> | COG0169E  | shikimate 5-dehydrogenase                       | * |
| M5005_Spy_1304c | lacZ        | NE | 1258325 | 1261741 | 1138 | - | <a href="#">3571618</a> | COG3250G  | beta-galactosidase                              | * |
| M5005_Spy_1305c | trxR        | NE | 1261761 | 1263245 | 494  | - | <a href="#">3571619</a> | COG4753T  | two-component response regulator                | * |
| M5005_Spy_1306c | trxS        | NE | 1263245 | 1264969 | 574  | - | <a href="#">3571583</a> | COG2972T  | two-component sensor kinase                     | * |

|                 |        |    |         |         |     |   |                         |            |                                              |   |
|-----------------|--------|----|---------|---------|-----|---|-------------------------|------------|----------------------------------------------|---|
| M5005_Spy_1307c | trxT   | NE | 1264959 | 1265564 | 201 | - | <a href="#">3571584</a> | COG5578S   | hypothetical protein M5005_Spy_1307          | * |
| M5005_Spy_1308c | -      | NE | 1265870 | 1267315 | 481 | - | <a href="#">3571585</a> | COG1653G   | sugar-binding protein                        | * |
| M5005_Spy_1309c | -      | NE | 1267396 | 1268322 | 308 | - | <a href="#">3571586</a> | COG0395G   | sugar transporter permease                   | * |
| M5005_Spy_1310c | -      | NE | 1268332 | 1269282 | 316 | - | <a href="#">3571587</a> | COG4209G   | sugar transporter permease                   | * |
| M5005_Spy_1311  | -      | NE | 1269478 | 1270356 | 292 | + | <a href="#">3571588</a> | COG1940KG  | glucokinase                                  | * |
| M5005_Spy_1312  | -      | NC | 1270500 | 1270622 | 40  | + | <a href="#">3571589</a> | -          | hypothetical protein M5005_Spy_1312          | * |
| M5005_Spy_1313c | -      | NE | 1270968 | 1272410 | 480 | - | <a href="#">3571590</a> | COG2723G   | beta-glucosidase                             | * |
| M5005_Spy_1314c | hyl    | NE | 1272434 | 1274128 | 564 | - | <a href="#">3571591</a> | -          | hyaluronoglucosaminidase                     | * |
| M5005_Spy_1315c | -      | NE | 1274179 | 1275219 | 346 | - | <a href="#">3571592</a> | COG1609K   | GntR family transcriptional regulator        | * |
| M5005_Spy_1316  | -      | NE | 1275352 | 1276638 | 428 | + | <a href="#">3571593</a> | COG3538S   | hypothetical protein M5005_Spy_1316          | * |
| M5005_Spy_1317  | -      | NE | 1276653 | 1279358 | 901 | + | <a href="#">3571594</a> | COG0383G   | alpha-mannosidase                            | * |
| M5005_Spy_1318c | rocA   | NE | 1279459 | 1280814 | 451 | - | <a href="#">3571595</a> | COG2972T   | sensory transduction protein kinase          | * |
| M5005_Spy_1319c | -      | NE | 1281479 | 1282834 | 451 | - | <a href="#">3571596</a> | COG2265J   | tRNA (uracil-5-)-methyltransferase           | * |
| M5005_Spy_1320  | recX   | NE | 1282949 | 1283725 | 258 | + | <a href="#">3571597</a> | COG2137R   | recombination regulator RecX                 | * |
| M5005_Spy_1321  | -      | C  | 1283805 | 1284338 | 177 | + | <a href="#">3571598</a> | COG3557J   | hypothetical protein M5005_Spy_1321          | * |
| M5005_Spy_1322c | -      | NC | 1284437 | 1284586 | 49  | - | <a href="#">3571599</a> | -          | hypothetical protein M5005_Spy_1322          | * |
| M5005_Spy_1323  | -      | NE | 1284708 | 1284986 | 92  | + | <a href="#">3571600</a> | -          | transposase                                  | * |
| M5005_Spy_1324  | -      | NC | 1291239 | 1291373 | 44  | + | <a href="#">3571555</a> | -          | hypothetical protein M5005_Spy_1324          | * |
| M5005_Spy_1325c | -      | NE | 1292030 | 1292578 | 182 | - | <a href="#">3571556</a> | COG1544J   | ribosome-associated factor Y                 | * |
| M5005_Spy_1326c | comFC  | NE | 1292658 | 1293323 | 221 | - | <a href="#">3571557</a> | COG1040R   | competence protein ComF                      | * |
| M5005_Spy_1327c | comFA  | NE | 1293295 | 1294509 | 404 | - | <a href="#">3571558</a> | COG4098L   | competence protein ComF                      | * |
| M5005_Spy_1328  | -      | NE | 1294676 | 1295308 | 210 | + | <a href="#">3571559</a> | COG1739S   | Xaa-Pro dipeptidase                          | * |
| M5005_Spy_1329  | cysM   | NE | 1295436 | 1296377 | 313 | + | <a href="#">3571560</a> | COG0031E   | cysteine synthase                            | * |
| M5005_Spy_1330c | -      | C  | 1296395 | 1296772 | 125 | - | <a href="#">3571561</a> | COG1098J   | hypothetical protein M5005_Spy_1330          | * |
| M5005_Spy_1331c | -      | NE | 1296772 | 1298172 | 466 | - | <a href="#">3571562</a> | COG0652O   | peptidyl-prolyl cis-trans isomerase          | * |
| M5005_Spy_1332c | yvqC   | NC | 1298209 | 1298850 | 213 | - | <a href="#">3571563</a> | COG2197TK  | two-component response regulator             | * |
| M5005_Spy_1333c | yvqE   | NE | 1298843 | 1299847 | 334 | - | <a href="#">3571564</a> | COG4585T   | two-component sensor protein                 | * |
| M5005_Spy_1334c | yvqF   | NE | 1299844 | 1300536 | 230 | - | <a href="#">3571565</a> | COG4758S   | transporter                                  | * |
| M5005_Spy_1335c | -      | E  | 1300659 | 1302557 | 632 | - | <a href="#">3571566</a> | COG2815S   | serine/threonine protein kinase              | * |
| M5005_Spy_1336c | pppL   | E  | 1302554 | 1303294 | 246 | - | <a href="#">3571567</a> | COG0631T   | protein phosphatase 2C                       | * |
| M5005_Spy_1337c | sunL   | NE | 1303332 | 1304654 | 440 | - | <a href="#">3571568</a> | COG0144J   | 16S rRNA m(5)C 967 methyltransferase         | * |
| M5005_Spy_1338c | fmt    | E  | 1304644 | 1305579 | 311 | - | <a href="#">3571569</a> | COG0223J   | methionyl-tRNA formyltransferase             | * |
| M5005_Spy_1339c | priA   | C  | 1305641 | 1308025 | 794 | - | <a href="#">3571570</a> | COG1198L   | primosome assembly protein PriA              | * |
| M5005_Spy_1340c | -      | NE | 1308090 | 1308407 | 105 | - | <a href="#">3571571</a> | COG1758K   | DNA-directed RNA polymerase subunit omega    | * |
| M5005_Spy_1341c | gmk    | E  | 1308423 | 1309058 | 211 | - | <a href="#">3571572</a> | COG0194F   | guanylate kinase                             | * |
| M5005_Spy_1342c | -      | NC | 1309168 | 1310775 | 535 | - | <a href="#">3571535</a> | COG1418R   | hypothetical protein M5005_Spy_1342          | * |
| M5005_Spy_1343c | -      | NE | 1310905 | 1311801 | 298 | - | <a href="#">3571536</a> | COG0583K   | LysR family transcriptional regulator        | * |
| M5005_Spy_1344  | atoB   | NE | 1312003 | 1313190 | 395 | + | <a href="#">3571537</a> | COG0183I   | acetyl-CoA acetyltransferase                 | * |
| M5005_Spy_1345  | atoD.1 | NE | 1313214 | 1313864 | 216 | + | <a href="#">3571538</a> | COG1788I   | acetate CoA-transferase subunit alpha        | * |
| M5005_Spy_1346  | atoA   | NE | 1313866 | 1314525 | 219 | + | <a href="#">3571539</a> | COG2057I   | acetate CoA-transferase subunit beta         | * |
| M5005_Spy_1347  | -      | NE | 1314558 | 1315337 | 259 | + | <a href="#">3571540</a> | COG1028IQR | 3-hydroxybutyrate dehydrogenase              | * |
| M5005_Spy_1348  | -      | NE | 1315408 | 1316739 | 443 | + | <a href="#">3571541</a> | COG2610GE  | D-beta-hydroxybutyrate permease              | * |
| M5005_Spy_1349  | luxS   | NE | 1316723 | 1317295 | 190 | + | <a href="#">3571542</a> | COG1854T   | S-ribosylhomocysteinase                      | * |
| M5005_Spy_1350c | -      | NE | 1317440 | 1318909 | 489 | - | <a href="#">3571543</a> | -          | hypothetical protein M5005_Spy_1350          | * |
| M5005_Spy_1351c | -      | NE | 1318923 | 1320077 | 384 | - | <a href="#">3571544</a> | COG0116L   | methyltransferase                            | * |
| M5005_Spy_1352c | -      | NC | 1320522 | 1320848 | 108 | - | <a href="#">3571545</a> | COG3599D   | cell division initiation protein             | * |
| M5005_Spy_1353c | -      | NE | 1320970 | 1321485 | 171 | - | <a href="#">3571546</a> | COG4474S   | hypothetical protein M5005_Spy_1353          | * |
| M5005_Spy_1354  | recU   | NE | 1321566 | 1322165 | 199 | + | <a href="#">3571547</a> | COG3331R   | Holliday junction-specific endonuclease      | * |
| M5005_Spy_1355  | pbp1A  | E  | 1322152 | 1324317 | 721 | + | <a href="#">3571548</a> | COG0744M   | multimodular transpeptidase-transglycosylase | * |
| M5005_Spy_1356c | pepC   | NE | 1324784 | 1326121 | 445 | - | <a href="#">3571549</a> | COG3579E   | aminopeptidase                               | * |
| M5005_Spy_1357c | nadE   | E  | 1326306 | 1327130 | 274 | - | <a href="#">3571550</a> | COG0171H   | NAD synthetase                               | * |
| M5005_Spy_1358c | nadE   | E  | 1327132 | 1328586 | 484 | - | <a href="#">3571551</a> | COG1488H   | nicotinate phosphoribosyltransferase         | * |
| M5005_Spy_1359c | -      | NE | 1328757 | 1330136 | 459 | - | <a href="#">3571552</a> | COG1113E   | amino acid permease                          | * |
| M5005_Spy_1360c | -      | C  | 1330305 | 1331222 | 305 | - | <a href="#">3571553</a> | COG0492O   | thioredoxin reductase                        | * |
| M5005_Spy_1361c | aapA   | E  | 1331286 | 1331510 | 74  | - | <a href="#">3571554</a> | -          | hypothetical protein M5005_Spy_1361          | * |
| M5005_Spy_1362c | -      | NE | 1331614 | 1332360 | 248 | - | <a href="#">3571516</a> | COG1126E   | transporter                                  | * |
| M5005_Spy_1363c | -      | NE | 1332357 | 1333160 | 267 | - | <a href="#">3571517</a> | COG0765E   | amino acid ABC transporter permease          | * |
| M5005_Spy_1364c | -      | E  | 1333355 | 1334698 | 447 | - | <a href="#">3571518</a> | COG0513LKJ | ATP-dependent RNA helicase                   | * |
| M5005_Spy_1365c | mraY   | E  | 1334856 | 1335866 | 336 | - | <a href="#">3571519</a> | COG0472M   | transferase                                  | * |

|                 |        |    |         |         |     |   |                         |           |                                              |   |
|-----------------|--------|----|---------|---------|-----|---|-------------------------|-----------|----------------------------------------------|---|
| M5005_Spy_1366c | ftsI   | E  | 1335868 | 1338123 | 751 | - | <a href="#">3571520</a> | COG0768M  | protein ftsI                                 | * |
| M5005_Spy_1367c | ftsL   | E  | 1338127 | 1338450 | 107 | - | <a href="#">3571521</a> | COG4839D  | cell division protein                        | * |
| M5005_Spy_1368c | mraW   | C  | 1338455 | 1339468 | 337 | - | <a href="#">3571522</a> | COG0275M  | S-adenosyl-methyltransferase MraW            | * |
| M5005_Spy_1369c | -      | NC | 1339492 | 1339599 | 35  | - | <a href="#">3571523</a> | -         | hypothetical protein M5005_Spy_1369          |   |
| M5005_Spy_1370c | proA   | NE | 1339942 | 1341192 | 416 | - | <a href="#">3571524</a> | COG0014E  | gamma-glutamyl phosphate reductase           |   |
| M5005_Spy_1371c | proB   | NE | 1341185 | 1342006 | 273 | - | <a href="#">3571525</a> | COG0263E  | gamma-glutamyl kinase                        |   |
| M5005_Spy_1372c | proB   | NE | 1342071 | 1343699 | 542 | - | <a href="#">3571526</a> | COG1269C  | ABC transporter permease                     | * |
| M5005_Spy_1373c | -      | NE | 1343704 | 1344438 | 244 | - | <a href="#">3571527</a> | COG1131V  | ABC transporter ATP-binding protein          | * |
| M5005_Spy_1374c | -      | NE | 1344472 | 1344738 | 88  | - | <a href="#">3571528</a> | -         | hypothetical protein M5005_Spy_1374          |   |
| M5005_Spy_1375c | tkk    | NE | 1344931 | 1346916 | 661 | - | <a href="#">3571529</a> | COG0021G  | transketolase                                | * |
| M5005_Spy_1376c | tal    | NE | 1347134 | 1347778 | 214 | - | <a href="#">3571530</a> | COG0176G  | transaldolase                                | * |
| M5005_Spy_1377c | -      | NE | 1347904 | 1349403 | 499 | - | <a href="#">3571531</a> | COG3711K  | trans-acting positive regulator              |   |
| M5005_Spy_1378c | npX    | NE | 1349393 | 1350739 | 448 | - | <a href="#">3571532</a> | COG0446R  | NADH peroxidase                              |   |
| M5005_Spy_1379c | glpF   | NE | 1350848 | 1351549 | 233 | - | <a href="#">3571533</a> | COG0580G  | glycerol uptake facilitator protein          | * |
| M5005_Spy_1380c | glpO   | NE | 1351551 | 1353389 | 612 | - | <a href="#">3571534</a> | COG0578C  | alpha-glycerophosphate oxidase               |   |
| M5005_Spy_1381c | glpK   | NE | 1353405 | 1354931 | 508 | - | <a href="#">3571496</a> | COG0554C  | glycerol kinase                              | * |
| M5005_Spy_1382c | -      | NE | 1355292 | 1355684 | 130 | - | <a href="#">3571497</a> | COG3212S  | hypothetical protein M5005_Spy_1382          | * |
| M5005_Spy_1383c | -      | NC | 1355811 | 1356068 | 85  | - | <a href="#">3571498</a> | COG4224S  | hypothetical protein M5005_Spy_1383          |   |
| M5005_Spy_1384c | glyS   | E  | 1356222 | 1358261 | 679 | - | <a href="#">3571499</a> | COG0751J  | glycyl-tRNA synthetase subunit beta          | * |
| M5005_Spy_1385c | glyQ   | E  | 1358639 | 1359556 | 305 | - | <a href="#">3571500</a> | COG0752J  | glycyl-tRNA synthetase subunit alpha         | * |
| M5005_Spy_1386c | -      | NE | 1359928 | 1360461 | 177 | - | <a href="#">3571501</a> | COG1755S  | hypothetical protein M5005_Spy_1386          | * |
| M5005_Spy_1387c | -      | NE | 1360593 | 1361432 | 279 | - | <a href="#">3571502</a> | COG0656R  | aldo/keto reductase                          |   |
| M5005_Spy_1388c | nagA   | NE | 1361554 | 1362702 | 382 | - | <a href="#">3571503</a> | COG1820G  | N-acetylglucosamine-6-phosphate deacetylase  | * |
| M5005_Spy_1389c | -      | NE | 1362820 | 1364469 | 549 | - | <a href="#">3571504</a> | COG1283P  | sodium-dependent phosphate transporter       | * |
| M5005_Spy_1390  | -      | NE | 1364653 | 1365375 | 240 | + | <a href="#">3571505</a> | COG0711C  | hypothetical protein M5005_Spy_1390          |   |
| M5005_Spy_1391c | -      | NE | 1365504 | 1366346 | 280 | - | <a href="#">3571506</a> | COG1307S  | degV family protein                          | * |
| M5005_Spy_1392  | -      | NE | 1366639 | 1367196 | 185 | + | <a href="#">3571507</a> | COG1309R  | TetR family transcriptional regulator        | * |
| M5005_Spy_1393c | -      | NE | 1367232 | 1368056 | 274 | - | <a href="#">3571508</a> | COG0561R  | HAD superfamily hydrolase                    | * |
| M5005_Spy_1394c | -      | NE | 1368058 | 1368675 | 205 | - | <a href="#">3571509</a> | COG2860S  | hypothetical protein M5005_Spy_1394          | * |
| M5005_Spy_1395c | lacD.1 | NE | 1368872 | 1369849 | 325 | - | <a href="#">3571510</a> | COG3684G  | tagatose 1,6-diphosphate aldolase            | * |
| M5005_Spy_1396c | lacC1  | NE | 1369999 | 1370349 | 116 | - | <a href="#">3571511</a> | COG1105G  | tagatose-6-phosphate kinase                  |   |
| M5005_Spy_1397c | lacB.1 | NE | 1370359 | 1370874 | 171 | - | <a href="#">3571512</a> | COG0698G  | galactose-6-phosphate isomerase subunit LacB | * |
| M5005_Spy_1398c | lacA.1 | NE | 1370889 | 1371314 | 141 | - | <a href="#">3571513</a> | COG0698G  | galactose-6-phosphate isomerase subunit LacA | * |
| M5005_Spy_1399c | -      | NE | 1371554 | 1373002 | 482 | - | <a href="#">3571514</a> | COG3775G  | IIC                                          | * |
| M5005_Spy_1400c | -      | NE | 1373031 | 1373336 | 101 | - | <a href="#">3571515</a> | COG3414G  | IIB                                          | * |
| M5005_Spy_1401c | -      | NE | 1373329 | 1373802 | 157 | - | <a href="#">3571477</a> | COG1762GT | IIA                                          | * |
| M5005_Spy_1402  | lacR.1 | NE | 1374039 | 1374809 | 256 | + | <a href="#">3571478</a> | COG1349KG | lactose phosphotransferase system repressor  | * |
| M5005_Spy_1403c | -      | NE | 1374836 | 1375006 | 56  | - | <a href="#">3571479</a> | -         | copper chaperone                             |   |
| M5005_Spy_1404c | copZ   | NE | 1375013 | 1375216 | 67  | - | <a href="#">3571480</a> | COG2608P  | copper chaperone                             |   |
| M5005_Spy_1405c | copA   | NE | 1375230 | 1377461 | 743 | - | <a href="#">3571481</a> | COG2217P  | copper-exporting ATPase                      | * |
| M5005_Spy_1406c | copY   | NE | 1377461 | 1377895 | 144 | - | <a href="#">3571482</a> | COG3682K  | copAB ATPase metal-fist type repressor       |   |
| M5005_Spy_1407  | -      | NE | 1378067 | 1379053 | 328 | + | <a href="#">3571483</a> | COG0657I  | esterase                                     |   |
| M5005_Spy_1408c | rbfA   | C  | 1379187 | 1379543 | 118 | - | <a href="#">3571484</a> | COG0858J  | ribosome-binding factor A                    | * |
| M5005_Spy_1409c | infB   | E  | 1379742 | 1382603 | 953 | - | <a href="#">3571485</a> | COG0532J  | translation initiation factor IF-2           | * |
| M5005_Spy_1410c | -      | C  | 1382623 | 1382925 | 100 | - | <a href="#">3571486</a> | COG1358J  | hypothetical protein M5005_Spy_1410          | * |
| M5005_Spy_1411c | -      | C  | 1382918 | 1383214 | 98  | - | <a href="#">3571487</a> | COG2740K  | hypothetical protein M5005_Spy_1411          | * |
| M5005_Spy_1412c | nusA   | E  | 1383230 | 1384387 | 385 | - | <a href="#">3571488</a> | COG0195K  | transcription elongation factor NusA         | * |
| M5005_Spy_1413c | -      | NE | 1384562 | 1385098 | 178 | - | <a href="#">3571489</a> | COG0779S  | hypothetical protein M5005_Spy_1413          | * |
| M5005_Spy_1414c | -      | NC | 1385343 | 1385522 | 59  | - | <a href="#">3571490</a> | -         | phage protein                                |   |
| M5005_Spy_1415c | sdaD2  | NE | 1385761 | 1386933 | 390 | + | <a href="#">3571491</a> | -         | phage-encoded streptodornase                 |   |
| M5005_Spy_1416c | -      | NE | 1387049 | 1388245 | 398 | - | <a href="#">3571492</a> | COG1705NU | phage-associated cell wall hydrolase         |   |
| M5005_Spy_1417c | -      | NE | 1388356 | 1388541 | 61  | - | <a href="#">3571493</a> | -         | phage protein                                |   |
| M5005_Spy_1418c | -      | NE | 1388538 | 1388837 | 99  | - | <a href="#">3571494</a> | -         | phage protein                                |   |
| M5005_Spy_1419c | -      | NE | 1388848 | 1389468 | 206 | - | <a href="#">3571495</a> | -         | phage protein                                |   |
| M5005_Spy_1420c | -      | NC | 1389471 | 1389632 | 53  | - | <a href="#">3571457</a> | -         | phage protein                                |   |
| M5005_Spy_1421c | -      | NE | 1389641 | 1391548 | 635 | - | <a href="#">3571458</a> | COG1322S  | phage infection protein                      |   |
| M5005_Spy_1422c | -      | NE | 1391559 | 1392194 | 211 | - | <a href="#">3571459</a> | -         | phage protein                                |   |
| M5005_Spy_1423c | -      | NE | 1392194 | 1393249 | 351 | - | <a href="#">3571460</a> | -         | hyaluronoglucosaminidase                     |   |
| M5005_Spy_1424c | -      | NE | 1393246 | 1395228 | 660 | - | <a href="#">3571461</a> | COG0466O  | phage endopeptidase                          |   |





|                 |       |    |         |         |      |   |                         |            |                                                   |   |
|-----------------|-------|----|---------|---------|------|---|-------------------------|------------|---------------------------------------------------|---|
| M5005_Spy_1484c | accD  | E  | 1440831 | 1441601 | 256  | - | <a href="#">3571407</a> | COG0825I   | acetyl-CoA carboxylase subunit alpha              | * |
| M5005_Spy_1485c | accA  | E  | 1441598 | 1442464 | 288  | - | <a href="#">3571408</a> | COG0777I   | acetyl-CoA carboxylase subunit beta               | * |
| M5005_Spy_1486c | accC  | E  | 1442473 | 1443837 | 454  | - | <a href="#">3571409</a> | COG0439I   | acetyl-CoA carboxylase biotin carboxylase subunit | * |
| M5005_Spy_1487c | fabZ  | C  | 1443869 | 1444291 | 140  | - | <a href="#">3571410</a> | COG0764I   | (3R)-hydroxymyristoyl-ACP dehydratase             | * |
| M5005_Spy_1488c | accB  | E  | 1444288 | 1444788 | 166  | - | <a href="#">3571411</a> | COG0511I   | protein subunit                                   | * |
| M5005_Spy_1489c | fabF  | E  | 1444790 | 1446022 | 410  | - | <a href="#">3571412</a> | COG0304IQ  | 3-oxoacyl-ACP synthase                            | * |
| M5005_Spy_1490c | fabG  | E  | 1446037 | 1446771 | 244  | - | <a href="#">3571413</a> | COG1028IQR | 3-ketoacyl-ACP reductase                          | * |
| M5005_Spy_1491c | fabD  | E  | 1446761 | 1447699 | 312  | - | <a href="#">3571414</a> | COG0331I   | ACP S-malonyltransferase                          | * |
| M5005_Spy_1492c | fabK  | C  | 1447724 | 1448695 | 323  | - | <a href="#">3571415</a> | COG2070R   | enoyl-ACP reductase                               | * |
| M5005_Spy_1493c | acpP  | E  | 1448897 | 1449121 | 74   | - | <a href="#">3571416</a> | COG0236IQ  | acyl carrier protein                              | * |
| M5005_Spy_1494c | fabH  | E  | 1449182 | 1450156 | 324  | - | <a href="#">3571417</a> | COG0332I   | 3-oxoacyl-ACP synthase                            | * |
| M5005_Spy_1495c | -     | NC | 1450157 | 1450591 | 144  | - | <a href="#">3571418</a> | COG1846K   | MarR family transcriptional regulator             | * |
| M5005_Spy_1496c | phaB  | E  | 1450668 | 1451459 | 263  | - | <a href="#">3571380</a> | COG1024I   | enoyl-CoA hydratase                               | * |
| M5005_Spy_1497c | dnaJ  | E  | 1451679 | 1452836 | 385  | - | <a href="#">3571381</a> | COG0484O   | molecular chaperone DnaJ                          | * |
| M5005_Spy_1498c | dnaK  | E  | 1453117 | 1454943 | 608  | - | <a href="#">3571382</a> | COG0443O   | molecular chaperone DnaK                          | * |
| M5005_Spy_1499c | grpE  | E  | 1455124 | 1455657 | 177  | - | <a href="#">3571383</a> | COG0576O   | heat shock protein GrpE                           | * |
| M5005_Spy_1500c | hrcA  | C  | 1455699 | 1456733 | 344  | - | <a href="#">3571384</a> | COG1420K   | heat-inducible transcription repressor            | * |
| M5005_Spy_1501c | -     | NE | 1456868 | 1457437 | 189  | - | <a href="#">3571385</a> | COG1705NU  | N-acetylmuramoyl-L-alanine amidase                | * |
| M5005_Spy_1502c | -     | NE | 1457434 | 1458177 | 247  | - | <a href="#">3571386</a> | COG1876M   | D-alanyl-D-alanine carboxypeptidase               | * |
| M5005_Spy_1503c | -     | NE | 1458167 | 1458874 | 235  | - | <a href="#">3571387</a> | COG0406G   | phosphoglycerate mutase                           | * |
| M5005_Spy_1504c | -     | NE | 1459265 | 1459513 | 82   | - | <a href="#">3571388</a> | COG2261S   | hypothetical protein M5005_Spy_1504               |   |
| M5005_Spy_1505c | -     | NE | 1459723 | 1459938 | 71   | - | <a href="#">3571389</a> | -          | hypothetical protein M5005_Spy_1505               |   |
| M5005_Spy_1506c | gatB  | E  | 1459935 | 1461374 | 479  | - | <a href="#">3571390</a> | COG0064J   | aspartyl/glutamyl-tRNA amidotransferase subunit B | * |
| M5005_Spy_1507c | gatA  | E  | 1461374 | 1462840 | 488  | - | <a href="#">3571391</a> | COG0154J   | aspartyl/glutamyl-tRNA amidotransferase subunit A | * |
| M5005_Spy_1508c | gatC  | E  | 1462840 | 1463142 | 100  | - | <a href="#">3571392</a> | COG0721J   | aspartyl/glutamyl-tRNA amidotransferase subunit C | * |
| M5005_Spy_1509c | -     | NE | 1463374 | 1463583 | 69   | - | <a href="#">3571393</a> | COG0574G   | pyruvate, phosphate dikinase, partial             |   |
| M5005_Spy_1510c | -     | NC | 1463555 | 1463671 | 38   | - | <a href="#">3571394</a> | -          | pyruvate, phosphate dikinase                      |   |
| M5005_Spy_1511c | -     | NE | 1464245 | 1464691 | 148  | - | <a href="#">3571395</a> | COG1335Q   | pyrazinamidase/nicotinamidase                     | * |
| M5005_Spy_1512c | codY  | C  | 1464838 | 1465620 | 260  | - | <a href="#">3571396</a> | COG4465K   | transcriptional repressor CodY                    | * |
| M5005_Spy_1513c | -     | NE | 1465838 | 1467052 | 404  | - | <a href="#">3571397</a> | COG0436E   | aminotransferase                                  | * |
| M5005_Spy_1514c | -     | NE | 1467283 | 1467735 | 150  | + | <a href="#">3571398</a> | COG0589T   | universal stress protein                          | * |
| M5005_Spy_1515c | -     | NE | 1467858 | 1469135 | 425  | - | <a href="#">3571399</a> | COG4696S   | HAD superfamily hydrolase                         | * |
| M5005_Spy_1516c | asnB  | NE | 1469318 | 1470283 | 321  | + | <a href="#">3571361</a> | COG0252EJ  | L-asparaginase                                    | * |
| M5005_Spy_1517c | -     | NE | 1470632 | 1471336 | 234  | - | <a href="#">3571362</a> | -          | lantibiotic transport permease                    | * |
| M5005_Spy_1518c | -     | NE | 1471349 | 1472251 | 300  | - | <a href="#">3571363</a> | COG1131V   | transporter                                       | * |
| M5005_Spy_1519c | recG  | NE | 1472544 | 1474559 | 671  | - | <a href="#">3571364</a> | COG1200LK  | ATP-dependent DNA helicase RecG                   | * |
| M5005_Spy_1520c | -     | NE | 1474652 | 1474852 | 66   | + | <a href="#">3571365</a> | -          | hypothetical protein M5005_Spy_1520               |   |
| M5005_Spy_1521c | -     | NE | 1474934 | 1476388 | 484  | - | <a href="#">3571366</a> | COG1122P   | cobalt ABC transporter ATP-binding protein        | * |
| M5005_Spy_1522c | -     | NE | 1476325 | 1477005 | 226  | - | <a href="#">3571367</a> | COG0619P   | cobalt transporter cbiQ                           | * |
| M5005_Spy_1523c | -     | NE | 1477002 | 1477595 | 197  | - | <a href="#">3571368</a> | -          | permease                                          | * |
| M5005_Spy_1524c | cycC  | NE | 1477592 | 1479262 | 556  | - | <a href="#">3571369</a> | COG1132V   | ABC transporter ATP-binding protein               | * |
| M5005_Spy_1525c | cycD  | NE | 1479255 | 1481018 | 587  | - | <a href="#">3571370</a> | COG4988CO  | ABC transporter ATP-binding protein               | * |
| M5005_Spy_1526c | fhuC  | NE | 1481015 | 1481851 | 278  | - | <a href="#">3571371</a> | COG1120PH  | ferrichrome ABC transporter ATP-binding protein   | * |
| M5005_Spy_1527c | fhuB2 | NE | 1481848 | 1482870 | 340  | - | <a href="#">3571372</a> | COG0609P   | ferrichrome transporter permease                  | * |
| M5005_Spy_1528c | fhuD2 | NE | 1482872 | 1483756 | 294  | - | <a href="#">3571373</a> | COG0614P   | ferrichrome-binding protein                       | * |
| M5005_Spy_1529c | shp   | NE | 1483740 | 1484615 | 291  | - | <a href="#">3571374</a> | -          | heme binding protein                              | * |
| M5005_Spy_1530c | -     | NE | 1484812 | 1488639 | 1275 | - | <a href="#">3571375</a> | COG4886S   | Fe3+-siderophore transporter                      | * |
| M5005_Spy_1531c | isp2  | NE | 1489128 | 1490639 | 503  | - | <a href="#">3571376</a> | COG3942R   | hypothetical protein M5005_Spy_1531               | * |
| M5005_Spy_1532c | air   | NC | 1490726 | 1491826 | 366  | - | <a href="#">3571377</a> | COG0787M   | alanine racemase                                  | * |
| M5005_Spy_1533c | acpS  | NC | 1491823 | 1492179 | 118  | - | <a href="#">3571378</a> | COG0736I   | 4'-phosphopantetheinyl transferase                | * |
| M5005_Spy_1534c | secA  | E  | 1492295 | 1494814 | 839  | - | <a href="#">3571379</a> | COG0653U   | preprotein translocase subunit SecA               | * |
| M5005_Spy_1535c | -     | NC | 1494892 | 1494996 | 34   | - | <a href="#">3571341</a> | -          | hypothetical protein M5005_Spy_1535               |   |
| M5005_Spy_1536c | -     | NE | 1494980 | 1495495 | 171  | - | <a href="#">3571342</a> | -          | transposase                                       |   |
| M5005_Spy_1537c | -     | NE | 1495398 | 1496102 | 234  | - | <a href="#">3571343</a> | COG5433L   | transposase, partial                              |   |
| M5005_Spy_1538c | pmi   | NE | 1496264 | 1497217 | 317  | - | <a href="#">3571344</a> | COG1482G   | mannose-6-phosphate isomerase                     | * |
| M5005_Spy_1539c | scrK  | NE | 1497312 | 1498268 | 318  | - | <a href="#">3571345</a> | COG1940KG  | fructokinase                                      | * |
| M5005_Spy_1540c | endoS | NE | 1498460 | 1501447 | 995  | - | <a href="#">3571346</a> | -          | endo-beta-N-acetylglucosaminidase F2              |   |
| M5005_Spy_1541c | -     | NC | 1501471 | 1501635 | 54   | - | <a href="#">3571347</a> | -          | hypothetical protein M5005_Spy_1541               |   |
| M5005_Spy_1542c | scrA  | NE | 1501678 | 1503561 | 627  | - | <a href="#">3571348</a> | COG1263G   | IIABC                                             | * |

|                 |        |    |         |         |     |   |                         |          |                                                 |  |   |
|-----------------|--------|----|---------|---------|-----|---|-------------------------|----------|-------------------------------------------------|--|---|
| M5005_Spy_1543  | scrB   | NE | 1503803 | 1505242 | 479 | + | <a href="#">3571349</a> | COG1621G | sucrose-6-phosphate hydrolase                   |  | * |
| M5005_Spy_1544  | scrR   | NE | 1505247 | 1506212 | 321 | + | <a href="#">3571350</a> | COG1609K | sucrose operon repressor                        |  | * |
| M5005_Spy_1545c | nusB   | C  | 1506353 | 1506805 | 150 | - | <a href="#">3571351</a> | COG0781K | transcription antitermination protein NusB      |  | * |
| M5005_Spy_1546c | -      | NC | 1506798 | 1507187 | 129 | - | <a href="#">3571352</a> | COG1302S | Gls24 family general stress protein             |  | * |
| M5005_Spy_1547c | efp    | NE | 1507233 | 1507790 | 185 | - | <a href="#">3571353</a> | COG0231J | elongation factor P                             |  | * |
| M5005_Spy_1548c | comEB  | NE | 1507886 | 1508347 | 153 | - | <a href="#">3571354</a> | COG2131F | competence protein ComE                         |  | * |
| M5005_Spy_1549c | pepP   | NE | 1508382 | 1509455 | 357 | - | <a href="#">3571355</a> | COG0006E | Xaa-Pro dipeptidase                             |  | * |
| M5005_Spy_1550c | uvrA   | NE | 1509570 | 1512428 | 952 | - | <a href="#">3571356</a> | COG0178L | excinuclease ABC subunit A                      |  | * |
| M5005_Spy_1551  | corA   | E  | 1512601 | 1513545 | 314 | + | <a href="#">3571357</a> | COG0598P | magnesium and cobalt transporter                |  | * |
| M5005_Spy_1552  | -      | NE | 1513678 | 1514334 | 218 | + | <a href="#">3571358</a> | COG4858S | hypothetical protein M5005_Spy_1552             |  | * |
| M5005_Spy_1553c | rpsR   | NC | 1514467 | 1514706 | 79  | - | <a href="#">3571359</a> | COG0238J | 30S ribosomal protein S18                       |  | * |
| M5005_Spy_1554c | ssb3   | NC | 1514871 | 1515362 | 163 | - | <a href="#">3571360</a> | COG0629L | single-stranded DNA-binding protein             |  | * |
| M5005_Spy_1555c | rpsF   | NC | 1515384 | 1515674 | 96  | - | <a href="#">3571322</a> | COG0360J | 30S ribosomal protein S6                        |  | * |
| M5005_Spy_1556c | -      | NE | 1515847 | 1516140 | 97  | - | <a href="#">3571323</a> | -        | hypothetical protein M5005_Spy_1556             |  | * |
| M5005_Spy_1557  | mutY   | NE | 1516461 | 1517462 | 333 | + | <a href="#">3571324</a> | COG1194L | A/G-specific adenine glycosylase                |  | * |
| M5005_Spy_1558  | -      | NE | 1517538 | 1518125 | 195 | + | <a href="#">3571325</a> | COG1476K | transcriptional regulator                       |  | * |
| M5005_Spy_1559c | trx    | NE | 1518177 | 1518491 | 104 | - | <a href="#">3571326</a> | COG3118O | thioredoxin                                     |  | * |
| M5005_Spy_1560c | -      | NE | 1518572 | 1519075 | 167 | - | <a href="#">3571327</a> | COG0671I | phosphatidylglycerophosphatase B                |  | * |
| M5005_Spy_1561c | mutS2  | NE | 1519076 | 1521415 | 779 | - | <a href="#">3571328</a> | COG1193L | DNA mismatch repair protein                     |  | * |
| M5005_Spy_1562c | -      | NE | 1521564 | 1522109 | 181 | - | <a href="#">3571329</a> | COG1286R | colicin V production protein                    |  | * |
| M5005_Spy_1563c | -      | NE | 1522112 | 1522420 | 102 | - | <a href="#">3571330</a> | -        | hypothetical protein M5005_Spy_1563             |  | * |
| M5005_Spy_1564  | -      | C  | 1522577 | 1523479 | 300 | + | <a href="#">3571331</a> | COG1039L | ribonuclease HIII                               |  | * |
| M5005_Spy_1565  | spi    | E  | 1523490 | 1524083 | 197 | + | <a href="#">3571332</a> | COG0681U | signal peptidase I                              |  | * |
| M5005_Spy_1566  | recD   | NE | 1524141 | 1526594 | 817 | + | <a href="#">3571333</a> | COG0507L | exodeoxyribonuclease V subunit alpha            |  | * |
| M5005_Spy_1567  | -      | NE | 1526685 | 1527167 | 160 | + | <a href="#">3571334</a> | -        | hypothetical protein M5005_Spy_1567             |  | * |
| M5005_Spy_1568c | dinP   | NE | 1527260 | 1528354 | 364 | - | <a href="#">3571335</a> | COG0389L | DNA polymerase IV                               |  | * |
| M5005_Spy_1569  | pfl    | NE | 1528563 | 1530890 | 775 | + | <a href="#">3571336</a> | COG1882C | formate acetyltransferase                       |  | * |
| M5005_Spy_1570c | -      | NE | 1531068 | 1532018 | 316 | - | <a href="#">3571337</a> | COG1680V | penicillin-binding protein                      |  | * |
| M5005_Spy_1571c | cppA   | NE | 1532003 | 1532755 | 250 | - | <a href="#">3571338</a> | COG2514R | c3-degrading proteinase                         |  | * |
| M5005_Spy_1572  | -      | NE | 1533053 | 1533949 | 298 | + | <a href="#">3571339</a> | COG0730R | hypothetical protein M5005_Spy_1572             |  | * |
| M5005_Spy_1573c | glpF.2 | C  | 1534285 | 1535133 | 282 | - | <a href="#">3571340</a> | COG0580G | aquaporin                                       |  | * |
| M5005_Spy_1574c | -      | NC | 1535303 | 1535449 | 48  | - | <a href="#">3571302</a> | -        | universal stress protein                        |  | * |
| M5005_Spy_1575c | norA   | NE | 1535635 | 1536831 | 398 | - | <a href="#">3571303</a> | COG2814G | quinolone resistance protein                    |  | * |
| M5005_Spy_1576  | srv    | NE | 1536937 | 1537656 | 239 | + | <a href="#">3571304</a> | COG0664T | Crp/Fnr family transcriptional regulator        |  | * |
| M5005_Spy_1577  | pepXP  | NE | 1537678 | 1539960 | 760 | + | <a href="#">3571305</a> | COG2936R | x-prolyl-dipeptidyl aminopeptidase              |  | * |
| M5005_Spy_1578c | -      | NE | 1540040 | 1540261 | 73  | - | <a href="#">3571306</a> | COG1476K | Cro/CI family transcriptional regulator         |  | * |
| M5005_Spy_1579  | -      | NE | 1540431 | 1540805 | 124 | + | <a href="#">3571307</a> | COG1476K | transcriptional regulator                       |  | * |
| M5005_Spy_1580  | -      | NE | 1540998 | 1541297 | 99  | + | <a href="#">3571308</a> | COG0718S | hypothetical protein M5005_Spy_1580             |  | * |
| M5005_Spy_1581c | -      | NE | 1541354 | 1542091 | 245 | - | <a href="#">3571309</a> | COG0789K | MerR family transcriptional regulator           |  | * |
| M5005_Spy_1582c | dnaQ   | NE | 1542240 | 1542827 | 195 | - | <a href="#">3571310</a> | COG0847L | DNA polymerase III subunit epsilon              |  | * |
| M5005_Spy_1583c | -      | NE | 1542876 | 1543406 | 176 | - | <a href="#">3571311</a> | -        | hypothetical protein M5005_Spy_1583             |  | * |
| M5005_Spy_1584  | -      | NE | 1543612 | 1544781 | 389 | + | <a href="#">3571312</a> | COG2081R | NAD(FAD)-utilizing dehydrogenase                |  | * |
| M5005_Spy_1585c | deoC   | NE | 1544876 | 1545547 | 223 | - | <a href="#">3571313</a> | COG0274F | deoxyribose-phosphate aldolase                  |  | * |
| M5005_Spy_1586c | nupC   | NE | 1545577 | 1546779 | 400 | - | <a href="#">3571314</a> | COG1972F | nucleoside permease                             |  | * |
| M5005_Spy_1587c | udp    | NE | 1546800 | 1547579 | 259 | - | <a href="#">3571315</a> | COG2820F | uridine phosphorylase                           |  | * |
| M5005_Spy_1588c | -      | NC | 1547644 | 1547745 | 33  | - | <a href="#">3571316</a> | -        | hypothetical protein M5005_Spy_1588             |  | * |
| M5005_Spy_1589  | crgR   | NE | 1547819 | 1548562 | 247 | + | <a href="#">3571317</a> | COG2188K | GntR family transcriptional regulator           |  | * |
| M5005_Spy_1590  | rpsN   | NE | 1548798 | 1549067 | 89  | + | <a href="#">3571318</a> | COG0199J | 30S ribosomal protein S14                       |  | * |
| M5005_Spy_1591c | gcp    | E  | 1549238 | 1550266 | 342 | - | <a href="#">3571319</a> | COG0533O | DNA-binding/iron metalloprotein/AP endonuclease |  | * |
| M5005_Spy_1592c | -      | NE | 1550256 | 1550711 | 151 | - | <a href="#">3571320</a> | COG0456R | ribosomal-protein-alanine acetyltransferase     |  | * |
| M5005_Spy_1593c | -      | C  | 1550683 | 1551381 | 232 | - | <a href="#">3571321</a> | COG1214O | glycoprotease                                   |  | * |
| M5005_Spy_1594  | -      | E  | 1551666 | 1551896 | 76  | + | <a href="#">3571284</a> | COG5503S | hypothetical protein M5005_Spy_1594             |  | * |
| M5005_Spy_1595  | -      | E  | 1551898 | 1553580 | 560 | + | <a href="#">3571285</a> | COG0595R | Zn-dependent hydrolase                          |  | * |
| M5005_Spy_1596c | glnA   | NE | 1553807 | 1555153 | 448 | - | <a href="#">3571286</a> | COG0174E | glutamine synthetase                            |  | * |
| M5005_Spy_1597c | glnR   | NE | 1555191 | 1555562 | 123 | - | <a href="#">3571287</a> | COG0789K | MerR family transcriptional regulator           |  | * |
| M5005_Spy_1598c | -      | NE | 1555629 | 1556180 | 183 | - | <a href="#">3571288</a> | COG4129S | hypothetical protein M5005_Spy_1598             |  | * |
| M5005_Spy_1599c | pgk    | E  | 1556443 | 1557639 | 398 | - | <a href="#">3571289</a> | COG0126G | phosphoglycerate kinase                         |  | * |
| M5005_Spy_1600c | lppC   | NE | 1557832 | 1558686 | 284 | - | <a href="#">3571290</a> | COG2503R | acid phosphatase                                |  | * |
| M5005_Spy_1601c | -      | NE | 1558916 | 1559806 | 296 | - | <a href="#">3571291</a> | COG0330O | membrane protease                               |  | * |

|                 |           |    |         |         |     |   |                         |           |                                                      |  |   |
|-----------------|-----------|----|---------|---------|-----|---|-------------------------|-----------|------------------------------------------------------|--|---|
| M5005_Spy_1602c | -         | E  | 1560043 | 1561707 | 554 | - | <a href="#">3571292</a> | COG1461R  | kinase                                               |  | * |
| M5005_Spy_1603c | asp       | NE | 1561707 | 1562072 | 121 | - | <a href="#">3571293</a> | COG1302S  | alkaline-shock protein                               |  | * |
| M5005_Spy_1604c | -         | NC | 1562097 | 1562234 | 45  | - | <a href="#">3571294</a> | -         | hypothetical protein M5005_Spy_1604                  |  |   |
| M5005_Spy_1605c | -         | NE | 1562239 | 1563372 | 377 | - | <a href="#">3571295</a> | COG5433L  | transposase                                          |  |   |
| M5005_Spy_1606c | rpmB      | NE | 1563550 | 1563738 | 62  | - | <a href="#">3571296</a> | COG0227J  | 50S ribosomal protein L28                            |  |   |
| M5005_Spy_1607c | fba       | E  | 1564120 | 1565001 | 293 | - | <a href="#">3571297</a> | COG0191G  | fructose-bisphosphate aldolase                       |  | * |
| M5005_Spy_1608c | -         | NE | 1565347 | 1566273 | 308 | - | <a href="#">3571299</a> | COG1073R  | alpha/beta hydrolase                                 |  | * |
| M5005_Spy_1610c | pyrG      | NE | 1567892 | 1568044 | 50  | - | <a href="#">3571301</a> | COG0504F  | CTP synthase, partial                                |  | * |
| M5005_Spy_1611c | rpoE      | NE | 1568301 | 1568876 | 191 | - | <a href="#">3571270</a> | COG3343K  | DNA-directed RNA polymerase subunit delta            |  | * |
| M5005_Spy_1612c | tig/ropA  | NE | 1569093 | 1570376 | 427 | - | <a href="#">3571271</a> | COG0544O  | trigger factor                                       |  | * |
| M5005_Spy_1613  | -         | NE | 1570697 | 1571542 | 281 | + | <a href="#">3571272</a> | COG0668M  | mechanosensitive ion channel MscS                    |  | * |
| M5005_Spy_1614c | -         | NE | 1571607 | 1572167 | 186 | - | <a href="#">3571273</a> | COG4475S  | hypothetical protein M5005_Spy_1614                  |  | * |
| M5005_Spy_1615c | -         | NE | 1572181 | 1572651 | 156 | - | <a href="#">3571274</a> | COG4720S  | hypothetical protein M5005_Spy_1615                  |  | * |
| M5005_Spy_1616c | thiD      | NE | 1572641 | 1573405 | 254 | - | <a href="#">3571275</a> | COG0351H  | phosphomethylpyrimidine kinase                       |  | * |
| M5005_Spy_1617c | truA      | NE | 1573395 | 1574144 | 249 | - | <a href="#">3571276</a> | COG0101J  | tRNA pseudouridine synthase A                        |  | * |
| M5005_Spy_1618c | comX.2    | NE | 1574329 | 1574880 | 183 | - | <a href="#">3571277</a> | -         | competence-specific sigma factor                     |  |   |
| M5005_Spy_1619  | -         | NC | 1580302 | 1580436 | 44  | + | <a href="#">3571251</a> | -         | hypothetical protein M5005_Spy_1619                  |  |   |
| M5005_Spy_1620c | -         | NE | 1580598 | 1581740 | 380 | - | <a href="#">3571252</a> | COG1929G  | glycerate kinase                                     |  | * |
| M5005_Spy_1621  | hsdR      | NE | 1582022 | 1585000 | 992 | + | <a href="#">3571253</a> | COG0610V  | subunit                                              |  | * |
| M5005_Spy_1622  | hsdS      | NE | 1585013 | 1586212 | 399 | + | <a href="#">3571254</a> | COG0732V  | subunit                                              |  | * |
| M5005_Spy_1623  | hsdM      | NE | 1586225 | 1587805 | 526 | + | <a href="#">3571255</a> | COG0286V  | subunit                                              |  | * |
| M5005_Spy_1624c | -         | NE | 1588015 | 1588206 | 63  | - | <a href="#">3571256</a> | -         | hypothetical protein M5005_Spy_1624                  |  |   |
| M5005_Spy_1625c | salR      | NE | 1588358 | 1588963 | 201 | - | <a href="#">3571257</a> | COG2197TK | transcriptional regulatory protein                   |  | * |
| M5005_Spy_1626c | salK      | NE | 1588944 | 1590506 | 520 | - | <a href="#">3571258</a> | COG4585T  | sensory transduction protein kinase                  |  |   |
| M5005_Spy_1627c | salY      | NE | 1590546 | 1592453 | 635 | - | <a href="#">3571259</a> | COG3127Q  | ABC transporter permease                             |  |   |
| M5005_Spy_1628c | salX      | NE | 1592455 | 1593192 | 245 | - | <a href="#">3571260</a> | COG1136V  | ABC transporter ATP-binding protein                  |  |   |
| M5005_Spy_1629c | salX/salT | NE | 1593189 | 1593650 | 153 | - | <a href="#">3571261</a> | COG2274V  | antibiotic transport ATP-binding protein             |  |   |
| M5005_Spy_1630c | salB      | NE | 1593724 | 1595349 | 541 | - | <a href="#">3571262</a> | COG4403V  | serine (threonine) dehydratase                       |  |   |
| M5005_Spy_1631c | salA      | NC | 1595432 | 1595578 | 48  | - | <a href="#">3571263</a> | -         | antibiotic salivaricin A                             |  |   |
| M5005_Spy_1632c | lacG      | NE | 1596090 | 1597496 | 468 | - | <a href="#">3571264</a> | COG2723G  | 6-phospho-beta-galactosidase                         |  | * |
| M5005_Spy_1633c | lacE      | NE | 1597584 | 1599281 | 565 | - | <a href="#">3571265</a> | COG1455G  | PTS system lactose-specific transporter subunit IIBC |  |   |
| M5005_Spy_1634c | lacF      | NE | 1599281 | 1599598 | 105 | - | <a href="#">3571266</a> | COG1447G  | PTS system lactose-specific transporter subunit IIA  |  | * |
| M5005_Spy_1635c | lacD.2    | NE | 1599622 | 1600605 | 327 | - | <a href="#">3571267</a> | COG3684G  | tagatose 1,6-diphosphate aldolase                    |  | * |
| M5005_Spy_1636c | lacC.2    | NE | 1600609 | 1601538 | 309 | - | <a href="#">3571268</a> | COG1105G  | tagatose-6-phosphate kinase                          |  | * |
| M5005_Spy_1637c | lacB.2    | NE | 1601586 | 1602101 | 171 | - | <a href="#">3571269</a> | COG0698G  | galactose-6-phosphate isomerase subunit LacB         |  | * |
| M5005_Spy_1638c | lacA.2    | NE | 1602136 | 1602564 | 142 | - | <a href="#">3571231</a> | COG0698G  | galactose-6-phosphate isomerase subunit LacA         |  | * |
| M5005_Spy_1639  | lacR.2    | NE | 1603011 | 1603784 | 257 | + | <a href="#">3571232</a> | COG1349KG | lactose phosphotransferase system repressor          |  | * |
| M5005_Spy_1640  | -         | NE | 1604445 | 1604732 | 95  | + | <a href="#">3571233</a> | -         | DNA-damage-inducible protein J                       |  |   |
| M5005_Spy_1641  | -         | NE | 1604722 | 1605057 | 111 | + | <a href="#">3571234</a> | -         | hypothetical protein M5005_Spy_1641                  |  | * |
| M5005_Spy_1642  | -         | NE | 1605209 | 1605391 | 60  | + | <a href="#">3571235</a> | -         | DNA integration/recombination/inversion protein      |  |   |
| M5005_Spy_1643  | -         | NC | 1605380 | 1605565 | 61  | - | <a href="#">3571237</a> | -         | DNA integration/recombination/inversion protein      |  |   |
| M5005_Spy_1644c | -         | NC | 1605479 | 1605679 | 66  | + | <a href="#">3571236</a> | -         | hypothetical protein M5005_Spy_1644                  |  |   |
| M5005_Spy_1645  | -         | NC | 1606013 | 1606162 | 49  | + | <a href="#">3571238</a> | -         | DNA integration/recombination/inversion protein      |  |   |
| M5005_Spy_1646c | rpsI      | NC | 1606282 | 1606674 | 130 | - | <a href="#">3571239</a> | COG0103J  | 30S ribosomal protein S9                             |  | * |
| M5005_Spy_1647c | rplM      | NC | 1606695 | 1607141 | 148 | - | <a href="#">3571240</a> | COG0102J  | 50S ribosomal protein L13                            |  | * |
| M5005_Spy_1648c | -         | NC | 1607359 | 1607565 | 68  | - | <a href="#">3571241</a> | COG1476K  | Cro/CI family transcriptional regulator              |  |   |
| M5005_Spy_1649c | -         | NE | 1607562 | 1608068 | 168 | - | <a href="#">3571242</a> | -         | hypothetical protein M5005_Spy_1649                  |  | * |
| M5005_Spy_1650c | -         | NE | 1608204 | 1609064 | 286 | - | <a href="#">3571243</a> | COG1307S  | degV family protein                                  |  | * |
| M5005_Spy_1651c | -         | NE | 1609161 | 1609679 | 172 | - | <a href="#">3571244</a> | COG3688R  | hypothetical protein M5005_Spy_1651                  |  | * |
| M5005_Spy_1652c | -         | NE | 1609683 | 1610429 | 248 | - | <a href="#">3571245</a> | COG0566J  | 23S rRNA methyltransferase                           |  | * |
| M5005_Spy_1653c | -         | NE | 1610476 | 1611273 | 265 | - | <a href="#">3571246</a> | -         | hypothetical protein M5005_Spy_1653                  |  | * |
| M5005_Spy_1654c | -         | NE | 1611469 | 1611882 | 137 | - | <a href="#">3571247</a> | COG1939S  | hypothetical protein M5005_Spy_1654                  |  | * |
| M5005_Spy_1655c | cysS      | E  | 1611875 | 1613218 | 447 | - | <a href="#">3571248</a> | COG0215J  | cysteinyI-tRNA synthetase                            |  | * |
| M5005_Spy_1656c | -         | NE | 1613246 | 1613476 | 76  | - | <a href="#">3571249</a> | -         | hypothetical protein M5005_Spy_1656                  |  |   |
| M5005_Spy_1657c | -         | NE | 1613489 | 1613761 | 90  | - | <a href="#">3571250</a> | -         | hypothetical protein M5005_Spy_1657                  |  |   |
| M5005_Spy_1658c | cysE      | NC | 1613955 | 1614536 | 193 | - | <a href="#">3571212</a> | COG1045E  | serine acetyltransferase                             |  | * |
| M5005_Spy_1659c | -         | NE | 1614545 | 1615297 | 250 | - | <a href="#">3571213</a> | -         | hypothetical protein M5005_Spy_1659                  |  | * |
| M5005_Spy_1660c | pnp       | NE | 1615290 | 1617422 | 710 | - | <a href="#">3571214</a> | COG1185J  | polynucleotide phosphorylase                         |  | * |
| M5005_Spy_1661c | -         | NE | 1617703 | 1618431 | 242 | - | <a href="#">3571215</a> | COG0176G  | transaldolase                                        |  | * |

|                 |         |    |         |         |      |   |                         |           |                                               |  |   |
|-----------------|---------|----|---------|---------|------|---|-------------------------|-----------|-----------------------------------------------|--|---|
| M5005_Spy_1662c | ulaA    | NE | 1618587 | 1619822 | 411  | - | <a href="#">3571216</a> | COG3037S  | IIC                                           |  | * |
| M5005_Spy_1663c | -       | NE | 1619849 | 1620133 | 94   | - | <a href="#">3571217</a> | COG3414G  | PTS system transporter subunit IIB            |  | * |
| M5005_Spy_1664c | -       | NE | 1620126 | 1622186 | 686  | - | <a href="#">3571218</a> | COG3711K  | component                                     |  | * |
| M5005_Spy_1665c | -       | NC | 1622411 | 1622554 | 47   | - | <a href="#">3571219</a> | -         | hypothetical protein M5005_Spy_1665           |  | * |
| M5005_Spy_1666c | rpsO    | NC | 1622538 | 1622807 | 89   | - | <a href="#">3571220</a> | COG0184J  | 30S ribosomal protein S15                     |  | * |
| M5005_Spy_1667c | -       | NC | 1622965 | 1623120 | 51   | - | <a href="#">3571221</a> | -         | hypothetical protein M5005_Spy_1667           |  | * |
| M5005_Spy_1668  | -       | NE | 1623246 | 1623515 | 89   | + | <a href="#">3571222</a> | -         | transcriptional regulator                     |  | * |
| M5005_Spy_1669  | def     | E  | 1623616 | 1624230 | 204  | + | <a href="#">3571223</a> | COG0242J  | peptide deformylase                           |  | * |
| M5005_Spy_1670c | -       | NE | 1624264 | 1624806 | 180  | - | <a href="#">3571224</a> | COG0431R  | oxidoreductase                                |  | * |
| M5005_Spy_1671c | -       | NE | 1624937 | 1625365 | 142  | - | <a href="#">3571225</a> | COG1846K  | MarR family transcriptional regulator         |  | * |
| M5005_Spy_1672c | polC    | E  | 1625475 | 1629872 | 1465 | - | <a href="#">3571226</a> | COG2176L  | DNA polymerase III PolC                       |  | * |
| M5005_Spy_1673c | proS    | E  | 1630127 | 1631983 | 618  | - | <a href="#">3571227</a> | COG0442J  | prolyl-tRNA synthetase                        |  | * |
| M5005_Spy_1674c | eep     | NE | 1632181 | 1633440 | 419  | - | <a href="#">3571228</a> | COG0750M  | pheromone-processing membrane metalloprotease |  | * |
| M5005_Spy_1675c | cdsA    | E  | 1633513 | 1634307 | 264  | - | <a href="#">3571229</a> | COG0575I  | phosphatidate cytidyltransferase              |  | * |
| M5005_Spy_1676c | uppS    | E  | 1634320 | 1635069 | 249  | - | <a href="#">3571230</a> | COG0020I  | undecaprenyl pyrophosphate synthase           |  | * |
| M5005_Spy_1677c | yajC    | NE | 1635288 | 1635653 | 121  | - | <a href="#">3571192</a> | COG1862U  | preprotein translocase subunit YajC           |  | * |
| M5005_Spy_1678c | -       | NE | 1635769 | 1636116 | 115  | - | <a href="#">3571193</a> | COG05260C | thioredoxin                                   |  | * |
| M5005_Spy_1680c | pulA    | NE | 1638902 | 1639783 | 293  | - | <a href="#">3571195</a> | -         | pullulanase, partial                          |  | * |
| M5005_Spy_1681c | dexB    | NE | 1639954 | 1641567 | 537  | - | <a href="#">3571196</a> | COG0366G  | glucan 1,6-alpha-glucosidase                  |  | * |
| M5005_Spy_1682c | msmK    | NE | 1641696 | 1642829 | 377  | - | <a href="#">3571197</a> | COG3839G  | multiple sugar transport ATP-binding protein  |  | * |
| M5005_Spy_1683c | lrp     | NE | 1643127 | 1643975 | 282  | - | <a href="#">3571198</a> | COG2508TQ | hypothetical protein M5005_Spy_1683           |  | * |
| M5005_Spy_1684  | ska     | NE | 1644335 | 1645657 | 440  | + | <a href="#">3571199</a> | -         | streptokinase                                 |  | * |
| M5005_Spy_1685c | dtd     | NE | 1645755 | 1646198 | 147  | - | <a href="#">3571200</a> | COG1490J  | D-tyrosyl-tRNA(Tyr) deacylase                 |  | * |
| M5005_Spy_1686c | relA    | E  | 1646213 | 1648432 | 739  | - | <a href="#">3571201</a> | COG0317TK | GTP pyrophosphokinase                         |  | * |
| M5005_Spy_1687c | sclA    | NE | 1648684 | 1648827 | 47   | - | <a href="#">3571202</a> | -         | hypothetical protein M5005_Spy_1687           |  | * |
| M5005_Spy_1690  | nrdI2   | NE | 1650113 | 1650595 | 160  | + | <a href="#">3571205</a> | COG1780F  | flavoprotein NrdI                             |  | * |
| M5005_Spy_1691c | -       | NE | 1650989 | 1651807 | 272  | - | <a href="#">3571206</a> | COG3568R  | exodeoxyribonuclease III                      |  | * |
| M5005_Spy_1693c | -       | NE | 1653782 | 1654075 | 97   | - | <a href="#">3571208</a> | COG1263G  | IIABC                                         |  | * |
| M5005_Spy_1694c | -       | NE | 1654433 | 1655182 | 249  | - | <a href="#">3571209</a> | COG1385S  | 16S ribosomal RNA methyltransferase RsmE      |  | * |
| M5005_Spy_1695c | prmA    | NE | 1655182 | 1656135 | 317  | - | <a href="#">3571210</a> | COG2264J  | 50S ribosomal protein L11 methyltransferase   |  | * |
| M5005_Spy_1696c | -       | NE | 1656206 | 1656676 | 156  | - | <a href="#">3571211</a> | -         | hypothetical protein M5005_Spy_1696           |  | * |
| M5005_Spy_1697  | papB    | NE | 1656876 | 1658633 | 585  | + | <a href="#">3571174</a> | COG0147EH | amino-4-deoxychorismate lyase                 |  | * |
| M5005_Spy_1698  | trpG    | NC | 1658666 | 1659232 | 188  | + | <a href="#">3571175</a> | COG0512EH | anthranilate synthase component II            |  | * |
| M5005_Spy_1699  | -       | NE | 1659265 | 1660533 | 422  | + | <a href="#">3571176</a> | COG2256L  | recombination factor protein RarA             |  | * |
| M5005_Spy_1700  | pai1    | NE | 1661030 | 1661470 | 146  | + | <a href="#">3571178</a> | COG3153R  | acetyltransferase                             |  | * |
| M5005_Spy_1701  | flaR    | NE | 1661525 | 1662031 | 168  | + | <a href="#">3571179</a> | COG0563F  | topology modulation protein                   |  | * |
| M5005_Spy_1702  | smeZ    | NE | 1662280 | 1662981 | 233  | + | <a href="#">3571180</a> | -         | mitogenic exotoxin Z                          |  | * |
| M5005_Spy_1703c | -       | NE | 1663265 | 1663531 | 88   | - | <a href="#">3571181</a> | -         | hypothetical protein M5005_Spy_1703           |  | * |
| M5005_Spy_1704  | dppA    | NE | 1663710 | 1665338 | 542  | + | <a href="#">3571182</a> | COG0747E  | dipeptide-binding protein                     |  | * |
| M5005_Spy_1705  | dppB    | NE | 1665451 | 1666428 | 325  | + | <a href="#">3571183</a> | COG0601EP | dipeptide transporter permease                |  | * |
| M5005_Spy_1706  | dppC    | NE | 1666425 | 1667246 | 273  | + | <a href="#">3571184</a> | COG1173EP | dipeptide transporter permease                |  | * |
| M5005_Spy_1707  | dppD    | NE | 1667258 | 1668061 | 267  | + | <a href="#">3571185</a> | COG0444EP | dipeptide transport ATP-binding protein       |  | * |
| M5005_Spy_1708  | dppE    | NE | 1668045 | 1668671 | 208  | + | <a href="#">3571186</a> | COG1124EP | dipeptide transport ATP-binding protein       |  | * |
| M5005_Spy_1709c | -       | NE | 1668752 | 1668952 | 66   | - | <a href="#">3571187</a> | -         | hypothetical protein M5005_Spy_1709           |  | * |
| M5005_Spy_1710c | -       | NE | 1669121 | 1671598 | 825  | - | <a href="#">3571188</a> | -         | histidine triad protein                       |  | * |
| M5005_Spy_1711c | lmb     | NE | 1671611 | 1672531 | 306  | - | <a href="#">3571189</a> | COG0803P  | laminin binding protein                       |  | * |
| M5005_Spy_1712c | -       | NE | 1672709 | 1673842 | 377  | - | <a href="#">3571190</a> | COG5433L  | transposase                                   |  | * |
| M5005_Spy_1713c | -       | NC | 1673896 | 1674048 | 50   | - | <a href="#">3571191</a> | -         | hypothetical protein M5005_Spy_1713           |  | * |
| M5005_Spy_1714c | -       | NE | 1674093 | 1675160 | 355  | - | <a href="#">3571154</a> | COG5373S  | cell surface protein                          |  | * |
| M5005_Spy_1715c | scpA    | NE | 1675257 | 1678751 | 1164 | - | <a href="#">3571155</a> | COG1404O  | CSA peptidase                                 |  | * |
| M5005_Spy_1716  | -       | NE | 1679185 | 1680390 | 401  | + | <a href="#">3571156</a> | COG3666L  | transposase                                   |  | * |
| M5005_Spy_1717  | -       | NC | 1680369 | 1680551 | 60   | + | <a href="#">3571157</a> | -         | transposase, partial                          |  | * |
| M5005_Spy_1718c | sic1.01 | NE | 1680969 | 1681910 | 313  | - | <a href="#">3571158</a> | -         | inhibitor of complement protein               |  | * |
| M5005_Spy_1719c | emm1.0  | NE | 1682099 | 1683553 | 484  | - | <a href="#">3571159</a> | COG1196D  | M protein                                     |  | * |
| M5005_Spy_1720c | mga     | NE | 1683738 | 1685327 | 529  | - | <a href="#">3571160</a> | -         | trans-acting positive regulator               |  | * |
| M5005_Spy_1721  | -       | NC | 1685712 | 1685897 | 61   | + | <a href="#">3571161</a> | -         | hypothetical protein M5005_Spy_1721           |  | * |
| M5005_Spy_1722c | -       | NE | 1686003 | 1686254 | 83   | - | <a href="#">3571162</a> | -         | hypothetical protein M5005_Spy_1722           |  | * |
| M5005_Spy_1723c | isp     | NE | 1686333 | 1687934 | 533  | - | <a href="#">3571163</a> | COG3942R  | hypothetical protein M5005_Spy_1723           |  | * |
| M5005_Spy_1724c | ihk     | NE | 1688036 | 1689424 | 462  | - | <a href="#">3571164</a> | COG0642T  | two component system histidine kinase         |  | * |



|                 |       |    |         |         |      |   |                         |           |                                                  |   |
|-----------------|-------|----|---------|---------|------|---|-------------------------|-----------|--------------------------------------------------|---|
| M5005_Spy_1725c | irr   | NE | 1689421 | 1690074 | 217  | - | <a href="#">3571165</a> | COG0745TK | two-component response regulator                 | * |
| M5005_Spy_1726c | -     | NE | 1690168 | 1691385 | 405  | - | <a href="#">3571166</a> | COG0577V  | ABC transporter permease                         | * |
| M5005_Spy_1727c | -     | NE | 1691398 | 1692072 | 224  | - | <a href="#">3571167</a> | COG1136V  | ABC transporter ATP-binding protein              | * |
| M5005_Spy_1728c | -     | NE | 1692059 | 1693327 | 422  | - | <a href="#">3571168</a> | COG0845M  | periplasmic protein of efflux system             | * |
| M5005_Spy_1729c | -     | NE | 1693750 | 1694154 | 134  | - | <a href="#">3571169</a> | -         | hypothetical protein M5005_Spy_1729              | * |
| M5005_Spy_1730c | -     | NE | 1694181 | 1694477 | 98   | - | <a href="#">3571170</a> | -         | hypothetical protein M5005_Spy_1730              | * |
| M5005_Spy_1731  | grm   | NE | 1694721 | 1694957 | 78   | + | <a href="#">3571171</a> | -         | hypothetical protein M5005_Spy_1731              | * |
| M5005_Spy_1732c | prsA  | C  | 1695233 | 1696162 | 309  | - | <a href="#">3571172</a> | COG0760O  | foldase PrsA                                     | * |
| M5005_Spy_1733c | -     | NE | 1696218 | 1696535 | 105  | - | <a href="#">3571173</a> | -         | hypothetical protein M5005_Spy_1733              | * |
| M5005_Spy_1734c | -     | NE | 1696642 | 1696947 | 101  | - | <a href="#">3571135</a> | -         | hypothetical protein M5005_Spy_1734              | * |
| M5005_Spy_1735c | speB  | NE | 1696949 | 1698145 | 398  | - | <a href="#">3571136</a> | -         | exotoxin B                                       | * |
| M5005_Spy_1736  | -     | NC | 1698670 | 1698801 | 43   | + | <a href="#">3571137</a> | -         | hypothetical protein M5005_Spy_1736              | * |
| M5005_Spy_1737  | rgg   | NE | 1699085 | 1699927 | 280  | + | <a href="#">3571138</a> | -         | transcriptional regulator                        | * |
| M5005_Spy_1738c | spd   | NE | 1700168 | 1700983 | 271  | - | <a href="#">3571139</a> | -         | phage-associated deoxyribonuclease               | * |
| M5005_Spy_1739  | -     | NC | 1701067 | 1701195 | 42   | + | <a href="#">3571140</a> | -         | hypothetical protein M5005_Spy_1739              | * |
| M5005_Spy_1740  | -     | NE | 1701347 | 1701856 | 169  | + | <a href="#">3571141</a> | COG1267I  | low temperature requirement C protein            | * |
| M5005_Spy_1741c | gldA  | NE | 1701938 | 1703026 | 362  | - | <a href="#">3571142</a> | COG0371C  | glycerol dehydrogenase                           | * |
| M5005_Spy_1742c | mipB  | NE | 1703083 | 1703751 | 222  | - | <a href="#">3571143</a> | COG0176G  | fructose-6-phosphate aldolase                    | * |
| M5005_Spy_1743c | pfiD  | NE | 1703764 | 1706136 | 790  | - | <a href="#">3571144</a> | COG1882C  | formate acetyltransferase                        | * |
| M5005_Spy_1744c | -     | NE | 1706391 | 1707695 | 434  | - | <a href="#">3571145</a> | COG1455G  | IIC                                              | * |
| M5005_Spy_1745c | -     | NE | 1707705 | 1708013 | 102  | - | <a href="#">3571146</a> | COG1440G  | IIB                                              | * |
| M5005_Spy_1746c | -     | NE | 1708041 | 1708361 | 106  | - | <a href="#">3571147</a> | COG1447G  | IIA                                              | * |
| M5005_Spy_1747c | -     | NE | 1708649 | 1709629 | 326  | - | <a href="#">3571148</a> | COG2390K  | sorbitol operon regulator                        | * |
| M5005_Spy_1748c | -     | NE | 1709645 | 1710394 | 249  | - | <a href="#">3571149</a> | COG1349KG | DeoR family transcriptional regulator            | * |
| M5005_Spy_1749  | -     | NE | 1710517 | 1711290 | 257  | + | <a href="#">3571150</a> | COG1180O  | pyruvate formate-lyase activating enzyme         | * |
| M5005_Spy_1750  | -     | NE | 1711325 | 1711525 | 66   | + | <a href="#">3571151</a> | -         | hypothetical protein M5005_Spy_1750              | * |
| M5005_Spy_1751c | secE  | NC | 1711527 | 1711703 | 58   | - | <a href="#">3571152</a> | COG0690U  | preprotein translocase subunit SecE              | * |
| M5005_Spy_1752c | rpmG  | NC | 1711717 | 1711869 | 50   | - | <a href="#">3571153</a> | COG0267J  | 50S ribosomal protein L33                        | * |
| M5005_Spy_1753c | pbp2A | NE | 1711918 | 1714254 | 778  | - | <a href="#">3571116</a> | COG0744M  | multimodular transpeptidase-transglycosylase     | * |
| M5005_Spy_1754c | -     | NE | 1714293 | 1714673 | 126  | - | <a href="#">3571117</a> | COG0251J  | translation initiation inhibitor                 | * |
| M5005_Spy_1755c | -     | NE | 1715164 | 1715355 | 63   | + | <a href="#">3571118</a> | -         | hypothetical protein M5005_Spy_1755              | * |
| M5005_Spy_1756  | -     | NE | 1715249 | 1716250 | 333  | + | <a href="#">3571119</a> | COG0564J  | ribosomal large subunit pseudouridine synthase D | * |
| M5005_Spy_1757c | -     | NE | 1716339 | 1717979 | 546  | - | <a href="#">3571120</a> | COG4640S  | hypothetical protein M5005_Spy_1757              | * |
| M5005_Spy_1758  | -     | NE | 1718226 | 1719722 | 498  | + | <a href="#">3571121</a> | COG4690E  | dipeptidase B                                    | * |
| M5005_Spy_1759c | -     | NE | 1720207 | 1720371 | 54   | - | <a href="#">3571122</a> | -         | MutR family transcriptional regulator            | * |
| M5005_Spy_1760c | -     | NE | 1720350 | 1720532 | 60   | - | <a href="#">3571123</a> | -         | MutR family transcriptional regulator            | * |
| M5005_Spy_1761c | groEL | E  | 1720925 | 1722556 | 543  | - | <a href="#">3571124</a> | COG0459O  | molecular chaperone GroEL                        | * |
| M5005_Spy_1762c | groES | E  | 1722592 | 1722882 | 96   | - | <a href="#">3571125</a> | COG0234O  | co-chaperonin GroES                              | * |
| M5005_Spy_1763c | clpC  | NE | 1723060 | 1725504 | 814  | - | <a href="#">3571126</a> | COG0542O  | negative regulator of genetic competence         | * |
| M5005_Spy_1764c | ctsR  | NE | 1725504 | 1725965 | 153  | - | <a href="#">3571127</a> | COG4463K  | transcriptional regulator                        | * |
| M5005_Spy_1765c | csp   | NE | 1726161 | 1726370 | 69   | - | <a href="#">3571128</a> | COG1278K  | cold shock protein                               | * |
| M5005_Spy_1766c | -     | NC | 1726507 | 1726611 | 34   | - | <a href="#">3571129</a> | -         | hypothetical protein M5005_Spy_1766              | * |
| M5005_Spy_1767c | -     | NE | 1726595 | 1727728 | 377  | - | <a href="#">3571130</a> | COG5433L  | transposase                                      | * |
| M5005_Spy_1768  | ahpC  | NE | 1728685 | 1729245 | 186  | + | <a href="#">3571132</a> | COG0450O  | peroxiredoxin reductase (NAD(P)H)                | * |
| M5005_Spy_1769  | ahpF  | NE | 1729266 | 1730798 | 510  | + | <a href="#">3571133</a> | COG3634O  | peroxiredoxin reductase (NAD(P)H)                | * |
| M5005_Spy_1770c | hutI  | NE | 1730856 | 1732121 | 421  | - | <a href="#">3571134</a> | COG1228Q  | imidazolonepropionase                            | * |
| M5005_Spy_1771  | hutU  | NE | 1732413 | 1734443 | 676  | + | <a href="#">3571097</a> | COG2987E  | urocanate hydratase                              | * |
| M5005_Spy_1772  | -     | NE | 1734532 | 1735431 | 299  | + | <a href="#">3571098</a> | COG3643E  | glutamate formiminotransferase                   | * |
| M5005_Spy_1773  | -     | NE | 1735442 | 1736068 | 208  | + | <a href="#">3571099</a> | COG3404E  | formiminotetrahydrofolate cyclodeaminase         | * |
| M5005_Spy_1774  | fhs.2 | NE | 1736086 | 1737759 | 557  | + | <a href="#">3571100</a> | COG2759F  | formate--tetrahydrofolate ligase                 | * |
| M5005_Spy_1775  | -     | NE | 1737781 | 1738377 | 198  | + | <a href="#">3571101</a> | COG3758S  | hypothetical protein M5005_Spy_1775              | * |
| M5005_Spy_1776  | -     | NE | 1738597 | 1739940 | 447  | + | <a href="#">3571102</a> | COG0531E  | amino acid permease                              | * |
| M5005_Spy_1777  | hutH  | NE | 1739951 | 1741492 | 513  | + | <a href="#">3571103</a> | COG2986E  | histidine ammonia-lyase                          | * |
| M5005_Spy_1778  | hutG  | NE | 1741678 | 1742664 | 328  | + | <a href="#">3571104</a> | COG0010E  | formimidoylglutamase                             | * |
| M5005_Spy_1779c | -     | NE | 1742695 | 1745769 | 1024 | - | <a href="#">3571105</a> | COG3899R  | LuxR family transcriptional regulator            | * |
| M5005_Spy_1780  | rpsB  | E  | 1746073 | 1746840 | 255  | + | <a href="#">3571106</a> | COG0052J  | 30S ribosomal protein S2                         | * |
| M5005_Spy_1781  | tsf   | E  | 1746974 | 1748014 | 346  | + | <a href="#">3571107</a> | COG0264J  | elongation factor Ts                             | * |
| M5005_Spy_1782c | pepO  | NE | 1748180 | 1750075 | 631  | - | <a href="#">3571108</a> | COG3590O  | neutral endopeptidase                            | * |
| M5005_Spy_1783c | dexS  | NC | 1750283 | 1751911 | 542  | - | <a href="#">3571109</a> | COG0366G  | trehalose-6-phosphate hydrolase                  | * |

|                 |           |    |         |         |     |   |                         |          |                                                 |   |
|-----------------|-----------|----|---------|---------|-----|---|-------------------------|----------|-------------------------------------------------|---|
| M5005_Spy_1784c | -         | NE | 1751978 | 1754002 | 674 | - | <a href="#">3571110</a> | COG1263G | PTS system, trehalose-specific IIBC component   | * |
| M5005_Spy_1785  | -         | NE | 1754213 | 1754926 | 237 | + | <a href="#">3571111</a> | COG2188K | trehalose operon transcriptional repressor      | * |
| M5005_Spy_1786c | -         | NE | 1755205 | 1755372 | 55  | - | <a href="#">3571112</a> | COG1733K | MarR family transcriptional regulator, partial  |   |
| M5005_Spy_1787  | -         | NE | 1755730 | 1756587 | 285 | + | <a href="#">3571113</a> | COG2514R | glyoxalase                                      |   |
| M5005_Spy_1788  | yaaA      | NE | 1756629 | 1757360 | 243 | + | <a href="#">3571114</a> | COG3022S | hypothetical protein M5005_Spy_1788             | * |
| M5005_Spy_1789c | nrdG      | NE | 1757534 | 1758148 | 204 | - | <a href="#">3571115</a> | COG0602O | activating protein                              | * |
| M5005_Spy_1790c | -         | NE | 1758148 | 1758657 | 169 | - | <a href="#">3571077</a> | COG3981R | acetyltransferase                               | * |
| M5005_Spy_1791c | -         | NC | 1758666 | 1759601 | 311 | - | <a href="#">3571078</a> | COG0673R | virulence factor                                | * |
| M5005_Spy_1792c | -         | NC | 1759630 | 1759776 | 48  | - | <a href="#">3571079</a> | -        | hypothetical protein M5005_Spy_1792             |   |
| M5005_Spy_1793c | nrdD      | C  | 1759958 | 1762156 | 732 | - | <a href="#">3571080</a> | COG1328F | anaerobic ribonucleoside triphosphate reductase | * |
| M5005_Spy_1794c | -         | NE | 1762253 | 1763812 | 519 | - | <a href="#">3571081</a> | COG1807M | hypothetical protein M5005_Spy_1794             | * |
| M5005_Spy_1795c | -         | NE | 1764225 | 1764530 | 101 | - | <a href="#">3571082</a> | COG3906S | hypothetical protein M5005_Spy_1795             | * |
| M5005_Spy_1796c | -         | E  | 1764542 | 1764961 | 139 | - | <a href="#">3571083</a> | COG0816L | Holliday junction resolvase-like protein        | * |
| M5005_Spy_1797c | -         | NE | 1764958 | 1765227 | 89  | - | <a href="#">3571084</a> | COG4472S | hypothetical protein M5005_Spy_1797             |   |
| M5005_Spy_1798c | spxA      | C  | 1765340 | 1765738 | 132 | - | <a href="#">3571085</a> | COG1393P | Spx family transcriptional regulator            | * |
| M5005_Spy_1799c | recA      | NE | 1766029 | 1767165 | 378 | - | <a href="#">3571086</a> | COG0468L | recombinase A                                   | * |
| M5005_Spy_1800c | cinA      | NE | 1767254 | 1768525 | 423 | - | <a href="#">3571087</a> | COG1058R | competence damage-inducible protein A           | * |
| M5005_Spy_1801c | tag       | NC | 1768594 | 1769154 | 186 | - | <a href="#">3571088</a> | COG2818L | DNA-3-methyladenine glycosylase                 | * |
| M5005_Spy_1802c | ruvA      | NC | 1769164 | 1769760 | 198 | - | <a href="#">3571089</a> | COG0632L | Holliday junction DNA helicase RuvA             | * |
| M5005_Spy_1803c | lmrP      | NE | 1769762 | 1770982 | 406 | - | <a href="#">3571090</a> | COG2814G | multidrug resistance protein B                  | * |
| M5005_Spy_1804c | mutL      | NC | 1770993 | 1772975 | 660 | - | <a href="#">3571091</a> | COG0323L | DNA mismatch repair protein                     | * |
| M5005_Spy_1805c | mutS      | NC | 1773104 | 1775659 | 851 | - | <a href="#">3571092</a> | COG0249L | DNA mismatch repair protein MutS                | * |
| M5005_Spy_1806c | -         | NE | 1775646 | 1775852 | 68  | - | <a href="#">3571093</a> | COG4550S | hypothetical protein M5005_Spy_1806             |   |
| M5005_Spy_1807c | argR2     | NE | 1775995 | 1776432 | 145 | - | <a href="#">3571094</a> | COG1438K | arginine repressor ArgR                         | * |
| M5005_Spy_1808  | argS      | E  | 1776723 | 1778414 | 563 | + | <a href="#">3571095</a> | COG0018J | arginyl-tRNA synthetase                         | * |
| M5005_Spy_1809  | uviB      | NE | 1778502 | 1778810 | 102 | + | <a href="#">3571096</a> | -        | bacteriocin                                     | * |
| M5005_Spy_1810c | -         | NE | 1778837 | 1779709 | 290 | - | <a href="#">3571058</a> | COG1284S | hypothetical protein M5005_Spy_1810             | * |
| M5005_Spy_1811c | -         | NE | 1779752 | 1780687 | 311 | - | <a href="#">3571059</a> | COG1284S | hypothetical protein M5005_Spy_1811             | * |
| M5005_Spy_1812c | -         | NE | 1780650 | 1781591 | 313 | - | <a href="#">3571060</a> | COG1284S | hypothetical protein M5005_Spy_1812             | * |
| M5005_Spy_1813c | aspS      | E  | 1781584 | 1783332 | 582 | - | <a href="#">3571061</a> | COG0173J | aspartyl-tRNA synthetase                        | * |
| M5005_Spy_1814c | hisS      | E  | 1783670 | 1784950 | 426 | - | <a href="#">3571062</a> | COG0124J | histidyl-tRNA synthetase                        | * |
| M5005_Spy_1815  | rpmF      | NE | 1785170 | 1785352 | 60  | + | <a href="#">3571063</a> | COG0333J | 50S ribosomal protein L32                       |   |
| M5005_Spy_1816  | rpmG      | NC | 1785368 | 1785517 | 49  | + | <a href="#">3571064</a> | COG0267J | 50S ribosomal protein L33                       |   |
| M5005_Spy_1817  | cadD      | NE | 1785810 | 1786424 | 204 | + | <a href="#">3571065</a> | COG4300P | cadmium resistance protein                      | * |
| M5005_Spy_1818  | cadC      | NE | 1786406 | 1786774 | 122 | + | <a href="#">3571066</a> | COG0640K | cadmium efflux system accessory protein         | * |
| M5005_Spy_1819  | -         | NE | 1786825 | 1787748 | 307 | + | <a href="#">3571067</a> | -        | hypothetical protein M5005_Spy_1819             |   |
| M5005_Spy_1820  | -         | NE | 1787814 | 1788566 | 250 | + | <a href="#">3571068</a> | COG1674D | DNA translocase FtsK                            | * |
| M5005_Spy_1821  | -         | NE | 1788563 | 1789165 | 200 | + | <a href="#">3571069</a> | -        | hypothetical protein M5005_Spy_1821             | * |
| M5005_Spy_1822c | -         | NE | 1789641 | 1789925 | 94  | - | <a href="#">3571070</a> | -        | transcriptional regulator                       |   |
| M5005_Spy_1823  | -         | NE | 1790376 | 1791218 | 280 | + | <a href="#">3571071</a> | COG2035S | hypothetical protein M5005_Spy_1823             | * |
| M5005_Spy_1824c | -         | NE | 1791265 | 1791906 | 213 | - | <a href="#">3571072</a> | COG1051F | phosphohydrolase                                |   |
| M5005_Spy_1825  | -         | NE | 1792113 | 1792439 | 108 | + | <a href="#">3571073</a> | COG1695K | PadR family transcriptional regulator           | * |
| M5005_Spy_1826  | -         | NE | 1792426 | 1793013 | 195 | + | <a href="#">3571074</a> | COG4709S | hypothetical protein M5005_Spy_1826             | * |
| M5005_Spy_1827  | -         | NE | 1793010 | 1794089 | 359 | + | <a href="#">3571075</a> | -        | hypothetical protein M5005_Spy_1827             | * |
| M5005_Spy_1828c | -         | NE | 1794207 | 1796075 | 622 | - | <a href="#">3571076</a> | COG1511S | phage infection protein                         | * |
| M5005_Spy_1830  | -         | NE | 1796614 | 1797147 | 177 | + | <a href="#">3571039</a> | COG1309K | TetR family transcriptional regulator           | * |
| M5005_Spy_1831c | rpsD      | E  | 1797301 | 1797912 | 203 | - | <a href="#">3571040</a> | COG0522J | 30S ribosomal protein S4                        | * |
| M5005_Spy_1832c | -         | NC | 1798115 | 1798219 | 34  | - | <a href="#">3571041</a> | -        | hypothetical protein M5005_Spy_1832             |   |
| M5005_Spy_1833c | -         | NE | 1798203 | 1799336 | 377 | - | <a href="#">3571042</a> | COG5433L | transposase                                     |   |
| M5005_Spy_1834c | -         | NE | 1799968 | 1800240 | 90  | - | <a href="#">3571043</a> | COG4466S | hypothetical protein M5005_Spy_1834             | * |
| M5005_Spy_1835c | holB/dnaC | E  | 1800257 | 1801624 | 455 | - | <a href="#">3571044</a> | COG0305L | replicative DNA helicase                        | * |
| M5005_Spy_1836c | rplI      | NE | 1801654 | 1802106 | 150 | - | <a href="#">3571045</a> | COG0359J | 50S ribosomal protein L9                        | * |
| M5005_Spy_1837c | -         | NE | 1802103 | 1804079 | 658 | - | <a href="#">3571046</a> | COG3887T | phosphoesterase, DHH family protein             | * |
| M5005_Spy_1838c | gidA      | C  | 1804170 | 1806068 | 632 | - | <a href="#">3571047</a> | COG0445D | modification protein GidA                       | * |
| M5005_Spy_1839c | -         | NE | 1806192 | 1806509 | 105 | - | <a href="#">3571048</a> | COG1051F | phosphohydrolase                                | * |
| M5005_Spy_1840c | mnmA      | E  | 1807286 | 1808407 | 373 | - | <a href="#">3571049</a> | COG0482J | tRNA-specific 2-thiouridylase MnmA              | * |
| M5005_Spy_1841  | sdhB      | NE | 1808705 | 1809376 | 223 | + | <a href="#">3571050</a> | COG1760E | L-serine dehydratase                            | * |
| M5005_Spy_1842  | sdhA      | NE | 1809388 | 1810260 | 290 | + | <a href="#">3571051</a> | COG1760E | L-serine dehydratase                            | * |
| M5005_Spy_1843c | -         | NE | 1810673 | 1811287 | 204 | - | <a href="#">3571052</a> | COG0741M | transglycosylase                                | * |

|                 |      |           |         |         |     |   |                         |          |                                             |  |   |
|-----------------|------|-----------|---------|---------|-----|---|-------------------------|----------|---------------------------------------------|--|---|
| M5005_Spy_1844c | cbiQ | <b>C</b>  | 1811659 | 1812459 | 266 | - | <a href="#">3571053</a> | COG0619P | cobalt transporter                          |  | * |
| M5005_Spy_1845c | cbiO | <b>E</b>  | 1812452 | 1813294 | 280 | - | <a href="#">3571054</a> | COG1122P | cobalt ABC transporter ATP-binding protein  |  | * |
| M5005_Spy_1846c | cbiO | <b>E</b>  | 1813270 | 1814160 | 296 | - | <a href="#">3571055</a> | COG1122P | cobalt ABC transporter ATP-binding protein  |  | * |
| M5005_Spy_1847c | pgsA | <b>NC</b> | 1814111 | 1814653 | 180 | - | <a href="#">3571056</a> | COG0558I | phosphatidyltransferase                     |  | * |
| M5005_Spy_1848c | -    | <b>NE</b> | 1814667 | 1815692 | 341 | - | <a href="#">3571057</a> | COG1426S | hypothetical protein M5005_Spy_1848         |  | * |
| M5005_Spy_1849c | -    | <b>NE</b> | 1815742 | 1817031 | 429 | - | <a href="#">3571021</a> | COG0612R | zinc protease                               |  | * |
| M5005_Spy_1850c | -    | <b>NE</b> | 1817033 | 1818277 | 414 | - | <a href="#">3571022</a> | COG0612R | zinc protease                               |  | * |
| M5005_Spy_1851  | hasA | <b>NE</b> | 1818708 | 1819967 | 419 | + | <a href="#">3571023</a> | COG1215M | hyaluronan synthase                         |  |   |
| M5005_Spy_1852  | hasB | <b>NE</b> | 1820003 | 1821211 | 402 | + | <a href="#">3571024</a> | COG1004M | UDP-glucose 6-dehydrogenase                 |  |   |
| M5005_Spy_1853  | hasC | <b>NE</b> | 1821393 | 1822307 | 304 | + | <a href="#">3571025</a> | COG1210M | UTP-glucose-1-phosphate uridylyltransferase |  |   |
| M5005_Spy_1854  | -    | <b>NE</b> | 1822615 | 1823028 | 137 | + | <a href="#">3571026</a> | COG2501S | hypothetical protein M5005_Spy_1854         |  | * |
| M5005_Spy_1855  | recF | <b>NE</b> | 1823030 | 1824136 | 368 | + | <a href="#">3571027</a> | COG1195L | recombination protein F                     |  | * |
| M5005_Spy_1856c | -    | <b>NE</b> | 1824191 | 1825024 | 277 | - | <a href="#">3571028</a> | COG4975G | glucose uptake protein                      |  | * |
| M5005_Spy_1857c | guaB | <b>NE</b> | 1825256 | 1826737 | 493 | - | <a href="#">3571029</a> | COG0516F | inosine 5'-monophosphate dehydrogenase      |  | * |
| M5005_Spy_1858c | trsA | <b>E</b>  | 1827045 | 1828067 | 340 | - | <a href="#">3571030</a> | COG0180J | tryptophanyl-tRNA synthetase                |  | * |
| M5005_Spy_1859c | -    | <b>NC</b> | 1828159 | 1828284 | 41  | - | <a href="#">3571031</a> | -        | hypothetical protein M5005_Spy_1859         |  |   |
| M5005_Spy_1860  | -    | <b>NE</b> | 1828486 | 1829358 | 290 | + | <a href="#">3571032</a> | COG1284S | hypothetical protein M5005_Spy_1860         |  | * |
| M5005_Spy_1861  | -    | <b>NE</b> | 1829437 | 1831056 | 539 | + | <a href="#">3571033</a> | COG0488R | ABC transporter ATP-binding protein         |  | * |
| M5005_Spy_1862  | -    | <b>NE</b> | 1831139 | 1833715 | 858 | + | <a href="#">3571034</a> | COG4485S | ABC transporter permease                    |  | * |
| M5005_Spy_1863c | -    | <b>NE</b> | 1834881 | 1835162 | 93  | - | <a href="#">3571037</a> | COG2826L | transposase                                 |  |   |
| M5005_Spy_1864c | -    | <b>NE</b> | 1835744 | 1836223 | 159 | - | <a href="#">3571018</a> | COG1576S | rRNA large subunit methyltransferase        |  | * |
| M5005_Spy_1865  | htrA | <b>C</b>  | 1836435 | 1837658 | 407 | + | <a href="#">3571019</a> | COG0265O | protease Do                                 |  | * |
| M5005_Spy_1866  | parB | <b>NE</b> | 1837717 | 1838523 | 268 | + | <a href="#">3571020</a> | COG1475K | chromosome partitioning protein             |  | * |



**Table S5. Bayesian analysis of Tn-seq datasets for GAS M49 NZ131 grown *in vitro*.**

(a) Spy numbers from GAS NZ131 genome.

(b) When available, gene name is provided.

| Locus Tag(a) | Gene Name(b) | Start | Stop  | Length | Bayesian for T <sub>0</sub> |      | Bayesian for T <sub>1</sub> |      | Bayesian for T <sub>2</sub> |      |
|--------------|--------------|-------|-------|--------|-----------------------------|------|-----------------------------|------|-----------------------------|------|
|              |              |       |       |        | Z score                     | Call | Z score                     | Call | Z score                     | Call |
| Spy49_0001   | dnaA         | 232   | 1587  | 451    | 0.9995                      | E    | 1                           | E    | 0.7995                      | U    |
| Spy49_0002   | dnaN         | 1742  | 2878  | 378    | 1                           | E    | 0.99975                     | E    | 1                           | E    |
| Spy49_0003   | -            | 2953  | 3150  | 65     | 0                           | NE   | 0                           | NE   | 0                           | NE   |
| Spy49_0004   | -            | 3480  | 4595  | 371    | 0.00025                     | NE   | 0                           | NE   | 0                           | NE   |
| Spy49_0005   | pth          | 4665  | 5234  | 189    | 0.9995                      | E    | 1                           | E    | 1                           | E    |
| Spy49_0006   | trcF         | 5321  | 8740  | 1139   | 0.00025                     | NE   | 0                           | NE   | 0.00025                     | NE   |
| Spy49_0008   | -            | 8902  | 9174  | 90     | 0.00025                     | NE   | 0                           | NE   | 0                           | NE   |
| Spy49_0009   | divIC        | 9161  | 9532  | 123    | 0.21775                     | U    | 1                           | E    | 0.98775                     | U    |
| Spy49_0010   | -            | 9667  | 10953 | 428    | 0                           | NE   | 0                           | NE   | 0                           | NE   |
| Spy49_0011   | mesJ         | 10950 | 12236 | 428    | 0.996                       | E    | 1                           | E    | 1                           | E    |
| Spy49_0012   | hpt          | 12241 | 12783 | 180    | 0.00025                     | NE   | 0                           | NE   | 0.00025                     | NE   |
| Spy49_0013   | ftsH         | 12805 | 14784 | 659    | 0.99975                     | E    | 1                           | E    | 1                           | E    |
| Spy49_0014   | -            | 15041 | 16501 | 486    | 0.00025                     | NE   | 0                           | NE   | 0                           | NE   |
| Spy49_0015   | -            | 31169 | 32365 | 398    | 0.9945                      | E    | 1                           | E    | 0.99225                     | E    |
| Spy49_0016   | prsA         | 32618 | 33580 | 320    | 1                           | E    | 1                           | E    | 1                           | E    |
| Spy49_0017   | recO         | 33766 | 34521 | 251    | 0.00025                     | NE   | 0                           | NE   | 0                           | NE   |
| Spy49_0018   | -            | 34624 | 35631 | 335    | 0.04475                     | U    | 1                           | E    | 1                           | E    |
| Spy49_0019   | acp          | 35624 | 35866 | 80     | 0.99875                     | E    | 0.08725                     | U    | 0.9965                      | E    |
| Spy49_0020   | purC         | 35987 | 36721 | 244    | 0                           | NE   | 0                           | NE   | 0.004                       | NE   |
| Spy49_0021   | purL         | 36798 | 40571 | 1257   | 0.00975                     | NE   | 0                           | NE   | 0.01125                     | NE   |
| Spy49_0022   | purF         | 40805 | 42259 | 484    | 0                           | NE   | 0                           | NE   | 0.00025                     | NE   |
| Spy49_0023   | purM         | 42287 | 43309 | 340    | 0                           | NE   | 0                           | NE   | 0.00025                     | NE   |
| Spy49_0024   | purN         | 43477 | 44031 | 184    | 0                           | NE   | 0                           | NE   | 0.00075                     | NE   |
| Spy49_0025   | purH         | 44215 | 45762 | 515    | 0                           | NE   | 0                           | NE   | 0                           | NE   |
| Spy49_0026c  | -            | 45820 | 46944 | 374    | 0                           | NE   | 0                           | NE   | 0.00025                     | NE   |
| Spy49_0027   | purD         | 47107 | 48462 | 451    | 0                           | NE   | 0                           | NE   | 0.00025                     | NE   |
| Spy49_0028   | purE         | 48621 | 49232 | 203    | 0                           | NE   | 0                           | NE   | 0.002                       | NE   |
| Spy49_0029   | purK         | 49216 | 50292 | 358    | 0                           | NE   | 0                           | NE   | 0.00025                     | NE   |
| Spy49_0030   | -            | 50394 | 51875 | 493    | 0                           | NE   | 0                           | NE   | 0                           | NE   |
| Spy49_0031   | purB         | 52048 | 53340 | 430    | 0                           | NE   | 0                           | NE   | 0.01925                     | NE   |
| Spy49_0032   | -            | 53471 | 54391 | 306    | 0                           | NE   | 0                           | NE   | 0                           | NE   |
| Spy49_0033   | ruvB         | 54617 | 55615 | 332    | 0.01425                     | NE   | 0.90475                     | U    | 1                           | E    |
| Spy49_0035   | -            | 55753 | 56190 | 145    | 0                           | NE   | 0                           | NE   | 0                           | NE   |
| Spy49_0036   | -            | 56213 | 56614 | 133    | 0.00025                     | NE   | 0.99975                     | E    | 0.99625                     | E    |
| Spy49_0037   | -            | 56611 | 58386 | 591    | 0.666                       | U    | 1                           | E    | 1                           | E    |
| Spy49_0038   | adhE         | 58695 | 61337 | 880    | 0                           | NE   | 0                           | NE   | 0                           | NE   |
| Spy49_0039   | adhP         | 61589 | 62605 | 338    | 0                           | NE   | 0                           | NE   | 0                           | NE   |
| Spy49_0040   | norM         | 62993 | 64282 | 429    | 0                           | NE   | 0                           | NE   | 0                           | NE   |
| Spy49_0044   | rpsJ         | 64481 | 64789 | 102    | 0.9775                      | U    | 0.95575                     | U    | 0.004                       | NE   |
| Spy49_0045   | rplC         | 65037 | 65663 | 208    | 0.998                       | E    | 1                           | E    | 0.995                       | E    |
| Spy49_0046   | rplD         | 65687 | 66310 | 207    | 0.82225                     | U    | 1                           | E    | 0.0035                      | NE   |
| Spy49_0048   | rplW         | 66310 | 66540 | 76     | 0.95125                     | U    | 1                           | E    | 0.94925                     | U    |
| Spy49_0049   | rplB         | 66625 | 67458 | 277    | 1                           | E    | 1                           | E    | 1                           | E    |
| Spy49_0050   | rpsS         | 67597 | 67875 | 92     | 0.0005                      | NE   | 0.244                       | U    | 0.00075                     | NE   |
| Spy49_0052   | rplV         | 67891 | 68235 | 114    | 0.9925                      | U    | 1                           | E    | 0.64425                     | U    |
| Spy49_0053   | rpsC         | 68275 | 68901 | 208    | 0.987                       | U    | 1                           | E    | 0.9985                      | E    |
| Spy49_0054   | rplP         | 68905 | 69318 | 137    | 0.93375                     | U    | 0.99975                     | E    | 0.9955                      | E    |
| Spy49_0055   | rpmC         | 69328 | 69534 | 68     | 0.8785                      | U    | 0.99875                     | E    | 0.87975                     | U    |
| Spy49_0056   | rpsQ         | 69560 | 69820 | 86     | 0.9915                      | U    | 1                           | E    | 0.98825                     | U    |
| Spy49_0057   | rplN         | 69845 | 70213 | 122    | 0.99125                     | U    | 1                           | E    | 0.99                        | U    |
| Spy49_0058   | rplX         | 70292 | 70597 | 101    | 0.00025                     | NE   | 1                           | E    | 0.995                       | E    |
| Spy49_0059   | rplE         | 70621 | 71163 | 180    | 0.9995                      | E    | 1                           | E    | 0.01425                     | NE   |
| Spy49_0060   | rpsN.1       | 71179 | 71364 | 61     | 0.92125                     | U    | 0.13125                     | U    | 0.01                        | NE   |
| Spy49_0061   | rpsH         | 71515 | 71913 | 132    | 0.99525                     | E    | 1                           | E    | 0.98825                     | U    |
| Spy49_0062   | rplF         | 72116 | 72652 | 178    | 0.994                       | E    | 1                           | E    | 0.9935                      | E    |
| Spy49_0064   | rplR         | 72757 | 73113 | 118    | 0.987                       | U    | 1                           | E    | 0.98025                     | U    |
| Spy49_0065   | rpsE         | 73132 | 73626 | 164    | 0.99425                     | E    | 1                           | E    | 0.96625                     | U    |
| Spy49_0066   | rpmD         | 73641 | 73823 | 60     | 0.00025                     | NE   | 1                           | E    | 0.0005                      | NE   |
| Spy49_0067   | rplO         | 74038 | 74478 | 146    | 0.96925                     | U    | 0.9995                      | E    | 0.96575                     | U    |
| Spy49_0068   | secY         | 74495 | 75799 | 434    | 1                           | E    | 1                           | E    | 1                           | E    |
| Spy49_0069   | adk          | 75949 | 76587 | 212    | 0.99775                     | E    | 1                           | E    | 0.99975                     | E    |
| Spy49_0070   | infA         | 76705 | 76923 | 72     | 0.98475                     | U    | 1                           | E    | 0.03775                     | NE   |

|             |        |        |        |      |         |    |         |    |         |    |
|-------------|--------|--------|--------|------|---------|----|---------|----|---------|----|
| Spy49_0071  | rpmJ   | 76949  | 77065  | 38   | -1      | S  | -1      | S  | -1      | S  |
| Spy49_0072  | rpsM   | 77083  | 77448  | 121  | 0.0015  | NE | 1       | E  | 0.992   | E  |
| Spy49_0073  | rpsK   | 77466  | 77849  | 127  | 0.979   | U  | 0.0005  | NE | 0.94975 | U  |
| Spy49_0074  | rpoA   | 77895  | 78833  | 312  | 1       | E  | 1       | E  | 1       | E  |
| Spy49_0075  | rplQ   | 78848  | 79234  | 128  | 0.98375 | U  | 0.00575 | NE | 0.97975 | U  |
| Spy49_0078  | -      | 87367  | 87615  | 82   | 0       | NE | 0       | NE | 0.0185  | NE |
| Spy49_0079  | -      | 87670  | 87882  | 70   | 0.00175 | NE | 0       | NE | 0       | NE |
| Spy49_0080  | adrR   | 87992  | 88435  | 147  | 0.00025 | NE | 0       | NE | 0       | NE |
| Spy49_0081  | adrC   | 88439  | 89158  | 239  | 0.00025 | NE | 0       | NE | 0.1085  | U  |
| Spy49_0082  | adrB   | 89151  | 89966  | 271  | 0       | NE | 0       | NE | 0.62175 | U  |
| Spy49_0083c | -      | 90006  | 90389  | 127  | 0       | NE | 0       | NE | 0       | NE |
| Spy49_0084  | tyrS   | 90440  | 91696  | 418  | 0.941   | U  | 1       | E  | 1       | E  |
| Spy49_0086  | pbp1b  | 91800  | 94100  | 766  | 0.00025 | NE | 0       | NE | 0.00075 | NE |
| Spy49_0087  | rpoB   | 94364  | 97930  | 1188 | 1       | E  | 1       | E  | 1       | E  |
| Spy49_0088  | rpoC   | 98048  | 101662 | 1204 | 1       | E  | 1       | E  | 1       | E  |
| Spy49_0089  | -      | 101814 | 102179 | 121  | 0       | NE | 0       | NE | 0       | NE |
| Spy49_0090  | comYA  | 102272 | 103210 | 312  | 0.00025 | NE | 0       | NE | 0.00025 | NE |
| Spy49_0091  | comYB  | 103305 | 104180 | 291  | 0.00025 | NE | 0       | NE | 0       | NE |
| Spy49_0092  | comYC  | 104182 | 104508 | 108  | 0       | NE | 0       | NE | 0       | NE |
| Spy49_0093  | -      | 104483 | 104911 | 142  | 0.00025 | NE | 0       | NE | 0.00025 | NE |
| Spy49_0094  | -      | 104868 | 105152 | 94   | 0       | NE | 0       | NE | 0       | NE |
| Spy49_0095  | comYD  | 105145 | 105579 | 144  | 0.01125 | NE | 0       | NE | 0.00025 | NE |
| Spy49_0096  | -      | 105599 | 105889 | 96   | 0       | NE | 0       | NE | 0       | NE |
| Spy49_0097  | -      | 105987 | 106940 | 317  | 0.00025 | NE | 0       | NE | 0       | NE |
| Spy49_0098  | ackA   | 106999 | 108195 | 398  | 0.00025 | NE | 0       | NE | 0.587   | U  |
| Spy49_0099  | -      | 108381 | 108623 | 80   | 0       | NE | 0       | NE | 0.00025 | NE |
| Spy49_0100  | proC   | 108772 | 109542 | 256  | 0       | NE | 0       | NE | 0       | NE |
| Spy49_0101  | pepA   | 109590 | 110657 | 355  | 0       | NE | 0       | NE | 0.0005  | NE |
| Spy49_0103  | -      | 112439 | 112732 | 97   | 0       | NE | 0       | NE | 0       | NE |
| Spy49_0104  | trx.1  | 112729 | 113046 | 105  | 0.00025 | NE | 0       | NE | 0       | NE |
| Spy49_0105  | -      | 113064 | 113708 | 214  | 0       | NE | 0       | NE | 0       | NE |
| Spy49_0107  | ssb    | 113842 | 114237 | 131  | 0       | NE | 0       | NE | 0       | NE |
| Spy49_0108c | -      | 114497 | 115138 | 213  | 0.00025 | NE | 0       | NE | 0       | NE |
| Spy49_0109c | -      | 115158 | 116135 | 325  | 0       | NE | 0       | NE | 0.00025 | NE |
| Spy49_0110c | hsiO   | 116122 | 116994 | 290  | 0.00025 | NE | 0       | NE | 0       | NE |
| Spy49_0111  | nra    | 117120 | 118655 | 511  | 0.00025 | NE | 0       | NE | 0.00025 | NE |
| Spy49_0112  | cbp    | 119085 | 121319 | 744  | 0       | NE | 0       | NE | 0.00025 | NE |
| Spy49_0113  | lepA-1 | 121312 | 121833 | 173  | 0       | NE | 0       | NE | 0.00025 | NE |
| Spy49_0114  | -      | 121855 | 122889 | 344  | 0       | NE | 0       | NE | 0.00025 | NE |
| Spy49_0116  | -      | 122905 | 123630 | 241  | 0       | NE | 0       | NE | 0.00025 | NE |
| Spy49_0117  | -      | 123665 | 124234 | 189  | 0       | NE | 0       | NE | 0       | NE |
| Spy49_0118  | msmR   | 124394 | 125599 | 401  | 0       | NE | 0       | NE | 0       | NE |
| Spy49_0119  | prtF   | 125984 | 129466 | 1160 | 0       | NE | 0       | NE | 0       | NE |
| Spy49_0120c | -      | 129731 | 130396 | 221  | 0.00025 | NE | 0       | NE | 0       | NE |
| Spy49_0121  | atoE   | 130750 | 132156 | 468  | 0.00025 | NE | 0       | NE | 0.00025 | NE |
| Spy49_0122c | -      | 132231 | 133142 | 303  | 0       | NE | 0       | NE | 0       | NE |
| Spy49_0123  | -      | 133263 | 134447 | 394  | 0       | NE | 0       | NE | 0       | NE |
| Spy49_0124  | atoD.2 | 134459 | 135118 | 219  | 0       | NE | 0       | NE | 0       | NE |
| Spy49_0125  | -      | 135121 | 135768 | 215  | 0       | NE | 0       | NE | 0       | NE |
| Spy49_0126c | -      | 135890 | 136570 | 226  | 0       | NE | 0       | NE | 0       | NE |
| Spy49_0127  | -      | 136745 | 137110 | 121  | 0       | NE | 0       | NE | 0       | NE |
| Spy49_0128  | sloR   | 137147 | 138166 | 339  | 0       | NE | 0       | NE | 0.01125 | NE |
| Spy49_0129  | -      | 138620 | 138940 | 106  | 0       | NE | 0       | NE | 0       | NE |
| Spy49_0130  | ntpI   | 138930 | 140930 | 666  | 0       | NE | 0       | NE | 0.00025 | NE |
| Spy49_0131  | ntpK   | 140932 | 141411 | 159  | 0       | NE | 0       | NE | 0.00025 | NE |
| Spy49_0132  | ntpE   | 141479 | 142063 | 194  | 0.00025 | NE | 0       | NE | 0       | NE |
| Spy49_0133  | ntpC   | 142079 | 143077 | 332  | 0       | NE | 0       | NE | 0       | NE |
| Spy49_0134  | ntpG   | 143074 | 143394 | 106  | 0       | NE | 0       | NE | 0       | NE |
| Spy49_0135  | ntpA   | 143595 | 145370 | 591  | 0       | NE | 0       | NE | 0       | NE |
| Spy49_0136  | ntpB   | 145371 | 146786 | 471  | 0       | NE | 0       | NE | 0.00075 | NE |
| Spy49_0137  | ntpD   | 146831 | 147457 | 208  | 0       | NE | 0       | NE | 0       | NE |
| Spy49_0138c | -      | 147577 | 148839 | 420  | 0       | NE | 0       | NE | 0.00025 | NE |
| Spy49_0139c | -      | 148852 | 149730 | 292  | 0       | NE | 0       | NE | 0       | NE |
| Spy49_0141  | purA   | 150168 | 151460 | 430  | 0.00125 | NE | 0       | NE | 0       | NE |
| Spy49_0142  | -      | 151787 | 152830 | 347  | 0       | NE | 0       | NE | 0       | NE |
| Spy49_0143  | nusG   | 152988 | 153542 | 184  | 0.593   | U  | 0       | NE | 0.9595  | U  |
| Spy49_0144  | nga    | 153917 | 155272 | 451  | 0       | NE | 0       | NE | 0.0005  | NE |
| Spy49_0145  | -      | 155277 | 155762 | 161  | 0       | NE | 0       | NE | 0.00025 | NE |

|             |        |        |        |     |         |    |         |    |         |    |
|-------------|--------|--------|--------|-----|---------|----|---------|----|---------|----|
| Spy49_0146  | slo    | 155786 | 157501 | 571 | 0       | NE | 0       | NE | 0.00025 | NE |
| Spy49_0147  | -      | 157756 | 158184 | 142 | 0.99525 | E  | 0.50925 | U  | 0.00375 | NE |
| Spy49_0148  | -      | 158408 | 158701 | 97  | 0.00025 | NE | 0.3225  | U  | 0.00025 | NE |
| Spy49_0149c | -      | 158998 | 159165 | 55  | 0       | NE | 0       | NE | 0.00025 | NE |
| Spy49_0150c | -      | 159350 | 159676 | 108 | 0.99925 | E  | 1       | E  | 0.999   | E  |
| Spy49_0151  | metB   | 159929 | 161299 | 456 | 0       | NE | 0       | NE | 0       | NE |
| Spy49_0152  | leuS   | 161510 | 164011 | 833 | 1       | E  | 1       | E  | 1       | E  |
| Spy49_0153  | -      | 164318 | 165751 | 477 | 0       | NE | 0       | NE | 0       | NE |
| Spy49_0154  | -      | 165822 | 166100 | 92  | 0       | NE | 0       | NE | 0       | NE |
| Spy49_0155  | -      | 166223 | 166708 | 161 | 0       | NE | 0       | NE | 0       | NE |
| Spy49_0156  | ulaD   | 166799 | 167461 | 220 | 0       | NE | 0       | NE | 0.086   | U  |
| Spy49_0157  | -      | 167466 | 168329 | 287 | 0       | NE | 0       | NE | 0       | NE |
| Spy49_0158  | araD   | 168331 | 169035 | 234 | 0       | NE | 0       | NE | 0       | NE |
| Spy49_0159  | -      | 169361 | 171007 | 548 | 0       | NE | 0       | NE | 0       | NE |
| Spy49_0160  | -      | 171261 | 172352 | 363 | 0       | NE | 0       | NE | 0       | NE |
| Spy49_0161  | opuAA  | 172842 | 174038 | 398 | 0       | NE | 0       | NE | 0       | NE |
| Spy49_0162  | opuABC | 174054 | 175781 | 575 | 0       | NE | 0       | NE | 0       | NE |
| Spy49_0163  | polA   | 175912 | 178554 | 880 | 0.00025 | NE | 1       | E  | 1       | E  |
| Spy49_0164  | -      | 178732 | 179187 | 151 | 0       | NE | 0       | NE | 0       | NE |
| Spy49_0165  | -      | 179239 | 179706 | 155 | 0       | NE | 0       | NE | 0       | NE |
| Spy49_0166  | -      | 179862 | 180161 | 99  | 0       | NE | 0       | NE | 0       | NE |
| Spy49_0167  | -      | 180383 | 181717 | 444 | 0       | NE | 0       | NE | 0       | NE |
| Spy49_0168  | -      | 181710 | 182090 | 126 | 0       | NE | 0       | NE | 0       | NE |
| Spy49_0169  | -      | 182234 | 182443 | 69  | 0.0125  | NE | 0       | NE | 0       | NE |
| Spy49_0170c | -      | 182570 | 182785 | 71  | 0       | NE | 0       | NE | 0       | NE |
| Spy49_0173c | -      | 183427 | 183720 | 97  | 0       | NE | 0       | NE | 0       | NE |
| Spy49_0176  | -      | 183438 | 183638 | 290 | 0       | NE | 0       | NE | 0.00025 | NE |
| Spy49_0178c | -      | 185332 | 186204 | 148 | 0       | NE | 0       | NE | 0       | NE |
| Spy49_0180c | -      | 186865 | 187311 | 287 | 0       | NE | 0       | NE | 0       | NE |
| Spy49_0181  | -      | 187933 | 188796 | 380 | 0       | NE | 0       | NE | 0       | NE |
| Spy49_0182  | tgt    | 189015 | 190157 | 103 | 0       | NE | 0       | NE | 0       | NE |
| Spy49_0183  | -      | 190374 | 190685 | 179 | 0       | NE | 0       | NE | 0       | NE |
| Spy49_0184  | bioY   | 190689 | 191228 | 259 | 0       | NE | 0       | NE | 0       | NE |
| Spy49_0185  | -      | 191368 | 192147 | 171 | 0       | NE | 0       | NE | 0       | NE |
| Spy49_0186c | -      | 192147 | 192662 | 406 | 0       | NE | 0       | NE | 0.00025 | NE |
| Spy49_0187  | -      | 193276 | 194496 | 234 | 0.00025 | NE | 0       | NE | 0       | NE |
| Spy49_0188  | speG   | 194908 | 195612 | 449 | 1       | E  | 1       | E  | 1       | E  |
| Spy49_0189c | pgi    | 196067 | 197416 | 465 | 0       | NE | 0       | NE | 0       | NE |
| Spy49_0190  | -      | 197875 | 199272 | 223 | 0.00025 | NE | 0       | NE | 0.00025 | NE |
| Spy49_0191c | -      | 199964 | 200635 | 299 | 0.96075 | U  | 1       | E  | 1       | E  |
| Spy49_0192c | hasC.2 | 200734 | 201633 | 338 | 0.99975 | E  | 1       | E  | 1       | E  |
| Spy49_0193  | gpsA   | 201666 | 202682 | 68  | 0.00025 | NE | 0       | NE | 0       | NE |
| Spy49_0194  | -      | 203220 | 203426 | 568 | 0       | NE | 0       | NE | 0.62625 | U  |
| Spy49_0195  | -      | 203419 | 205125 | 594 | 0.00025 | NE | 0       | NE | 0.0065  | NE |
| Spy49_0198  | -      | 205128 | 206912 | 230 | 0       | NE | 0       | NE | 0       | NE |
| Spy49_0199  | -      | 207105 | 207797 | 152 | 0       | NE | 0       | NE | 0       | NE |
| Spy49_0200  | dut    | 207907 | 208365 | 464 | 0.00025 | NE | 0       | NE | 0.00025 | NE |
| Spy49_0201  | radA   | 208402 | 209796 | 165 | 0       | NE | 0.00075 | NE | 0.674   | U  |
| Spy49_0202  | -      | 209985 | 210482 | 236 | 0       | NE | 0       | NE | 0       | NE |
| Spy49_0203  | -      | 210613 | 211323 | 496 | 0.99875 | E  | 1       | E  | 1       | E  |
| Spy49_0204  | gltX   | 211506 | 212996 | 448 | 0.00025 | NE | 0       | NE | 0       | NE |
| Spy49_0205  | fasB   | 213347 | 214693 | 427 | 0.00025 | NE | 0       | NE | 0.1585  | U  |
| Spy49_0206  | -      | 214690 | 215973 | 246 | 0       | NE | 0       | NE | 0.00025 | NE |
| Spy49_0207  | fasA   | 215977 | 216717 | 119 | 0.988   | U  | 0.0005  | NE | 0.00025 | NE |
| Spy49_0208  | rnpA   | 217257 | 217616 | 269 | 0       | NE | 0       | NE | 0       | NE |
| Spy49_0209  | -      | 217600 | 218409 | 304 | 0.00025 | NE | 0       | NE | 0.98625 | U  |
| Spy49_0210  | -      | 218421 | 219335 | 44  | -1      | S  | -1      | S  | -1      | S  |
| Spy49_0211  | rpmH   | 219650 | 219784 | 234 | 0.00025 | NE | 0       | NE | 0       | NE |
| Spy49_0212  | -      | 220058 | 220762 | 439 | 0       | NE | 0       | NE | 0.00025 | NE |
| Spy49_0213  | -      | 220811 | 222130 | 295 | 0       | NE | 0       | NE | 0.00025 | NE |
| Spy49_0214  | -      | 222235 | 223122 | 276 | 0.00025 | NE | 0       | NE | 0.03225 | NE |
| Spy49_0215  | -      | 223135 | 223965 | 201 | 0       | NE | 0       | NE | 0.00025 | NE |
| Spy49_0216  | -      | 224179 | 224784 | 304 | 0       | NE | 0       | NE | 0       | NE |
| Spy49_0217  | nanH   | 224796 | 225710 | 312 | 0       | NE | 0       | NE | 0       | NE |
| Spy49_0218c | -      | 225732 | 226670 | 276 | 0       | NE | 0       | NE | 0       | NE |
| Spy49_0219  | -      | 226781 | 227611 | 274 | 0       | NE | 0       | NE | 0       | NE |
| Spy49_0220  | -      | 227863 | 228687 | 196 | 0       | NE | 0       | NE | 0.00025 | NE |
| Spy49_0221  | -      | 228659 | 229249 | 290 | 0       | NE | 0       | NE | 0.00025 | NE |

|             |       |        |        |      |         |    |         |    |         |    |
|-------------|-------|--------|--------|------|---------|----|---------|----|---------|----|
| Spy49_0223  | ksgA  | 229363 | 230235 | 290  | 0       | NE | 0       | NE | 0.00025 | NE |
| Spy49_0224  | engC  | 230662 | 231534 | 220  | 0       | NE | 0.61175 | U  | 0.97475 | U  |
| Spy49_0225  | rpe   | 231544 | 232206 | 210  | 0       | NE | 0       | NE | 0.00025 | NE |
| Spy49_0226  | -     | 232199 | 232831 | 423  | 0.00025 | NE | 0       | NE | 0.0005  | NE |
| Spy49_0227  | -     | 232833 | 234104 | 312  | 0       | NE | 0       | NE | 0       | NE |
| Spy49_0228  | cbf   | 234094 | 235032 | 279  | 0.00025 | NE | 0       | NE | 0       | NE |
| Spy49_0229  | purR  | 235298 | 236137 | 873  | 0       | NE | 0       | NE | 0       | NE |
| Spy49_0230  | prgA  | 236128 | 238749 | 134  | 0.01    | NE | 1       | E  | 0.96225 | U  |
| Spy49_0231  | rpsL  | 238963 | 239367 | 156  | 0.9985  | E  | 1       | E  | 0.996   | E  |
| Spy49_0233  | rpsG  | 239388 | 239858 | 692  | 1       | E  | 1       | E  | 1       | E  |
| Spy49_0234  | fusA  | 240225 | 242303 | 336  | 0.99875 | E  | 1       | E  | 1       | E  |
| Spy49_0235c | plr   | 242651 | 243661 | 38   | -1      | S  | -1      | S  | -1      | S  |
| Spy49_0236c | -     | 243887 | 244003 | 246  | 0.0035  | NE | 0       | NE | 0       | NE |
| Spy49_0237c | -     | 244145 | 244885 | 498  | 0.00025 | NE | 0       | NE | 0.0005  | NE |
| Spy49_0238  | -     | 244951 | 246447 | 604  | 0       | NE | 0       | NE | 0.00025 | NE |
| Spy49_0239  | -     | 246645 | 248459 | 279  | 0.00025 | NE | 0       | NE | 0.00025 | NE |
| Spy49_0240  | bacA  | 248637 | 249476 | 253  | 0       | NE | 0       | NE | 0.00025 | NE |
| Spy49_0241  | mecA  | 249622 | 250383 | 389  | 0.99975 | E  | 1       | E  | 1       | E  |
| Spy49_0242  | rgpG  | 250390 | 251559 | 256  | 0       | NE | 0       | NE | 0.97375 | U  |
| Spy49_0243  | -     | 251681 | 252451 | 420  | 0.00025 | NE | 0       | NE | 0.9965  | E  |
| Spy49_0244  | -     | 252546 | 253808 | 408  | 0       | NE | 0       | NE | 0.4695  | U  |
| Spy49_0245  | -     | 253839 | 255065 | 159  | 0       | NE | 0       | NE | 0.2945  | U  |
| Spy49_0246  | -     | 255052 | 255531 | 472  | 0.00025 | NE | 0       | NE | 0.8825  | U  |
| Spy49_0247  | -     | 255524 | 256942 | 393  | 0       | NE | 0       | NE | 0       | NE |
| Spy49_0248c | pbp7  | 257094 | 258275 | 395  | 0       | NE | 0       | NE | 0.00025 | NE |
| Spy49_0249  | dacA  | 258489 | 259676 | 656  | 0       | NE | 0       | NE | 0       | NE |
| Spy49_0250  | oppA  | 260007 | 261977 | 500  | 0       | NE | 0       | NE | 0       | NE |
| Spy49_0251  | oppB  | 262042 | 263544 | 308  | 0.00025 | NE | 0       | NE | 0       | NE |
| Spy49_0252  | oppC  | 263544 | 264470 | 356  | 0       | NE | 0       | NE | 0       | NE |
| Spy49_0253  | oppD  | 264479 | 265549 | 307  | 0       | NE | 0       | NE | 0       | NE |
| Spy49_0254c | oppF  | 265542 | 266465 | 79   | 0       | NE | 0       | NE | 0       | NE |
| Spy49_0256  | -     | 266613 | 266852 | 161  | 0       | NE | 0       | NE | 0       | NE |
| Spy49_0257  | comX1 | 272853 | 273338 | 194  | 0.01875 | NE | 0.9105  | U  | 1       | E  |
| Spy49_0258  | -     | 273839 | 274423 | 373  | 0.9945  | E  | 1       | E  | 1       | E  |
| Spy49_0259  | -     | 274423 | 275544 | 102  | 0       | NE | 0       | NE | 0.00025 | NE |
| Spy49_0260  | -     | 275569 | 275877 | 210  | 0.02375 | NE | 1       | E  | 0.79075 | U  |
| Spy49_0261  | nadD  | 275946 | 276578 | 197  | 0.00075 | NE | 0       | NE | 0.00025 | NE |
| Spy49_0262  | -     | 276575 | 277168 | 125  | 0       | NE | 0       | NE | 0       | NE |
| Spy49_0263  | -     | 277168 | 277545 | 247  | 0       | NE | 0       | NE | 0.00025 | NE |
| Spy49_0264  | -     | 277593 | 278336 | 368  | 0       | NE | 0       | NE | 0       | NE |
| Spy49_0265  | -     | 278558 | 279664 | 238  | 0       | NE | 0       | NE | 0       | NE |
| Spy49_0266  | -     | 280146 | 280862 | 215  | 0       | NE | 0       | NE | 0.98175 | U  |
| Spy49_0268  | atmA  | 281260 | 281907 | 281  | 0       | NE | 0       | NE | 0       | NE |
| Spy49_0269  | atmB  | 282234 | 283079 | 354  | 0       | NE | 0       | NE | 0.00025 | NE |
| Spy49_0270  | atmD  | 283329 | 284393 | 230  | 0       | NE | 0       | NE | 0.00025 | NE |
| Spy49_0271c | atmE  | 284394 | 285086 | 444  | 0       | NE | 0       | NE | 0       | NE |
| Spy49_0272  | braB  | 285140 | 286474 | 379  | 0.00025 | NE | 0       | NE | 0       | NE |
| Spy49_0273c | -     | 286820 | 287959 | 224  | 0.89775 | U  | 1       | E  | 0.99975 | E  |
| Spy49_0274c | -     | 288014 | 288688 | 463  | 0.89875 | U  | 1       | E  | 1       | E  |
| Spy49_0275  | -     | 288698 | 290089 | 237  | 0.00025 | NE | 0       | NE | 0       | NE |
| Spy49_0276  | gidB  | 290158 | 290871 | 185  | 0       | NE | 0       | NE | 0.00025 | NE |
| Spy49_0277  | lemA  | 291021 | 291578 | 298  | 0       | NE | 0       | NE | 0.00025 | NE |
| Spy49_0278  | htpX  | 291625 | 292521 | 177  | 0.00025 | NE | 0       | NE | 0       | NE |
| Spy49_0279  | -     | 292755 | 293288 | 228  | 0.99975 | E  | 1       | E  | 0.98625 | U  |
| Spy49_0280  | csrR  | 293555 | 294241 | 500  | 0.0005  | NE | 1       | E  | 1       | E  |
| Spy49_0281  | csrS  | 294247 | 295749 | 164  | 0.69775 | U  | 0       | NE | 0.996   | E  |
| Spy49_0282  | nrdR  | 295964 | 296458 | 391  | 0.99975 | E  | 1       | E  | 1       | E  |
| Spy49_0283  | dnaB  | 296442 | 297617 | 300  | 0.99575 | E  | 1       | E  | 0.99975 | E  |
| Spy49_0284  | dnal  | 297618 | 298520 | 436  | 1       | E  | 1       | E  | 1       | E  |
| Spy49_0285  | engA  | 298583 | 299893 | 1032 | 0.042   | U  | 0       | NE | 0.1135  | U  |
| Spy49_0286  | snf   | 300100 | 303198 | 200  | 0       | NE | 0       | NE | 0       | NE |
| Spy49_0287  | -     | 303442 | 304044 | 442  | 1       | E  | 1       | E  | 1       | E  |
| Spy49_0288  | murC  | 304084 | 305412 | 160  | 0       | NE | 0       | NE | 0       | NE |
| Spy49_0289  | -     | 305458 | 305940 | 522  | 0.00025 | NE | 0       | NE | 0.38975 | U  |
| Spy49_0290  | -     | 306058 | 307626 | 176  | 0.00025 | NE | 0       | NE | 0.123   | U  |
| Spy49_0291  | greA  | 307651 | 308181 | 307  | 1       | E  | 1       | E  | 1       | E  |
| Spy49_0292c | oxaA  | 308800 | 309723 | 92   | 0       | NE | 0       | NE | 0       | NE |
| Spy49_0293  | -     | 309805 | 310083 | 245  | 0       | NE | 0       | NE | 0       | NE |

|             |        |        |        |      |         |    |         |    |         |    |
|-------------|--------|--------|--------|------|---------|----|---------|----|---------|----|
| Spy49_0294  | -      | 310344 | 311081 | 166  | 0       | NE | 0       | NE | 0       | NE |
| Spy49_0295  | -      | 311120 | 311620 | 229  | 0.422   | U  | 0       | NE | 0.65875 | U  |
| Spy49_0296  | -      | 311635 | 312324 | 80   | 0.98775 | U  | 1       | E  | 0.9805  | U  |
| Spy49_0297  | -      | 312502 | 312744 | 264  | 0.99625 | E  | 1       | E  | 1       | E  |
| Spy49_0298  | glr    | 312922 | 313716 | 328  | 0.00025 | NE | 0       | NE | 0       | NE |
| Spy49_0299  | -      | 313713 | 314699 | 173  | 0.00025 | NE | 0       | NE | 0       | NE |
| Spy49_0300  | -      | 314678 | 315199 | 153  | 0.00025 | NE | 0       | NE | 0.00025 | NE |
| Spy49_0301  | -      | 315196 | 315657 | 248  | 0.00025 | NE | 0       | NE | 0.00025 | NE |
| Spy49_0302  | xerD   | 315654 | 316400 | 234  | 0.00025 | NE | 0       | NE | 0.00025 | NE |
| Spy49_0303  | scpA   | 316400 | 317104 | 183  | 0       | NE | 0       | NE | 0.0005  | NE |
| Spy49_0304  | scpB   | 317101 | 317652 | 240  | 0       | NE | 0       | NE | 0       | NE |
| Spy49_0305  | rluB   | 317773 | 318495 | 86   | 0       | NE | 0       | NE | 0.0035  | NE |
| Spy49_0306  | -      | 318495 | 318755 | 182  | 0.00025 | NE | 0       | NE | 0.00025 | NE |
| Spy49_0307  | -      | 318933 | 319481 | 178  | 0.00025 | NE | 0.00025 | NE | 0.00075 | NE |
| Spy49_0308  | -      | 319792 | 320328 | 152  | 0.00025 | NE | 0       | NE | 0.00025 | NE |
| Spy49_0309  | -      | 320553 | 321011 | 306  | 0.00025 | NE | 0       | NE | 0.00025 | NE |
| Spy49_0310  | -      | 321303 | 322223 | 184  | 0       | NE | 0       | NE | 0.00025 | NE |
| Spy49_0311  | -      | 322262 | 322816 | 444  | 0.00025 | NE | 0       | NE | 0.00025 | NE |
| Spy49_0312  | hlyX   | 322950 | 324284 | 287  | 0       | NE | 0       | NE | 0       | NE |
| Spy49_0313  | pflC   | 324290 | 325153 | 311  | 1       | E  | 1       | E  | 1       | E  |
| Spy49_0314  | -      | 325284 | 326219 | 217  | 0       | NE | 0       | NE | 0.00025 | NE |
| Spy49_0315  | -      | 326295 | 326948 | 345  | 0.00025 | NE | 0       | NE | 0       | NE |
| Spy49_0316  | fhuG   | 326993 | 328030 | 350  | 0       | NE | 0       | NE | 0.00025 | NE |
| Spy49_0317c | fhuB1  | 327991 | 329043 | 310  | 0       | NE | 0       | NE | 0.00025 | NE |
| Spy49_0318  | fhuD   | 329033 | 329965 | 260  | 0       | NE | 0       | NE | 0.00025 | NE |
| Spy49_0319c | fhuC1  | 329991 | 330773 | 481  | 1       | E  | 1       | E  | 1       | E  |
| Spy49_0320  | murE   | 331019 | 332464 | 544  | 1       | E  | 1       | E  | 1       | E  |
| Spy49_0322  | -      | 332552 | 334186 | 209  | 0       | NE | 0       | NE | 0       | NE |
| Spy49_0323  | upp    | 334353 | 334982 | 196  | 0.07225 | U  | 0.99575 | E  | 0.999   | E  |
| Spy49_0325  | clpP   | 335206 | 335796 | 91   | 0       | NE | 0       | NE | 0       | NE |
| Spy49_0326  | -      | 336288 | 336563 | 211  | 0.5155  | U  | 1       | E  | 0.99775 | E  |
| Spy49_0327  | tmk    | 336812 | 337447 | 291  | 0.972   | U  | 1       | E  | 1       | E  |
| Spy49_0328  | -      | 337465 | 338340 | 53   | -1      | S  | -1      | S  | -1      | S  |
| Spy49_0329  | -      | 338688 | 338849 | 107  | 0.00025 | NE | 0.0405  | NE | 0.99325 | E  |
| Spy49_0330  | -      | 339004 | 339327 | 287  | 0.13275 | U  | 0.00025 | NE | 1       | E  |
| Spy49_0331  | -      | 339332 | 340195 | 130  | 0       | NE | 0       | NE | 0       | NE |
| Spy49_0332c | -      | 340222 | 340614 | 209  | 0.00025 | NE | 0       | NE | 0.00025 | NE |
| Spy49_0333  | -      | 340661 | 341290 | 118  | 0.00025 | NE | 0       | NE | 0       | NE |
| Spy49_0334c | -      | 341597 | 341953 | 303  | 0.00025 | NE | 0       | NE | 0.00025 | NE |
| Spy49_0335  | exoA   | 342027 | 342938 | 393  | 0.00025 | NE | 0       | NE | 0.00025 | NE |
| Spy49_0336  | lctO   | 343088 | 344269 | 1621 | 0       | NE | 0       | NE | 0.005   | NE |
| Spy49_0337  | prtS   | 344611 | 349476 | 217  | 0.00025 | NE | 0       | NE | 0       | NE |
| Spy49_0338  | -      | 350303 | 350956 | 666  | 1       | E  | 1       | E  | 1       | E  |
| Spy49_0339  | metS   | 351196 | 353196 | 337  | 0.00025 | NE | 0       | NE | 0.00025 | NE |
| Spy49_0340  | nrdF.2 | 353694 | 354707 | 162  | 0       | NE | 0       | NE | 0       | NE |
| Spy49_0341  | nrdI   | 354711 | 355199 | 726  | 0       | NE | 0       | NE | 0       | NE |
| Spy49_0342c | nrdE.2 | 355166 | 357346 | 250  | 0       | NE | 0       | NE | 0.00125 | NE |
| Spy49_0343  | -      | 357508 | 358260 | 72   | -1      | S  | -1      | S  | -1      | S  |
| Spy49_0344  | -      | 358946 | 359164 | 67   | -1      | S  | -1      | S  | -1      | S  |
| Spy49_0345c | -      | 359112 | 359315 | 65   | 0.0005  | NE | 0       | NE | 0       | NE |
| Spy49_0346c | -      | 359568 | 359765 | 277  | 0.00025 | NE | 0       | NE | 0.0005  | NE |
| Spy49_0347  | -      | 360026 | 360859 | 89   | 0       | NE | 0       | NE | 0       | NE |
| Spy49_0348  | -      | 361343 | 361612 | 134  | 0       | NE | 0       | NE | 0       | NE |
| Spy49_0349c | -      | 362242 | 362646 | 129  | 0       | NE | 0       | NE | 0       | NE |
| Spy49_0350c | -      | 363232 | 363621 | 230  | 0       | NE | 0       | NE | 0       | NE |
| Spy49_0351c | -      | 364340 | 365032 | 60   | 0       | NE | 0       | NE | 0.00075 | NE |
| Spy49_0352c | -      | 365190 | 365372 | 61   | 0.03075 | NE | 0       | NE | 0.00025 | NE |
| Spy49_0353c | -      | 365511 | 365696 | 122  | 0       | NE | 0       | NE | 0.00025 | NE |
| Spy49_0354c | -      | 365740 | 366108 | 57   | -1      | S  | -1      | S  | -1      | S  |
| Spy49_0355c | -      | 366083 | 366256 | 137  | 0       | NE | 0       | NE | 0       | NE |
| Spy49_0356c | -      | 366619 | 367032 | 168  | 0       | NE | 0       | NE | 0.00025 | NE |
| Spy49_0357c | -      | 367138 | 367644 | 109  | 0.00025 | NE | 0       | NE | 0       | NE |
| Spy49_0358c | -      | 367681 | 368010 | 200  | 0       | NE | 0       | NE | 0.00025 | NE |
| Spy49_0359c | -      | 368000 | 368602 | 88   | 0       | NE | 0       | NE | 0       | NE |
| Spy49_0360c | -      | 368868 | 369134 | 57   | 0       | NE | 0       | NE | 0       | NE |
| Spy49_0361c | -      | 369315 | 369488 | 562  | 0       | NE | 0       | NE | 0       | NE |
| Spy49_0362c | -      | 369776 | 371464 | 285  | 0.00025 | NE | 0       | NE | 0.00025 | NE |
| Spy49_0363c | -      | 371433 | 372290 | 92   | 0.0345  | NE | 0       | NE | 0.00025 | NE |

|             |      |        |        |     |         |    |         |    |         |    |
|-------------|------|--------|--------|-----|---------|----|---------|----|---------|----|
| Spy49_0364c | -    | 372434 | 372712 | 37  | -1      | S  | -1      | S  | -1      | S  |
| Spy49_0365c | -    | 372715 | 372828 | 64  | 0       | NE | 0       | NE | 0       | NE |
| Spy49_0366c | -    | 373055 | 373249 | 69  | 0       | NE | 0       | NE | 0       | NE |
| Spy49_0367c | -    | 373246 | 373455 | 82  | 0       | NE | 0       | NE | 0       | NE |
| Spy49_0368c | -    | 373980 | 374228 | 61  | 0       | NE | 0       | NE | 0       | NE |
| Spy49_0369  | -    | 374244 | 374429 | 222 | 1       | E  | 1       | E  | 1       | E  |
| Spy49_0370  | -    | 374597 | 375265 | 381 | 0       | NE | 0       | NE | 0       | NE |
| Spy49_0371  | -    | 375347 | 376492 | 78  | 0       | NE | 0       | NE | 0       | NE |
| Spy49_0372  | -    | 377362 | 377598 | 232 | 0       | NE | 0       | NE | 0.00025 | NE |
| Spy49_0373  | fabG | 377591 | 378289 | 319 | 0       | NE | 0       | NE | 0       | NE |
| Spy49_0374  | -    | 378365 | 379324 | 445 | 0       | NE | 0       | NE | 0       | NE |
| Spy49_0375  | glpT | 379657 | 380994 | 460 | 0.99925 | E  | 1       | E  | 1       | E  |
| Spy49_0376  | glmU | 381167 | 382549 | 184 | 0       | NE | 0       | NE | 0       | NE |
| Spy49_0377  | -    | 382580 | 383134 | 83  | 0       | NE | 0       | NE | 0       | NE |
| Spy49_0378  | -    | 383134 | 383385 | 231 | 0.85825 | U  | 1       | E  | 0.9835  | U  |
| Spy49_0379  | pfs  | 383405 | 384100 | 113 | 0       | NE | 0       | NE | 0       | NE |
| Spy49_0380c | -    | 384251 | 384592 | 215 | 0       | NE | 0       | NE | 0.8575  | U  |
| Spy49_0381  | -    | 384689 | 385336 | 274 | 0.03475 | NE | 0       | NE | 0       | NE |
| Spy49_0382  | mtsA | 385590 | 386414 | 241 | 0.01325 | NE | 0       | NE | 0       | NE |
| Spy49_0383  | mtsB | 386478 | 387203 | 284 | 0       | NE | 0       | NE | 0       | NE |
| Spy49_0384c | mtsC | 387204 | 388058 | 268 | 0.00025 | NE | 0       | NE | 0.00025 | NE |
| Spy49_0385  | cypB | 388206 | 389012 | 801 | 1       | E  | 1       | E  | 1       | E  |
| Spy49_0386c | ftsK | 389229 | 391634 | 116 | 0.00025 | NE | 0       | NE | 0       | NE |
| Spy49_0387  | -    | 391704 | 392054 | 141 | 0.02    | NE | 0.9995  | E  | 0.982   | U  |
| Spy49_0388  | rplK | 392301 | 392726 | 229 | 1       | E  | 1       | E  | 0.9995  | E  |
| Spy49_0390  | rplA | 392832 | 393521 | 242 | 1       | E  | 1       | E  | 1       | E  |
| Spy49_0391  | pyrH | 393843 | 394571 | 185 | 0.44075 | U  | 1       | E  | 0.99725 | E  |
| Spy49_0392  | frr  | 394600 | 395157 | 285 | 0       | NE | 0       | NE | 0       | NE |
| Spy49_0394  | -    | 395266 | 396123 | 169 | 0       | NE | 0       | NE | 0       | NE |
| Spy49_0395  | mrsA | 396196 | 396705 | 71  | 0       | NE | 0       | NE | 0       | NE |
| Spy49_0396  | -    | 396702 | 396917 | 389 | 0       | NE | 0       | NE | 0       | NE |
| Spy49_0398  | -    | 397073 | 398242 | 603 | 0       | NE | 0       | NE | 0       | NE |
| Spy49_0399  | -    | 398517 | 400328 | 350 | 0       | NE | 0       | NE | 0       | NE |
| Spy49_0400  | phoH | 400487 | 401539 | 191 | 0       | NE | 0       | NE | 0       | NE |
| Spy49_0401  | -    | 401585 | 402160 | 165 | 0.945   | U  | 1       | E  | 0.996   | E  |
| Spy49_0402  | -    | 402319 | 402816 | 135 | 0.99725 | E  | 1       | E  | 0.998   | E  |
| Spy49_0403  | dgk  | 402797 | 403204 | 298 | 0.914   | U  | 1       | E  | 1       | E  |
| Spy49_0404  | era  | 403324 | 404220 | 158 | 0       | NE | 0       | NE | 0       | NE |
| Spy49_0405c | -    | 404241 | 404717 | 84  | 0.00025 | NE | 0       | NE | 0.0005  | NE |
| Spy49_0406  | -    | 405023 | 405277 | 60  | 0       | NE | 0       | NE | 0       | NE |
| Spy49_0407c | -    | 405910 | 406092 | 49  | -1      | S  | -1      | S  | -1      | S  |
| Spy49_0408c | -    | 406430 | 406579 | 140 | 0       | NE | 0       | NE | 0       | NE |
| Spy49_0409  | -    | 406576 | 406998 | 75  | 0       | NE | 0       | NE | 0       | NE |
| Spy49_0410  | -    | 407316 | 407543 | 86  | 0       | NE | 0       | NE | 0       | NE |
| Spy49_0411  | -    | 408295 | 408555 | 123 | 0       | NE | 0       | NE | 0       | NE |
| Spy49_0412  | -    | 408771 | 409142 | 355 | 0.00025 | NE | 0       | NE | 0.0795  | U  |
| Spy49_0413  | -    | 409427 | 410494 | 132 | 0       | NE | 0       | NE | 0.00025 | NE |
| Spy49_0414c | -    | 410587 | 410985 | 89  | 0       | NE | 0       | NE | 0       | NE |
| Spy49_0415  | -    | 411333 | 411602 | 288 | 0.00025 | NE | 0       | NE | 0.00025 | NE |
| Spy49_0416  | mutR | 412673 | 413539 | 275 | 0       | NE | 0       | NE | 0       | NE |
| Spy49_0417  | fpg  | 413711 | 414538 | 203 | 0.9985  | E  | 0.99675 | E  | 0.99975 | E  |
| Spy49_0418  | coaE | 414517 | 415128 | 500 | 0.5455  | U  | 0       | NE | 0       | NE |
| Spy49_0419  | -    | 415318 | 416820 | 397 | 0       | NE | 0       | NE | 0.00025 | NE |
| Spy49_0420  | -    | 416942 | 418135 | 48  | -1      | S  | -1      | S  | -1      | S  |
| Spy49_0421  | rpmG | 418132 | 418278 | 78  | 0.995   | E  | 1       | E  | 0.989   | U  |
| Spy49_0422  | secG | 418324 | 418560 | 777 | 0.00025 | NE | 0       | NE | 0.1865  | U  |
| Spy49_0423  | vacB | 418654 | 420987 | 155 | 0.00025 | NE | 0.00025 | NE | 0.98825 | U  |
| Spy49_0424  | smpB | 420990 | 421457 | 236 | 0       | NE | 0       | NE | 0.00025 | NE |
| Spy49_0425c | -    | 421472 | 422182 | 215 | 0       | NE | 0       | NE | 0       | NE |
| Spy49_0426c | pcp  | 422300 | 422947 | 308 | 0.00025 | NE | 0       | NE | 0       | NE |
| Spy49_0427c | -    | 422998 | 423924 | 227 | 0.00025 | NE | 0       | NE | 0.00025 | NE |
| Spy49_0428c | -    | 423924 | 424607 | 308 | 0       | NE | 0       | NE | 0.00025 | NE |
| Spy49_0429c | -    | 424818 | 425744 | 125 | 0.00025 | NE | 0       | NE | 0       | NE |
| Spy49_0430c | gloA | 425889 | 426266 | 221 | 0       | NE | 0       | NE | 0       | NE |
| Spy49_0431c | -    | 426277 | 426942 | 361 | 0       | NE | 0       | NE | 0       | NE |
| Spy49_0432  | pepQ | 426991 | 428076 | 333 | 0.959   | U  | 0.999   | E  | 1       | E  |
| Spy49_0433  | ccpA | 428250 | 429251 | 332 | 0.981   | U  | 1       | E  | 1       | E  |
| Spy49_0434  | -    | 429382 | 430380 | 444 | 0.99675 | E  | 1       | E  | 0.99475 | E  |

|             |      |        |        |      |         |    |       |    |         |    |
|-------------|------|--------|--------|------|---------|----|-------|----|---------|----|
| Spy49_0435  | -    | 430382 | 431716 | 647  | 1       | E  | 1     | E  | 1       | E  |
| Spy49_0436  | thrS | 432138 | 434081 | 330  | 0       | NE | 0     | NE | 0.001   | NE |
| Spy49_0437  | tagH | 434222 | 435214 | 272  | 0.00025 | NE | 0     | NE | 0.00025 | NE |
| Spy49_0438  | -    | 435216 | 436034 | 261  | 0       | NE | 0     | NE | 0.00025 | NE |
| Spy49_0439  | -    | 436036 | 436821 | 49   | -1      | S  | -1    | S  | -1      | S  |
| Spy49_0440  | -    | 437022 | 437171 | 382  | 0       | NE | 0     | NE | 0       | NE |
| Spy49_0441  | -    | 437566 | 438714 | 415  | 0.00025 | NE | 0     | NE | 0.00025 | NE |
| Spy49_0442  | -    | 438671 | 439918 | 344  | 0       | NE | 0     | NE | 0       | NE |
| Spy49_0444  | -    | 439974 | 441008 | 236  | 1       | E  | 1     | E  | 0.9995  | E  |
| Spy49_0445  | vicR | 441170 | 441880 | 450  | 0.00025 | NE | 0     | NE | 0       | NE |
| Spy49_0446  | vicK | 441873 | 443225 | 269  | 0.00025 | NE | 0     | NE | 0       | NE |
| Spy49_0447  | vicX | 443229 | 444038 | 230  | 0.99775 | E  | 0.444 | U  | 0.99725 | E  |
| Spy49_0448  | rnc  | 444483 | 445175 | 1179 | 0.00025 | NE | 0     | NE | 0.15575 | U  |
| Spy49_0449c | smc  | 445176 | 448715 | 283  | 0.00025 | NE | 0     | NE | 0.00025 | NE |
| Spy49_0450  | -    | 448963 | 449814 | 290  | 0       | NE | 0     | NE | 0.00025 | NE |
| Spy49_0451  | aroE | 450088 | 450960 | 278  | 0.00025 | NE | 0     | NE | 0.01975 | NE |
| Spy49_0453  | -    | 450957 | 451793 | 244  | 0.00025 | NE | 0     | NE | 0.9755  | U  |
| Spy49_0454  | -    | 451795 | 452529 | 328  | 0       | NE | 0     | NE | 0.00025 | NE |
| Spy49_0455  | -    | 452522 | 453508 | 399  | 0       | NE | 0     | NE | 0.00025 | NE |
| Spy49_0456  | -    | 453518 | 454717 | 300  | 0       | NE | 0     | NE | 0.00025 | NE |
| Spy49_0457  | -    | 454701 | 455603 | 329  | 0.00025 | NE | 0     | NE | 0.00025 | NE |
| Spy49_0458  | -    | 455724 | 456713 | 88   | 0       | NE | 0     | NE | 0.00025 | NE |
| Spy49_0459  | -    | 457116 | 457382 | 385  | 0.00025 | NE | 0     | NE | 0.00025 | NE |
| Spy49_0460  | -    | 457406 | 458563 | 389  | 0.00025 | NE | 0     | NE | 0       | NE |
| Spy49_0461c | -    | 458648 | 459817 | 69   | 0       | NE | 0     | NE | 0       | NE |
| Spy49_0462c | -    | 459958 | 460167 | 552  | 0       | NE | 0     | NE | 0       | NE |
| Spy49_0463c | -    | 460157 | 461815 | 74   | 0       | NE | 0     | NE | 0       | NE |
| Spy49_0464c | -    | 461806 | 462030 | 296  | 0.00025 | NE | 0     | NE | 0       | NE |
| Spy49_0465  | -    | 462034 | 462924 | 52   | -1      | S  | -1    | S  | -1      | S  |
| Spy49_0466  | -    | 462958 | 463116 | 100  | 0.0145  | NE | 0     | NE | 0.033   | NE |
| Spy49_0467  | -    | 463171 | 463473 | 58   | 0.00025 | NE | 0     | NE | 0       | NE |
| Spy49_0468  | -    | 463602 | 463778 | 150  | 0       | NE | 0     | NE | 0       | NE |
| Spy49_0469  | -    | 464174 | 464626 | 102  | 0       | NE | 0     | NE | 0.00025 | NE |
| Spy49_0470c | -    | 464692 | 465000 | 62   | 0.0005  | NE | 0     | NE | 0       | NE |
| Spy49_0471  | -    | 465238 | 465426 | 107  | 0       | NE | 0     | NE | 0       | NE |
| Spy49_0473  | -    | 465417 | 465740 | 223  | 0.00025 | NE | 0     | NE | 0       | NE |
| Spy49_0474  | -    | 465785 | 466456 | 415  | 0       | NE | 0     | NE | 0       | NE |
| Spy49_0475  | -    | 466617 | 467864 | 238  | 0       | NE | 0     | NE | 0       | NE |
| Spy49_0476  | -    | 468092 | 468808 | 319  | 0.00025 | NE | 0     | NE | 0       | NE |
| Spy49_0477c | -    | 468984 | 469943 | 267  | 0       | NE | 0     | NE | 0.00025 | NE |
| Spy49_0478c | -    | 470313 | 471116 | 91   | 0       | NE | 0     | NE | 0       | NE |
| Spy49_0479  | -    | 471164 | 471439 | 72   | 0.0305  | NE | 0     | NE | 0.00025 | NE |
| Spy49_0480  | -    | 471459 | 471677 | 265  | 0       | NE | 0     | NE | 0       | NE |
| Spy49_0481  | -    | 471744 | 472541 | 274  | 0       | NE | 0     | NE | 0.00025 | NE |
| Spy49_0482  | -    | 472545 | 473369 | 516  | 1       | E  | 1     | E  | 1       | E  |
| Spy49_0483c | ftsY | 473369 | 474919 | 455  | 0       | NE | 0     | NE | 0       | NE |
| Spy49_0484  | -    | 474973 | 476340 | 280  | 0.00025 | NE | 0     | NE | 0.00025 | NE |
| Spy49_0485  | bglG | 476668 | 477510 | 620  | 0       | NE | 0     | NE | 0.00025 | NE |
| Spy49_0487  | -    | 477512 | 479374 | 474  | 0       | NE | 0     | NE | 0       | NE |
| Spy49_0488c | bglA | 479393 | 480817 | 271  | 0       | NE | 0     | NE | 0       | NE |
| Spy49_0489c | -    | 480916 | 481731 | 300  | 0       | NE | 0     | NE | 0       | NE |
| Spy49_0490  | -    | 481731 | 482633 | 710  | 0.00025 | NE | 0     | NE | 0.00025 | NE |
| Spy49_0491  | -    | 483170 | 485302 | 160  | 0       | NE | 0     | NE | 0       | NE |
| Spy49_0493  | -    | 485244 | 485726 | 90   | 0       | NE | 0     | NE | 0       | NE |
| Spy49_0494  | -    | 485790 | 486062 | 330  | 0.00025 | NE | 1     | E  | 1       | E  |
| Spy49_0495  | ptsK | 486367 | 487359 | 259  | 0.00025 | NE | 0     | NE | 0.00025 | NE |
| Spy49_0496  | lgt  | 487356 | 488135 | 135  | 0.00025 | NE | 0     | NE | 0       | NE |
| Spy49_0497  | -    | 488157 | 488564 | 142  | 0       | NE | 0     | NE | 0       | NE |
| Spy49_0498  | -    | 488557 | 488985 | 89   | 0       | NE | 0     | NE | 0       | NE |
| Spy49_0499  | -    | 489044 | 489313 | 308  | 0.00025 | NE | 0     | NE | 0       | NE |
| Spy49_0500  | -    | 489631 | 490557 | 428  | 0       | NE | 0     | NE | 0       | NE |
| Spy49_0501  | -    | 490659 | 491945 | 75   | 0       | NE | 0     | NE | 0       | NE |
| Spy49_0502c | -    | 492146 | 492373 | 46   | -1      | S  | -1    | S  | -1      | S  |
| Spy49_0503c | -    | 492470 | 492610 | 497  | 1       | E  | 1     | E  | 1       | E  |
| Spy49_0504  | lysS | 492746 | 494239 | 300  | 0.00025 | NE | 0     | NE | 0.00025 | NE |
| Spy49_0505c | -    | 494413 | 495315 | 207  | 0       | NE | 0     | NE | 0       | NE |
| Spy49_0506c | -    | 495423 | 496046 | 159  | 0       | NE | 0     | NE | 0       | NE |
| Spy49_0507c | -    | 496387 | 496866 | 187  | 0       | NE | 0     | NE | 0       | NE |

|             |        |        |        |      |         |    |         |    |         |    |
|-------------|--------|--------|--------|------|---------|----|---------|----|---------|----|
| Spy49_0508c | -      | 496957 | 497520 | 282  | 0       | NE | 0       | NE | 0       | NE |
| Spy49_0509  | -      | 497789 | 498637 | 167  | 0       | NE | 0       | NE | 0.00025 | NE |
| Spy49_0510  | -      | 498962 | 499465 | 128  | 0       | NE | 0       | NE | 0       | NE |
| Spy49_0511c | -      | 499449 | 499835 | 159  | 0.00025 | NE | 0       | NE | 0.00025 | NE |
| Spy49_0512c | -      | 499881 | 500360 | 599  | 0       | NE | 0       | NE | 0       | NE |
| Spy49_0513  | pepF   | 500353 | 502152 | 932  | 0       | NE | 0       | NE | 0       | NE |
| Spy49_0514  | ppc    | 502311 | 505109 | 302  | 1       | E  | 1       | E  | 1       | E  |
| Spy49_0515  | ftsW   | 505279 | 506187 | 398  | 1       | E  | 1       | E  | 0.9905  | U  |
| Spy49_0516  | tufA   | 506912 | 508108 | 252  | 0.95575 | U  | 1       | E  | 1       | E  |
| Spy49_0517c | tpiA   | 508349 | 509107 | 411  | 1       | E  | 1       | E  | 1       | E  |
| Spy49_0518c | murN   | 509207 | 510442 | 408  | 1       | E  | 1       | E  | 1       | E  |
| Spy49_0519c | murM.1 | 510429 | 511655 | 269  | 0.00025 | NE | 0       | NE | 0.00025 | NE |
| Spy49_0520c | -      | 511655 | 512464 | 433  | 0       | NE | 0       | NE | 0       | NE |
| Spy49_0521  | -      | 512920 | 514221 | 128  | 0       | NE | 0       | NE | 0       | NE |
| Spy49_0522  | -      | 514303 | 514689 | 893  | 0.9995  | E  | 1       | E  | 1       | E  |
| Spy49_0523c | pacL   | 514920 | 517601 | 331  | 0.00025 | NE | 0       | NE | 0       | NE |
| Spy49_0524c | regR   | 517687 | 518682 | 635  | 0.00025 | NE | 0       | NE | 0       | NE |
| Spy49_0525c | -      | 518746 | 520653 | 273  | 0       | NE | 0       | NE | 0.44825 | U  |
| Spy49_0526c | agaD   | 520740 | 521561 | 260  | 0.00025 | NE | 0       | NE | 0.00025 | NE |
| Spy49_0527c | agaW   | 521548 | 522330 | 162  | 0.00025 | NE | 0       | NE | 0       | NE |
| Spy49_0528c | agaV   | 522349 | 522837 | 399  | 0       | NE | 0       | NE | 0.00025 | NE |
| Spy49_0529c | ugl    | 522873 | 524072 | 145  | 0       | NE | 0       | NE | 0       | NE |
| Spy49_0530  | agaF   | 524072 | 524509 | 264  | 0       | NE | 0       | NE | 0       | NE |
| Spy49_0531  | -      | 524844 | 525638 | 213  | 0       | NE | 0       | NE | 0       | NE |
| Spy49_0532  | -      | 525663 | 526304 | 333  | 0       | NE | 0       | NE | 0       | NE |
| Spy49_0533  | kdgK   | 526333 | 527334 | 211  | 0       | NE | 0       | NE | 0       | NE |
| Spy49_0534  | kdgA   | 527339 | 527974 | 216  | 0.014   | NE | 0       | NE | 0.00025 | NE |
| Spy49_0535  | -      | 528272 | 528922 | 374  | 0       | NE | 0       | NE | 0       | NE |
| Spy49_0536  | -      | 529618 | 530742 | 326  | 1       | E  | 1       | E  | 0.99175 | E  |
| Spy49_0537  | prfB   | 530928 | 531908 | 230  | 0.00075 | NE | 0.00025 | NE | 0.27175 | U  |
| Spy49_0538  | ftsE   | 531927 | 532619 | 309  | 0.88575 | U  | 1       | E  | 1       | E  |
| Spy49_0539c | ftsX   | 532612 | 533541 | 192  | 0.00025 | NE | 0       | NE | 0       | NE |
| Spy49_0540  | -      | 533851 | 534429 | 254  | 0.00025 | NE | 0       | NE | 0       | NE |
| Spy49_0541  | -      | 534718 | 535482 | 833  | 0.00025 | NE | 0       | NE | 0       | NE |
| Spy49_0543  | dinG   | 535590 | 538091 | 397  | 0       | NE | 0       | NE | 0       | NE |
| Spy49_0544  | aspC   | 538426 | 539619 | 448  | 1       | E  | 1       | E  | 1       | E  |
| Spy49_0545  | asnC   | 539640 | 540986 | 296  | 1       | E  | 1       | E  | 1       | E  |
| Spy49_0546  | -      | 541401 | 542291 | 325  | 0       | NE | 0       | NE | 0       | NE |
| Spy49_0547  | -      | 542288 | 543265 | 303  | 0.001   | NE | 0       | NE | 0.0035  | NE |
| Spy49_0548  | -      | 543262 | 544173 | 465  | 0       | NE | 0       | NE | 0.00025 | NE |
| Spy49_0549  | pepD   | 544306 | 545703 | 515  | 0       | NE | 0       | NE | 0.0005  | NE |
| Spy49_0550  | adcA   | 545855 | 547402 | 240  | 0       | NE | 0       | NE | 0       | NE |
| Spy49_0551  | -      | 547552 | 548274 | 399  | 0.00025 | NE | 0       | NE | 0       | NE |
| Spy49_0552c | agaS   | 548294 | 549493 | 86   | 0.95875 | U  | 0       | NE | 0       | NE |
| Spy49_0554c | rpmE2  | 549590 | 549850 | 313  | 0.00025 | NE | 0       | NE | 0.00025 | NE |
| Spy49_0555  | -      | 549965 | 550906 | 149  | 0.00025 | NE | 0       | NE | 0       | NE |
| Spy49_0556  | flaV   | 551300 | 551749 | 94   | 0.00025 | NE | 0       | NE | 0.0495  | U  |
| Spy49_0557  | -      | 551925 | 552209 | 420  | 0.032   | NE | 0.06425 | NE | 0.99925 | E  |
| Spy49_0558  | -      | 552202 | 553464 | 115  | 0.716   | U  | 1       | E  | 0.0895  | U  |
| Spy49_0559  | rplS   | 553579 | 553926 | 189  | 0       | NE | 0       | NE | 0       | NE |
| Spy49_0560  | -      | 554947 | 555516 | 650  | 1       | E  | 1       | E  | 1       | E  |
| Spy49_0561  | gyrB   | 555517 | 557469 | 574  | 1       | E  | 1       | E  | 1       | E  |
| Spy49_0562c | e zrA  | 557837 | 559561 | 152  | 0       | NE | 0       | NE | 0       | NE |
| Spy49_0563  | -      | 559693 | 560151 | 435  | 0.99875 | E  | 1       | E  | 1       | E  |
| Spy49_0564c | eno    | 560384 | 561691 | 191  | 0.00025 | NE | 0       | NE | 0       | NE |
| Spy49_0565c | -      | 562280 | 562855 | 53   | -1      | S  | -1      | S  | -1      | S  |
| Spy49_0566c | -      | 562941 | 563102 | 513  | 0       | NE | 0       | NE | 0       | NE |
| Spy49_0567  | -      | 563464 | 565005 | 1130 | 0       | NE | 0       | NE | 0.2585  | U  |
| Spy49_0568  | -      | 565552 | 568944 | 53   | 0.0315  | NE | 0       | NE | 0       | NE |
| Spy49_0569  | sagA   | 569809 | 569970 | 316  | 0.00025 | NE | 0       | NE | 0       | NE |
| Spy49_0570  | sagB   | 570192 | 571142 | 352  | 0.00025 | NE | 0       | NE | 0       | NE |
| Spy49_0572  | sagC   | 571139 | 572197 | 452  | 0       | NE | 0       | NE | 0.00025 | NE |
| Spy49_0573  | sagD   | 572217 | 573575 | 223  | 0       | NE | 0       | NE | 0       | NE |
| Spy49_0574  | sagE   | 573550 | 574221 | 227  | 0.00025 | NE | 0       | NE | 0.00025 | NE |
| Spy49_0575  | sagF   | 574218 | 574901 | 307  | 0.9135  | U  | 0       | NE | 0.99975 | E  |
| Spy49_0576  | sagG   | 574924 | 575847 | 375  | 0       | NE | 0.99625 | E  | 0.73725 | U  |
| Spy49_0577  | sagH   | 575856 | 576983 | 372  | 0.00025 | NE | 0.00025 | NE | 0.99375 | E  |
| Spy49_0578  | sagI   | 576980 | 578098 | 910  | 0.0005  | NE | 0       | NE | 0       | NE |



|             |        |         |        |      |         |    |         |    |         |    |
|-------------|--------|---------|--------|------|---------|----|---------|----|---------|----|
| Spy49_0579  | -      | 578669  | 581401 | 166  | 0       | NE | 0       | NE | 0       | NE |
| Spy49_0580  | -      | 581679  | 582179 | 652  | 0.99175 | U  | 1       | E  | 1       | E  |
| Spy49_0581  | ligA   | 582373  | 584331 | 340  | 1       | E  | 1       | E  | 0.99975 | E  |
| Spy49_0582  | -      | 584345  | 585367 | 65   | 0.931   | U  | 1       | E  | 0.93375 | U  |
| Spy49_0583  | -      | 585762  | 585959 | 238  | 1       | E  | 1       | E  | 1       | E  |
| Spy49_0584  | -      | 585994  | 586710 | 164  | 0.99825 | E  | 0.969   | U  | 0.994   | E  |
| Spy49_0585  | -      | 586728  | 587222 | 178  | 1       | E  | 1       | E  | 1       | E  |
| Spy49_0586  | -      | 587222  | 587758 | 502  | 1       | E  | 1       | E  | 1       | E  |
| Spy49_0587  | -      | 587774  | 589282 | 291  | 1       | E  | 1       | E  | 1       | E  |
| Spy49_0588  | -      | 589298  | 590173 | 468  | 1       | E  | 1       | E  | 1       | E  |
| Spy49_0589  | -      | 590335  | 591741 | 138  | 0.97825 | U  | 0       | NE | 0.9285  | U  |
| Spy49_0590  | atpC   | 591754  | 592170 | 85   | 0.00025 | NE | 0       | NE | 0       | NE |
| Spy49_0591  | -      | 592436  | 592693 | 423  | 0.00025 | NE | 0       | NE | 0.00025 | NE |
| Spy49_0592  | murA   | 592758  | 594029 | 62   | 0.001   | NE | 0       | NE | 0       | NE |
|             | -      | 594033  | 594221 |      | 0       | NE | 0       | NE | 0       | NE |
|             | pheS   | 595077  | 596120 |      | 0       | NE | 0       | NE | 0.00025 | NE |
| Spy49_0596  | pheT   | 596330  | 598735 | 347  | 1       | E  | 1       | E  | 1       | E  |
| Spy49_0597  | -      | 598845  | 599222 | 801  | 1       | E  | 1       | E  | 1       | E  |
| Spy49_0598  | -      | 599215  | 599601 | 125  | 0       | NE | 0       | NE | 0       | NE |
| Spy49_0599  | -      | 599674  | 600750 | 128  | 0       | NE | 0       | NE | 0.00025 | NE |
| Spy49_0600  | -      | 600760  | 601428 | 358  | 0.00025 | NE | 0       | NE | 0       | NE |
| Spy49_0601  | -      | 601532  | 602449 | 222  | 0       | NE | 0       | NE | 0.0005  | NE |
| Spy49_0602c | rexB   | 602600  | 605815 | 305  | 0       | NE | 0       | NE | 0       | NE |
| Spy49_0603  | rexA   | 605776  | 609444 | 1071 | 0.006   | NE | 0       | NE | 1       | E  |
| Spy49_0604  | -      | 609584  | 610204 | 1222 | 0.93275 | U  | 1       | E  | 1       | E  |
| Spy49_0605  | rpsU   | 610543  | 610719 | 206  | 0       | NE | 0       | NE | 0       | NE |
| Spy49_0606  | mscL   | 6110847 | 611209 | 58   | 0.955   | U  | 0.9985  | E  | 0.26675 | U  |
| Spy49_0607c | dnaG   | 611339  | 613153 | 120  | 0       | NE | 0       | NE | 0       | NE |
| Spy49_0608  | rpoD   | 613162  | 614271 | 604  | 0.999   | E  | 1       | E  | 1       | E  |
| Spy49_0609  | -      | 614507  | 614845 | 369  | 1       | E  | 1       | E  | 1       | E  |
| Spy49_0610  | rmlD   | 614983  | 615837 | 112  | 0.00025 | NE | 0       | NE | 0       | NE |
| Spy49_0611  | rgpAc  | 615956  | 617110 | 284  | 0.99925 | E  | 1       | E  | 1       | E  |
| Spy49_0612  | rgpBc  | 617100  | 618032 | 384  | 0.2065  | U  | 1       | E  | 1       | E  |
| Spy49_0613  | rgpCc  | 618035  | 618838 | 310  | 0.0595  | U  | 1       | E  | 1       | E  |
| Spy49_0614  | rgpDc  | 618838  | 620058 | 267  | 1       | E  | 1       | E  | 1       | E  |
| Spy49_0615  | rgpEc  | 620069  | 621076 | 406  | 1       | E  | 1       | E  | 1       | E  |
| Spy49_0617  | rgpFc  | 621073  | 622818 | 335  | 0.99975 | E  | 1       | E  | 1       | E  |
| Spy49_0618  | -      | 622815  | 625289 | 581  | 0.99875 | E  | 1       | E  | 1       | E  |
| Spy49_0619  | -      | 625468  | 626163 | 824  | 0.00025 | NE | 0       | NE | 0       | NE |
| Spy49_0620  | -      | 626165  | 626506 | 231  | 0       | NE | 0       | NE | 0       | NE |
| Spy49_0621  | -      | 626499  | 627785 | 113  | 0.00025 | NE | 0       | NE | 0       | NE |
| Spy49_0622  | -      | 627766  | 629262 | 428  | 0.00025 | NE | 0.99575 | E  | 1       | E  |
| Spy49_0623  | pepT   | 629356  | 630579 | 498  | 0.00375 | NE | 1       | E  | 1       | E  |
| Spy49_0624  | -      | 630620  | 631108 | 407  | 0.00025 | NE | 0       | NE | 0.00025 | NE |
| Spy49_0625  | -      | 631095  | 631292 | 162  | 0       | NE | 0       | NE | 0       | NE |
| Spy49_0626c | -      | 631341  | 631817 | 65   | 0       | NE | 0       | NE | 0       | NE |
| Spy49_0627  | cmk    | 631832  | 632512 | 158  | 0       | NE | 0       | NE | 0.00025 | NE |
| Spy49_0628  | infC   | 632674  | 633204 | 226  | 0.00025 | NE | 0       | NE | 0.16625 | U  |
| Spy49_0629  | rpml   | 633246  | 633443 | 176  | 0.9975  | E  | 1       | E  | 0.99225 | E  |
| Spy49_0630  | rplT   | 633502  | 633861 | 65   | 0       | NE | 0       | NE | 0       | NE |
| Spy49_0631  | -      | 634152  | 636362 | 119  | 0.02    | NE | 0.9965  | E  | 0.00075 | NE |
| Spy49_0632c | -      | 636470  | 637633 | 736  | 1       | E  | 1       | E  | 1       | E  |
| Spy49_0633  | aroD   | 637630  | 638316 | 387  | 0.00025 | NE | 0       | NE | 0.00025 | NE |
| Spy49_0634  | aroF   | 638410  | 639576 | 228  | 0.00025 | NE | 0       | NE | 0       | NE |
| Spy49_0635  | -      | 639637  | 639978 | 388  | 0       | NE | 0       | NE | 0       | NE |
| Spy49_0636  | gor    | 640200  | 641552 | 113  | 0       | NE | 0       | NE | 0       | NE |
| Spy49_0637  | folC.2 | 641640  | 642908 | 450  | 0       | NE | 0       | NE | 0.00025 | NE |
| Spy49_0638c | -      | 642938  | 643378 | 422  | 0       | NE | 0       | NE | 0       | NE |
| Spy49_0639c | nifS   | 643613  | 644755 | 146  | 0       | NE | 0       | NE | 0       | NE |
| Spy49_0640  | thil   | 644767  | 645981 | 380  | 0       | NE | 0       | NE | 0.00025 | NE |
| Spy49_0641  | -      | 646019  | 647287 | 404  | 0       | NE | 0       | NE | 0       | NE |
| Spy49_0642  | rplU   | 647526  | 647840 | 422  | 0.00025 | NE | 0       | NE | 0.0005  | NE |
| Spy49_0643  | -      | 647852  | 648178 | 104  | 0.9925  | U  | 0.00075 | NE | 0.9885  | U  |
| Spy49_0644  | rpmA   | 648206  | 648499 | 108  | 0.00275 | NE | 1       | E  | 0.8775  | U  |
| Spy49_0645  | -      | 648847  | 649761 | 97   | 0.057   | U  | 0       | NE | 0.923   | U  |
| Spy49_0646  | lsp    | 649758  | 650216 | 304  | 0.00025 | NE | 0       | NE | 0.00025 | NE |
| Spy49_0647  | -      | 650206  | 651096 | 152  | 0       | NE | 0       | NE | 0.00025 | NE |
| Spy49_0648  | pyrR   | 651492  | 652013 | 296  | 0       | NE | 0       | NE | 0       | NE |

|             |       |        |        |      |         |    |         |    |         |    |
|-------------|-------|--------|--------|------|---------|----|---------|----|---------|----|
| Spy49_0650  | pyrP  | 652029 | 653288 | 173  | 0       | NE | 0       | NE | 0       | NE |
| Spy49_0651  | pyrB  | 653349 | 654284 | 419  | 0       | NE | 0       | NE | 0       | NE |
| Spy49_0652  | carA  | 654328 | 655410 | 311  | 0       | NE | 0       | NE | 0       | NE |
| Spy49_0653  | carB  | 655656 | 658832 | 360  | 0       | NE | 0       | NE | 0.52125 | U  |
| Spy49_0654  | -     | 659041 | 660312 | 1058 | 0       | NE | 0       | NE | 0.00025 | NE |
| Spy49_0655  | -     | 660312 | 661022 | 423  | 0       | NE | 0       | NE | 0.00025 | NE |
| Spy49_0656  | -     | 661034 | 662254 | 236  | 0       | NE | 0       | NE | 0.00025 | NE |
| Spy49_0657  | -     | 662508 | 664241 | 406  | 0.00025 | NE | 0       | NE | 0.00025 | NE |
| Spy49_0658  | rpsP  | 664368 | 664640 | 577  | 0.39425 | U  | 0       | NE | 0.997   | E  |
| Spy49_0659  | -     | 664650 | 664889 | 90   | 0.999   | E  | 1       | E  | 0.99825 | E  |
| Spy49_0660  | -     | 665821 | 668847 | 79   | 0.9955  | E  | 0       | NE | 0.9675  | U  |
| Spy49_0661  | -     | 668867 | 669268 | 1008 | 0.00025 | NE | 0       | NE | 0.00025 | NE |
| Spy49_0662  | czcD  | 669448 | 670323 | 133  | 0.00025 | NE | 0       | NE | 0.00025 | NE |
| Spy49_0663c | -     | 670459 | 670980 | 291  | 0       | NE | 0       | NE | 0       | NE |
| Spy49_0664  | rimM  | 671195 | 671713 | 173  | 0       | NE | 0       | NE | 0.00025 | NE |
| Spy49_0665  | trmD  | 671700 | 672434 | 172  | 0.2     | U  | 0.00025 | NE | 0.00025 | NE |
| Spy49_0667  | -     | 672434 | 673426 | 244  | 0.998   | E  | 1       | E  | 1       | E  |
| Spy49_0668  | -     | 673603 | 674661 | 330  | 0.00025 | NE | 0       | NE | 0       | NE |
| Spy49_0669  | apbA  | 674674 | 675597 | 352  | 0.00025 | NE | 0       | NE | 0       | NE |
| Spy49_0671  | fruR  | 675853 | 676566 | 307  | 0       | NE | 0       | NE | 0       | NE |
| Spy49_0672  | fruK  | 676563 | 677474 | 237  | 0       | NE | 0       | NE | 0       | NE |
| Spy49_0673  | fruA  | 677471 | 679417 | 303  | 0       | NE | 0       | NE | 0       | NE |
| Spy49_0674  | -     | 679516 | 680109 | 648  | 0       | NE | 0       | NE | 0.00025 | NE |
| Spy49_0675  | -     | 680261 | 680968 | 197  | 0.00025 | NE | 0       | NE | 0.00025 | NE |
| Spy49_0676  | -     | 681025 | 681243 | 235  | 0       | NE | 0       | NE | 0       | NE |
| Spy49_0677c | mac   | 681925 | 682944 | 72   | 0       | NE | 0       | NE | 0.00025 | NE |
| -           | -     | 683850 | 684230 | -    | 0       | NE | 0       | NE | 0.00075 | NE |
| Spy49_0679  | -     | 684230 | 685078 | 339  | 0       | NE | 0       | NE | 0.00025 | NE |
| Spy49_0680  | papS  | 685252 | 686412 | 126  | 0       | NE | 0       | NE | 0.0005  | NE |
| Spy49_0681  | -     | 686409 | 688286 | 282  | 0.00025 | NE | 0       | NE | 0       | NE |
| Spy49_0682  | -     | 689180 | 689590 | 386  | 1       | E  | 1       | E  | 1       | E  |
| Spy49_0683  | -     | 689672 | 691684 | 625  | 0       | NE | 0       | NE | 0.00025 | NE |
| Spy49_0684  | -     | 691904 | 692554 | 136  | 0       | NE | 0       | NE | 0       | NE |
| Spy49_0686c | -     | 692557 | 693225 | 670  | 0       | NE | 0       | NE | 0.0005  | NE |
| Spy49_0687  | -     | 693234 | 694466 | 216  | 0.00025 | NE | 0       | NE | 0.00025 | NE |
| Spy49_0688  | mvaK1 | 694760 | 695638 | 222  | 0.00025 | NE | 0       | NE | 0.00025 | NE |
| Spy49_0689  | mvaD  | 695620 | 696564 | 410  | 0       | NE | 0       | NE | 0       | NE |
| Spy49_0690  | mvaK2 | 696557 | 697570 | 292  | 0.0005  | NE | 1       | E  | 1       | E  |
| Spy49_0691  | -     | 697557 | 698546 | 314  | 0.977   | U  | 1       | E  | 1       | E  |
| Spy49_0692  | mvaS1 | 698776 | 700053 | 337  | 1       | E  | 1       | E  | 1       | E  |
| Spy49_0693  | mvaS2 | 700040 | 701215 | 329  | 0.6545  | U  | 1       | E  | 1       | E  |
| Spy49_0694c | thyA  | 701424 | 702263 | 425  | 0.9995  | E  | 1       | E  | 1       | E  |
| Spy49_0695c | dyr   | 702343 | 702840 | 391  | 1       | E  | 1       | E  | 1       | E  |
| Spy49_0696  | -     | 702860 | 703060 | 279  | 0.00025 | NE | 0       | NE | 0.99975 | E  |
| Spy49_0697  | clpX  | 703161 | 704390 | 165  | 0.00025 | NE | 1       | E  | 1       | E  |
| Spy49_0698  | engB  | 704400 | 704999 | 66   | 0       | NE | 0       | NE | 0.00525 | NE |
| Spy49_0700  | -     | 705147 | 705890 | 409  | 0.306   | U  | 0       | NE | 0.80075 | U  |
| Spy49_0701  | clpL  | 705948 | 708047 | 199  | 0.0005  | NE | 1       | E  | 0.9985  | E  |
| Spy49_0702  | rpiA  | 708425 | 709108 | 247  | 0       | NE | 0       | NE | 0       | NE |
| Spy49_0703c | deoB  | 709185 | 710396 | 699  | 0.00025 | NE | 0       | NE | 0.00025 | NE |
| Spy49_0704  | arsC  | 710415 | 710855 | 227  | 0.00025 | NE | 0       | NE | 0.98625 | U  |
| Spy49_0705  | punA  | 710839 | 711648 | 403  | 0       | NE | 0       | NE | 0       | NE |
| Spy49_0706  | deoD  | 712176 | 712946 | 146  | 0       | NE | 0       | NE | 0       | NE |
| Spy49_0707  | -     | 712939 | 713727 | 269  | 0       | NE | 0       | NE | 0       | NE |
| Spy49_0708  | cpsY  | 713807 | 714712 | 256  | 0       | NE | 0       | NE | 0       | NE |
| Spy49_0709  | -     | 714934 | 715470 | 262  | 0       | NE | 0       | NE | 0       | NE |
| Spy49_0710c | pyrF  | 715747 | 716439 | 301  | 0       | NE | 0       | NE | 0.00025 | NE |
| Spy49_0711  | pyrE  | 716497 | 717126 | 178  | 0       | NE | 0       | NE | 0       | NE |
| Spy49_0712  | amiC  | 717323 | 718777 | 230  | 0       | NE | 0       | NE | 0       | NE |
| Spy49_0713  | -     | 718895 | 719758 | 209  | 0       | NE | 0       | NE | 0.00025 | NE |
| Spy49_0714  | -     | 719787 | 720437 | 484  | 0       | NE | 0       | NE | 0.002   | NE |
| Spy49_0715  | ung   | 720570 | 721223 | 287  | 0.00025 | NE | 0       | NE | 0       | NE |
| Spy49_0716  | pyrC  | 721355 | 722623 | 216  | 0.00025 | NE | 0       | NE | 0       | NE |
| Spy49_0717  | -     | 722681 | 723322 | 217  | 0       | NE | 0       | NE | 0       | NE |
| Spy49_0718  | parE  | 723457 | 725406 | 422  | 0       | NE | 0       | NE | 0.00025 | NE |
| Spy49_0719c | parC  | 725497 | 727956 | 213  | 0.9945  | E  | 1       | E  | 1       | E  |
| Spy49_0720  | bcaT  | 728079 | 729101 | 649  | 0.99975 | E  | 1       | E  | 1       | E  |
| Spy49_0721  | -     | 729165 | 729395 | 819  | 1       | E  | 1       | E  | 1       | E  |

|             |      |        |        |      |         |    |         |    |         |    |
|-------------|------|--------|--------|------|---------|----|---------|----|---------|----|
| Spy49_0722  | rpsA | 729786 | 730991 | 340  | 0       | NE | 0       | NE | 0       | NE |
| Spy49_0723  | -    | 731493 | 731795 | 76   | 0.96775 | U  | 0       | NE | 0.058   | U  |
| Spy49_0724  | -    | 731996 | 732982 | 401  | 0.971   | U  | 1       | E  | 1       | E  |
| Spy49_0725c | -    | 733293 | 733700 | 100  | 0       | NE | 0       | NE | 0       | NE |
| Spy49_0726  | -    | 733950 | 734858 | 328  | 0.00025 | NE | 0       | NE | 0       | NE |
| Spy49_0727  | -    | 734976 | 735152 | 135  | 0       | NE | 0       | NE | 0.00025 | NE |
| Spy49_0728  | miaA | 735286 | 736185 | 302  | 0       | NE | 0       | NE | 0       | NE |
| Spy49_0729c | hflX | 736258 | 737496 | 58   | 0       | NE | 0       | NE | 0       | NE |
| Spy49_0730  | -    | 737489 | 738124 | 299  | 0.00025 | NE | 0       | NE | 0.0065  | NE |
| Spy49_0731  | -    | 738139 | 739068 | 412  | 0       | NE | 0       | NE | 0       | NE |
| Spy49_0732  | -    | 739228 | 739833 | 211  | 0       | NE | 0       | NE | 0.00025 | NE |
| Spy49_0733  | recJ | 739830 | 742040 | 309  | 1       | E  | 1       | E  | 1       | E  |
| Spy49_0734  | apt  | 742190 | 742708 | 201  | 0       | NE | 0       | NE | 0       | NE |
| Spy49_0735  | dnaD | 742789 | 743472 | 736  | 0.00025 | NE | 0       | NE | 0       | NE |
| Spy49_0736  | nth  | 743469 | 744125 | 172  | 0       | NE | 0       | NE | 0.00025 | NE |
| Spy49_0737  | -    | 744197 | 744883 | 227  | 1       | E  | 1       | E  | 1       | E  |
| Spy49_0738  | -    | 744873 | 745661 | 218  | 0       | NE | 0       | NE | 0       | NE |
| Spy49_0739  | -    | 745701 | 746825 | 228  | 0.996   | E  | 1       | E  | 0.997   | E  |
| Spy49_0740  | rmlA | 746864 | 747733 | 262  | 0       | NE | 0       | NE | 0.01375 | NE |
| Spy49_0741  | rmlC | 747733 | 748326 | 374  | 0.00025 | NE | 0       | NE | 0.00025 | NE |
| Spy49_0742  | rmlB | 748570 | 749610 | 289  | 1       | E  | 1       | E  | 1       | E  |
| Spy49_0744  | -    | 749693 | 750832 | 197  | 0.99125 | U  | 1       | E  | 0.97625 | U  |
| Spy49_0745  | -    | 750960 | 751226 | 346  | 0.99925 | E  | 1       | E  | 0.99975 | E  |
| Spy49_0746c | -    | 751238 | 751624 | 379  | 0.00025 | NE | 0       | NE | 0.00025 | NE |
| Spy49_0747c | -    | 751627 | 751977 | 88   | 0       | NE | 0       | NE | 0.00075 | NE |
| Spy49_0748c | -    | 752273 | 752443 | 128  | 0       | NE | 0       | NE | 0       | NE |
| Spy49_0749c | -    | 752469 | 753257 | 116  | 0.0185  | NE | 0.0155  | NE | 0.99875 | E  |
| Spy49_0750  | -    | 753308 | 753499 | 56   | -1      | S  | -1      | S  | -1      | S  |
| Spy49_0751c | -    | 753578 | 753889 | 262  | 0.00025 | NE | 0       | NE | 0.935   | U  |
| Spy49_0752  | -    | 753891 | 754061 | 63   | 0.00225 | NE | 0.895   | U  | 0.36025 | U  |
| Spy49_0753  | -    | 754054 | 754257 | 103  | 0.00825 | NE | 0.005   | NE | 0.42875 | U  |
| Spy49_0754  | -    | 754254 | 754640 | 56   | 0.541   | U  | 0       | NE | 0.93575 | U  |
| Spy49_0755  | -    | 754786 | 754989 | 67   | 0.02575 | NE | 0.00025 | NE | 0.90725 | U  |
| Spy49_0756  | -    | 755077 | 755376 | 128  | 0       | NE | 0       | NE | 0.00025 | NE |
| Spy49_0757  | -    | 755376 | 756533 | 67   | 0.9885  | U  | 0       | NE | 0.00325 | NE |
| Spy49_0759  | -    | 756548 | 757105 | 99   | 0.00025 | NE | 0.0005  | NE | 0.9705  | U  |
| Spy49_0760  | -    | 757148 | 759070 | 385  | 0       | NE | 0.00025 | NE | 0.00025 | NE |
| Spy49_0761  | -    | 759075 | 761459 | 185  | 0.00025 | NE | 0       | NE | 0.00025 | NE |
| Spy49_0762  | -    | 761827 | 762120 | 640  | 0       | NE | 0       | NE | 0.73875 | U  |
| Spy49_0763  | -    | 762117 | 763439 | 794  | 0       | NE | 0       | NE | 0.988   | U  |
| Spy49_0764  | -    | 763603 | 763875 | 97   | 0.402   | U  | 0.9875  | U  | 0.3905  | U  |
| Spy49_0765  | -    | 764008 | 764424 | 440  | 0       | NE | 0       | NE | 0.9845  | U  |
| Spy49_0766  | -    | 764496 | 764966 | 90   | 0       | NE | 0       | NE | 0       | NE |
| Spy49_0767  | -    | 764956 | 766233 | 138  | 0       | NE | 0       | NE | 0.00025 | NE |
| Spy49_0768  | -    | 766249 | 767781 | 156  | 0       | NE | 0       | NE | 0.00025 | NE |
| Spy49_0769  | -    | 767747 | 769189 | 425  | 0       | NE | 0       | NE | 0       | NE |
| Spy49_0770  | -    | 769410 | 769802 | 510  | 0       | NE | 0       | NE | 0.00025 | NE |
| Spy49_0771  | -    | 769845 | 770414 | 480  | 0       | NE | 0       | NE | 0       | NE |
| Spy49_0772  | -    | 770427 | 771314 | 130  | 0.00025 | NE | 0       | NE | 0.00025 | NE |
| Spy49_0773  | -    | 771326 | 771682 | 189  | 0.00025 | NE | 0       | NE | 0.127   | U  |
| Spy49_0774  | -    | 771693 | 771971 | 295  | 0       | NE | 0       | NE | 0.00025 | NE |
| Spy49_0775  | -    | 771968 | 772312 | 118  | 0       | NE | 0       | NE | 0       | NE |
| Spy49_0776  | -    | 772316 | 772675 | 92   | 0       | NE | 0       | NE | 0.00025 | NE |
| Spy49_0777  | -    | 772687 | 773286 | 114  | 0       | NE | 0       | NE | 0.00025 | NE |
| Spy49_0778  | -    | 773393 | 773794 | 119  | 0       | NE | 0       | NE | 0.9005  | U  |
| Spy49_0779  | -    | 773869 | 774102 | 199  | 0       | NE | 0       | NE | 1       | E  |
| Spy49_0780  | -    | 774117 | 778499 | 133  | 0.0195  | NE | 0       | NE | 0.19775 | U  |
| Spy49_0781  | -    | 778511 | 779353 | 77   | 0       | NE | 0       | NE | 0.00025 | NE |
| Spy49_0782  | -    | 779363 | 781342 | 1460 | 0.001   | NE | 0       | NE | 0.049   | U  |
| Spy49_0783  | -    | 781339 | 783582 | 280  | 0       | NE | 0       | NE | 0.0005  | NE |
| Spy49_0784  | -    | 783594 | 783755 | 659  | 0.00025 | NE | 0       | NE | 0.26    | U  |
| Spy49_0785  | -    | 783758 | 784369 | 747  | 0.00025 | NE | 0       | NE | 0.86775 | U  |
| Spy49_0786  | -    | 784379 | 784834 | 53   | -1      | S  | -1      | S  | -1      | S  |
| Spy49_0788  | -    | 784952 | 785704 | 203  | 0       | NE | 0       | NE | 0       | NE |
| Spy49_0789  | -    | 785870 | 786157 | 151  | 0       | NE | 0       | NE | 0       | NE |
| Spy49_0790  | speH | 786363 | 787073 | 250  | 0       | NE | 0       | NE | 0       | NE |
| Spy49_0791  | mutX | 787677 | 788153 | 95   | 0       | NE | 0       | NE | 0       | NE |
| Spy49_0792  | -    | 788211 | 789392 | 236  | 0       | NE | 0       | NE | 0       | NE |

|             |        |        |        |      |         |    |        |    |         |    |
|-------------|--------|--------|--------|------|---------|----|--------|----|---------|----|
| Spy49_0793  | -      | 789382 | 790629 | 158  | 0       | NE | 0      | NE | 0       | NE |
| Spy49_0794  | -      | 790688 | 792340 | 393  | 0.00025 | NE | 0      | NE | 0.00025 | NE |
| Spy49_0795  | -      | 792694 | 793692 | 415  | 0       | NE | 0      | NE | 0       | NE |
| Spy49_0796c | -      | 793643 | 793861 | 550  | 0       | NE | 0      | NE | 0.00025 | NE |
| Spy49_0797  | -      | 794037 | 794906 | 332  | 0.00025 | NE | 0      | NE | 0.00025 | NE |
| Spy49_0798  | -      | 794903 | 795661 | 72   | -1      | S  | -1     | S  | -1      | S  |
| Spy49_0799  | -      | 795865 | 797526 | 289  | 0       | NE | 0      | NE | 0       | NE |
| Spy49_0800  | estA   | 797659 | 798444 | 252  | 0       | NE | 0      | NE | 0       | NE |
| Spy49_0801  | -      | 798474 | 798800 | 553  | 0.99975 | E  | 1      | E  | 1       | E  |
| Spy49_0803  | -      | 798846 | 800753 | 261  | 0       | NE | 0      | NE | 0.00025 | NE |
| Spy49_0804  | acoA   | 801026 | 802006 | 108  | 0       | NE | 0      | NE | 0.00025 | NE |
| Spy49_0805  | acoB   | 802062 | 803063 | 635  | 0.0165  | NE | 0      | NE | 0       | NE |
| Spy49_0807  | acoC   | 803248 | 804657 | 326  | 0.00025 | NE | 0      | NE | 0.00025 | NE |
| Spy49_0808  | acoL   | 804984 | 806747 | 333  | 0       | NE | 0      | NE | 0       | NE |
| Spy49_0809  | hylA   | 807422 | 809839 | 469  | 0       | NE | 0      | NE | 0       | NE |
| Spy49_0810  | -      | 810072 | 811061 | 587  | 0       | NE | 0      | NE | 0.00025 | NE |
| Spy49_0811c | cobQ   | 811170 | 811961 | 805  | 0       | NE | 0      | NE | 0       | NE |
| Spy49_0812  | murC2  | 811961 | 813304 | 329  | 0       | NE | 0      | NE | 0.00025 | NE |
| Spy49_0813c | -      | 813406 | 814257 | 263  | 0.9995  | E  | 1      | E  | 1       | E  |
| Spy49_0814c | -      | 814254 | 815210 | 447  | 0.99975 | E  | 1      | E  | 1       | E  |
| Spy49_0815  | glmM   | 815264 | 816616 | 283  | 0.8475  | U  | 1      | E  | 1       | E  |
| Spy49_0816  | -      | 816739 | 817380 | 318  | 0       | NE | 0      | NE | 0.00025 | NE |
| Spy49_0817  | hemN   | 817377 | 818573 | 450  | 1       | E  | 1      | E  | 1       | E  |
| Spy49_0818  | -      | 818583 | 819335 | 213  | 0.00025 | NE | 0      | NE | 0.00025 | NE |
| Spy49_0819  | -      | 819335 | 820099 | 398  | 0       | NE | 0      | NE | 0.00025 | NE |
| Spy49_0820  | -      | 820096 | 820731 | 250  | 0.00025 | NE | 1      | E  | 1       | E  |
| Spy49_0821  | -      | 821210 | 825316 | 254  | 0       | NE | 0      | NE | 0.00025 | NE |
| Spy49_0822  | -      | 825316 | 826185 | 211  | 0.00025 | NE | 0      | NE | 0.00025 | NE |
| Spy49_0823  | -      | 826182 | 826523 | 1368 | 0.00025 | NE | 0      | NE | 0       | NE |
| Spy49_0825  | -      | 826513 | 827175 | 289  | 0.00025 | NE | 0      | NE | 0.00025 | NE |
| Spy49_0826  | -      | 827952 | 828122 | 113  | 0       | NE | 0      | NE | 0       | NE |
| Spy49_0827  | lepA-2 | 828223 | 830055 | 220  | 0       | NE | 0      | NE | 0.00025 | NE |
| Spy49_0828  | sclB   | 830338 | 831435 | 56   | 0       | NE | 0      | NE | 0       | NE |
| Spy49_0829  | csrA   | 831620 | 832057 | 610  | 0.00025 | NE | 0      | NE | 0       | NE |
| Spy49_0830  | -      | 832187 | 833206 | 365  | 0.05675 | U  | 0      | NE | 0       | NE |
| Spy49_0831  | -      | 833413 | 833838 | 145  | 0       | NE | 0      | NE | 0.00025 | NE |
| Spy49_0832  | -      | 833865 | 834356 | 339  | 0       | NE | 0      | NE | 0.00025 | NE |
| Spy49_0833  | -      | 834449 | 835183 | 141  | 0       | NE | 0      | NE | 0       | NE |
| Spy49_0834  | -      | 835180 | 836019 | 163  | 0       | NE | 0      | NE | 0.81775 | U  |
| Spy49_0835  | -      | 836144 | 837793 | 244  | 0.00025 | NE | 0      | NE | 0.00025 | NE |
| Spy49_0836  | -      | 837797 | 838585 | 279  | 0       | NE | 0      | NE | 0       | NE |
| Spy49_0837  | -      | 838579 | 839625 | 549  | 0       | NE | 0      | NE | 0.00025 | NE |
| Spy49_0839  | -      | 839741 | 841138 | 262  | 0.00025 | NE | 0      | NE | 0.00025 | NE |
| Spy49_0840  | uvrC   | 841239 | 843035 | 348  | 0       | NE | 0      | NE | 0       | NE |
| Spy49_0841  | -      | 843221 | 843823 | 465  | 0       | NE | 0      | NE | 0       | NE |
| Spy49_0842  | -      | 843948 | 845357 | 598  | 0.00025 | NE | 0      | NE | 0       | NE |
| Spy49_0843  | trmE   | 845425 | 846801 | 200  | 0       | NE | 0      | NE | 0       | NE |
| Spy49_0844  | rplJ   | 847136 | 847636 | 469  | 0       | NE | 0      | NE | 0       | NE |
| Spy49_0845c | -      | 847701 | 847799 | 458  | 0.00025 | NE | 1      | E  | 0.99575 | E  |
| Spy49_0846  | rplL   | 847874 | 848065 | 166  | 0.00025 | NE | 0      | NE | 0.00025 | NE |
| Spy49_0847  | dacA1  | 848292 | 849605 | 32   | -1      | S  | -1     | S  | -1      | S  |
| Spy49_0848  | -      | 849658 | 850620 | 63   | 0.9105  | U  | 0.0035 | NE | 0.7455  | U  |
| Spy49_0849  | folC1  | 850952 | 852229 | 437  | 0.00025 | NE | 0      | NE | 0.00025 | NE |
| Spy49_0850c | folE   | 852264 | 852848 | 320  | 0       | NE | 0      | NE | 0       | NE |
| Spy49_0851  | folP   | 852857 | 853657 | 425  | 0.00025 | NE | 1      | E  | 1       | E  |
| Spy49_0852  | folQ   | 853664 | 854023 | 194  | 0       | NE | 0      | NE | 0       | NE |
| Spy49_0853  | folK   | 854020 | 854520 | 266  | 0.00025 | NE | 0      | NE | 0.43975 | U  |
| Spy49_0854  | murB   | 854670 | 855557 | 119  | 0.00025 | NE | 0      | NE | 0.00025 | NE |
| Spy49_0855  | potA   | 855603 | 856757 | 166  | 0       | NE | 0      | NE | 0.0005  | NE |
| Spy49_0856  | potB   | 856741 | 857535 | 295  | 1       | E  | 1      | E  | 0.99975 | E  |
| Spy49_0857  | potC   | 857532 | 858308 | 384  | 0.00025 | NE | 0      | NE | 0       | NE |
| Spy49_0858  | potD   | 858301 | 859374 | 264  | 0       | NE | 0      | NE | 0       | NE |
| Spy49_0859  | -      | 859429 | 860094 | 258  | 0       | NE | 0      | NE | 0       | NE |
| Spy49_0860  | -      | 860075 | 861616 | 357  | 0       | NE | 0      | NE | 0       | NE |
| Spy49_0861c | malP   | 861777 | 863108 | 221  | 0.00025 | NE | 0      | NE | 0       | NE |
| Spy49_0862c | -      | 863140 | 864306 | 513  | 0       | NE | 0      | NE | 0.00025 | NE |
| Spy49_0863  | -      | 864388 | 865437 | 443  | 0.00025 | NE | 0      | NE | 0.00025 | NE |
| Spy49_0864  | aphA   | 865673 | 866404 | 388  | 0.00025 | NE | 0      | NE | 0       | NE |

|             |        |        |        |     |         |    |         |    |         |    |
|-------------|--------|--------|--------|-----|---------|----|---------|----|---------|----|
| Spy49_0865c | -      | 866582 | 868114 | 349 | 0       | NE | 0       | NE | 0       | NE |
| Spy49_0866  | -      | 868277 | 868891 | 243 | 0       | NE | 0       | NE | 0       | NE |
| Spy49_0867  | -      | 869071 | 870180 | 510 | 0       | NE | 0       | NE | 0.00025 | NE |
| Spy49_0868  | radC   | 870247 | 870927 | 204 | 0.00025 | NE | 0       | NE | 0.00025 | NE |
| Spy49_0869  | -      | 870929 | 871624 | 369 | 0       | NE | 0       | NE | 0       | NE |
| Spy49_0870  | -      | 871634 | 872278 | 226 | 0       | NE | 0       | NE | 0.00025 | NE |
| Spy49_0871c | -      | 872530 | 872877 | 231 | 0       | NE | 0       | NE | 0.00025 | NE |
| Spy49_0872c | -      | 872867 | 873994 | 214 | 0       | NE | 0       | NE | 0       | NE |
| Spy49_0873c | prs    | 873991 | 874971 | 115 | 0.00025 | NE | 0       | NE | 0       | NE |
| Spy49_0874c | -      | 875111 | 875689 | 375 | 1       | E  | 1       | E  | 1       | E  |
| Spy49_0875c | -      | 875777 | 876448 | 326 | 0.00025 | NE | 0       | NE | 0.00025 | NE |
| Spy49_0876c | ppnK   | 876423 | 877259 | 192 | 0       | NE | 0       | NE | 0.912   | U  |
| Spy49_0877  | rluD   | 877256 | 878161 | 223 | 0.00025 | NE | 0       | NE | 0.00025 | NE |
| Spy49_0878  | eutD   | 878165 | 879160 | 278 | 1       | E  | 1       | E  | 1       | E  |
| Spy49_0879  | -      | 879286 | 880041 | 301 | 0       | NE | 0       | NE | 0       | NE |
| Spy49_0880  | -      | 880235 | 880924 | 331 | 0       | NE | 0       | NE | 0       | NE |
| Spy49_0881  | proV   | 881350 | 882078 | 251 | 0       | NE | 0       | NE | 0.0005  | NE |
| Spy49_0882c | proX   | 882071 | 883597 | 229 | 0       | NE | 0       | NE | 0       | NE |
| Spy49_0883  | -      | 883875 | 884858 | 242 | 0.00025 | NE | 0       | NE | 0.00025 | NE |
| Spy49_0884  | -      | 884895 | 885152 | 508 | 0       | NE | 0       | NE | 0.00025 | NE |
| Spy49_0885  | xpt    | 885163 | 885744 | 327 | 0       | NE | 0       | NE | 0       | NE |
| Spy49_0886c | -      | 885744 | 887027 | 85  | 0       | NE | 0       | NE | 0       | NE |
| Spy49_0887  | -      | 887091 | 888029 | 193 | 0.00025 | NE | 0       | NE | 0       | NE |
| Spy49_0888  | -      | 888082 | 888267 | 427 | 0       | NE | 0       | NE | 0       | NE |
| Spy49_0891c | tdk    | 888405 | 888974 | 312 | 0       | NE | 0       | NE | 0       | NE |
| Spy49_0892c | prfA   | 889009 | 890088 | 61  | 0       | NE | 0       | NE | 0       | NE |
| Spy49_0893  | hemK   | 890088 | 890927 | 189 | 0       | NE | 0       | NE | 0       | NE |
| Spy49_0894  | -      | 890911 | 891501 | 359 | 1       | E  | 1       | E  | 1       | E  |
| Spy49_0895  | -      | 891519 | 891971 | 279 | 0.00025 | NE | 0       | NE | 0.06075 | U  |
| Spy49_0896  | glyA   | 891961 | 893217 | 196 | 0.8395  | U  | 1       | E  | 1       | E  |
| Spy49_0897  | -      | 893224 | 894201 | 150 | 0.00025 | NE | 0       | NE | 0       | NE |
| Spy49_0898  | -      | 894202 | 894801 | 418 | 0       | NE | 0       | NE | 0       | NE |
| Spy49_0899  | -      | 894811 | 896535 | 325 | 0       | NE | 0       | NE | 0.0595  | U  |
| Spy49_0900  | -      | 896532 | 898247 | 199 | 0.00025 | NE | 0       | NE | 0.00025 | NE |
| Spy49_0901  | nox1   | 898500 | 899870 | 574 | 0       | NE | 0       | NE | 0.064   | U  |
| Spy49_0902  | ldh    | 900029 | 901012 | 571 | 0.00025 | NE | 0       | NE | 0.00025 | NE |
| Spy49_0903  | gyrA   | 901203 | 903689 | 456 | 0       | NE | 0       | NE | 0       | NE |
| Spy49_0904c | -      | 903709 | 904458 | 327 | 0.00025 | NE | 0.00425 | NE | 1       | E  |
| Spy49_0905  | -      | 904538 | 904954 | 828 | 1       | E  | 1       | E  | 1       | E  |
| Spy49_0906  | -      | 905603 | 906007 | 249 | 0.00025 | NE | 0.80075 | U  | 0.999   | E  |
| Spy49_0907  | -      | 906057 | 906968 | 138 | 0.00025 | NE | 0       | NE | 0.99625 | E  |
| Spy49_0908  | hlyIII | 907220 | 907735 | 134 | 0       | NE | 0       | NE | 0       | NE |
| Spy49_0909c | -      | 907732 | 908172 | 303 | 0.00025 | NE | 0       | NE | 0.00025 | NE |
| Spy49_0910c | rbgA   | 908391 | 909239 | 171 | 0.99975 | E  | 1       | E  | 1       | E  |
| Spy49_0911c | rnhB   | 909229 | 910020 | 146 | 0.00875 | NE | 0       | NE | 0       | NE |
| Spy49_0912  | smf    | 910085 | 910921 | 282 | 0.916   | U  | 1       | E  | 1       | E  |
| Spy49_0913  | topA   | 911028 | 913157 | 263 | 0       | NE | 0       | NE | 0       | NE |
| Spy49_0914  | -      | 913233 | 913715 | 278 | 0       | NE | 0       | NE | 0       | NE |
| Spy49_0915  | -      | 913722 | 913844 | 709 | 1       | E  | 1       | E  | 1       | E  |
| Spy49_0916c | -      | 914130 | 914696 | 160 | 0       | NE | 0       | NE | 0       | NE |
| Spy49_0917c | -      | 914711 | 915703 | 40  | -1      | S  | -1      | S  | -1      | S  |
| Spy49_0918  | -      | 915808 | 916473 | 188 | 0       | NE | 0       | NE | 0       | NE |
| Spy49_0919  | -      | 916466 | 917182 | 330 | 0.00025 | NE | 0       | NE | 0.00025 | NE |
| Spy49_0920  | gid    | 917333 | 918679 | 221 | 0.998   | E  | 1       | E  | 1       | E  |
| Spy49_0921  | -      | 918856 | 920238 | 238 | 0       | NE | 0       | NE | 0       | NE |
| Spy49_0922  | -      | 920281 | 920595 | 448 | 0       | NE | 0       | NE | 0.9835  | U  |
| Spy49_0923  | -      | 920595 | 920945 | 460 | 0.00025 | NE | 0       | NE | 0.00025 | NE |
| Spy49_0924  | -      | 920955 | 922085 | 104 | 0       | NE | 0       | NE | 0.00125 | NE |
| Spy49_0925  | citG   | 922286 | 923170 | 116 | 0.00025 | NE | 0       | NE | 0       | NE |
| Spy49_0926  | -      | 923163 | 923858 | 376 | 0       | NE | 0       | NE | 0.7035  | U  |
| Spy49_0927c | -      | 924016 | 925422 | 294 | 0       | NE | 0       | NE | 0       | NE |
| Spy49_0928c | -      | 925799 | 926122 | 231 | 0.00025 | NE | 0       | NE | 0       | NE |
| Spy49_0929c | -      | 926611 | 927732 | 468 | 0       | NE | 0       | NE | 0       | NE |
| Spy49_0930  | citD   | 927920 | 928228 | 107 | 0       | NE | 0       | NE | 0       | NE |
| Spy49_0933  | citE   | 928216 | 929103 | 373 | 0.00175 | NE | 0       | NE | 0       | NE |
| Spy49_0934  | citF   | 929106 | 930638 | 102 | 0.00025 | NE | 0       | NE | 0       | NE |
| Spy49_0936  | citX   | 930535 | 931209 | 295 | 0.115   | U  | 0       | NE | 0       | NE |
| Spy49_0937  | oadA   | 931224 | 932618 | 510 | 0       | NE | 0       | NE | 0       | NE |

|             |       |         |         |     |         |    |         |    |         |    |
|-------------|-------|---------|---------|-----|---------|----|---------|----|---------|----|
| Spy49_0938  | citC  | 932729  | 933781  | 224 | 0.00025 | NE | 0       | NE | 0       | NE |
| Spy49_0939  | -     | 933968  | 934351  | 464 | 0.00025 | NE | 0       | NE | 0       | NE |
| Spy49_0940c | xerS  | 935045  | 936115  | 350 | 0       | NE | 0       | NE | 0       | NE |
| Spy49_0942c | -     | 936585  | 937283  | 127 | 0       | NE | 0       | NE | 0       | NE |
| Spy49_0943c | ffh   | 937400  | 938962  | 356 | 0.0035  | NE | 0.00025 | NE | 0.9995  | E  |
| Spy49_0944  | -     | 938977  | 939318  | 232 | 0.00025 | NE | 0       | NE | 0       | NE |
| Spy49_0945c | -     | 939407  | 940105  | 520 | 1       | E  | 1       | E  | 1       | E  |
| Spy49_0946c | -     | 940188  | 941477  | 113 | 0.99725 | E  | 0.02475 | NE | 0.00025 | NE |
| Spy49_0947c | guaA  | 941789  | 943351  | 232 | 0.00025 | NE | 0       | NE | 0.00025 | NE |
| Spy49_0948c | murM2 | 943393  | 944604  | 429 | 0       | NE | 0       | NE | 0       | NE |
| Spy49_0949  | -     | 944959  | 946524  | 520 | 0.2225  | U  | 0       | NE | 0.99675 | E  |
| Spy49_0951c | -     | 946637  | 947194  | 403 | 0       | NE | 0       | NE | 0.00025 | NE |
| Spy49_0952c | pdxK  | 947172  | 948038  | 521 | 0       | NE | 0       | NE | 0       | NE |
| Spy49_0953c | -     | 948128  | 949396  | 185 | 0       | NE | 0       | NE | 0       | NE |
| Spy49_0954c | -     | 949867  | 950223  | 288 | 0       | NE | 0       | NE | 0       | NE |
| Spy49_0955  | -     | 950545  | 952122  | 422 | 0       | NE | 0       | NE | 0.00025 | NE |
| Spy49_0957c | fhs1  | 952207  | 953877  | 118 | 0       | NE | 0       | NE | 0       | NE |
| Spy49_0958c | lplA  | 954005  | 955024  | 525 | 0.00025 | NE | 1       | E  | 0.998   | E  |
| Spy49_0959c | -     | 955071  | 955952  | 556 | 0.97375 | U  | 0.00975 | NE | 1       | E  |
| Spy49_0960c | -     | 955945  | 956757  | 339 | 0       | NE | 0       | NE | 0.00025 | NE |
| Spy49_0961c | -     | 956750  | 957082  | 293 | 0.00025 | NE | 0       | NE | 0.00025 | NE |
| Spy49_0962c | -     | 957124  | 958122  | 270 | 0.00025 | NE | 0       | NE | 0       | NE |
| Spy49_0963c | -     | 958119  | 959318  | 110 | 0       | NE | 0       | NE | 0       | NE |
| Spy49_0964c | -     | 959315  | 960151  | 332 | 0.00025 | NE | 0       | NE | 0       | NE |
| Spy49_0965c | dpfB  | 960347  | 961039  | 399 | 0.00025 | NE | 0       | NE | 0       | NE |
| Spy49_0966c | dfp   | 961032  | 961577  | 278 | 0       | NE | 0       | NE | 0       | NE |
| Spy49_0967  | -     | 961636  | 962205  | 230 | 0.00025 | NE | 1       | E  | 0.99975 | E  |
| Spy49_0968  | pgmA  | 962381  | 964099  | 181 | 0.99975 | E  | 1       | E  | 1       | E  |
| Spy49_0969  | -     | 964312  | 965268  | 189 | 0.00025 | NE | 0       | NE | 1       | E  |
| Spy49_0970  | -     | 965270  | 966334  | 572 | 0.998   | E  | 1       | E  | 1       | E  |
| Spy49_0971c | -     | 966327  | 967859  | 318 | 0       | NE | 0       | NE | 0       | NE |
| Spy49_0972c | -     | 967998  | 969050  | 354 | 0       | NE | 0       | NE | 0       | NE |
| Spy49_0973c | cdd   | 969144  | 969533  | 510 | 0       | NE | 0       | NE | 0       | NE |
| Spy49_0974c | -     | 970186  | 970779  | 350 | 0.03775 | NE | 0       | NE | 0       | NE |
| Spy49_0975c | coaA  | 971047  | 971967  | 129 | 0       | NE | 0       | NE | 0       | NE |
| Spy49_0976c | rpsT  | 972036  | 972269  | 197 | 0       | NE | 0       | NE | 0       | NE |
| Spy49_0977  | ciaH  | 972394  | 973704  | 306 | 0.8445  | U  | 1       | E  | 1       | E  |
| Spy49_0978  | ciaR  | 973697  | 974371  | 77  | 0.00275 | NE | 0       | NE | 0.9535  | U  |
| Spy49_0979c | pepN  | 974718  | 977255  | 436 | 0.00025 | NE | 0.00075 | NE | 0.9995  | E  |
| Spy49_0980c | phoU  | 977460  | 978113  | 224 | 0.00025 | NE | 1       | E  | 1       | E  |
| Spy49_0981c | pstB  | 978182  | 978940  | 845 | 0.00025 | NE | 0       | NE | 0.00025 | NE |
| Spy49_0982c | pstB2 | 978953  | 979756  | 217 | 0.00025 | NE | 0       | NE | 0.0005  | NE |
| Spy49_0983c | pstA  | 979772  | 980659  | 252 | 0.99475 | E  | 0       | NE | 0.00025 | NE |
| Spy49_0984c | pstC  | 980649  | 981584  | 267 | 0.00025 | NE | 0       | NE | 0.99875 | E  |
| Spy49_0985c | pstS  | 981595  | 982461  | 295 | 0.00025 | NE | 0       | NE | 0.88725 | U  |
| Spy49_0986  | -     | 982600  | 983910  | 311 | 0.99925 | E  | 0.00025 | NE | 0.98675 | U  |
| Spy49_0987c | -     | 983913  | 984701  | 288 | 0.36625 | U  | 0       | NE | 0.63625 | U  |
| Spy49_0988c | -     | 984691  | 984969  | 436 | 0.99975 | E  | 1       | E  | 1       | E  |
| Spy49_0989c | spxA  | 984971  | 985375  | 262 | 0       | NE | 0.00025 | NE | 0.00025 | NE |
| Spy49_0990c | -     | 985418  | 986350  | 92  | 0.00025 | NE | 0       | NE | 0       | NE |
| Spy49_0991c | truB  | 986340  | 987263  | 134 | 0       | NE | 0       | NE | 0.00025 | NE |
| Spy49_0992c | -     | 987379  | 988719  | 310 | 0.992   | U  | 1       | E  | 1       | E  |
| Spy49_0993c | -     | 988816  | 989772  | 307 | 0       | NE | 0       | NE | 0       | NE |
| Spy49_0994c | -     | 989783  | 990379  | 446 | 0.00025 | NE | 0       | NE | 0.00025 | NE |
| Spy49_0995c | -     | 990471  | 993107  | 318 | 0       | NE | 0       | NE | 0.00025 | NE |
| Spy49_0996c | -     | 993122  | 993823  | 198 | 0       | NE | 0       | NE | 0       | NE |
| Spy49_0997c | -     | 993941  | 994483  | 878 | 0       | NE | 0       | NE | 0.00025 | NE |
| Spy49_0998c | -     | 994638  | 995267  | 233 | 0       | NE | 0       | NE | 0.00025 | NE |
| Spy49_0999  | -     | 995430  | 995918  | 180 | 0       | NE | 0       | NE | 0.00025 | NE |
| Spy49_1000c | -     | 995929  | 996129  | 209 | 0.00025 | NE | 0       | NE | 0.00025 | NE |
| Spy49_1001c | -     | 996170  | 996709  | 162 | 0       | NE | 0       | NE | 0       | NE |
| Spy49_1002c | -     | 996722  | 996910  | 66  | 0       | NE | 0       | NE | 0       | NE |
| Spy49_1003c | -     | 996921  | 997508  | 179 | 0.00025 | NE | 0       | NE | 0       | NE |
| Spy49_1004c | -     | 997569  | 997817  | 62  | 0.16625 | U  | 0.0005  | NE | 0.008   | NE |
| Spy49_1005c | pcrA  | 998180  | 1000498 | 195 | 0.00025 | NE | 0       | NE | 0       | NE |
| Spy49_1006c | -     | 1001027 | 1002349 | 82  | 0       | NE | 0       | NE | 0       | NE |
| Spy49_1007c | -     | 1002469 | 1003704 | 772 | 0.00025 | NE | 1       | E  | 1       | E  |
| Spy49_1008  | cfa   | 1004074 | 1004847 | 440 | 0       | NE | 0       | NE | 0.24275 | U  |

|             |       |         |         |      |         |    |         |    |         |    |
|-------------|-------|---------|---------|------|---------|----|---------|----|---------|----|
| Spy49_1009  | -     | 1005217 | 1006053 | 411  | 0.00025 | NE | 0       | NE | 0       | NE |
| Spy49_1010c | -     | 1006069 | 1006698 | 257  | 0.00025 | NE | 0       | NE | 0.00025 | NE |
| Spy49_1011c | -     | 1006708 | 1007349 | 278  | 0.00025 | NE | 0       | NE | 0.00025 | NE |
| Spy49_1012c | -     | 1007456 | 1007791 | 209  | 0       | NE | 0       | NE | 0       | NE |
| Spy49_1013c | glmS  | 1007987 | 1009801 | 213  | 0.00025 | NE | 0       | NE | 0       | NE |
| Spy49_1014c | sipC  | 1009977 | 1010534 | 111  | 0       | NE | 0       | NE | 0       | NE |
| Spy49_1015c | pyk   | 1010752 | 1012254 | 604  | 1       | E  | 1       | E  | 1       | E  |
| Spy49_1016c | pfk   | 1012317 | 1013330 | 185  | 0.00025 | NE | 0       | NE | 0.0015  | NE |
| Spy49_1017c | dnaE  | 1013410 | 1016520 | 500  | 1       | E  | 1       | E  | 1       | E  |
| Spy49_1018c | -     | 1016705 | 1017076 | 337  | 0.99575 | E  | 1       | E  | 1       | E  |
| Spy49_1019c | -     | 1017076 | 1017774 | 1036 | 1       | E  | 1       | E  | 1       | E  |
| Spy49_1020  | -     | 1017784 | 1018569 | 123  | 0.00025 | NE | 0       | NE | 0.00025 | NE |
| Spy49_1021  | -     | 1018706 | 1019311 | 232  | 0.00025 | NE | 0.0345  | NE | 0.99975 | E  |
| Spy49_1022  | -     | 1020050 | 1020670 | 261  | 0.08325 | U  | 0.00025 | NE | 1       | E  |
| Spy49_1023c | glgP  | 1020927 | 1023191 | 201  | 0.00025 | NE | 1       | E  | 1       | E  |
| Spy49_1024  | malQ  | 1023226 | 1024719 | 206  | 0.00025 | NE | 0       | NE | 0       | NE |
| Spy49_1025c | malR  | 1024834 | 1025853 | 754  | 0.00025 | NE | 0       | NE | 0.00025 | NE |
| Spy49_1026c | malE  | 1026097 | 1027344 | 497  | 0.00025 | NE | 0       | NE | 0.0005  | NE |
| Spy49_1027c | malF  | 1027618 | 1028979 | 339  | 0.00025 | NE | 0.00075 | NE | 0.00375 | NE |
| Spy49_1028  | malG  | 1028979 | 1029815 | 415  | 0       | NE | 0       | NE | 0       | NE |
| Spy49_1029  | -     | 1029996 | 1030982 | 453  | 0.00025 | NE | 0       | NE | 0.00025 | NE |
| Spy49_1030  | -     | 1031207 | 1031431 | 278  | 0       | NE | 0       | NE | 0.00025 | NE |
| Spy49_1819c | -     | 1031496 | 1032479 | 328  | 0       | NE | 0       | NE | 0       | NE |
| Spy49_1033c | dltD  | 1032510 | 1033760 | 327  | 0       | NE | 0       | NE | 0       | NE |
| Spy49_1034c | dltC  | 1033753 | 1033992 | 416  | 0.00025 | NE | 0       | NE | 0.00025 | NE |
| Spy49_1035c | dltB  | 1034010 | 1035266 | 79   | 0.00025 | NE | 0       | NE | 0       | NE |
| Spy49_1036c | dltA  | 1035263 | 1036801 | 418  | 0.00025 | NE | 0       | NE | 0.13625 | U  |
| Spy49_1037c | -     | 1036813 | 1036956 | 512  | 0.00025 | NE | 0       | NE | 0.888   | U  |
| Spy49_1038c | uvrB  | 1037219 | 1039210 | 47   | -1      | S  | -1      | S  | -1      | S  |
| Spy49_1039c | glnP  | 1039403 | 1041577 | 663  | 0.00025 | NE | 0       | NE | 0.00025 | NE |
| Spy49_1040  | glnQ  | 1041577 | 1042317 | 724  | 0.00725 | NE | 0       | NE | 1       | E  |
| Spy49_1041  | -     | 1042465 | 1042617 | 246  | 0.00025 | NE | 0       | NE | 0.99975 | E  |
| Spy49_1042c | -     | 1042614 | 1043993 | 50   | -1      | S  | -1      | S  | -1      | S  |
| Spy49_1043c | -     | 1044171 | 1044620 | 459  | 0       | NE | 0       | NE | 0.003   | NE |
| Spy49_1044c | -     | 1044617 | 1044952 | 149  | 0       | NE | 0       | NE | 0.00025 | NE |
| Spy49_1045c | -     | 1044955 | 1045266 | 111  | 0.00025 | NE | 0       | NE | 0.00025 | NE |
| Spy49_1046c | -     | 1045289 | 1047283 | 103  | 0       | NE | 0       | NE | 0       | NE |
| Spy49_1047c | -     | 1047389 | 1048483 | 664  | 0       | NE | 0       | NE | 0.775   | U  |
| Spy49_1048c | -     | 1048492 | 1049892 | 364  | 0       | NE | 0       | NE | 0.00025 | NE |
| Spy49_1049c | -     | 1050117 | 1050812 | 466  | 0.00025 | NE | 0       | NE | 0.00025 | NE |
| Spy49_1050  | -     | 1050817 | 1050975 | 231  | 0.00025 | NE | 0       | NE | 0.00025 | NE |
| Spy49_1051c | obgE  | 1051044 | 1052357 | 52   | -1      | S  | -1      | S  | -1      | S  |
| Spy49_1053c | -     | 1052786 | 1053181 | 437  | 0.81525 | U  | 1       | E  | 1       | E  |
| Spy49_1054  | -     | 1053321 | 1054199 | 131  | 0       | NE | 0       | NE | 0       | NE |
| Spy49_1055  | -     | 1054597 | 1055097 | 292  | 0.00025 | NE | 0       | NE | 0.00025 | NE |
| Spy49_1056  | -     | 1055100 | 1055906 | 166  | 0       | NE | 0       | NE | 0       | NE |
| Spy49_1057  | -     | 1057303 | 1058613 | 268  | 0.00025 | NE | 0       | NE | 0.00025 | NE |
| Spy49_1059  | -     | 1058770 | 1058985 | 436  | 0       | NE | 0       | NE | 0       | NE |
| Spy49_1060  | -     | 1059129 | 1059314 | 71   | 0       | NE | 0       | NE | 0.18975 | U  |
| Spy49_1062  | rsuA  | 1059757 | 1060488 | 61   | 0       | NE | 0       | NE | 0.00025 | NE |
| Spy49_1064c | -     | 1060603 | 1060968 | 243  | 0       | NE | 0       | NE | 0.32225 | U  |
| Spy49_1065  | -     | 1061088 | 1062308 | 121  | 0       | NE | 0       | NE | 0       | NE |
| Spy49_1066c | -     | 1062720 | 1064165 | 406  | 0.0005  | NE | 0       | NE | 0.00025 | NE |
| Spy49_1067  | -     | 1064270 | 1064671 | 481  | 0.00025 | NE | 0       | NE | 0.00025 | NE |
| Spy49_1070c | -     | 1064835 | 1065269 | 133  | 0       | NE | 0       | NE | 0       | NE |
| Spy49_1071c | -     | 1065688 | 1067046 | 144  | 0       | NE | 0       | NE | 0       | NE |
| Spy49_1072c | psr   | 1067128 | 1068579 | 452  | 0       | NE | 0       | NE | 0.00025 | NE |
| Spy49_1073c | aroK  | 1068787 | 1069278 | 483  | 0       | NE | 0       | NE | 0       | NE |
| Spy49_1074c | aroA1 | 1069271 | 1070554 | 163  | 0       | NE | 0       | NE | 0.00025 | NE |
| Spy49_1075c | -     | 1070665 | 1071630 | 427  | 0       | NE | 0       | NE | 0.00025 | NE |
| Spy49_1076c | map   | 1071632 | 1072492 | 321  | 0.01175 | NE | 0       | NE | 0       | NE |
| Spy49_1077c | -     | 1072508 | 1073791 | 286  | 0.042   | U  | 1       | E  | 0.993   | E  |
| Spy49_1078c | -     | 1073800 | 1074342 | 427  | 0       | NE | 0       | NE | 0.51825 | U  |
| Spy49_1079c | grab  | 1074609 | 1075148 | 180  | 0       | NE | 0       | NE | 0       | NE |
| Spy49_1080c | murZ  | 1075506 | 1076765 | 179  | 0       | NE | 0       | NE | 0       | NE |
| Spy49_1082c | metK  | 1076939 | 1078135 | 419  | 0       | NE | 0       | NE | 0       | NE |
| Spy49_1083c | inlA  | 1078672 | 1081050 | 398  | 1       | E  | 1       | E  | 1       | E  |
| Spy49_1084c | birA  | 1081425 | 1082195 | 792  | 0.0275  | NE | 0       | NE | 0.00025 | NE |

|             |       |         |         |     |         |    |         |    |         |    |
|-------------|-------|---------|---------|-----|---------|----|---------|----|---------|----|
| Spy49_1085  | -     | 1082170 | 1082373 | 256 | 0.00025 | NE | 1       | E  | 1       | E  |
| Spy49_1086c | dnaX  | 1082469 | 1084139 | 67  | 0       | NE | 0       | NE | 0.00025 | NE |
| Spy49_1087c | -     | 1084139 | 1084636 | 556 | 1       | E  | 1       | E  | 1       | E  |
| Spy49_1088c | -     | 1084842 | 1085591 | 165 | 0       | NE | 0       | NE | 0       | NE |
| Spy49_1089  | udk   | 1085989 | 1086615 | 249 | 0       | NE | 0       | NE | 0       | NE |
| Spy49_1090c | deaD2 | 1086713 | 1087798 | 208 | 0       | NE | 0       | NE | 0       | NE |
| Spy49_1091  | -     | 1087909 | 1089183 | 361 | 0       | NE | 0       | NE | 0       | NE |
| Spy49_1092c | gapN  | 1089304 | 1090707 | 424 | 0       | NE | 0       | NE | 0       | NE |
| Spy49_1093c | ptsl  | 1090892 | 1092625 | 467 | 1       | E  | 1       | E  | 1       | E  |
| Spy49_1094c | ptsH  | 1092630 | 1092893 | 577 | 0.63275 | U  | 0.00725 | NE | 1       | E  |
| Spy49_1095c | nrdH  | 1093253 | 1093504 | 87  | 0.959   | U  | 0.11725 | U  | 0.94925 | U  |
| Spy49_1096  | nrdE1 | 1093524 | 1095683 | 83  | 0       | NE | 0       | NE | 0       | NE |
| Spy49_1097  | nrdF1 | 1095664 | 1095981 | 719 | 0.0005  | NE | 0       | NE | 0.003   | NE |
| Spy49_1098  | nrdF  | 1096016 | 1096975 | 105 | 0       | NE | 0       | NE | 0       | NE |
| Spy49_1099  | -     | 1096950 | 1098263 | 319 | 0       | NE | 0       | NE | 0.00075 | NE |
| Spy49_1100  | -     | 1098401 | 1098694 | 437 | 0.00025 | NE | 0       | NE | 0.00025 | NE |
| Spy49_1101  | -     | 1099127 | 1099297 | 97  | 0       | NE | 0       | NE | 0.0715  | U  |
| Spy49_1103  | -     | 1099337 | 1099558 | 56  | -1      | S  | -1      | S  | -1      | S  |
| Spy49_1104  | -     | 1099651 | 1100346 | 73  | 0       | NE | 0       | NE | 0       | NE |
| Spy49_1105c | -     | 1100365 | 1101126 | 231 | 0       | NE | 0       | NE | 0       | NE |
| Spy49_1106c | -     | 1101123 | 1101353 | 253 | 0       | NE | 0       | NE | 0       | NE |
| Spy49_1107c | alaS  | 1101699 | 1104317 | 76  | 0.0235  | NE | 0       | NE | 0       | NE |
| Spy49_1108c | prsA  | 1104704 | 1105759 | 872 | 1       | E  | 1       | E  | 1       | E  |
| Spy49_1109c | -     | 1105822 | 1106529 | 351 | 0       | NE | 0       | NE | 0       | NE |
| Spy49_1110c | -     | 1106595 | 1107791 | 235 | 0.00025 | NE | 0       | NE | 0       | NE |
| Spy49_1111c | pepB  | 1108168 | 1109973 | 398 | 0.00025 | NE | 0       | NE | 0.00025 | NE |
| Spy49_1112c | -     | 1109986 | 1110948 | 601 | 0.00025 | NE | 0       | NE | 0.00025 | NE |
| Spy49_1113c | -     | 1111245 | 1111961 | 320 | 0       | NE | 0       | NE | 0.00025 | NE |
| Spy49_1114c | nagB  | 1112080 | 1112784 | 238 | 0       | NE | 0       | NE | 0       | NE |
| Spy49_1115c | queA  | 1112986 | 1114014 | 234 | 0       | NE | 0       | NE | 0       | NE |
| Spy49_1116  | -     | 1114021 | 1115241 | 342 | 0       | NE | 0       | NE | 0.00025 | NE |
| Spy49_1117  | -     | 1115355 | 1115945 | 406 | 0       | NE | 0       | NE | 0.00025 | NE |
| Spy49_1119c | -     | 1115942 | 1116190 | 196 | 0       | NE | 0       | NE | 0.00025 | NE |
| Spy49_1120c | -     | 1116175 | 1116402 | 82  | 0       | NE | 0       | NE | 0       | NE |
| Spy49_1121c | sodM  | 1116524 | 1117168 | 75  | 0.57725 | U  | 0       | NE | 0.96925 | U  |
| Spy49_1122c | hoIA  | 1117265 | 1118305 | 214 | 0       | NE | 0       | NE | 0       | NE |
| Spy49_1123c | comEC | 1118376 | 1120619 | 346 | 1       | E  | 1       | E  | 1       | E  |
| Spy49_1124c | comE  | 1120600 | 1121262 | 747 | 0       | NE | 0       | NE | 0.00025 | NE |
| Spy49_1126c | -     | 1121462 | 1122202 | 220 | 0       | NE | 0       | NE | 0.008   | NE |
| Spy49_1127c | -     | 1122242 | 1123096 | 246 | 1       | E  | 1       | E  | 1       | E  |
| Spy49_1128  | -     | 1123086 | 1123364 | 284 | 0.00025 | NE | 0       | NE | 0       | NE |
| Spy49_1129  | kup   | 1123388 | 1125388 | 92  | 0       | NE | 0       | NE | 0.00025 | NE |
| Spy49_1130c | deaD1 | 1125516 | 1127135 | 666 | 0.00025 | NE | 0       | NE | 0       | NE |
| Spy49_1132c | prfC  | 1127442 | 1128986 | 539 | 0       | NE | 0       | NE | 0       | NE |
| Spy49_1133c | -     | 1129234 | 1129929 | 514 | 0       | NE | 0       | NE | 0.00025 | NE |
| Spy49_1135c | murF  | 1130009 | 1131400 | 231 | 0       | NE | 0       | NE | 0.00025 | NE |
| Spy49_1136c | ddl   | 1131591 | 1132637 | 463 | 1       | E  | 1       | E  | 1       | E  |
| Spy49_1137c | recR  | 1132738 | 1133334 | 348 | 1       | E  | 1       | E  | 1       | E  |
| Spy49_1138c | -     | 1133381 | 1133572 | 198 | 0.00725 | NE | 0       | NE | 0.99875 | E  |
| Spy49_1139c | fdhC  | 1134132 | 1134947 | 63  | 0       | NE | 0       | NE | 0.02225 | NE |
| Spy49_1140c | -     | 1135034 | 1135576 | 271 | 0       | NE | 0       | NE | 0.00025 | NE |
| Spy49_1141c | -     | 1135737 | 1136258 | 180 | 0.00025 | NE | 0       | NE | 0.00025 | NE |
| Spy49_1142c | gpmA  | 1136365 | 1137060 | 173 | 0.00025 | NE | 0       | NE | 0.00025 | NE |
| Spy49_1143c | pyrD  | 1137357 | 1138238 | 231 | 0.996   | E  | 1       | E  | 0.9925  | E  |
| Spy49_1144  | -     | 1138293 | 1138466 | 293 | 0       | NE | 0       | NE | 0       | NE |
| Spy49_1145c | cadA  | 1138538 | 1140400 | 57  | -1      | S  | -1      | S  | -1      | S  |
| Spy49_1146c | -     | 1140732 | 1141007 | 620 | 0.00025 | NE | 0       | NE | 0.062   | U  |
| Spy49_1147c | -     | 1141106 | 1141693 | 91  | 0.00025 | NE | 1       | E  | 0.84025 | U  |
| Spy49_1148c | -     | 1141671 | 1142513 | 195 | 0.00025 | NE | 0       | NE | 0.00025 | NE |
| Spy49_1149c | -     | 1142506 | 1143357 | 280 | 0       | NE | 0       | NE | 0.0005  | NE |
| Spy49_1150c | -     | 1143573 | 1144529 | 283 | 0       | NE | 0.00025 | NE | 0.9995  | E  |
| Spy49_1151c | recN  | 1144701 | 1146362 | 318 | 0       | NE | 0       | NE | 0       | NE |
| Spy49_1152c | -     | 1146383 | 1146853 | 553 | 0.00025 | NE | 0       | NE | 0       | NE |
| Spy49_1153c | -     | 1146840 | 1147667 | 156 | 0       | NE | 0       | NE | 0       | NE |
| Spy49_1154c | fps   | 1147867 | 1148532 | 275 | 0       | NE | 0       | NE | 0       | NE |
| Spy49_1155c | xseB  | 1148532 | 1148747 | 221 | 0       | NE | 0       | NE | 0       | NE |
| Spy49_1156c | xseA  | 1148725 | 1150065 | 71  | 0       | NE | 0       | NE | 0       | NE |
| Spy49_1157c | folD  | 1150218 | 1151072 | 446 | 0       | NE | 0       | NE | 0       | NE |



|             |        |         |         |      |         |    |         |    |         |    |
|-------------|--------|---------|---------|------|---------|----|---------|----|---------|----|
| Spy49_1158c | -      | 1151280 | 1152974 | 284  | 0.00025 | NE | 0       | NE | 0.98475 | U  |
| Spy49_1159c | phr    | 1153152 | 1154561 | 564  | 0.00025 | NE | 0       | NE | 0       | NE |
| Spy49_1160c | gtr    | 1154710 | 1155444 | 469  | 0.00025 | NE | 0       | NE | 0.00025 | NE |
| Spy49_1161c | -      | 1155444 | 1156130 | 244  | 0       | NE | 0       | NE | 0.00025 | NE |
| Spy49_1162c | -      | 1156257 | 1156487 | 228  | 0.00025 | NE | 0       | NE | 0.00025 | NE |
| Spy49_1163c | clpE   | 1156785 | 1159067 | 76   | 0.8645  | U  | 0.006   | NE | 0.878   | U  |
| Spy49_1164  | mutT   | 1159195 | 1159650 | 760  | 0.00025 | NE | 0       | NE | 0.00075 | NE |
| Spy49_1165  | -      | 1159701 | 1160003 | 151  | 0       | NE | 0       | NE | 0       | NE |
| Spy49_1166  | ileS   | 1160268 | 1163024 | 100  | 0.00025 | NE | 0       | NE | 0.00025 | NE |
| Spy49_1167c | divIVA | 1163342 | 1164100 | 918  | 1       | E  | 1       | E  | 1       | E  |
| Spy49_1168c | -      | 1164110 | 1164901 | 252  | 0.00025 | NE | 0       | NE | 0.204   | U  |
| Spy49_1169c | -      | 1164901 | 1165155 | 263  | 0.00025 | NE | 0       | NE | 0       | NE |
| Spy49_1170c | -      | 1165160 | 1165828 | 84   | 0       | NE | 0       | NE | 0.0005  | NE |
| Spy49_1171c | -      | 1165828 | 1166499 | 222  | 0.91975 | U  | 0.00025 | NE | 1       | E  |
| Spy49_1172c | ftsZ   | 1166502 | 1167821 | 223  | 0       | NE | 0       | NE | 0       | NE |
| Spy49_1173c | ftsA   | 1167845 | 1169209 | 439  | 1       | E  | 1       | E  | 1       | E  |
| Spy49_1174c | ftsQ   | 1169420 | 1170568 | 454  | 1       | E  | 1       | E  | 1       | E  |
| Spy49_1175c | murG   | 1170569 | 1171651 | 382  | 0.00025 | NE | 1       | E  | 0.99975 | E  |
| Spy49_1176c | murD   | 1171651 | 1173009 | 360  | 1       | E  | 1       | E  | 1       | E  |
| Spy49_1177c | -      | 1173365 | 1173616 | 452  | 1       | E  | 1       | E  | 1       | E  |
| Spy49_1178c | -      | 1173738 | 1175579 | 83   | 0       | NE | 0       | NE | 0       | NE |
| Spy49_1179c | -      | 1175762 | 1176151 | 613  | 0       | NE | 0       | NE | 0       | NE |
| Spy49_1180c | -      | 1176161 | 1177132 | 129  | 0       | NE | 0       | NE | 0.00025 | NE |
| Spy49_1181c | -      | 1177137 | 1177340 | 323  | 0       | NE | 0       | NE | 0.00025 | NE |
| Spy49_1182c | -      | 1177482 | 1178009 | 67   | 0       | NE | 0       | NE | 0       | NE |
| Spy49_1183c | -      | 1178237 | 1178863 | 175  | 0.00025 | NE | 0       | NE | 0       | NE |
| Spy49_1184  | -      | 1178945 | 1180024 | 208  | 0       | NE | 0       | NE | 0       | NE |
| Spy49_1185c | -      | 1180028 | 1180648 | 359  | 0.00025 | NE | 0       | NE | 0       | NE |
| Spy49_1186c | -      | 1181096 | 1182073 | 206  | 0       | NE | 0       | NE | 0       | NE |
| Spy49_1187c | -      | 1182487 | 1183524 | 325  | 0.00025 | NE | 0       | NE | 0.00025 | NE |
| Spy49_1188c | coaD   | 1183511 | 1184002 | 345  | 0       | NE | 0       | NE | 0       | NE |
| Spy49_1189c | -      | 1183992 | 1184531 | 163  | 1       | E  | 1       | E  | 1       | E  |
| Spy49_1190c | asnA   | 1184654 | 1185646 | 179  | 0       | NE | 0       | NE | 0       | NE |
| Spy49_1191c | arcC   | 1185959 | 1186909 | 330  | 0       | NE | 0       | NE | 0.00025 | NE |
| Spy49_1192c | -      | 1186929 | 1188260 | 316  | 0       | NE | 0       | NE | 0.1035  | U  |
| Spy49_1193c | -      | 1188277 | 1189578 | 443  | 0       | NE | 0       | NE | 0       | NE |
| Spy49_1194c | arcB   | 1189941 | 1190954 | 433  | 0       | NE | 0       | NE | 0       | NE |
| Spy49_1195c | -      | 1190979 | 1191419 | 337  | 0.163   | U  | 0       | NE | 0       | NE |
| Spy49_1196c | arcA   | 1191519 | 1192754 | 146  | 0       | NE | 0       | NE | 0       | NE |
| Spy49_1197c | -      | 1193028 | 1193708 | 411  | 0       | NE | 0       | NE | 0       | NE |
| Spy49_1198c | argR   | 1193850 | 1194323 | 226  | 0.00025 | NE | 0       | NE | 0       | NE |
| Spy49_1199  | -      | 1194490 | 1195206 | 157  | 0       | NE | 0       | NE | 0       | NE |
| Spy49_1200c | -      | 1195220 | 1196299 | 238  | 0       | NE | 0       | NE | 0.00025 | NE |
| Spy49_1201c | yesM   | 1196372 | 1198105 | 359  | 0       | NE | 0       | NE | 0.00025 | NE |
| Spy49_1202c | yesN   | 1198102 | 1198842 | 577  | 0       | NE | 0       | NE | 0.00025 | NE |
| Spy49_1203c | msrA1  | 1198930 | 1200036 | 246  | 0       | NE | 0       | NE | 0.00025 | NE |
| Spy49_1204c | -      | 1200079 | 1200702 | 368  | 0.00025 | NE | 0       | NE | 0.0005  | NE |
| Spy49_1205c | ccdA   | 1200715 | 1201404 | 207  | 0.00025 | NE | 0       | NE | 0.00025 | NE |
| Spy49_1206c | -      | 1202097 | 1202390 | 229  | 0.00025 | NE | 0       | NE | 0       | NE |
| Spy49_1207c | -      | 1202401 | 1203426 | 97   | 0       | NE | 0       | NE | 0       | NE |
| Spy49_1208c | -      | 1203423 | 1204097 | 341  | 0       | NE | 0       | NE | 0.00025 | NE |
| Spy49_1209c | -      | 1204099 | 1204947 | 224  | 0       | NE | 0       | NE | 0.00025 | NE |
| Spy49_1210c | -      | 1204952 | 1206847 | 282  | 0       | NE | 0       | NE | 0       | NE |
| Spy49_1211c | -      | 1206847 | 1207575 | 631  | 0.12025 | U  | 0       | NE | 0.721   | U  |
| Spy49_1212c | -      | 1207708 | 1210110 | 242  | 0.00025 | NE | 0       | NE | 0.00025 | NE |
| Spy49_1213c | valS   | 1210270 | 1212918 | 800  | 0.00025 | NE | 0       | NE | 0.00025 | NE |
| Spy49_1215c | -      | 1212920 | 1213483 | 882  | 1       | E  | 1       | E  | 1       | E  |
| Spy49_1216c | -      | 1213480 | 1213659 | 187  | 0       | NE | 0       | NE | 0       | NE |
| Spy49_1217c | -      | 1214086 | 1214481 | 59   | -1      | S  | -1      | S  | -1      | S  |
| Spy49_1218c | -      | 1214499 | 1214753 | 131  | 0.9435  | U  | 0       | NE | 0       | NE |
| Spy49_1219c | aroA2  | 1215231 | 1215983 | 84   | 0.00025 | NE | 0.00325 | NE | 0.36475 | U  |
| Spy49_1220  | aroB   | 1216039 | 1217112 | 250  | 0       | NE | 0       | NE | 0       | NE |
| Spy49_1221  | -      | 1217548 | 1217853 | 357  | 0       | NE | 0       | NE | 0.00025 | NE |
| Spy49_1222c | -      | 1217855 | 1218193 | 101  | 0       | NE | 0       | NE | 0       | NE |
| Spy49_1223c | -      | 1218246 | 1219001 | 112  | 0       | NE | 0       | NE | 0       | NE |
| Spy49_1224c | aroE1  | 1219236 | 1220114 | 251  | 0       | NE | 0       | NE | 0.645   | U  |
| Spy49_1225c | -      | 1220252 | 1223668 | 292  | 0       | NE | 0       | NE | 0.00025 | NE |
| Spy49_1226c | -      | 1223688 | 1225172 | 1138 | 0       | NE | 0       | NE | 0.03425 | NE |

|             |       |         |         |     |         |    |         |    |         |    |
|-------------|-------|---------|---------|-----|---------|----|---------|----|---------|----|
| Spy49_1227c | -     | 1225172 | 1226896 | 494 | 0       | NE | 0       | NE | 0.00025 | NE |
| Spy49_1228c | -     | 1226886 | 1227491 | 574 | 0       | NE | 0       | NE | 0       | NE |
| Spy49_1229c | -     | 1227797 | 1229242 | 201 | 0       | NE | 0       | NE | 0.002   | NE |
| Spy49_1230c | -     | 1229323 | 1230249 | 481 | 0       | NE | 0       | NE | 0.02875 | NE |
| Spy49_1231c | -     | 1230259 | 1231209 | 308 | 0.536   | U  | 0       | NE | 0.00025 | NE |
| Spy49_1233c | -     | 1231405 | 1232100 | 316 | 0       | NE | 0       | NE | 0       | NE |
| Spy49_1234  | -     | 1232893 | 1234335 | 231 | 0.00025 | NE | 0       | NE | 0       | NE |
| Spy49_1235c | hyl   | 1234359 | 1236053 | 480 | 0       | NE | 0       | NE | 0       | NE |
| Spy49_1236c | -     | 1236104 | 1237144 | 564 | 0       | NE | 0       | NE | 0.03875 | U  |
| Spy49_1237c | -     | 1237277 | 1238563 | 346 | 0.00025 | NE | 0       | NE | 0.00025 | NE |
| Spy49_1238  | -     | 1238578 | 1241283 | 428 | 0       | NE | 0       | NE | 0.15425 | U  |
| Spy49_1239  | -     | 1241384 | 1242739 | 901 | 0       | NE | 0       | NE | 0.91675 | U  |
| Spy49_1240c | -     | 1243405 | 1244760 | 451 | 0       | NE | 0       | NE | 0       | NE |
| Spy49_1241c | recX  | 1244875 | 1245651 | 451 | 0.00025 | NE | 0       | NE | 0.7135  | U  |
| Spy49_1242  | -     | 1245731 | 1246264 | 258 | 0       | NE | 0       | NE | 0.00025 | NE |
| Spy49_1243  | -     | 1246634 | 1246912 | 177 | 0.00025 | NE | 0       | NE | 0.06475 | U  |
| Spy49_1244  | -     | 1246927 | 1247034 | 92  | 0       | NE | 0       | NE | 0       | NE |
| Spy49_1245  | -     | 1254000 | 1254548 | 35  | -1      | S  | -1      | S  | -1      | S  |
| Spy49_1247c | comF  | 1254628 | 1255293 | 182 | 0       | NE | 0       | NE | 0.00025 | NE |
| Spy49_1248c | -     | 1255265 | 1256590 | 221 | 0       | NE | 0       | NE | 0       | NE |
| Spy49_1249c | -     | 1256646 | 1257278 | 441 | 0       | NE | 0       | NE | 0       | NE |
| Spy49_1250  | cysM  | 1257406 | 1258347 | 210 | 0.00025 | NE | 0       | NE | 0       | NE |
| Spy49_1251  | -     | 1258365 | 1258742 | 313 | 0       | NE | 0       | NE | 0       | NE |
| Spy49_1252c | -     | 1258742 | 1260142 | 125 | 0       | NE | 0       | NE | 0.993   | E  |
| Spy49_1253c | -     | 1260179 | 1260820 | 466 | 0       | NE | 0       | NE | 0.00225 | NE |
| Spy49_1254c | -     | 1260813 | 1261817 | 213 | 0.00025 | NE | 1       | E  | 0.99675 | E  |
| Spy49_1255c | -     | 1261814 | 1262506 | 334 | 0       | NE | 0       | NE | 0.00025 | NE |
| Spy49_1256c | -     | 1262629 | 1264527 | 230 | 0       | NE | 0       | NE | 0       | NE |
| Spy49_1257c | pppL  | 1264524 | 1265264 | 632 | 0.5185  | U  | 1       | E  | 1       | E  |
| Spy49_1259c | sunL  | 1265302 | 1266624 | 246 | 0.9555  | U  | 1       | E  | 1       | E  |
| Spy49_1260c | fmt   | 1266614 | 1267549 | 440 | 0       | NE | 0       | NE | 0       | NE |
| Spy49_1261c | priA  | 1267611 | 1269995 | 311 | 0.99975 | E  | 1       | E  | 1       | E  |
| Spy49_1262c | -     | 1270060 | 1270377 | 794 | 0.00025 | NE | 0.00025 | NE | 1       | E  |
| Spy49_1263c | gmk   | 1270393 | 1271028 | 105 | 0.0435  | U  | 0.00275 | NE | 0.979   | U  |
| Spy49_1265c | -     | 1271138 | 1272745 | 211 | 1       | E  | 1       | E  | 0.998   | E  |
| Spy49_1266c | -     | 1272875 | 1273771 | 535 | 0       | NE | 0       | NE | 0       | NE |
| Spy49_1267c | atoB  | 1273972 | 1275159 | 298 | 0       | NE | 0       | NE | 0       | NE |
| Spy49_1268  | atoD1 | 1275183 | 1275833 | 395 | 0       | NE | 0       | NE | 0.22225 | U  |
| Spy49_1269  | atoA  | 1275835 | 1276494 | 216 | 0       | NE | 0       | NE | 0.00025 | NE |
| Spy49_1270  | -     | 1276527 | 1277306 | 219 | 0       | NE | 0       | NE | 0       | NE |
| Spy49_1271  | -     | 1277377 | 1278708 | 259 | 0       | NE | 0       | NE | 0.00025 | NE |
| Spy49_1272  | luxS  | 1278782 | 1279264 | 443 | 0       | NE | 0       | NE | 0.00025 | NE |
| Spy49_1273  | -     | 1279411 | 1280880 | 160 | 0       | NE | 0       | NE | 0       | NE |
| Spy49_1274c | -     | 1280894 | 1282048 | 489 | 0       | NE | 0       | NE | 0.00025 | NE |
| Spy49_1275c | -     | 1282493 | 1282819 | 384 | 0       | NE | 0       | NE | 0       | NE |
| Spy49_1276c | -     | 1282947 | 1283456 | 108 | 0.99925 | E  | 1       | E  | 0.95425 | U  |
| Spy49_1277c | recU  | 1283537 | 1284145 | 169 | 0       | NE | 0       | NE | 0.00025 | NE |
| Spy49_1278  | pbp1A | 1284132 | 1286297 | 202 | 0.9875  | U  | 0.2455  | U  | 0.986   | U  |
| Spy49_1279  | pepC  | 1286764 | 1288101 | 721 | 0.95475 | U  | 1       | E  | 1       | E  |
| Spy49_1280c | nadE  | 1288286 | 1289134 | 445 | 0.00025 | NE | 0       | NE | 0       | NE |
| Spy49_1281c | -     | 1289112 | 1290566 | 282 | 1       | E  | 1       | E  | 0.998   | E  |
| Spy49_1282c | aapA  | 1290737 | 1292116 | 484 | 0.9995  | E  | 1       | E  | 1       | E  |
| Spy49_1283c | nox2  | 1292285 | 1293202 | 459 | 0.00025 | NE | 0       | NE | 0       | NE |
| Spy49_1284c | -     | 1293266 | 1293490 | 305 | 0       | NE | 0       | NE | 0       | NE |
| Spy49_1285c | -     | 1293594 | 1294337 | 74  | 0       | NE | 1       | E  | 0.00125 | NE |
| Spy49_1286c | -     | 1294337 | 1295140 | 247 | 0.00025 | NE | 0       | NE | 0.00025 | NE |
| Spy49_1287c | -     | 1295335 | 1296678 | 267 | 0.00025 | NE | 0       | NE | 0.00025 | NE |
| Spy49_1289c | mraY  | 1296836 | 1297846 | 447 | 0.9465  | U  | 1       | E  | 1       | E  |
| Spy49_1290c | ftsI  | 1297848 | 1300103 | 336 | 0.98825 | U  | 1       | E  | 1       | E  |
| Spy49_1291c | ftsL  | 1300107 | 1300430 | 751 | 0.99975 | E  | 1       | E  | 1       | E  |
| Spy49_1292c | mraW  | 1300435 | 1301385 | 107 | 0.58975 | U  | 1       | E  | 0.93775 | U  |
| Spy49_1293c | -     | 1301736 | 1301942 | 316 | 0.00025 | NE | 0       | NE | 0.00025 | NE |
| Spy49_1294c | proA  | 1301917 | 1303167 | 68  | 0       | NE | 0       | NE | 0       | NE |
| Spy49_1295c | proB  | 1303160 | 1303981 | 416 | 0       | NE | 0       | NE | 0       | NE |
| Spy49_1296c | -     | 1304045 | 1305673 | 273 | 0       | NE | 0       | NE | 0.00025 | NE |
| Spy49_1297c | -     | 1305678 | 1306412 | 542 | 0       | NE | 0       | NE | 0.00025 | NE |
| Spy49_1298c | -     | 1306446 | 1306712 | 244 | 0       | NE | 0       | NE | 0       | NE |
| Spy49_1299c | tkf   | 1306904 | 1308889 | 88  | 0       | NE | 0       | NE | 0.00025 | NE |

|             |       |         |         |     |         |    |         |    |         |    |
|-------------|-------|---------|---------|-----|---------|----|---------|----|---------|----|
| Spy49_1300c | tal   | 1309107 | 1309751 | 661 | 0.32125 | U  | 0.00725 | NE | 1       | E  |
| Spy49_1301c | -     | 1309877 | 1311376 | 214 | 0.00025 | NE | 0       | NE | 0       | NE |
| Spy49_1303c | npx   | 1311366 | 1312712 | 499 | 0       | NE | 0       | NE | 0       | NE |
| Spy49_1304c | glpF1 | 1312821 | 1313522 | 448 | 0       | NE | 0       | NE | 0.00025 | NE |
| Spy49_1305c | glpO  | 1313524 | 1315362 | 233 | 0       | NE | 0       | NE | 0.0045  | NE |
| Spy49_1306c | glpK  | 1315378 | 1316904 | 612 | 0       | NE | 0       | NE | 0.00025 | NE |
| Spy49_1307c | -     | 1317264 | 1317656 | 508 | 0.00125 | NE | 0       | NE | 0.00025 | NE |
| Spy49_1308c | -     | 1317784 | 1318041 | 130 | 0.00025 | NE | 0       | NE | 0       | NE |
| Spy49_1309c | glyS  | 1318195 | 1320234 | 85  | 0       | NE | 0       | NE | 0       | NE |
| Spy49_1310c | glyQ  | 1320606 | 1321523 | 679 | 1       | E  | 1       | E  | 1       | E  |
| Spy49_1311c | -     | 1321896 | 1322402 | 305 | 1       | E  | 1       | E  | 1       | E  |
| Spy49_1312c | -     | 1322561 | 1323400 | 168 | 0.00025 | NE | 0       | NE | 0       | NE |
| Spy49_1313c | nagA  | 1323522 | 1324670 | 279 | 0       | NE | 0       | NE | 0.00025 | NE |
| Spy49_1314c | -     | 1324787 | 1326418 | 382 | 0       | NE | 0       | NE | 0.00025 | NE |
| Spy49_1316c | -     | 1327469 | 1328311 | 543 | 0.00025 | NE | 0       | NE | 0.03675 | NE |
| Spy49_1318c | -     | 1328604 | 1329161 | 280 | 0       | NE | 0       | NE | 0       | NE |
| Spy49_1319  | -     | 1329198 | 1330022 | 185 | 0.00025 | NE | 0       | NE | 0.00025 | NE |
| Spy49_1320c | -     | 1330024 | 1330641 | 274 | 0       | NE | 0       | NE | 0       | NE |
| Spy49_1321c | lacD1 | 1330838 | 1331815 | 205 | 0       | NE | 0       | NE | 0.00025 | NE |
| Spy49_1322c | lacC1 | 1331897 | 1332160 | 325 | 0       | NE | 0       | NE | 0       | NE |
| Spy49_1323c | -     | 1331965 | 1332315 | 87  | 0       | NE | 0       | NE | 0       | NE |
| Spy49_1324c | lacB  | 1332325 | 1332840 | 116 | -1      | S  | -1      | S  | -1      | S  |
| Spy49_1325c | lacA  | 1332855 | 1333280 | 171 | 0       | NE | 0       | NE | 0       | NE |
| Spy49_1326c | -     | 1333538 | 1334989 | 141 | 0       | NE | 0       | NE | 0.00025 | NE |
| Spy49_1327c | -     | 1335015 | 1335320 | 483 | 0       | NE | 0       | NE | 0.00025 | NE |
| Spy49_1328c | -     | 1335313 | 1335786 | 101 | 0       | NE | 0       | NE | 0       | NE |
| Spy49_1329c | lacR1 | 1336023 | 1336793 | 157 | 0.00025 | NE | 0       | NE | 0       | NE |
| Spy49_1330  | copZ  | 1336997 | 1337200 | 256 | 0       | NE | 0       | NE | 0       | NE |
| Spy49_1331c | copA  | 1337214 | 1339445 | 67  | 0       | NE | 0       | NE | 0       | NE |
| Spy49_1332c | copY  | 1339445 | 1339882 | 743 | 0       | NE | 0       | NE | 0       | NE |
| Spy49_1334c | -     | 1340045 | 1341046 | 145 | 0       | NE | 0       | NE | 0       | NE |
| Spy49_1335  | rbfA  | 1341098 | 1341448 | 333 | 0       | NE | 0       | NE | 0       | NE |
| Spy49_1336c | infB  | 1341654 | 1344515 | 116 | 0.9855  | U  | 1       | E  | 0.98375 | U  |
| Spy49_1337c | -     | 1344535 | 1344837 | 953 | 0.99975 | E  | 1       | E  | 1       | E  |
| Spy49_1338c | -     | 1344830 | 1345126 | 100 | 0.00025 | NE | 0       | NE | 0.00025 | NE |
| Spy49_1339c | nusA  | 1345142 | 1346299 | 98  | 0.9875  | U  | 1       | E  | 0.9865  | U  |
| Spy49_1340c | -     | 1346474 | 1347010 | 385 | 1       | E  | 1       | E  | 1       | E  |
| Spy49_1341c | trmB  | 1347269 | 1347904 | 178 | 0.00025 | NE | 0       | NE | 0.00025 | NE |
| Spy49_1342c | -     | 1347904 | 1348695 | 211 | 0       | NE | 0       | NE | 0       | NE |
| Spy49_1343c | -     | 1348759 | 1349793 | 263 | 0.38775 | U  | 1       | E  | 1       | E  |
| Spy49_1344c | -     | 1349796 | 1350521 | 344 | 0       | NE | 0       | NE | 0.00025 | NE |
| Spy49_1345c | hit   | 1350593 | 1351012 | 241 | 0       | NE | 0       | NE | 0.0005  | NE |
| Spy49_1346  | -     | 1351009 | 1351365 | 139 | 0       | NE | 0       | NE | 0       | NE |
| Spy49_1347  | -     | 1351476 | 1352759 | 118 | 0       | NE | 0       | NE | 0       | NE |
| Spy49_1348c | -     | 1352768 | 1353292 | 427 | 0       | NE | 0       | NE | 0       | NE |
| Spy49_1349c | -     | 1353267 | 1353728 | 174 | 0       | NE | 0       | NE | 0       | NE |
| Spy49_1350c | -     | 1353882 | 1355342 | 153 | 0.00025 | NE | 1       | E  | 0.04125 | U  |
| Spy49_1351c | -     | 1355607 | 1356002 | 486 | 0.00025 | NE | 0       | NE | 0       | NE |
| Spy49_1352  | -     | 1356019 | 1356420 | 131 | 0       | NE | 0       | NE | 0       | NE |
| Spy49_1353  | manL  | 1356772 | 1357764 | 133 | 0.00025 | NE | 0       | NE | 0       | NE |
| Spy49_1354  | manM  | 1357853 | 1358662 | 330 | 0       | NE | 0       | NE | 0.00025 | NE |
| Spy49_1355  | manN  | 1358679 | 1359590 | 269 | 0       | NE | 0       | NE | 0       | NE |
| Spy49_1356  | -     | 1359704 | 1360063 | 303 | 0.00025 | NE | 0       | NE | 0       | NE |
| Spy49_1357  | serS  | 1360454 | 1361731 | 119 | 0.00025 | NE | 0       | NE | 0       | NE |
| Spy49_1358  | accA  | 1361964 | 1362734 | 425 | 0.99975 | E  | 1       | E  | 1       | E  |
| Spy49_1359c | accD  | 1362731 | 1363597 | 256 | 0.66025 | U  | 1       | E  | 0.97275 | U  |
| Spy49_1360c | accC  | 1363606 | 1364970 | 288 | 1       | E  | 1       | E  | 1       | E  |
| Spy49_1361c | fabZ  | 1365002 | 1365424 | 454 | 1       | E  | 1       | E  | 1       | E  |
| Spy49_1362c | accB  | 1365421 | 1365921 | 140 | 0.98325 | U  | 0.9985  | E  | 0.97425 | U  |
| Spy49_1363c | fabF  | 1365923 | 1367155 | 166 | 0.6345  | U  | 0.99975 | E  | 0.9875  | U  |
| Spy49_1364c | fabG  | 1367170 | 1367904 | 410 | 1       | E  | 1       | E  | 1       | E  |
| Spy49_1365c | fabD  | 1367894 | 1368832 | 244 | 0.95475 | U  | 1       | E  | 1       | E  |
| Spy49_1366c | fabK  | 1368857 | 1369828 | 312 | 1       | E  | 1       | E  | 0.9965  | E  |
| Spy49_1367c | acpP  | 1370029 | 1370253 | 323 | 0.952   | U  | 1       | E  | 1       | E  |
| Spy49_1368c | fabH  | 1370314 | 1371288 | 74  | 0.724   | U  | 1       | E  | 0.96375 | U  |
| Spy49_1369c | -     | 1371289 | 1371723 | 324 | 0.73025 | U  | 1       | E  | 0.996   | E  |
| Spy49_1370c | phaB  | 1371797 | 1372588 | 144 | 0       | NE | 0       | NE | 0       | NE |
| Spy49_1371c | dnaJ  | 1372809 | 1373945 | 263 | 0.99975 | E  | 1       | E  | 1       | E  |

|             |       |         |         |      |         |    |         |    |         |    |
|-------------|-------|---------|---------|------|---------|----|---------|----|---------|----|
| Spy49_1372c | -     | 1374008 | 1374217 | 378  | 0.99475 | E  | 1       | E  | 1       | E  |
| Spy49_1373  | dnaK  | 1374226 | 1376052 | 69   | 0.60925 | U  | 0       | NE | 0.00075 | NE |
| Spy49_1374c | grpE  | 1376233 | 1376805 | 608  | 1       | E  | 1       | E  | 1       | E  |
| Spy49_1375c | hrcA  | 1376808 | 1377851 | 190  | 0.92525 | U  | 1       | E  | 0.99075 | E  |
| Spy49_1376c | -     | 1377978 | 1378547 | 347  | 0.00025 | NE | 0       | NE | 0.00025 | NE |
| Spy49_1377c | -     | 1378544 | 1379287 | 189  | 0       | NE | 0       | NE | 0       | NE |
| Spy49_1378c | -     | 1379277 | 1379984 | 247  | 0       | NE | 0       | NE | 0       | NE |
| Spy49_1379c | -     | 1380376 | 1380615 | 235  | 0       | NE | 0       | NE | 0       | NE |
| Spy49_1380c | -     | 1380834 | 1381049 | 79   | 0       | NE | 0       | NE | 0       | NE |
| Spy49_1381c | gatB  | 1381046 | 1382485 | 71   | 0       | NE | 0       | NE | 0       | NE |
| Spy49_1382c | gatA  | 1382485 | 1383951 | 479  | 1       | E  | 1       | E  | 1       | E  |
| Spy49_1383c | gatC  | 1383951 | 1384253 | 488  | 1       | E  | 1       | E  | 1       | E  |
| Spy49_1384c | -     | 1384485 | 1384733 | 100  | 0.96525 | U  | 1       | E  | 0.955   | U  |
| Spy49_1385c | -     | 1385248 | 1385802 | 82   | 0       | NE | 0       | NE | 0       | NE |
| Spy49_1386c | codY  | 1385949 | 1386731 | 184  | 0.00025 | NE | 0       | NE | 0       | NE |
| Spy49_1387c | -     | 1386949 | 1388130 | 260  | 1       | E  | 1       | E  | 1       | E  |
| Spy49_1388c | -     | 1388395 | 1388847 | 393  | 0       | NE | 0       | NE | 0       | NE |
| Spy49_1389  | -     | 1388970 | 1390358 | 150  | 0       | NE | 0       | NE | 0       | NE |
| Spy49_1390c | asnB  | 1390430 | 1391395 | 462  | 0       | NE | 0       | NE | 0.00025 | NE |
| Spy49_1391  | -     | 1391744 | 1392448 | 321  | 0       | NE | 0       | NE | 0.00025 | NE |
| Spy49_1392c | -     | 1392461 | 1393363 | 234  | 0       | NE | 0       | NE | 0       | NE |
| Spy49_1393c | recG  | 1393655 | 1395670 | 300  | 0.00025 | NE | 0       | NE | 0.00025 | NE |
| Spy49_1394c | -     | 1396045 | 1397499 | 671  | 0       | NE | 0       | NE | 0.9995  | E  |
| Spy49_1395c | -     | 1397436 | 1398116 | 484  | 0       | NE | 0       | NE | 0       | NE |
| Spy49_1396c | -     | 1398113 | 1398706 | 226  | 0.00025 | NE | 0       | NE | 0.00025 | NE |
| Spy49_1397c | cycC  | 1398703 | 1400373 | 197  | 0       | NE | 0       | NE | 0       | NE |
| Spy49_1398c | cycD  | 1400366 | 1402129 | 556  | 0.00025 | NE | 0       | NE | 0       | NE |
| Spy49_1400c | fhuC2 | 1402126 | 1402962 | 587  | 0.00025 | NE | 0       | NE | 0       | NE |
| Spy49_1401c | fhuB2 | 1402959 | 1403981 | 278  | 0       | NE | 0       | NE | 0       | NE |
| Spy49_1402c | fhuD2 | 1403983 | 1405728 | 340  | 0       | NE | 0       | NE | 0.00125 | NE |
| Spy49_1403c | -     | 1405925 | 1409752 | 581  | 0       | NE | 0       | NE | 0.00025 | NE |
| Spy49_1405c | isp2  | 1410242 | 1411753 | 1275 | 0.00025 | NE | 0       | NE | 0.00025 | NE |
| Spy49_1407c | air   | 1411840 | 1412940 | 503  | 0.00025 | NE | 0       | NE | 0       | NE |
| Spy49_1408c | acpS  | 1412937 | 1413293 | 366  | 1       | E  | 1       | E  | 1       | E  |
| Spy49_1409c | secA  | 1413409 | 1415928 | 118  | 0.9995  | E  | 1       | E  | 0.9975  | E  |
| Spy49_1410c | pmi   | 1417389 | 1418342 | 839  | 1       | E  | 1       | E  | 1       | E  |
| Spy49_1412c | scrK  | 1418389 | 1419393 | 317  | 0       | NE | 0       | NE | 0       | NE |
| Spy49_1413c | endoS | 1419562 | 1422093 | 334  | 0       | NE | 0       | NE | 0       | NE |
| Spy49_1414c | scrA  | 1422324 | 1424207 | 843  | 0       | NE | 0       | NE | 0       | NE |
| Spy49_1415c | scrB  | 1424449 | 1425888 | 627  | 0       | NE | 0       | NE | 0       | NE |
| Spy49_1416  | scrR  | 1425893 | 1426858 | 479  | 0       | NE | 0       | NE | 0.12925 | U  |
| Spy49_1417  | nusB  | 1426999 | 1427451 | 321  | 0.00025 | NE | 0       | NE | 0.00025 | NE |
| Spy49_1418c | -     | 1427444 | 1427833 | 150  | 0       | NE | 0       | NE | 0       | NE |
| Spy49_1419c | efp   | 1427879 | 1428436 | 129  | 0.00025 | NE | 0       | NE | 0.0005  | NE |
| Spy49_1420c | comEB | 1428532 | 1428993 | 185  | 0       | NE | 0       | NE | 0       | NE |
| Spy49_1421c | pepP  | 1429028 | 1430101 | 153  | 0       | NE | 0       | NE | 0.00025 | NE |
| Spy49_1422c | uvrA  | 1430216 | 1433074 | 357  | 0       | NE | 0       | NE | 0       | NE |
| Spy49_1423c | -     | 1433247 | 1434191 | 952  | 0       | NE | 0       | NE | 0       | NE |
| Spy49_1424  | -     | 1434323 | 1434979 | 314  | 0.212   | U  | 0.00025 | NE | 0.99825 | E  |
| Spy49_1425  | rpsR  | 1435112 | 1435351 | 218  | 0       | NE | 0       | NE | 0       | NE |
| Spy49_1426c | ssb2  | 1435516 | 1436007 | 79   | 0.87025 | U  | 0.9515  | U  | 0.02275 | NE |
| Spy49_1427c | rpsF  | 1436029 | 1436319 | 163  | 0.00175 | NE | 0.9875  | U  | 0.999   | E  |
| Spy49_1428c | -     | 1436492 | 1436785 | 96   | 0.97675 | U  | 0       | NE | 0.971   | U  |
| Spy49_1429c | mutY  | 1436953 | 1438107 | 97   | 0       | NE | 0       | NE | 0.00025 | NE |
| Spy49_1430  | -     | 1438284 | 1438871 | 384  | 0       | NE | 0       | NE | 0       | NE |
| Spy49_1431  | trx2  | 1438923 | 1439237 | 195  | 0.00025 | NE | 0       | NE | 0.00025 | NE |
| Spy49_1432c | -     | 1439318 | 1439713 | 104  | 0       | NE | 0       | NE | 0.00025 | NE |
| Spy49_1433c | mutS2 | 1439822 | 1442161 | 131  | 0       | NE | 0       | NE | 0       | NE |
| Spy49_1434c | -     | 1442310 | 1442855 | 779  | 0.00025 | NE | 0       | NE | 0       | NE |
| Spy49_1435c | -     | 1442858 | 1443166 | 181  | 0.00025 | NE | 0       | NE | 0       | NE |
| Spy49_1436c | -     | 1443323 | 1444225 | 102  | 0       | NE | 0       | NE | 0       | NE |
| Spy49_1437  | spi   | 1444236 | 1444829 | 300  | 0.9885  | U  | 1       | E  | 1       | E  |
| Spy49_1438  | recD  | 1444887 | 1447340 | 197  | 0.009   | NE | 1       | E  | 0.99975 | E  |
| Spy49_1439  | -     | 1447431 | 1447913 | 817  | 0       | NE | 0       | NE | 0.0005  | NE |
| Spy49_1440  | dinP  | 1448006 | 1449100 | 160  | 0       | NE | 0       | NE | 0.00025 | NE |
| Spy49_1441c | pfl   | 1449309 | 1451636 | 364  | 0.06525 | U  | 0       | NE | 0.0685  | U  |
| Spy49_1442  | -     | 1451724 | 1452113 | 775  | 0.00025 | NE | 0       | NE | 0.06875 | U  |
| Spy49_1443c | cppA  | 1452098 | 1452850 | 129  | 0       | NE | 0       | NE | 0       | NE |

|             |       |         |         |      |         |    |    |    |         |    |
|-------------|-------|---------|---------|------|---------|----|----|----|---------|----|
| Spy49_1444c | -     | 1453112 | 1454044 | 250  | 0       | NE | 0  | NE | 0       | NE |
| Spy49_1445  | glpF2 | 1454380 | 1455327 | 310  | 0       | NE | 0  | NE | 0       | NE |
| Spy49_1447c | norA  | 1455730 | 1456926 | 315  | 0       | NE | 0  | NE | 0.963   | U  |
| Spy49_1449c | -     | 1457032 | 1457751 | 398  | 0.00025 | NE | 0  | NE | 0       | NE |
| Spy49_1450  | pepXP | 1457773 | 1460055 | 239  | 0.00025 | NE | 0  | NE | 0       | NE |
| Spy49_1451  | -     | 1460135 | 1460356 | 760  | 0.00025 | NE | 0  | NE | 0.00025 | NE |
| Spy49_1452c | -     | 1460526 | 1460900 | 73   | 0       | NE | 0  | NE | 0       | NE |
| Spy49_1453  | -     | 1461245 | 1461424 | 124  | 0       | NE | 0  | NE | 0       | NE |
| Spy49_1454c | spd3  | 1461662 | 1462462 | 59   | 0.00925 | NE | 0  | NE | 0       | NE |
| Spy49_1455  | -     | 1462842 | 1463168 | 266  | 0       | NE | 0  | NE | 0       | NE |
| Spy49_1456  | -     | 1463218 | 1464084 | 108  | 0       | NE | 0  | NE | 0       | NE |
| Spy49_1457c | -     | 1464072 | 1464596 | 288  | 0       | NE | 0  | NE | 0       | NE |
| Spy49_1458c | -     | 1464736 | 1465944 | 174  | 0       | NE | 0  | NE | 0       | NE |
| Spy49_1459c | -     | 1466060 | 1466287 | 402  | 0       | NE | 0  | NE | 0       | NE |
| Spy49_1460c | -     | 1466284 | 1466559 | 75   | 0       | NE | 0  | NE | 0       | NE |
| Spy49_1461c | -     | 1466569 | 1467186 | 91   | 0       | NE | 0  | NE | 0       | NE |
| Spy49_1462c | -     | 1467189 | 1467350 | 205  | 0       | NE | 0  | NE | 0       | NE |
| Spy49_1463c | -     | 1467364 | 1469274 | 53   | -1      | S  | -1 | S  | -1      | S  |
| Spy49_1464c | -     | 1469290 | 1470294 | 636  | 0.00025 | NE | 0  | NE | 0.00025 | NE |
| Spy49_1465c | -     | 1470291 | 1472342 | 334  | 0.00025 | NE | 0  | NE | 0.8635  | U  |
| Spy49_1466c | -     | 1472339 | 1473118 | 683  | 0.00075 | NE | 0  | NE | 0.90375 | U  |
| Spy49_1467c | -     | 1473151 | 1476786 | 259  | 0.00025 | NE | 0  | NE | 0.06925 | U  |
| Spy49_1468c | -     | 1476801 | 1477130 | 1211 | 0       | NE | 0  | NE | 0.00225 | NE |
| Spy49_1470c | -     | 1477172 | 1477531 | 109  | 0       | NE | 0  | NE | 0.0005  | NE |
| Spy49_1471c | -     | 1477584 | 1478237 | 119  | 0.00025 | NE | 0  | NE | 0.00025 | NE |
| Spy49_1472c | -     | 1478247 | 1478636 | 217  | 0       | NE | 0  | NE | 0.00025 | NE |
| Spy49_1474c | -     | 1478633 | 1478989 | 129  | 0       | NE | 0  | NE | 0.00025 | NE |
| Spy49_1475c | -     | 1478979 | 1479287 | 118  | 0       | NE | 0  | NE | 0.00025 | NE |
| Spy49_1476c | -     | 1479284 | 1479637 | 102  | 0       | NE | 0  | NE | 0       | NE |
| Spy49_1477c | -     | 1479651 | 1479893 | 117  | 0.00025 | NE | 0  | NE | 0       | NE |
| Spy49_1478c | -     | 1479903 | 1480985 | 80   | 0       | NE | 0  | NE | 0.007   | NE |
| Spy49_1479c | -     | 1480988 | 1481368 | 360  | 0       | NE | 0  | NE | 0       | NE |
| Spy49_1480c | -     | 1481378 | 1481911 | 126  | 0.00025 | NE | 0  | NE | 0.00025 | NE |
| Spy49_1481c | -     | 1482055 | 1482321 | 177  | 0       | NE | 0  | NE | 0       | NE |
| Spy49_1482c | -     | 1482324 | 1482638 | 88   | 0       | NE | 0  | NE | 0       | NE |
| Spy49_1483c | -     | 1482708 | 1482893 | 104  | 0       | NE | 0  | NE | 0       | NE |
| Spy49_1484c | -     | 1482897 | 1484459 | 61   | 0       | NE | 0  | NE | 0       | NE |
| Spy49_1485c | -     | 1484440 | 1485942 | 520  | 0       | NE | 0  | NE | 0       | NE |
| Spy49_1486c | -     | 1485954 | 1487243 | 500  | 0       | NE | 0  | NE | 0       | NE |
| Spy49_1487c | -     | 1487221 | 1487703 | 429  | 0       | NE | 0  | NE | 0       | NE |
| Spy49_1488c | -     | 1488535 | 1488975 | 160  | 0.00025 | NE | 0  | NE | 0       | NE |
| Spy49_1489c | -     | 1489415 | 1489936 | 146  | 0       | NE | 0  | NE | 0       | NE |
| Spy49_1491c | -     | 1489933 | 1490226 | 173  | 0       | NE | 0  | NE | 0.00025 | NE |
| Spy49_1492c | -     | 1490223 | 1490408 | 97   | 0       | NE | 0  | NE | 0.0005  | NE |
| Spy49_1493c | -     | 1490506 | 1490991 | 61   | 0.03475 | NE | 0  | NE | 0       | NE |
| Spy49_1494c | -     | 1491276 | 1491680 | 161  | 0       | NE | 0  | NE | 0.952   | U  |
| Spy49_1496c | -     | 1491664 | 1491954 | 134  | 0       | NE | 0  | NE | 0       | NE |
| Spy49_1497c | -     | 1492193 | 1492549 | 96   | 0.52275 | U  | 0  | NE | 0.0015  | NE |
| Spy49_1498c | -     | 1492625 | 1492987 | 118  | 0       | NE | 0  | NE | 0.00975 | NE |
| Spy49_1499c | -     | 1493196 | 1493621 | 120  | 0       | NE | 0  | NE | 0.00025 | NE |
| Spy49_1500c | -     | 1493614 | 1494288 | 141  | 0       | NE | 0  | NE | 0.09725 | U  |
| Spy49_1501c | -     | 1494289 | 1494435 | 224  | 0       | NE | 0  | NE | 0.00025 | NE |
| Spy49_1502c | -     | 1494793 | 1495047 | 48   | -1      | S  | -1 | S  | -1      | S  |
| Spy49_1504c | -     | 1495034 | 1495381 | 84   | 0       | NE | 0  | NE | 0.00025 | NE |
| Spy49_1505c | -     | 1495522 | 1497093 | 115  | 0       | NE | 0  | NE | 0.10075 | U  |
| Spy49_1506c | -     | 1497209 | 1497652 | 523  | 0.00025 | NE | 0  | NE | 0.02375 | NE |
| Spy49_1507c | -     | 1498078 | 1498350 | 147  | 0       | NE | 0  | NE | 0.00025 | NE |
| Spy49_1509c | -     | 1498523 | 1498702 | 90   | 0.00025 | NE | 0  | NE | 0.0005  | NE |
| Spy49_1510c | -     | 1498833 | 1498967 | 59   | 0.9765  | U  | 1  | E  | 0.97825 | U  |
| Spy49_1511c | -     | 1499249 | 1499608 | 44   | -1      | S  | -1 | S  | -1      | S  |
| Spy49_1512c | -     | 1499682 | 1499939 | 119  | 0.00025 | NE | 0  | NE | 0       | NE |
| Spy49_1513c | -     | 1500142 | 1500483 | 85   | 0       | NE | 0  | NE | 0       | NE |
| Spy49_1514c | -     | 1500755 | 1500904 | 113  | 0.00025 | NE | 0  | NE | 0.00025 | NE |
| Spy49_1516c | -     | 1500936 | 1501664 | 49   | -1      | S  | -1 | S  | -1      | S  |
| Spy49_1517c | -     | 1501697 | 1501885 | 242  | 0       | NE | 0  | NE | 0.00025 | NE |
| Spy49_1518c | -     | 1502073 | 1502255 | 62   | 0.00025 | NE | 0  | NE | 0.00225 | NE |
| Spy49_1520c | -     | 1502532 | 1503293 | 60   | -1      | S  | -1 | S  | -1      | S  |
| Spy49_1521c | -     | 1503460 | 1503732 | 253  | 0.00025 | NE | 0  | NE | 0       | NE |

|             |       |         |         |     |         |    |         |    |         |    |
|-------------|-------|---------|---------|-----|---------|----|---------|----|---------|----|
| Spy49_1522  | -     | 1504006 | 1504473 | 90  | 0.99225 | U  | 0       | NE | 0.99525 | E  |
| Spy49_1525  | -     | 1504589 | 1505368 | 155 | 0.00025 | NE | 0       | NE | 0       | NE |
| Spy49_1526  | -     | 1505502 | 1505660 | 259 | 0.00025 | NE | 0       | NE | 0.00025 | NE |
| Spy49_1528c | -     | 1506024 | 1506782 | 52  | -1      | S  | -1      | S  | -1      | S  |
| Spy49_1529  | -     | 1506855 | 1507277 | 252 | 0.00025 | NE | 1       | E  | 0.93025 | U  |
| Spy49_1530  | -     | 1507398 | 1508534 | 140 | 0       | NE | 0       | NE | 0       | NE |
| Spy49_1531  | -     | 1508573 | 1508893 | 378 | 0       | NE | 0       | NE | 0       | NE |
| Spy49_1532  | -     | 1508950 | 1509687 | 106 | 0       | NE | 0       | NE | 0       | NE |
| Spy49_1533c | dnaQ  | 1509840 | 1510427 | 245 | 0       | NE | 0       | NE | 0.00025 | NE |
| Spy49_1534c | -     | 1510476 | 1511057 | 195 | 0.00025 | NE | 0       | NE | 0.98775 | U  |
| Spy49_1535c | -     | 1511183 | 1511698 | 193 | 0.0005  | NE | 0       | NE | 0.836   | U  |
| Spy49_1536c | -     | 1511601 | 1512305 | 171 | 0       | NE | 0       | NE | 0       | NE |
| Spy49_1537c | -     | 1512526 | 1513695 | 234 | 0       | NE | 0       | NE | 0.00025 | NE |
| Spy49_1538  | deoC  | 1513790 | 1514461 | 389 | 0.00025 | NE | 0       | NE | 0.00025 | NE |
| Spy49_1540c | nupC  | 1514491 | 1515693 | 223 | 0       | NE | 0       | NE | 0       | NE |
| Spy49_1541c | udp   | 1515714 | 1516493 | 400 | 0       | NE | 0       | NE | 0.00025 | NE |
| Spy49_1542c | -     | 1516733 | 1517491 | 259 | 0.00025 | NE | 0       | NE | 0       | NE |
| Spy49_1543  | rpsN  | 1517700 | 1517969 | 252 | 0       | NE | 0       | NE | 0       | NE |
| Spy49_1544  | gcp   | 1518141 | 1519169 | 89  | 0       | NE | 0       | NE | 0       | NE |
| Spy49_1545c | -     | 1519159 | 1519614 | 342 | 0.4205  | U  | 1       | E  | 0.98275 | U  |
| Spy49_1546c | -     | 1519586 | 1520284 | 151 | 0       | NE | 0       | NE | 0       | NE |
| Spy49_1547c | -     | 1520568 | 1520798 | 232 | 0.29175 | U  | 1       | E  | 1       | E  |
| Spy49_1548  | -     | 1520800 | 1522482 | 76  | 0       | NE | 1       | E  | 0.00025 | NE |
| Spy49_1549  | glnA  | 1522710 | 1524056 | 560 | 1       | E  | 1       | E  | 1       | E  |
| Spy49_1550c | glnR  | 1524094 | 1524465 | 448 | 0.0005  | NE | 0       | NE | 0.00325 | NE |
| Spy49_1551c | -     | 1524532 | 1525083 | 123 | 0       | NE | 0       | NE | 0       | NE |
| Spy49_1552c | pgk   | 1525345 | 1526541 | 183 | 0       | NE | 0       | NE | 0.00025 | NE |
| Spy49_1553c | lppC  | 1526726 | 1527580 | 398 | 0.9995  | E  | 1       | E  | 0.705   | U  |
| Spy49_1554c | -     | 1527820 | 1528701 | 284 | 0       | NE | 0       | NE | 0       | NE |
| Spy49_1555c | -     | 1528938 | 1530602 | 293 | 0       | NE | 0       | NE | 0       | NE |
| Spy49_1556c | asp   | 1530602 | 1530967 | 554 | 0.84    | U  | 1       | E  | 1       | E  |
| Spy49_1557c | rpmB  | 1531119 | 1531307 | 121 | 0.00025 | NE | 0.00075 | NE | 0.9865  | U  |
| Spy49_1558c | fba   | 1531689 | 1532570 | 62  | 0       | NE | 0       | NE | 0       | NE |
| Spy49_1559c | -     | 1532916 | 1533842 | 293 | 1       | E  | 1       | E  | 1       | E  |
| Spy49_1560c | pyrG  | 1534010 | 1535614 | 308 | 0.00025 | NE | 0       | NE | 0       | NE |
| Spy49_1561c | rpoE  | 1535871 | 1536479 | 534 | 0.00025 | NE | 0       | NE | 0.00025 | NE |
| Spy49_1562c | tig   | 1536663 | 1537946 | 202 | 0       | NE | 0       | NE | 0       | NE |
| Spy49_1563c | -     | 1538267 | 1539112 | 427 | 0.03825 | NE | 0       | NE | 0       | NE |
| Spy49_1564  | -     | 1539177 | 1539737 | 281 | 0.00025 | NE | 0       | NE | 0.00125 | NE |
| Spy49_1565c | -     | 1539751 | 1540221 | 186 | 0       | NE | 0       | NE | 0       | NE |
| Spy49_1566c | thiD  | 1540211 | 1540975 | 156 | 0       | NE | 0       | NE | 0       | NE |
| Spy49_1567c | truA  | 1540965 | 1541714 | 254 | 0       | NE | 0       | NE | 0.00025 | NE |
| Spy49_1568c | comX2 | 1542131 | 1542388 | 249 | 0       | NE | 0       | NE | 0       | NE |
| Spy49_1569c | -     | 1548174 | 1549316 | 85  | 0       | NE | 0       | NE | 0       | NE |
| Spy49_1571c | hsdR  | 1549597 | 1552575 | 380 | 0       | NE | 0       | NE | 0       | NE |
| Spy49_1572  | hsdS  | 1552588 | 1553730 | 992 | 0       | NE | 0       | NE | 0       | NE |
| Spy49_1573  | hsdM  | 1553743 | 1555323 | 380 | 0       | NE | 0       | NE | 0.00025 | NE |
| Spy49_1574  | -     | 1555533 | 1555733 | 526 | 0.00025 | NE | 0       | NE | 0       | NE |
| Spy49_1575c | salR  | 1555876 | 1556481 | 66  | 0       | NE | 0       | NE | 0       | NE |
| Spy49_1576c | salK  | 1556462 | 1557883 | 201 | 0       | NE | 0       | NE | 0       | NE |
| Spy49_1577c | salY  | 1558064 | 1559971 | 473 | 0.00025 | NE | 0       | NE | 0       | NE |
| Spy49_1578c | salX  | 1559973 | 1560710 | 635 | 0       | NE | 0       | NE | 0       | NE |
| Spy49_1579c | salT  | 1560707 | 1561168 | 245 | 0       | NE | 0       | NE | 0.00025 | NE |
| Spy49_1580c | salB  | 1561242 | 1562867 | 153 | 0       | NE | 0       | NE | 0       | NE |
| Spy49_1582c | salA  | 1562951 | 1563097 | 541 | 0       | NE | 0       | NE | 0.00025 | NE |
| Spy49_1583c | lacG  | 1563609 | 1565042 | 48  | -1      | S  | -1      | S  | -1      | S  |
| Spy49_1584c | lacE  | 1565103 | 1566800 | 477 | 0       | NE | 0       | NE | 0       | NE |
| Spy49_1585c | lacF  | 1566800 | 1567117 | 565 | 0       | NE | 0       | NE | 0       | NE |
| Spy49_1586c | lacD2 | 1567141 | 1568124 | 105 | 0       | NE | 0       | NE | 0       | NE |
| Spy49_1587c | lacC2 | 1568128 | 1569057 | 327 | 0       | NE | 0       | NE | 0       | NE |
| Spy49_1588c | lacB2 | 1569103 | 1569618 | 309 | 0       | NE | 0       | NE | 0       | NE |
| Spy49_1589c | lacA2 | 1569653 | 1570081 | 171 | 0       | NE | 0       | NE | 0.00075 | NE |
| Spy49_1590c | lacR2 | 1570527 | 1571300 | 142 | 0       | NE | 0       | NE | 0       | NE |
| Spy49_1591  | -     | 1572028 | 1572249 | 257 | 0       | NE | 0       | NE | 0       | NE |
| Spy49_1592  | -     | 1572239 | 1572574 | 73  | 0       | NE | 0       | NE | 0       | NE |
| Spy49_1593  | -     | 1573340 | 1573660 | 111 | 0       | NE | 0       | NE | 0       | NE |
| Spy49_1594  | rpsI  | 1573828 | 1574220 | 106 | 0       | NE | 0       | NE | 0       | NE |
| Spy49_1595c | rplM  | 1574241 | 1574687 | 130 | 0.063   | U  | 0.99725 | E  | 0.99175 | E  |

|             |       |         |         |      |         |    |         |    |         |    |
|-------------|-------|---------|---------|------|---------|----|---------|----|---------|----|
| Spy49_1596c | -     | 1574905 | 1575111 | 148  | 0.89875 | U  | 0.99975 | E  | 0.913   | U  |
| Spy49_1597c | -     | 1575108 | 1575806 | 68   | 0.01    | NE | 0.00025 | NE | 0.05825 | U  |
| Spy49_1598c | -     | 1575942 | 1576817 | 232  | 0       | NE | 0       | NE | 0.00025 | NE |
| Spy49_1599c | -     | 1576898 | 1577380 | 291  | 0       | NE | 0       | NE | 0.3945  | U  |
| Spy49_1600c | -     | 1577419 | 1578165 | 160  | 0       | NE | 0       | NE | 0       | NE |
| Spy49_1601c | -     | 1578212 | 1579009 | 248  | 0       | NE | 0       | NE | 0       | NE |
| Spy49_1602c | -     | 1579205 | 1579618 | 265  | 0       | NE | 0       | NE | 0       | NE |
| Spy49_1603c | cysS  | 1579611 | 1580954 | 137  | 0       | NE | 0       | NE | 0       | NE |
| Spy49_1604c | -     | 1580982 | 1581212 | 447  | 1       | E  | 1       | E  | 1       | E  |
| Spy49_1605c | cysE  | 1581691 | 1582272 | 76   | 0       | NE | 0       | NE | 0       | NE |
| Spy49_1606c | -     | 1582281 | 1583033 | 193  | 0.46375 | U  | 0       | NE | 0       | NE |
| Spy49_1607c | pnp   | 1583026 | 1585158 | 250  | 0.00025 | NE | 0       | NE | 0       | NE |
| Spy49_1608c | -     | 1585438 | 1586166 | 710  | 0       | NE | 0       | NE | 0.02175 | NE |
| Spy49_1609c | ulaA  | 1586179 | 1587558 | 242  | 0       | NE | 0       | NE | 0       | NE |
| Spy49_1610c | -     | 1587585 | 1587869 | 459  | 0       | NE | 0       | NE | 0.00025 | NE |
| Spy49_1611c | -     | 1587862 | 1589922 | 94   | 0       | NE | 0       | NE | 0.00025 | NE |
| Spy49_1612c | rpsO  | 1590275 | 1590544 | 686  | 0       | NE | 0       | NE | 0       | NE |
| Spy49_1613c | -     | 1590720 | 1590920 | 89   | 0       | NE | 0       | NE | 0.96975 | U  |
| Spy49_1614c | def   | 1591319 | 1591933 | 66   | 0       | NE | 0       | NE | 0       | NE |
| Spy49_1615  | -     | 1591967 | 1592509 | 204  | 0       | NE | 1       | E  | 0.985   | U  |
| Spy49_1616c | -     | 1592640 | 1593068 | 180  | 0       | NE | 0       | NE | 0       | NE |
| Spy49_1617c | polC  | 1593178 | 1597575 | 142  | 0       | NE | 0       | NE | 0       | NE |
| Spy49_1618c | proS  | 1597830 | 1599686 | 1465 | 0.99975 | E  | 1       | E  | 1       | E  |
| Spy49_1619c | eep   | 1599884 | 1601143 | 618  | 0.9995  | E  | 1       | E  | 1       | E  |
| Spy49_1620c | cdsA  | 1601216 | 1602010 | 419  | 0       | NE | 0       | NE | 0.00025 | NE |
| Spy49_1621c | uppS  | 1602023 | 1602772 | 264  | 0.84425 | U  | 1       | E  | 1       | E  |
| Spy49_1622c | yajC  | 1602991 | 1603356 | 249  | 0.95275 | U  | 1       | E  | 1       | E  |
| Spy49_1624c | -     | 1603472 | 1603819 | 121  | 0       | NE | 0       | NE | 0       | NE |
| Spy49_1625c | pulA  | 1603961 | 1607365 | 115  | 0       | NE | 0       | NE | 0       | NE |
| Spy49_1626c | dexB  | 1607656 | 1609269 | 1134 | 0       | NE | 0       | NE | 0       | NE |
| Spy49_1627c | msmK  | 1609398 | 1610531 | 537  | 0       | NE | 0       | NE | 0       | NE |
| Spy49_1628c | lrp   | 1610829 | 1611722 | 377  | 0.00025 | NE | 0       | NE | 0       | NE |
| Spy49_1629c | ska   | 1612017 | 1613339 | 297  | 0       | NE | 0       | NE | 0       | NE |
| Spy49_1630  | dtd   | 1613437 | 1613880 | 440  | 0       | NE | 0       | NE | 0       | NE |
| Spy49_1631c | relA  | 1613895 | 1616114 | 147  | 0       | NE | 0       | NE | 0       | NE |
| Spy49_1632c | sclA  | 1616358 | 1617626 | 739  | 0.18525 | U  | 0       | NE | 1       | E  |
| Spy49_1633c | nrpI2 | 1618008 | 1618490 | 422  | 0.00025 | NE | 0       | NE | 0.00025 | NE |
| Spy49_1634  | -     | 1618883 | 1619701 | 160  | 0       | NE | 0       | NE | 0       | NE |
| Spy49_1635c | -     | 1619784 | 1621970 | 272  | 0       | NE | 0       | NE | 0       | NE |
| Spy49_1636c | -     | 1622326 | 1623075 | 728  | 0.00025 | NE | 0       | NE | 0.0165  | NE |
| Spy49_1637c | prmA  | 1623075 | 1624028 | 249  | 0       | NE | 0       | NE | 0.004   | NE |
| Spy49_1638c | nudC  | 1624045 | 1625127 | 317  | 0.00025 | NE | 0       | NE | 0.00025 | NE |
| Spy49_1639c | nudB  | 1625304 | 1625660 | 360  | 0.00025 | NE | 0       | NE | 0.00025 | NE |
| Spy49_1640c | nudA  | 1625688 | 1626005 | 118  | 0       | NE | 0       | NE | 0       | NE |
| Spy49_1641c | -     | 1626019 | 1626489 | 105  | 0       | NE | 0       | NE | 0       | NE |
| Spy49_1642c | -     | 1626554 | 1626673 | 156  | 0       | NE | 0       | NE | 0       | NE |
| Spy49_1643c | -     | 1626954 | 1627532 | 39   | -1      | S  | -1      | S  | -1      | S  |
| Spy49_1644c | -     | 1627693 | 1627983 | 192  | 0.00025 | NE | 0       | NE | 0       | NE |
| Spy49_1646c | -     | 1628038 | 1628844 | 96   | 0       | NE | 0       | NE | 0       | NE |
| Spy49_1647c | -     | 1629499 | 1629813 | 268  | 0       | NE | 0       | NE | 0       | NE |
| Spy49_1649c | -     | 1630202 | 1630438 | 104  | 0       | NE | 0       | NE | 0       | NE |
| Spy49_1651  | -     | 1630510 | 1630704 | 78   | 0       | NE | 0       | NE | 0       | NE |
| Spy49_1652  | papB  | 1630830 | 1632587 | 64   | 0.5285  | U  | 0       | NE | 0       | NE |
| Spy49_1653  | trpG  | 1632620 | 1633186 | 585  | 0       | NE | 0       | NE | 0       | NE |
| Spy49_1654  | -     | 1633219 | 1634487 | 188  | 0       | NE | 0       | NE | 0       | NE |
| Spy49_1655  | pai1  | 1634985 | 1635425 | 422  | 0       | NE | 0       | NE | 0       | NE |
| Spy49_1656  | -     | 1635460 | 1635966 | 146  | 0       | NE | 0       | NE | 0.00025 | NE |
| Spy49_1657  | -     | 1636090 | 1636425 | 168  | 0       | NE | 0       | NE | 0       | NE |
| Spy49_1658c | -     | 1636435 | 1637079 | 111  | 0.00025 | NE | 0       | NE | 0.00025 | NE |
| Spy49_1659c | dppA  | 1638159 | 1639649 | 214  | 0       | NE | 0       | NE | 0       | NE |
| Spy49_1660  | dppB  | 1639762 | 1640739 | 496  | 0       | NE | 0       | NE | 0       | NE |
| Spy49_1661  | dppC  | 1640736 | 1641557 | 325  | 0       | NE | 0       | NE | 0.0005  | NE |
| Spy49_1662  | dppD  | 1641569 | 1642372 | 273  | 0       | NE | 0       | NE | 0.00025 | NE |
| Spy49_1663  | dppF  | 1642356 | 1642982 | 267  | 0       | NE | 0       | NE | 0       | NE |
| Spy49_1664  | -     | 1643064 | 1643264 | 208  | 0       | NE | 0       | NE | 0       | NE |
| Spy49_1665c | -     | 1643433 | 1645904 | 66   | 0       | NE | 0       | NE | 0       | NE |
| Spy49_1666c | lmb   | 1645917 | 1646837 | 823  | 0       | NE | 0       | NE | 0.00025 | NE |
| Spy49_1667c | -     | 1647073 | 1648410 | 306  | 0       | NE | 0       | NE | 0.00025 | NE |

|             |        |         |         |      |         |    |    |    |         |    |
|-------------|--------|---------|---------|------|---------|----|----|----|---------|----|
| Spy49_1668c | scpA   | 1648661 | 1652050 | 445  | 0       | NE | 0  | NE | 0.00025 | NE |
| Spy49_1669c | ennX   | 1652385 | 1653491 | 1129 | 0       | NE | 0  | NE | 0.00025 | NE |
| Spy49_1670c | emm49  | 1653701 | 1654858 | 368  | 0       | NE | 0  | NE | 0       | NE |
| Spy49_1671c | -      | 1655083 | 1656330 | 385  | 0.00025 | NE | 0  | NE | 0.00025 | NE |
| Spy49_1672c | mga    | 1656520 | 1658121 | 415  | 0       | NE | 0  | NE | 0       | NE |
| Spy49_1673c | -      | 1658797 | 1659048 | 533  | 0       | NE | 0  | NE | 0       | NE |
| Spy49_1674c | isp1   | 1659126 | 1660754 | 83   | 0       | NE | 0  | NE | 0       | NE |
| Spy49_1675c | -      | 1660856 | 1662244 | 542  | 0       | NE | 0  | NE | 0       | NE |
| Spy49_1676c | -      | 1662241 | 1662894 | 462  | 0       | NE | 0  | NE | 0.00025 | NE |
| Spy49_1677c | -      | 1662988 | 1664205 | 217  | 0       | NE | 0  | NE | 0       | NE |
| Spy49_1678c | -      | 1664218 | 1664892 | 405  | 0       | NE | 0  | NE | 0       | NE |
| Spy49_1679c | -      | 1664879 | 1666147 | 224  | 0.00025 | NE | 0  | NE | 0       | NE |
| Spy49_1680c | -      | 1666571 | 1666975 | 422  | 0       | NE | 0  | NE | 0       | NE |
| Spy49_1681c | -      | 1667002 | 1667298 | 134  | 0.00025 | NE | 0  | NE | 0.00025 | NE |
| Spy49_1682c | sfbX49 | 1667440 | 1669395 | 98   | 0       | NE | 0  | NE | 0       | NE |
| Spy49_1683c | sof    | 1669575 | 1672655 | 651  | 0       | NE | 0  | NE | 0.00025 | NE |
| Spy49_1684c | -      | 1673078 | 1673314 | 1026 | 0.00025 | NE | 0  | NE | 0.00175 | NE |
| Spy49_1686  | ropA   | 1673590 | 1674540 | 78   | 0       | NE | 0  | NE | 0.0005  | NE |
| Spy49_1687c | -      | 1674572 | 1674889 | 316  | 0       | NE | 0  | NE | 0.4775  | U  |
| Spy49_1688c | -      | 1674997 | 1675302 | 105  | 0       | NE | 0  | NE | 0       | NE |
| Spy49_1689c | speB   | 1675304 | 1676500 | 101  | 0       | NE | 0  | NE | 0.996   | E  |
| Spy49_1690c | ropB   | 1677441 | 1678283 | 398  | 0       | NE | 0  | NE | 0       | NE |
| Spy49_1691  | mf1    | 1678512 | 1679342 | 280  | 0       | NE | 0  | NE | 0       | NE |
| Spy49_1692c | -      | 1679426 | 1679554 | 276  | 0       | NE | 0  | NE | 0.00025 | NE |
| Spy49_1693  | -      | 1679707 | 1680216 | 42   | -1      | S  | -1 | S  | -1      | S  |
| Spy49_1694  | gldA   | 1680285 | 1681373 | 169  | 0       | NE | 0  | NE | 0       | NE |
| Spy49_1695c | mipB   | 1681430 | 1682098 | 362  | 0       | NE | 0  | NE | 0       | NE |
| Spy49_1696c | pflD   | 1682111 | 1684528 | 222  | 0       | NE | 0  | NE | 0       | NE |
| Spy49_1697c | -      | 1684739 | 1686043 | 805  | 0       | NE | 0  | NE | 0       | NE |
| Spy49_1698c | -      | 1686053 | 1686361 | 434  | 0       | NE | 0  | NE | 0.00025 | NE |
| Spy49_1699c | -      | 1686389 | 1686709 | 102  | 0       | NE | 0  | NE | 0.00025 | NE |
| Spy49_1700c | -      | 1686996 | 1687976 | 106  | 0       | NE | 0  | NE | 0       | NE |
| Spy49_1701c | -      | 1687992 | 1688741 | 326  | 0       | NE | 0  | NE | 0.00025 | NE |
| Spy49_1702c | -      | 1688864 | 1689637 | 249  | 0       | NE | 0  | NE | 0       | NE |
| Spy49_1703  | secE   | 1689873 | 1690049 | 257  | 0       | NE | 0  | NE | 0.00025 | NE |
| Spy49_1704c | rpmG   | 1690063 | 1690215 | 58   | 0.97525 | U  | 1  | E  | 0.97625 | U  |
| Spy49_1705c | pbp2A  | 1690264 | 1692600 | 50   | -1      | S  | -1 | S  | -1      | S  |
| Spy49_1706c | -      | 1692639 | 1693019 | 778  | 0.00025 | NE | 0  | NE | 0.04025 | U  |
| Spy49_1707c | -      | 1693510 | 1693701 | 126  | 0       | NE | 0  | NE | 0       | NE |
| Spy49_1708  | -      | 1693595 | 1694596 | 63   | 0       | NE | 0  | NE | 0       | NE |
| Spy49_1709  | -      | 1694685 | 1696409 | 333  | 0       | NE | 0  | NE | 0       | NE |
| Spy49_1710c | -      | 1696572 | 1698071 | 574  | 0       | NE | 0  | NE | 0       | NE |
| Spy49_1713  | -      | 1698783 | 1699130 | 499  | 0       | NE | 0  | NE | 0       | NE |
| Spy49_1714c | groEL  | 1699290 | 1700921 | 115  | 0       | NE | 0  | NE | 0       | NE |
| Spy49_1715c | groES  | 1700957 | 1701247 | 543  | 0.9935  | U  | 1  | E  | 1       | E  |
| Spy49_1716c | clpC   | 1701425 | 1703869 | 96   | 0.98425 | U  | 1  | E  | 0.98    | U  |
| Spy49_1717c | ctsR   | 1703869 | 1704330 | 814  | 0.00025 | NE | 0  | NE | 0.00025 | NE |
| Spy49_1718c | csp    | 1704526 | 1704735 | 153  | 0.00025 | NE | 0  | NE | 0       | NE |
| Spy49_1719c | -      | 1705476 | 1706609 | 69   | 0.0135  | NE | 0  | NE | 0       | NE |
| Spy49_1720c | ahpC   | 1707061 | 1707621 | 377  | 0       | NE | 0  | NE | 0       | NE |
| Spy49_1721  | nox3   | 1707642 | 1709174 | 186  | 0       | NE | 0  | NE | 0       | NE |
| Spy49_1722  | hutI   | 1709232 | 1710497 | 510  | 0       | NE | 0  | NE | 0       | NE |
| Spy49_1723c | hutU   | 1710789 | 1712819 | 421  | 0       | NE | 0  | NE | 0       | NE |
| Spy49_1724  | -      | 1712907 | 1713806 | 676  | 0       | NE | 0  | NE | 0       | NE |
| Spy49_1725  | -      | 1713817 | 1714443 | 299  | 0       | NE | 0  | NE | 0.00025 | NE |
| Spy49_1726  | fhs2   | 1714461 | 1716134 | 208  | 0       | NE | 0  | NE | 0       | NE |
| Spy49_1727  | -      | 1716155 | 1716751 | 557  | 0       | NE | 0  | NE | 0.61225 | U  |
| Spy49_1728  | -      | 1716971 | 1718314 | 198  | 0       | NE | 0  | NE | 0       | NE |
| Spy49_1729  | hutH   | 1718326 | 1719867 | 447  | 0       | NE | 0  | NE | 0.00025 | NE |
| Spy49_1730  | hutG   | 1720054 | 1721040 | 513  | 0       | NE | 0  | NE | 0       | NE |
| Spy49_1731  | -      | 1721071 | 1724145 | 328  | 0       | NE | 0  | NE | 0       | NE |
| Spy49_1732c | rpsB   | 1724449 | 1725216 | 1024 | 0.00075 | NE | 0  | NE | 0       | NE |
| Spy49_1733  | tsf    | 1725350 | 1726390 | 255  | 1       | E  | 1  | E  | 0.99925 | E  |
| Spy49_1734  | pepO   | 1726556 | 1728451 | 346  | 0.65075 | U  | 1  | E  | 0.997   | E  |
| Spy49_1735c | dexS   | 1728659 | 1730287 | 631  | 0       | NE | 0  | NE | 0.1435  | U  |
| Spy49_1736c | -      | 1730354 | 1732378 | 542  | 1       | E  | 1  | E  | 1       | E  |
| Spy49_1737c | -      | 1732589 | 1733302 | 674  | 0       | NE | 0  | NE | 0.5975  | U  |
| Spy49_1738  | -      | 1733581 | 1733820 | 237  | 0.00025 | NE | 0  | NE | 0.0005  | NE |



|             |      |         |         |     |         |    |         |    |         |    |
|-------------|------|---------|---------|-----|---------|----|---------|----|---------|----|
| Spy49_1739c | -    | 1734105 | 1734962 | 79  | 0       | NE | 0       | NE | 0       | NE |
| Spy49_1740  | -    | 1735004 | 1735735 | 285 | 0.00025 | NE | 0       | NE | 0.00025 | NE |
| Spy49_1742  | nrdG | 1735909 | 1736523 | 243 | 0.00025 | NE | 0       | NE | 0       | NE |
| Spy49_1743c | -    | 1736523 | 1737032 | 204 | 0.00025 | NE | 0       | NE | 0.91675 | U  |
| Spy49_1744c | -    | 1737041 | 1737976 | 169 | 0.00025 | NE | 0       | NE | 0.00025 | NE |
| Spy49_1745c | -    | 1738005 | 1738151 | 311 | 0.00025 | NE | 1       | E  | 1       | E  |
| Spy49_1746c | nrdD | 1738333 | 1740531 | 48  | -1      | S  | -1      | S  | -1      | S  |
| Spy49_1747c | -    | 1740628 | 1742187 | 732 | 0.00025 | NE | 0       | NE | 0.629   | U  |
| Spy49_1748c | -    | 1742600 | 1742905 | 519 | 0.00025 | NE | 0       | NE | 0       | NE |
| Spy49_1749c | -    | 1742917 | 1743336 | 101 | 0       | NE | 0       | NE | 0.00025 | NE |
| Spy49_1750c | -    | 1743333 | 1743602 | 139 | 0.00025 | NE | 0.19025 | U  | 0.98825 | U  |
| Spy49_1751c | spxA | 1743716 | 1744114 | 89  | 0.00025 | NE | 0       | NE | 0.00025 | NE |
| Spy49_1752c | recA | 1744405 | 1745541 | 132 | 0.0005  | NE | 0.00075 | NE | 0.0005  | NE |
| Spy49_1753c | cinA | 1745629 | 1746900 | 378 | 0       | NE | 0       | NE | 0.984   | U  |
| Spy49_1754c | tag  | 1746969 | 1747529 | 423 | 0       | NE | 0       | NE | 0.00025 | NE |
| Spy49_1755c | ruvA | 1747539 | 1748135 | 186 | 0       | NE | 0       | NE | 0       | NE |
| Spy49_1756c | lmrP | 1748137 | 1749357 | 198 | 0.00375 | NE | 0.92175 | U  | 0.99825 | E  |
| Spy49_1757c | mutL | 1749368 | 1751350 | 406 | 0       | NE | 0       | NE | 0.99275 | E  |
| Spy49_1758c | mutS | 1751480 | 1754035 | 660 | 0.32375 | U  | 0       | NE | 1       | E  |
| Spy49_1759c | -    | 1754371 | 1754706 | 851 | 0.92175 | U  | 0       | NE | 0.2075  | U  |
| Spy49_1761c | argS | 1755099 | 1756790 | 111 | 0       | NE | 0       | NE | 0       | NE |
| Spy49_1762  | -    | 1756878 | 1757186 | 563 | 1       | E  | 1       | E  | 1       | E  |
| Spy49_1763  | -    | 1757213 | 1758085 | 102 | 0       | NE | 0       | NE | 0       | NE |
| Spy49_1764c | -    | 1758128 | 1759063 | 290 | 0       | NE | 0       | NE | 0       | NE |
| Spy49_1765c | -    | 1759026 | 1759967 | 311 | 0.0005  | NE | 0       | NE | 0       | NE |
| Spy49_1767c | aspS | 1759960 | 1761708 | 313 | 0.00025 | NE | 0       | NE | 0.00025 | NE |
| Spy49_1768c | hisS | 1762046 | 1763326 | 582 | 1       | E  | 1       | E  | 1       | E  |
| Spy49_1769c | rpmF | 1763546 | 1763728 | 426 | 1       | E  | 1       | E  | 1       | E  |
| Spy49_1770  | rpmG | 1763744 | 1763893 | 60  | 0       | NE | 0       | NE | 0       | NE |
| Spy49_1771  | -    | 1763933 | 1764157 | 49  | -1      | S  | -1      | S  | -1      | S  |
| Spy49_1772c | cadD | 1764186 | 1764800 | 74  | 0.00025 | NE | 0       | NE | 0       | NE |
| Spy49_1773  | cadX | 1764812 | 1765150 | 204 | 0.00025 | NE | 0       | NE | 0       | NE |
| Spy49_1774  | -    | 1765194 | 1766117 | 112 | 0       | NE | 0       | NE | 0       | NE |
| Spy49_1775  | -    | 1766183 | 1766935 | 307 | 0.00025 | NE | 0       | NE | 0.00025 | NE |
| Spy49_1777  | -    | 1766932 | 1767534 | 250 | 0       | NE | 0       | NE | 0       | NE |
| Spy49_1778  | -    | 1768745 | 1769587 | 200 | 0.00025 | NE | 0       | NE | 0.00075 | NE |
| Spy49_1779  | -    | 1769591 | 1770274 | 280 | 0.00025 | NE | 0       | NE | 0.0075  | NE |
| Spy49_1780c | -    | 1770481 | 1770807 | 227 | 0.00475 | NE | 0       | NE | 0.00025 | NE |
| Spy49_1781  | -    | 1770794 | 1771381 | 108 | 0.00025 | NE | 0       | NE | 0       | NE |
| Spy49_1782  | -    | 1771378 | 1772451 | 195 | 0       | NE | 0       | NE | 0.00025 | NE |
| Spy49_1783  | -    | 1772567 | 1774861 | 357 | 0.00025 | NE | 0       | NE | 0.00025 | NE |
| Spy49_1784c | -    | 1774975 | 1775511 | 764 | 0.00025 | NE | 0       | NE | 0.36525 | U  |
| Spy49_1785  | rpsD | 1775661 | 1776272 | 178 | 0       | NE | 0       | NE | 0       | NE |
| Spy49_1786c | -    | 1777001 | 1777273 | 203 | 0.99975 | E  | 1       | E  | 0.99925 | E  |
| Spy49_1787c | dnaC | 1777290 | 1778657 | 90  | 0.0035  | NE | 0.00025 | NE | 0.00125 | NE |
| Spy49_1788c | rpII | 1778687 | 1779139 | 455 | 1       | E  | 1       | E  | 1       | E  |
| Spy49_1789c | -    | 1779136 | 1781112 | 150 | 0.00025 | NE | 0       | NE | 0.04825 | U  |
| Spy49_1790c | gidA | 1781202 | 1783100 | 658 | 0.98    | U  | 1       | E  | 1       | E  |
| Spy49_1791c | -    | 1783224 | 1783541 | 632 | 0.00275 | NE | 1       | E  | 1       | E  |
| Spy49_1792c | mnmA | 1784316 | 1785437 | 105 | 0.00025 | NE | 0       | NE | 0       | NE |
| Spy49_1793c | sdhB | 1785735 | 1786406 | 373 | 0.9795  | U  | 1       | E  | 1       | E  |
| Spy49_1794  | sdhA | 1786418 | 1787290 | 223 | 0.00025 | NE | 0       | NE | 0       | NE |
| Spy49_1795  | -    | 1787704 | 1788318 | 290 | 0       | NE | 0       | NE | 0.00675 | NE |
| Spy49_1796c | -    | 1788690 | 1789490 | 204 | 0       | NE | 0       | NE | 0       | NE |
| Spy49_1797c | cbiO | 1789483 | 1790325 | 266 | 0.9985  | E  | 1       | E  | 1       | E  |
| Spy49_1798c | cbiO | 1790301 | 1791191 | 280 | 0.9845  | U  | 1       | E  | 1       | E  |
| Spy49_1799c | pgsA | 1791142 | 1791684 | 296 | 0.99975 | E  | 0.99375 | E  | 0.99975 | E  |
| Spy49_1800c | -    | 1791698 | 1792723 | 180 | 0.99975 | E  | 1       | E  | 1       | E  |
| Spy49_1801c | -    | 1792773 | 1794062 | 341 | 0       | NE | 0       | NE | 0       | NE |
| Spy49_1802c | -    | 1794064 | 1795308 | 429 | 0       | NE | 0       | NE | 0       | NE |
| Spy49_1803c | hasA | 1795670 | 1797007 | 414 | 0       | NE | 0       | NE | 0       | NE |
| Spy49_1804  | hasB | 1797043 | 1798251 | 445 | 0.00025 | NE | 0       | NE | 0       | NE |
| Spy49_1806  | hasC | 1798433 | 1799347 | 402 | 0.00025 | NE | 0       | NE | 0       | NE |
| Spy49_1808  | -    | 1799655 | 1800068 | 304 | 0.0005  | NE | 0       | NE | 0.00125 | NE |
| Spy49_1809  | recF | 1800070 | 1801176 | 137 | 0       | NE | 0       | NE | 0       | NE |
| Spy49_1810  | -    | 1801232 | 1802095 | 368 | 0.0005  | NE | 0       | NE | 0.67575 | U  |
| Spy49_1811c | guaB | 1802298 | 1803779 | 287 | 0       | NE | 0       | NE | 0       | NE |
| Spy49_1812c | trsA | 1804087 | 1805109 | 493 | 0.00025 | NE | 0       | NE | 0       | NE |

|             |      |         |         |     |         |    |         |    |         |    |
|-------------|------|---------|---------|-----|---------|----|---------|----|---------|----|
| Spy49_1813c | -    | 1805528 | 1806400 | 340 | 1       | E  | 1       | E  | 1       | E  |
| Spy49_1814  | -    | 1806479 | 1808086 | 290 | 0       | NE | 0       | NE | 0       | NE |
| Spy49_1815  | -    | 1808184 | 1810760 | 535 | 0       | NE | 0       | NE | 0       | NE |
| Spy49_1817  | -    | 1813005 | 1813484 | 858 | 0.00225 | NE | 0.00025 | NE | 0.017   | NE |
| Spy49_1819c | degP | 1813696 | 1814919 |     | 0       | NE | 0       | NE | 0.00025 | NE |
| Spy49_1820c | parB | 1814978 | 1815784 | 159 | 0       | NE | 0       | NE | 0       | NE |
| Spy49_1821  |      |         |         | 407 | 0.9795  | U  | 1       | E  | 0.99975 | E  |
| Spy49_1822  |      |         |         | 268 | 0.00025 | NE | 0       | NE | 0.00025 | NE |

**Table S6. Integrated gene essentiality determination for GAS M49 NZ131 for all time points.**

(a) Spy numbers from GAS NZ131 genome.  
 (b) When available, gene name is provided.  
 (c) Call integrating data from Bayesian analyses on 3 time points.  
 (d) Hyperlink to the NCBI Gene website (<http://www.ncbi.nlm.nih.gov/gene>).

| Locus Tag(a) | Gene Name(b) | Call(c) | Start  | Stop   | Length | Strand | Gene ID(d) | COG Designation | Protein Function                                                                                      |
|--------------|--------------|---------|--------|--------|--------|--------|------------|-----------------|-------------------------------------------------------------------------------------------------------|
| Spy49_0001   | dnaA         | NC      | 232    | 1587   | 451    | +      | 6986144    | COG0593L        | chromosomal replication initiation protein                                                            |
| Spy49_0002   | dnaN         | E       | 1742   | 2878   | 378    | +      | 6984517    | COG0592L        | DNA polymerase III subunit beta                                                                       |
| Spy49_0003   | -            | NE      | 2953   | 3150   | 65     | +      | 6984518    | COG4481S        | hypothetical protein Spy49_0003                                                                       |
| Spy49_0004   | -            | NE      | 3480   | 4595   | 371    | +      | 6984519    | COG0012J        | GTP-dependent nucleic acid-binding protein EngD                                                       |
| Spy49_0005   | pth          | E       | 4665   | 5234   | 189    | +      | 6984520    | COG0193J        | peptidyl-tRNA hydrolase                                                                               |
| Spy49_0006   | trcF         | NE      | 5321   | 8740   | 1139   | +      | 6984521    | COG1197LK       | transcription-repair coupling factor                                                                  |
| Spy49_0008   | -            | NE      | 8902   | 9174   | 90     | +      | 6984522    | COG1188J        | hypothetical protein Spy49_0008                                                                       |
| Spy49_0009   | diviC        | NC      | 9161   | 9532   | 123    | +      | 6984523    | COG2919D        | cell division protein                                                                                 |
| Spy49_0010   | -            | NE      | 9667   | 10953  | 428    | +      | 6984524    | COG2367V        | hypothetical protein Spy49_0010                                                                       |
| Spy49_0011   | mesJ         | E       | 10950  | 12236  | 428    | +      | 6984525    | COG0037D        | tRNA(Ile)-lysidine synthetase                                                                         |
| Spy49_0012   | hpt          | NE      | 12241  | 12783  | 180    | +      | 6984526    | COG0634F        | Hypoxanthine-guanine phosphoribosyltransferase                                                        |
| Spy49_0013   | ftsH         | E       | 12805  | 14784  | 659    | +      | 6984527    | COG0465O        | cell division protein FtsH                                                                            |
| Spy49_0014   | -            | NE      | 15041  | 16501  | 486    | +      | 6984528    | COG0531E        | amino acid permease                                                                                   |
| Spy49_0015   | -            | E       | 31169  | 32365  | 398    | +      | 6984563    | COG3883S        | secreted protein strept secreted protein                                                              |
| Spy49_0016   | prsA         | E       | 32618  | 33580  | 320    | +      | 6984564    | COG0462FE       | ribose-phosphate pyrophosphokinase                                                                    |
| Spy49_0017   | recO         | E       | 33766  | 34521  | 251    | +      | 6984565    | COG1381L        | DNA repair protein RecO                                                                               |
| Spy49_0018   | -            | E       | 34624  | 35631  | 335    | +      | 6984566    | COG0416I        | glycerol-3-phosphate acyltransferase PlsX                                                             |
| Spy49_0019   | acp          | NC      | 35624  | 35866  | 80     | +      | 6984567    | COG0236IQ       | acyl carrier protein                                                                                  |
| Spy49_0020   | purC         | NE      | 35987  | 36721  | 244    | +      | 6984568    | COG0152F        | phosphoribosylaminoimidazole-succinocarboxamide synthase                                              |
| Spy49_0021   | purL         | NE      | 36798  | 40571  | 1257   | +      | 6984569    | COG0046F        | phosphoribosylformylglycinamide synthetase, synthetase subunit/phosphoribosylformylglycinamide syn... |
| Spy49_0022   | purF         | NE      | 40805  | 42259  | 484    | +      | 6984570    | COG0034F        | amidophosphoribosyltransferase                                                                        |
| Spy49_0023   | purM         | NE      | 42287  | 43309  | 340    | +      | 6984571    | COG0150F        | phosphoribosylaminoimidazole synthetase                                                               |
| Spy49_0024   | purN         | NE      | 43477  | 44031  | 184    | +      | 6984572    | COG0299F        | phosphoribosylglycinamide formyltransferase                                                           |
| Spy49_0025   | purH         | NE      | 44215  | 45762  | 515    | +      | 6984573    | COG0138F        | bifunctional phosphoribosylaminoimidazolecarboxamide formyltransferase/IMP cyclohydrolase             |
| Spy49_0026c  | -            | NE      | 45820  | 46944  | 374    | -      | 6984574    | COG3942R        | Autolysin                                                                                             |
| Spy49_0027   | purD         | NE      | 47107  | 48462  | 451    | +      | 6984575    | COG0151F        | phosphoribosylamine-glycine ligase                                                                    |
| Spy49_0028   | purE         | NE      | 48621  | 49232  | 203    | +      | 6984576    | COG0041F        | phosphoribosylaminoimidazole carboxylase catalytic subunit                                            |
| Spy49_0029   | purK         | NE      | 49216  | 50292  | 358    | +      | 6984577    | COG0026F        | phosphoribosylaminoimidazole carboxylase ATPase subunit                                               |
| Spy49_0030   | -            | NE      | 50394  | 51875  | 493    | +      | 6984578    | -               | hypothetical protein Spy49_0030                                                                       |
| Spy49_0031   | purB         | NE      | 52048  | 53340  | 430    | +      | 6984579    | COG0015F        | adenylsuccinate lyase                                                                                 |
| Spy49_0032   | -            | NE      | 53471  | 54391  | 306    | +      | 6984580    | -               | Cro/Ci family transcriptional regulator                                                               |
| Spy49_0033   | ruvB         | C       | 54617  | 55615  | 332    | +      | 6984581    | COG2255L        | Holliday junction DNA helicase RuvB                                                                   |
| Spy49_0035   | -            | NE      | 55753  | 56190  | 145    | +      | 6984582    | COG0394T        | protein tyrosine phosphatase                                                                          |
| Spy49_0036   | -            | E       | 56213  | 56614  | 133    | +      | 6984663    | COG4642S        | hypothetical protein Spy49_0036                                                                       |
| Spy49_0037   | -            | E       | 56611  | 58386  | 591    | +      | 6984664    | COG1835I        | acyltransferase                                                                                       |
| Spy49_0038   | adhE         | NE      | 58695  | 61337  | 880    | +      | 6984665    | COG1454C        | bifunctional acetaldehyde-CoA/alcohol dehydrogenase                                                   |
| Spy49_0039   | adhP         | NE      | 61589  | 62605  | 338    | +      | 6984666    | COG1064R        | alcohol dehydrogenase                                                                                 |
| Spy49_0040   | norM         | NE      | 62993  | 64282  | 429    | +      | 6984667    | COG0534V        | Na+ driven multidrug efflux pump                                                                      |
| Spy49_0044   | rpSI         | NC      | 64481  | 64789  | 102    | +      | 6984668    | COG0051J        | 30S ribosomal protein S10                                                                             |
| Spy49_0045   | rpIC         | E       | 65037  | 65663  | 208    | +      | 6984669    | COG0087J        | 50S ribosomal protein L3                                                                              |
| Spy49_0046   | rpID         | NC      | 65687  | 66310  | 207    | +      | 6984670    | COG0088J        | 50S ribosomal protein L4                                                                              |
| Spy49_0048   | rpIW         | NC      | 66310  | 66540  | 76     | +      | 6984671    | COG0089J        | 50S ribosomal protein L23p                                                                            |
| Spy49_0049   | rpIB         | E       | 66625  | 67458  | 277    | +      | 6984672    | COG0090J        | 50S ribosomal protein L2                                                                              |
| Spy49_0050   | rpS          | NC      | 67597  | 67875  | 92     | +      | 6984673    | COG0185J        | 30S ribosomal protein S19                                                                             |
| Spy49_0052   | rpIV         | NC      | 67891  | 68235  | 114    | +      | 6984674    | COG0091J        | 50S ribosomal protein L22                                                                             |
| Spy49_0053   | rpSC         | E       | 68275  | 68901  | 208    | +      | 6984675    | COG0092J        | 30S ribosomal protein S3                                                                              |
| Spy49_0054   | rpIP         | E       | 68905  | 69318  | 137    | +      | 6984676    | COG0197J        | 50S ribosomal protein L16                                                                             |
| Spy49_0055   | rpmC         | NC      | 69328  | 69534  | 68     | +      | 6984677    | COG0255J        | 50S ribosomal protein L29                                                                             |
| Spy49_0056   | rpSQ         | NC      | 69560  | 69820  | 86     | +      | 6984678    | COG0186J        | 30S ribosomal protein S17                                                                             |
| Spy49_0057   | rpIN         | NC      | 69845  | 70213  | 122    | +      | 6984679    | COG0093J        | 50S ribosomal protein L14                                                                             |
| Spy49_0058   | rpIX         | E       | 70292  | 70597  | 101    | +      | 6984680    | COG0198J        | 50S ribosomal protein L24                                                                             |
| Spy49_0059   | rpIE         | NC      | 70621  | 71163  | 180    | +      | 6984681    | COG0094J        | 50S ribosomal protein L5                                                                              |
| Spy49_0060   | rpSN.1       | NC      | 71179  | 71364  | 61     | +      | 6984682    | COG0199J        | 30S ribosomal protein S14p                                                                            |
| Spy49_0061   | rpSH         | NC      | 71515  | 71913  | 132    | +      | 6984683    | COG0096J        | 30S ribosomal protein S8                                                                              |
| Spy49_0062   | rpIF         | E       | 72116  | 72652  | 178    | +      | 6984684    | COG0097J        | 50S ribosomal protein L6                                                                              |
| Spy49_0064   | rpIR         | NC      | 72757  | 73113  | 118    | +      | 6984685    | COG0256J        | 50S ribosomal protein L18                                                                             |
| Spy49_0065   | rpSE         | NC      | 73132  | 73626  | 164    | +      | 6984686    | COG0098J        | 30S ribosomal protein S5                                                                              |
| Spy49_0066   | rpmD         | NC      | 73641  | 73823  | 60     | +      | 6984687    | COG1841J        | 50S ribosomal protein L30                                                                             |
| Spy49_0067   | rpIO         | NC      | 74038  | 74478  | 146    | +      | 6984688    | COG0200J        | 50S ribosomal protein L15                                                                             |
| Spy49_0068   | secY         | E       | 74495  | 75799  | 434    | +      | 6984689    | COG0201U        | preprotein translocase subunit SecY                                                                   |
| Spy49_0069   | adk          | E       | 75949  | 76587  | 212    | +      | 6984690    | COG0563F        | adenylate kinase                                                                                      |
| Spy49_0070   | infA         | NC      | 76705  | 76923  | 72     | +      | 6984691    | COG0361J        | translation initiation factor IF-1                                                                    |
| Spy49_0071   | rpmJ         | NC      | 76949  | 77065  | 38     | +      | 6984692    | COG0257J        | 50S ribosomal protein L36                                                                             |
| Spy49_0072   | rpSM         | E       | 77083  | 77448  | 121    | +      | 6984693    | COG0099J        | 30S ribosomal protein S13                                                                             |
| Spy49_0073   | rpSK         | NC      | 77466  | 77849  | 127    | +      | 6984694    | COG0100J        | 30S ribosomal protein S11                                                                             |
| Spy49_0074   | rpoA         | E       | 77895  | 78833  | 312    | +      | 6984695    | COG0202K        | DNA-directed RNA polymerase subunit alpha                                                             |
| Spy49_0075   | rpIQ         | NC      | 78848  | 79234  | 128    | +      | 6984696    | COG0203J        | 50S ribosomal protein L17                                                                             |
| Spy49_0078   | -            | NE      | 87367  | 87615  | 82     | +      | 6984713    | COG1947I        | 4-diphosphocytidyl-2-C-methyl-D-erythritol kinase                                                     |
| Spy49_0079   | -            | NE      | 87670  | 87882  | 70     | +      | 6984714    | COG1947I        | 4-diphosphocytidyl-2-C-methyl-D-erythritol kinase                                                     |
| Spy49_0080   | adrR         | NE      | 87992  | 88435  | 147    | +      | 6984715    | COG1846K        | repressor protein                                                                                     |
| Spy49_0081   | adrC         | NC      | 88439  | 89158  | 239    | +      | 6984716    | COG1121P        | ABC transporter                                                                                       |
| Spy49_0082   | adrB         | NC      | 89151  | 89966  | 271    | +      | 6984717    | COG1108P        | ABC transporter                                                                                       |
| Spy49_0083c  | -            | NE      | 90006  | 90389  | 127    | -      | 6984718    | COG0537FGR      | histidine triad (HIT) protein                                                                         |
| Spy49_0084   | tyrS         | E       | 90440  | 91696  | 418    | +      | 6984719    | COG0162J        | tyrosyl-tRNA synthetase                                                                               |
| Spy49_0086   | pbp1b        | NE      | 91800  | 94100  | 766    | +      | 6984720    | COG0744M        | multimodular transpeptidase-transglycosylase                                                          |
| Spy49_0087   | rpoB         | E       | 94364  | 97930  | 1188   | +      | 6984721    | COG0085K        | DNA-directed RNA polymerase subunit beta                                                              |
| Spy49_0088   | rpoC         | E       | 98048  | 101662 | 1204   | +      | 6984722    | COG0086K        | DNA-directed RNA polymerase subunit beta'                                                             |
| Spy49_0089   | -            | NE      | 101814 | 102179 | 121    | +      | 6984723    | COG4699S        | DNA binding protein                                                                                   |
| Spy49_0090   | comYA        | NE      | 102272 | 103210 | 312    | +      | 6984724    | COG2804NU       | ABC transporter                                                                                       |
| Spy49_0091   | comYB        | NE      | 103305 | 104180 | 291    | +      | 6984725    | COG1459NU       | competence protein, ABC transporter subunit                                                           |
| Spy49_0092   | comYC        | NE      | 104182 | 104508 | 108    | +      | 6984726    | COG4537U        | competence protein                                                                                    |
| Spy49_0093   | -            | NE      | 104483 | 104911 | 142    | +      | 6984727    | COG2165NU       | Competence protein                                                                                    |
| Spy49_0094   | -            | NE      | 104868 | 105152 | 94     | +      | 6984728    | -               | hypothetical protein Spy49_0094                                                                       |
| Spy49_0095   | comYD        | NE      | 105145 | 105579 | 144    | +      | 6984729    | COG4940U        | competence protein                                                                                    |
| Spy49_0096   | -            | NE      | 105599 | 105889 | 96     | +      | 6984730    | -               | hypothetical protein Spy49_0096                                                                       |
| Spy49_0097   | -            | NE      | 105987 | 106940 | 317    | +      | 6984731    | COG0827L        | adenine-specific methyltransferase                                                                    |
| Spy49_0098   | ackA         | NC      | 106999 | 108195 | 398    | +      | 6984732    | COG0282C        | acetate kinase                                                                                        |
| Spy49_0099   | -            | NE      | 108381 | 108623 | 80     | +      | 6984733    | -               | hypothetical protein Spy49_0099                                                                       |
| Spy49_0100   | proC         | NE      | 108772 | 109542 | 256    | -      | 6984734    | COG0345E        | pyrroline-5-carboxylate reductase                                                                     |
| Spy49_0101   | pepA         | NE      | 109590 | 110657 | 355    | -      | 6984735    | COG1363G        | glutamyl-aminopeptidase                                                                               |
| Spy49_0103   | -            | NE      | 112439 | 112732 | 97     | +      | 6984736    | -               | hypothetical protein Spy49_0103                                                                       |
| Spy49_0104   | trx.1        | NE      | 112729 | 113046 | 105    | +      | 6984737    | COG0526OC       | thioredoxin                                                                                           |
| Spy49_0105   | -            | NE      | 113064 | 113708 | 214    | +      | 6984738    | COG0073R        | tRNA binding domain-containing protein                                                                |
| Spy49_0107   | ssb          | NE      | 113842 | 114237 | 131    | +      | 6984739    | COG0629L        | single-stranded DNA-binding protein                                                                   |
| Spy49_0108c  | -            | NE      | 114497 | 115138 | 213    | -      | 6984740    | COG1428F        | deoxyadenosine kinase/deoxyguanosine kinase                                                           |
| Spy49_0109c  | -            | NE      | 115158 | 116135 | 325    | -      | 6984741    | COG0042J        | transcriptional regulator                                                                             |
| Spy49_0110c  | hslO         | NE      | 116122 | 116994 | 290    | -      | 6984742    | COG1281O        | Hsp33-like chaperonin                                                                                 |
| Spy49_0111   | nra          | NE      | 117120 | 118655 | 511    | -      | 6984823    | -               | Regulatory protein                                                                                    |
| Spy49_0112   | cbp          | NE      | 119085 | 121319 | 744    | +      | 6984824    | -               | collagen binding protein                                                                              |
| Spy49_0113   | lepA-1       | NE      | 121312 | 121833 | 173    | +      | 6984825    | COG4959OU       | signal peptidase I                                                                                    |
| Spy49_0114   | -            | NE      | 121855 | 122889 | 344    | +      | 6984826    | -               | hypothetical protein Spy49_0114                                                                       |

|             |        |    |        |        |      |   |         |           |                                                                  |
|-------------|--------|----|--------|--------|------|---|---------|-----------|------------------------------------------------------------------|
| Spy49_0116  | -      | NE | 122905 | 123630 | 241  | + | 6984827 | COG45095  | NPQTN specific sortase B                                         |
| Spy49_0117  | -      | NE | 123665 | 124234 | 189  | + | 6984828 | -         | hypothetical protein Spy49_0117                                  |
| Spy49_0118  | msmR   | NE | 124394 | 125599 | 401  | - | 6984829 | COG2207K  | AraC family transcriptional regulator                            |
| Spy49_0119  | prtF   | NE | 125984 | 129466 | 1160 | + | 6984830 | COG4932M  | fibronectin binding protein                                      |
| Spy49_0120c | -      | NE | 129731 | 130396 | 221  | - | 6984831 | -         | hypothetical protein Spy49_0120c                                 |
| Spy49_0121  | atoE   | NE | 130750 | 132156 | 468  | + | 6984832 | COG2031I  | short-chain fatty acids transporter                              |
| Spy49_0122c | -      | NE | 132231 | 133142 | 303  | - | 6984833 | COG0583K  | transcriptional regulator                                        |
| Spy49_0123  | -      | NE | 133263 | 134447 | 394  | + | 6984834 | COG0183I  | acetyl-CoA acetyltransferase                                     |
| Spy49_0124  | atoD.2 | NE | 134459 | 135118 | 219  | + | 6984835 | COG1788I  | acetate CoA-transferase subunit alpha                            |
| Spy49_0125  | -      | NE | 135121 | 135768 | 215  | + | 6984836 | COG2057I  | Butyrate-acetoacetate CoA-transferase subunit beta               |
| Spy49_0126c | -      | NE | 135890 | 136570 | 226  | - | 6984837 | COG2964S  | transcriptional regulator                                        |
| Spy49_0127  | -      | NE | 136745 | 137110 | 121  | + | 6984838 | COG0251J  | translation initiation inhibitor                                 |
| Spy49_0128  | sloR   | NE | 137147 | 138166 | 339  | + | 6984839 | COG1299G  | regulatory protein                                               |
| Spy49_0129  | -      | NE | 138620 | 138940 | 106  | + | 6984840 | -         | hypothetical protein Spy49_0129                                  |
| Spy49_0130  | ntpI   | NE | 138930 | 140930 | 666  | + | 6984841 | COG1269C  | V-type ATP synthase subunit I                                    |
| Spy49_0131  | ntpK   | NE | 140932 | 141411 | 159  | + | 6984842 | COG0636C  | V-type ATP synthase subunit K                                    |
| Spy49_0132  | ntpE   | NE | 141479 | 142063 | 194  | + | 6984843 | -         | V-type Na <sup>+</sup> -ATPase subunit E                         |
| Spy49_0133  | ntpC   | NE | 142079 | 143077 | 332  | + | 6984844 | COG1527C  | V-type sodium ATP synthase subunit C                             |
| Spy49_0134  | ntpG   | NE | 143074 | 143394 | 106  | + | 6984845 | COG1436C  | V-type ATP synthase subunit F                                    |
| Spy49_0135  | ntpA   | NE | 143595 | 145370 | 591  | + | 6984846 | COG1155C  | V-type ATP synthase subunit A                                    |
| Spy49_0136  | ntpB   | NE | 145371 | 146786 | 471  | + | 6984847 | COG1156C  | V-type ATP synthase subunit B                                    |
| Spy49_0137  | ntpD   | NE | 146831 | 147457 | 208  | + | 6984848 | COG1394C  | V-type ATP synthase subunit D                                    |
| Spy49_0138c | -      | NE | 147577 | 148839 | 420  | - | 6984849 | COG3853P  | toxic anion resistance protein                                   |
| Spy49_0139c | -      | NE | 148852 | 149730 | 292  | - | 6984850 | -         | hypothetical protein Spy49_0139c                                 |
| Spy49_0141  | purA   | NE | 150168 | 151460 | 430  | + | 6984851 | COG0104F  | adenylosuccinate synthetase                                      |
| Spy49_0142  | -      | NE | 151787 | 152830 | 347  | + | 6984852 | COG1744R  | ABC transporter                                                  |
| Spy49_0143  | nusG   | NC | 152988 | 153542 | 184  | + | 6984853 | COG0250K  | transcription antitermination protein NusG                       |
| Spy49_0144  | nga    | NE | 153917 | 155272 | 451  | + | 6984854 | -         | Nicotine adenine dinucleotide glycohydrolase (NADGH)             |
| Spy49_0145  | -      | NE | 155277 | 155762 | 161  | + | 6984855 | -         | hypothetical protein Spy49_0145                                  |
| Spy49_0146  | slo    | NE | 155786 | 157501 | 571  | + | 6984856 | -         | Thiol-activated cytolysin                                        |
| Spy49_0147  | -      | NC | 157756 | 158184 | 142  | + | 6984857 | -         | hypothetical protein Spy49_0147                                  |
| Spy49_0148  | -      | NC | 158408 | 158701 | 97   | + | 6984858 | -         | hypothetical protein Spy49_0148                                  |
| Spy49_0149c | -      | NE | 158998 | 159165 | 55   | - | 6984859 | -         | hypothetical protein Spy49_0149c                                 |
| Spy49_0150c | -      | E  | 159350 | 159676 | 108  | - | 6984860 | -         | hypothetical protein Spy49_0150c                                 |
| Spy49_0151  | metB   | NE | 159929 | 161299 | 456  | + | 6984861 | COG0626E  | cystathionine beta-lyase                                         |
| Spy49_0152  | leuS   | E  | 161510 | 164011 | 833  | + | 6984862 | COG0495J  | leucyl-tRNA synthetase                                           |
| Spy49_0153  | -      | NE | 164318 | 165751 | 477  | + | 6984863 | COG3037S  | PTS system ascorbate-specific transporter subunit IIC            |
| Spy49_0154  | -      | NE | 165822 | 166100 | 92   | + | 6984864 | COG3414G  | PTS system IIB component                                         |
| Spy49_0155  | -      | NE | 166223 | 166708 | 161  | + | 6984865 | COG1762GT | PTS system IIA component                                         |
| Spy49_0156  | ulaD   | NC | 166799 | 167461 | 220  | + | 6984866 | COG0269G  | 3-keto-L-gulonate-6-phosphate decarboxylase                      |
| Spy49_0157  | -      | NE | 167466 | 168329 | 287  | + | 6984867 | COG3623G  | L-xylulose 5-phosphate 3-epimerase                               |
| Spy49_0158  | araD   | NE | 168331 | 169035 | 234  | + | 6984868 | COG0235G  | L-ribulose-5-phosphate 4-epimerase                               |
| Spy49_0159  | -      | NE | 169361 | 171007 | 548  | + | 6984869 | COG3711K  | transcriptional regulator                                        |
| Spy49_0160  | -      | NE | 171261 | 172352 | 363  | + | 6984870 | COG2220R  | L-ascorbate 6-phosphate lactonase                                |
| Spy49_0161  | opuAA  | NE | 172842 | 174038 | 398  | + | 6984871 | COG4175E  | L-proline glycine betaine ABC transport ATP-binding protein proV |
| Spy49_0162  | opuABC | NE | 174054 | 175781 | 575  | + | 6984872 | COG4176E  | glycine/betaine ABC transporter permease                         |
| Spy49_0163  | polA   | E  | 175912 | 178554 | 880  | + | 6984873 | COG0749L  | DNA polymerase I                                                 |
| Spy49_0164  | -      | NE | 178732 | 179187 | 151  | + | 6984874 | COG1832R  | CoA-binding domain-containing protein                            |
| Spy49_0165  | -      | NE | 179239 | 179706 | 155  | + | 6984875 | COG0735P  | ferric transport regulator protein                               |
| Spy49_0166  | -      | NE | 179862 | 180161 | 99   | + | 6984876 | -         | M protein trans-acting positive regulator-like protein           |
| Spy49_0167  | -      | NE | 180383 | 181171 | 444  | + | 6984877 | COG3969R  | hypothetical protein Spy49_0167                                  |
| Spy49_0168  | -      | NE | 181710 | 182090 | 126  | + | 6984878 | COG1475K  | hypothetical protein Spy49_0168                                  |
| Spy49_0169  | -      | NE | 182234 | 182443 | 69   | + | 6984879 | -         | hypothetical protein Spy49_0169                                  |
| Spy49_0170c | -      | NE | 182570 | 182785 | 71   | - | 6984880 | COG2801L  | transposase                                                      |
| Spy49_0173c | -      | NE | 183427 | 183720 | 97   | - | 6984881 | COG2963L  | hypothetical protein Spy49_0173c                                 |
| Spy49_0176  | -      | NE | 185332 | 186204 | 290  | + | 6984883 | COG0157H  | nicotinate-nucleotide pyrophosphorylase                          |
| Spy49_0178c | -      | NE | 186865 | 187311 | 148  | - | 6984884 | COG2801L  | transposase, IS861                                               |
| Spy49_0180c | -      | NE | 187933 | 188796 | 287  | - | 6984885 | COG5523S  | hypothetical protein Spy49_0180c                                 |
| Spy49_0181  | tgt    | NE | 189015 | 190157 | 380  | + | 6984886 | COG0343J  | queuine tRNA-ribosyltransferase                                  |
| Spy49_0182  | -      | NE | 190374 | 190685 | 103  | + | 6984887 | COG4357S  | hypothetical protein Spy49_0182                                  |
| Spy49_0183  | bioY   | NE | 190689 | 191228 | 179  | + | 6984888 | COG1268R  | Biotin transporter bioY                                          |
| Spy49_0184  | -      | NE | 191368 | 192147 | 259  | + | 6984889 | COG1234R  | hypothetical protein Spy49_0184                                  |
| Spy49_0185  | -      | NE | 192147 | 192662 | 171  | + | 6984890 | COG0590FJ | cytosine deaminase                                               |
| Spy49_0186c | -      | NE | 193276 | 194496 | 406  | - | 6984891 | COG5279D  | hypothetical protein Spy49_0186c                                 |
| Spy49_0187  | speG   | NE | 194908 | 195612 | 234  | + | 6984892 | -         | Exotoxin type G                                                  |
| Spy49_0188  | pgi    | E  | 196067 | 197416 | 449  | + | 6984893 | COG0166G  | glucose-6-phosphate isomerase                                    |
| Spy49_0189c | -      | NE | 197875 | 199272 | 465  | - | 6984894 | -         | RofA family transcriptional regulator                            |
| Spy49_0190  | -      | NE | 199964 | 200635 | 223  | + | 6984895 | COG0705R  | hypothetical protein Spy49_0190                                  |
| Spy49_0191c | hasC.2 | E  | 200734 | 201633 | 299  | - | 6984896 | COG1210M  | UTP-glucose-1-phosphate uridylyltransferase                      |
| Spy49_0192c | gpsA   | E  | 201666 | 202682 | 338  | - | 6984897 | COG0240C  | NAD(P)H-dependent glycerol-3-phosphate dehydrogenase             |
| Spy49_0193  | -      | NE | 203220 | 203426 | 68   | + | 6984898 | -         | MarK family transcriptional regulator, partial                   |
| Spy49_0194  | -      | NC | 203419 | 205125 | 568  | + | 6984899 | COG1132V  | ABC transporter ATP-binding protein                              |
| Spy49_0195  | -      | NE | 205128 | 206912 | 594  | + | 6984900 | COG1132V  | ABC transporter ATP-binding protein/permease                     |
| Spy49_0198  | -      | NE | 207105 | 207797 | 230  | + | 6984901 | COG1636S  | hypothetical protein Spy49_0198                                  |
| Spy49_0199  | dut    | NE | 207907 | 208365 | 152  | + | 6984902 | COG0756F  | deoxyuridine 5'-triphosphate nucleotidohydrolase                 |
| Spy49_0200  | radA   | NE | 208402 | 209796 | 464  | + | 6984983 | COG10660  | DNA repair protein RadA                                          |
| Spy49_0201  | -      | NC | 209985 | 210482 | 165  | + | 6984984 | COG0288P  | carbonic anhydrase                                               |
| Spy49_0202  | -      | NE | 210613 | 211323 | 236  | + | 6984985 | COG2013S  | hypothetical protein Spy49_0202                                  |
| Spy49_0203  | gltX   | E  | 211506 | 212996 | 496  | + | 6984986 | COG0008J  | glutamyl-tRNA synthetase                                         |
| Spy49_0204  | fasB   | NE | 213347 | 214693 | 448  | + | 6984987 | COG2927T  | histidine kinase                                                 |
| Spy49_0205  | -      | NC | 214690 | 215973 | 427  | + | 6984988 | COG2927T  | histidine kinase                                                 |
| Spy49_0206  | fasA   | NE | 215977 | 216717 | 246  | + | 6984989 | COG3279KT | Response regulator FasA                                          |
| Spy49_0207  | rnpA   | NC | 217257 | 217616 | 119  | + | 6984990 | COG0594J  | ribonuclease P                                                   |
| Spy49_0208  | -      | NE | 217600 | 218409 | 269  | + | 6984991 | COG0706U  | hypothetical protein Spy49_0208                                  |
| Spy49_0209  | -      | NC | 218421 | 219335 | 304  | + | 6984992 | COG1847R  | R3H domain-containing protein                                    |
| Spy49_0210  | rpmH   | NC | 219650 | 219784 | 44   | + | 6984993 | -         | 50S ribosomal protein L34                                        |
| Spy49_0211  | -      | NE | 220058 | 220762 | 234  | + | 6984994 | COG3010G  | N-acetylmannosamine-6-phosphate 2-epimerase                      |
| Spy49_0212  | -      | NE | 220811 | 222130 | 439  | + | 6984995 | COG1653G  | sugar ABC transporter substrate-binding protein                  |
| Spy49_0213  | -      | NE | 222235 | 223122 | 295  | + | 6984996 | COG1175G  | sugar ABC transporter                                            |
| Spy49_0214  | -      | NE | 223135 | 223965 | 276  | + | 6984997 | COG0395G  | sugar ABC transporter permease                                   |
| Spy49_0215  | -      | NE | 224179 | 224784 | 201  | + | 6984998 | COG5578S  | hypothetical protein Spy49_0215                                  |
| Spy49_0216  | nanH   | NE | 224796 | 225710 | 304  | + | 6984999 | COG0329EM | aclyneuraminatase lyase                                          |
| Spy49_0217  | -      | NE | 225732 | 226670 | 312  | + | 6985000 | COG1940KG | glucose kinase                                                   |
| Spy49_0218c | -      | NE | 226781 | 227611 | 276  | + | 6985001 | COG1737K  | phosphosugar-binding transcriptional regulator                   |
| Spy49_0219  | -      | NE | 227863 | 228687 | 274  | + | 6985002 | COG0084L  | Sec-independent protein TatD                                     |
| Spy49_0220  | -      | NE | 228659 | 229249 | 196  | + | 6985003 | COG1658L  | ribonuclease M5                                                  |
| Spy49_0221  | ksgA   | NE | 229363 | 230235 | 290  | + | 6985004 | COG0030J  | dimethyladenosine transferase                                    |
| Spy49_0223  | engC   | NE | 230662 | 231534 | 290  | + | 6985005 | COG1162R  | ribosome-associated GTPase                                       |
| Spy49_0224  | rpe    | NC | 231544 | 232206 | 220  | + | 6985006 | COG0036G  | ribose-phosphate 3-epimerase                                     |
| Spy49_0225  | -      | NE | 232199 | 232831 | 210  | + | 6985007 | COG1564H  | thiamin pyrophosphokinase                                        |
| Spy49_0226  | -      | NE | 232833 | 234104 | 423  | + | 6985008 | COG1322S  | hypothetical protein Spy49_0226                                  |
| Spy49_0227  | cbf    | NE | 234094 | 235032 | 312  | + | 6985009 | COG3481R  | CMP-binding factor                                               |
| Spy49_0228  | purR   | NE | 235298 | 236137 | 279  | + | 6985010 | COG0503F  | pur operon repressor                                             |
| Spy49_0229  | prgA   | NE | 236128 | 238749 | 873  | + | 6985011 | -         | surface exclusion protein                                        |
| Spy49_0230  | rpsL   | NC | 238963 | 239367 | 134  | + | 6985012 | -         | 30S ribosomal protein S12, partial                               |
| Spy49_0231  | rpsG   | E  | 239388 | 239858 | 156  | + | 6985013 | COG0049J  | 30S ribosomal protein S7                                         |
| Spy49_0233  | fusA   | E  | 240225 | 242303 | 692  | + | 6985014 | COG0480J  | elongation factor G                                              |

|             |        |    |        |        |      |   |         |            |                                                                                |
|-------------|--------|----|--------|--------|------|---|---------|------------|--------------------------------------------------------------------------------|
| Spy49_0234  | plr    | E  | 242651 | 243661 | 336  | + | 6985015 | COG0057G   | NAD-dependent glyceraldehyde-3-phosphate dehydrogenase                         |
| Spy49_0235c | -      | NC | 243887 | 244003 | 38   | - | 6985016 | -          | hypothetical protein Spy49_0235c                                               |
| Spy49_0236c | -      | NE | 244145 | 244885 | 246  | - | 6985017 | COG1126E   | amino acid ABC transporter ATP-binding protein                                 |
| Spy49_0237c | -      | NE | 244951 | 246447 | 498  | - | 6985018 | COG0765E   | glutamine-binding periplasmic protein                                          |
| Spy49_0238  | -      | NE | 246645 | 248459 | 604  | + | 6985019 | COG49075   | hypothetical protein Spy49_0238                                                |
| Spy49_0239  | bacA   | NE | 248637 | 249476 | 279  | + | 6985020 | COG1968V   | undecaprenyl pyrophosphate phosphatase                                         |
| Spy49_0240  | mecA   | NE | 249622 | 250383 | 283  | + | 6985021 | COG48620TN | adaptor protein                                                                |
| Spy49_0241  | rgpG   | E  | 250390 | 251559 | 359  | + | 6985022 | COG0472M   | undecaprenyl-phosphate N-acetylglucosaminyl 1- phosphate transferase           |
| Spy49_0242  | -      | NC | 251681 | 252451 | 256  | + | 6985023 | COG03960   | iron-sulfur cluster assembly ATPase SufC                                       |
| Spy49_0243  | -      | C  | 252546 | 253808 | 420  | + | 6985024 | COG07190   | iron-sulfur cluster assembly protein SufD                                      |
| Spy49_0244  | -      | NC | 253839 | 255065 | 408  | + | 6985025 | COG0520E   | cysteine desulfurase                                                           |
| Spy49_0245  | -      | NC | 255052 | 255531 | 159  | + | 6985026 | COG0822C   | iron-sulfur cluster assembly scaffold protein IscU                             |
| Spy49_0246  | -      | NC | 255524 | 256942 | 472  | + | 6985027 | COG07190   | iron-sulfur cluster assembly protein SufB                                      |
| Spy49_0247  | pbp7   | NE | 257094 | 258275 | 393  | - | 6985028 | COG1686M   | D-alanyl-D-alanine carboxypeptidase                                            |
| Spy49_0248c | dacA   | NE | 258489 | 259676 | 395  | - | 6985029 | COG1686M   | Penicillin-binding protein 7                                                   |
| Spy49_0249  | oppA   | NE | 260007 | 261977 | 656  | + | 6985030 | COG4166E   | peptide ABC transporter substrate-binding protein                              |
| Spy49_0250  | oppB   | NE | 262042 | 263544 | 500  | + | 6985031 | COG0601E   | peptide ABC transporter permease                                               |
| Spy49_0251  | oppC   | NE | 263544 | 264470 | 308  | + | 6985032 | COG1173E   | peptide ABC transporter permease                                               |
| Spy49_0252  | oppD   | NE | 264479 | 265549 | 356  | + | 6985033 | COG0444E   | peptide transport ATP-binding protein oppD                                     |
| Spy49_0253  | oppF   | NE | 265542 | 266465 | 307  | + | 6985034 | COG1123R   | peptide transport ATP-binding protein oppF                                     |
| Spy49_0254c | -      | NE | 266613 | 266852 | 79   | - | 6985035 | -          | transposase                                                                    |
| Spy49_0256  | comX1  | NE | 272853 | 273338 | 161  | + | 6985042 | -          | ComX1 Alternate Sigma Factor                                                   |
| Spy49_0257  | -      | C  | 273839 | 274423 | 194  | + | 6985043 | COG2179R   | hypothetical protein Spy49_0257                                                |
| Spy49_0258  | -      | E  | 274423 | 275544 | 373  | + | 6985044 | COG1161R   | GTP-binding protein YqeH                                                       |
| Spy49_0259  | -      | NE | 275569 | 275877 | 102  | + | 6985045 | COG1534J   | hypothetical protein Spy49_0259                                                |
| Spy49_0260  | nadD   | NC | 275946 | 276578 | 210  | + | 6985046 | COG1057H   | nicotinic acid mononucleotide adenylyltransferase                              |
| Spy49_0261  | -      | NE | 276575 | 277168 | 197  | + | 6985047 | COG1713H   | hypothetical protein Spy49_0261                                                |
| Spy49_0262  | -      | NE | 277168 | 277545 | 125  | + | 6985048 | COG07995   | hypothetical protein Spy49_0262                                                |
| Spy49_0263  | -      | NE | 277593 | 278336 | 247  | + | 6985049 | COG2226H   | ubiquinone/menaquinone biosynthesis methyltransferase UbiE/COO5                |
| Spy49_0264  | -      | NE | 278558 | 279664 | 368  | + | 6985050 | COG1323R   | hypothetical protein Spy49_0264                                                |
| Spy49_0265  | -      | NE | 280146 | 280862 | 238  | + | 6985051 | COG02175   | hypothetical protein Spy49_0265                                                |
| Spy49_0266  | atmA   | NC | 281260 | 281907 | 215  | + | 6985052 | COG0834E   | ABC transporter substrate-binding protein                                      |
| Spy49_0268  | atmB   | NE | 282234 | 283079 | 281  | + | 6985053 | COG1464P   | methionine ABC transporter substrate-binding protein                           |
| Spy49_0269  | atmD   | NE | 283329 | 284393 | 354  | + | 6985054 | COG1135P   | ABC transporter                                                                |
| Spy49_0270  | atmE   | NE | 284394 | 285086 | 230  | + | 6985055 | COG2011P   | methionine ABC transporter permease                                            |
| Spy49_0271c | braB   | NE | 285140 | 286474 | 444  | + | 6985056 | COG1114E   | branched-chain amino acid ABC transporter                                      |
| Spy49_0272  | -      | NE | 286820 | 287959 | 379  | + | 6985057 | COG3633E   | serine/threonine transporter SstT                                              |
| Spy49_0273c | -      | E  | 288014 | 288688 | 224  | - | 6985058 | COG0569P   | potassium uptake protein, Trk family                                           |
| Spy49_0274c | -      | E  | 288698 | 290089 | 463  | - | 6985059 | COG0168P   | V-type Na <sup>+</sup> -ATPase subunit J                                       |
| Spy49_0275  | gidB   | NE | 290158 | 290871 | 237  | - | 6985060 | COG0357M   | 16S rRNA methyltransferase GidB                                                |
| Spy49_0276  | lemA   | NE | 291021 | 291578 | 185  | + | 6985061 | COG17045   | cytoplasmic membrane protein                                                   |
| Spy49_0277  | htpX   | NE | 291625 | 292521 | 298  | + | 6985062 | COG05010   | heat shock protein HtpX                                                        |
| Spy49_0278  | -      | NE | 292755 | 293288 | 177  | + | 6985143 | COG1399R   | hypothetical protein Spy49_0278                                                |
| Spy49_0279  | csrR   | NC | 293555 | 294241 | 228  | + | 6985144 | COG0745TK  | Response regulator CsrR                                                        |
| Spy49_0280  | csrS   | E  | 294247 | 295749 | 500  | + | 6985145 | COG0642T   | transmembrane histidine kinase CsrS                                            |
| Spy49_0281  | nrdR   | C  | 295964 | 296458 | 164  | + | 6985146 | COG1327K   | NrdR family transcriptional regulator                                          |
| Spy49_0282  | dnaB   | E  | 296442 | 297617 | 391  | + | 6985147 | COG3611L   | chromosome replication initiation protein/membrane attachment protein          |
| Spy49_0283  | dnal   | E  | 297618 | 298520 | 300  | + | 6985148 | COG1484L   | primosomal protein Dnal                                                        |
| Spy49_0284  | engA   | E  | 298583 | 299893 | 436  | + | 6985149 | COG1160R   | GTP-binding protein EngA                                                       |
| Spy49_0285  | snf    | NC | 300100 | 303198 | 1032 | + | 6985150 | COG0553KL  | SNF helicase                                                                   |
| Spy49_0286  | -      | NE | 303442 | 304044 | 200  | + | 6985151 | -          | hypothetical protein Spy49_0286                                                |
| Spy49_0287  | murC   | E  | 304084 | 305412 | 442  | + | 6985152 | COG0773M   | UDP-N-acetylmuramate-L-alanine ligase                                          |
| Spy49_0288  | -      | NE | 305458 | 305940 | 160  | + | 6985153 | COG0456R   | arylalkylamine N-acetyltransferase                                             |
| Spy49_0289  | -      | NC | 306058 | 307626 | 522  | + | 6985154 | COG1559R   | aminodeoxychorismate lyase                                                     |
| Spy49_0290  | greA   | NC | 307651 | 308181 | 176  | + | 6985155 | COG0782K   | transcription elongation factor GreA                                           |
| Spy49_0291  | oxaA   | E  | 308800 | 309723 | 307  | - | 6985156 | COG0706U   | OxaA-like protein                                                              |
| Spy49_0292c | -      | NE | 309805 | 310083 | 92   | - | 6985157 | COG1254C   | acylphosphatase                                                                |
| Spy49_0293  | -      | NE | 310344 | 311081 | 245  | + | 6985158 | COG0566J   | rRNA methylase                                                                 |
| Spy49_0294  | -      | NC | 311120 | 311620 | 166  | + | 6985159 | COG1418R   | hypothetical protein Spy49_0294                                                |
| Spy49_0295  | -      | NC | 311635 | 312324 | 229  | + | 6985160 | COG0670R   | hypothetical protein Spy49_0295                                                |
| Spy49_0296  | -      | NC | 312502 | 312744 | 80   | + | 6985161 | COG37635   | hypothetical protein Spy49_0296                                                |
| Spy49_0297  | glr    | E  | 312922 | 313716 | 264  | + | 6985162 | COG0796M   | glutamate racemase                                                             |
| Spy49_0298  | -      | NE | 313713 | 314699 | 328  | + | 6985163 | COG0127F   | deoxyribonucleotide triphosphate pyrophosphatase/unknown domain fusion protein |
| Spy49_0299  | -      | NE | 314678 | 315199 | 173  | + | 6985164 | COG0622R   | hypothetical protein Spy49_0299                                                |
| Spy49_0300  | -      | NE | 315196 | 315657 | 153  | + | 6985165 | COG4109K   | CBS domain-containing protein                                                  |
| Spy49_0301  | xerD   | NE | 315654 | 316400 | 248  | + | 6985166 | COG4974L   | site-specific tyrosine recombinase XerD-like protein                           |
| Spy49_0302  | scpA   | NE | 316400 | 317104 | 234  | + | 6985167 | COG13545   | segregation and condensation protein A                                         |
| Spy49_0303  | scpB   | NE | 317101 | 317652 | 183  | + | 6985168 | COG1386K   | segregation and condensation protein B                                         |
| Spy49_0304  | rluB   | NE | 317773 | 318495 | 240  | + | 6985169 | COG1187J   | ribosomal large subunit pseudouridine synthase                                 |
| Spy49_0305  | -      | NE | 318495 | 318755 | 86   | + | 6985170 | COG07595   | hypothetical protein Spy49_0305                                                |
| Spy49_0306  | -      | NE | 318933 | 319481 | 182  | + | 6985171 | COG0219J   | rRNA methylase                                                                 |
| Spy49_0307  | -      | NE | 319792 | 320328 | 178  | + | 6985172 | COG36015   | riboflavin transporter YpaA                                                    |
| Spy49_0308  | -      | NE | 320553 | 321011 | 152  | + | 6985173 | COG0671I   | phosphatase, partial                                                           |
| Spy49_0309  | -      | NE | 321303 | 322223 | 306  | + | 6985174 | COG1242R   | hypothetical protein Spy49_0309                                                |
| Spy49_0310  | -      | NE | 322262 | 322816 | 184  | + | 6985175 | COG2265J   | hypothetical protein Spy49_0310                                                |
| Spy49_0311  | hlyX   | NE | 322950 | 324284 | 444  | + | 6985176 | COG1253R   | hemolysin                                                                      |
| Spy49_0312  | pfIC   | NE | 324290 | 325153 | 287  | + | 6985177 | COG11800   | pyruvate formate-lyase activating enzyme                                       |
| Spy49_0313  | -      | E  | 325284 | 326219 | 311  | + | 6985178 | COG1227C   | manganese-dependent inorganic pyrophosphatase                                  |
| Spy49_0314  | -      | NE | 326295 | 326948 | 217  | + | 6985179 | -          | hypothetical protein Spy49_0314                                                |
| Spy49_0315  | fhuG   | NE | 326993 | 328030 | 345  | - | 6985180 | COG0609P   | ferrichrome ABC transporter permease                                           |
| Spy49_0316  | fhuB1  | NE | 327991 | 329043 | 350  | - | 6985181 | COG0609P   | ferrichrome ABC transporter permease                                           |
| Spy49_0317c | fhuD   | NE | 329033 | 329965 | 310  | - | 6985182 | COG0614P   | ferrichrome ABC transporter substrate-binding protein                          |
| Spy49_0318  | fhuC1  | NE | 329991 | 330773 | 260  | - | 6985183 | COG1120PH  | ferrichrome transport ATP-binding protein fhuC                                 |
| Spy49_0319c | murE   | E  | 331019 | 332464 | 481  | - | 6985184 | COG0769M   | UDP-N-acetylmuramoylalanine-D-glutamate-L-lysine ligase                        |
| Spy49_0320  | -      | E  | 332552 | 334186 | 544  | + | 6985185 | COG2244R   | polysaccharide biosynthesis protein                                            |
| Spy49_0322  | upp    | NE | 334353 | 334982 | 209  | + | 6985186 | COG0035F   | uracil phosphoribosyltransferase                                               |
| Spy49_0323  | clpP   | E  | 335206 | 335796 | 196  | + | 6985187 | COG07400U  | ATP-dependent Clp protease proteolytic subunit                                 |
| Spy49_0325  | -      | NE | 336288 | 336563 | 91   | + | 6985188 | COG44715   | hypothetical protein Spy49_0325                                                |
| Spy49_0326  | tmk    | E  | 336812 | 337447 | 211  | + | 6985189 | COG0125F   | thymidylate kinase                                                             |
| Spy49_0327  | -      | E  | 337465 | 338340 | 291  | + | 6985190 | COG0470L   | DNA polymerase III subunit delta'                                              |
| Spy49_0328  | -      | NC | 338688 | 338849 | 53   | + | 6985191 | COG17745   | signal peptidase-like protein                                                  |
| Spy49_0329  | -      | C  | 339004 | 339327 | 107  | + | 6985192 | COG44675   | DNA replication initiation control protein YabA                                |
| Spy49_0330  | -      | C  | 339332 | 340195 | 287  | + | 6985193 | COG0313R   | tetrapyrrole methylase                                                         |
| Spy49_0331  | -      | NE | 340222 | 340614 | 130  | + | 6985194 | -          | hypothetical protein Spy49_0331                                                |
| Spy49_0332c | -      | NE | 340661 | 341290 | 209  | - | 6985195 | COG3142P   | copper homeostasis protein                                                     |
| Spy49_0333  | -      | NE | 341597 | 341953 | 118  | + | 6985196 | COG1393P   | arsenate reductase                                                             |
| Spy49_0334c | exoA   | NE | 342027 | 342938 | 393  | - | 6985197 | COG0708L   | 3-exo-deoxyribonuclease                                                        |
| Spy49_0335  | lctO   | NE | 343088 | 344269 | 393  | + | 6985198 | COG1304C   | lactate oxidase                                                                |
| Spy49_0336  | prtS   | NE | 344611 | 349476 | 1621 | + | 6985199 | COG14040   | cell envelope proteinase                                                       |
| Spy49_0337  | -      | NE | 350303 | 350956 | 217  | + | 6985200 | COG36195   | hypothetical protein Spy49_0337                                                |
| Spy49_0338  | metS   | E  | 351196 | 353196 | 666  | + | 6985201 | COG0143J   | methionyl-tRNA synthetase                                                      |
| Spy49_0339  | nrdF.2 | NE | 353694 | 354707 | 337  | + | 6985202 | COG0208F   | ribonucleotide-diphosphate reductase subunit beta                              |
| Spy49_0340  | nrdI   | NE | 354711 | 355199 | 162  | + | 6985203 | COG1780F   | ribonucleotide reductase stimulatory protein                                   |
| Spy49_0341  | nrdE.2 | NE | 355166 | 357346 | 726  | + | 6985204 | COG0209F   | ribonucleotide-diphosphate reductase subunit alpha                             |
| Spy49_0342c | -      | NE | 357508 | 358260 | 250  | - | 6985205 | COG5585T   | hypothetical protein Spy49_0342c                                               |
| Spy49_0343  | -      | NC | 358946 | 359164 | 72   | + | 6985206 | -          | hypothetical protein Spy49_0343                                                |
| Spy49_0344  | -      | NC | 359112 | 359315 | 67   | + | 6985207 | -          | hypothetical protein Spy49_0344                                                |

|             |      |    |        |        |      |   |         |            |                                                                                                            |
|-------------|------|----|--------|--------|------|---|---------|------------|------------------------------------------------------------------------------------------------------------|
| Spy49_0345c | -    | NE | 359568 | 359765 | 65   | - | 6985208 | COG3464L   | transposase                                                                                                |
| Spy49_0346c | -    | NE | 360026 | 360859 | 277  | - | 6985209 | COG3464L   | transposase, IS8mu2                                                                                        |
| Spy49_0347  | -    | NE | 361343 | 361612 | 89   | + | 6985210 | -          | hypothetical protein Spy49_0347                                                                            |
| Spy49_0348  | -    | NE | 362242 | 362646 | 134  | + | 6985211 | -          | hypothetical protein Spy49_0348                                                                            |
| Spy49_0349c | -    | NE | 363232 | 363621 | 129  | - | 6985212 | -          | hypothetical protein Spy49_0349c                                                                           |
| Spy49_0350c | -    | NE | 364340 | 365032 | 230  | - | 6985213 | -          | hypothetical protein Spy49_0350c                                                                           |
| Spy49_0351c | -    | NE | 365190 | 365372 | 60   | - | 6985214 | -          | hypothetical protein Spy49_0351c                                                                           |
| Spy49_0352c | -    | NE | 365511 | 365696 | 61   | - | 6985215 | -          | hypothetical protein Spy49_0352c                                                                           |
| Spy49_0353c | -    | NE | 365740 | 366108 | 122  | - | 6985216 | -          | hypothetical protein Spy49_0353c                                                                           |
| Spy49_0354c | -    | NC | 366083 | 366256 | 57   | - | 6985217 | -          | hypothetical protein Spy49_0354c                                                                           |
| Spy49_0355c | -    | NE | 366619 | 367032 | 137  | - | 6985218 | -          | hypothetical protein Spy49_0355c                                                                           |
| Spy49_0356c | -    | NE | 367138 | 367644 | 168  | - | 6985219 | -          | hypothetical protein Spy49_0356c                                                                           |
| Spy49_0357c | -    | NE | 367681 | 368010 | 109  | - | 6985220 | -          | hypothetical protein Spy49_0357c                                                                           |
| Spy49_0358c | -    | NE | 368000 | 368602 | 200  | - | 6985221 | -          | Prophage ps3 protein 07                                                                                    |
| Spy49_0359c | -    | NE | 368868 | 369134 | 88   | - | 6985222 | -          | hypothetical protein Spy49_0359c                                                                           |
| Spy49_0360c | -    | NE | 369315 | 369488 | 57   | - | 6985303 | -          | phage protein                                                                                              |
| Spy49_0361c | -    | NE | 369776 | 371464 | 562  | - | 6985304 | COG3378R   | DNA primase-phage associated                                                                               |
| Spy49_0362c | -    | NE | 371433 | 372290 | 285  | - | 6985305 | -          | replication protein                                                                                        |
| Spy49_0363c | -    | NE | 372434 | 372712 | 92   | - | 6985306 | -          | hypothetical protein Spy49_0363c                                                                           |
| Spy49_0364c | -    | NC | 372715 | 372828 | 37   | - | 6985307 | -          | hypothetical protein Spy49_0364c, partial                                                                  |
| Spy49_0365c | -    | NE | 373055 | 373249 | 64   | - | 6985308 | -          | hypothetical protein Spy49_0365c                                                                           |
| Spy49_0366c | -    | NE | 373246 | 373455 | 69   | - | 6985309 | -          | hypothetical protein Spy49_0366c                                                                           |
| Spy49_0367c | -    | NE | 373980 | 374228 | 82   | - | 6985310 | -          | hypothetical protein Spy49_0367c                                                                           |
| Spy49_0368c | -    | NE | 374244 | 374429 | 61   | - | 6985311 | COG1426S   | hypothetical protein Spy49_0368c                                                                           |
| Spy49_0369  | -    | E  | 374597 | 375265 | 222  | + | 6985312 | COG1396K   | phage-associated protein                                                                                   |
| Spy49_0370  | -    | NE | 375347 | 376492 | 381  | + | 6985313 | COG4974L   | integrase                                                                                                  |
| Spy49_0371  | -    | NE | 377362 | 377598 | 78   | + | 6985314 | -          | hypothetical protein Spy49_0371                                                                            |
| Spy49_0372  | fabG | NE | 377591 | 378289 | 232  | + | 6985315 | COG1028IQR | 3-ketoacyl-ACP reductase                                                                                   |
| Spy49_0373  | -    | NE | 378365 | 379324 | 319  | + | 6985316 | COG0673R   | hypothetical protein Spy49_0373                                                                            |
| Spy49_0374  | glpT | NE | 379657 | 380994 | 445  | + | 6985317 | COG2271G   | glycerol-3-phosphate transporter                                                                           |
| Spy49_0375  | glmU | E  | 381167 | 382549 | 460  | + | 6985318 | COG1207M   | bifunctional N-acetylglucosamine-1-phosphate uridylyltransferase/glucosamine-1-phosphate acetyltransferase |
| Spy49_0376  | -    | NE | 382580 | 383134 | 184  | + | 6985319 | COG0494LR  | ADP-ribose pyrophosphatase                                                                                 |
| Spy49_0377  | -    | NE | 383134 | 383385 | 83   | + | 6985320 | -          | hypothetical protein Spy49_0377                                                                            |
| Spy49_0378  | pfs  | NC | 383405 | 384100 | 231  | + | 6985321 | COG0775F   | 5'-methylthioadenosine/S-adenosylhomocysteine nucleosidase                                                 |
| Spy49_0379  | -    | NE | 384251 | 384592 | 113  | + | 6985322 | -          | hypothetical protein Spy49_0379                                                                            |
| Spy49_0380c | -    | NC | 384689 | 385336 | 215  | - | 6985323 | COG1321K   | metal-dependent transcriptional regulator                                                                  |
| Spy49_0381  | mtsA | NE | 385590 | 386414 | 274  | + | 6985324 | COG0803P   | Metal ABC transporter substrate-binding lipoprotein                                                        |
| Spy49_0382  | mtsB | NE | 386478 | 387203 | 241  | + | 6985325 | COG1121P   | ATP-binding protein MtsB                                                                                   |
| Spy49_0383  | mtsC | NE | 387204 | 388058 | 284  | + | 6985326 | COG1108P   | Integral membrane protein MtsC, ABC transporter                                                            |
| Spy49_0384c | cypB | NE | 388206 | 389012 | 268  | - | 6985327 | COG0652O   | cyclophilin-type protein                                                                                   |
| Spy49_0385  | ftsK | E  | 389229 | 391634 | 801  | + | 6985328 | COG1674D   | cell division protein FtsK                                                                                 |
| Spy49_0386c | -    | NE | 391704 | 392054 | 116  | - | 6985329 | -          | hypothetical protein Spy49_0386c                                                                           |
| Spy49_0387  | rplK | NC | 392301 | 392726 | 141  | + | 6985330 | COG0080J   | 50S ribosomal protein L11                                                                                  |
| Spy49_0388  | rplA | E  | 392832 | 393521 | 229  | + | 6985331 | COG0081J   | 50S ribosomal protein L1                                                                                   |
| Spy49_0390  | pyrH | E  | 393843 | 394571 | 242  | + | 6985332 | COG0528F   | uridylylase kinase                                                                                         |
| Spy49_0391  | frr  | E  | 394600 | 395157 | 185  | + | 6985333 | COG0233J   | ribosome recycling factor                                                                                  |
| Spy49_0392  | -    | NE | 395266 | 396123 | 285  | + | 6985334 | COG2996S   | S1 RNA binding domain                                                                                      |
| Spy49_0394  | mrsA | NE | 396196 | 396705 | 169  | + | 6985335 | COG0225O   | methionine sulfoxide reductase A                                                                           |
| Spy49_0395  | -    | NE | 396702 | 396917 | 71   | + | 6985336 | COG4479S   | hypothetical protein Spy49_0395                                                                            |
| Spy49_0396  | -    | NE | 397073 | 398242 | 389  | + | 6985337 | -          | 42 kDa protein                                                                                             |
| Spy49_0398  | -    | NE | 398517 | 400328 | 603  | + | 6985338 | COG4716S   | myosin-cross-reactive antigen                                                                              |
| Spy49_0399  | phoH | NE | 400487 | 401539 | 350  | + | 6985339 | COG1702T   | phosphate starvation-induced protein                                                                       |
| Spy49_0400  | -    | NE | 401585 | 402160 | 191  | + | 6985340 | COG1573L   | hypothetical protein Spy49_0400                                                                            |
| Spy49_0401  | -    | E  | 402319 | 402816 | 165  | + | 6985341 | COG0319R   | metalloprotease                                                                                            |
| Spy49_0402  | dgk  | E  | 402797 | 403204 | 135  | + | 6985342 | COG0818M   | Diaclylglycerol kinase                                                                                     |
| Spy49_0403  | era  | E  | 403324 | 404220 | 298  | + | 6985343 | COG1159R   | GTP-binding protein Era                                                                                    |
| Spy49_0404  | -    | NE | 404241 | 404717 | 158  | + | 6985344 | COG1051F   | hypothetical protein Spy49_0404                                                                            |
| Spy49_0405c | -    | NE | 405023 | 405277 | 84   | - | 6985345 | -          | hypothetical protein Spy49_0405c                                                                           |
| Spy49_0406  | -    | NE | 405910 | 406092 | 60   | + | 6985346 | -          | hypothetical protein Spy49_0406                                                                            |
| Spy49_0407c | -    | NC | 406430 | 406579 | 49   | - | 6985347 | COG3328L   | transposase                                                                                                |
| Spy49_0408c | -    | NE | 406576 | 406998 | 140  | - | 6985348 | COG3328L   | transposase for insertion sequence element IS905                                                           |
| Spy49_0409  | -    | NE | 407316 | 407543 | 75   | + | 6985349 | -          | bacteriocin                                                                                                |
| Spy49_0410  | -    | NE | 408295 | 408555 | 86   | + | 6985350 | -          | hypothetical protein Spy49_0410                                                                            |
| Spy49_0411  | -    | NE | 408771 | 409142 | 123  | + | 6985351 | -          | hypothetical protein Spy49_0411                                                                            |
| Spy49_0412  | -    | NC | 409427 | 410494 | 355  | + | 6985352 | -          | hypothetical protein Spy49_0412                                                                            |
| Spy49_0413  | -    | NE | 410587 | 410985 | 132  | + | 6985353 | -          | hypothetical protein Spy49_0413                                                                            |
| Spy49_0414c | -    | NE | 411333 | 411602 | 89   | - | 6985354 | -          | hypothetical protein Spy49_0414c                                                                           |
| Spy49_0415  | mutR | NE | 412673 | 413539 | 288  | + | 6985355 | -          | positive transcriptional regulator                                                                         |
| Spy49_0416  | fdg  | NE | 413711 | 414538 | 275  | + | 6985356 | COG0266L   | formamidopyrimidine-DNA glycosylase                                                                        |
| Spy49_0417  | coaE | E  | 414517 | 415128 | 203  | + | 6985357 | COG0237H   | dephospho-CoA kinase                                                                                       |
| Spy49_0418  | -    | NC | 415318 | 416820 | 500  | + | 6985358 | COG0433R   | hypothetical protein Spy49_0418                                                                            |
| Spy49_0419  | -    | NE | 416942 | 418135 | 397  | + | 6985359 | COG2814G   | multidrug resistance efflux pump                                                                           |
| Spy49_0420  | rpmG | NC | 418132 | 418278 | 48   | + | 6985360 | COG0267J   | 50S ribosomal protein L33                                                                                  |
| Spy49_0421  | secG | NC | 418324 | 418560 | 78   | + | 6985361 | -          | preprotein translocase subunit SecG                                                                        |
| Spy49_0422  | vacB | NC | 418654 | 420987 | 777  | + | 6985362 | COG0557K   | exoribonuclease R                                                                                          |
| Spy49_0423  | smfB | NC | 420990 | 421457 | 155  | + | 6985363 | COG0691O   | SsrA-binding protein                                                                                       |
| Spy49_0424  | -    | NE | 421472 | 422182 | 236  | + | 6985364 | COG3823O   | glutamine cyclotransferase                                                                                 |
| Spy49_0425c | pcp  | NE | 422300 | 422947 | 215  | - | 6985365 | COG2039O   | pyrrolidone-carboxylate peptidase                                                                          |
| Spy49_0426c | -    | NE | 422998 | 423924 | 308  | - | 6985366 | COG3817S   | hypothetical protein Spy49_0426c                                                                           |
| Spy49_0427c | -    | NE | 423924 | 424607 | 227  | - | 6985367 | COG3819S   | hypothetical protein Spy49_0427c                                                                           |
| Spy49_0428c | -    | NE | 424818 | 425744 | 308  | - | 6985368 | COG0463M   | sugar transferase                                                                                          |
| Spy49_0429c | gloA | NE | 425889 | 426266 | 125  | - | 6985369 | COG0346E   | lactoylglutathione lyase                                                                                   |
| Spy49_0430c | -    | NE | 426277 | 426942 | 221  | - | 6985370 | COG0778C   | NAD(P)H-flavin oxidoreductase                                                                              |
| Spy49_0431c | pepQ | NE | 426991 | 428076 | 361  | - | 6985371 | COG0006E   | Xaa-Pro dipeptidase                                                                                        |
| Spy49_0432  | ccpA | E  | 428250 | 429251 | 333  | + | 6985372 | COG1609K   | Catabolite control protein A                                                                               |
| Spy49_0433  | -    | E  | 429382 | 430380 | 332  | + | 6985373 | COG0438M   | sugar transferase                                                                                          |
| Spy49_0434  | -    | E  | 430382 | 431716 | 444  | + | 6985374 | COG0438M   | glucosyl transferase                                                                                       |
| Spy49_0435  | thrS | E  | 432138 | 434081 | 647  | + | 6985375 | COG0441J   | threonyl-tRNA synthetase                                                                                   |
| Spy49_0436  | tagH | NE | 434222 | 435214 | 330  | + | 6985376 | COG4586R   | Teichoic acid export ATP-binding protein tagH                                                              |
| Spy49_0437  | -    | NE | 435216 | 436034 | 272  | + | 6985377 | COG4587R   | hypothetical protein Spy49_0437                                                                            |
| Spy49_0438  | -    | NE | 436036 | 436821 | 261  | + | 6985378 | COG3694R   | hypothetical protein Spy49_0438                                                                            |
| Spy49_0439  | -    | NC | 437022 | 437171 | 49   | + | 6985379 | -          | dihydroxyacetone kinase                                                                                    |
| Spy49_0440  | -    | NE | 437566 | 438714 | 382  | + | 6985380 | COG0183I   | acetyl-CoA acetyltransferase                                                                               |
| Spy49_0441  | -    | NE | 438671 | 439918 | 415  | + | 6985381 | COG0318IQ  | Long-chain-fatty-acid-CoA ligase                                                                           |
| Spy49_0442  | -    | NE | 439974 | 441008 | 344  | + | 6985382 | -          | hypothetical protein Spy49_0442                                                                            |
| Spy49_0444  | vicR | E  | 441170 | 441880 | 236  | + | 6985463 | COG0745TK  | two-component response regulator                                                                           |
| Spy49_0445  | vicK | NE | 441873 | 443225 | 450  | + | 6985464 | COG5002T   | two-component sensor histidine kinase                                                                      |
| Spy49_0446  | vicX | NE | 443229 | 444038 | 269  | + | 6985465 | COG1235R   | Zn-dependent hydrolase                                                                                     |
| Spy49_0447  | rnc  | NC | 444483 | 445175 | 230  | + | 6985466 | COG0571K   | ribonuclease III                                                                                           |
| Spy49_0448  | smc  | NC | 445176 | 448715 | 1179 | + | 6985467 | COG1196D   | chromosome segregation SMC                                                                                 |
| Spy49_0449c | -    | NE | 448963 | 449814 | 283  | - | 6985468 | -          | positive regulator                                                                                         |
| Spy49_0450  | aroE | NE | 450088 | 450960 | 290  | + | 6985469 | COG0169E   | shikimate 5-dehydrogenase                                                                                  |
| Spy49_0451  | -    | NE | 450957 | 451793 | 278  | + | 6985470 | COG1082G   | hypothetical protein Spy49_0451                                                                            |
| Spy49_0453  | -    | NC | 451795 | 452529 | 244  | + | 6985471 | COG1478S   | hypothetical protein Spy49_0453                                                                            |
| Spy49_0454  | -    | NE | 452522 | 453508 | 328  | + | 6985472 | COG0673R   | hypothetical protein Spy49_0454                                                                            |
| Spy49_0455  | -    | NE | 453518 | 454717 | 399  | + | 6985473 | COG1812E   | S-adenosylmethionine synthetase                                                                            |
| Spy49_0456  | -    | NE | 454701 | 455603 | 300  | + | 6985474 | COG1493T   | hypothetical protein Spy49_0456                                                                            |



|             |        |    |        |        |      |   |         |            |                                                                                |
|-------------|--------|----|--------|--------|------|---|---------|------------|--------------------------------------------------------------------------------|
| Spy49_0457  | -      | NE | 455724 | 456713 | 329  | + | 6985475 | COG0463M   | hypothetical protein Spy49_0457                                                |
| Spy49_0458  | -      | NE | 457116 | 457382 | 88   | - | 6985476 | -          | hypothetical protein Spy49_0458                                                |
| Spy49_0459  | -      | NE | 457406 | 458563 | 385  | + | 6985477 | COG1004M   | UDP-glucose dehydrogenase                                                      |
| Spy49_0460  | -      | NE | 458648 | 459817 | 389  | + | 6985478 | -          | efflux protein                                                                 |
| Spy49_0461c | -      | NE | 459958 | 460167 | 69   | - | 6985479 | COG3655K   | hypothetical protein Spy49_0461c                                               |
| Spy49_0462c | -      | NE | 460157 | 461815 | 552  | - | 6985480 | -          | hypothetical protein Spy49_0462c                                               |
| Spy49_0463c | -      | NE | 461806 | 462030 | 74   | - | 6985481 | -          | hypothetical protein Spy49_0463c                                               |
| Spy49_0464c | -      | NE | 462034 | 462924 | 296  | - | 6985482 | -          | hypothetical protein Spy49_0464c                                               |
| Spy49_0465  | -      | NC | 462958 | 463116 | 52   | + | 6985483 | -          | hypothetical protein Spy49_0465                                                |
| Spy49_0466  | -      | NE | 463171 | 463473 | 100  | + | 6985484 | COG3077L   | hypothetical protein Spy49_0466                                                |
| Spy49_0467  | -      | NE | 463602 | 463778 | 58   | + | 6985485 | -          | hypothetical protein Spy49_0467, partial                                       |
| Spy49_0468  | -      | NE | 464174 | 464626 | 150  | + | 6985486 | COG4695S   | Portal protein                                                                 |
| Spy49_0469  | -      | NE | 464692 | 465000 | 102  | + | 6985487 | -          | hypothetical protein Spy49_0469                                                |
| Spy49_0470c | -      | NE | 465238 | 465426 | 62   | - | 6985488 | -          | hypothetical protein Spy49_0470c                                               |
| Spy49_0471  | -      | NE | 465417 | 465740 | 107  | + | 6985489 | COG3177S   | hypothetical protein Spy49_0471                                                |
| Spy49_0473  | -      | NE | 465785 | 466456 | 223  | + | 6985490 | COG0017J   | asparagine synthetase A                                                        |
| Spy49_0474  | -      | NE | 466617 | 467864 | 415  | + | 6985491 | COG0439I   | hypothetical protein Spy49_0474                                                |
| Spy49_0475  | -      | NE | 468092 | 468808 | 238  | + | 6985492 | COG1619V   | Microcin C7 self-immunity protein mccF                                         |
| Spy49_0476  | -      | NE | 468984 | 469943 | 319  | + | 6985493 | COG0124J   | hypothetical protein Spy49_0476                                                |
| Spy49_0477c | -      | NE | 470313 | 471116 | 267  | - | 6985494 | COG2801L   | transposase                                                                    |
| Spy49_0478c | -      | NE | 471164 | 471439 | 91   | - | 6985495 | COG2963L   | transposase OrfA, IS3 family                                                   |
| Spy49_0479  | -      | NE | 471459 | 471677 | 72   | + | 6985496 | -          | hypothetical protein Spy49_0479                                                |
| Spy49_0480  | -      | NE | 471744 | 472541 | 265  | + | 6985497 | COG0561R   | hypothetical protein Spy49_0480                                                |
| Spy49_0481  | -      | NE | 472545 | 473369 | 274  | + | 6985498 | COG0561R   | hypothetical protein Spy49_0481                                                |
| Spy49_0482  | ftsY   | E  | 473369 | 474919 | 515  | + | 6985499 | COG0552U   | signal recognition particle receptor protein FtsY subunit alpha                |
| Spy49_0483c | -      | NE | 474973 | 476340 | 456  | + | 6985500 | COG2814G   | drug resistance protein                                                        |
| Spy49_0484  | bgIG   | NE | 476668 | 477510 | 280  | + | 6985501 | COG3711K   | transcription antiterminator                                                   |
| Spy49_0485  | -      | NE | 477512 | 479374 | 620  | + | 6985502 | COG1263G   | beta-glucoside permease IIABC component                                        |
| Spy49_0487  | bgIA   | NE | 479393 | 480817 | 474  | + | 6985503 | COG2723G   | beta-glucosidase                                                               |
| Spy49_0488c | -      | NE | 480916 | 481731 | 271  | - | 6985504 | COG3689S   | hypothetical protein Spy49_0488c                                               |
| Spy49_0489c | -      | NE | 481731 | 482633 | 300  | - | 6985505 | COG0701R   | hypothetical protein Spy49_0489c                                               |
| Spy49_0490  | -      | NE | 483170 | 485302 | 710  | + | 6985506 | COG2183K   | hypothetical protein Spy49_0490                                                |
| Spy49_0491  | -      | NE | 485244 | 485726 | 160  | + | 6985507 | COG3091S   | hypothetical protein Spy49_0491                                                |
| Spy49_0493  | -      | NE | 485790 | 486062 | 90   | + | 6985508 | COG1983KT  | hypothetical protein Spy49_0493                                                |
| Spy49_0494  | ptsK   | E  | 486367 | 487359 | 330  | + | 6985509 | COG1493T   | HPr kinase/phosphorylase                                                       |
| Spy49_0495  | lgt    | NE | 487356 | 488135 | 259  | + | 6985510 | COG0682M   | prolipoprotein diacylglycerol transferase                                      |
| Spy49_0496  | -      | NE | 488157 | 488564 | 135  | + | 6985511 | COG4768R   | hypothetical protein Spy49_0496                                                |
| Spy49_0497  | -      | NE | 488557 | 488985 | 142  | + | 6985512 | -          | hypothetical protein Spy49_0497                                                |
| Spy49_0498  | -      | NE | 489044 | 489313 | 89   | + | 6985513 | -          | hypothetical protein Spy49_0498                                                |
| Spy49_0499  | -      | NE | 489631 | 490557 | 308  | + | 6985514 | COG0826O   | protease                                                                       |
| Spy49_0500  | -      | NE | 490659 | 491945 | 428  | + | 6985515 | COG0826O   | protease                                                                       |
| Spy49_0501  | -      | NE | 492146 | 492373 | 75   | + | 6985516 | COG4443S   | hypothetical protein Spy49_0501                                                |
| Spy49_0502c | -      | NC | 492470 | 492610 | 46   | - | 6985517 | -          | hypothetical protein Spy49_0502c                                               |
| Spy49_0503c | lysS   | E  | 492746 | 494239 | 497  | - | 6985518 | COG1190J   | lysyl-tRNA synthetase                                                          |
| Spy49_0504  | -      | NE | 494413 | 495315 | 300  | + | 6985519 | COG1011R   | hypothetical protein Spy49_0504                                                |
| Spy49_0505c | -      | NE | 495423 | 496046 | 207  | - | 6985520 | COG0406G   | phosphoglycerate mutase                                                        |
| Spy49_0506c | -      | NE | 496387 | 496866 | 159  | - | 6985521 | COG2606S   | transcription regulator                                                        |
| Spy49_0507c | -      | NE | 496957 | 497520 | 187  | - | 6985522 | COG3859S   | thiamin transporter                                                            |
| Spy49_0508c | -      | NE | 497789 | 498637 | 282  | - | 6985523 | COG3757M   | endolysin, phage associated                                                    |
| Spy49_0509  | -      | NE | 498962 | 499465 | 167  | + | 6985524 | -          | ABC transporter permease                                                       |
| Spy49_0510  | -      | NE | 499449 | 499835 | 128  | + | 6985525 | -          | hypothetical protein Spy49_0510                                                |
| Spy49_0511c | -      | NE | 499881 | 500360 | 159  | - | 6985526 | COG0386O   | glutathione peroxidase                                                         |
| Spy49_0512c | pepF   | NE | 500353 | 502152 | 599  | - | 6985527 | COG1164E   | oligoendopeptidase F                                                           |
| Spy49_0513  | ppc    | NE | 502311 | 505109 | 932  | + | 6985528 | COG2352C   | phosphoenolpyruvate carboxylase                                                |
| Spy49_0514  | ftsW   | E  | 505279 | 506187 | 302  | + | 6985529 | COG0772D   | cell division protein FtsW                                                     |
| Spy49_0515  | tufA   | NC | 506912 | 508108 | 398  | + | 6985530 | COG0050J   | elongation factor Tu                                                           |
| Spy49_0516  | tpiA   | E  | 508349 | 509107 | 252  | + | 6985531 | COG0149G   | triosephosphate isomerase                                                      |
| Spy49_0517c | murN   | E  | 509207 | 510442 | 411  | - | 6985532 | COG2348V   | peptidoglycan branched peptide synthesis protein, alanine adding enzyme        |
| Spy49_0518c | murM.1 | E  | 510429 | 511655 | 408  | - | 6985533 | COG2348V   | peptidoglycan branched peptide synthesis protein, serine/alanine adding enzyme |
| Spy49_0519c | -      | NE | 511655 | 512464 | 269  | - | 6985534 | COG0561R   | hypothetical protein Spy49_0519c                                               |
| Spy49_0520c | -      | NE | 512920 | 514221 | 433  | - | 6985535 | COG1078R   | HD domain-containing protein                                                   |
| Spy49_0521  | -      | NE | 514303 | 514689 | 128  | + | 6985536 | COG4506S   | hypothetical protein Spy49_0521                                                |
| Spy49_0522  | pacL   | E  | 514920 | 517601 | 893  | + | 6985537 | COG0474P   | calcium-transporting ATPase                                                    |
| Spy49_0523c | regR   | NE | 517687 | 518682 | 331  | - | 6985538 | COG1609K   | transcriptional regulator                                                      |
| Spy49_0524c | -      | NE | 518746 | 520653 | 635  | - | 6985539 | -          | hypothetical protein Spy49_0524c                                               |
| Spy49_0525c | agaD   | NC | 520740 | 521561 | 273  | - | 6985540 | COG3716G   | PTS dependent galactosamine IID component                                      |
| Spy49_0526c | agaW   | NE | 521548 | 522330 | 160  | - | 6985541 | COG3715G   | PTS dependent N-acetyl-galactosamine- IIC component                            |
| Spy49_0527c | agaV   | NE | 522349 | 522837 | 262  | - | 6985542 | COG3444G   | PTS system IIB component                                                       |
| Spy49_0528c | ugl    | NE | 522873 | 524072 | 399  | - | 6985543 | COG4225R   | glucuronyl hydrolase                                                           |
| Spy49_0529c | agaF   | NE | 524072 | 524509 | 145  | - | 6985544 | COG2893G   | PTS dependent N-acetyl-galactosamine- and galactosamine IIA component          |
| Spy49_0530  | -      | NE | 524844 | 525638 | 264  | + | 6985545 | COG1028IQR | gluconate 5-dehydrogenase                                                      |
| Spy49_0531  | -      | NE | 525663 | 526304 | 213  | + | 6985546 | COG0698G   | hypothetical protein Spy49_0531                                                |
| Spy49_0532  | kdgK   | NE | 526333 | 527334 | 333  | + | 6985547 | COG0524G   | 2-dehydro-3-deoxygluconokinase                                                 |
| Spy49_0533  | kdgA   | NE | 527339 | 527974 | 211  | + | 6985548 | COG0800G   | keto-hydroxyglutarate-aldolase/keto-deoxy-phosphogluconate aldolase            |
| Spy49_0534  | -      | NE | 528272 | 528922 | 216  | + | 6985549 | COG0637R   | hypothetical protein Spy49_0534                                                |
| Spy49_0535  | -      | NE | 529618 | 530742 | 374  | + | 6985550 | COG1600C   | hypothetical protein Spy49_0535                                                |
| Spy49_0536  | prfB   | E  | 530928 | 531908 | 326  | + | 6985551 | COG1186J   | peptide chain release factor 2                                                 |
| Spy49_0537  | ftsE   | NC | 531927 | 532619 | 230  | + | 6985552 | COG2884D   | cell division transporter ATP-binding protein ftsE                             |
| Spy49_0538  | ftsX   | E  | 532612 | 533541 | 309  | + | 6985553 | COG2177D   | cell division protein FtsX                                                     |
| Spy49_0539c | -      | NE | 533851 | 534429 | 192  | - | 6985554 | COG0491R   | oxacylglutathione hydrolase                                                    |
| Spy49_0540  | -      | NE | 534718 | 535482 | 254  | + | 6985555 | COG1028IQR | acetoin reductase                                                              |
| Spy49_0541  | dinG   | NE | 535590 | 538091 | 833  | + | 6985556 | COG1199KL  | bifunctional ATP-dependent DNA helicase/DNA polymerase III subunit epsilon     |
| Spy49_0543  | aspC   | NE | 538426 | 539619 | 397  | + | 6985557 | COG0436E   | aspartate aminotransferase                                                     |
| Spy49_0544  | asnC   | E  | 539640 | 540986 | 448  | + | 6985558 | COG0017J   | asparaginyl-tRNA synthetase                                                    |
| Spy49_0545  | -      | E  | 541401 | 542291 | 296  | + | 6985559 | COG1660R   | hypothetical protein Spy49_0545                                                |
| Spy49_0546  | -      | NE | 542288 | 543265 | 325  | + | 6985560 | COG0391S   | hypothetical protein Spy49_0546                                                |
| Spy49_0547  | -      | NE | 543262 | 544173 | 303  | + | 6985561 | COG1481S   | hypothetical protein Spy49_0547                                                |
| Spy49_0548  | pepD   | NE | 544306 | 545703 | 465  | + | 6985562 | COG4690E   | dipeptidase A                                                                  |
| Spy49_0549  | adcA   | NE | 545855 | 547402 | 515  | + | 6985563 | COG3443R   | zinc-binding protein adcA                                                      |
| Spy49_0550  | -      | NE | 547552 | 548274 | 240  | + | 6985564 | COG2188K   | Gntr family transcriptional regulator                                          |
| Spy49_0551  | agaS   | NE | 548294 | 549493 | 399  | + | 6985565 | COG2222M   | tagatose-6-phosphate aldolase/ketose isomerase                                 |
| Spy49_0552c | rpmE2  | NC | 549590 | 549850 | 86   | - | 6985566 | COG0254J   | 50S ribosomal protein L31 type B                                               |
| Spy49_0554c | -      | NE | 549965 | 550906 | 313  | - | 6985567 | COG0618R   | hypothetical protein Spy49_0554c                                               |
| Spy49_0555  | flaV   | NE | 551300 | 551749 | 149  | + | 6985568 | COG0716C   | flavodoxin                                                                     |
| Spy49_0556  | -      | NC | 551925 | 552209 | 94   | + | 6985569 | COG1605E   | hypothetical protein Spy49_0556                                                |
| Spy49_0557  | -      | C  | 552202 | 553464 | 420  | + | 6985570 | COG0038P   | transmembrane protein                                                          |
| Spy49_0558  | rplS   | NC | 553579 | 553926 | 115  | + | 6985571 | COG0335J   | 50S ribosomal protein L19                                                      |
| Spy49_0559  | -      | NE | 554947 | 555516 | 189  | + | 6985572 | COG0546R   | phosphoglycolate phosphatase                                                   |
| Spy49_0560  | gyrB   | E  | 555517 | 557469 | 650  | + | 6985574 | COG0187L   | DNA gyrase subunit B                                                           |
| Spy49_0561  | ezrA   | E  | 557837 | 559561 | 574  | + | 6985575 | COG4477D   | septation ring formation regulator EzrA                                        |
| Spy49_0562c | -      | NE | 559693 | 560151 | 152  | - | 6985576 | COG5506S   | hypothetical protein Spy49_0562c                                               |
| Spy49_0563  | eno    | E  | 560384 | 561691 | 435  | + | 6985577 | COG0148G   | phosphopyruvate hydratase                                                      |
| Spy49_0564c | -      | NE | 562280 | 562855 | 191  | - | 6985578 | COG3547L   | transposase                                                                    |
| Spy49_0565c | -      | NC | 562941 | 563102 | 53   | - | 6985579 | -          | transposase                                                                    |
| Spy49_0566c | -      | NE | 563464 | 565005 | 513  | - | 6985580 | -          | RofA family transcriptional regulator                                          |
| Spy49_0567  | -      | NC | 565552 | 568944 | 1130 | + | 6985581 | -          | extracellular matrix binding protein                                           |
| Spy49_0568  | sagA   | NE | 568909 | 569970 | 53   | + | 6985582 | -          | streptolysin S associated protein SagA                                         |

|             |        |    |        |        |      |   |         |           |                                                                                  |
|-------------|--------|----|--------|--------|------|---|---------|-----------|----------------------------------------------------------------------------------|
| Spy49_0569  | sagB   | NE | 570192 | 571142 | 316  | + | 6985583 | -         | streptolysin S biosynthesis protein B SagB                                       |
| Spy49_0570  | sagC   | NE | 571139 | 572197 | 352  | + | 6985584 | -         | streptolysin S biosynthesis protein C SagC                                       |
| Spy49_0572  | sagD   | NE | 572217 | 573575 | 452  | + | 6985585 | COG19445  | streptolysin S biosynthesis protein D SagD                                       |
| Spy49_0573  | sagE   | NE | 573550 | 574221 | 223  | + | 6985586 | -         | streptolysin S self-immunity protein SagE                                        |
| Spy49_0574  | sagF   | NE | 574218 | 574901 | 227  | + | 6985587 | -         | streptolysin S biosynthesis protein SagF                                         |
| Spy49_0575  | sagG   | C  | 574924 | 575847 | 307  | + | 6985588 | COG1131V  | streptolysin S export ATP-binding protein SagG                                   |
| Spy49_0576  | sagH   | NC | 575856 | 576983 | 375  | + | 6985589 | COG0842V  | streptolysin S export transmembrane protein SagH                                 |
| Spy49_0577  | sagI   | C  | 576980 | 578098 | 372  | + | 6985590 | COG0842V  | streptolysin S export transmembrane protein SagI                                 |
| Spy49_0578  | -      | NE | 578669 | 581401 | 910  | + | 6985591 | COG2374R  | endonuclease/exonuclease/phosphatase                                             |
| Spy49_0579  | -      | NE | 581679 | 582179 | 166  | + | 6985592 | COG4708S  | hypothetical protein Spy49_0579                                                  |
| Spy49_0580  | ligA   | E  | 582373 | 584331 | 652  | + | 6985593 | COG0272L  | NAD-dependent DNA ligase LigA                                                    |
| Spy49_0581  | -      | E  | 584345 | 585367 | 340  | + | 6985594 | COG15971R | lipid kinase                                                                     |
| Spy49_0582  | -      | NC | 585762 | 585959 | 65   | + | 6985595 | COG0636C  | F0F1 ATP synthase subunit C                                                      |
| Spy49_0583  | -      | E  | 585994 | 586710 | 238  | + | 6985596 | COG0356C  | F0F1 ATP synthase subunit A                                                      |
| Spy49_0584  | -      | NC | 586728 | 587222 | 164  | + | 6985597 | COG0711C  | F0F1 ATP synthase subunit B                                                      |
| Spy49_0585  | -      | E  | 587222 | 587758 | 178  | + | 6985598 | COG0712C  | F0F1 ATP synthase subunit delta                                                  |
| Spy49_0586  | -      | E  | 587774 | 589282 | 502  | + | 6985599 | COG0056C  | F0F1 ATP synthase subunit alpha                                                  |
| Spy49_0587  | -      | E  | 589298 | 590173 | 291  | + | 6985600 | COG0224C  | F0F1 ATP synthase subunit gamma                                                  |
| Spy49_0588  | -      | E  | 590335 | 591741 | 468  | + | 6985601 | COG0055C  | F0F1 ATP synthase subunit beta                                                   |
| Spy49_0589  | atpC   | NC | 591754 | 592170 | 138  | + | 6985602 | COG0355C  | F0F1 ATP synthase subunit epsilon                                                |
| Spy49_0590  | -      | NE | 592436 | 592693 | 85   | + | 6985603 | -         | hypothetical protein Spy49_0590                                                  |
| Spy49_0591  | murA   | NE | 592758 | 594029 | 423  | + | 6985604 | COG0766M  | UDP-N-acetylglucosamine 1-carboxyvinyltransferase                                |
| Spy49_0592  | -      | NE | 594033 | 594221 | 62   | + | 6985605 | -         | hypothetical protein Spy49_0592                                                  |
| Spy49_0596  | pheS   | E  | 595077 | 596120 | 347  | + | 6985608 | COG0016J  | phenylalanyl-tRNA synthetase subunit alpha                                       |
| Spy49_0597  | pheT   | E  | 596330 | 598735 | 801  | + | 6985609 | COG0072J  | phenylalanyl-tRNA synthetase subunit beta                                        |
| Spy49_0598  | -      | NE | 598845 | 599222 | 125  | + | 6985610 | -         | hypothetical protein Spy49_0598                                                  |
| Spy49_0599  | -      | NE | 599215 | 599601 | 128  | + | 6985611 | COG3272S  | hypothetical protein Spy49_0599                                                  |
| Spy49_0600  | -      | NE | 599674 | 600750 | 358  | + | 6985612 | -         | hypothetical protein Spy49_0600                                                  |
| Spy49_0601  | -      | NE | 600760 | 601428 | 222  | + | 6985613 | COG1136V  | ABC transporter ATP-binding protein                                              |
| Spy49_0602c | -      | NE | 601532 | 602449 | 305  | - | 6985614 | COG2321R  | hypothetical protein Spy49_0602c                                                 |
| Spy49_0603  | rexB   | C  | 602600 | 605815 | 1071 | + | 6985615 | COG3857L  | ATP-dependent exonuclease subunit B                                              |
| Spy49_0604  | rexA   | E  | 605776 | 609444 | 1222 | + | 6985616 | COG1074L  | ATP-dependent exonuclease subunit A                                              |
| Spy49_0605  | -      | NE | 609584 | 610204 | 206  | + | 6985617 | COG0834E  | ABC transporter                                                                  |
| Spy49_0606  | rpsU   | NC | 610543 | 610719 | 58   | + | 6985618 | COG0828J  | 30S ribosomal protein S21p                                                       |
| Spy49_0607c | muscL  | NE | 610847 | 611209 | 120  | - | 6985619 | COG1970M  | large conductance mechanosensitive channel                                       |
| Spy49_0608  | dnaG   | E  | 611339 | 613153 | 604  | + | 6985620 | COG0358L  | DNA primase                                                                      |
| Spy49_0609  | rpoD   | E  | 613162 | 614271 | 369  | + | 6985621 | COG0568K  | RNA polymerase sigma factor RpoD                                                 |
| Spy49_0610  | -      | NE | 614507 | 614845 | 112  | + | 6985622 | COG2151R  | probably aromatic ring hydroxylating enzyme                                      |
| Spy49_0611  | rmlD   | E  | 614983 | 615837 | 284  | + | 6985623 | COG1091M  | dTDP-4-dehydrohormose reductase                                                  |
| Spy49_0612  | rgpAc  | E  | 615956 | 617110 | 384  | + | 6985624 | COG0438M  | ramnosyltransferase                                                              |
| Spy49_0613  | rgpBc  | E  | 617100 | 618032 | 310  | + | 6985625 | COG0463M  | Rhamnosyltransferase                                                             |
| Spy49_0614  | rgpCc  | E  | 618035 | 618838 | 267  | + | 6985626 | COG1682GM | Teichoic acid translocation permease tagG                                        |
| Spy49_0615  | rgpDc  | E  | 618838 | 620058 | 406  | + | 6985627 | COG1134GM | Teichoic acid export ATP-binding protein tagH                                    |
| Spy49_0617  | rgpEc  | E  | 620069 | 621076 | 335  | + | 6985628 | COG0463M  | glycosyltransferase                                                              |
| Spy49_0618  | rgpFc  | E  | 621073 | 622818 | 581  | + | 6985629 | COG3754M  | RgpFc protein                                                                    |
| Spy49_0619  | -      | NE | 622815 | 625289 | 824  | + | 6985630 | COG1368M  | hypothetical protein Spy49_0619                                                  |
| Spy49_0620  | -      | NE | 625468 | 626163 | 231  | + | 6985631 | COG0463M  | glycosyl transferase                                                             |
| Spy49_0621  | -      | NE | 626165 | 626506 | 113  | + | 6985632 | -         | hypothetical protein Spy49_0621                                                  |
| Spy49_0622  | -      | E  | 626499 | 627785 | 428  | + | 6985633 | COG2244R  | Heteropolysaccharide repeat unit export protein                                  |
| Spy49_0623  | -      | E  | 627766 | 629262 | 498  | + | 6985634 | COG4713S  | hypothetical protein Spy49_0623                                                  |
| Spy49_0624  | pepT   | NE | 629356 | 630579 | 407  | + | 6985635 | COG2195E  | peptidase T                                                                      |
| Spy49_0625  | -      | NE | 630620 | 631108 | 162  | + | 6985636 | -         | pore-forming peptide                                                             |
| Spy49_0626c | -      | NE | 631095 | 631292 | 65   | - | 6985637 | COG1141C  | ferredoxin                                                                       |
| Spy49_0627  | -      | NE | 631341 | 631817 | 158  | + | 6985638 | -         | hypothetical protein Spy49_0627                                                  |
| Spy49_0628  | cmk    | NC | 631832 | 632512 | 226  | + | 6985639 | COG0283F  | cytidylate kinase                                                                |
| Spy49_0629  | infC   | E  | 632674 | 633204 | 176  | + | 6985640 | COG0290J  | translation initiation factor IF-3                                               |
| Spy49_0630  | rpmI   | NE | 633246 | 633443 | 65   | + | 6985641 | COG0291J  | 50S ribosomal protein L35                                                        |
| Spy49_0631  | rplT   | NC | 633502 | 633861 | 119  | + | 6985642 | COG0292J  | 50S ribosomal protein L20                                                        |
| Spy49_0632c | -      | E  | 634152 | 636362 | 736  | - | 6985643 | COG1368M  | phosphoglycerol transferase                                                      |
| Spy49_0633  | -      | NE | 636470 | 637633 | 387  | + | 6985644 | COG1092R  | hypothetical protein Spy49_0633                                                  |
| Spy49_0634  | aroD   | NE | 637630 | 638316 | 228  | + | 6985645 | COG0710E  | 3-dehydroquinate dehydratase                                                     |
| Spy49_0635  | aroF   | NE | 638410 | 639576 | 388  | + | 6985646 | COG0082E  | chorismate synthase                                                              |
| Spy49_0636  | -      | NE | 639637 | 639978 | 113  | + | 6985647 | COG3679S  | hypothetical protein Spy49_0636                                                  |
| Spy49_0637  | gor    | NE | 640200 | 641552 | 450  | + | 6985648 | COG1249C  | glutathione reductase                                                            |
| Spy49_0638c | folC.2 | NE | 641640 | 642908 | 422  | - | 6985649 | COG0285H  | dihydrofolate synthase / Folylpolylglutamate synthase                            |
| Spy49_0639c | -      | NE | 642938 | 643378 | 146  | - | 6985650 | -         | hypothetical protein Spy49_0639c                                                 |
| Spy49_0640  | nifS   | NE | 643613 | 644755 | 380  | + | 6985651 | COG1104E  | cysteine desulfurase                                                             |
| Spy49_0641  | thil   | NE | 644767 | 645981 | 404  | + | 6985652 | COG0301H  | thiamine biosynthesis protein Thil                                               |
| Spy49_0642  | -      | NE | 646019 | 647287 | 422  | + | 6985653 | COG2843M  | hypothetical protein Spy49_0642                                                  |
| Spy49_0643  | rplU   | NC | 647526 | 647840 | 104  | + | 6985654 | COG0261J  | 50S ribosomal protein L21                                                        |
| Spy49_0644  | -      | NC | 647852 | 648178 | 108  | + | 6985655 | COG2868J  | hypothetical protein Spy49_0644                                                  |
| Spy49_0645  | rpmA   | NC | 648206 | 648499 | 97   | + | 6985656 | COG0211J  | 50S ribosomal protein L27                                                        |
| Spy49_0646  | -      | NE | 648847 | 649761 | 304  | + | 6985657 | COG0583K  | capsular polysaccharide biosynthesis regulatory protein                          |
| Spy49_0647  | lsp    | NE | 649758 | 650216 | 152  | + | 6985658 | COG0597MU | lipoprotein signal peptidase                                                     |
| Spy49_0648  | -      | NE | 650206 | 651096 | 296  | + | 6985659 | COG0564J  | ribosomal large subunit pseudouridine synthase                                   |
| Spy49_0650  | pyrR   | NE | 651492 | 652013 | 173  | + | 6985660 | COG2065F  | bifunctional pyrimidine regulatory protein PyrR uracil phosphoribosyltransferase |
| Spy49_0651  | pyrP   | NE | 652029 | 653288 | 419  | + | 6985661 | COG2233F  | uracil permease                                                                  |
| Spy49_0652  | pyrB   | NE | 653349 | 654284 | 311  | + | 6985662 | COG0540F  | aspartate carbamoyltransferase catalytic subunit                                 |
| Spy49_0653  | carA   | NC | 654328 | 655410 | 360  | + | 6985663 | COG0505E  | carbamoyl phosphate synthase small subunit                                       |
| Spy49_0654  | carB   | NE | 655656 | 658832 | 1058 | + | 6985664 | COG0458E  | carbamoyl phosphate synthase large subunit                                       |
| Spy49_0655  | -      | NE | 659041 | 660312 | 423  | + | 6985665 | COG0845M  | hypothetical protein Spy49_0655                                                  |
| Spy49_0656  | -      | NE | 660312 | 661022 | 236  | + | 6985666 | COG1136V  | ABC transporter                                                                  |
| Spy49_0657  | -      | NE | 661034 | 662254 | 406  | + | 6985667 | COG0577V  | Permease                                                                         |
| Spy49_0658  | -      | C  | 662508 | 664241 | 577  | + | 6985668 | COG4781C  | glycerophosphoryl diester phosphodiesterase                                      |
| Spy49_0659  | rpsP   | E  | 664368 | 664640 | 90   | + | 6985669 | COG0228J  | 30S ribosomal protein S16                                                        |
| Spy49_0660  | -      | NC | 664650 | 664889 | 79   | + | 6985670 | COG1837R  | KH domain-containing protein                                                     |
| Spy49_0661  | -      | NE | 665821 | 668847 | 1008 | + | 6985671 | -         | hypothetical protein Spy49_0661                                                  |
| Spy49_0662  | -      | NE | 668867 | 669268 | 133  | + | 6985672 | COG3576R  | hypothetical protein Spy49_0662                                                  |
| Spy49_0663c | czcD   | NE | 669448 | 670323 | 291  | - | 6985673 | COG1230P  | cation-efflux system membrane protein                                            |
| Spy49_0664  | -      | NE | 670459 | 670980 | 173  | + | 6985674 | -         | hypothetical protein Spy49_0664                                                  |
| Spy49_0665  | rimM   | NC | 671195 | 671713 | 172  | + | 6985675 | COG0806J  | 16S rRNA-processing protein RimM                                                 |
| Spy49_0667  | trmD   | E  | 671700 | 672434 | 244  | + | 6985676 | COG0336J  | tRNA (guanine-N(1)-)-methyltransferase                                           |
| Spy49_0668  | -      | NE | 672434 | 673426 | 330  | + | 6985677 | COG0492O  | thioredoxin reductase                                                            |
| Spy49_0669  | -      | NE | 673603 | 674661 | 352  | + | 6985678 | COG3641R  | regulatory protein                                                               |
| Spy49_0671  | apbA   | NE | 674674 | 675597 | 307  | + | 6985679 | COG1893H  | 2-dehydropantoate 2-reductase                                                    |
| Spy49_0672  | fruR   | NE | 675853 | 676566 | 237  | + | 6985680 | COG1349KG | transcriptional repressor                                                        |
| Spy49_0673  | fruK   | NE | 676563 | 677474 | 303  | + | 6985681 | COG1105G  | tagatose-6-phosphate kinase                                                      |
| Spy49_0674  | fruA   | NE | 677471 | 679417 | 648  | + | 6985682 | COG1299G  | PTS system fructose-specific IIBC component                                      |
| Spy49_0675  | -      | NE | 679516 | 680109 | 197  | + | 6985683 | COG1705NU | peptidoglycan hydrolase                                                          |
| Spy49_0676  | -      | NE | 680261 | 680968 | 235  | + | 6985684 | COG1705NU | peptidoglycan hydrolase                                                          |
| Spy49_0677c | -      | NE | 681025 | 681243 | 73   | - | 6985685 | -         | transposase, IS5mu1                                                              |
| Spy49_0679  | mac    | NE | 681925 | 682944 | 339  | - | 6985687 | -         | Immunoglobulin G-endorpeptidase (IdeS) / Mac                                     |
| Spy49_0680  | -      | NE | 683850 | 684230 | 126  | + | 6985688 | COG4835S  | hypothetical protein Spy49_0680                                                  |
| Spy49_0681  | -      | NE | 684230 | 685078 | 282  | + | 6985689 | COG1307S  | DegV family protein                                                              |
| Spy49_0682  | pap5   | E  | 685252 | 686412 | 386  | + | 6985690 | COG0617J  | tRNA CCA-pyrophosphorylase                                                       |
| Spy49_0683  | -      | NE | 686409 | 688286 | 625  | + | 6985691 | COG0488R  | ABC transporter                                                                  |
| Spy49_0684  | -      | NE | 689180 | 689590 | 136  | + | 6985692 | COG0242J  | peptide deformylase                                                              |



|             |       |    |        |        |      |   |         |           |                                                    |
|-------------|-------|----|--------|--------|------|---|---------|-----------|----------------------------------------------------|
| Spy49_0686c | -     | NE | 689672 | 691684 | 670  | - | 6985693 | COG0737F  | 5-nucleotidase                                     |
| Spy49_0687  | -     | NE | 691904 | 692554 | 216  | + | 6985694 | COG2357S  | GTP pyrophosphokinase                              |
| Spy49_0688  | -     | NE | 692557 | 693225 | 222  | + | 6985695 | COG0745TK | DNA-binding response regulator                     |
| Spy49_0689  | -     | NE | 693234 | 694466 | 410  | + | 6985696 | COG0642T  | two-component sensor histidine kinase              |
| Spy49_0690  | mvaK1 | E  | 694760 | 695638 | 292  | + | 6985697 | COG1577I  | mevalonate kinase                                  |
| Spy49_0691  | mvaD  | E  | 695620 | 696564 | 314  | + | 6985698 | COG3407I  | Diphosphomevalonate decarboxylase                  |
| Spy49_0692  | mvaK2 | E  | 696557 | 697570 | 337  | + | 6985699 | COG1577I  | phosphomevalonate kinase                           |
| Spy49_0693  | -     | E  | 697557 | 698546 | 329  | + | 6985700 | COG1304C  | isopentenyl pyrophosphate isomerase                |
| Spy49_0694c | mvaS1 | E  | 698776 | 700053 | 425  | - | 6985701 | COG1257I  | hydroxymethylglutaryl-CoA reductase                |
| Spy49_0695c | mvaS2 | E  | 700040 | 701215 | 391  | - | 6985702 | COG3425I  | hydroxymethylglutaryl-CoA synthase                 |
| Spy49_0696  | thyA  | C  | 701424 | 702263 | 279  | + | 6985703 | COG0207F  | thymidylate synthase                               |
| Spy49_0697  | dyr   | E  | 702343 | 702840 | 165  | + | 6985704 | COG0262H  | dihydrofolate reductase                            |
| Spy49_0698  | -     | NE | 702860 | 703060 | 66   | + | 6985705 | -         | hypothetical protein Spy49_0698                    |
| Spy49_0700  | clpX  | NC | 703161 | 704390 | 409  | + | 6985706 | COG1219O  | ATP-dependent protease ATP-binding protein ClpX    |
| Spy49_0701  | engB  | E  | 704400 | 704999 | 199  | + | 6985707 | COG0218R  | ribosome biogenesis GTP-binding protein YsxC       |
| Spy49_0702  | -     | NE | 705147 | 705890 | 247  | + | 6985708 | -         | hypothetical protein Spy49_0702                    |
| Spy49_0703c | clpL  | NE | 705948 | 708047 | 699  | - | 6985709 | COG0542O  | ATP-dependent Clp protease                         |
| Spy49_0704  | rplA  | NC | 708425 | 709108 | 227  | + | 6985710 | COG0120G  | ribose-5-phosphate isomerase A                     |
| Spy49_0705  | deoB  | NE | 709185 | 710396 | 403  | + | 6985711 | COG1015G  | phosphopentomutase                                 |
| Spy49_0706  | arsC  | NE | 710415 | 710855 | 146  | + | 6985712 | COG1393P  | arsenate reductase                                 |
| Spy49_0707  | punA  | NE | 710839 | 711648 | 269  | + | 6985713 | COG0005F  | purine nucleoside phosphorylase                    |
| Spy49_0708  | deoD  | NE | 712176 | 712946 | 256  | + | 6985714 | COG0813F  | purine nucleoside phosphorylase                    |
| Spy49_0709  | -     | NE | 712939 | 713727 | 262  | + | 6985715 | -         | histidine protein kinase                           |
| Spy49_0710c | cpsY  | NE | 713807 | 714712 | 301  | - | 6985716 | COG0583K  | transcriptional regulator                          |
| Spy49_0711  | -     | NE | 714934 | 715470 | 178  | + | 6985717 | -         | hypothetical protein Spy49_0711                    |
| Spy49_0712  | pyrF  | NE | 715747 | 716439 | 230  | + | 6985718 | COG0284F  | orotidine 5'-phosphate decarboxylase               |
| Spy49_0713  | pyrE  | NE | 716497 | 717126 | 209  | + | 6985719 | COG0461F  | orotate phosphoribosyltransferase                  |
| Spy49_0714  | amiC  | NE | 717323 | 718777 | 484  | + | 6985720 | COG0154J  | amidase                                            |
| Spy49_0715  | -     | NE | 718895 | 719758 | 287  | + | 6985721 | COG0834ET | ABC transporter                                    |
| Spy49_0716  | -     | NE | 719787 | 720437 | 216  | + | 6985722 | COG0765E  | amino-acid ABC transporter permease yckA           |
| Spy49_0717  | ung   | NE | 720570 | 721223 | 217  | + | 6985723 | COG0692L  | uracil-DNA glycosylase                             |
| Spy49_0718  | pyrC  | NE | 721355 | 722623 | 422  | + | 6985724 | COG0044F  | dihydroorotase                                     |
| Spy49_0719c | -     | E  | 722681 | 723322 | 213  | - | 6985725 | COG0344S  | glycerol-3-phosphate acyltransferase PlsY          |
| Spy49_0720  | parE  | E  | 723457 | 725406 | 649  | + | 6985726 | COG0187L  | DNA topoisomerase IV subunit B                     |
| Spy49_0721  | parC  | E  | 725497 | 727956 | 819  | + | 6985727 | COG0188L  | DNA topoisomerase IV subunit A                     |
| Spy49_0722  | bcaT  | NE | 728079 | 729101 | 340  | + | 6985728 | COG0115EH | branched-chain amino acid aminotransferase         |
| Spy49_0723  | -     | NC | 729165 | 729395 | 76   | + | 6985729 | -         | hypothetical protein Spy49_0723                    |
| Spy49_0724  | rpsA  | E  | 729786 | 730991 | 401  | + | 6985732 | COG0539J  | 30S ribosomal protein S1                           |
| Spy49_0725c | -     | NE | 731493 | 731795 | 100  | - | 6985734 | -         | hypothetical protein Spy49_0725c                   |
| Spy49_0726  | -     | NE | 731996 | 732982 | 328  | + | 6985735 | COG1054R  | hypothetical protein Spy49_0726                    |
| Spy49_0727  | -     | NE | 733293 | 733700 | 135  | + | 6985736 | -         | hypothetical protein Spy49_0727                    |
| Spy49_0728  | -     | NE | 733950 | 734858 | 302  | + | 6985737 | COG1275P  | exfoliative toxin                                  |
| Spy49_0729c | -     | NE | 734976 | 735152 | 58   | - | 6985738 | -         | hypothetical protein Spy49_0729c                   |
| Spy49_0730  | miaA  | NE | 735286 | 736185 | 299  | + | 6985739 | COG0324J  | tRNA delta(2)-isopentenylpyrophosphate transferase |
| Spy49_0731  | hflX  | NE | 736258 | 737496 | 412  | + | 6985740 | COG2262R  | GTP-binding protein HflX                           |
| Spy49_0732  | -     | NE | 737489 | 738124 | 211  | + | 6985741 | COG4468G  | hypothetical protein Spy49_0732                    |
| Spy49_0733  | -     | E  | 738139 | 739068 | 309  | + | 6985742 | COG1234R  | ribonuclease Z                                     |
| Spy49_0734  | -     | NE | 739228 | 739833 | 201  | + | 6985743 | COG0300R  | oxidoreductase                                     |
| Spy49_0735  | recJ  | NE | 739830 | 742040 | 736  | + | 6985744 | COG0608L  | Single-stranded-DNA-specific exonuclease recJ      |
| Spy49_0736  | apt   | NE | 742190 | 742708 | 172  | + | 6985745 | COG0503F  | adenine phosphoribosyltransferase                  |
| Spy49_0737  | dnaD  | E  | 742789 | 743472 | 227  | + | 6985746 | COG3935L  | DNA replication protein DnaD                       |
| Spy49_0738  | nth   | NE | 743469 | 744125 | 218  | + | 6985747 | COG0177L  | endonuclease III                                   |
| Spy49_0739  | -     | E  | 744197 | 744883 | 228  | + | 6985748 | COG2384R  | hypothetical protein Spy49_0739                    |
| Spy49_0740  | -     | NE | 744873 | 745661 | 262  | + | 6985749 | COG0327S  | hypothetical protein Spy49_0740                    |
| Spy49_0741  | -     | NE | 745701 | 746825 | 374  | + | 6985750 | COG0665E  | oxidoreductase                                     |
| Spy49_0742  | rmlA  | E  | 746864 | 747733 | 289  | + | 6985751 | COG1209M  | glucose-1-phosphate thymidyltransferase            |
| Spy49_0744  | rmlC  | NC | 747733 | 748326 | 197  | + | 6985752 | COG1898M  | dTDP-4-dehydrothamnose 3,5-epimerase               |
| Spy49_0745  | rmlB  | E  | 748570 | 749610 | 346  | + | 6985753 | COG1088M  | dTDP-glucose 4,6-dehydratase                       |
| Spy49_0746c | -     | NE | 749693 | 750832 | 379  | - | 6985754 | COG4974L  | Prophage ps2 integrase                             |
| Spy49_0747c | -     | NE | 750960 | 751226 | 88   | - | 6985755 | -         | hypothetical protein Spy49_0747c                   |
| Spy49_0748c | -     | NE | 751238 | 751624 | 128  | - | 6985756 | -         | phage-associated protein                           |
| Spy49_0749c | -     | C  | 751627 | 751977 | 116  | - | 6985757 | COG1396K  | repressor-phage associated                         |
| Spy49_0750  | -     | NC | 752273 | 752443 | 56   | + | 6985758 | -         | hypothetical protein Spy49_0750                    |
| Spy49_0751c | -     | NC | 752469 | 753257 | 262  | - | 6985759 | -         | hypothetical protein Spy49_0751c                   |
| Spy49_0752  | -     | NC | 753308 | 753499 | 63   | + | 6985760 | -         | antirepressor protein                              |
| Spy49_0753  | -     | NC | 753578 | 753889 | 103  | + | 6985761 | -         | excisionase                                        |
| Spy49_0754  | -     | NC | 753891 | 754061 | 56   | + | 6985762 | -         | putative phage associated protein                  |
| Spy49_0755  | -     | NC | 754054 | 754257 | 67   | + | 6985763 | -         | hypothetical protein Spy49_0755                    |
| Spy49_0756  | -     | NE | 754254 | 754640 | 128  | + | 6985764 | -         | hypothetical protein Spy49_0756                    |
| Spy49_0757  | -     | NC | 754786 | 754989 | 67   | + | 6985765 | -         | putative phage associated protein                  |
| Spy49_0759  | -     | NC | 755077 | 755376 | 99   | + | 6985766 | -         | putative phage associated protein                  |
| Spy49_0760  | -     | NE | 755376 | 756533 | 385  | + | 6985767 | -         | phage-associated protein                           |
| Spy49_0761  | -     | NE | 756548 | 757105 | 185  | + | 6985768 | -         | hypothetical protein Spy49_0761                    |
| Spy49_0762  | -     | NC | 757148 | 759070 | 640  | + | 6985769 | COG0749L  | DNA polymerase                                     |
| Spy49_0763  | -     | NC | 759075 | 761459 | 794  | + | 6985770 | COG3378R  | DNA primase/helicase-phage associated              |
| Spy49_0764  | -     | NC | 761827 | 762120 | 97   | + | 6985771 | -         | hypothetical protein Spy49_0764                    |
| Spy49_0765  | -     | NC | 762117 | 763439 | 440  | + | 6985772 | COG0553KL | helicase-phage associated                          |
| Spy49_0766  | -     | NE | 763603 | 763875 | 90   | + | 6985773 | -         | hypothetical protein Spy49_0766                    |
| Spy49_0767  | -     | NE | 764008 | 764424 | 138  | + | 6985774 | -         | transcriptional activator-phage associated         |
| Spy49_0768  | -     | NE | 764496 | 764966 | 156  | + | 6985775 | COG3728L  | terminase small subunit                            |
| Spy49_0769  | -     | NE | 764956 | 766233 | 425  | + | 6985776 | COG1783R  | terminase large subunit                            |
| Spy49_0770  | -     | NE | 766249 | 767781 | 510  | + | 6985777 | -         | phage-associated protein                           |
| Spy49_0771  | -     | NE | 767747 | 769189 | 480  | + | 6985778 | COG5585T  | phage-associated protein                           |
| Spy49_0772  | -     | NE | 769410 | 769802 | 130  | + | 6985779 | -         | putative phage associated protein                  |
| Spy49_0773  | -     | NC | 769845 | 770414 | 189  | + | 6985780 | -         | phage protein                                      |
| Spy49_0774  | -     | NE | 770427 | 771314 | 295  | + | 6985781 | -         | major head protein (phage associated)              |
| Spy49_0775  | -     | NE | 771326 | 771682 | 118  | + | 6985782 | -         | phage protein                                      |
| Spy49_0776  | -     | NE | 771693 | 771971 | 92   | + | 6985783 | -         | putative phage associated protein                  |
| Spy49_0777  | -     | NE | 771968 | 772312 | 114  | + | 6985784 | -         | hypothetical protein Spy49_0777                    |
| Spy49_0778  | -     | NC | 772316 | 772675 | 119  | + | 6985785 | -         | putative phage associated protein                  |
| Spy49_0779  | -     | C  | 772687 | 773286 | 199  | + | 6985786 | -         | phage protein                                      |
| Spy49_0780  | -     | NC | 773393 | 773794 | 133  | + | 6985787 | -         | putative phage associated protein                  |
| Spy49_0781  | -     | NE | 773869 | 774102 | 77   | + | 6985788 | -         | putative phage associated protein                  |
| Spy49_0782  | -     | NC | 774117 | 778499 | 1460 | + | 6985789 | -         | hypothetical protein Spy49_0782                    |
| Spy49_0783  | -     | NE | 778511 | 779353 | 280  | + | 6985790 | -         | putative phage associated protein                  |
| Spy49_0784  | -     | NC | 779363 | 781342 | 659  | + | 6985791 | -         | phage protein                                      |
| Spy49_0785  | -     | NC | 781339 | 783582 | 747  | + | 6985792 | -         | phage hyaluronidase                                |
| Spy49_0786  | -     | NC | 783594 | 783755 | 53   | + | 6985793 | -         | hypothetical protein Spy49_0786                    |
| Spy49_0788  | -     | NE | 783758 | 784369 | 203  | + | 6985794 | -         | hypothetical protein Spy49_0788                    |
| Spy49_0789  | -     | NE | 784379 | 784834 | 151  | + | 6985795 | COG4824R  | holin protein-phage associated                     |
| Spy49_0790  | -     | NE | 784952 | 785704 | 250  | + | 6985796 | -         | phage-associated cell wall hydrolase               |
| Spy49_0791  | -     | NE | 785870 | 786157 | 95   | + | 6985797 | -         | hypothetical protein Spy49_0791                    |
| Spy49_0792  | speH  | NE | 786363 | 787073 | 236  | + | 6985798 | -         | streptococcal pyrogenic exotoxin H (SpeH)          |
| Spy49_0793  | nutX  | NE | 787677 | 788153 | 158  | + | 6985799 | COG1051F  | 7,8-dihydro-8-oxoguanine-triphosphatase            |
| Spy49_0794  | -     | NE | 788211 | 789392 | 393  | + | 6985800 | COG0628R  | hypothetical protein Spy49_0794                    |
| Spy49_0795  | -     | NE | 789382 | 790629 | 415  | + | 6985801 | COG3063NU | hypothetical protein Spy49_0795                    |
| Spy49_0796c | -     | NE | 790688 | 792340 | 550  | - | 6985802 | COG1293K  | fibronectin-binding protein-like protein A         |

|             |        |    |        |        |      |   |         |           |                                                                                     |
|-------------|--------|----|--------|--------|------|---|---------|-----------|-------------------------------------------------------------------------------------|
| Spy49_0797  | -      | NE | 792694 | 793692 | 332  | + | 6985803 | COG2984R  | ABC transporter substrate-binding protein                                           |
| Spy49_0798  | -      | NC | 793643 | 793861 | 72   | + | 6985804 | -         | hypothetical protein Spy49_0798                                                     |
| Spy49_0799  | -      | NE | 794037 | 794906 | 289  | + | 6985805 | COG4120R  | ABC transport protein                                                               |
| Spy49_0800  | -      | NE | 794903 | 795661 | 252  | + | 6985806 | COG1101R  | ABC transporter                                                                     |
| Spy49_0801  | -      | E  | 795865 | 797526 | 553  | + | 6985807 | COG0595R  | hypothetical protein Spy49_0801                                                     |
| Spy49_0803  | estA   | NE | 797659 | 798444 | 261  | + | 6985808 | COG0627R  | Tributyryn esterase                                                                 |
| Spy49_0804  | -      | NE | 798474 | 798800 | 108  | + | 6985809 | -         | hypothetical protein Spy49_0804                                                     |
| Spy49_0805  | -      | NE | 798846 | 800753 | 635  | + | 6985810 | COG0488R  | ABC transporter                                                                     |
| Spy49_0807  | acoA   | NE | 801026 | 802006 | 326  | + | 6985811 | COG1071C  | pyruvate dehydrogenase E1 component subunit alpha                                   |
| Spy49_0808  | acoB   | NE | 802062 | 803063 | 333  | + | 6985812 | COG0022C  | pyruvate dehydrogenase E1 component subunit beta                                    |
| Spy49_0809  | acoC   | NE | 803248 | 804657 | 469  | + | 6985813 | COG0508C  | branched-chain alpha-keto acid dehydrogenase subunit E2                             |
| Spy49_0810  | acoL   | NE | 804984 | 806747 | 587  | + | 6985814 | COG1249C  | dihydropyrimidine dehydrogenase                                                     |
| Spy49_0811c | hylA   | NE | 807422 | 809839 | 805  | - | 6985815 | -         | Extracellular hyaluronate lyase                                                     |
| Spy49_0812  | -      | NE | 810072 | 811061 | 329  | + | 6985816 | COG0095H  | Lipoate-protein ligase A                                                            |
| Spy49_0813c | cobQ   | E  | 811170 | 811961 | 263  | - | 6985817 | COG3442R  | Cobyrinic acid synthase                                                             |
| Spy49_0814c | murC2  | E  | 811961 | 813304 | 447  | - | 6985818 | COG0769M  | UDP-N-acetylmuramyl tripeptide synthetase                                           |
| Spy49_0815  | -      | E  | 813406 | 814257 | 283  | + | 6985819 | COG1624S  | hypothetical protein Spy49_0815                                                     |
| Spy49_0816  | -      | NE | 814254 | 815210 | 318  | + | 6985820 | COG4856S  | hypothetical protein Spy49_0816                                                     |
| Spy49_0817  | glmM   | E  | 815264 | 816616 | 450  | + | 6985821 | COG1109G  | phosphoglucosamine mutase                                                           |
| Spy49_0818  | -      | NE | 816739 | 817380 | 213  | + | 6985822 | -         | hypothetical protein Spy49_0818                                                     |
| Spy49_0819  | hemN   | NE | 817377 | 818573 | 398  | + | 6985823 | COG0635H  | coproporphyrinogen III oxidase                                                      |
| Spy49_0820  | -      | E  | 818583 | 819335 | 250  | + | 6985824 | COG3884I  | acyl-ACP thioesterase                                                               |
| Spy49_0821  | -      | NE | 819335 | 820099 | 254  | + | 6985825 | COG0647G  | phosphatase NagD                                                                    |
| Spy49_0822  | -      | NE | 820096 | 820731 | 211  | + | 6985826 | COG4478S  | hypothetical protein Spy49_0822                                                     |
| Spy49_0823  | -      | NE | 821210 | 825316 | 1368 | + | 6985827 | COG3513S  | hypothetical protein Spy49_0823                                                     |
| Spy49_0825  | -      | NE | 825316 | 826185 | 289  | + | 6985828 | COG1518L  | Lipoyl-binding domain-containing protein                                            |
| Spy49_0826  | -      | NE | 826182 | 826523 | 113  | + | 6985829 | COG3512S  | hypothetical protein Spy49_0826                                                     |
| Spy49_0827  | -      | NE | 826513 | 827175 | 220  | + | 6985830 | -         | hypothetical protein Spy49_0827                                                     |
| Spy49_0828  | -      | NE | 827952 | 828122 | 56   | + | 6985831 | COG0105F  | nucleoside diphosphate kinase                                                       |
| Spy49_0829  | lepA-2 | NE | 828223 | 830055 | 610  | + | 6985832 | COG0481M  | GTP-binding protein LepA                                                            |
| Spy49_0830  | sclB   | NC | 830338 | 831435 | 365  | + | 6985833 | -         | SclB protein                                                                        |
| Spy49_0831  | csrA   | NE | 831620 | 832057 | 145  | + | 6985834 | COG0229O  | methionine sulfoxide reductase B                                                    |
| Spy49_0832  | -      | NE | 832187 | 833206 | 339  | + | 6985835 | COG2855S  | hypothetical protein Spy49_0832                                                     |
| Spy49_0833  | -      | NE | 833413 | 833838 | 141  | + | 6985836 | COG2893G  | PTS system IIA component                                                            |
| Spy49_0834  | -      | NC | 833865 | 834356 | 163  | + | 6985837 | COG3444G  | PTS system IIB component                                                            |
| Spy49_0835  | -      | NE | 834449 | 835183 | 244  | + | 6985838 | COG3715G  | phosphotransferase system (PTS), enzyme II component C                              |
| Spy49_0836  | -      | NE | 835180 | 836019 | 279  | + | 6985839 | COG3716G  | phosphotransferase system (PTS), enzyme II component D                              |
| Spy49_0837  | -      | NE | 836144 | 837793 | 549  | + | 6985840 | COG2972T  | two-component sensor histidine kinase                                               |
| Spy49_0839  | -      | NE | 837797 | 838585 | 262  | + | 6985841 | COG4753T  | two-component response regulator                                                    |
| Spy49_0840  | -      | NE | 838579 | 839625 | 348  | + | 6985842 | COG1840P  | iron ABC transporter iron-binding protein                                           |
| Spy49_0841  | -      | NE | 839741 | 841138 | 465  | + | 6985843 | COG1012C  | succinate-semialdehyde dehydrogenase NADP+                                          |
| Spy49_0842  | uvrC   | NE | 841239 | 843035 | 598  | + | 6985844 | COG0322L  | excinuclease ABC subunit C                                                          |
| Spy49_0843  | -      | NE | 843221 | 843823 | 200  | + | 6985845 | COG0778C  | NADH dehydrogenase                                                                  |
| Spy49_0844  | -      | NE | 843948 | 845357 | 469  | + | 6985846 | COG0624E  | dipeptidase PepV                                                                    |
| Spy49_0845c | trmE   | E  | 845425 | 846801 | 458  | - | 6985847 | COG0486R  | tRNA modification GTPase TrmE                                                       |
| Spy49_0846  | rplJ   | NE | 847136 | 847636 | 166  | + | 6985848 | COG0244J  | 50S ribosomal protein L10                                                           |
| Spy49_0847  | -      | NC | 847701 | 847799 | 32   | + | 6985849 | -         | hypothetical protein Spy49_0847                                                     |
| Spy49_0848  | rplL   | NC | 847874 | 848065 | 63   | + | 6985850 | COG0222J  | 50S ribosomal protein L7/L12, partial                                               |
| Spy49_0849  | dacA1  | NE | 848292 | 849605 | 437  | + | 6985851 | COG1686M  | Penicillin-binding protein 7                                                        |
| Spy49_0850c | -      | NE | 849658 | 850620 | 320  | - | 6985852 | COG0726G  | polysaccharide deacetylase                                                          |
| Spy49_0851  | folC1  | E  | 850952 | 852229 | 425  | + | 6985853 | COG0285H  | dihydrofolate synthase                                                              |
| Spy49_0852  | folE   | NE | 852264 | 852848 | 194  | + | 6985854 | COG0302H  | GTP cyclohydrolase I                                                                |
| Spy49_0853  | folP   | NC | 852857 | 853657 | 266  | + | 6985855 | COG0294H  | dihydropteroate synthase                                                            |
| Spy49_0854  | folQ   | NE | 853664 | 854023 | 119  | + | 6985856 | COG1539H  | dihydropteroin aldolase                                                             |
| Spy49_0855  | folK   | NE | 854020 | 854520 | 165  | + | 6985857 | COG0801H  | 2-amino-4-hydroxy-6-hydroxymethylidihydropteridine pyrophosphokinase                |
| Spy49_0856  | murB   | E  | 854670 | 855557 | 295  | + | 6985858 | COG0812M  | UDP-N-acetylenolpyruvylglucosamine reductase                                        |
| Spy49_0857  | potA   | NE | 855603 | 856757 | 384  | + | 6985859 | COG3842E  | Spermidine Putrescine transport ATP-binding protein potA                            |
| Spy49_0858  | potB   | NE | 856741 | 857535 | 264  | + | 6985860 | COG1176E  | Spermidine Putrescine ABC transporter permease potB                                 |
| Spy49_0859  | potC   | NE | 857532 | 858308 | 258  | + | 6985861 | COG1177E  | Spermidine Putrescine ABC transporter permease potC                                 |
| Spy49_0860  | potD   | NE | 858301 | 859374 | 357  | + | 6985862 | COG0687E  | spermidine/putrescine ABC transporter substrate-binding protein                     |
| Spy49_0861c | -      | NE | 859429 | 860094 | 221  | - | 6985863 | COG4565KT | two-component response regulator                                                    |
| Spy49_0862c | -      | NE | 860075 | 861616 | 513  | - | 6985864 | COG3290T  | two-component sensor histidine kinase                                               |
| Spy49_0863  | malP   | NE | 861777 | 863108 | 443  | + | 6985865 | COG3493C  | L-malate permease                                                                   |
| Spy49_0864  | -      | NE | 863140 | 864306 | 388  | + | 6985866 | COG0281C  | NAD-dependent malic enzyme                                                          |
| Spy49_0865c | -      | NE | 864388 | 865437 | 349  | - | 6985867 | COG1063ER | zinc-containing alcohol dehydrogenase                                               |
| Spy49_0866  | aphA   | NE | 865673 | 866404 | 243  | + | 6985868 | COG3700R  | acid phosphatase/phosphotransferase                                                 |
| Spy49_0867  | -      | NE | 866582 | 868114 | 510  | + | 6985869 | COG0038P  | voltage-gated chloride channel protein                                              |
| Spy49_0868  | -      | NE | 868277 | 868891 | 204  | + | 6985870 | COG2755E  | hypothetical protein Spy49_0868                                                     |
| Spy49_0869  | -      | NE | 869071 | 870180 | 369  | + | 6985871 | COG0628R  | hypothetical protein Spy49_0869                                                     |
| Spy49_0870  | radC   | NE | 870247 | 870927 | 226  | + | 6985872 | COG2003L  | DNA repair protein RadC                                                             |
| Spy49_0871c | -      | NE | 870929 | 871624 | 231  | - | 6985873 | COG2071R  | glutamine amidotransferase, class I                                                 |
| Spy49_0872c | -      | NE | 871634 | 872278 | 214  | - | 6985874 | COG2344R  | redox-sensing transcriptional repressor Rex                                         |
| Spy49_0873c | -      | NE | 872530 | 872877 | 115  | - | 6985875 | -         | hypothetical protein Spy49_0873c                                                    |
| Spy49_0874c | -      | E  | 872867 | 873994 | 375  | - | 6985876 | COG1104E  | cysteine desulfurase                                                                |
| Spy49_0875c | prs    | NE | 873991 | 874971 | 326  | - | 6985877 | COG0462FE | ribose-phosphate pyrophosphokinase                                                  |
| Spy49_0876c | -      | NC | 875111 | 875689 | 192  | - | 6985878 | COG4116S  | hypothetical protein Spy49_0876c                                                    |
| Spy49_0877  | -      | NE | 875777 | 876448 | 223  | + | 6985879 | COG2357S  | GTP pyrophosphokinase                                                               |
| Spy49_0878  | ppnK   | E  | 876423 | 877259 | 278  | + | 6985880 | COG0061G  | inorganic polyphosphate/ATP-NAD kinase                                              |
| Spy49_0879  | rluD   | NE | 877256 | 878161 | 301  | + | 6985881 | COG0564J  | RluD subfamily ribosomal large subunit pseudouridine synthase                       |
| Spy49_0880  | eutD   | NE | 878165 | 879160 | 331  | + | 6985882 | COG0280C  | phosphotransacetylase                                                               |
| Spy49_0881  | -      | NE | 879286 | 880041 | 251  | + | 6985883 | COG4221R  | short chain dehydrogenase/reductase                                                 |
| Spy49_0882c | -      | NE | 880235 | 880924 | 229  | - | 6985884 | -         | hypothetical protein Spy49_0882c                                                    |
| Spy49_0883  | proV   | NE | 881350 | 882078 | 242  | + | 6985885 | COG1125E  | L-proline glycine betaine ABC transport ATP- binding protein proV                   |
| Spy49_0884  | proX   | NE | 882071 | 883597 | 508  | + | 6985886 | COG1732M  | L-proline glycine betaine binding ABC transporter protein proX / Osmotic adaptation |
| Spy49_0885  | -      | NE | 883875 | 884858 | 327  | + | 6985887 | COG0516F  | guanosine 5'-monophosphate oxidoreductase                                           |
| Spy49_0886c | -      | NE | 884895 | 885152 | 85   | - | 6985888 | -         | hypothetical protein Spy49_0886c                                                    |
| Spy49_0887  | xpt    | NE | 885163 | 885744 | 193  | + | 6985889 | COG0503F  | xanthine phosphoribosyltransferase                                                  |
| Spy49_0888  | -      | NE | 885744 | 887027 | 427  | + | 6985890 | COG2233F  | xanthine permease                                                                   |
| Spy49_0891c | -      | NE | 887091 | 888029 | 312  | - | 6985891 | COG1477H  | thiamine biosynthesis lipoprotein                                                   |
| Spy49_0892c | -      | NE | 888082 | 888267 | 61   | - | 6985892 | COG1942R  | 4-oxalocrotonate tautomerase                                                        |
| Spy49_0893  | tdk    | NE | 888405 | 888974 | 189  | + | 6985893 | COG1435F  | thymidine kinase                                                                    |
| Spy49_0894  | prfA   | E  | 889009 | 890088 | 359  | + | 6985894 | COG0216J  | peptide chain release factor 1                                                      |
| Spy49_0895  | hemK   | NC | 890088 | 890927 | 279  | + | 6985895 | COG2890J  | protoporphyrinogen oxidase                                                          |
| Spy49_0896  | -      | E  | 890911 | 891501 | 196  | + | 6985896 | COG0009J  | Sua5/YciO/YrdC family protein                                                       |
| Spy49_0897  | -      | NE | 891519 | 891971 | 150  | + | 6985897 | COG0456R  | hypothetical protein Spy49_0897                                                     |
| Spy49_0898  | glyA   | NE | 891961 | 893217 | 418  | + | 6985898 | COG0112E  | serine hydroxymethyltransferase                                                     |
| Spy49_0899  | -      | NC | 893224 | 894201 | 325  | + | 6985899 | -         | hypothetical protein Spy49_0899                                                     |
| Spy49_0900  | -      | NE | 894202 | 894801 | 199  | + | 6985900 | -         | Pneumococcal vaccine antigen A-like protein                                         |
| Spy49_0901  | -      | NC | 894811 | 896535 | 574  | + | 6985901 | COG1132V  | ABC transporter ATP-binding protein/permease                                        |
| Spy49_0902  | -      | NE | 896532 | 898247 | 571  | + | 6985902 | COG1132V  | ABC transporter                                                                     |
| Spy49_0903  | nox1   | NE | 898500 | 899870 | 456  | + | 6985903 | COG0446R  | NADH oxidase                                                                        |
| Spy49_0904c | ldh    | C  | 900029 | 901012 | 327  | - | 6985904 | COG0039C  | L-lactate dehydrogenase                                                             |
| Spy49_0905  | gyrA   | E  | 901203 | 903689 | 828  | + | 6985905 | COG0188L  | DNA gyrase subunit A                                                                |
| Spy49_0906  | -      | C  | 903709 | 904458 | 249  | + | 6985906 | COG3764M  | Sortase                                                                             |
| Spy49_0907  | -      | C  | 904538 | 904954 | 138  | + | 6985907 | COG0346E  | lactoylglutathione lyase                                                            |
| Spy49_0908  | -      | NE | 905603 | 906007 | 134  | + | 6985908 | -         | hypothetical protein Spy49_0908                                                     |
| Spy49_0909c | -      | NE | 906057 | 906968 | 303  | - | 6985909 | COG1597IR | hypothetical protein Spy49_0909c                                                    |

|             |        |    |         |         |      |   |         |            |                                                                      |
|-------------|--------|----|---------|---------|------|---|---------|------------|----------------------------------------------------------------------|
| Spy49_0910c | hlyIII | E  | 907220  | 907735  | 171  | - | 6985910 | COG1272R   | hemolysin III, partial                                               |
| Spy49_0911c | -      | NE | 907732  | 908172  | 146  | - | 6985911 | -          | hypothetical protein Spy49_0911c                                     |
| Spy49_0912  | rbgA   | E  | 908391  | 909239  | 282  | + | 6985912 | COG1161R   | ribosomal biogenesis GTPase                                          |
| Spy49_0913  | rnhB   | NE | 909229  | 910020  | 263  | + | 6985913 | COG0164L   | ribonuclease HI                                                      |
| Spy49_0914  | smf    | NE | 910085  | 910921  | 278  | + | 6985914 | COG0758LU  | DNA processing protein                                               |
| Spy49_0915  | topA   | E  | 911028  | 913157  | 709  | + | 6985915 | COG0550L   | DNA topoisomerase I                                                  |
| Spy49_0916c | -      | NE | 913233  | 913715  | 160  | - | 6985916 | -          | LysR family transcriptional regulator                                |
| Spy49_0917c | -      | NC | 913722  | 913844  | 40   | - | 6985917 | -          | LysR family transcriptional regulator                                |
| Spy49_0918  | -      | NE | 914130  | 914696  | 188  | + | 6985918 | COG3641R   | Regulatory protein                                                   |
| Spy49_0919  | -      | NE | 914711  | 915703  | 330  | + | 6985919 | COG1052CHR | D-lactate dehydrogenase                                              |
| Spy49_0920  | -      | E  | 915808  | 916473  | 221  | + | 6985920 | -          | acid tolerance SatD-like protein                                     |
| Spy49_0921  | -      | NE | 916466  | 917182  | 238  | + | 6985921 | -          | hypothetical protein Spy49_0921                                      |
| Spy49_0922  | gid    | NC | 917333  | 918679  | 448  | + | 6985922 | COG1206J   | tRNA (uracil-5-)-methyltransferase Gid                               |
| Spy49_0923  | -      | NE | 918856  | 920238  | 460  | + | 6985923 | COG5016C   | oxaloacetate decarboxylase                                           |
| Spy49_0924  | -      | NE | 920281  | 920595  | 104  | + | 6985924 | -          | hypothetical protein Spy49_0924                                      |
| Spy49_0925  | -      | NE | 920595  | 920945  | 116  | + | 6985925 | COG4770I   | Biotin carboxyl carrier protein of oxaloacetate decarboxylase        |
| Spy49_0926  | -      | NC | 920955  | 922085  | 376  | + | 6985926 | COG1883C   | Oxaloacetate decarboxylase subunit beta                              |
| Spy49_0927c | citG   | NE | 922286  | 923170  | 294  | - | 6985927 | COG1767H   | 2-(5-triphosphoribosyl)-3-dephosphocoenzyme-A synthase               |
| Spy49_0928c | -      | NE | 923163  | 923858  | 231  | - | 6985928 | COG1802K   | GntR family transcriptional regulator                                |
| Spy49_0929c | -      | NE | 924016  | 925422  | 468  | - | 6985929 | COG2851C   | citrate transporter                                                  |
| Spy49_0930  | -      | NE | 925799  | 926122  | 107  | + | 6985930 | -          | hypothetical protein Spy49_0930                                      |
| Spy49_0933  | -      | NE | 926611  | 927732  | 373  | + | 6985931 | COG1883C   | Oxaloacetate decarboxylase subunit beta                              |
| Spy49_0934  | citD   | NE | 927920  | 928228  | 102  | + | 6985932 | COG3052C   | citrate lyase subunit gamma                                          |
| Spy49_0936  | citE   | NC | 928216  | 929103  | 295  | + | 6985933 | COG2301G   | citrate lyase subunit beta                                           |
| Spy49_0937  | citF   | NE | 929106  | 930638  | 510  | + | 6985934 | COG3051C   | citrate lyase subunit alpha                                          |
| Spy49_0938  | citX   | NE | 930355  | 931209  | 224  | + | 6985935 | COG3697HI  | 2\'-(5\'-triphosphoribosyl)-3\'-dephospho-CoA:apo-citrate lyase      |
| Spy49_0939  | oadA   | NE | 931224  | 932618  | 464  | + | 6985936 | COG5016C   | oxaloacetate decarboxylase                                           |
| Spy49_0940c | citC   | NE | 932729  | 933781  | 350  | - | 6985937 | COG3053C   | citrate (pro-3S)-lyase ligase                                        |
| Spy49_0942c | -      | NE | 933968  | 934351  | 127  | - | 6985938 | -          | hypothetical protein Spy49_0942c                                     |
| Spy49_0943c | xerS   | C  | 935045  | 936115  | 356  | - | 6985939 | COG4974L   | site-specific tyrosine recombinase XerS                              |
| Spy49_0944  | -      | NE | 936585  | 937283  | 232  | + | 6985940 | COG2932K   | repressor protein                                                    |
| Spy49_0945c | ffh    | E  | 937400  | 938962  | 520  | - | 6985941 | COG0541U   | signal recognition particle subunit Ffh SRP54                        |
| Spy49_0946c | -      | NC | 938977  | 939318  | 113  | - | 6985942 | COG2739S   | DNA-binding protein                                                  |
| Spy49_0947c | -      | NE | 939407  | 940105  | 232  | - | 6985943 | COG2188K   | GntR family transcriptional regulator                                |
| Spy49_0948c | -      | NE | 940188  | 941477  | 429  | - | 6985944 | -          | hypothetical protein Spy49_0948c                                     |
| Spy49_0949  | guaA   | C  | 941789  | 943351  | 520  | + | 6985945 | COG0519F   | GMP synthase                                                         |
| Spy49_0951c | murM2  | NE | 943393  | 944604  | 403  | - | 6985946 | COG2348V   | antimicrobial resistance factor                                      |
| Spy49_0952c | -      | NE | 944959  | 946524  | 521  | - | 6985947 | COG0488R   | ABC transporter ATP-binding protein                                  |
| Spy49_0953c | -      | NE | 946637  | 947194  | 185  | - | 6985948 | COG4720S   | hypothetical protein Spy49_0953c                                     |
| Spy49_0954c | pdxK   | NE | 947172  | 948038  | 288  | - | 6985949 | COG2240H   | pyridoxamine kinase                                                  |
| Spy49_0955  | -      | NE | 948128  | 949396  | 422  | + | 6985950 | COG1167KE  | transcriptional regulator/aminotransferase                           |
| Spy49_0957c | -      | NE | 949867  | 950223  | 118  | - | 6985951 | COG1328F   | anaerobic ribonucleotide reductase                                   |
| Spy49_0958c | -      | E  | 950545  | 952122  | 525  | - | 6985952 | COG1502I   | Cardiolipin synthetase                                               |
| Spy49_0959c | fhs1   | C  | 952207  | 953877  | 556  | - | 6985953 | COG2759F   | formate--tetrahydrofolate ligase                                     |
| Spy49_0960c | lplA   | NE | 954005  | 955024  | 339  | - | 6985954 | COG0095H   | Lipoate-protein ligase A                                             |
| Spy49_0961c | -      | NE | 955071  | 955952  | 293  | - | 6985955 | COG0846K   | hypothetical protein Spy49_0961c                                     |
| Spy49_0962c | -      | NE | 955945  | 956757  | 270  | - | 6985956 | COG2110R   | hypothetical protein Spy49_0962c                                     |
| Spy49_0963c | -      | NE | 956750  | 957082  | 110  | - | 6985957 | COG0509E   | glycine cleavage system H protein                                    |
| Spy49_0964c | -      | NE | 957124  | 958122  | 332  | - | 6985958 | COG2141C   | hypothetical protein Spy49_0964c                                     |
| Spy49_0965c | -      | NE | 958119  | 959318  | 399  | - | 6985959 | COG1902C   | trimethylamine dehydrogenase                                         |
| Spy49_0966c | -      | NE | 959315  | 960151  | 278  | - | 6985960 | COG0095H   | Lipoate-protein ligase A                                             |
| Spy49_0967  | dpfB   | E  | 960347  | 961039  | 230  | + | 6985961 | COG0452H   | phosphopantothenate--cysteine ligase                                 |
| Spy49_0968  | dpf    | E  | 961032  | 961577  | 181  | + | 6985962 | COG0452H   | phosphopantothenoylcysteine decarboxylase                            |
| Spy49_0969  | -      | C  | 961636  | 962205  | 189  | + | 6985963 | COG4684S   | hypothetical protein Spy49_0969                                      |
| Spy49_0970  | pgmA   | E  | 962381  | 964099  | 572  | + | 6985964 | COG1109G   | phosphoglucomutase                                                   |
| Spy49_0971c | -      | NE | 964312  | 965268  | 318  | - | 6985965 | COG1079R   | sugar ABC transporter                                                |
| Spy49_0972c | -      | NE | 965270  | 966334  | 354  | - | 6985966 | COG4603R   | sugar ABC transporter                                                |
| Spy49_0973c | -      | NE | 966327  | 967859  | 510  | - | 6985967 | COG3845R   | sugar ABC transporter                                                |
| Spy49_0974c | -      | NE | 967998  | 969050  | 350  | - | 6985968 | COG1744R   | lipoprotein                                                          |
| Spy49_0975c | cdd    | NE | 969144  | 969533  | 129  | - | 6985969 | COG0295F   | cytidine deaminase                                                   |
| Spy49_0976c | -      | NE | 970186  | 970779  | 197  | - | 6985970 | COG2813J   | hypothetical protein Spy49_0976c                                     |
| Spy49_0977  | coaA   | E  | 971047  | 971967  | 306  | + | 6985971 | COG1072H   | pantothenate kinase                                                  |
| Spy49_0978  | rpsT   | NC | 972036  | 972269  | 77   | + | 6985972 | COG0268J   | 30S ribosomal protein S20                                            |
| Spy49_0979c | ciaH   | C  | 972394  | 973704  | 436  | - | 6985973 | COG2205T   | histidine kinase                                                     |
| Spy49_0980c | ciaR   | E  | 973697  | 974371  | 224  | - | 6985974 | COG0745TK  | CiaR family transcriptional regulator                                |
| Spy49_0981c | pepN   | NE | 974718  | 977255  | 845  | - | 6985975 | COG0308E   | lysyl-aminopeptidase                                                 |
| Spy49_0982c | phoU   | NE | 977460  | 978113  | 217  | - | 6985976 | COG0704P   | phosphate uptake regulatory protein                                  |
| Spy49_0983c | pstB   | NC | 978182  | 978940  | 252  | - | 6985977 | COG1117P   | phosphate transporter ATP-binding protein                            |
| Spy49_0984c | pstB2  | C  | 978953  | 979756  | 267  | - | 6985978 | COG1117P   | phosphate transporter ATP-binding protein                            |
| Spy49_0985c | pstA   | NC | 979772  | 980659  | 295  | - | 6985979 | COG0581P   | phosphate ABC transporter permease                                   |
| Spy49_0986  | pstC   | NC | 980649  | 981584  | 311  | - | 6985980 | COG0573P   | phosphate ABC transporter permease                                   |
| Spy49_0987c | pstS   | NC | 981595  | 982461  | 288  | - | 6985981 | COG0226P   | phosphate ABC transporter periplasmic phosphate-binding protein pstS |
| Spy49_0988c | -      | E  | 982600  | 983910  | 436  | - | 6985982 | COG0144J   | nucleolar protein                                                    |
| Spy49_0989c | -      | NE | 983913  | 984701  | 262  | - | 6985983 | COG0483G   | Myo-inositol-1(or 4)-monophosphatase                                 |
| Spy49_0990c | -      | NE | 984691  | 984969  | 92   | - | 6985984 | COG4476S   | hypothetical protein Spy49_0990c                                     |
| Spy49_0991c | spxA   | NE | 984971  | 985375  | 134  | - | 6985985 | COG1393P   | transcriptional regulator Spx                                        |
| Spy49_0992c | -      | E  | 985418  | 986350  | 310  | - | 6985986 | COG0196H   | bifunctional riboflavin kinase/FMN adenylyltransferase               |
| Spy49_0993c | truB   | NE | 986340  | 987263  | 307  | - | 6985987 | COG0130J   | tRNA pseudouridine synthase B                                        |
| Spy49_0994c | -      | NE | 987379  | 988719  | 446  | - | 6985988 | COG4487S   | hypothetical protein Spy49_0994c                                     |
| Spy49_0995c | -      | NE | 988816  | 989772  | 318  | - | 6985989 | COG4129S   | hypothetical protein Spy49_0995c                                     |
| Spy49_0996c | -      | NE | 989783  | 990379  | 198  | - | 6985990 | COG0732V   | hypothetical protein Spy49_0996c                                     |
| Spy49_0997c | -      | NE | 990471  | 993107  | 878  | - | 6985991 | COG0577V   | ABC transporter permease                                             |
| Spy49_0998c | -      | NE | 993122  | 993823  | 233  | - | 6985992 | COG1136V   | ABC transporter                                                      |
| Spy49_0999  | -      | NE | 993941  | 994483  | 180  | + | 6985993 | COG1309K   | TetR family transcriptional regulator                                |
| Spy49_1000c | -      | NE | 994638  | 995267  | 209  | - | 6985994 | COG0490P   | transcriptional regulator                                            |
| Spy49_1001c | -      | NE | 995430  | 995918  | 162  | - | 6985995 | COG1302S   | hypothetical protein Spy49_1001c                                     |
| Spy49_1002c | -      | NE | 995929  | 996129  | 66   | - | 6985996 | COG3237S   | hypothetical protein Spy49_1002c                                     |
| Spy49_1003c | -      | NE | 996170  | 996709  | 179  | - | 6985997 | COG1302S   | hypothetical protein Spy49_1003c                                     |
| Spy49_1004c | -      | NC | 996722  | 996910  | 62   | - | 6985998 | COG5547S   | hypothetical protein Spy49_1004c                                     |
| Spy49_1005c | -      | NE | 996921  | 997508  | 195  | - | 6985999 | -          | hypothetical protein Spy49_1005c                                     |
| Spy49_1006c | -      | NE | 997569  | 997817  | 82   | - | 6986000 | COG2261S   | hypothetical protein Spy49_1006c                                     |
| Spy49_1007c | pcrA   | E  | 998180  | 1000498 | 772  | - | 6986001 | COG0210L   | ATP-dependent DNA helicase                                           |
| Spy49_1008  | -      | NC | 1001027 | 1002349 | 440  | + | 6986002 | COG1115E   | amino acid symporter                                                 |
| Spy49_1009  | -      | NE | 1002469 | 1003704 | 411  | + | 6986003 | COG0053P   | cation efflux system protein                                         |
| Spy49_1010c | cfa    | NE | 1004074 | 1004847 | 257  | - | 6986004 | -          | CAMP factor                                                          |
| Spy49_1011c | -      | NE | 1005217 | 1006053 | 278  | - | 6986005 | COG0834ET  | amino acid ABC transporter substrate-binding protein                 |
| Spy49_1012c | -      | NE | 1006069 | 1006698 | 209  | - | 6986006 | COG1126E   | amino acid ABC transporter ATP-binding protein                       |
| Spy49_1013c | -      | NE | 1006708 | 1007349 | 213  | - | 6986007 | COG0765E   | amino acid ABC transporter permease                                  |
| Spy49_1014c | -      | NE | 1007456 | 1007791 | 111  | - | 6986008 | COG2824P   | PhnA protein                                                         |
| Spy49_1015c | glmS   | E  | 1007987 | 1009801 | 604  | - | 6986009 | COG0449M   | glucosamine--fructose-6-phosphate aminotransferase                   |
| Spy49_1016c | sipC   | NE | 1009977 | 1010534 | 185  | - | 6986010 | COG0681U   | signal peptidase I                                                   |
| Spy49_1017c | pyk    | E  | 1010752 | 1012254 | 500  | - | 6986011 | COG0469G   | pyruvate kinase                                                      |
| Spy49_1018c | pfk    | E  | 1012317 | 1013330 | 337  | - | 6986012 | COG0205G   | 6-phosphofruktokinase                                                |
| Spy49_1019c | dnaE   | E  | 1013410 | 1016520 | 1036 | - | 6986013 | COG0587L   | DNA polymerase III DnaE                                              |
| Spy49_1020  | -      | NE | 1016705 | 1017076 | 123  | + | 6986014 | COG1725K   | GntR family transcriptional regulator                                |
| Spy49_1021  | -      | C  | 1017076 | 1017774 | 232  | + | 6986015 | COG1131V   | ABC transporter                                                      |
| Spy49_1022  | -      | C  | 1017784 | 1018569 | 261  | + | 6986016 | -          | hypothetical protein Spy49_1022                                      |

|             |       |    |         |         |     |   |         |            |                                                                                 |
|-------------|-------|----|---------|---------|-----|---|---------|------------|---------------------------------------------------------------------------------|
| Spy49_1023c | -     | E  | 1018706 | 1019311 | 201 | - | 6986017 | COG0398S   | hypothetical protein Spy49_1023c                                                |
| Spy49_1024  | -     | NE | 1020050 | 1020670 | 206 | + | 6986019 | -          | hypothetical protein Spy49_1024                                                 |
| Spy49_1025c | glgP  | NE | 1020927 | 1023191 | 754 | - | 6986020 | COG0058G   | glycogen phosphorylase                                                          |
| Spy49_1026c | malQ  | NE | 1023226 | 1024719 | 497 | - | 6986021 | COG1640G   | 4-alpha-glucanotransferase                                                      |
| Spy49_1027c | malR  | NE | 1024834 | 1025853 | 339 | - | 6986022 | COG1609K   | maltose operon transcriptional repressor                                        |
| Spy49_1028  | malE  | NE | 1026097 | 1027344 | 415 | + | 6986023 | COG2182G   | maltose maltodextrin ABC transporter substrate binding periplasmic protein malE |
| Spy49_1029  | malF  | NE | 1027618 | 1028979 | 453 | + | 6986024 | COG1175G   | maltose ABC transporter permease                                                |
| Spy49_1030  | malG  | NE | 1028979 | 1029815 | 278 | + | 6986025 | COG3833G   | maltose AVC transporter permease                                                |
| Spy49_1032  | -     | NE | 1031207 | 1031431 | 74  | + | 6986027 | -          | transposase for insertion-like sequence element IS1161                          |
| Spy49_1033c | -     | NE | 1031496 | 1032479 | 327 | - | 6986028 | COG0657I   | esterase                                                                        |
| Spy49_1034c | ditD  | NE | 1032510 | 1033760 | 416 | - | 6986029 | COG3966M   | Protein ditD                                                                    |
| Spy49_1035c | ditC  | NE | 1033753 | 1033992 | 79  | - | 6986030 | COG0236IQ  | D-alanine-poly(phosphoribitol) ligase subunit 2                                 |
| Spy49_1036c | ditB  | NC | 1034010 | 1035266 | 418 | - | 6986031 | COG1696M   | hypothetical protein Spy49_1036c                                                |
| Spy49_1037c | ditA  | NC | 1035263 | 1036801 | 512 | - | 6986032 | COG1020Q   | D-alanine-poly(phosphoribitol) ligase subunit 1                                 |
| Spy49_1038c | -     | NC | 1036813 | 1036956 | 47  | - | 6986033 | -          | hypothetical protein Spy49_1038c                                                |
| Spy49_1039c | uvrB  | NE | 1037219 | 1039210 | 663 | - | 6986034 | COG0556L   | excinuclease ABC subunit B                                                      |
| Spy49_1040  | glnP  | C  | 1039403 | 1041577 | 724 | + | 6986035 | COG0765E   | glutamine ABC transporter glutamine-binding protein/permease                    |
| Spy49_1041  | glnQ  | C  | 1041577 | 1042317 | 246 | + | 6986036 | COG1126E   | glutamine transport ATP-binding protein glnQ                                    |
| Spy49_1042c | -     | NC | 1042465 | 1042617 | 50  | - | 6986037 | -          | hypothetical protein Spy49_1042c                                                |
| Spy49_1043c | -     | NE | 1042614 | 1043993 | 459 | - | 6986038 | COG1455G   | PTS system IIC component                                                        |
| Spy49_1044c | -     | NE | 1044171 | 1044620 | 149 | - | 6986039 | -          | hypothetical protein Spy49_1044c                                                |
| Spy49_1045c | -     | NE | 1044617 | 1044952 | 111 | - | 6986040 | COG1447G   | PTS enzyme III                                                                  |
| Spy49_1046c | -     | NE | 1044955 | 1045266 | 103 | - | 6986041 | COG1440G   | PTS system enzyme II                                                            |
| Spy49_1047c | -     | NC | 1045289 | 1047283 | 664 | - | 6986042 | COG3711K   | transcriptional antiterminator                                                  |
| Spy49_1048c | -     | NE | 1047389 | 1048483 | 364 | - | 6986043 | COG3589S   | hypothetical protein Spy49_1048c                                                |
| Spy49_1049c | -     | NE | 1048492 | 1049892 | 466 | - | 6986044 | COG2723G   | beta-glucosidase                                                                |
| Spy49_1050  | -     | NE | 1050117 | 1050812 | 231 | + | 6986045 | COG3201H   | ribosyl nicotinamide transporter                                                |
| Spy49_1051c | -     | NC | 1050817 | 1050975 | 52  | - | 6986046 | -          | hypothetical protein Spy49_1051c                                                |
| Spy49_1053c | obgE  | E  | 1051044 | 1052357 | 437 | - | 6986047 | COG0536R   | GTPase ObgE                                                                     |
| Spy49_1054  | -     | NE | 1052786 | 1053181 | 131 | + | 6986048 | COG2963L   | hypothetical protein Spy49_1054                                                 |
| Spy49_1055  | -     | NE | 1053321 | 1054199 | 292 | + | 6986049 | COG2801L   | transposase, IS861                                                              |
| Spy49_1056  | -     | NE | 1054597 | 1055097 | 166 | + | 6986050 | COG2963L   | hypothetical protein Spy49_1056                                                 |
| Spy49_1057  | -     | NE | 1055100 | 1055906 | 268 | + | 6986051 | COG2801L   | transposase, IS861                                                              |
| Spy49_1059  | -     | NE | 1057303 | 1058613 | 436 | + | 6986052 | COG0471P   | integral membrane protein                                                       |
| Spy49_1060  | -     | NC | 1058770 | 1058985 | 71  | + | 6986053 | -          | hypothetical protein Spy49_1060                                                 |
| Spy49_1062  | -     | NE | 1059129 | 1059314 | 61  | + | 6986054 | -          | Insertion element iso-IS904 coding for a transposase                            |
| Spy49_1064c | rsuA  | NC | 1059757 | 1060488 | 243 | - | 6986055 | COG1187J   | 16S pseudouridylylase synthase                                                  |
| Spy49_1065  | -     | NE | 1060603 | 1060968 | 121 | + | 6986056 | COG5496R   | hypothetical protein Spy49_1065                                                 |
| Spy49_1066c | -     | NE | 1061088 | 1062308 | 406 | - | 6986057 | COG2814G   | hypothetical protein Spy49_1066c                                                |
| Spy49_1067  | -     | NE | 1062720 | 1064165 | 481 | + | 6986058 | COG4868S   | hypothetical protein Spy49_1067                                                 |
| Spy49_1070c | -     | NE | 1064270 | 1064671 | 133 | - | 6986059 | COG2050Q   | phenylacetic acid degradation protein Paal                                      |
| Spy49_1071c | -     | NE | 1064835 | 1065269 | 144 | - | 6986060 | COG2820F   | Uridine phosphorylase                                                           |
| Spy49_1072c | -     | NE | 1065688 | 1067046 | 452 | - | 6986061 | COG2265J   | RNA methyltransferase                                                           |
| Spy49_1073c | psr   | NE | 1067128 | 1068579 | 483 | - | 6986062 | COG1316K   | PBP 5 synthesis repressor                                                       |
| Spy49_1074c | aroK  | NE | 1068787 | 1069278 | 163 | - | 6986063 | COG0703E   | shikimate kinase                                                                |
| Spy49_1075c | aroA1 | NE | 1069271 | 1070554 | 427 | - | 6986064 | COG0128E   | 3-phosphoshikimate 1-carboxyvinyltransferase                                    |
| Spy49_1076c | -     | NE | 1070665 | 1071630 | 321 | - | 6986065 | COG1295S   | ribonuclease BN                                                                 |
| Spy49_1077c | map   | E  | 1071632 | 1072492 | 286 | - | 6986066 | COG0024J   | methionine aminopeptidase                                                       |
| Spy49_1078c | -     | NC | 1072508 | 1073791 | 427 | - | 6986067 | COG4109K   | hypothetical protein Spy49_1078c                                                |
| Spy49_1079c | -     | NE | 1073800 | 1074342 | 180 | - | 6986068 | COG1670J   | acetyl transferase                                                              |
| Spy49_1080c | grab  | NE | 1074609 | 1075148 | 179 | - | 6986069 | -          | Protein G-related alpha 2 macroglobulin-binding protein (GRAB)                  |
| Spy49_1082c | murZ  | NE | 1075506 | 1076765 | 419 | - | 6986070 | COG0766M   | UDP-N-acetylglucosamine 1-carboxyvinyltransferase                               |
| Spy49_1083c | metK  | E  | 1076939 | 1078135 | 398 | - | 6986071 | COG0192H   | S-adenosylmethionine synthetase                                                 |
| Spy49_1084c | inlA  | NE | 1078672 | 1081050 | 792 | - | 6986072 | COG4886S   | internalin                                                                      |
| Spy49_1085  | birA  | E  | 1081425 | 1082195 | 256 | + | 6986073 | COG0340H   | Biotin-protein ligase / Biotin operon repressor                                 |
| Spy49_1086c | -     | NE | 1082170 | 1082373 | 67  | - | 6986074 | -          | hypothetical protein Spy49_1086c                                                |
| Spy49_1087c | dnaX  | E  | 1082469 | 1084139 | 556 | - | 6986075 | COG2812L   | DNA polymerase III subunits gamma/tau                                           |
| Spy49_1088c | -     | NE | 1084139 | 1084636 | 165 | - | 6986076 | COG1956T   | hypothetical protein Spy49_1088c                                                |
| Spy49_1089  | -     | NE | 1084842 | 1085591 | 249 | + | 6986077 | COG2339S   | hypothetical protein Spy49_1089                                                 |
| Spy49_1090c | udk   | NE | 1085989 | 1086615 | 208 | - | 6986078 | COG0572F   | uridine kinase                                                                  |
| Spy49_1091  | deaD2 | NE | 1086713 | 1087798 | 361 | + | 6986079 | COG0513LKJ | RNA helicase                                                                    |
| Spy49_1092c | -     | NE | 1087909 | 1089183 | 424 | - | 6986080 | COG0726G   | polysaccharide deacetylase                                                      |
| Spy49_1093c | gapN  | E  | 1089304 | 1090707 | 467 | - | 6986081 | COG1012C   | glyceraldehyde-3-phosphate dehydrogenase (NADP)                                 |
| Spy49_1094c | ptsl  | C  | 1090892 | 1092625 | 577 | - | 6986082 | COG1080G   | phosphoenolpyruvate-protein phosphotransferase of PTS system                    |
| Spy49_1095c | ptsH  | NC | 1092630 | 1092893 | 87  | - | 6986083 | COG1925G   | phosphocarrier protein HPr                                                      |
| Spy49_1096  | nrhH  | NE | 1093253 | 1093504 | 83  | + | 6986084 | COG0695O   | glutaredoxin                                                                    |
| Spy49_1097  | nrhE1 | NE | 1093524 | 1095683 | 719 | + | 6986085 | COG0209F   | ribonucleotide-diphosphate reductase subunit alpha                              |
| Spy49_1098  | nrhF1 | NE | 1095664 | 1095981 | 105 | + | 6986086 | -          | hypothetical protein Spy49_1098                                                 |
| Spy49_1099  | nrhF  | NE | 1096016 | 1096975 | 319 | + | 6986087 | COG0208F   | ribonucleotide-diphosphate reductase subunit beta                               |
| Spy49_1100  | -     | NE | 1096950 | 1098263 | 437 | + | 6986088 | COG0038P   | chloride channel protein                                                        |
| Spy49_1101  | -     | NC | 1098401 | 1098694 | 97  | + | 6986089 | COG2963L   | hypothetical protein Spy49_1101                                                 |
| Spy49_1103  | -     | NC | 1099127 | 1099297 | 56  | + | 6986090 | -          | transposase                                                                     |
| Spy49_1104  | -     | NE | 1099337 | 1099558 | 73  | + | 6986091 | COG2801L   | transposase                                                                     |
| Spy49_1105c | -     | NE | 1099651 | 1100346 | 231 | - | 6986092 | COG1266R   | hypothetical protein Spy49_1105c                                                |
| Spy49_1106c | -     | NE | 1100365 | 1101126 | 253 | - | 6986093 | -          | hypothetical protein Spy49_1106c                                                |
| Spy49_1107c | -     | NE | 1101123 | 1101353 | 76  | - | 6986094 | COG1476K   | Cro/Ci family transcriptional regulator                                         |
| Spy49_1108c | alaS  | E  | 1101699 | 1104317 | 872 | - | 6986095 | COG0013J   | alanyl-tRNA synthetase                                                          |
| Spy49_1109c | prsA  | NE | 1104704 | 1105759 | 351 | - | 6986096 | COG0760O   | foldase PrsA                                                                    |
| Spy49_1110c | -     | NE | 1105822 | 1106529 | 235 | - | 6986097 | COG4122R   | methyltransferase                                                               |
| Spy49_1111c | -     | NE | 1106595 | 1107791 | 398 | - | 6986098 | COG2814G   | oxalate:formate antiporter                                                      |
| Spy49_1112c | pepB  | NE | 1108168 | 1109973 | 601 | - | 6986099 | COG1164E   | oligopeptidase PepB                                                             |
| Spy49_1113c | -     | NE | 1109986 | 1110948 | 320 | - | 6986100 | COG4469R   | transcription factor                                                            |
| Spy49_1114c | -     | NE | 1111245 | 1111961 | 238 | - | 6986101 | COG1187J   | 16S pseudouridylylase synthetase                                                |
| Spy49_1115c | nagB  | NE | 1112080 | 1112784 | 234 | - | 6986102 | COG0363G   | glucosamine-6-phosphate deaminase                                               |
| Spy49_1116  | queA  | NE | 1112986 | 1114014 | 342 | + | 6986103 | COG0809J   | S-adenosylmethionine:tRNA ribosyltransferase-isomerase                          |
| Spy49_1117  | -     | NE | 1114021 | 1115241 | 406 | + | 6986104 | -          | hypothetical protein Spy49_1117                                                 |
| Spy49_1119c | -     | NE | 1115355 | 1115945 | 196 | - | 6984357 | COG1686M   | hypothetical protein Spy49_1119c                                                |
| Spy49_1120c | -     | NE | 1115942 | 1116190 | 82  | - | 6984358 | -          | hypothetical protein Spy49_1120c                                                |
| Spy49_1121c | -     | NC | 1116175 | 1116402 | 75  | - | 6984359 | -          | hypothetical protein Spy49_1121c                                                |
| Spy49_1122c | sodM  | NE | 1116524 | 1117168 | 214 | - | 6984360 | COG0605P   | superoxide dismutase                                                            |
| Spy49_1123c | holA  | E  | 1117265 | 1118305 | 346 | - | 6984361 | COG1466L   | DNA polymerase III subunit delta                                                |
| Spy49_1124c | comEC | NE | 1118376 | 1120619 | 747 | - | 6984362 | COG2333R   | DNA internalization-related competence protein ComEC/Rec2                       |
| Spy49_1126c | comE  | NE | 1120600 | 1121262 | 220 | - | 6984363 | COG1555L   | competence protein                                                              |
| Spy49_1127c | -     | E  | 1121462 | 1122202 | 246 | - | 6984364 | COG0204I   | 1-acyl-sn-glycerol-3-phosphate acyltransferase                                  |
| Spy49_1128  | -     | NE | 1122242 | 1123096 | 284 | + | 6984365 | COG4123R   | hypothetical protein Spy49_1128                                                 |
| Spy49_1129  | -     | NE | 1123086 | 1123364 | 92  | + | 6984366 | COG2827L   | hypothetical protein Spy49_1129                                                 |
| Spy49_1130c | kup   | NE | 1123388 | 1125388 | 666 | - | 6984367 | COG3158P   | potassium uptake protein                                                        |
| Spy49_1132c | deaD1 | NE | 1125516 | 1127135 | 539 | - | 6984368 | COG0513LKJ | ATP-dependent RNA helicase                                                      |
| Spy49_1133c | prfC  | NE | 1127442 | 1128986 | 514 | - | 6984369 | COG4108J   | peptide chain release factor 3                                                  |
| Spy49_1135c | -     | NE | 1129234 | 1129929 | 231 | - | 6984370 | COG5522S   | hypothetical protein Spy49_1135c                                                |
| Spy49_1136c | murF  | E  | 1130009 | 1131400 | 463 | - | 6984371 | COG0770M   | UDP-N-acetylmuramoyl-tripeptide-D-alanyl-D-alanine ligase                       |
| Spy49_1137c | ddl   | E  | 1131591 | 1132637 | 348 | - | 6984372 | COG1181M   | D-alanyl-alanine synthetase A                                                   |
| Spy49_1138c | recR  | C  | 1132738 | 1133334 | 198 | - | 6984373 | COG0353L   | recombination protein RecR                                                      |
| Spy49_1139c | -     | NE | 1133381 | 1133572 | 63  | - | 6984374 | -          | hypothetical protein Spy49_1139c                                                |
| Spy49_1140c | fdhC  | NE | 1134132 | 1134947 | 271 | - | 6984375 | COG2116P   | formate/nitrite transporter family member                                       |
| Spy49_1141c | -     | NE | 1135034 | 1135576 | 180 | - | 6984376 | -          | hypothetical protein Spy49_1141c                                                |
| Spy49_1142c | -     | NE | 1135737 | 1136258 | 173 | - | 6984377 | COG1827R   | transcriptional regulator, biotin repressor family                              |



|             |        |    |         |         |      |   |         |           |                                                                                                          |
|-------------|--------|----|---------|---------|------|---|---------|-----------|----------------------------------------------------------------------------------------------------------|
| Spy49_1143c | gpmA   | E  | 1136365 | 1137060 | 231  | - | 6984378 | COG0588G  | phosphoglyceromutase                                                                                     |
| Spy49_1144  | pyrD   | NE | 1137357 | 1138238 | 293  | + | 6984379 | COG0167F  | dihydroorotate dehydrogenase 1A                                                                          |
| Spy49_1145c | -      | NC | 1138293 | 1138466 | 57   | - | 6984380 | -         | hypothetical protein Spy49_1145c                                                                         |
| Spy49_1146c | cadA   | NC | 1138538 | 1140400 | 620  | - | 6984381 | COG2217P  | heavy metal-transporting ATPase                                                                          |
| Spy49_1147c | -      | NC | 1140732 | 1141007 | 91   | - | 6984382 | COG0776L  | DNA-binding protein HU                                                                                   |
| Spy49_1148c | -      | NE | 1141106 | 1141693 | 195  | - | 6984383 | COG4698S  | hypothetical protein Spy49_1148c                                                                         |
| Spy49_1149c | -      | NE | 1141671 | 1142513 | 280  | - | 6984384 | COG2755E  | Lipase/acylhydrolase                                                                                     |
| Spy49_1150c | -      | C  | 1142506 | 1143357 | 283  | - | 6984385 | COG1307S  | DegV family protein                                                                                      |
| Spy49_1151c | -      | NE | 1143573 | 1144529 | 313  | - | 6984386 | -         | hypothetical protein Spy49_1151c                                                                         |
| Spy49_1152c | recN   | NE | 1144701 | 1146362 | 558  | - | 6984387 | COG0497L  | DNA repair and genetic recombination protein                                                             |
| Spy49_1153c | -      | NE | 1146383 | 1146853 | 156  | - | 6984388 | COG1438K  | repressor protein                                                                                        |
| Spy49_1154c | -      | NE | 1146840 | 1147667 | 275  | - | 6984389 | COG1189J  | hemolysin                                                                                                |
| Spy49_1155c | fps    | NE | 1147867 | 1148532 | 221  | - | 6984390 | COG0142H  | Octaprenyl-diphosphate synthase / Dimethylallyltransferase / Geranyltransferase / Geranylgerany...       |
| Spy49_1156c | xseB   | NE | 1148532 | 1148747 | 71   | - | 6984391 | COG1722L  | exodeoxyribonuclease VII small subunit                                                                   |
| Spy49_1157c | xseA   | NE | 1148725 | 1150065 | 446  | - | 6984392 | COG1570L  | exodeoxyribonuclease VII large subunit                                                                   |
| Spy49_1158c | folD   | NC | 1150218 | 1151072 | 284  | - | 6984393 | COG0190H  | bifunctional 5,10-methylene-tetrahydrofolate dehydrogenase/ 5,10-methylene-tetrahydrofolate cyclohydr... |
| Spy49_1159c | -      | NE | 1151280 | 1152974 | 564  | - | 6984394 | COG1109G  | phosphoglucomutase/phosphomannomutase                                                                    |
| Spy49_1160c | phr    | NE | 1153152 | 1154561 | 469  | - | 6984395 | COG0415L  | deoxyribodipyrimidine photolase                                                                          |
| Spy49_1161c | gtr    | NE | 1154710 | 1155444 | 244  | - | 6984396 | COG1126E  | amino acid ABC transporter                                                                               |
| Spy49_1162c | -      | NE | 1155444 | 1156130 | 228  | - | 6984397 | COG0765E  | amino acid ABC transporter                                                                               |
| Spy49_1163c | -      | NC | 1156257 | 1156487 | 76   | - | 6984398 | COG4703S  | hypothetical protein Spy49_1163c                                                                         |
| Spy49_1164  | clpE   | NE | 1156785 | 1159067 | 760  | + | 6984399 | COG0542O  | ATP-dependent protease                                                                                   |
| Spy49_1165  | nutT   | NE | 1159195 | 1159650 | 151  | + | 6984400 | COG0494LR | MutT/nudix family protein                                                                                |
| Spy49_1166  | -      | NE | 1159701 | 1160003 | 100  | + | 6984401 | -         | hypothetical protein Spy49_1166                                                                          |
| Spy49_1167c | ileS   | E  | 1160268 | 1163024 | 918  | - | 6984402 | COG0060J  | isoleucyl-tRNA synthetase                                                                                |
| Spy49_1168c | divIVA | NC | 1163342 | 1164100 | 252  | - | 6984403 | COG3599D  | cell-division initiation protein                                                                         |
| Spy49_1169c | -      | NE | 1164110 | 1164901 | 263  | - | 6984404 | COG2302S  | hypothetical protein Spy49_1169c                                                                         |
| Spy49_1170c | -      | NE | 1164901 | 1165155 | 84   | - | 6984405 | COG0762S  | YGGT family protein                                                                                      |
| Spy49_1171c | -      | C  | 1165160 | 1165828 | 222  | - | 6984406 | COG1799S  | hypothetical protein Spy49_1171c                                                                         |
| Spy49_1172c | -      | NE | 1165828 | 1166499 | 223  | - | 6984407 | COG0325R  | hypothetical protein Spy49_1172c                                                                         |
| Spy49_1173c | ftsZ   | E  | 1166502 | 1167821 | 439  | - | 6984408 | COG0206D  | cell division protein FtsZ                                                                               |
| Spy49_1174c | ftsA   | E  | 1167845 | 1169209 | 454  | - | 6984409 | COG0849D  | cell division protein FtsA                                                                               |
| Spy49_1175c | ftsQ   | E  | 1169420 | 1170568 | 382  | - | 6984410 | COG1589M  | cell division protein FtsQ                                                                               |
| Spy49_1176c | murG   | E  | 1170569 | 1171651 | 360  | - | 6984411 | COG0707M  | undecaprenyldiphospho-muramoylpentapeptide beta-N- acetylglucosaminyltransferase                         |
| Spy49_1177c | murD   | E  | 1171651 | 1173009 | 452  | - | 6984412 | COG0771M  | UDP-N-acetylmuramoyl-L-alanyl-D-glutamate synthetase                                                     |
| Spy49_1178c | -      | NE | 1173365 | 1173616 | 83   | - | 6984413 | -         | hypothetical protein Spy49_1178c                                                                         |
| Spy49_1179c | -      | NE | 1173738 | 1175579 | 613  | - | 6984414 | COG1217T  | GTP-binding protein TypA/BipA                                                                            |
| Spy49_1180c | -      | NE | 1175762 | 1176151 | 129  | - | 6984415 | COG0607P  | hypothetical protein Spy49_1180c                                                                         |
| Spy49_1181c | -      | NE | 1176161 | 1177132 | 323  | - | 6984416 | COG1940KG | glucokinase                                                                                              |
| Spy49_1182c | -      | NE | 1177137 | 1177340 | 67   | - | 6984417 | COG4483S  | hypothetical protein Spy49_1182c                                                                         |
| Spy49_1183c | -      | NE | 1177482 | 1178009 | 175  | - | 6984418 | COG0783P  | peroxide resistance protein                                                                              |
| Spy49_1184  | -      | NE | 1178237 | 1178863 | 208  | + | 6984419 | -         | Type IV prepeilin peptidase-like protein                                                                 |
| Spy49_1185c | -      | NE | 1178945 | 1180024 | 359  | - | 6984420 | COG0820R  | ribosomal RNA large subunit methyltransferase N                                                          |
| Spy49_1186c | -      | NE | 1180028 | 1180648 | 206  | - | 6984421 | COG4470S  | hypothetical protein Spy49_1186c                                                                         |
| Spy49_1187c | -      | NE | 1181096 | 1182073 | 325  | - | 6984422 | COG1609K  | ribose operon repressor                                                                                  |
| Spy49_1188c | -      | NE | 1182487 | 1183524 | 345  | - | 6984423 | COG3480T  | ATP-dependent protease La                                                                                |
| Spy49_1189c | coaD   | E  | 1183511 | 1184002 | 163  | - | 6984424 | COG0669H  | phosphopantetheine adenylyltransferase                                                                   |
| Spy49_1190c | -      | NE | 1183992 | 1184531 | 179  | - | 6984425 | COG0742L  | hypothetical protein Spy49_1190c                                                                         |
| Spy49_1191c | asnA   | NE | 1184654 | 1185646 | 330  | - | 6984426 | COG2502E  | asparagine synthetase AsnA                                                                               |
| Spy49_1192c | arcC   | NC | 1185959 | 1186909 | 316  | - | 6984427 | COG0549E  | carbamate kinase                                                                                         |
| Spy49_1193c | -      | NE | 1186929 | 1188260 | 443  | - | 6984428 | COG0624E  | hypothetical protein Spy49_1193c                                                                         |
| Spy49_1194c | -      | NE | 1188277 | 1189578 | 433  | - | 6984429 | COG1288S  | hypothetical protein Spy49_1194c                                                                         |
| Spy49_1195c | arcB   | NC | 1189941 | 1190954 | 337  | - | 6984430 | COG0078E  | ornithine carbamoyltransferase                                                                           |
| Spy49_1196c | -      | NE | 1190979 | 1191419 | 146  | - | 6984431 | COG2153R  | hypothetical protein Spy49_1196c                                                                         |
| Spy49_1197c | arcA   | NE | 1191519 | 1192754 | 411  | - | 6984432 | COG2235E  | arginine deiminase                                                                                       |
| Spy49_1198c | -      | NE | 1193028 | 1193708 | 226  | - | 6984433 | COG0664T  | Crp/Fnr family transcriptional regulator                                                                 |
| Spy49_1199  | argR   | NE | 1193850 | 1194323 | 157  | + | 6984434 | COG1438K  | arginine repressor                                                                                       |
| Spy49_1200c | -      | NE | 1194490 | 1195206 | 238  | - | 6984435 | COG3382S  | hypothetical protein Spy49_1200c                                                                         |
| Spy49_1201c | -      | NE | 1195220 | 1196299 | 359  | - | 6984436 | COG2315S  | hypothetical protein Spy49_1201c                                                                         |
| Spy49_1202c | yesM   | NE | 1196372 | 1198105 | 577  | - | 6984437 | COG2972T  | two-component sensor histidine kinase                                                                    |
| Spy49_1203c | yesN   | NE | 1198102 | 1198842 | 246  | - | 6984438 | COG4753T  | two-component response regulator                                                                         |
| Spy49_1204c | msrA1  | NE | 1198930 | 1200036 | 368  | - | 6984439 | COG0225O  | peptide methionine sulfoxide reductase msrA/msrB                                                         |
| Spy49_1205c | -      | NE | 1200079 | 1200702 | 207  | - | 6984440 | COG1225O  | hypothetical protein Spy49_1205c                                                                         |
| Spy49_1206c | ccdA   | NE | 1200715 | 1201404 | 229  | - | 6984441 | COG0785O  | cytochrome C biogenesis protein                                                                          |
| Spy49_1207c | -      | NE | 1202097 | 1202390 | 97   | - | 6984442 | COG1343L  | hypothetical protein Spy49_1207c                                                                         |
| Spy49_1208c | -      | NE | 1202401 | 1203426 | 341  | - | 6984443 | COG1518L  | hypothetical protein Spy49_1208c                                                                         |
| Spy49_1209c | -      | NE | 1203423 | 1204097 | 224  | - | 6984444 | COG1468L  | hypothetical protein Spy49_1209c                                                                         |
| Spy49_1210c | -      | NE | 1204099 | 1204947 | 282  | - | 6984445 | COG3649L  | hypothetical protein Spy49_1210c                                                                         |
| Spy49_1211c | -      | NC | 1204952 | 1206847 | 631  | - | 6984446 | -         | hypothetical protein Spy49_1211c                                                                         |
| Spy49_1212c | -      | NE | 1206847 | 1207575 | 242  | - | 6984447 | -         | hypothetical protein Spy49_1212c                                                                         |
| Spy49_1213c | -      | NE | 1207708 | 1210110 | 800  | - | 6984448 | COG1203R  | ATP-dependent RNA helicase SrmB                                                                          |
| Spy49_1215c | valS   | E  | 1210270 | 1212918 | 882  | - | 6984449 | COG0525J  | valyl-tRNA synthetase                                                                                    |
| Spy49_1216c | -      | NE | 1212920 | 1213483 | 187  | - | 6984450 | -         | hypothetical protein Spy49_1216c                                                                         |
| Spy49_1217c | -      | NC | 1213480 | 1213659 | 59   | - | 6984451 | COG1670J  | hypothetical protein Spy49_1217c                                                                         |
| Spy49_1218c | -      | NC | 1214086 | 1214481 | 131  | - | 6984452 | -         | hypothetical protein Spy49_1218c                                                                         |
| Spy49_1219c | -      | NC | 1214499 | 1214753 | 84   | - | 6984453 | -         | hypothetical protein Spy49_1219c                                                                         |
| Spy49_1220  | aroA2  | NE | 1215231 | 1215983 | 250  | + | 6984455 | COG2876E  | 3-deoxy-7-phosphoheptulonate synthase                                                                    |
| Spy49_1221  | aroB   | NE | 1216039 | 1217112 | 357  | + | 6984456 | COG0337E  | 3-dehydroquinate synthase                                                                                |
| Spy49_1222c | -      | NE | 1217548 | 1217853 | 101  | - | 6984457 | COG1917S  | acetate kinase                                                                                           |
| Spy49_1223c | -      | NE | 1217855 | 1218193 | 112  | - | 6984458 | COG1917S  | hypothetical protein Spy49_1223c                                                                         |
| Spy49_1224c | -      | NC | 1218246 | 1219001 | 251  | - | 6984459 | COG2226H  | ubiquinone/menaquinone biosynthesis methyltransferase UbiE/COQ5                                          |
| Spy49_1225c | aroE1  | NE | 1219236 | 1220114 | 292  | - | 6984460 | COG0169E  | Shikimate 5-dehydrogenase                                                                                |
| Spy49_1226c | -      | NE | 1220252 | 1223668 | 1138 | - | 6984461 | COG3250G  | beta-galactosidase                                                                                       |
| Spy49_1227c | -      | NE | 1223688 | 1225172 | 494  | - | 6984462 | COG4753T  | two-component sensor response regulator                                                                  |
| Spy49_1228c | -      | NE | 1225172 | 1226896 | 574  | - | 6984463 | COG2972T  | two-component sensor histidine kinase                                                                    |
| Spy49_1229c | -      | NE | 1226886 | 1227491 | 201  | - | 6984464 | COG5578S  | hypothetical protein Spy49_1229c                                                                         |
| Spy49_1230c | -      | NE | 1227797 | 1229242 | 481  | - | 6984465 | COG1653G  | ABC transporter substrate-binding protein                                                                |
| Spy49_1231c | -      | NC | 1229323 | 1230249 | 308  | - | 6984466 | COG0395G  | ABC transporter permease                                                                                 |
| Spy49_1233c | -      | NE | 1230259 | 1231209 | 316  | - | 6984467 | COG4209G  | sugar-binding transport protein                                                                          |
| Spy49_1234  | -      | NE | 1231405 | 1232100 | 231  | + | 6984468 | COG1940KG | transcriptional regulator                                                                                |
| Spy49_1235c | -      | NE | 1232893 | 1234335 | 480  | - | 6984469 | COG2723G  | beta-glucosidase                                                                                         |
| Spy49_1236c | hyl    | NC | 1234359 | 1236053 | 564  | - | 6984470 | -         | hyaluronidase                                                                                            |
| Spy49_1237c | -      | NE | 1236104 | 1237144 | 346  | - | 6984471 | COG1609K  | transcription regulator                                                                                  |
| Spy49_1238  | -      | NC | 1237277 | 1238563 | 428  | + | 6984472 | COG3538S  | hypothetical protein Spy49_1238                                                                          |
| Spy49_1239  | -      | NC | 1238578 | 1241283 | 901  | + | 6984473 | COG0383G  | Alpha-mannosidase                                                                                        |
| Spy49_1240c | -      | NE | 1241384 | 1242739 | 451  | - | 6984474 | COG2972T  | histidine kinase                                                                                         |
| Spy49_1241c | -      | NC | 1243405 | 1244760 | 451  | - | 6984475 | COG2265J  | TrmA family RNA methyltransferase                                                                        |
| Spy49_1242  | recX   | NE | 1244875 | 1245651 | 258  | + | 6984476 | COG2137R  | recombination regulator RecX                                                                             |
| Spy49_1243  | -      | NC | 1245731 | 1246264 | 177  | + | 6984477 | COG3557J  | hypothetical protein Spy49_1243                                                                          |
| Spy49_1244  | -      | NE | 1246634 | 1246912 | 92   | + | 6984478 | -         | hypothetical protein Spy49_1244                                                                          |
| Spy49_1245  | -      | C  | 1246927 | 1247034 | 35   | + | 6984479 | -         | hypothetical protein Spy49_1245                                                                          |
| Spy49_1247c | -      | NE | 1254000 | 1254548 | 182  | - | 6984490 | COG1544J  | ribosomal subunit Interface protein                                                                      |
| Spy49_1248c | comF   | NE | 1254628 | 1255293 | 221  | - | 6984491 | COG1040R  | late competence protein                                                                                  |
| Spy49_1249c | -      | NE | 1255265 | 1256590 | 441  | - | 6984492 | COG4098L  | late competence protein required for DNA uptake                                                          |
| Spy49_1250  | -      | NE | 1256646 | 1257278 | 210  | + | 6984493 | COG1739S  | hypothetical protein Spy49_1250                                                                          |
| Spy49_1251  | cysM   | NE | 1257406 | 1258347 | 313  | + | 6984494 | COG0031E  | cysteine synthase A                                                                                      |
| Spy49_1252c | -      | C  | 1258365 | 1258742 | 125  | - | 6984495 | COG1098J  | hypothetical protein Spy49_1252c                                                                         |

|             |       |    |         |         |     |   |         |            |                                                                                               |
|-------------|-------|----|---------|---------|-----|---|---------|------------|-----------------------------------------------------------------------------------------------|
| Spy49_1253c | -     | NE | 1258742 | 1260142 | 466 | - | 6984496 | COG06520   | Hydrolase, haloacid dehalogenase family/peptidyl-prolyl cis-trans isomerase, cyclophilin type |
| Spy49_1254c | -     | E  | 1260179 | 1260820 | 213 | - | 6984497 | COG2197TK  | two-component response regulator                                                              |
| Spy49_1255c | -     | NE | 1260813 | 1261817 | 334 | - | 6984498 | COG4585T   | two-component sensor histidine kinase                                                         |
| Spy49_1256c | -     | NE | 1261814 | 1262506 | 230 | - | 6984499 | COG4758S   | hypothetical protein Spy49_1256c                                                              |
| Spy49_1257c | -     | E  | 1262629 | 1264527 | 632 | - | 6984500 | COG2815S   | Serine/threonine protein kinase                                                               |
| Spy49_1259c | pppL  | E  | 1264524 | 1265264 | 246 | - | 6984501 | COG0631T   | phosphoprotein phosphatase                                                                    |
| Spy49_1260c | sunL  | NE | 1265302 | 1266624 | 440 | - | 6984502 | COG0144J   | RNA-binding Sun protein                                                                       |
| Spy49_1261c | fmt   | E  | 1266614 | 1267549 | 311 | - | 6984503 | COG0223J   | methionyl-tRNA formyltransferase                                                              |
| Spy49_1262c | priA  | C  | 1267611 | 1269995 | 794 | - | 6984504 | COG1198L   | primosome assembly protein PriA                                                               |
| Spy49_1263c | -     | NC | 1270060 | 1270377 | 105 | - | 6984505 | COG1758K   | DNA-directed RNA polymerase subunit omega                                                     |
| Spy49_1265c | gmK   | E  | 1270393 | 1271028 | 211 | - | 6984506 | COG0194F   | guanylate kinase                                                                              |
| Spy49_1266c | -     | NE | 1271138 | 1272745 | 535 | - | 6984507 | COG1418R   | hypothetical protein Spy49_1266c                                                              |
| Spy49_1267c | -     | NE | 1272875 | 1273771 | 298 | - | 6984508 | COG0583K   | transcriptional regulator                                                                     |
| Spy49_1268  | atoB  | NC | 1273972 | 1275159 | 395 | + | 6984509 | COG0183I   | acetyl-CoA acetyltransferase                                                                  |
| Spy49_1269  | atoD1 | NE | 1275183 | 1275833 | 216 | + | 6984510 | COG1788I   | acetyl-CoA:acetoacetyl-CoA transferase A subunit                                              |
| Spy49_1270  | atoA  | NE | 1275835 | 1276494 | 219 | + | 6984511 | COG2057I   | acetyl-CoA:acetoacetyl-CoA transferase B subunit                                              |
| Spy49_1271  | -     | NE | 1276527 | 1277306 | 259 | + | 6984512 | COG1028IQR | 3-hydroxybutyrate dehydrogenase                                                               |
| Spy49_1272  | -     | NE | 1277377 | 1278708 | 443 | + | 6984513 | COG2610GE  | permease                                                                                      |
| Spy49_1273  | luxS  | NE | 1278782 | 1279264 | 160 | + | 6984514 | COG1854T   | S-ribosylhomocysteinease                                                                      |
| Spy49_1274c | -     | NE | 1279411 | 1280880 | 489 | - | 6984515 | -          | hypothetical protein Spy49_1274c                                                              |
| Spy49_1275c | -     | NE | 1280894 | 1282048 | 384 | - | 6984516 | COG0116L   | hypothetical protein Spy49_1275c                                                              |
| Spy49_1276c | -     | NC | 1282493 | 1282819 | 108 | - | 6984583 | COG3599D   | hypothetical protein Spy49_1276c                                                              |
| Spy49_1277c | -     | NE | 1282947 | 1283456 | 169 | - | 6984584 | COG4474S   | hypothetical protein Spy49_1277c                                                              |
| Spy49_1278  | recU  | NC | 1283537 | 1284145 | 202 | + | 6984585 | COG3331R   | Holliday junction-specific endonuclease                                                       |
| Spy49_1279  | pbp1A | E  | 1284132 | 1286297 | 721 | + | 6984586 | COG0744M   | multimodular transpeptidase-transglycosylase                                                  |
| Spy49_1280c | pepC  | NE | 1286764 | 1288101 | 445 | - | 6984587 | COG3579E   | aminopeptidase C                                                                              |
| Spy49_1281c | nadE  | E  | 1288286 | 1289134 | 282 | - | 6984588 | COG0171H   | NAD synthetase                                                                                |
| Spy49_1282c | -     | E  | 1289112 | 1290566 | 484 | - | 6984589 | COG1488H   | nicotinate phosphoribosyltransferase                                                          |
| Spy49_1283c | aapA  | NE | 1290737 | 1292116 | 459 | - | 6984590 | COG1113E   | amino acid permease                                                                           |
| Spy49_1284c | nox2  | NE | 1292285 | 1293202 | 305 | - | 6984591 | COG0492O   | thioredoxin reductase                                                                         |
| Spy49_1285c | -     | NC | 1293266 | 1293490 | 74  | - | 6984592 | -          | hypothetical protein Spy49_1285c                                                              |
| Spy49_1286c | -     | NE | 1293594 | 1294337 | 247 | - | 6984593 | COG1126E   | amino acid ABC transporter ATP-binding protein                                                |
| Spy49_1287c | -     | NE | 1294337 | 1295140 | 267 | - | 6984594 | COG0765E   | amino acid ABC transporter                                                                    |
| Spy49_1289c | -     | E  | 1295335 | 1296678 | 447 | - | 6984595 | COG0513LKJ | ATP-dependent RNA helicase                                                                    |
| Spy49_1290c | mraY  | E  | 1296836 | 1297846 | 336 | - | 6984596 | COG0472M   | phospho-N-acetylmuramoyl-pentapeptide-transferase                                             |
| Spy49_1291c | ftsI  | E  | 1297848 | 1300103 | 751 | - | 6984597 | COG0768M   | cell division protein FtsI                                                                    |
| Spy49_1292c | ftsL  | NC | 1300107 | 1300340 | 107 | - | 6984598 | COG4839D   | cell division protein FtsL                                                                    |
| Spy49_1293c | mraW  | NE | 1300435 | 1301385 | 316 | - | 6984599 | COG0275M   | S-adenosyl-methyltransferase MraW                                                             |
| Spy49_1294c | -     | NE | 1301736 | 1301942 | 68  | - | 6984600 | -          | hypothetical protein Spy49_1294c                                                              |
| Spy49_1295c | proA  | NE | 1301917 | 1303167 | 416 | - | 6984601 | COG0014E   | gamma-glutamyl phosphate reductase                                                            |
| Spy49_1296c | proB  | NE | 1303160 | 1303981 | 273 | - | 6984602 | COG0263E   | gamma-glutamyl kinase                                                                         |
| Spy49_1297c | -     | NE | 1304045 | 1305673 | 542 | - | 6984603 | -          | hypothetical protein Spy49_1297c                                                              |
| Spy49_1298c | -     | NE | 1305678 | 1306412 | 244 | - | 6984604 | COG1131V   | ABC transporter                                                                               |
| Spy49_1299c | -     | NE | 1306446 | 1306712 | 88  | - | 6984605 | -          | hypothetical protein Spy49_1299c                                                              |
| Spy49_1300c | tkT   | C  | 1306904 | 1308889 | 661 | - | 6984606 | COG0021G   | transketolase                                                                                 |
| Spy49_1301c | tal   | NE | 1309107 | 1309751 | 214 | - | 6984607 | COG0176G   | transaldolase                                                                                 |
| Spy49_1303c | -     | NE | 1309877 | 1311376 | 499 | - | 6984608 | -          | transcriptional regulatory protein                                                            |
| Spy49_1304c | npX   | NE | 1311366 | 1312712 | 448 | - | 6984609 | COG0446R   | NADH peroxidase                                                                               |
| Spy49_1305c | glpF1 | NE | 1312821 | 1313522 | 233 | - | 6984610 | COG0580G   | glycerol uptake facilitator protein                                                           |
| Spy49_1306c | glpO  | NE | 1313524 | 1315362 | 612 | - | 6984611 | COG0578C   | aerobic glycerol-3-phosphate dehydrogenase                                                    |
| Spy49_1307c | glpK  | NE | 1315378 | 1316904 | 508 | - | 6984612 | COG0554C   | glycerol kinase                                                                               |
| Spy49_1308c | -     | NE | 1317264 | 1317656 | 130 | - | 6984613 | COG3212S   | hypothetical protein Spy49_1308c                                                              |
| Spy49_1309c | -     | NE | 1317784 | 1318041 | 85  | - | 6984614 | COG4224S   | hypothetical protein Spy49_1309c                                                              |
| Spy49_1310c | glyS  | E  | 1318195 | 1320234 | 679 | - | 6984615 | COG0751J   | glycyl-tRNA synthetase subunit beta                                                           |
| Spy49_1311c | glyQ  | E  | 1320606 | 1321523 | 305 | - | 6984616 | COG0752J   | glycyl-tRNA synthetase subunit alpha                                                          |
| Spy49_1312c | -     | NE | 1321896 | 1322402 | 168 | - | 6984617 | COG1755S   | hypothetical protein Spy49_1312c                                                              |
| Spy49_1313c | -     | NE | 1322561 | 1323400 | 279 | - | 6984618 | COG0656R   | 2,5-diketo-D-gluconic acid reductase                                                          |
| Spy49_1314c | nagA  | NE | 1323522 | 1324670 | 382 | - | 6984619 | COG1820G   | N-acetylglucosamine-6-phosphate deacetylase                                                   |
| Spy49_1316c | -     | NE | 1324787 | 1326418 | 543 | - | 6984620 | COG1283P   | Sodium-dependent phosphate transporter                                                        |
| Spy49_1318c | -     | NE | 1327469 | 1328311 | 280 | - | 6984621 | COG1307S   | hypothetical protein Spy49_1318c                                                              |
| Spy49_1319  | -     | NE | 1328604 | 1329161 | 185 | + | 6984622 | COG1309K   | TetR family transcriptional regulator                                                         |
| Spy49_1320c | -     | NE | 1329198 | 1330022 | 274 | - | 6984623 | COG0561R   | hypothetical protein Spy49_1320c                                                              |
| Spy49_1321c | -     | NE | 1330024 | 1330641 | 205 | - | 6984624 | COG2860S   | hypothetical protein Spy49_1321c                                                              |
| Spy49_1322c | lacD1 | NE | 1330838 | 1331815 | 325 | - | 6984625 | COG3684G   | tagatose 1,6-diphosphate aldolase                                                             |
| Spy49_1323c | lacC1 | NE | 1331897 | 1332160 | 87  | - | 6984626 | COG1105G   | Tagatose-6-phosphate kinase / 1-phosphofructokinase                                           |
| Spy49_1324c | -     | NC | 1331965 | 1332315 | 116 | - | 6984627 | COG1105G   | Tagatose-6-phosphate kinase / 1-phosphofructokinase                                           |
| Spy49_1325c | lacB  | NE | 1332325 | 1332840 | 171 | - | 6984628 | COG0698G   | galactose-6-phosphate isomerase subunit LacB                                                  |
| Spy49_1326c | lacA  | NE | 1332855 | 1333280 | 141 | - | 6984629 | COG0698G   | galactose-6-phosphate isomerase subunit LacA                                                  |
| Spy49_1327c | -     | NE | 1333538 | 1334989 | 483 | - | 6984630 | COG3775G   | PTS system enzyme IIC component                                                               |
| Spy49_1328c | -     | NE | 1335015 | 1335320 | 101 | - | 6984631 | COG3414G   | PTS system IIB component                                                                      |
| Spy49_1329c | -     | NE | 1335313 | 1335786 | 157 | - | 6984632 | COG1762GT  | PTS system enzyme IIA component                                                               |
| Spy49_1330  | lacR1 | NE | 1336023 | 1336793 | 256 | + | 6984633 | COG1349KG  | lactose phosphotransferase system repressor                                                   |
| Spy49_1331c | copZ  | NE | 1336997 | 1337200 | 67  | - | 6984634 | COG2608P   | copper chaperone-copper transport operon                                                      |
| Spy49_1332c | copA  | NE | 1337214 | 1339445 | 743 | - | 6984635 | COG2217P   | copper-transporting ATPase                                                                    |
| Spy49_1334c | copY  | NE | 1339445 | 1339882 | 145 | - | 6984636 | COG3682K   | Negative transcriptional regulator, CopY                                                      |
| Spy49_1335  | -     | NE | 1340045 | 1341046 | 333 | + | 6984637 | COG0657I   | esterase                                                                                      |
| Spy49_1336c | rbfA  | NC | 1341098 | 1341448 | 116 | - | 6984638 | COG0858J   | ribosome-binding factor A                                                                     |
| Spy49_1337c | infB  | E  | 1341654 | 1344515 | 953 | - | 6984639 | COG0532J   | translation initiation factor IF-2                                                            |
| Spy49_1338c | -     | NE | 1344535 | 1344837 | 100 | - | 6984640 | COG1358J   | hypothetical protein Spy49_1338c                                                              |
| Spy49_1339c | -     | NC | 1344830 | 1345126 | 98  | - | 6984641 | COG2740K   | Predicted nucleic-acid-binding protein                                                        |
| Spy49_1340c | nusA  | E  | 1345142 | 1346299 | 385 | - | 6984642 | COG0195K   | transcription elongation factor NusA                                                          |
| Spy49_1341c | -     | NE | 1346474 | 1347010 | 178 | - | 6984643 | COG0779S   | hypothetical protein Spy49_1341c                                                              |
| Spy49_1342c | trmB  | NE | 1347269 | 1347904 | 211 | - | 6984645 | COG0220R   | tRNA (guanine-N(7))-methyltransferase                                                         |
| Spy49_1343c | -     | E  | 1347904 | 1348695 | 263 | - | 6984646 | COG0510M   | hypothetical protein Spy49_1343c                                                              |
| Spy49_1344c | -     | NE | 1348759 | 1349793 | 344 | - | 6984647 | COG4473U   | ABC transporter                                                                               |
| Spy49_1345c | -     | NE | 1349796 | 1350521 | 241 | - | 6984648 | COG1131V   | ABC transporter ATP-binding protein                                                           |
| Spy49_1346  | hit   | NE | 1350593 | 1351012 | 139 | + | 6984649 | COG0537FGR | cell-cycle regulation histidine triad (HIT) protein                                           |
| Spy49_1347  | -     | NE | 1351009 | 1351365 | 118 | + | 6984650 | -          | hypothetical protein Spy49_1347                                                               |
| Spy49_1348c | -     | NE | 1351476 | 1352759 | 427 | - | 6984651 | COG1316K   | transcription regulator                                                                       |
| Spy49_1349c | -     | NE | 1352768 | 1353292 | 174 | - | 6984652 | COG0456R   | histone acetyltransferase                                                                     |
| Spy49_1350c | -     | NC | 1353267 | 1353728 | 153 | - | 6984653 | COG0802R   | hypothetical protein Spy49_1350c                                                              |
| Spy49_1351c | -     | NE | 1353882 | 1355342 | 486 | - | 6984654 | COG2252R   | hypothetical protein Spy49_1351c                                                              |
| Spy49_1352  | -     | NE | 1355607 | 1356002 | 131 | + | 6984655 | COG0561R   | hypothetical protein Spy49_1352                                                               |
| Spy49_1353  | -     | NE | 1356019 | 1356420 | 133 | + | 6984656 | COG0561R   | hypothetical protein Spy49_1353, partial                                                      |
| Spy49_1354  | manL  | NE | 1356772 | 1357764 | 303 | + | 6984657 | COG3444G   | mannose-specific phosphotransferase system component IIAb                                     |
| Spy49_1355  | manM  | NE | 1357853 | 1358662 | 269 | + | 6984658 | COG3715G   | PTS system mannose-specific transporter subunit IIC                                           |
| Spy49_1356  | manN  | NE | 1358679 | 1359590 | 303 | + | 6984659 | COG3716G   | mannose-specific phosphotransferase system component IID                                      |
| Spy49_1357  | -     | NE | 1359704 | 1360063 | 119 | + | 6984660 | COG4687S   | hypothetical protein Spy49_1357                                                               |
| Spy49_1358  | serS  | E  | 1360454 | 1361731 | 425 | + | 6984661 | COG0172J   | seryl-tRNA synthetase                                                                         |
| Spy49_1359c | accA  | NC | 1361964 | 1362734 | 256 | - | 6984662 | COG0825I   | acetyl-CoA carboxylase subunit alpha                                                          |
| Spy49_1360c | accD  | E  | 1362731 | 1363597 | 288 | - | 6984743 | COG0777I   | acetyl-CoA carboxylase subunit beta                                                           |
| Spy49_1361c | accC  | E  | 1363606 | 1364970 | 454 | - | 6984744 | COG0439I   | acetyl-CoA carboxylase biotin carboxylase subunit                                             |
| Spy49_1362c | fabZ  | NC | 1365002 | 1365424 | 140 | - | 6984745 | COG0764I   | (3R)-hydroxymristoyl-ACP dehydratase                                                          |
| Spy49_1363c | accB  | NC | 1365421 | 1365921 | 166 | - | 6984746 | COG0511I   | acetyl-CoA carboxylase biotin carboxyl carrier protein subunit                                |
| Spy49_1364c | fabF  | E  | 1365923 | 1367155 | 410 | - | 6984747 | COG0304IQ  | 3-oxoacyl-ACP synthase II                                                                     |
| Spy49_1365c | fabG  | E  | 1367170 | 1367904 | 244 | - | 6984748 | COG1028IQR | 3-ketoacyl-ACP reductase                                                                      |
| Spy49_1366c | fabD  | E  | 1367894 | 1368832 | 312 | - | 6984749 | COG0331I   | Malonyl CoA-ACP transacylase                                                                  |

|             |       |    |         |         |      |   |         |           |                                                                      |
|-------------|-------|----|---------|---------|------|---|---------|-----------|----------------------------------------------------------------------|
| Spy49_1367c | fabK  | E  | 1368857 | 1369828 | 323  | - | 6984750 | COG2070R  | Enoyl-ACP reductase (FMN)                                            |
| Spy49_1368c | acpP  | NC | 1370029 | 1370253 | 74   | - | 6984751 | COG0236IQ | acyl carrier protein                                                 |
| Spy49_1369c | fabH  | E  | 1370314 | 1371288 | 324  | - | 6984752 | COG0332I  | 3-oxoacyl-ACP synthase III                                           |
| Spy49_1370c | -     | NE | 1371289 | 1371723 | 144  | - | 6984753 | COG1846K  | transcriptional regulator                                            |
| Spy49_1371c | phaB  | E  | 1371797 | 1372588 | 263  | - | 6984754 | COG1024I  | enoyl-CoA hydratase                                                  |
| Spy49_1372c | dnaJ  | E  | 1372809 | 1373945 | 378  | - | 6984755 | COG0484O  | molecular chaperone DnaJ                                             |
| Spy49_1373  | -     | NC | 1374008 | 1374217 | 69   | + | 6984756 | -         | hypothetical protein Spy49_1373                                      |
| Spy49_1374c | dnaK  | E  | 1374226 | 1376052 | 608  | - | 6984757 | COG0443O  | molecular chaperone DnaK                                             |
| Spy49_1375c | grpE  | E  | 1376233 | 1376805 | 190  | - | 6984758 | COG0576O  | heat shock protein GrpE                                              |
| Spy49_1376c | hrcA  | NE | 1376808 | 1377851 | 347  | - | 6984759 | COG1420K  | heat-inducible transcription repressor                               |
| Spy49_1377c | -     | NE | 1377978 | 1378547 | 189  | - | 6984760 | COG1705NU | N-acetyl-muramidase                                                  |
| Spy49_1378c | -     | NE | 1378544 | 1379287 | 247  | - | 6984761 | COG1876M  | D-alanyl-D-alanine carboxypeptidase                                  |
| Spy49_1379c | -     | NE | 1379277 | 1379984 | 235  | - | 6984762 | COG0406G  | phosphoglycerate mutase family                                       |
| Spy49_1380c | -     | NE | 1380376 | 1380615 | 79   | - | 6984763 | COG2261S  | hypothetical protein Spy49_1380c                                     |
| Spy49_1381c | -     | NE | 1380834 | 1381049 | 71   | - | 6984764 | -         | hypothetical protein Spy49_1381c                                     |
| Spy49_1382c | gatB  | E  | 1381046 | 1382485 | 479  | - | 6984765 | COG0064J  | aspartyl/glutamyl-tRNA amidotransferase subunit B                    |
| Spy49_1383c | gatA  | E  | 1382485 | 1383951 | 488  | - | 6984766 | COG0154J  | aspartyl/glutamyl-tRNA amidotransferase subunit A                    |
| Spy49_1384c | gatC  | NC | 1383951 | 1384253 | 100  | - | 6984767 | COG0721J  | aspartyl/glutamyl-tRNA amidotransferase subunit C                    |
| Spy49_1385c | -     | NE | 1384485 | 1384733 | 82   | - | 6984768 | COG0574G  | pyruvate,phosphate dikinase                                          |
| Spy49_1386c | -     | NE | 1385248 | 1385802 | 184  | - | 6984769 | COG1335Q  | Nicotinamidase                                                       |
| Spy49_1387c | codY  | E  | 1385949 | 1386731 | 260  | - | 6984770 | COG4465K  | transcriptional repressor CodY                                       |
| Spy49_1388c | -     | NE | 1386949 | 1388130 | 393  | - | 6984771 | COG0436E  | aminotransferase AlaT                                                |
| Spy49_1389  | -     | NE | 1388395 | 1388847 | 150  | + | 6984772 | COG0589T  | hypothetical protein Spy49_1389                                      |
| Spy49_1390c | -     | NE | 1388970 | 1390358 | 462  | - | 6984773 | COG4696S  | hypothetical protein Spy49_1390c                                     |
| Spy49_1391  | asnB  | NE | 1390430 | 1391395 | 321  | + | 6984774 | COG0252EJ | L-asparaginase                                                       |
| Spy49_1392c | -     | NE | 1391744 | 1392448 | 234  | - | 6984775 | -         | hypothetical protein Spy49_1392c                                     |
| Spy49_1393c | -     | NE | 1392461 | 1393363 | 300  | - | 6984776 | COG1131V  | ABC transporter                                                      |
| Spy49_1394c | recG  | C  | 1393655 | 1395670 | 671  | - | 6984777 | COG1200LK | ATP-dependent DNA helicase RecG                                      |
| Spy49_1395c | -     | NE | 1396045 | 1397499 | 484  | - | 6984778 | COG1122P  | cobalt ABC transporter ATPase                                        |
| Spy49_1396c | -     | NE | 1397436 | 1398116 | 226  | - | 6984779 | COG0619P  | cobalt ABC transporter permease                                      |
| Spy49_1397c | -     | NE | 1398113 | 1398706 | 197  | - | 6984780 | -         | ABC transporter permease                                             |
| Spy49_1398c | cycC  | NE | 1398703 | 1400373 | 556  | - | 6984781 | COG1132V  | ABC transporter                                                      |
| Spy49_1400c | cycD  | NE | 1400366 | 1402129 | 587  | - | 6984782 | COG4988CO | ABC transporter                                                      |
| Spy49_1401c | fluC2 | NE | 1402126 | 1402962 | 278  | - | 6984783 | COG1120PH | ferrichrome transport ATP-binding protein fluC                       |
| Spy49_1402c | fluB2 | NE | 1402959 | 1403981 | 340  | - | 6984784 | COG0609P  | ferrichrome ABC transporter permease                                 |
| Spy49_1403c | fluD2 | NE | 1403983 | 1405728 | 581  | - | 6984785 | COG0614P  | ferrichrome ABC transporter substrate-binding protein                |
| Spy49_1405c | -     | NE | 1405925 | 1409752 | 1275 | - | 6984786 | COG4886S  | Fe3+-siderophore transport protein                                   |
| Spy49_1407c | isp2  | NE | 1410242 | 1411753 | 503  | - | 6984787 | COG3942R  | Immunogenic secreted protein                                         |
| Spy49_1408c | alr   | E  | 1411840 | 1412940 | 366  | - | 6984788 | COG0787M  | alanine racemase                                                     |
| Spy49_1409c | acpS  | E  | 1412937 | 1413293 | 118  | - | 6984789 | COG0736I  | 4'-phosphopantetheinyl transferase                                   |
| Spy49_1410c | secA  | E  | 1413409 | 1415928 | 839  | - | 6984790 | COG0653U  | preprotein translocase subunit SecA                                  |
| Spy49_1412c | pmi   | NE | 1417389 | 1418342 | 317  | - | 6984791 | COG1482G  | mannose-6-phosphate isomerase                                        |
| Spy49_1413c | scrK  | NE | 1418389 | 1419393 | 334  | - | 6984792 | COG1940KG | Fructokinase                                                         |
| Spy49_1414c | endoS | NE | 1419562 | 1422093 | 843  | - | 6984793 | COG3469G  | endo-beta-N-acetylglucosaminidase                                    |
| Spy49_1415c | scrA  | NE | 1422324 | 1424207 | 627  | - | 6984794 | COG1263G  | sucrose-specific PTS permease, enzyme II                             |
| Spy49_1416  | scrB  | NC | 1424449 | 1425888 | 479  | + | 6984795 | COG1621G  | Sucrose-6-phosphate hydrolase                                        |
| Spy49_1417  | scrR  | NE | 1425893 | 1426858 | 321  | + | 6984796 | COG1609K  | sucrose operon repressor                                             |
| Spy49_1418c | nusB  | NE | 1426999 | 1427451 | 150  | - | 6984797 | COG0781K  | transcription antitermination protein NusB                           |
| Spy49_1419c | -     | NE | 1427444 | 1427833 | 129  | - | 6984798 | COG1302S  | hypothetical protein Spy49_1419c                                     |
| Spy49_1420c | efp   | NE | 1427879 | 1428436 | 185  | - | 6984799 | COG0231J  | elongation factor P                                                  |
| Spy49_1421c | comEB | NE | 1428532 | 1428993 | 153  | - | 6984800 | COG2131F  | late competence protein required for DNA binding                     |
| Spy49_1422c | pepP  | NE | 1429028 | 1430101 | 357  | - | 6984801 | COG0006E  | aminopeptidase YpdF                                                  |
| Spy49_1423c | uvrA  | NE | 1430216 | 1430374 | 952  | - | 6984802 | COG0178L  | excinuclease ABC subunit A                                           |
| Spy49_1424  | -     | C  | 1433247 | 1434191 | 314  | + | 6984803 | COG0598P  | divalent cation transport protein, magnesium transporter CorA family |
| Spy49_1425  | -     | NE | 1434323 | 1434979 | 218  | + | 6984804 | COG4858S  | hypothetical protein Spy49_1425                                      |
| Spy49_1426c | rpsR  | NC | 1435112 | 1435351 | 79   | - | 6984805 | COG0238J  | 30S ribosomal protein S18                                            |
| Spy49_1427c | ssb2  | C  | 1435516 | 1436007 | 163  | - | 6984806 | COG0629L  | single-stranded DNA-binding protein                                  |
| Spy49_1428c | rpsF  | NC | 1436029 | 1436319 | 96   | - | 6984807 | COG0360J  | 30S ribosomal protein S6                                             |
| Spy49_1429c | -     | NE | 1436492 | 1436785 | 97   | - | 6984808 | -         | hypothetical protein Spy49_1429c                                     |
| Spy49_1430  | mutY  | NE | 1436953 | 1438107 | 384  | + | 6984809 | COG1194L  | A/G-specific adenine glycosylase                                     |
| Spy49_1431  | -     | NE | 1438284 | 1438871 | 195  | + | 6984810 | COG1476K  | Cro/Ci family transcriptional regulator                              |
| Spy49_1432c | trx2  | NE | 1438923 | 1439237 | 104  | - | 6984811 | COG3118O  | thioredoxin reductase                                                |
| Spy49_1433c | -     | NE | 1439318 | 1439713 | 131  | - | 6984812 | -         | PAP2 family protein, partial                                         |
| Spy49_1434c | mutS2 | NE | 1439822 | 1442161 | 779  | - | 6984813 | COG1193L  | DNA mismatch repair protein                                          |
| Spy49_1435c | -     | NE | 1442310 | 1442855 | 181  | - | 6984814 | COG1286R  | hypothetical protein Spy49_1435c                                     |
| Spy49_1436c | -     | NE | 1442858 | 1443166 | 102  | - | 6984815 | -         | hypothetical protein Spy49_1436c                                     |
| Spy49_1437  | -     | E  | 1443323 | 1444225 | 300  | + | 6984816 | COG1039L  | ribonuclease HIII                                                    |
| Spy49_1438  | spi   | E  | 1444236 | 1444829 | 197  | + | 6984817 | COG0681U  | signal peptidase I                                                   |
| Spy49_1439  | recD  | NE | 1444887 | 1447340 | 817  | + | 6984818 | COG0507L  | Exodeoxyribonuclease V subunit alpha                                 |
| Spy49_1440  | -     | NE | 1447431 | 1447913 | 160  | + | 6984819 | -         | hypothetical protein Spy49_1440                                      |
| Spy49_1441c | dinP  | NC | 1448006 | 1449100 | 364  | - | 6984820 | COG0389L  | DNA polymerase IV                                                    |
| Spy49_1442  | pfl   | NC | 1449309 | 1451636 | 775  | + | 6984821 | COG1882C  | pyruvate formate-lyase                                               |
| Spy49_1443c | -     | NE | 1451724 | 1452113 | 129  | - | 6984822 | COG1680V  | esterase                                                             |
| Spy49_1444c | cppA  | NE | 1452098 | 1452850 | 250  | - | 6984903 | -         | C3-degrading proteinase                                              |
| Spy49_1445  | -     | NE | 1453112 | 1454044 | 310  | + | 6984904 | -         | hypothetical protein Spy49_1445                                      |
| Spy49_1447c | glpF2 | NC | 1454380 | 1455327 | 315  | - | 6984905 | COG0580G  | glycerol uptake facilitator protein                                  |
| Spy49_1449c | norA  | NE | 1455730 | 1456926 | 398  | - | 6984906 | COG2814G  | antibiotic resistance protein NorA                                   |
| Spy49_1450  | -     | NE | 1457032 | 1457751 | 239  | + | 6984907 | COG0664T  | Crp/Fnr family transcriptional regulator                             |
| Spy49_1451  | pepXP | NE | 1457773 | 1460055 | 760  | + | 6984908 | COG2936R  | x-prolyl-dipeptidyl aminopeptidase                                   |
| Spy49_1452c | -     | NE | 1460135 | 1460356 | 73   | - | 6984909 | -         | hypothetical protein Spy49_1452c                                     |
| Spy49_1453  | -     | NE | 1460526 | 1460900 | 124  | + | 6984910 | COG1476K  | repressor-phage associated                                           |
| Spy49_1454c | -     | NE | 1461245 | 1461424 | 59   | - | 6984911 | -         | Paratox                                                              |
| Spy49_1455  | spd3  | NE | 1461662 | 1462462 | 266  | + | 6984912 | -         | streptodornase                                                       |
| Spy49_1456  | -     | NE | 1462842 | 1463168 | 108  | + | 6984913 | -         | hypothetical protein Spy49_1456                                      |
| Spy49_1457c | -     | NE | 1463218 | 1464084 | 288  | - | 6984914 | -         | putative phage associated protein                                    |
| Spy49_1458c | -     | NE | 1464072 | 1464596 | 174  | - | 6984915 | COG3600S  | phage-associated protein                                             |
| Spy49_1459c | -     | NE | 1464736 | 1465944 | 402  | - | 6984916 | COG1705NU | phage-associated cell wall hydrolase                                 |
| Spy49_1460c | -     | NE | 1466060 | 1466287 | 75   | - | 6984917 | COG5546S  | Holin                                                                |
| Spy49_1461c | -     | NE | 1466284 | 1466559 | 91   | - | 6984918 | -         | hypothetical protein Spy49_1461c                                     |
| Spy49_1462c | -     | NE | 1466569 | 1467186 | 205  | - | 6984919 | -         | hypothetical protein Spy49_1462c                                     |
| Spy49_1463c | -     | NC | 1467189 | 1467350 | 53   | - | 6984920 | -         | hypothetical protein Spy49_1463c                                     |
| Spy49_1464c | -     | NE | 1467364 | 1469274 | 636  | - | 6984921 | -         | hypothetical protein Spy49_1464c                                     |
| Spy49_1465c | -     | NC | 1469290 | 1470294 | 334  | - | 6984922 | -         | Hyaluronidase-phage associated                                       |
| Spy49_1466c | -     | NC | 1470291 | 1472342 | 683  | - | 6984923 | -         | hypothetical protein Spy49_1466c                                     |
| Spy49_1467c | -     | NC | 1472339 | 1473118 | 259  | - | 6984924 | COG4722S  | phage associated hypothetical protein                                |
| Spy49_1468c | -     | NE | 1473151 | 1476786 | 1211 | - | 6984925 | COG5412S  | minor tail protein                                                   |
| Spy49_1470c | -     | NE | 1476801 | 1477130 | 109  | - | 6984926 | -         | hypothetical protein Spy49_1470c                                     |
| Spy49_1471c | -     | NE | 1477172 | 1477531 | 119  | - | 6984927 | -         | hypothetical protein Spy49_1471c                                     |
| Spy49_1472c | -     | NE | 1477584 | 1478237 | 127  | - | 6984928 | -         | Major tail protein                                                   |
| Spy49_1474c | -     | NE | 1478247 | 1478636 | 129  | - | 6984929 | -         | hypothetical protein Spy49_1474c                                     |
| Spy49_1475c | -     | NE | 1478633 | 1478989 | 118  | - | 6984930 | -         | hypothetical protein Spy49_1475c                                     |
| Spy49_1476c | -     | NE | 1478979 | 1479287 | 102  | - | 6984931 | -         | hypothetical protein-phage 370.2                                     |
| Spy49_1477c | -     | NE | 1479284 | 1479637 | 117  | - | 6984932 | -         | hypothetical protein Spy49_1477c                                     |
| Spy49_1478c | -     | NE | 1479651 | 1479893 | 80   | - | 6984933 | -         | hypothetical protein Spy49_1478c                                     |
| Spy49_1479c | -     | NE | 1479903 | 1480985 | 360  | - | 6984934 | -         | phage protein                                                        |
| Spy49_1480c | -     | NE | 1480988 | 1481368 | 126  | - | 6984935 | -         | structural protein-phage associated                                  |
| Spy49_1481c | -     | NE | 1481378 | 1481911 | 177  | - | 6984936 | -         | hypothetical protein Spy49_1481c                                     |

|             |       |    |         |         |     |   |         |           |                                                         |
|-------------|-------|----|---------|---------|-----|---|---------|-----------|---------------------------------------------------------|
| Spy49_1482c | -     | NE | 1482055 | 1482321 | 88  | - | 6984937 | -         | putative phage associated protein                       |
| Spy49_1483c | -     | NE | 1482324 | 1482638 | 104 | - | 6984938 | -         | hypothetical protein Spy49_1483c                        |
| Spy49_1484c | -     | NE | 1482708 | 1482893 | 61  | - | 6984939 | -         | hypothetical protein Spy49_1484c                        |
| Spy49_1485c | -     | NE | 1482897 | 1484459 | 520 | - | 6984940 | COG5585T  | hypothetical protein Spy49_1485c                        |
| Spy49_1486c | -     | NE | 1484440 | 1485942 | 500 | - | 6984941 | -         | hypothetical protein Spy49_1486c                        |
| Spy49_1487c | -     | NE | 1485954 | 1487243 | 429 | - | 6984942 | COG1783R  | Large terminase                                         |
| Spy49_1488c | -     | NE | 1487221 | 1487703 | 160 | - | 6984943 | COG3728L  | Small terminase                                         |
| Spy49_1489c | -     | NE | 1488535 | 1488975 | 146 | - | 6984944 | -         | hypothetical protein Spy49_1489c                        |
| Spy49_1491c | -     | NE | 1489415 | 1489936 | 173 | - | 6984945 | -         | phage protein                                           |
| Spy49_1492c | -     | NE | 1489933 | 1490226 | 97  | - | 6984946 | -         | hypothetical protein Spy49_1492c                        |
| Spy49_1493c | -     | NE | 1490223 | 1490408 | 61  | - | 6984947 | -         | putative phage associated protein                       |
| Spy49_1494c | -     | NC | 1490506 | 1490991 | 161 | - | 6984948 | COG2226H  | DNA N-4 cytosine methyltransferase M.NgoMxV             |
| Spy49_1496c | -     | NE | 1491276 | 1491680 | 134 | - | 6984949 | -         | phage protein                                           |
| Spy49_1497c | -     | NC | 1491664 | 1491954 | 96  | - | 6984950 | -         | hypothetical protein Spy49_1497c                        |
| Spy49_1498c | -     | NE | 1492193 | 1492549 | 118 | - | 6984951 | -         | putative phage associated protein                       |
| Spy49_1499c | -     | NE | 1492625 | 1492987 | 120 | - | 6984952 | COG4570L  | hypothetical protein Spy49_1499c                        |
| Spy49_1500c | -     | NC | 1493196 | 1493621 | 141 | - | 6984953 | COG0629L  | Single-strand binding protein 3                         |
| Spy49_1501c | -     | NE | 1493614 | 1494288 | 224 | - | 6984954 | -         | Recombination protein                                   |
| Spy49_1502c | -     | NC | 1494289 | 1494435 | 48  | - | 6984955 | -         | hypothetical protein Spy49_1502c                        |
| Spy49_1504c | -     | NE | 1494793 | 1495047 | 84  | - | 6984956 | -         | hypothetical protein Spy49_1504c                        |
| Spy49_1505c | -     | NC | 1495034 | 1495381 | 115 | - | 6984957 | -         | hypothetical protein Spy49_1505c                        |
| Spy49_1506c | -     | NE | 1495522 | 1497093 | 523 | - | 6984958 | COG1484L  | DNA replication protein DnaC                            |
| Spy49_1507c | -     | NE | 1497209 | 1497652 | 147 | - | 6984959 | -         | hypothetical protein Spy49_1507c                        |
| Spy49_1509c | -     | NE | 1498078 | 1498350 | 90  | - | 6984960 | -         | hypothetical protein Spy49_1509c                        |
| Spy49_1510c | -     | NC | 1498523 | 1498702 | 59  | - | 6984961 | -         | hypothetical protein Spy49_1510c                        |
| Spy49_1511c | -     | NC | 1498833 | 1498967 | 44  | - | 6984962 | -         | putative phage associated protein                       |
| Spy49_1512c | -     | NE | 1499249 | 1499608 | 119 | - | 6984963 | -         | hypothetical protein Spy49_1512c                        |
| Spy49_1513c | -     | NE | 1499682 | 1499939 | 85  | - | 6984964 | -         | hypothetical protein Spy49_1513c                        |
| Spy49_1514c | -     | NE | 1500142 | 1500483 | 113 | - | 6984965 | -         | hypothetical protein Spy49_1514c                        |
| Spy49_1516c | -     | NC | 1500755 | 1500904 | 49  | - | 6984966 | -         | putative phage associated protein                       |
| Spy49_1517c | -     | NE | 1500936 | 1501664 | 242 | - | 6984967 | COG3645S  | P1-type antirepressor-phage associated cro protein      |
| Spy49_1518c | -     | NE | 1501697 | 1501885 | 62  | - | 6984968 | -         | hypothetical protein Spy49_1518c                        |
| Spy49_1520c | -     | NC | 1502073 | 1502255 | 60  | - | 6984969 | -         | hypothetical protein Spy49_1520c                        |
| Spy49_1521c | -     | NE | 1502532 | 1503293 | 253 | - | 6984970 | COG3617K  | Antirepressor                                           |
| Spy49_1522  | -     | C  | 1503460 | 1503732 | 90  | + | 6984971 | -         | hypothetical protein Spy49_1522                         |
| Spy49_1525  | -     | NE | 1504006 | 1504473 | 155 | + | 6984972 | -         | hypothetical protein Spy49_1525                         |
| Spy49_1526  | -     | NE | 1504589 | 1505368 | 259 | + | 6984973 | -         | hypothetical protein Spy49_1526                         |
| Spy49_1528c | -     | NC | 1505502 | 1505660 | 52  | - | 6984974 | -         | hypothetical protein Spy49_1528c                        |
| Spy49_1529  | -     | NC | 1506024 | 1506782 | 252 | + | 6984975 | COG2932K  | Repressor protein                                       |
| Spy49_1530  | -     | NE | 1506855 | 1507277 | 140 | + | 6984976 | -         | Lj965 prophage superinfection immunity protein          |
| Spy49_1531  | -     | NE | 1507398 | 1508534 | 378 | + | 6984977 | COG4974L  | Prophage NZ131.3 integrase                              |
| Spy49_1532  | -     | NE | 1508573 | 1508893 | 106 | + | 6984978 | COG0718S  | hypothetical protein Spy49_1532                         |
| Spy49_1533c | -     | NE | 1508950 | 1509687 | 245 | - | 6984979 | COG0789K  | MerK family transcriptional regulator                   |
| Spy49_1534c | dnaQ  | NC | 1509840 | 1510427 | 195 | - | 6984980 | COG0847L  | DNA polymerase III subunit epsilon                      |
| Spy49_1535c | -     | NC | 1510476 | 1511057 | 193 | - | 6984981 | -         | hypothetical protein Spy49_1535c                        |
| Spy49_1536c | -     | NE | 1511183 | 1511698 | 171 | - | 6984982 | -         | transposase-IS1548                                      |
| Spy49_1537c | -     | NE | 1511601 | 1512305 | 234 | - | 6985063 | COG5433L  | transposase-IS1548                                      |
| Spy49_1538  | -     | NE | 1512526 | 1513695 | 389 | + | 6985064 | COG2081R  | hypothetical protein Spy49_1538                         |
| Spy49_1540c | deoC  | NE | 1513790 | 1514461 | 223 | - | 6985065 | COG0274F  | deoxyribose-phosphate aldolase                          |
| Spy49_1541c | nupC  | NE | 1514491 | 1515693 | 400 | - | 6985066 | COG1972F  | nucleoside permease nupC                                |
| Spy49_1542c | udp   | NE | 1515714 | 1516493 | 259 | - | 6985067 | COG2820F  | Uridine phosphorylase                                   |
| Spy49_1543  | -     | NE | 1516733 | 1517491 | 252 | + | 6985068 | COG2188K  | GntR family transcriptional regulator                   |
| Spy49_1544  | rpsN  | NE | 1517700 | 1517969 | 89  | + | 6985069 | COG0199J  | 30S ribosomal protein S14                               |
| Spy49_1545c | gcp   | NC | 1518141 | 1519169 | 342 | - | 6985070 | COG0533O  | DNA-binding/iron metalloprotein/AP endonuclease         |
| Spy49_1546c | -     | NE | 1519159 | 1519614 | 151 | - | 6985071 | COG0456R  | ribosomal-protein-S18p-alanine acetyltransferase        |
| Spy49_1547c | -     | E  | 1519586 | 1520284 | 232 | - | 6985072 | COG1214O  | molecular chaperone                                     |
| Spy49_1548  | -     | NC | 1520568 | 1520798 | 76  | + | 6985073 | COG5503S  | hypothetical protein Spy49_1548                         |
| Spy49_1549  | -     | E  | 1520800 | 1522482 | 560 | + | 6985074 | COG0595R  | hypothetical protein Spy49_1549                         |
| Spy49_1550c | glnA  | NE | 1522710 | 1524056 | 448 | - | 6985075 | COG0174E  | glutamine synthetase                                    |
| Spy49_1551c | glnR  | NE | 1524094 | 1524465 | 123 | - | 6985076 | COG0789K  | transcriptional regulator                               |
| Spy49_1552c | -     | NE | 1524532 | 1525083 | 183 | - | 6985077 | COG4129S  | hypothetical protein Spy49_1552c                        |
| Spy49_1553c | pgk   | NC | 1525345 | 1526541 | 398 | - | 6985078 | COG0126G  | phosphoglycerate kinase                                 |
| Spy49_1554c | lppC  | NE | 1526726 | 1527580 | 284 | - | 6985079 | COG2503R  | acid phosphatase                                        |
| Spy49_1555c | -     | NE | 1527820 | 1528701 | 293 | - | 6985080 | COG0330O  | hypersensitive- induced response protein-like protein   |
| Spy49_1556c | -     | E  | 1528938 | 1530602 | 554 | - | 6985081 | COG1461R  | DAK2 domain-containing protein                          |
| Spy49_1557c | asp   | NC | 1530602 | 1530967 | 121 | - | 6985082 | COG1302S  | alkaline-shock protein                                  |
| Spy49_1558c | rpmB  | NE | 1531119 | 1531307 | 62  | - | 6985083 | COG0227J  | 50S ribosomal protein L28                               |
| Spy49_1559c | fbp   | E  | 1531689 | 1532570 | 293 | - | 6985084 | COG0191G  | fructose-bisphosphate aldolase                          |
| Spy49_1560c | -     | NE | 1532916 | 1533842 | 308 | - | 6985086 | COG1073R  | hypothetical protein Spy49_1560c                        |
| Spy49_1561c | pyrG  | NE | 1534010 | 1535614 | 534 | - | 6985087 | COG0504F  | CTP synthetase                                          |
| Spy49_1562c | rpoE  | NE | 1535871 | 1536479 | 202 | - | 6985088 | COG3343K  | DNA-directed RNA polymerase subunit delta               |
| Spy49_1563c | tig   | NE | 1536663 | 1537946 | 427 | - | 6985089 | COG0544O  | trigger factor                                          |
| Spy49_1564  | -     | NE | 1538267 | 1539112 | 281 | + | 6985090 | COG0668M  | mechanosensitive ion channel                            |
| Spy49_1565c | -     | NE | 1539177 | 1539737 | 186 | - | 6985091 | COG4475S  | hypothetical protein Spy49_1565c                        |
| Spy49_1566c | -     | NE | 1539751 | 1540221 | 156 | - | 6985092 | COG4720S  | hypothetical protein Spy49_1566c                        |
| Spy49_1567c | thiD  | NE | 1540211 | 1540975 | 254 | - | 6985093 | COG0351H  | phosphomethylpyrimidine kinase                          |
| Spy49_1568c | truA  | NE | 1540965 | 1541714 | 249 | - | 6985094 | COG0101J  | tRNA pseudouridine synthase A                           |
| Spy49_1569c | comX2 | NE | 1542131 | 1542388 | 85  | - | 6985095 | -         | ComX2 alternate sigma factor                            |
| Spy49_1571c | -     | NE | 1548174 | 1549316 | 380 | - | 6985102 | COG1929G  | glycerate kinase                                        |
| Spy49_1572  | hsdR  | NE | 1549597 | 1552575 | 992 | + | 6985103 | COG0610V  | type I site-specific deoxyribonuclease                  |
| Spy49_1573  | hsdS  | NE | 1552588 | 1553730 | 380 | + | 6985104 | COG0732V  | specificity determinant HsdS                            |
| Spy49_1574  | hsdM  | NE | 1553743 | 1555323 | 526 | + | 6985105 | COG0286V  | type I site-specific deoxyribonuclease                  |
| Spy49_1575c | -     | NE | 1555533 | 1555733 | 66  | - | 6985106 | -         | hypothetical protein Spy49_1575c                        |
| Spy49_1576c | salR  | NE | 1555876 | 1556481 | 201 | - | 6985107 | COG2197TK | response regulator of salavarin regulon                 |
| Spy49_1577c | salK  | NE | 1556462 | 1557883 | 473 | - | 6985108 | COG4585T  | SalK                                                    |
| Spy49_1578c | salY  | NE | 1558064 | 1559971 | 635 | - | 6985109 | -         | ABC transporter                                         |
| Spy49_1579c | salX  | NE | 1559973 | 1560710 | 245 | - | 6985110 | COG1136V  | salivarin A ABC transporter                             |
| Spy49_1580c | salT  | NE | 1560707 | 1561168 | 153 | - | 6985111 | COG2274V  | salivarin A modification enzyme                         |
| Spy49_1582c | salB  | NE | 1561242 | 1562867 | 541 | - | 6985112 | COG4403V  | salivarin A modification enzyme, amino acid dehydration |
| Spy49_1583c | salA  | NC | 1562951 | 1563097 | 48  | - | 6985113 | -         | Lantibiotic salivarin A                                 |
| Spy49_1584c | lacG  | NE | 1563609 | 1565042 | 477 | - | 6985114 | COG2723G  | 6-phospho-beta-galactosidase                            |
| Spy49_1585c | lacE  | NE | 1565103 | 1566800 | 565 | - | 6985115 | COG1455G  | PTS system lactose-specific transporter subunit IIBc    |
| Spy49_1586c | lacF  | NE | 1566800 | 1567117 | 105 | - | 6985116 | COG1447G  | PTS system lactose-specific transporter subunit IIA     |
| Spy49_1587c | lacD2 | NE | 1567141 | 1568124 | 327 | - | 6985117 | COG3684G  | tagatose 1,6-diphosphate aldolase                       |
| Spy49_1588c | lacC2 | NE | 1568128 | 1569057 | 309 | - | 6985118 | COG1105G  | tagatose-6-phosphate kinase                             |
| Spy49_1589c | lacB2 | NE | 1569103 | 1569618 | 171 | - | 6985119 | COG0698G  | galactose-6-phosphate isomerase subunit LacB            |
| Spy49_1590c | lacA2 | NE | 1569653 | 1570081 | 142 | - | 6985120 | COG0698G  | galactose-6-phosphate isomerase subunit LacA            |
| Spy49_1591  | lacR2 | NE | 1570527 | 1571300 | 257 | + | 6985121 | COG1349KG | lactose phosphotransferase system repressor             |
| Spy49_1592  | -     | NE | 1572028 | 1572249 | 73  | + | 6985122 | -         | DNA-damage-inducible protein J                          |
| Spy49_1593  | -     | NE | 1572239 | 1572574 | 111 | + | 6985123 | -         | hypothetical protein Spy49_1593                         |
| Spy49_1594  | -     | NE | 1573340 | 1573660 | 106 | + | 6985124 | COG4974L  | degenerate integrase                                    |
| Spy49_1595c | rpsI  | E  | 1573828 | 1574220 | 130 | - | 6985125 | COG0103J  | 30S ribosomal protein S9                                |
| Spy49_1596c | rplM  | NC | 1574241 | 1574687 | 148 | - | 6985126 | COG0102J  | 50S ribosomal protein L13                               |
| Spy49_1597c | -     | NC | 1574905 | 1575111 | 68  | - | 6985127 | COG1476K  | transcription regulator                                 |
| Spy49_1598c | -     | NE | 1575108 | 1575806 | 232 | - | 6985128 | -         | hypothetical protein Spy49_1598c                        |
| Spy49_1599c | -     | NC | 1575942 | 1576817 | 291 | - | 6985129 | COG1307S  | hypothetical protein Spy49_1599c                        |
| Spy49_1600c | -     | NE | 1576898 | 1577380 | 160 | - | 6985130 | COG3688R  | hypothetical protein Spy49_1600c                        |



|             |        |    |         |         |      |   |         |           |                                                                                           |
|-------------|--------|----|---------|---------|------|---|---------|-----------|-------------------------------------------------------------------------------------------|
| Spy49_1601c | -      | NE | 1577419 | 1578165 | 248  | - | 6985131 | COG0566J  | 23S rRNA methyltransferase                                                                |
| Spy49_1602c | -      | NE | 1578212 | 1579009 | 265  | - | 6985132 | -         | hypothetical protein Spy49_1602c                                                          |
| Spy49_1603c | -      | NE | 1579205 | 1579618 | 137  | - | 6985133 | COG1939S  | hypothetical protein Spy49_1603c                                                          |
| Spy49_1604c | cysS   | E  | 1579611 | 1580954 | 447  | - | 6985134 | COG0215J  | cysteinyI-tRNA synthetase                                                                 |
| Spy49_1605c | -      | NE | 1580982 | 1581212 | 76   | - | 6985135 | -         | hypothetical protein Spy49_1605c                                                          |
| Spy49_1606c | cysE   | NC | 1581691 | 1582272 | 193  | - | 6985136 | COG1045E  | Serine acetyltransferase cysE                                                             |
| Spy49_1607c | -      | NE | 1582281 | 1583033 | 250  | - | 6985137 | -         | hypothetical protein Spy49_1607c                                                          |
| Spy49_1608c | pnp    | NE | 1583026 | 1585158 | 710  | - | 6985138 | COG1185J  | polynucleotide phosphorylase/polyadenylase                                                |
| Spy49_1609c | -      | NE | 1585438 | 1586166 | 242  | - | 6985139 | COG0176G  | transaldolase                                                                             |
| Spy49_1610c | ulaA   | NE | 1586179 | 1587558 | 459  | - | 6985140 | COG3037S  | PTS system ascorbate-specific transporter subunit IIC                                     |
| Spy49_1611c | -      | NE | 1587585 | 1587869 | 94   | - | 6985141 | COG3414G  | PTS system IIB component                                                                  |
| Spy49_1612c | -      | NE | 1587862 | 1589922 | 686  | - | 6985142 | COG3711K  | transcriptional regulator                                                                 |
| Spy49_1613c | rpsO   | NE | 1590275 | 1590544 | 89   | - | 6985223 | COG0184J  | 30S ribosomal protein S15                                                                 |
| Spy49_1614c | -      | NE | 1590720 | 1590920 | 66   | - | 6985224 | -         | hypothetical protein Spy49_1614c                                                          |
| Spy49_1615  | def    | C  | 1591319 | 1591933 | 204  | + | 6985225 | COG0242J  | peptide deformylase                                                                       |
| Spy49_1616c | -      | NE | 1591967 | 1592509 | 180  | - | 6985226 | COG0431R  | hypothetical protein Spy49_1616c                                                          |
| Spy49_1617c | -      | NE | 1592640 | 1593068 | 142  | - | 6985227 | COG1846K  | MarK family transcriptional regulator                                                     |
| Spy49_1618c | polC   | E  | 1593178 | 1597575 | 1465 | - | 6985228 | COG2176L  | DNA polymerase III PolC                                                                   |
| Spy49_1619c | proS   | E  | 1597830 | 1599866 | 618  | - | 6985229 | COG0442J  | prolyl-tRNA synthetase                                                                    |
| Spy49_1620c | eep    | NE | 1599884 | 1601143 | 419  | - | 6985230 | COG0750M  | hypothetical protein Spy49_1620c                                                          |
| Spy49_1621c | cdsA   | E  | 1601216 | 1602010 | 264  | - | 6985231 | COG0575I  | phosphatidate cytidyltransferase                                                          |
| Spy49_1622c | upp5   | E  | 1602023 | 1602772 | 249  | - | 6985232 | COG0020I  | undecaprenyl pyrophosphate synthase                                                       |
| Spy49_1624c | yajC   | NE | 1602991 | 1603356 | 121  | - | 6985233 | COG1862U  | preprotein translocase subunit YajC                                                       |
| Spy49_1625c | -      | NE | 1603472 | 1603819 | 115  | - | 6985234 | COG0526OC | bacteriocin transport accessory protein, Bta                                              |
| Spy49_1626c | pulA   | NE | 1603961 | 1607365 | 1134 | - | 6985235 | COG1523G  | pullulanase                                                                               |
| Spy49_1627c | dexB   | NE | 1607656 | 1609269 | 537  | - | 6985236 | COG0366G  | glucan 1,6-alpha-glucosidase                                                              |
| Spy49_1628c | msmK   | NE | 1609398 | 1610531 | 377  | - | 6985237 | COG3839G  | sugar ABC transporter ATP-binding protein                                                 |
| Spy49_1629c | lrp    | NE | 1610829 | 1611722 | 297  | - | 6985238 | COG2508TQ | hypothetical protein Spy49_1629c                                                          |
| Spy49_1630  | ska    | NE | 1612017 | 1613339 | 440  | + | 6985239 | -         | streptokinase                                                                             |
| Spy49_1631c | dtd    | NE | 1613437 | 1613880 | 147  | - | 6985240 | COG1490J  | D-tyrosyl-tRNA(Tyr) deacylase                                                             |
| Spy49_1632c | relA   | C  | 1613895 | 1616114 | 739  | - | 6985241 | COG0317TK | GTP pyrophosphokinase / Guanosine- 3,5-bis(Diphosphate) 3-pyrophosphohydrolase            |
| Spy49_1633c | sclA   | NE | 1616358 | 1617626 | 422  | - | 6985242 | -         | Collagen-like surface protein                                                             |
| Spy49_1634  | nrdI2  | NE | 1618008 | 1618490 | 160  | + | 6985243 | COG1780F  | flavoprotein NrdI                                                                         |
| Spy49_1635c | -      | NE | 1618883 | 1619701 | 272  | - | 6985244 | COG3568R  | hypothetical protein Spy49_1635c                                                          |
| Spy49_1636c | -      | NE | 1619784 | 1621970 | 728  | - | 6985245 | COG1263G  | PTS system glucose-specific IIB component                                                 |
| Spy49_1637c | -      | NE | 1622326 | 1623075 | 249  | - | 6985246 | COG1385S  | 16S ribosomal RNA methyltransferase RsmE                                                  |
| Spy49_1638c | prmA   | NE | 1623075 | 1624028 | 317  | - | 6985247 | COG2264J  | ribosomal protein L11 methyltransferase                                                   |
| Spy49_1639c | nudC   | NE | 1624045 | 1625127 | 360  | - | 6985248 | -         | hypothetical protein Spy49_1639c                                                          |
| Spy49_1640c | nudB   | NE | 1625304 | 1625660 | 118  | - | 6985249 | COG1051F  | MutT/nudix family protein                                                                 |
| Spy49_1641c | nudA   | NE | 1625688 | 1626005 | 105  | - | 6985250 | COG4043S  | hypothetical protein Spy49_1641c                                                          |
| Spy49_1642c | -      | NE | 1626019 | 1626489 | 156  | - | 6985251 | -         | hypothetical protein Spy49_1642c                                                          |
| Spy49_1643c | -      | NC | 1626554 | 1626673 | 39   | - | 6985252 | -         | hypothetical protein Spy49_1643c                                                          |
| Spy49_1644c | -      | NE | 1626954 | 1627532 | 192  | - | 6985253 | COG2801L  | transposase                                                                               |
| Spy49_1646c | -      | NE | 1627693 | 1627983 | 96   | - | 6985254 | -         | transposase                                                                               |
| Spy49_1647c | -      | NE | 1628038 | 1628844 | 268  | - | 6985255 | COG2801L  | transposase, IS861                                                                        |
| Spy49_1649c | -      | NE | 1629499 | 1629813 | 104  | - | 6985256 | -         | hypothetical protein Spy49_1649c                                                          |
| Spy49_1651  | -      | NE | 1630202 | 1630438 | 78   | + | 6985257 | -         | hypothetical protein Spy49_1651                                                           |
| Spy49_1652  | -      | NC | 1630510 | 1630704 | 64   | + | 6985258 | -         | hypothetical protein Spy49_1652                                                           |
| Spy49_1653  | papB   | NE | 1630830 | 1632587 | 585  | + | 6985259 | COG0147EH | Para-aminobenzoate synthase, aminase component / aminodeoxychorismate lyase               |
| Spy49_1654  | trpG   | NE | 1632620 | 1633186 | 188  | + | 6985260 | COG0512EH | anthranilate synthase component II                                                        |
| Spy49_1655  | -      | NE | 1633219 | 1634487 | 422  | + | 6985261 | COG2256L  | recombination factor protein RarA                                                         |
| Spy49_1656  | pai1   | NE | 1634985 | 1635425 | 146  | + | 6985263 | COG3153R  | Pai1 protein                                                                              |
| Spy49_1657  | -      | NE | 1635460 | 1635966 | 168  | + | 6985264 | COG0563F  | topology modulation protein                                                               |
| Spy49_1658c | -      | NE | 1636090 | 1636425 | 111  | - | 6985265 | -         | hypothetical protein Spy49_1658c                                                          |
| Spy49_1659c | -      | NE | 1636435 | 1637079 | 214  | - | 6985266 | -         | hypothetical protein Spy49_1659c                                                          |
| Spy49_1660  | dppA   | NE | 1638159 | 1639649 | 496  | + | 6985267 | COG0747E  | peptide ABC transporter substrate-binding protein                                         |
| Spy49_1661  | dppB   | NE | 1639762 | 1640739 | 325  | + | 6985268 | COG0601EP | peptide ABC transporter permease                                                          |
| Spy49_1662  | dppC   | NE | 1640736 | 1641557 | 273  | + | 6985269 | COG1173EP | peptide ABC transporter permease                                                          |
| Spy49_1663  | dppD   | NE | 1641569 | 1642372 | 267  | + | 6985270 | COG0444EP | peptide ABC transporter ATP-binding protein                                               |
| Spy49_1664  | dppF   | NE | 1642356 | 1642982 | 208  | + | 6985271 | COG1124EP | peptide ABC transporter ATP-binding protein dppF                                          |
| Spy49_1665c | -      | NE | 1643064 | 1643264 | 66   | - | 6985272 | -         | hypothetical protein Spy49_1665c                                                          |
| Spy49_1666c | -      | NE | 1643433 | 1645904 | 823  | - | 6985273 | -         | hypothetical protein Spy49_1666c                                                          |
| Spy49_1667c | lmb    | NE | 1645917 | 1646837 | 306  | - | 6985274 | COG0803P  | laminin-binding surface protein                                                           |
| Spy49_1668c | -      | NE | 1647073 | 1648410 | 445  | - | 6985275 | -         | cell surface/fibronectin-binding protein                                                  |
| Spy49_1669c | scpA   | NE | 1648661 | 1652050 | 1129 | - | 6985276 | COG1404O  | C5a peptidase                                                                             |
| Spy49_1670c | ennX   | NE | 1652385 | 1653491 | 368  | - | 6985277 | COG1196D  | EnnX protein                                                                              |
| Spy49_1671c | emm49  | NE | 1653701 | 1654858 | 385  | - | 6985278 | -         | Antiphagocytic M protein                                                                  |
| Spy49_1672c | -      | NE | 1655083 | 1656330 | 415  | - | 6985279 | COG1196D  | Fc-gamma receptor                                                                         |
| Spy49_1673c | mga    | NE | 1656520 | 1658121 | 533  | - | 6985280 | -         | M protein trans-acting positive regulator (Mga)                                           |
| Spy49_1674c | -      | NE | 1658797 | 1659048 | 83   | - | 6985281 | -         | hypothetical protein Spy49_1674c                                                          |
| Spy49_1675c | isp1   | NE | 1659126 | 1660754 | 542  | - | 6985282 | COG3942R  | Immunogenic secreted protein                                                              |
| Spy49_1676c | -      | NE | 1660856 | 1662244 | 462  | - | 6985283 | COG0642T  | two-component system histidine kinase                                                     |
| Spy49_1677c | -      | NE | 1662241 | 1662894 | 217  | - | 6985284 | COG0745TK | two-component system response regulator                                                   |
| Spy49_1678c | -      | NE | 1662988 | 1664205 | 405  | - | 6985285 | COG0577V  | ABC transporter                                                                           |
| Spy49_1679c | -      | NE | 1664218 | 1664892 | 224  | - | 6985286 | COG1136V  | ABC transporter ATP-binding protein                                                       |
| Spy49_1680c | -      | NE | 1664879 | 1666147 | 422  | - | 6985287 | COG0845M  | ATP-binding cassette transporter protein                                                  |
| Spy49_1681c | -      | NE | 1666571 | 1666975 | 134  | - | 6985288 | -         | hypothetical protein Spy49_1681c                                                          |
| Spy49_1682c | -      | NE | 1667002 | 1667298 | 98   | - | 6985289 | -         | hypothetical protein Spy49_1682c                                                          |
| Spy49_1683c | sfbX49 | NE | 1667440 | 1669395 | 651  | - | 6985290 | -         | fibronectin-binding protein                                                               |
| Spy49_1684c | sof    | NE | 1669575 | 1672655 | 1026 | - | 6985291 | -         | Serum opacity factor                                                                      |
| Spy49_1686  | -      | NE | 1673078 | 1673314 | 78   | + | 6985292 | -         | hypothetical protein Spy49_1686                                                           |
| Spy49_1687c | ropA   | NE | 1673590 | 1674540 | 316  | - | 6985293 | -         | foldase PrsA                                                                              |
| Spy49_1688c | -      | NE | 1674572 | 1674889 | 105  | - | 6985294 | -         | hypothetical protein Spy49_1688c                                                          |
| Spy49_1689c | -      | C  | 1674997 | 1675302 | 101  | - | 6985295 | -         | Spi SpeB protease inhibitor                                                               |
| Spy49_1690c | speB   | NE | 1675304 | 1676500 | 398  | - | 6985296 | -         | streptococcal cysteine protease (streptopain) / streptococcal pyrogenic exotoxin B (SpeB) |
| Spy49_1691  | ropB   | NE | 1677441 | 1678283 | 280  | + | 6985297 | -         | RopB                                                                                      |
| Spy49_1692c | mf1    | NE | 1678512 | 1679342 | 276  | - | 6985298 | -         | streptodornase B / Mitogenic factor 1                                                     |
| Spy49_1693  | -      | NC | 1679426 | 1679554 | 42   | + | 6985299 | -         | hypothetical protein Spy49_1693                                                           |
| Spy49_1694  | -      | NE | 1679707 | 1680216 | 169  | + | 6985300 | COG1267I  | low temperature requirement C protein                                                     |
| Spy49_1695c | gldA   | NE | 1680285 | 1681373 | 362  | - | 6985301 | COG0371C  | glycerol dehydrogenase                                                                    |
| Spy49_1696c | mipB   | NE | 1681430 | 1682098 | 222  | - | 6985302 | COG0176G  | fructose-6-phosphate aldolase                                                             |
| Spy49_1697c | pfID   | NE | 1682111 | 1684528 | 805  | - | 6985383 | COG1882C  | pyruvate formate lyase 3                                                                  |
| Spy49_1698c | -      | NE | 1684739 | 1686043 | 434  | - | 6985384 | COG1455G  | PTS system cellobiose-specific IIC component                                              |
| Spy49_1699c | -      | NE | 1686053 | 1686361 | 102  | - | 6985385 | COG1440G  | PTS system cellobiose-specific IIB component                                              |
| Spy49_1700c | -      | NE | 1686389 | 1686709 | 106  | - | 6985386 | COG1447G  | PTS system enzyme III                                                                     |
| Spy49_1701c | -      | NE | 1686996 | 1687976 | 326  | - | 6985387 | COG2390K  | transcriptional regulator                                                                 |
| Spy49_1702c | -      | NE | 1687992 | 1688741 | 249  | - | 6985388 | COG1349KG | DeoR family transcriptional regulator                                                     |
| Spy49_1703  | -      | NE | 1688864 | 1689637 | 257  | + | 6985389 | COG1180O  | pyruvate formate-lyase activating enzyme                                                  |
| Spy49_1704c | secE   | NC | 1689873 | 1690049 | 58   | - | 6985390 | COG0690U  | preprotein translocase subunit SecE                                                       |
| Spy49_1705c | rpmG   | NE | 1690063 | 1690215 | 50   | - | 6985391 | COG0267J  | 50S ribosomal protein L33                                                                 |
| Spy49_1706c | pbp2A  | NE | 1690264 | 1692600 | 778  | - | 6985392 | COG0744M  | multimodular transpeptidase-transglycosylase                                              |
| Spy49_1707c | -      | NE | 1692639 | 1693019 | 126  | - | 6985393 | COG0251J  | translation initiation inhibitor                                                          |
| Spy49_1708  | -      | NE | 1693510 | 1693701 | 63   | + | 6985394 | -         | hypothetical protein Spy49_1708                                                           |
| Spy49_1709  | -      | NE | 1693595 | 1694596 | 333  | + | 6985395 | COG0564J  | ribosomal large subunit pseudouridine synthase                                            |
| Spy49_1710c | -      | NE | 1694685 | 1696409 | 574  | - | 6985396 | COG4640S  | hypothetical protein Spy49_1710c                                                          |
| Spy49_1713  | -      | NE | 1696572 | 1698071 | 499  | + | 6985397 | COG4690E  | dipeptidase                                                                               |
| Spy49_1714c | -      | NE | 1698783 | 1699130 | 115  | - | 6985398 | COG1395K  | transcriptional regulator                                                                 |

|             |       |    |         |         |      |   |         |          |                                                                       |
|-------------|-------|----|---------|---------|------|---|---------|----------|-----------------------------------------------------------------------|
| Spy49_1715c | groEL | E  | 1699290 | 1700921 | 543  | - | 6985399 | COG04590 | molecular chaperone GroEL                                             |
| Spy49_1716c | groES | NC | 1700957 | 1701247 | 96   | - | 6985400 | COG02340 | molecular chaperone GroES                                             |
| Spy49_1717c | clpC  | NE | 1701425 | 1703869 | 814  | - | 6985401 | COG05420 | endopeptidase Clp ATP-binding protein C                               |
| Spy49_1718c | ctsR  | NE | 1703869 | 1704330 | 153  | - | 6985402 | COG4463K | transcriptional regulator                                             |
| Spy49_1719c | csp   | NE | 1704526 | 1704735 | 69   | - | 6985403 | COG1278K | Major cold-shock protein                                              |
| Spy49_1720c | -     | NE | 1705476 | 1706609 | 377  | - | 6985405 | COG5433L | transposase                                                           |
| Spy49_1721  | ahpC  | NE | 1707061 | 1707621 | 186  | + | 6985406 | COG04500 | alkyl hydroperoxide reductase C                                       |
| Spy49_1722  | nox3  | NE | 1707642 | 1709174 | 510  | + | 6985407 | COG36340 | alkyl hydroperoxide reductase F                                       |
| Spy49_1723c | hutI  | NE | 1709232 | 1710497 | 421  | - | 6985408 | COG1228Q | imidazolonepropionase                                                 |
| Spy49_1724  | hutU  | NE | 1710789 | 1712819 | 676  | + | 6985409 | COG2987E | urocanate hydratase                                                   |
| Spy49_1725  | -     | NE | 1712907 | 1713806 | 299  | + | 6985410 | COG3643E | glutamate formiminotransferase                                        |
| Spy49_1726  | -     | NE | 1713817 | 1714443 | 208  | + | 6985411 | COG3404E | formiminotetrahydrofolate cyclodeaminase                              |
| Spy49_1727  | fhx2  | NE | 1714461 | 1716134 | 557  | + | 6985412 | COG2759F | formate-tetrahydrofolate ligase                                       |
| Spy49_1728  | -     | NE | 1716155 | 1716751 | 198  | + | 6985413 | COG3758S | hypothetical protein Spy49_1728                                       |
| Spy49_1729  | -     | NE | 1716971 | 1718314 | 447  | + | 6985414 | COG0531E | cationic amino acid transporter protein                               |
| Spy49_1730  | hutH  | NE | 1718326 | 1719867 | 513  | + | 6985415 | COG2986E | histidine ammonia-lyase                                               |
| Spy49_1731  | hutG  | NE | 1720054 | 1721040 | 328  | + | 6985416 | COG0010E | formimidoylglutamate                                                  |
| Spy49_1732c | -     | NE | 1721071 | 1724145 | 1024 | - | 6985417 | COG3899R | regulatory protein                                                    |
| Spy49_1733  | rpsB  | E  | 1724449 | 1725216 | 255  | + | 6985418 | COG0052J | 30S ribosomal protein S2                                              |
| Spy49_1734  | tsf   | E  | 1725350 | 1726390 | 346  | + | 6985419 | COG0264J | elongation factor Ts                                                  |
| Spy49_1735c | pepO  | NC | 1726556 | 1728451 | 631  | - | 6985420 | COG35900 | endopeptidase O                                                       |
| Spy49_1736c | dexS  | E  | 1728659 | 1730287 | 542  | - | 6985421 | COG0366G | trehalose-6-phosphate hydrolase                                       |
| Spy49_1737c | -     | NC | 1730354 | 1732378 | 674  | - | 6985422 | COG1263G | PTS system enzyme II                                                  |
| Spy49_1738  | -     | NE | 1732589 | 1733302 | 237  | + | 6985423 | COG1288K | trehalose operon transcriptional repressor                            |
| Spy49_1739c | -     | NE | 1733581 | 1733820 | 79   | - | 6985424 | COG1733K | hypothetical protein Spy49_1739c                                      |
| Spy49_1740  | -     | NE | 1734105 | 1734962 | 285  | + | 6985425 | COG2514R | glyoxalase                                                            |
| Spy49_1742  | -     | NE | 1735004 | 1735735 | 243  | + | 6985426 | COG3022S | hypothetical protein Spy49_1742                                       |
| Spy49_1743c | nrdG  | NC | 1735909 | 1736523 | 204  | - | 6985427 | COG0602O | ribonucleotide reductase of class III (anaerobic), activating protein |
| Spy49_1744c | -     | NE | 1736523 | 1737032 | 169  | - | 6985428 | COG3981R | hypothetical protein Spy49_1744c                                      |
| Spy49_1745c | -     | E  | 1737041 | 1737976 | 311  | - | 6985429 | COG0673R | oxidoreductase                                                        |
| Spy49_1746c | -     | NC | 1738005 | 1738151 | 48   | - | 6985430 | -        | hypothetical protein Spy49_1746c                                      |
| Spy49_1747c | nrdD  | NC | 1738333 | 1740531 | 732  | - | 6985431 | COG1328F | anaerobic ribonucleoside triphosphate reductase                       |
| Spy49_1748c | -     | NE | 1740628 | 1742187 | 519  | - | 6985432 | -        | hypothetical protein Spy49_1748c                                      |
| Spy49_1749c | -     | NE | 1742600 | 1742905 | 101  | - | 6985433 | COG3906S | hypothetical protein Spy49_1749c                                      |
| Spy49_1750c | -     | NE | 1742917 | 1743336 | 139  | - | 6985434 | COG0816L | Holliday junction resolvase-like protein                              |
| Spy49_1751c | -     | NE | 1743333 | 1743602 | 89   | - | 6985435 | COG4472S | hypothetical protein Spy49_1751c                                      |
| Spy49_1752c | spxA  | NE | 1743716 | 1744114 | 132  | - | 6985436 | COG1393P | transcriptional regulator Spx                                         |
| Spy49_1753c | recA  | NC | 1744405 | 1745541 | 378  | - | 6985437 | COG0468L | recombinase A                                                         |
| Spy49_1754c | cinA  | NE | 1745629 | 1746900 | 423  | - | 6985438 | COG1058R | competence damage-inducible protein A                                 |
| Spy49_1755c | tag   | NE | 1746969 | 1747529 | 186  | - | 6985439 | COG2818L | DNA-3-methyladenine glycosylase                                       |
| Spy49_1756c | ruvA  | C  | 1747539 | 1748135 | 198  | - | 6985440 | COG0632L | Holliday junction DNA helicase RuvA                                   |
| Spy49_1757c | lmrP  | C  | 1748137 | 1749357 | 406  | - | 6985441 | -        | integral membrane protein                                             |
| Spy49_1758c | mutL  | C  | 1749368 | 1751350 | 660  | - | 6985442 | COG0323L | DNA mismatch repair protein                                           |
| Spy49_1759c | mutS  | NC | 1751480 | 1754035 | 851  | - | 6985443 | COG0249L | DNA mismatch repair protein MutS                                      |
| Spy49_1761c | -     | NE | 1754371 | 1754706 | 111  | - | 6985444 | COG1438K | arginine repressor                                                    |
| Spy49_1762  | argS  | E  | 1755099 | 1756790 | 563  | + | 6985445 | COG0018J | arginyl-tRNA synthetase                                               |
| Spy49_1763  | -     | NE | 1756878 | 1757186 | 102  | + | 6985446 | -        | hypothetical protein Spy49_1763                                       |
| Spy49_1764c | -     | NE | 1757213 | 1758085 | 290  | - | 6985447 | COG1284S | hypothetical protein Spy49_1764c                                      |
| Spy49_1765c | -     | NE | 1758128 | 1759063 | 311  | - | 6985448 | COG1284S | hypothetical protein Spy49_1765c                                      |
| Spy49_1767c | -     | NE | 1759026 | 1759967 | 313  | - | 6985449 | COG1284S | hypothetical protein Spy49_1767c                                      |
| Spy49_1768c | aspS  | E  | 1759960 | 1761708 | 582  | - | 6985450 | COG0173J | aspartyl-tRNA synthetase                                              |
| Spy49_1769c | hisS  | E  | 1762046 | 1763326 | 426  | - | 6985451 | COG0124J | histidyl-tRNA synthetase                                              |
| Spy49_1770  | rpmF  | NE | 1763546 | 1763728 | 60   | + | 6985452 | COG0333J | 50S ribosomal protein L32                                             |
| Spy49_1771  | rpmG  | NC | 1763744 | 1763893 | 49   | + | 6985453 | COG0267J | 50S ribosomal protein L33                                             |
| Spy49_1772c | -     | NE | 1763933 | 1764157 | 74   | - | 6985454 | -        | hypothetical protein Spy49_1772c                                      |
| Spy49_1773  | cadD  | NE | 1764186 | 1764800 | 204  | + | 6985455 | COG4300P | Cadmium resistance protein                                            |
| Spy49_1774  | cadX  | NE | 1764812 | 1765150 | 112  | + | 6985456 | COG0640K | cadmium efflux system accessory                                       |
| Spy49_1775  | -     | NE | 1765194 | 1766117 | 307  | + | 6985457 | -        | hypothetical protein Spy49_1775                                       |
| Spy49_1777  | -     | NE | 1766183 | 1766935 | 250  | + | 6985458 | COG1674D | hypothetical protein Spy49_1777                                       |
| Spy49_1778  | -     | NE | 1766932 | 1767534 | 200  | + | 6985459 | -        | hypothetical protein Spy49_1778                                       |
| Spy49_1779  | -     | NE | 1768745 | 1769587 | 280  | + | 6985460 | COG2035S | hypothetical protein Spy49_1779                                       |
| Spy49_1780c | -     | NE | 1769591 | 1770274 | 227  | - | 6985461 | COG1051F | hypothetical protein Spy49_1780c                                      |
| Spy49_1781  | -     | NE | 1770481 | 1770807 | 108  | + | 6985462 | COG1695K | hypothetical protein Spy49_1781                                       |
| Spy49_1782  | -     | NE | 1770794 | 1771381 | 195  | + | 6986105 | COG4709S | hypothetical protein Spy49_1782                                       |
| Spy49_1783  | -     | NE | 1771378 | 1772451 | 357  | + | 6986106 | COG0572F | hypothetical protein Spy49_1783                                       |
| Spy49_1784c | -     | NC | 1772567 | 1774861 | 764  | - | 6986107 | COG1511S | phage infection protein                                               |
| Spy49_1785  | -     | NE | 1774975 | 1775511 | 178  | + | 6986108 | COG1309K | transcriptional regulator                                             |
| Spy49_1786c | rpsD  | E  | 1775661 | 1776272 | 203  | - | 6986109 | COG0522J | 30S ribosomal protein S4                                              |
| Spy49_1787c | -     | NE | 1777001 | 1777273 | 90   | - | 6986110 | COG4466S | hypothetical protein Spy49_1787c                                      |
| Spy49_1788c | dnaC  | E  | 1777290 | 1778657 | 455  | - | 6986111 | COG0305L | replicative DNA helicase                                              |
| Spy49_1789c | rplI  | NC | 1778687 | 1779139 | 150  | - | 6986112 | COG0359J | 50S ribosomal protein L9                                              |
| Spy49_1790c | -     | E  | 1779136 | 1781112 | 658  | - | 6986113 | COG3887T | DHH family protein                                                    |
| Spy49_1791c | gidA  | E  | 1781202 | 1783100 | 632  | - | 6986114 | COG0445D | tRNA uridine 5-carboxymethylaminomethyl modification protein GidA     |
| Spy49_1792c | -     | NE | 1783224 | 1783541 | 105  | - | 6986115 | COG1051F | hypothetical protein Spy49_1792c                                      |
| Spy49_1793c | mnmA  | E  | 1784316 | 1785437 | 373  | - | 6986116 | COG0482J | tRNA-specific 2-thiouridylase MnmA                                    |
| Spy49_1794  | sdhB  | NE | 1785735 | 1786406 | 223  | + | 6986117 | COG1760E | L-serine dehydratase subunit beta                                     |
| Spy49_1795  | sdhA  | NE | 1786418 | 1787290 | 290  | + | 6986118 | COG1760E | L-serine dehydratase subunit alpha                                    |
| Spy49_1796c | -     | NE | 1787704 | 1788318 | 204  | - | 6986119 | -        | hypothetical protein Spy49_1796c                                      |
| Spy49_1797c | -     | E  | 1788690 | 1789490 | 266  | - | 6986120 | COG0619P | cobalt ABC transporter permease                                       |
| Spy49_1798c | cbiO  | E  | 1789483 | 1790325 | 280  | - | 6986121 | COG1122P | cobalt transporter ATP-binding protein                                |
| Spy49_1799c | cbiO  | E  | 1790301 | 1791191 | 296  | - | 6986122 | COG1122P | cobalt transporter ATP-binding protein                                |
| Spy49_1800c | pgsA  | E  | 1791142 | 1791684 | 180  | - | 6986123 | COG0558I | CDP-diaclyglycerol-glycerol-3-phosphate 3-phosphatidyltransferase     |
| Spy49_1801c | -     | NE | 1791698 | 1792723 | 341  | - | 6986124 | COG1426S | hypothetical protein Spy49_1801c                                      |
| Spy49_1802c | -     | NE | 1792773 | 1794062 | 429  | - | 6986125 | COG0612R | hypothetical protein Spy49_1802c                                      |
| Spy49_1803c | -     | NE | 1794064 | 1795308 | 414  | - | 6986126 | COG0612R | hypothetical protein Spy49_1803c                                      |
| Spy49_1804  | hasA  | NE | 1795670 | 1797007 | 445  | + | 6986127 | COG1215M | hyaluronan synthase                                                   |
| Spy49_1806  | hasB  | NE | 1797043 | 1798251 | 402  | + | 6986128 | COG1004M | UDP-glucose 6-dehydrogenase                                           |
| Spy49_1808  | hasC  | NE | 1798433 | 1799347 | 304  | + | 6986129 | COG1210M | UDP-glucose pyrophosphorylase                                         |
| Spy49_1809  | -     | NE | 1799655 | 1800068 | 137  | + | 6986130 | COG2501S | hypothetical protein Spy49_1809                                       |
| Spy49_1810  | recF  | NE | 1800070 | 1801176 | 368  | + | 6986131 | COG1195L | recombination protein F                                               |
| Spy49_1811c | -     | NE | 1801232 | 1802095 | 287  | - | 6986132 | COG4975G | hypothetical protein Spy49_1811c                                      |
| Spy49_1812c | guaB  | NE | 1802298 | 1803779 | 493  | - | 6986133 | COG0516F | inosine 5'-monophosphate dehydrogenase                                |
| Spy49_1813c | trsA  | E  | 1804087 | 1805109 | 340  | - | 6986134 | COG0180J | tryptophanyl-tRNA synthetase II                                       |
| Spy49_1814  | -     | NE | 1805528 | 1806400 | 290  | + | 6986135 | COG1284S | hypothetical protein Spy49_1814                                       |
| Spy49_1815  | -     | NE | 1806479 | 1808086 | 535  | + | 6986136 | COG0488R | ABC transporter ATP-binding protein                                   |
| Spy49_1817  | -     | NE | 1808184 | 1810760 | 858  | + | 6986137 | COG4485S | ABC transporter permease                                              |
| Spy49_1820c | -     | NE | 1813005 | 1813484 | 159  | - | 6986141 | COG1576S | rRNA large subunit methyltransferase                                  |
| Spy49_1821  | degP  | E  | 1813696 | 1814919 | 407  | + | 6986142 | COG0265O | endopeptidase degP                                                    |
| Spy49_1822  | parB  | NE | 1814978 | 1815784 | 268  | + | 6986143 | COG1475K | Chromosome partitioning protein parB                                  |

**Table S7. Conserved GAS essential genes identified in both M1T1 5448 and M49 NZ131 compared to the predicted GAS core genome.**

- (a) Spy numbers from MGASS005 genome.  
 (b) Hyperlink to the NCBI Gene website (<http://www.ncbi.nlm.nih.gov/gene>).  
 (c) Call integrating data from Bayesian analyses on 3 time points.  
 (d) Spy numbers from GAS NZ131 genome.  
 (e) When available, gene name is provided.  
 (f) Asterisks refer to genes found in the GAS core genome.  
 (g) *S. sanguinis* ortholog found essential.  
 (h) *S. pneumoniae* ortholog found essential.

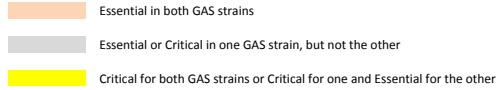

| GAS M1T1 5448   |                         |         | GAS M49 NZ131 |                         |         | Gene             | GAS Core Genome(f) | Found essential in other Strep. species |                          | Protein Function                                                                          |
|-----------------|-------------------------|---------|---------------|-------------------------|---------|------------------|--------------------|-----------------------------------------|--------------------------|-------------------------------------------------------------------------------------------|
| Locus Tag(a)    | Gene ID(b)              | Call(c) | Locus Tag(d)  | Gene ID (b)             | Call(c) | Name(e)          |                    | <i>S. sanguinis</i> (g)                 | <i>S. pneumoniae</i> (h) |                                                                                           |
| M5005_Spy_0001  | <a href="#">3571011</a> | E       | Spy49_0001    | <a href="#">6986144</a> | NC      | dnaA             | *                  | SSA_0001                                | SP_0001                  | chromosome replication initiator DnaA                                                     |
| M5005_Spy_0002  | <a href="#">3571012</a> | E       | Spy49_0002    | <a href="#">6984517</a> | E       | <b>dnaN</b>      | *                  | SSA_0002                                | SP_0002                  | DNA polymerase III subunit beta                                                           |
| M5005_Spy_0003  | <a href="#">3571013</a> | NE      | Spy49_0003    | <a href="#">6984518</a> | NE      | -                |                    |                                         |                          | hypothetical protein M5005_Spy_0003                                                       |
| M5005_Spy_0004  | <a href="#">3571014</a> | NE      | Spy49_0004    | <a href="#">6984519</a> | NE      | ychF             | *                  |                                         |                          | GTP-dependent nucleic acid-binding protein EngD                                           |
| M5005_Spy_0005  | <a href="#">3571015</a> | NC      | Spy49_0005    | <a href="#">6984520</a> | E       | pth              | *                  | SSA_0006                                |                          | peptidyl-tRNA hydrolase                                                                   |
| M5005_Spy_0006  | <a href="#">3571016</a> | NE      | Spy49_0006    | <a href="#">6984521</a> | NE      | trcF             | *                  |                                         |                          | transcription-repair coupling factor                                                      |
| M5005_Spy_0007  | <a href="#">3572946</a> | NE      | Spy49_0008    | <a href="#">6984522</a> | NE      | -                |                    |                                         |                          | heat shock protein 15                                                                     |
| M5005_Spy_0008  | <a href="#">3572947</a> | NE      | Spy49_0009    | <a href="#">6984523</a> | NC      | divIC            | *                  |                                         |                          | cell division protein                                                                     |
| M5005_Spy_0009  | <a href="#">3572948</a> | NC      | -             | -                       | -       | -                |                    |                                         |                          | hypothetical protein M5005_Spy_0009                                                       |
| M5005_Spy_0010  | <a href="#">3572949</a> | NE      | Spy49_0010    | <a href="#">6984524</a> | NE      | -                | *                  |                                         |                          | beta-lactamase                                                                            |
| M5005_Spy_0011  | <a href="#">3572950</a> | E       | Spy49_0011    | <a href="#">6984525</a> | E       | <b>tlis/mesJ</b> | *                  | SSA_0013                                | SP_0011                  | tRNA(Ile)-lysidine synthetase                                                             |
| M5005_Spy_0012  | <a href="#">3572951</a> | NC      | Spy49_0012    | <a href="#">6984526</a> | NE      | hpt              | *                  |                                         |                          | hypoxanthine-guanine phosphoribosyltransferase                                            |
| M5005_Spy_0013  | <a href="#">3572952</a> | E       | Spy49_0013    | <a href="#">6984527</a> | E       | <b>ftsH</b>      | *                  |                                         | SP_0013                  | cell division protein                                                                     |
| M5005_Spy_0014  | <a href="#">3572953</a> | NE      | Spy49_0014    | <a href="#">6984528</a> | NE      | -                |                    |                                         |                          | amino acid permease                                                                       |
| M5005_Spy_0015c | <a href="#">3572954</a> | NC      | -             | -                       | -       | -                |                    |                                         |                          | hypothetical protein M5005_Spy_0015                                                       |
| M5005_Spy_0017  | <a href="#">3572901</a> | E       | Spy49_0015    | <a href="#">6984563</a> | E       | <b>sibA</b>      | *                  |                                         | SP_2216                  | secreted protein                                                                          |
| M5005_Spy_0018  | <a href="#">3572902</a> | E       | Spy49_0016    | <a href="#">6984564</a> | E       | <b>prsA.2</b>    | *                  |                                         |                          | ribose-phosphate pyrophosphokinase                                                        |
| M5005_Spy_0019  | <a href="#">3572903</a> | NE      | Spy49_0017    | <a href="#">6984565</a> | NE      | recO             | *                  |                                         |                          | DNA repair protein RecO                                                                   |
| M5005_Spy_0020  | <a href="#">3572904</a> | E       | Spy49_0018    | <a href="#">6984566</a> | E       | <b>plsX</b>      | *                  |                                         | SP_0027                  | glycerol-3-phosphate acyltransferase                                                      |
| M5005_Spy_0021  | <a href="#">3572905</a> | NC      | Spy49_0019    | <a href="#">6984567</a> | NC      | acpP.2           | *                  |                                         |                          | acyl carrier protein                                                                      |
| M5005_Spy_0022  | <a href="#">3572906</a> | NC      | Spy49_0020    | <a href="#">6984568</a> | NE      | purC             | *                  |                                         |                          | phosphoribosylaminoimidazole-succinocarboxamide synthase                                  |
| M5005_Spy_0023  | <a href="#">3572907</a> | NE      | Spy49_0021    | <a href="#">6984569</a> | NE      | purL             | *                  |                                         |                          | phosphoribosylformylglycinamide synthase                                                  |
| M5005_Spy_0024  | <a href="#">3572908</a> | NE      | Spy49_0022    | <a href="#">6984570</a> | NE      | purF             | *                  |                                         |                          | amidophosphoribosyltransferase                                                            |
| M5005_Spy_0025  | <a href="#">3572909</a> | NE      | Spy49_0023    | <a href="#">6984571</a> | NE      | purM             | *                  |                                         |                          | phosphoribosylaminoimidazole synthetase                                                   |
| M5005_Spy_0026  | <a href="#">3572910</a> | NE      | Spy49_0024    | <a href="#">6984572</a> | NE      | purN             | *                  |                                         |                          | phosphoribosylglycinamide formyltransferase                                               |
| M5005_Spy_0027  | <a href="#">3572911</a> | NE      | Spy49_0025    | <a href="#">6984573</a> | NE      | purH             | *                  |                                         |                          | bifunctional phosphoribosylaminoimidazolecarboxamide formyltransferase/IMP cyclohydrolase |
| M5005_Spy_0028c | <a href="#">3572912</a> | NE      | Spy49_0026c   | <a href="#">6984574</a> | NE      | -                | *                  |                                         |                          | autolysin                                                                                 |
| M5005_Spy_0029  | <a href="#">3572913</a> | NE      | Spy49_0027    | <a href="#">6984575</a> | NE      | purD             | *                  |                                         |                          | phosphoribosylamine--glycine ligase                                                       |
| M5005_Spy_0030  | <a href="#">3572914</a> | NE      | Spy49_0028    | <a href="#">6984576</a> | NE      | purE             | *                  |                                         |                          | phosphoribosylaminoimidazole carboxylase catalytic subunit                                |
| M5005_Spy_0031  | <a href="#">3572915</a> | NE      | Spy49_0029    | <a href="#">6984577</a> | NE      | purK             | *                  |                                         |                          | phosphoribosylaminoimidazole carboxylase ATPase subunit                                   |
| M5005_Spy_0032  | <a href="#">3572916</a> | NE      | Spy49_0030    | <a href="#">6984578</a> | NE      | -                | *                  |                                         |                          | hypothetical protein M5005_Spy_0032                                                       |
| M5005_Spy_0033  | <a href="#">3572917</a> | NE      | Spy49_0031    | <a href="#">6984579</a> | NE      | purB             | *                  |                                         |                          | adenylosuccinate lyase                                                                    |
| M5005_Spy_0034  | <a href="#">3572880</a> | NE      | Spy49_0032    | <a href="#">6984580</a> | NE      | -                | *                  |                                         |                          | transcriptional regulator                                                                 |
| M5005_Spy_0035  | <a href="#">3572881</a> | NE      | Spy49_0033    | <a href="#">6984581</a> | C       | ruvB             | *                  |                                         | SP_0259                  | Holliday junction DNA helicase RuvB                                                       |
| M5005_Spy_0036  | <a href="#">3572882</a> | NE      | Spy49_0035    | <a href="#">6984582</a> | NE      | -                | *                  |                                         |                          | protein tyrosine phosphatase                                                              |
| M5005_Spy_0037  | <a href="#">3572883</a> | NC      | Spy49_0036    | <a href="#">6984663</a> | E       | -                | *                  |                                         |                          | hypothetical protein M5005_Spy_0037                                                       |
| M5005_Spy_0038  | <a href="#">3572884</a> | E       | Spy49_0037    | <a href="#">6984664</a> | E       | -                | *                  |                                         |                          | acyltransferase                                                                           |
| M5005_Spy_0039  | <a href="#">3572885</a> | NE      | Spy49_0038    | <a href="#">6984665</a> | NE      | adh2/adhE        | *                  |                                         |                          | bifunctional acetaldehyde-CoA/alcohol dehydrogenase                                       |
| M5005_Spy_0040  | <a href="#">3572886</a> | NE      | Spy49_0039    | <a href="#">6984666</a> | NE      | adhA/adhP        | *                  |                                         |                          | alcohol dehydrogenase                                                                     |
| M5005_Spy_0041  | <a href="#">3572887</a> | NE      | Spy49_0040    | <a href="#">6984667</a> | NE      | norM             | *                  |                                         |                          | Na+ driven multidrug efflux pump                                                          |
| M5005_Spy_0043  | <a href="#">3572889</a> | E       | Spy49_0044    | <a href="#">6984668</a> | NC      | rpsJ             | *                  | SSA_0106                                | SP_0208                  | 30S ribosomal protein S10                                                                 |
| M5005_Spy_0044  | <a href="#">3572890</a> | E       | Spy49_0045    | <a href="#">6984669</a> | E       | <b>rplC</b>      | *                  | SSA_0107                                | SP_0209                  | 50S ribosomal protein L3                                                                  |
| M5005_Spy_0045  | <a href="#">3572891</a> | E       | Spy49_0046    | <a href="#">6984670</a> | NC      | rplD             | *                  | SSA_0108                                | SP_0210                  | 50S ribosomal protein L4                                                                  |
| M5005_Spy_0046  | <a href="#">3572892</a> | NE      | Spy49_0048    | <a href="#">6984671</a> | NC      | rplW             | *                  |                                         | SP_0211                  | 50S ribosomal protein L23                                                                 |
| M5005_Spy_0047  | <a href="#">3572893</a> | E       | Spy49_0049    | <a href="#">6984672</a> | E       | <b>rplB</b>      | *                  | SSA_0110                                | SP_0212                  | 50S ribosomal protein L2                                                                  |
| M5005_Spy_0048  | <a href="#">3572894</a> | C       | Spy49_0050    | <a href="#">6984673</a> | NC      | rpsS             | *                  | SSA_0111                                | SP_0213                  | 30S ribosomal protein S19                                                                 |
| M5005_Spy_0049  | <a href="#">3572895</a> | E       | Spy49_0052    | <a href="#">6984674</a> | NC      | rplV             | *                  | SSA_0112                                | SP_0214                  | 50S ribosomal protein L22                                                                 |
| M5005_Spy_0050  | <a href="#">3572896</a> | E       | Spy49_0053    | <a href="#">6984675</a> | E       | <b>rpsC</b>      | *                  | SSA_0113                                | SP_0215                  | 30S ribosomal protein S3                                                                  |
| M5005_Spy_0051  | <a href="#">3572897</a> | E       | Spy49_0054    | <a href="#">6984676</a> | E       | <b>rplP</b>      | *                  | SSA_0114                                | SP_0216                  | 50S ribosomal protein L16                                                                 |
| M5005_Spy_0052  | <a href="#">3572898</a> | NE      | Spy49_0055    | <a href="#">6984677</a> | NC      | rpmC             | *                  |                                         |                          | 50S ribosomal protein L29                                                                 |
| M5005_Spy_0053  | <a href="#">3572899</a> | NC      | Spy49_0056    | <a href="#">6984678</a> | NC      | rpsQ             | *                  |                                         |                          | 30S ribosomal protein S17                                                                 |
| M5005_Spy_0054  | <a href="#">3572861</a> | C       | Spy49_0057    | <a href="#">6984679</a> | NC      | rplN             | *                  | SSA_0117                                | SP_0219                  | 50S ribosomal protein L14                                                                 |
| M5005_Spy_0055  | <a href="#">3572862</a> | NC      | Spy49_0058    | <a href="#">6984680</a> | E       | rplX             | *                  |                                         | SP_0220                  | 50S ribosomal protein L24                                                                 |
| M5005_Spy_0056  | <a href="#">3572863</a> | NC      | Spy49_0059    | <a href="#">6984681</a> | NC      | rplE             | *                  |                                         |                          | 50S ribosomal protein L5                                                                  |
| M5005_Spy_0057  | <a href="#">3572864</a> | NC      | Spy49_0060    | <a href="#">6984682</a> | NC      | rpsN             | *                  |                                         |                          | 30S ribosomal protein S14                                                                 |
| M5005_Spy_0058  | <a href="#">3572865</a> | NC      | Spy49_0061    | <a href="#">6984683</a> | NC      | rpsH             | *                  |                                         |                          | 30S ribosomal protein S8                                                                  |
| M5005_Spy_0059  | <a href="#">3572866</a> | E       | Spy49_0062    | <a href="#">6984684</a> | E       | <b>rplF</b>      | *                  | SSA_0122                                | SP_0225                  | 50S ribosomal protein L6                                                                  |
| M5005_Spy_0060  | <a href="#">3572867</a> | NC      | Spy49_0064    | <a href="#">6984685</a> | NC      | rplR             | *                  |                                         |                          | 50S ribosomal protein L18                                                                 |
| M5005_Spy_0061  | <a href="#">3572868</a> | E       | Spy49_0065    | <a href="#">6984686</a> | NC      | rpsE             | *                  | SSA_0124                                | SP_0227                  | 30S ribosomal protein S5                                                                  |
| M5005_Spy_0062  | <a href="#">3572869</a> | E       | Spy49_0066    | <a href="#">6984687</a> | NC      | rpmD             | *                  |                                         | SP_0228                  | 50S ribosomal protein L30                                                                 |
| M5005_Spy_0063  | <a href="#">3572870</a> | NE      | Spy49_0067    | <a href="#">6984688</a> | NC      | rplO             | *                  |                                         |                          | 50S ribosomal protein L15                                                                 |
| M5005_Spy_0064  | <a href="#">3572871</a> | E       | Spy49_0068    | <a href="#">6984689</a> | E       | <b>secY</b>      | *                  | SSA_0127                                | SP_0231                  | preprotein translocase subunit SecY                                                       |
| M5005_Spy_0065  | <a href="#">3572872</a> | NC      | Spy49_0069    | <a href="#">6984690</a> | E       | adk              | *                  | SSA_0128                                |                          | adenylate kinase                                                                          |
| M5005_Spy_0066  | <a href="#">3572873</a> | E       | Spy49_0070    | <a href="#">6984691</a> | NC      | infA             | *                  | SSA_0129                                | SP_0232                  | translation initiation factor IF-1                                                        |
| M5005_Spy_0067  | <a href="#">3572874</a> | NC      | Spy49_0071    | <a href="#">6984692</a> | NC      | rpmJ             | *                  |                                         |                          | 50S ribosomal protein L36                                                                 |
| M5005_Spy_0068  | <a href="#">3572875</a> | E       | Spy49_0072    | <a href="#">6984693</a> | E       | <b>rpsM</b>      | *                  |                                         | SP_0234                  | 30S ribosomal protein S13                                                                 |
| M5005_Spy_0069  | <a href="#">3572876</a> | E       | Spy49_0073    | <a href="#">6984694</a> | NC      | rpsK             | *                  | SSA_0131                                | SP_0235                  | 30S ribosomal protein S11                                                                 |
| M5005_Spy_0070  | <a href="#">3572877</a> | E       | Spy49_0074    | <a href="#">6984695</a> | E       | <b>rpoA</b>      | *                  | SSA_0132                                | SP_0236                  | DNA-directed RNA polymerase subunit alpha                                                 |
| M5005_Spy_0071  | <a href="#">3572878</a> | E       | Spy49_0075    | <a href="#">6984696</a> | NC      | rplQ             | *                  | SSA_0133                                | SP_0237                  | 50S ribosomal protein L17                                                                 |
| M5005_Spy_0072c | <a href="#">3572879</a> | NC      | -             | -                       | -       | -                |                    |                                         |                          | hypothetical protein M5005_Spy_0072                                                       |
| M5005_Spy_0073  | <a href="#">3572845</a> | NC      | -             | -                       | -       | -                |                    |                                         |                          | hypothetical protein M5005_Spy_0073                                                       |
| M5005_Spy_0074  | <a href="#">3572846</a> | NC      | -             | -                       | -       | -                |                    |                                         |                          | 4-diphosphocytidyl-2-C-methyl-D-erythritol kinase                                         |
| M5005_Spy_0075  | <a href="#">3572847</a> | NC      | Spy49_0078    | <a href="#">6984713</a> | NE      | -                | *                  |                                         |                          | 4-diphosphocytidyl-2-C-methyl-D-erythritol kinase, partial                                |
| M5005_Spy_0076  | <a href="#">3572848</a> | NC      | Spy49_0079    | <a href="#">6984714</a> | NE      | -                | *                  |                                         |                          | 4-diphosphocytidyl-2-C-methyl-D-erythritol kinase                                         |
| M5005_Spy_0077  | <a href="#">3572849</a> | NE      | Spy49_0080    | <a href="#">6984715</a> | NE      | adcR             | *                  |                                         |                          | MarR family transcriptional regulator                                                     |
| M5005_Spy_0078  | <a href="#">3572850</a> | NE      | Spy49_0081    | <a href="#">6984716</a> | NC      | adcC             | *                  |                                         |                          | high-affinity zinc uptake system ATP-binding protein                                      |
| M5005_Spy_0079  | <a href="#">3572819</a> | NE      | Spy49_0082    | <a href="#">6984717</a> | NC      | adcB             | *                  |                                         |                          | high-affinity zinc uptake system membrane protein                                         |
| M5005_Spy_0080c | <a href="#">3572820</a> | NE      | Spy49_0083c   | <a href="#">6984718</a> | NE      | -                | *                  |                                         |                          | bis(5'-nucleosyl)-tetraphosphatase (asymmetrical)                                         |
| M5005_Spy_0081c | <a href="#">3572821</a> | E       | Spy49_0084    | <a href="#">6984719</a> | E       | <b>tyrS</b>      | *                  | SSA_0174                                | SP_2100                  | tyrosyl-tRNA synthetase                                                                   |
| M5005_Spy_0082  | <a href="#">3572822</a> | NE      | Spy49_0086    | <a href="#">6984720</a> | NE      | pbp1b            | *                  |                                         |                          | multimodular transpeptidase-transglycosylase PBP 1B                                       |
| M5005_Spy_0083  | <a href="#">3572823</a> | E       | Spy49_0087    | <a href="#">6984721</a> | E       | <b>rpoB</b>      | *                  | SSA_0176                                | SP_1961                  | DNA-directed RNA polymerase subunit beta                                                  |
| M5005_Spy_0084  | <a href="#">3572824</a> | E       | Spy49_0088    | <a href="#">6984722</a> | E       | <b>rpoC</b>      | *                  | SSA_0177                                | SP_1960                  | DNA-directed RNA polymerase subunit beta'                                                 |
| M5005_Spy_0085  | <a href="#">3572825</a> | NE      | Spy49_0089    | <a href="#">6984723</a> | NE      | -                | *                  |                                         |                          | DNA binding protein                                                                       |
| M5005_Spy_0086  | <a href="#">3572826</a> | NE      | Spy49_0090    | <a href="#">6984724</a> | NE      | comYA            | *                  |                                         |                          | competence protein ComG                                                                   |
| M5005_Spy_0087  | <a href="#">3572827</a> | NE      | Spy49_0091    | <a href="#">6984725</a> | NE      | comYB            | *                  |                                         |                          | competence protein ComG                                                                   |
| M5005_Spy_0088  | <a href="#">3572828</a> | NE      | Spy49_0092    | <a href="#">6984726</a> | NE      | comYC            | *                  |                                         |                          | competence protein ComG                                                                   |
| M5005_Spy_0089  | <a href="#">3572829</a> | NE      | Spy49_0093    | <a href="#">6984727</a> | NE      | -                | *                  |                                         |                          | competence protein ComG                                                                   |
| M5005_Spy_0090  | <a href="#">3572830</a> | NE      | Spy49_0094    | <a href="#">6984728</a> | NE      | -                | *                  |                                         |                          | hypothetical protein M5005_Spy_0090                                                       |
| M5005_Spy_0091  | <a href="#">3572831</a> | NE      | Spy49_0095    | <a href="#">6984729</a> | NE      | comYD            | *                  |                                         |                          | competence protein ComG                                                                   |
| M5005_Spy_0092  | <a href="#">3572832</a> | NE      | Spy49_0096    | <a href="#">6984730</a> | NE      | -                | *                  |                                         |                          | competence protein ComG                                                                   |

|                 |                         |    |             |                         |    |          |   |          |                                                                      |
|-----------------|-------------------------|----|-------------|-------------------------|----|----------|---|----------|----------------------------------------------------------------------|
| M5005_Spy_0093  | <a href="#">3572833</a> | NE | Spy49_0097  | <a href="#">6984731</a> | NE | -        | * |          | adenine-specific methyltransferase                                   |
| M5005_Spy_0094  | <a href="#">3572834</a> | NE | Spy49_0098  | <a href="#">6984732</a> | NC | ackA     | * |          | acetate kinase                                                       |
| M5005_Spy_0095  | <a href="#">3572835</a> | NE | Spy49_0099  | <a href="#">6984733</a> | NE | -        | * |          | hypothetical protein M5005_Spy_0095                                  |
| M5005_Spy_0096c | <a href="#">3572836</a> | NE | Spy49_0100  | <a href="#">6984734</a> | NE | proC     | * |          | pyrroline-5-carboxylate reductase                                    |
| M5005_Spy_0097c | <a href="#">3572837</a> | NE | Spy49_0101  | <a href="#">6984735</a> | NE | pepA     | * |          | glutamyl aminopeptidase                                              |
| M5005_Spy_0098  | <a href="#">3572838</a> | NC | Spy49_0103  | <a href="#">6984736</a> | NE | -        | * |          | hypothetical protein M5005_Spy_0098                                  |
| M5005_Spy_0099  | <a href="#">3572800</a> | NE | -           | -                       | -  | -        | * |          | hypothetical protein M5005_Spy_0099                                  |
| M5005_Spy_0100  | <a href="#">3572801</a> | NE | Spy49_0104  | <a href="#">6984737</a> | NE | trx.1    | * |          | thioredoxin                                                          |
| M5005_Spy_0101  | <a href="#">3572802</a> | NE | Spy49_0105  | <a href="#">6984738</a> | NE | -        | * |          | tRNA-binding domain-containing protein                               |
| M5005_Spy_0102  | <a href="#">3572803</a> | NE | Spy49_0107  | <a href="#">6984739</a> | NE | ssb      | * |          | single-stranded DNA-binding protein                                  |
| M5005_Spy_0103c | <a href="#">3572804</a> | NE | Spy49_0108c | <a href="#">6984740</a> | NE | -        | * |          | deoxyadenosine kinase/deoxyguanosine kinase                          |
| M5005_Spy_0104c | <a href="#">3572805</a> | NE | Spy49_0109c | <a href="#">6984741</a> | NE | -        | * |          | tRNA-dihydrouridine synthase                                         |
| M5005_Spy_0105c | <a href="#">3572806</a> | NE | Spy49_0110c | <a href="#">6984742</a> | NE | hsiO     | * |          | heat shock protein 33                                                |
| M5005_Spy_0106c | <a href="#">3572807</a> | NE | Spy49_0111  | <a href="#">6984823</a> | NE | rofA/nra | * |          | transcriptional regulator                                            |
| M5005_Spy_0107  | <a href="#">3572808</a> | NE | Spy49_0112  | <a href="#">6984824</a> | NE | cbp      | * |          | fibronectin-binding protein                                          |
| M5005_Spy_0108  | <a href="#">3572809</a> | NE | Spy49_0113  | <a href="#">6984825</a> | NE | lepA-1   | * |          | signal peptidase I                                                   |
| M5005_Spy_0109  | <a href="#">3572810</a> | NE | Spy49_0114  | <a href="#">6984826</a> | NE | prtF     | * |          | fibronectin-binding protein                                          |
| M5005_Spy_0110  | <a href="#">3572811</a> | NE | Spy49_0116  | <a href="#">6984827</a> | NE | eftLSL.B | * |          | hypothetical protein M5005_Spy_0110                                  |
| M5005_Spy_0111  | <a href="#">3572812</a> | NE | Spy49_0117  | <a href="#">6984828</a> | NE | -        | * |          | hypothetical protein M5005_Spy_0111                                  |
| M5005_Spy_0112c | <a href="#">3572813</a> | NE | -           | -                       | -  | -        | * |          | transposase                                                          |
| M5005_Spy_0113c | <a href="#">3572814</a> | NE | -           | -                       | -  | -        | * |          | transposase                                                          |
| M5005_Spy_0114  | <a href="#">3572815</a> | NE | -           | -                       | -  | -        | * |          | sortase                                                              |
|                 |                         |    | Spy49_0118  | <a href="#">6984829</a> | NE | msmR     | * |          |                                                                      |
|                 |                         |    | Spy49_0119  | <a href="#">6984830</a> | NE | prtF     | * |          |                                                                      |
|                 |                         |    | Spy49_0120c | <a href="#">6984831</a> | NE | -        | * |          |                                                                      |
| M5005_Spy_0115c | <a href="#">3572816</a> | NE | -           | -                       | -  | -        | * |          | hypothetical protein M5005_Spy_0115                                  |
| M5005_Spy_0116  | <a href="#">3572817</a> | NE | Spy49_0121  | <a href="#">6984832</a> | NE | atoE     | * |          | short-chain fatty acids transporter                                  |
| M5005_Spy_0117c | <a href="#">3572818</a> | NE | -           | -                       | -  | -        | * |          | LysR family transcriptional regulator                                |
| M5005_Spy_0118c | <a href="#">3572780</a> | NE | Spy49_0122c | <a href="#">6984833</a> | NE | -        | * |          | LysR family transcriptional regulator                                |
| M5005_Spy_0119  | <a href="#">3572781</a> | NE | Spy49_0123  | <a href="#">6984834</a> | NE | -        | * |          | acetyl-CoA acetyltransferase                                         |
| M5005_Spy_0120  | <a href="#">3572782</a> | NE | Spy49_0124  | <a href="#">6984835</a> | NE | atoD.2   | * |          | acetate CoA-transferase subunit alpha                                |
| M5005_Spy_0121  | <a href="#">3572783</a> | NE | Spy49_0125  | <a href="#">6984836</a> | NE | -        | * |          | acetyl-CoA:acetoacetyl-CoA transferase subunit beta                  |
| M5005_Spy_0122c | <a href="#">3572784</a> | NE | Spy49_0126c | <a href="#">6984837</a> | NE | -        | * |          | DNA-binding protein                                                  |
| M5005_Spy_0123  | <a href="#">3572785</a> | NE | Spy49_0127  | <a href="#">6984838</a> | NE | -        | * |          | translation initiation inhibitor                                     |
| M5005_Spy_0124  | <a href="#">3572786</a> | NE | Spy49_0128  | <a href="#">6984839</a> | NE | sloR     | * |          | transcriptional regulator                                            |
| M5005_Spy_0125  | <a href="#">3572787</a> | NE | Spy49_0129  | <a href="#">6984840</a> | NE | -        | * |          | hypothetical protein M5005_Spy_0125                                  |
| M5005_Spy_0126  | <a href="#">3572788</a> | NE | Spy49_0130  | <a href="#">6984841</a> | NE | ntpI     | * |          | V-type ATP synthase subunit I                                        |
| M5005_Spy_0127  | <a href="#">3572789</a> | NE | Spy49_0131  | <a href="#">6984842</a> | NE | ntpK     | * |          | V-type ATP synthase subunit K                                        |
| M5005_Spy_0128  | <a href="#">3572790</a> | NE | Spy49_0132  | <a href="#">6984843</a> | NE | ntpE     | * |          | V-type sodium ATP synthase subunit E                                 |
| M5005_Spy_0129  | <a href="#">3572791</a> | NE | Spy49_0133  | <a href="#">6984844</a> | NE | ntpC     | * |          | V-type ATP synthase subunit C                                        |
| M5005_Spy_0130  | <a href="#">3572792</a> | NE | Spy49_0134  | <a href="#">6984845</a> | NE | ntpF     | * |          | V-type ATP synthase subunit F                                        |
| M5005_Spy_0131  | <a href="#">3572793</a> | NE | Spy49_0135  | <a href="#">6984846</a> | NE | ntpA     | * |          | V-type ATP synthase subunit A                                        |
| M5005_Spy_0132  | <a href="#">3572794</a> | NE | Spy49_0136  | <a href="#">6984847</a> | NE | ntpB     | * |          | V-type ATP synthase subunit B                                        |
| M5005_Spy_0133  | <a href="#">3572795</a> | NE | Spy49_0137  | <a href="#">6984848</a> | NE | ntpD     | * |          | V-type ATP synthase subunit D                                        |
| M5005_Spy_0134c | <a href="#">3572796</a> | NE | Spy49_0138c | <a href="#">6984849</a> | NE | -        | * |          | tellurite resistance protein                                         |
| M5005_Spy_0135c | <a href="#">3572797</a> | NE | Spy49_0139c | <a href="#">6984850</a> | NE | -        | * |          | hypothetical protein M5005_Spy_0135                                  |
| M5005_Spy_0136  | <a href="#">3572798</a> | NE | Spy49_0141  | <a href="#">6984851</a> | NE | purA     | * |          | adenylosuccinate synthetase                                          |
| M5005_Spy_0137  | <a href="#">3572799</a> | NE | Spy49_0142  | <a href="#">6984852</a> | NE | -        | * |          | nucleoside-binding protein                                           |
| M5005_Spy_0138  | <a href="#">3572761</a> | C  | Spy49_0143  | <a href="#">6984853</a> | NC | nusG     | * | SP_2007  | transcription antitermination protein NusG                           |
| M5005_Spy_0139  | <a href="#">3572762</a> | NE | Spy49_0144  | <a href="#">6984854</a> | NE | nga      | * |          | NAD glycohydrolase                                                   |
| M5005_Spy_0140  | <a href="#">3572763</a> | NE | Spy49_0145  | <a href="#">6984855</a> | NE | -        | * |          | hypothetical protein M5005_Spy_0140                                  |
| M5005_Spy_0141  | <a href="#">3572764</a> | NE | Spy49_0146  | <a href="#">6984856</a> | NE | slo      | * |          | streptolysin O                                                       |
| M5005_Spy_0142  | <a href="#">3572765</a> | NE | Spy49_0147  | <a href="#">6984857</a> | NC | -        | * |          | hypothetical protein M5005_Spy_0142                                  |
| M5005_Spy_0143c | <a href="#">3572766</a> | NE | Spy49_0148  | <a href="#">6984858</a> | NC | -        | * |          | hypothetical protein M5005_Spy_0143                                  |
| M5005_Spy_0144c | <a href="#">3572767</a> | NC | Spy49_0149c | <a href="#">6984859</a> | NE | -        | * |          | hypothetical protein M5005_Spy_0144                                  |
| M5005_Spy_0145c | <a href="#">3572768</a> | NE | Spy49_0150c | <a href="#">6984860</a> | E  | -        | * |          | hypothetical protein M5005_Spy_0145                                  |
| M5005_Spy_0146  | <a href="#">3572769</a> | NE | Spy49_0151  | <a href="#">6984861</a> | NE | metB     | * |          | cystathionine beta-lyase                                             |
| M5005_Spy_0147  | <a href="#">3572770</a> | E  | Spy49_0152  | <a href="#">6984862</a> | E  | leuS     | * | SSA_0289 | leucyl-tRNA synthetase                                               |
| M5005_Spy_0148  | <a href="#">3572771</a> | NC | Spy49_0153  | <a href="#">6984863</a> | NE | ulaA     | * | SP_0254  | PTS system ascorbate-specific transporter subunit IIC                |
| M5005_Spy_0149  | <a href="#">3572772</a> | NE | Spy49_0154  | <a href="#">6984864</a> | NE | -        | * |          | PTS system 3-keto-L-gulonate specific transporter subunit IIB        |
| M5005_Spy_0150  | <a href="#">3572773</a> | NE | Spy49_0155  | <a href="#">6984865</a> | NE | -        | * |          | PTS system 3-keto-L-gulonate specific transporter subunit IIA        |
| M5005_Spy_0151  | <a href="#">3572774</a> | NE | Spy49_0156  | <a href="#">6984866</a> | NC | ulaD     | * |          | 3-keto-L-gulonate-6-phosphate decarboxylase                          |
| M5005_Spy_0152  | <a href="#">3572775</a> | NE | Spy49_0157  | <a href="#">6984867</a> | NE | -        | * |          | L-xylulose 5-phosphate 3-epimerase                                   |
| M5005_Spy_0153  | <a href="#">3572776</a> | NE | Spy49_0158  | <a href="#">6984868</a> | NE | araD     | * |          | L-ribulose-5-phosphate 4-epimerase                                   |
| M5005_Spy_0154  | <a href="#">3572777</a> | NC | -           | -                       | -  | -        | * |          | hypothetical protein M5005_Spy_0154                                  |
| M5005_Spy_0155  | <a href="#">3572778</a> | NE | Spy49_0159  | <a href="#">6984869</a> | NE | -        | * |          | BigG family transcription antiterminator                             |
| M5005_Spy_0156  | <a href="#">3572779</a> | NE | Spy49_0160  | <a href="#">6984870</a> | NE | -        | * |          | L-ascorbate 6-phosphate lactonase                                    |
| M5005_Spy_0157  | <a href="#">3572741</a> | NE | Spy49_0161  | <a href="#">6984871</a> | NE | opuAA    | * |          | glycine betaine transport ATP-binding protein                        |
| M5005_Spy_0158  | <a href="#">3572742</a> | NE | Spy49_0162  | <a href="#">6984872</a> | NE | opuABC   | * |          | glycine betaine-binding protein/glycine betaine transporter permease |
| M5005_Spy_0159  | <a href="#">3572743</a> | E  | Spy49_0163  | <a href="#">6984873</a> | E  | polA     | * | SSA_0100 | DNA polymerase I                                                     |
| M5005_Spy_0160  | <a href="#">3572744</a> | NE | Spy49_0164  | <a href="#">6984874</a> | NE | -        | * | SP_0032  | CoA binding protein                                                  |
| M5005_Spy_0161  | <a href="#">3572745</a> | NE | Spy49_0165  | <a href="#">6984875</a> | NE | perR     | * |          | ferric uptake regulation protein                                     |
| M5005_Spy_0162  | <a href="#">3572746</a> | NE | Spy49_0166  | <a href="#">6984876</a> | NE | vlg      | * |          | trans-acting positive regulator Mry                                  |
| M5005_Spy_0163  | <a href="#">3572747</a> | NE | Spy49_0167  | <a href="#">6984877</a> | NE | -        | * |          | 3'-phosphoadenosine 5'-phosphosulfate sulfotransferase               |
| M5005_Spy_0164  | <a href="#">3572748</a> | NE | Spy49_0168  | <a href="#">6984878</a> | NE | -        | * |          | parB-like nuclease                                                   |
| M5005_Spy_0165c | <a href="#">3572749</a> | NE | Spy49_0169  | <a href="#">6984879</a> | NE | -        | * |          | transposase                                                          |
| M5005_Spy_0166c | <a href="#">3572750</a> | NE | Spy49_0170c | <a href="#">6984880</a> | NE | -        | * |          | transposase                                                          |
| M5005_Spy_0167c | <a href="#">3572751</a> | NE | -           | -                       | -  | -        | * |          | transposase                                                          |
| M5005_Spy_0168c | <a href="#">3572752</a> | NE | Spy49_0173c | <a href="#">6984881</a> | NE | -        | * |          | transposase                                                          |
| M5005_Spy_0169c | <a href="#">3572753</a> | NE | -           | -                       | -  | -        | * |          | malonate permease                                                    |
| M5005_Spy_0170  | <a href="#">3572754</a> | NE | Spy49_0176  | <a href="#">6984883</a> | NE | nadC     | * |          | nicotinate-nucleotide pyrophosphorylase                              |
| M5005_Spy_0171c | <a href="#">3572755</a> | NE | Spy49_0178c | <a href="#">6984884</a> | NE | -        | * |          | transposase                                                          |
| M5005_Spy_0172c | <a href="#">3572756</a> | NE | -           | -                       | -  | -        | * |          | transposase                                                          |
| M5005_Spy_0173c | <a href="#">3572757</a> | NE | Spy49_0180c | <a href="#">6984885</a> | NE | -        | * |          | hypothetical protein M5005_Spy_0173                                  |
| M5005_Spy_0174  | <a href="#">3572758</a> | NC | -           | -                       | -  | -        | * |          | hypothetical protein M5005_Spy_0174                                  |
| M5005_Spy_0175  | <a href="#">3572759</a> | NE | Spy49_0181  | <a href="#">6984886</a> | NE | tgt      | * |          | queuine tRNA-ribosyltransferase                                      |
| M5005_Spy_0176  | <a href="#">3572760</a> | NE | Spy49_0182  | <a href="#">6984887</a> | NE | -        | * |          | hypothetical protein M5005_Spy_0176                                  |
| M5005_Spy_0177  | <a href="#">3572722</a> | NE | Spy49_0183  | <a href="#">6984888</a> | NE | bioY     | * |          | bioY protein                                                         |
| M5005_Spy_0178  | <a href="#">3572723</a> | NE | Spy49_0184  | <a href="#">6984889</a> | NE | -        | * |          | metal-dependent hydrolase                                            |
| M5005_Spy_0179  | <a href="#">3572724</a> | NE | Spy49_0185  | <a href="#">6984890</a> | NE | -        | * |          | tRNA-specific adenosine deaminase                                    |
| M5005_Spy_0180c | <a href="#">3572725</a> | NE | Spy49_0186c | <a href="#">6984891</a> | NE | -        | * |          | S-layer protein                                                      |
| M5005_Spy_0181  | <a href="#">3572726</a> | NC | -           | -                       | -  | -        | * |          | hypothetical protein M5005_Spy_0181                                  |
| M5005_Spy_0182  | <a href="#">3572727</a> | NE | Spy49_0187  | <a href="#">6984892</a> | NE | speG     | * |          | exotoxin type G                                                      |
| M5005_Spy_0183  | <a href="#">3572728</a> | NC | -           | -                       | -  | -        | * |          | hypothetical protein M5005_Spy_0183                                  |
| M5005_Spy_0184  | <a href="#">3572729</a> | NC | -           | -                       | -  | -        | * |          | hypothetical protein M5005_Spy_0184                                  |
| M5005_Spy_0185  | <a href="#">3572730</a> | E  | Spy49_0188  | <a href="#">6984893</a> | E  | pgi      | * | SSA_2183 | glucose-6-phosphate isomerase                                        |
| M5005_Spy_0186c | <a href="#">3572731</a> | NE | Spy49_0189c | <a href="#">6984894</a> | NE | ralp4    | * | SP_2070  | transcriptional regulator                                            |
| M5005_Spy_0187  | <a href="#">3572732</a> | NE | -           | -                       | -  | -        | * |          | transposase                                                          |
| M5005_Spy_0188  | <a href="#">3572733</a> | NE | -           | -                       | -  | -        | * |          | transposase                                                          |
| M5005_Spy_0189  | <a href="#">3572734</a> | NC | -           | -                       | -  | -        | * |          | hypothetical protein M5005_Spy_0189                                  |
| M5005_Spy_0190  | <a href="#">3572735</a> | NC | -           | -                       | -  | -        | * |          | hypothetical protein M5005_Spy_0190                                  |
| M5005_Spy_0191  | <a href="#">3572736</a> | NE | Spy49_0190  | <a href="#">6984895</a> | NE | -        | * |          | rhomboid family integral membrane protein                            |



|                 |         |    |             |         |         |           |   |          |         |                                                                    |
|-----------------|---------|----|-------------|---------|---------|-----------|---|----------|---------|--------------------------------------------------------------------|
| M5005_Spy_0192c | 3572737 | NC | Spy49_0191c | 6984896 | E       | hasC.2    | * | SSA_2169 | SP_2092 | UTP-glucose-1-phosphate uridylyltransferase                        |
| M5005_Spy_0194c | 3572739 | E  | Spy49_0192c | 6984897 | E       | gpsA      | * |          | SP_2091 | glycerol-3-phosphate dehydrogenase, partial                        |
| M5005_Spy_0195  | 3572740 | NE | Spy49_0193  | 6984898 | NE      | -         | * |          |         | MarR family transcriptional regulator                              |
| M5005_Spy_0196  | 3572702 | NE | Spy49_0194  | 6984899 | NC      | -         | * |          |         | multidrug resistance ABC transporter ATP-binding protein/permease  |
| M5005_Spy_0197  | 3572703 | NE | Spy49_0195  | 6984900 | NE      | -         | * |          |         | multidrug resistance ABC transporter ATP-binding protein/permease  |
| M5005_Spy_0198  | 3572704 | NE | Spy49_0198  | 6984901 | NE      | -         | * |          |         | hypothetical protein M5005_Spy_0198                                |
| M5005_Spy_0199  | 3572705 | NE | Spy49_0199  | 6984902 | NE      | dut       | * |          |         | deoxyuridine 5'-triphosphate nucleotidohydrolase                   |
| M5005_Spy_0200  | 3572706 | NE | Spy49_0200  | 6984983 | NE      | radA      | * |          |         | DNA repair protein RadA                                            |
| M5005_Spy_0201  | 3572707 | C  | Spy49_0201  | 6984984 | NC      | -         | * |          |         | carbonic anhydrase                                                 |
| M5005_Spy_0202  | 3572708 | NE | Spy49_0202  | 6984985 | NE      | -         | * |          |         | hypothetical protein M5005_Spy_0202                                |
| M5005_Spy_0203  | 3572709 | E  | Spy49_0203  | 6984986 | E       | glx       | * | SSA_2144 | SP_2069 | glutamyl-tRNA synthetase                                           |
| M5005_Spy_0204  | 3572710 | NE | Spy49_0204  | 6984987 | NE      | fasB      | * |          |         | sensory transduction protein kinase                                |
| M5005_Spy_0205  | 3572711 | NE | Spy49_0205  | 6984988 | NC      | fasC      | * |          |         | sensory transduction protein kinase                                |
| M5005_Spy_0206  | 3572712 | NE | Spy49_0206  | 6984989 | NE      | fasA      | * |          |         | response regulator                                                 |
| M5005_Spy_0207  | 3572713 | C  | Spy49_0207  | 6984990 | NC      | rmpA      | * | SSA_2140 | SP_2042 | ribonuclease P                                                     |
| M5005_Spy_0208  | 3572714 | NE | Spy49_0208  | 6984991 | NE      | -         | * |          |         | hypothetical protein M5005_Spy_0208                                |
| M5005_Spy_0209  | 3572715 | NE | Spy49_0209  | 6984992 | NC      | -         | * |          |         | jag protein                                                        |
| M5005_Spy_0210  | 3572716 | NC | -           | -       | -       | -         | * |          |         | hypothetical protein M5005_Spy_0210                                |
| M5005_Spy_0211  | 3572717 | NC | Spy49_0210  | 6984993 | NC      | rpmH      | * |          |         | 50S ribosomal protein L34                                          |
| M5005_Spy_0212  | 3572718 | NE | Spy49_0211  | 6984994 | NE      | -         | * |          |         | N-acetylmannosamine-6-phosphate 2-epimerase                        |
| M5005_Spy_0213  | 3572719 | NE | Spy49_0212  | 6984995 | NE      | -         | * |          |         | N-acetylneuraminate-binding protein                                |
| M5005_Spy_0214  | 3572720 | NE | Spy49_0213  | 6984996 | NE      | -         | * |          |         | N-acetylneuraminate transporter permease                           |
| M5005_Spy_0215  | 3572721 | NE | Spy49_0214  | 6984997 | NE      | -         | * |          |         | N-acetylneuraminate transporter permease                           |
| M5005_Spy_0216  | 3572683 | NE | Spy49_0215  | 6984998 | NE      | -         | * |          |         | hypothetical protein M5005_Spy_0216                                |
| M5005_Spy_0217  | 3572684 | NE | Spy49_0216  | 6984999 | NE      | nanH      | * |          |         | N-acetylneuraminate lyase                                          |
| M5005_Spy_0218  | 3572685 | NE | Spy49_0217  | 6985000 | NE      | -         | * |          |         | N-acetylmannosamine kinase                                         |
| M5005_Spy_0219c | 3572686 | NE | Spy49_0218c | 6985001 | NE      | -         | * |          |         | RpiR family transcriptional regulator                              |
| M5005_Spy_0220  | 3572687 | NE | Spy49_0219  | 6985002 | NE      | tatD      | * |          |         | sec-independent protein translocase                                |
| M5005_Spy_0221  | 3572688 | NE | Spy49_0220  | 6985003 | NE      | -         | * |          |         | ribonuclease M5                                                    |
| M5005_Spy_0222  | 3572689 | NE | Spy49_0221  | 6985004 | NE      | ksgA      | * |          |         | dimethyladenosine transferase                                      |
| M5005_Spy_0223  | 3572690 | E  | Spy49_0223  | 6985005 | NE      | engC      | * |          | SP_1984 | ribosome-associated GTPase                                         |
| M5005_Spy_0224  | 3572691 | C  | Spy49_0224  | 6985006 | NC      | rpe       | * |          |         | ribulose-phosphate 3-epimerase                                     |
| M5005_Spy_0225  | 3572692 | NE | Spy49_0225  | 6985007 | NE      | -         | * |          |         | thiamin pyrophosphokinase                                          |
| M5005_Spy_0226  | 3572693 | NE | Spy49_0226  | 6985008 | NE      | -         | * |          |         | rnuC family protein                                                |
| M5005_Spy_0227  | 3572694 | NE | Spy49_0227  | 6985009 | NE      | cbf       | * |          |         | CMP-binding factor                                                 |
| M5005_Spy_0228  | 3572695 | NE | Spy49_0228  | 6985010 | NE      | purR      | * |          |         | pur operon repressor                                               |
| M5005_Spy_0229  | 3572696 | NE | Spy49_0229  | 6985011 | NE      | prgA      | * |          |         | surface exclusion protein                                          |
| M5005_Spy_0230  | 3572697 | E  | Spy49_0230  | 6985012 | NC      | rpsL      | * | SSA_2111 | SP_0271 | 30S ribosomal protein S12                                          |
| M5005_Spy_0231  | 3572698 | E  | Spy49_0231  | 6985013 | E       | rpsG      | * | SSA_2110 | SP_0272 | 30S ribosomal protein S7                                           |
| M5005_Spy_0232  | 3572699 | E  | Spy49_0232  | 6985014 | E       | fus       | * | SSA_2109 | SP_0273 | elongation factor G                                                |
| M5005_Spy_0233  | 3572700 | E  | Spy49_0234  | 6985015 | E       | plr       | * | SSA_2108 | SP_2012 | glyceraldehyde-3-phosphate dehydrogenase                           |
| M5005_Spy_0234c | 3572701 | NC | Spy49_0235c | 6985016 | NC      | -         | * |          |         | hypothetical protein M5005_Spy_0234                                |
| M5005_Spy_0235c | 3572663 | E  | Spy49_0236c | 6985017 | NE      | -         | * |          | SP_1460 | amino acid transport ATP-binding protein                           |
| M5005_Spy_0236c | 3572664 | E  | Spy49_0237c | 6985018 | NE      | -         | * |          | SP_1461 | amino acid ABC transporter permease                                |
| M5005_Spy_0237  | 3572665 | NE | Spy49_0238  | 6985019 | NE      | -         | * |          |         | hypothetical protein M5005_Spy_0237                                |
| M5005_Spy_0238  | 3572666 | NE | Spy49_0239  | 6985020 | NE      | uppP/bacA | * |          |         | undecaprenyl pyrophosphate phosphatase                             |
| M5005_Spy_0239  | 3572667 | NE | Spy49_0240  | 6985021 | NE      | mecA      | * |          |         | adaptor protein                                                    |
| M5005_Spy_0240  | 3572668 | E  | Spy49_0241  | 6985022 | E       | rgpG      | * | SSA_1870 | SP_0337 | undecaprenyl-phosphate alpha-N-acetylglucosaminophosphotransferase |
| M5005_Spy_0241  | 3572669 | NC | -           | -       | -       | -         | * |          |         | hypothetical protein M5005_Spy_0241                                |
| M5005_Spy_0242  | 3572670 | C  | Spy49_0242  | 6985023 | NC      | -         | * |          | SP_1541 | ABC transporter ATP-binding protein                                |
| M5005_Spy_0243  | 3572671 | C  | Spy49_0243  | 6985024 | C       | -         | * |          | SP_0868 | ABC transporter                                                    |
| M5005_Spy_0244  | 3572672 | C  | Spy49_0244  | 6985025 | NC      | nifS3     | * |          | SP_0869 | cysteine desulfhydrase                                             |
| M5005_Spy_0245  | 3572673 | C  | Spy49_0245  | 6985026 | NC      | nifU      | * |          | SP_0870 | IscU protein                                                       |
| M5005_Spy_0246  | 3572674 | C  | Spy49_0246  | 6985027 | NC      | -         | * |          | SP_0871 | ABC transporter                                                    |
| M5005_Spy_0247c | 3572675 | NE | Spy49_0247  | 6985028 | NE      | pbp7      | * |          |         | D-alanyl-D-alanine carboxypeptidase                                |
| M5005_Spy_0248c | 3572676 | NE | Spy49_0248c | 6985029 | NE      | dacA2     | * |          |         | D-alanyl-D-alanine carboxypeptidase                                |
| M5005_Spy_0249  | 3572677 | NE | Spy49_0249  | 6985030 | NE      | oppA      | * |          |         | oligopeptide-binding protein                                       |
| M5005_Spy_0250  | 3572678 | NE | Spy49_0250  | 6985031 | NE      | oppB      | * |          |         | oligopeptide transporter permease                                  |
| M5005_Spy_0251  | 3572679 | NE | Spy49_0251  | 6985032 | NE      | oppC      | * |          |         | oligopeptide transporter permease                                  |
| M5005_Spy_0252  | 3572680 | NE | Spy49_0252  | 6985033 | NE      | oppD      | * |          |         | oligopeptide transport ATP-binding protein                         |
| M5005_Spy_0253  | 3572681 | NE | Spy49_0253  | 6985034 | NE      | oppF      | * |          |         | oligopeptide transport ATP-binding protein                         |
| M5005_Spy_0254c | 3572682 | NC | Spy49_0254c | 6985035 | NE      | -         | * |          |         | transposase                                                        |
| M5005_Spy_0255c | 3572650 | NC | Spy49_0256  | 6985042 | NE      | -         | * |          |         | hypothetical protein M5005_Spy_0255                                |
| M5005_Spy_0256  | 3572657 | NE | -           | -       | comX1.1 | -         | * |          |         | competence-specific sigma factor                                   |
| M5005_Spy_0257  | 3572658 | NE | -           | -       | -       | -         | * |          |         | transposase, partial                                               |
| M5005_Spy_0258  | 3572659 | NE | -           | -       | -       | -         | * |          |         | transposase                                                        |
| M5005_Spy_0259  | 3572660 | NC | -           | -       | -       | -         | * |          |         | hypothetical protein M5005_Spy_0259                                |
| M5005_Spy_0260  | 3572661 | E  | Spy49_0257  | 6985043 | C       | -         | * | SSA_0575 | SP_1750 | lipase                                                             |
| M5005_Spy_0261  | 3572662 | C  | Spy49_0258  | 6985044 | E       | -         | * | SSA_1189 | SP_1749 | GTP-binding protein YqeH                                           |
| M5005_Spy_0262  | 3572630 | NE | Spy49_0259  | 6985045 | NE      | -         | * |          |         | RNA-binding protein                                                |
| M5005_Spy_0263  | 3572631 | E  | Spy49_0260  | 6985046 | NC      | nadD      | * |          |         | nicotinic acid mononucleotide adenyltransferase                    |
| M5005_Spy_0264  | 3572632 | NE | Spy49_0261  | 6985047 | NE      | -         | * |          |         | HAD superfamily hydrolase                                          |
| M5005_Spy_0265  | 3572633 | NE | Spy49_0262  | 6985048 | NE      | -         | * |          |         | iojap superfamily protein                                          |
| M5005_Spy_0266  | 3572634 | NE | Spy49_0263  | 6985049 | NE      | -         | * |          |         | methyltransferase                                                  |
| M5005_Spy_0267  | 3572635 | NE | Spy49_0264  | 6985050 | NE      | -         | * |          |         | hypothetical protein M5005_Spy_0267                                |
| M5005_Spy_0268  | 3572636 | NC | -           | -       | -       | -         | * |          |         | hypothetical protein M5005_Spy_0268                                |
| M5005_Spy_0269  | 3572637 | NE | Spy49_0265  | 6985051 | NE      | -         | * |          |         | hypothetical protein M5005_Spy_0269                                |
| M5005_Spy_0270  | 3572638 | NE | Spy49_0266  | 6985052 | NC      | atmA      | * |          |         | ABC transporter substrate-binding protein                          |
| M5005_Spy_0271  | 3572639 | NE | Spy49_0268  | 6985053 | NE      | atmB      | * |          |         | ABC transporter substrate-binding protein                          |
| M5005_Spy_0272  | 3572640 | NE | Spy49_0269  | 6985054 | NE      | atmD      | * |          |         | ABC transporter ATP-binding protein                                |
| M5005_Spy_0273  | 3572641 | NE | Spy49_0270  | 6985055 | NE      | atmE      | * |          |         | ABC transporter permease                                           |
| M5005_Spy_0274c | 3572642 | NE | Spy49_0271c | 6985056 | NE      | braB      | * |          |         | branched-chain amino acid transporter carrier protein              |
| M5005_Spy_0275  | 3572643 | NE | Spy49_0272  | 6985057 | NE      | -         | * |          |         | serine/threonine transporter SstT                                  |
| M5005_Spy_0276c | 3572644 | C  | Spy49_0273c | 6985058 | E       | -         | * |          |         | potassium uptake protein                                           |
| M5005_Spy_0277c | 3572645 | NE | Spy49_0274c | 6985059 | E       | -         | * |          |         | potassium uptake protein                                           |
| M5005_Spy_0278c | 3572646 | NE | Spy49_0275  | 6985060 | NE      | gidB      | * |          |         | 16S rRNA methyltransferase GidB                                    |
| M5005_Spy_0279  | 3572647 | NE | Spy49_0276  | 6985061 | NE      | lemA      | * |          |         | hypothetical protein M5005_Spy_0279                                |
| M5005_Spy_0280  | 3572648 | NE | Spy49_0277  | 6985062 | NE      | htpX      | * |          |         | heat shock protein HtpX                                            |
| M5005_Spy_0281  | 3572649 | NE | Spy49_0278  | 6985143 | NE      | -         | * |          |         | hypothetical protein M5005_Spy_0281                                |
| M5005_Spy_0282  | 3572611 | NE | Spy49_0279  | 6985144 | NC      | covR      | * |          |         | response regulator                                                 |
| M5005_Spy_0283  | 3572612 | NE | Spy49_0280  | 6985145 | E       | covS      | * |          |         | transmembrane histidine kinase                                     |
| M5005_Spy_0284  | 3572613 | NE | Spy49_0281  | 6985146 | C       | ndrR      | * |          | SP_1713 | NdrR family transcriptional regulator                              |
| M5005_Spy_0285  | 3572614 | E  | Spy49_0282  | 6985147 | E       | dnaB      | * | SSA_1806 | SP_1712 | replicative DNA helicase                                           |
| M5005_Spy_0286  | 3572615 | E  | Spy49_0283  | 6985148 | E       | dnaI      | * | SSA_1805 | SP_1711 | primosomal protein DnaI                                            |
| M5005_Spy_0287  | 3572616 | E  | Spy49_0284  | 6985149 | E       | engA      | * | SSA_1803 | SP_1709 | GTP-binding protein EngA                                           |
| M5005_Spy_0288  | 3572617 | NE | Spy49_0285  | 6985150 | NC      | snf       | * |          |         | SWF/SNF family helicase                                            |
| M5005_Spy_0289  | 3572618 | NE | Spy49_0286  | 6985151 | NE      | -         | * |          |         | hypothetical protein M5005_Spy_0289                                |
| M5005_Spy_0290  | 3572619 | E  | Spy49_0287  | 6985152 | E       | murC      | * | SSA_1800 | SP_1521 | UDP-N-acetylmuramate--L-alanine ligase                             |
| M5005_Spy_0291  | 3572620 | NE | Spy49_0288  | 6985153 | NE      | -         | * |          |         | acetyltransferase                                                  |
| M5005_Spy_0292  | 3572621 | C  | Spy49_0289  | 6985154 | NC      | -         | * |          | SP_1518 | aminodeoxychorismate lyase                                         |
| M5005_Spy_0293  | 3572622 | NE | Spy49_0290  | 6985155 | NC      | greA      | * |          |         | transcription elongation factor GreA                               |
| M5005_Spy_0294c | 3572623 | NC | -           | -       | -       | -         | * |          |         | transposase                                                        |

|                 |                         |    |             |                         |    |             |   |          |         |                                                                                                            |
|-----------------|-------------------------|----|-------------|-------------------------|----|-------------|---|----------|---------|------------------------------------------------------------------------------------------------------------|
| M5005_Spy_0295c | <a href="#">3572624</a> | E  | Spy49_0291  | <a href="#">6985156</a> | E  | <b>oxaA</b> | * |          | SP_1975 | OxaA-like protein precursor                                                                                |
| M5005_Spy_0296c | <a href="#">3572625</a> | NE | Spy49_0292c | <a href="#">6985157</a> | NE | -           | * |          |         | acylphosphatase                                                                                            |
| M5005_Spy_0297c | <a href="#">3572626</a> | NE | -           | -                       | -  | -           | * |          |         | transposase                                                                                                |
| M5005_Spy_0298c | <a href="#">3572627</a> | NE | -           | -                       | -  | -           | * |          |         | transposase                                                                                                |
| M5005_Spy_0299  | <a href="#">3572628</a> | NE | Spy49_0293  | <a href="#">6985158</a> | NE | -           | * |          |         | 23S rRNA methyltransferase                                                                                 |
| M5005_Spy_0300  | <a href="#">3572629</a> | NE | Spy49_0294  | <a href="#">6985159</a> | NE | -           | * |          |         | HAD superfamily hydrolase                                                                                  |
| M5005_Spy_0301  | <a href="#">3572591</a> | NE | Spy49_0295  | <a href="#">6985160</a> | NC | -           | * |          |         | hypothetical protein M5005_Spy_0301                                                                        |
| M5005_Spy_0302  | <a href="#">3572592</a> | C  | Spy49_0296  | <a href="#">6985161</a> | NC | -           | * |          |         | hypothetical protein M5005_Spy_0302                                                                        |
| M5005_Spy_0303  | <a href="#">3572593</a> | E  | Spy49_0297  | <a href="#">6985162</a> | E  | <b>glr</b>  | * | SSA_1784 | SP_1881 | glutamate racemase<br>deoxyribonucleotide triphosphate pyrophosphatase/unknown domain fusion protein       |
| M5005_Spy_0304  | <a href="#">3572594</a> | NE | Spy49_0298  | <a href="#">6985163</a> | NE | -           | * |          |         | phosphoesterase                                                                                            |
| M5005_Spy_0305  | <a href="#">3572595</a> | NE | Spy49_0299  | <a href="#">6985164</a> | NE | -           | * |          |         | phosphoesterase                                                                                            |
| M5005_Spy_0306  | <a href="#">3572596</a> | NE | Spy49_0300  | <a href="#">6985165</a> | NE | -           | * |          |         | hypothetical protein M5005_Spy_0306                                                                        |
| M5005_Spy_0307  | <a href="#">3572597</a> | NE | Spy49_0301  | <a href="#">6985166</a> | NE | xerD        | * |          |         | site-specific tyrosine recombinase XerD                                                                    |
| M5005_Spy_0308  | <a href="#">3572598</a> | NE | Spy49_0302  | <a href="#">6985167</a> | NE | scpA        | * |          |         | segregation and condensation protein A                                                                     |
| M5005_Spy_0309  | <a href="#">3572599</a> | NE | Spy49_0303  | <a href="#">6985168</a> | NE | scpB        | * |          |         | segregation and condensation protein B                                                                     |
| M5005_Spy_0310  | <a href="#">3572600</a> | NE | Spy49_0304  | <a href="#">6985169</a> | NE | riuB        | * |          |         | ribosomal large subunit pseudouridine synthase B                                                           |
| M5005_Spy_0311  | <a href="#">3572601</a> | NE | Spy49_0305  | <a href="#">6985170</a> | NE | -           | * |          |         | hypothetical protein M5005_Spy_0311                                                                        |
| M5005_Spy_0312  | <a href="#">3572602</a> | NE | Spy49_0306  | <a href="#">6985171</a> | NE | -           | * |          |         | 23S rRNA methyltransferase                                                                                 |
| M5005_Spy_0313  | <a href="#">3572603</a> | C  | Spy49_0307  | <a href="#">6985172</a> | NE | -           | * |          |         | riboflavin transporter                                                                                     |
| M5005_Spy_0314  | <a href="#">3572604</a> | NE | Spy49_0308  | <a href="#">6985173</a> | NE | -           | * |          |         | phosphatidylglycerophosphatase B                                                                           |
| M5005_Spy_0315  | <a href="#">3572605</a> | NE | Spy49_0309  | <a href="#">6985174</a> | NE | -           | * |          |         | Fe-S oxidoreductase                                                                                        |
| M5005_Spy_0316  | <a href="#">3572606</a> | NE | Spy49_0310  | <a href="#">6985175</a> | NE | -           | * |          |         | SAM-dependent methyltransferase                                                                            |
| M5005_Spy_0317  | <a href="#">3572607</a> | NE | Spy49_0311  | <a href="#">6985176</a> | NE | hlyX        | * |          |         | hemolysin                                                                                                  |
| M5005_Spy_0318  | <a href="#">3572608</a> | NE | Spy49_0312  | <a href="#">6985177</a> | NE | pflC        | * |          |         | pyruvate formate-lyase activating enzyme                                                                   |
| M5005_Spy_0319  | <a href="#">3572609</a> | NC | Spy49_0313  | <a href="#">6985178</a> | E  | ppaC        | * | SSA_1748 | SP_1534 | manganese-dependent inorganic pyrophosphatase                                                              |
| M5005_Spy_0320  | <a href="#">3572610</a> | NE | Spy49_0314  | <a href="#">6985179</a> | NE | -           | * |          |         | hypothetical protein M5005_Spy_0320                                                                        |
| M5005_Spy_0321c | <a href="#">3572572</a> | NE | Spy49_0315  | <a href="#">6985180</a> | NE | fhuG        | * |          |         | ferrichrome transporter permease                                                                           |
| M5005_Spy_0322c | <a href="#">3572573</a> | NE | Spy49_0316  | <a href="#">6985181</a> | NE | fhuB        | * |          |         | ferrichrome transporter permease                                                                           |
| M5005_Spy_0323c | <a href="#">3572574</a> | NE | Spy49_0317c | <a href="#">6985182</a> | NE | fhuD        | * |          |         | ferrichrome-binding protein                                                                                |
| M5005_Spy_0324c | <a href="#">3572575</a> | NE | Spy49_0318  | <a href="#">6985183</a> | NE | fhuA        | * |          |         | ferrichrome ABC transporter ATP-binding protein                                                            |
| M5005_Spy_0325c | <a href="#">3572576</a> | E  | Spy49_0319c | <a href="#">6985184</a> | E  | <b>murE</b> | * | SSA_1739 | SP_1530 | UDP-N-acetyl/muramoylalanine-D-glutamate-L-lysine ligase                                                   |
| M5005_Spy_0326  | <a href="#">3572577</a> | E  | Spy49_0320  | <a href="#">6985185</a> | E  | -           | * | SSA_1738 | SP_1529 | export protein for polysaccharides and teichoic acids                                                      |
| M5005_Spy_0327  | <a href="#">3572578</a> | NE | Spy49_0322  | <a href="#">6985186</a> | NE | upp         | * |          |         | uracil phosphoribosyltransferase                                                                           |
| M5005_Spy_0328  | <a href="#">3572579</a> | C  | Spy49_0323  | <a href="#">6985187</a> | E  | <b>clpP</b> | * |          |         | ATP-dependent Clp protease proteolytic subunit                                                             |
| M5005_Spy_0329  | <a href="#">3572580</a> | NE | Spy49_0325  | <a href="#">6985188</a> | NE | -           | * |          |         | hypothetical protein M5005_Spy_0329                                                                        |
| M5005_Spy_0330  | <a href="#">3572581</a> | E  | Spy49_0326  | <a href="#">6985189</a> | E  | <b>tmk</b>  | * | SSA_1722 | SP_0935 | thymidylate kinase                                                                                         |
| M5005_Spy_0331  | <a href="#">3572582</a> | E  | Spy49_0327  | <a href="#">6985190</a> | E  | <b>dnaX</b> | * | SSA_1721 |         | DNA polymerase III subunit delta'                                                                          |
| M5005_Spy_0332  | <a href="#">3572583</a> | NE | -           | -                       | -  | -           | * |          |         | tpl protein                                                                                                |
| M5005_Spy_0333  | <a href="#">3572584</a> | NC | Spy49_0328  | <a href="#">6985191</a> | NC | -           | * |          |         | signal peptidase-like protein                                                                              |
| M5005_Spy_0334  | <a href="#">3572585</a> | NC | Spy49_0329  | <a href="#">6985192</a> | C  | -           | * |          | SP_0937 | DNA replication initiation control protein YabA                                                            |
| M5005_Spy_0335  | <a href="#">3572586</a> | NE | Spy49_0330  | <a href="#">6985193</a> | C  | -           | * |          |         | corrin/porphyrin methyltransferase                                                                         |
| M5005_Spy_0336  | <a href="#">3572587</a> | NE | Spy49_0331  | <a href="#">6985194</a> | NE | -           | * |          |         | hypothetical protein M5005_Spy_0336                                                                        |
| M5005_Spy_0337c | <a href="#">3572588</a> | NE | Spy49_0332c | <a href="#">6985195</a> | NE | cutC        | * |          |         | copper homeostasis protein                                                                                 |
| M5005_Spy_0338  | <a href="#">3572589</a> | NE | Spy49_0333  | <a href="#">6985196</a> | NE | -           | * |          |         | arsenate reductase                                                                                         |
| M5005_Spy_0339c | <a href="#">3572590</a> | NC | Spy49_0334c | <a href="#">6985197</a> | NE | exoA        | * |          |         | exodeoxyribonuclease III                                                                                   |
| M5005_Spy_0340  | <a href="#">3572552</a> | NE | Spy49_0335  | <a href="#">6985198</a> | NE | lctO        | * |          |         | L-lactate oxidase                                                                                          |
| M5005_Spy_0341  | <a href="#">3572553</a> | NE | Spy49_0336  | <a href="#">6985199</a> | NE | prtS        | * |          |         | lactocepin                                                                                                 |
| M5005_Spy_0343  | <a href="#">3572554</a> | NE | -           | -                       | -  | -           | * |          |         | hypothetical protein M5005_Spy_0343                                                                        |
| M5005_Spy_0344  | <a href="#">3572555</a> | NE | Spy49_0337  | <a href="#">6985200</a> | NE | -           | * |          |         | permease                                                                                                   |
| M5005_Spy_0345  | <a href="#">3572556</a> | E  | Spy49_0338  | <a href="#">6985201</a> | E  | <b>metG</b> | * | SSA_1703 | SP_0788 | methionyl-tRNA synthetase                                                                                  |
| M5005_Spy_0346  | <a href="#">3572557</a> | NC | -           | -                       | -  | -           | * |          |         | hypothetical protein M5005_Spy_0346                                                                        |
| M5005_Spy_0347  | <a href="#">3572558</a> | NE | Spy49_0339  | <a href="#">6985202</a> | NE | nrdF        | * |          |         | ribonucleotide-diphosphate reductase subunit beta                                                          |
| M5005_Spy_0348  | <a href="#">3572559</a> | NE | Spy49_0340  | <a href="#">6985203</a> | NE | nrdI        | * |          |         | ribonucleotide reductase stimulatory protein                                                               |
| M5005_Spy_0349  | <a href="#">3572560</a> | NE | Spy49_0341  | <a href="#">6985204</a> | NE | nrdE.1      | * |          |         | ribonucleotide-diphosphate reductase subunit alpha                                                         |
| M5005_Spy_0350  | <a href="#">3572561</a> | NC | -           | -                       | -  | -           | * |          |         | hypothetical protein M5005_Spy_0350                                                                        |
| M5005_Spy_0351c | <a href="#">3572562</a> | NE | Spy49_0342c | <a href="#">6985205</a> | NE | spyA        | * |          |         | C3 family ADP-ribosyltransferase                                                                           |
| M5005_Spy_0352  | <a href="#">3572563</a> | NE | Spy49_0343  | <a href="#">6985206</a> | NC | -           | * |          |         | hypothetical protein M5005_Spy_0352                                                                        |
| M5005_Spy_0353  | <a href="#">3572564</a> | NE | Spy49_0344  | <a href="#">6985207</a> | NC | -           | * |          |         | hypothetical protein M5005_Spy_0353                                                                        |
| M5005_Spy_0354c | <a href="#">3572565</a> | NE | Spy49_0345c | <a href="#">6985208</a> | NE | -           | * |          |         | hypothetical protein M5005_Spy_0354                                                                        |
| M5005_Spy_0355  | <a href="#">3572566</a> | NE | Spy49_0346c | <a href="#">6985209</a> | NE | -           | * |          |         | hypothetical protein M5005_Spy_0355                                                                        |
| M5005_Spy_0356c | <a href="#">3572567</a> | NE | Spy49_0347  | <a href="#">6985210</a> | NE | speJ        | * |          |         | exotoxin type J                                                                                            |
| M5005_Spy_0357c | <a href="#">3572568</a> | NE | Spy49_0348  | <a href="#">6985211</a> | NE | -           | * |          |         | hypothetical protein M5005_Spy_0357                                                                        |
| M5005_Spy_0358  | <a href="#">3572569</a> | NE | Spy49_0349c | <a href="#">6985212</a> | NE | -           | * |          |         | hypothetical protein M5005_Spy_0358                                                                        |
|                 |                         |    | Spy49_0350c | <a href="#">6985213</a> | NE | -           | * |          |         |                                                                                                            |
|                 |                         |    | Spy49_0351c | <a href="#">6985214</a> | NE | -           | * |          |         |                                                                                                            |
|                 |                         |    | Spy49_0352c | <a href="#">6985215</a> | NE | -           | * |          |         |                                                                                                            |
|                 |                         |    | Spy49_0353c | <a href="#">6985216</a> | NE | -           | * |          |         |                                                                                                            |
|                 |                         |    | Spy49_0354c | <a href="#">6985217</a> | NC | -           | * |          |         |                                                                                                            |
|                 |                         |    | Spy49_0355c | <a href="#">6985218</a> | NE | -           | * |          |         |                                                                                                            |
|                 |                         |    | Spy49_0356c | <a href="#">6985219</a> | NE | -           | * |          |         |                                                                                                            |
|                 |                         |    | Spy49_0357c | <a href="#">6985220</a> | NE | -           | * |          |         |                                                                                                            |
|                 |                         |    | Spy49_0358c | <a href="#">6985221</a> | NE | -           | * |          |         |                                                                                                            |
|                 |                         |    | Spy49_0359c | <a href="#">6985222</a> | NE | -           | * |          |         |                                                                                                            |
|                 |                         |    | Spy49_0360c | <a href="#">6985309</a> | NE | -           | * |          |         |                                                                                                            |
|                 |                         |    | Spy49_0361c | <a href="#">6985304</a> | NE | -           | * |          |         |                                                                                                            |
|                 |                         |    | Spy49_0362c | <a href="#">6985305</a> | NE | -           | * |          |         |                                                                                                            |
|                 |                         |    | Spy49_0363c | <a href="#">6985306</a> | NE | -           | * |          |         |                                                                                                            |
|                 |                         |    | Spy49_0364c | <a href="#">6985307</a> | NC | -           | * |          |         |                                                                                                            |
|                 |                         |    | Spy49_0365c | <a href="#">6985308</a> | NE | -           | * |          |         |                                                                                                            |
|                 |                         |    | Spy49_0366c | <a href="#">6985309</a> | NE | -           | * |          |         |                                                                                                            |
|                 |                         |    | Spy49_0367c | <a href="#">6985310</a> | NE | -           | * |          |         |                                                                                                            |
|                 |                         |    | Spy49_0368c | <a href="#">6985311</a> | NE | -           | * |          |         |                                                                                                            |
|                 |                         |    | Spy49_0369  | <a href="#">6985312</a> | E  | -           | * |          |         |                                                                                                            |
|                 |                         |    | Spy49_0370  | <a href="#">6985313</a> | NE | -           | * |          |         |                                                                                                            |
|                 |                         |    | Spy49_0371  | <a href="#">6985314</a> | NE | -           | * |          |         |                                                                                                            |
| M5005_Spy_0359  | <a href="#">3572570</a> | NE | Spy49_0372  | <a href="#">6985315</a> | NE | fabG        | * |          |         | 3-ketoacyl-ACP reductase                                                                                   |
| M5005_Spy_0360  | <a href="#">3572571</a> | NE | Spy49_0373  | <a href="#">6985316</a> | NE | -           | * |          |         | NAD-dependent oxidoreductase                                                                               |
| M5005_Spy_0361  | <a href="#">3572533</a> | NE | Spy49_0374  | <a href="#">6985317</a> | NE | glpT        | * |          |         | phosphoglycerate transporter protein                                                                       |
|                 |                         |    |             |                         |    | <b>glmU</b> | * | SSA_1642 | SP_0988 | bifunctional N-acetylglucosamine-1-phosphate uridylyltransferase/glucosamine-1-phosphate acetyltransferase |
| M5005_Spy_0362  | <a href="#">3572534</a> | E  | Spy49_0375  | <a href="#">6985318</a> | E  | -           | * |          |         | phosphohydrolase                                                                                           |
| M5005_Spy_0363  | <a href="#">3572535</a> | NE | Spy49_0376  | <a href="#">6985319</a> | NE | -           | * |          |         | hypothetical protein M5005_Spy_0364                                                                        |
| M5005_Spy_0364  | <a href="#">3572536</a> | NC | Spy49_0377  | <a href="#">6985320</a> | NE | -           | * |          |         | hypothetical protein M5005_Spy_0366                                                                        |
| M5005_Spy_0365  | <a href="#">3572537</a> | E  | Spy49_0378  | <a href="#">6985321</a> | NC | <b>pfs</b>  | * |          | SP_0991 | 5'-methylthioadenosine/S-adenosylhomocysteine nucleosidase                                                 |
| M5005_Spy_0366  | <a href="#">3572538</a> | NE | Spy49_0379  | <a href="#">6985322</a> | NE | -           | * |          |         | hypothetical protein M5005_Spy_0366                                                                        |
| M5005_Spy_0367c | <a href="#">3572539</a> | NC | Spy49_0380c | <a href="#">6985323</a> | NC | mtsR        | * |          |         | iron-dependent repressor                                                                                   |
| M5005_Spy_0368  | <a href="#">3572540</a> | NE | Spy49_0381  | <a href="#">6985324</a> | NE | mtsA        | * |          |         | manganese-binding protein                                                                                  |
| M5005_Spy_0369  | <a href="#">3572541</a> | NE | Spy49_0382  | <a href="#">6985325</a> | NE | mtsB        | * |          |         | manganese transporter ATP-binding protein                                                                  |
| M5005_Spy_0370  | <a href="#">3572542</a> | NE | Spy49_0383  | <a href="#">6985326</a> | NE | mtsC        | * |          |         | manganese transporter membrane protein                                                                     |
| M5005_Spy_0371c | <a href="#">3572543</a> | NE | Spy49_0384c | <a href="#">6985327</a> | NE | cypB        | * |          |         | peptidyl-prolyl cis-trans isomerase                                                                        |
| M5005_Spy_0372  | <a href="#">3572544</a> | E  | Spy49_0385  | <a href="#">6985328</a> | E  | <b>ftsK</b> | * |          | SP_0878 | cell division protein                                                                                      |
| M5005_Spy_0373c | <a href="#">3572545</a> | NE | Spy49_0386c | <a href="#">6985329</a> | NE | -           | * |          |         | hypothetical protein M5005_Spy_0373                                                                        |
| M5005_Spy_0374  | <a href="#">3572546</a> | NC | Spy49_0387  | <a href="#">6985330</a> | NC | rpIK        | * |          |         | 50S ribosomal protein L11                                                                                  |

|                 |         |    |             |         |    |           |   |          |         |                                                             |
|-----------------|---------|----|-------------|---------|----|-----------|---|----------|---------|-------------------------------------------------------------|
| M5005_Spy_0375  | 3572547 | E  | Spy49_0388  | 6985331 | E  | rpIA      | * | SSA_1622 |         | 50S ribosomal protein L1                                    |
| M5005_Spy_0376  | 3572548 | NE |             |         |    | -         |   |          |         | transposase                                                 |
| M5005_Spy_0377  | 3572549 | E  | Spy49_0390  | 6985332 | E  | pyrH      | * | SSA_1620 | SP_0944 | uridylylase kinase                                          |
| M5005_Spy_0380  | 3572513 | E  | Spy49_0391  | 6985333 | E  | frr       | * | SSA_1619 | SP_0945 | ribosome recycling factor                                   |
| M5005_Spy_0381  | 3572514 | NE | Spy49_0392  | 6985334 | NE | -         | * |          |         | S1 RNA-binding domain-containing protein                    |
| M5005_Spy_0382  | 3572515 | NE | Spy49_0394  | 6985335 | NE | msrA.2    | * |          |         | methionine sulfoxide reductase A                            |
| M5005_Spy_0383  | 3572516 | NE | Spy49_0395  | 6985336 | NE | -         | * |          |         | hypothetical protein M5005_Spy_0383                         |
| M5005_Spy_0384  | 3572517 | NE | Spy49_0396  | 6985337 | NE | -         | * |          |         | surface antigen                                             |
| M5005_Spy_0385  | 3572518 | NE | Spy49_0398  | 6985338 | NE | -         | * |          |         | hypothetical protein M5005_Spy_0385                         |
| M5005_Spy_0386  | 3572519 | NE | Spy49_0399  | 6985339 | NE | phoH      | * |          |         | phoH protein                                                |
| M5005_Spy_0387  | 3572520 | NE | Spy49_0400  | 6985340 | NE | -         | * |          |         | uracil DNA glycosylase                                      |
| M5005_Spy_0388  | 3572521 | E  | Spy49_0401  | 6985341 | E  | -         | * |          |         | metalloprotease                                             |
| M5005_Spy_0389  | 3572522 | E  | Spy49_0402  | 6985342 | E  | dgk       | * |          | SP_0967 | diacylglycerol kinase                                       |
| M5005_Spy_0390  | 3572523 | C  | Spy49_0403  | 6985343 | E  | era       | * |          | SP_0968 | GTP-binding protein Era                                     |
| M5005_Spy_0391  | 3572524 | NE | Spy49_0404  | 6985344 | NE | -         | * |          |         | phosphohydrolase                                            |
| M5005_Spy_0392c | 3572525 | NE | Spy49_0405c | 6985345 | NE | -         | * |          |         | hypothetical protein M5005_Spy_0392                         |
| M5005_Spy_0393  | 3572526 | NE | Spy49_0406  | 6985346 | NE | -         | * |          |         | hypothetical protein M5005_Spy_0393                         |
| M5005_Spy_0394  | 3572527 | NE |             |         |    | -         | * |          |         | hypothetical protein M5005_Spy_0394                         |
| M5005_Spy_0395c | 3572528 | NE |             |         |    | -         | * |          |         | transposase                                                 |
| M5005_Spy_0396c | 3572529 | NC | Spy49_0407c | 6985347 | NC | -         | * |          |         | transposase                                                 |
| M5005_Spy_0397c | 3572530 | NE | Spy49_0408c | 6985348 | NE | -         | * |          |         | transposase                                                 |
| M5005_Spy_0398  | 3572531 | NE | Spy49_0409  | 6985349 | NE | -         | * |          |         | bacteriocin                                                 |
| M5005_Spy_0399  | 3572532 | NE | Spy49_0410  | 6985350 | NE | -         | * |          |         | hypothetical protein M5005_Spy_0399                         |
| M5005_Spy_0400  | 3572494 | NE | Spy49_0411  | 6985351 | NE | silD      | * |          |         | hypothetical protein M5005_Spy_0400                         |
| M5005_Spy_0401c | 3572495 | NC | Spy49_0412  | 6985352 | NC | -         | * |          |         | hypothetical protein M5005_Spy_0401                         |
| M5005_Spy_0402  | 3572496 | NE | Spy49_0413  | 6985353 | NE | -         | * |          |         | hypothetical protein M5005_Spy_0402                         |
| M5005_Spy_0403  | 3572497 | NE | Spy49_0414c | 6985354 | NE | -         | * |          |         | hypothetical protein M5005_Spy_0403                         |
| M5005_Spy_0404c | 3572498 | NE |             |         |    | -         | * |          |         | hypothetical protein M5005_Spy_0404                         |
| M5005_Spy_0405  | 3572499 | NC |             |         |    | -         | * |          |         | hypothetical protein M5005_Spy_0405                         |
| M5005_Spy_0406c | 3572500 | NE |             |         |    | -         | * |          |         | hypothetical protein M5005_Spy_0406                         |
| M5005_Spy_0407  | 3572501 | NE | Spy49_0415  | 6985355 | NE | mutR      | * |          |         | transcriptional regulator                                   |
| M5005_Spy_0408  | 3572502 | NE | Spy49_0416  | 6985356 | NE | fpg       | * |          |         | formamidopyrimidine-DNA glycosylase                         |
| M5005_Spy_0409  | 3572503 | E  | Spy49_0417  | 6985357 | E  | coaE      | * | SSA_1606 | SP_0971 | dephospho-CoA kinase                                        |
| M5005_Spy_0410  | 3572504 | NE | Spy49_0418  | 6985358 | NC | -         | * |          |         | ATPase                                                      |
| M5005_Spy_0411  | 3572505 | NE | Spy49_0419  | 6985359 | NE | -         | * |          |         | multidrug resistance protein B                              |
| M5005_Spy_0412  | 3572506 | NC | Spy49_0420  | 6985360 | NC | rpmG      | * |          |         | 50S ribosomal protein L33                                   |
| M5005_Spy_0413  | 3572507 | E  | Spy49_0421  | 6985361 | NC | secG      | * | SSA_1604 |         | preprotein translocase subunit SecG                         |
| M5005_Spy_0414  | 3572508 | NE | Spy49_0422  | 6985362 | NC | vacB      | * |          |         | exoribonuclease II                                          |
| M5005_Spy_0415  | 3572509 | NC | Spy49_0423  | 6985363 | NC | smfB      | * |          |         | SsrA-binding protein                                        |
| M5005_Spy_0416  | 3572510 | NE | Spy49_0424  | 6985364 | NE | -         | * |          |         | glutaminyl-peptide cyclotransferase                         |
| M5005_Spy_0417c | 3572511 | NE | Spy49_0425c | 6985365 | NE | pcp       | * |          |         | pyrrolidone-carboxylate peptidase                           |
| M5005_Spy_0418c | 3572512 | NE | Spy49_0426c | 6985366 | NE | -         | * |          |         | permease                                                    |
| M5005_Spy_0419c | 3572474 | NE | Spy49_0427c | 6985367 | NE | -         | * |          |         | permease                                                    |
| M5005_Spy_0420c | 3572475 | NE | Spy49_0428c | 6985368 | NE | -         | * |          |         | glucosyltransferase                                         |
| M5005_Spy_0421c | 3572476 | NE | Spy49_0429c | 6985369 | NE | gloA      | * |          |         | lactoylglutathione lyase                                    |
| M5005_Spy_0422c | 3572477 | NE | Spy49_0430c | 6985370 | NE | -         | * |          |         | NAD(P)H-dependent quinone reductase                         |
| M5005_Spy_0423c | 3572478 | NE | Spy49_0431c | 6985371 | NE | pepQ      | * |          |         | Xaa-Pro dipeptidase                                         |
| M5005_Spy_0424  | 3572479 | NC | Spy49_0432  | 6985372 | E  | ccpA      | * |          |         | catabolite control protein A                                |
| M5005_Spy_0425  | 3572480 | C  | Spy49_0433  | 6985373 | E  | -         | * |          | SP_1075 | glucosyltransferase                                         |
| M5005_Spy_0426  | 3572481 | E  | Spy49_0434  | 6985374 | E  | -         | * |          |         | 1,2-diacylglycerol 3-glucosyltransferase                    |
| M5005_Spy_0427  | 3572482 | E  | Spy49_0435  | 6985375 | E  | thrS      | * | SSA_1571 | SP_1631 | threonyl-tRNA synthetase                                    |
| M5005_Spy_0428  | 3572483 | NE | Spy49_0436  | 6985376 | NE | dirA/tagH | * |          |         | daunorubicin resistance ATP-binding protein                 |
| M5005_Spy_0429  | 3572484 | NE | Spy49_0437  | 6985377 | NE | -         | * |          |         | daunorubicin resistance transmembrane protein               |
| M5005_Spy_0430  | 3572485 | NE | Spy49_0438  | 6985378 | NE | -         | * |          |         | ABC transporter permease                                    |
| M5005_Spy_0431  | 3572486 | NC | Spy49_0439  | 6985379 | NC | -         | * |          |         | dihydroxyacetone kinase                                     |
| M5005_Spy_0432  | 3572487 | NE | Spy49_0440  | 6985380 | NE | -         | * |          |         | acetyl-CoA acetyltransferase                                |
| M5005_Spy_0433  | 3572488 | NE | Spy49_0441  | 6985381 | NE | -         | * |          |         | long-chain-fatty-acid-CoA ligase                            |
| M5005_Spy_0434  | 3572489 | NE | Spy49_0442  | 6985382 | NE | -         | * |          |         | hypothetical protein M5005_Spy_0434                         |
| M5005_Spy_0435  | 3572490 | E  | Spy49_0444  | 6985463 | E  | vicR      | * | SSA_1565 | SP_1227 | two-component response regulator                            |
| M5005_Spy_0436  | 3572491 | NE | Spy49_0445  | 6985464 | NE | vicK      | * |          |         | two-component sensor histidine kinase                       |
| M5005_Spy_0437  | 3572492 | NE | Spy49_0446  | 6985465 | NE | vicX      | * |          |         | Zn-dependent hydrolase                                      |
| M5005_Spy_0438  | 3572493 | C  | Spy49_0447  | 6985466 | NC | mc        | * |          | SP_1248 | ribonuclease III                                            |
| M5005_Spy_0439  | 3572455 | NE | Spy49_0448  | 6985467 | NC | smc       | * |          |         | chromosome partition protein                                |
| M5005_Spy_0440c | 3572456 | NE | Spy49_0449c | 6985468 | NE | -         | * |          |         | transcriptional regulator                                   |
| M5005_Spy_0441  | 3572457 | NE | Spy49_0450  | 6985469 | NE | aroE      | * |          |         | shikimate 5-dehydrogenase                                   |
| M5005_Spy_0442  | 3572458 | NE | Spy49_0451  | 6985470 | NE | -         | * |          |         | hypothetical protein M5005_Spy_0442                         |
| M5005_Spy_0443  | 3572459 | NE | Spy49_0453  | 6985471 | NC | -         | * |          |         | hypothetical protein M5005_Spy_0443                         |
| M5005_Spy_0444  | 3572460 | NE | Spy49_0454  | 6985472 | NE | -         | * |          |         | hypothetical protein M5005_Spy_0444                         |
| M5005_Spy_0445  | 3572461 | NE | Spy49_0455  | 6985473 | NE | metK1     | * |          |         | S-adenosylmethionine synthetase                             |
| M5005_Spy_0446  | 3572462 | NE | Spy49_0456  | 6985474 | NE | -         | * |          |         | hypothetical protein M5005_Spy_0446                         |
| M5005_Spy_0447  | 3572463 | NE | Spy49_0457  | 6985475 | NE | -         | * |          |         | cell wall biosynthesis glucosyltransferase                  |
| M5005_Spy_0448  | 3572464 | NC | Spy49_0458  | 6985476 | NE | -         | * |          |         | hypothetical protein M5005_Spy_0448                         |
| M5005_Spy_0449  | 3572465 | NE | Spy49_0459  | 6985477 | NE | hasB.2    | * |          |         | UDP-glucose 6-dehydrogenase                                 |
| M5005_Spy_0450  | 3572466 | NE | Spy49_0460  | 6985478 | NE | mefE      | * |          |         | macrolide-efflux protein                                    |
| M5005_Spy_0451c | 3572467 | NE | Spy49_0461c | 6985479 | NE | -         | * |          |         | transcriptional regulator                                   |
| M5005_Spy_0452c | 3572468 | NE | Spy49_0462c | 6985480 | NE | -         | * |          |         | chromosome segregation ATPase                               |
| M5005_Spy_0453c | 3572469 | NE | Spy49_0463c | 6985481 | NE | -         | * |          |         | chromosome segregation ATPase                               |
| M5005_Spy_0454c | 3572470 | NE | Spy49_0464c | 6985482 | NE | -         | * |          |         | hypothetical protein M5005_Spy_0454                         |
| M5005_Spy_0455c | 3572471 | NE | Spy49_0465  | 6985483 | NC | -         | * |          |         | hypothetical protein M5005_Spy_0455                         |
| M5005_Spy_0456  | 3572472 | NC | Spy49_0466  | 6985484 | NE | -         | * |          |         | plasmid stabilization system antitoxin protein              |
| M5005_Spy_0457  | 3572473 | NE |             |         |    | -         | * |          |         | plasmid stabilization system protein                        |
| M5005_Spy_0458  | 3572435 | NE | Spy49_0467  | 6985485 | NE | -         | * |          |         | hypothetical protein M5005_Spy_0458                         |
| M5005_Spy_0459  | 3572436 | NE | Spy49_0468  | 6985486 | NE | -         | * |          |         | portal protein                                              |
| M5005_Spy_0460  | 3572437 | NE | Spy49_0469  | 6985487 | NE | -         | * |          |         | hypothetical protein M5005_Spy_0460                         |
| M5005_Spy_0461  | 3572438 | NE | Spy49_0470c | 6985488 | NE | -         | * |          |         | hypothetical protein M5005_Spy_0461                         |
| M5005_Spy_0462  | 3572439 | NE | Spy49_0471  | 6985489 | NE | -         | * |          |         | asparagine synthetase A                                     |
| M5005_Spy_0463  | 3572440 | NE | Spy49_0473  | 6985490 | NE | -         | * |          |         | hypothetical protein M5005_Spy_0463                         |
| M5005_Spy_0464  | 3572441 | NE | Spy49_0474  | 6985491 | NE | -         | * |          |         | microcin C7 self-immunity protein                           |
| M5005_Spy_0465  | 3572442 | NE | Spy49_0475  | 6985492 | NE | mccF      | * |          |         | hypothetical protein M5005_Spy_0465                         |
| M5005_Spy_0466  | 3572443 | NE | Spy49_0476  | 6985493 | NE | -         | * |          |         | hypothetical protein M5005_Spy_0466                         |
| M5005_Spy_0467c | 3572444 | NE | Spy49_0477c | 6985494 | NE | -         | * |          |         | transposase                                                 |
| M5005_Spy_0468c | 3572445 | NE | Spy49_0478c | 6985495 | NE | -         | * |          |         | transposase                                                 |
| M5005_Spy_0469  | 3572446 | NE | Spy49_0479  | 6985496 | NE | -         | * |          |         | hypothetical protein M5005_Spy_0469                         |
| M5005_Spy_0470  | 3572447 | NE | Spy49_0480  | 6985497 | NE | -         | * |          |         | HAD superfamily hydrolase                                   |
| M5005_Spy_0471  | 3572448 | NE | Spy49_0481  | 6985498 | NE | -         | * |          |         | HAD superfamily hydrolase                                   |
| M5005_Spy_0472  | 3572449 | E  | Spy49_0482  | 6985499 | E  | ftsY      | * | SSA_1557 | SP_1244 | cell division protein                                       |
| M5005_Spy_0473c | 3572450 | NE | Spy49_0483c | 6985500 | NE | -         | * |          |         | multidrug resistance protein B                              |
| M5005_Spy_0474  | 3572451 | NE | Spy49_0484  | 6985501 | NE | licT/bglG | * |          |         | BigG family transcription antiterminator                    |
| M5005_Spy_0475  | 3572452 | NE | Spy49_0485  | 6985502 | NE | -         | * |          |         | PTS system beta-glucoside-specific transporter subunit IABC |
| M5005_Spy_0476  | 3572453 | NE | Spy49_0487  | 6985503 | NE | bglA      | * |          |         | 6-phospho-beta-glucosidase                                  |
| M5005_Spy_0477c | 3572454 | NE | Spy49_0488c | 6985504 | NE | -         | * |          |         | hypothetical protein M5005_Spy_0477                         |

|                 |         |    |             |         |    |       |   |          |                                             |                                                                                                           |
|-----------------|---------|----|-------------|---------|----|-------|---|----------|---------------------------------------------|-----------------------------------------------------------------------------------------------------------|
| M5005_Spy_0478c | 3572416 | NE | Spy49_0489c | 6985505 | NE | -     | * |          | hypothetical protein M5005_Spy_0478         |                                                                                                           |
| M5005_Spy_0479  | 3572417 | NE |             |         |    |       |   |          | hypothetical protein M5005_Spy_0479         |                                                                                                           |
| M5005_Spy_0480  | 3572419 | NE | Spy49_0490  | 6985506 | NE | -     | * |          | transcription accessory protein             |                                                                                                           |
| M5005_Spy_0481c | 3572418 | NC |             |         |    |       |   |          | hypothetical protein M5005_Spy_0481         |                                                                                                           |
| M5005_Spy_0482  | 3572420 | NE | Spy49_0491  | 6985507 | NE | -     | * |          | hypothetical protein M5005_Spy_0482         |                                                                                                           |
| M5005_Spy_0483  | 3572421 | NE | Spy49_0493  | 6985508 | NE | -     | * |          | stress-responsive transcriptional regulator |                                                                                                           |
| M5005_Spy_0484  | 3572422 | E  | Spy49_0494  | 6985509 | E  | ptsK  | * | SP_1413  | HPr kinase/phosphorylase                    |                                                                                                           |
| M5005_Spy_0485  | 3572423 | NE | Spy49_0495  | 6985510 | NE | igt   | * |          | prolipoprotein diacylglyceryl transferase   |                                                                                                           |
| M5005_Spy_0486  | 3572424 | NE | Spy49_0496  | 6985511 | NE | -     | * |          | hypothetical protein M5005_Spy_0486         |                                                                                                           |
| M5005_Spy_0487  | 3572425 | NE | Spy49_0497  | 6985512 | NE | -     | * |          | hypothetical protein M5005_Spy_0487         |                                                                                                           |
| M5005_Spy_0488c | 3572426 | NE | Spy49_0498  | 6985513 | NE | -     | * |          | hypothetical protein M5005_Spy_0488         |                                                                                                           |
| M5005_Spy_0489  | 3572427 | NE | Spy49_0499  | 6985514 | NE | -     | * |          | U32 family peptidase                        |                                                                                                           |
| M5005_Spy_0491  | 3572429 | NE | Spy49_0500  | 6985515 | NE | -     | * |          | U32 family peptidase                        |                                                                                                           |
| M5005_Spy_0492c | 3572430 | NC |             |         |    |       |   |          | hypothetical protein M5005_Spy_0492         |                                                                                                           |
| M5005_Spy_0493  | 3572431 | NE | Spy49_0501  | 6985516 | NE | -     | * |          | hypothetical protein M5005_Spy_0493         |                                                                                                           |
| M5005_Spy_0494c | 3572432 | NC | Spy49_0502c | 6985517 | NC | -     | * |          | hypothetical protein M5005_Spy_0494         |                                                                                                           |
| M5005_Spy_0495c | 3572433 | E  | Spy49_0503c | 6985518 | E  | lysS  | * | SSA_1529 | lysyl-tRNA synthetase                       |                                                                                                           |
| M5005_Spy_0496  | 3572434 | NE | Spy49_0504  | 6985519 | NE | -     | * |          | HAD superfamily hydrolase                   |                                                                                                           |
| M5005_Spy_0497c | 3572396 | NE | Spy49_0505c | 6985520 | NE | -     | * |          | phosphoglycerate mutase                     |                                                                                                           |
| M5005_Spy_0498c | 3572397 | NE | Spy49_0506c | 6985521 | NE | -     | * |          | transcriptional regulator                   |                                                                                                           |
| M5005_Spy_0499c | 3572398 | NE | Spy49_0507c | 6985522 | NE | -     | * |          | thiamine transporter                        |                                                                                                           |
| M5005_Spy_0500c | 3572399 | C  | Spy49_0508c | 6985523 | NE | -     | * |          | N-acetylmuramoyl-L-alanine amidase          |                                                                                                           |
| M5005_Spy_0501  | 3572400 | NE | Spy49_0509  | 6985524 | NE | -     | * |          | hypothetical protein M5005_Spy_0501         |                                                                                                           |
| M5005_Spy_0502  | 3572401 | NE | Spy49_0510  | 6985525 | NE | -     | * |          | hypothetical protein M5005_Spy_0502         |                                                                                                           |
| M5005_Spy_0503c | 3572402 | NE | Spy49_0511c | 6985526 | NE | -     | * |          | glutathione peroxidase                      |                                                                                                           |
| M5005_Spy_0504c | 3572403 | NE | Spy49_0512c | 6985527 | NE | pepF  | * |          | oligoendopeptidase F                        |                                                                                                           |
| M5005_Spy_0505  | 3572404 | NE | Spy49_0513  | 6985528 | NE | ppc   | * |          | phosphoenolpyruvate carboxylase             |                                                                                                           |
| M5005_Spy_0506  | 3572405 | E  | Spy49_0514  | 6985529 | E  | ftsW  | * | SSA_1522 | cell division protein                       |                                                                                                           |
| M5005_Spy_0507c | 3572406 | NC |             |         |    |       |   |          | hypothetical protein M5005_Spy_0507         |                                                                                                           |
| M5005_Spy_0508  | 3572407 | E  | Spy49_0515  | 6985530 | NC | tuf   | * | SSA_1520 | SP_1489                                     | elongation factor Tu                                                                                      |
| M5005_Spy_0509  | 3572408 | C  | Spy49_0516  | 6985531 | E  | tpiA  | * | SSA_0859 | SP_1574                                     | triosephosphate isomerase                                                                                 |
| M5005_Spy_0510c | 3572409 | E  | Spy49_0517c | 6985532 | E  | murN  | * |          | SP_0616                                     | factor essential for expression of methicillin resistance                                                 |
| M5005_Spy_0511c | 3572410 | E  | Spy49_0518c | 6985533 | E  | murM  | * | SSA_0862 |                                             | UDP-N-acetylmuramoylpentapeptide-lysine N(6)-alanyltransferase/UDP-N-acetylmuramoylpentapeptide-lysi...   |
| M5005_Spy_0512c | 3572411 | NE | Spy49_0519c | 6985534 | NE | -     | * |          |                                             | HAD superfamily hydrolase                                                                                 |
| M5005_Spy_0513c | 3572412 | NC |             |         |    |       |   |          |                                             | hypothetical protein M5005_Spy_0513                                                                       |
| M5005_Spy_0514c | 3572413 | NE | Spy49_0520c | 6985535 | NE | -     | * |          |                                             | dGTP triphosphohydrolase                                                                                  |
| M5005_Spy_0515  | 3572414 | NE | Spy49_0521  | 6985536 | NE | -     | * |          |                                             | hypothetical protein M5005_Spy_0515                                                                       |
| M5005_Spy_0516  | 3572415 | E  | Spy49_0522  | 6985537 | E  | pacL  | * |          | SP_1551                                     | calcium-transporting ATPase                                                                               |
| M5005_Spy_0517c | 3572377 | NE | Spy49_0523c | 6985538 | NE | regR  | * |          |                                             | LacI family transcriptional regulator                                                                     |
| M5005_Spy_0518c | 3572378 | NE | Spy49_0524c | 6985539 | NE | -     | * |          |                                             | oligoacetyluronate lyase                                                                                  |
| M5005_Spy_0519c | 3572379 | NE | Spy49_0525c | 6985540 | NC | agaD  | * |          |                                             | PTS system N-acetylgalactosamine-specific transporter subunit IID                                         |
| M5005_Spy_0520c | 3572380 | NE | Spy49_0526c | 6985541 | NE | agaW  | * |          |                                             | PTS system N-acetylgalactosamine-specific transporter subunit IIC                                         |
| M5005_Spy_0521c | 3572381 | NE | Spy49_0527c | 6985542 | NE | agaV  | * |          |                                             | PTS system N-acetylgalactosamine-specific transporter subunit IIB                                         |
| M5005_Spy_0522c | 3572382 | NE | Spy49_0528c | 6985543 | NE | ugl   | * |          |                                             | unsaturated glucuronyl hydrolase                                                                          |
| M5005_Spy_0523  | 3572383 | NE | Spy49_0529c | 6985544 | NE | agaF  | * |          |                                             | hypothetical protein M5005_Spy_0523                                                                       |
| M5005_Spy_0524  | 3572384 | NE | Spy49_0530  | 6985545 | NE | idnO  | * |          |                                             | gluconate 5-dehydrogenase                                                                                 |
| M5005_Spy_0525  | 3572385 | NE | Spy49_0531  | 6985546 | NE | -     | * |          |                                             | hypothetical protein M5005_Spy_0525                                                                       |
| M5005_Spy_0526  | 3572386 | NE | Spy49_0532  | 6985547 | NE | kdgK  | * |          |                                             | 2-dehydro-3-deoxygluconokinase                                                                            |
| M5005_Spy_0527  | 3572387 | NE | Spy49_0533  | 6985548 | NE | kgdA  | * |          |                                             | keto-hydroxyglutarate-aldolase/keto-deoxy-phosphogluconate aldolase                                       |
| M5005_Spy_0528  | 3572388 | NE | Spy49_0534  | 6985549 | NE | -     | * |          |                                             | beta-phosphoglucomutase/glucose-1-phosphate phosphodismutase                                              |
| M5005_Spy_0529  | 3572389 | NE | Spy49_0535  | 6985550 | NE | -     | * |          |                                             | (Fe-S)-binding protein                                                                                    |
| M5005_Spy_0530  | 3572390 | E  | Spy49_0536  | 6985551 | E  | prfB  | * | SSA_0869 | SP_0755                                     | peptide chain release factor 2                                                                            |
| M5005_Spy_0531  | 3572391 | NC | Spy49_0537  | 6985552 | NC | ftsE  | * |          |                                             | cell division ATP-binding protein                                                                         |
| M5005_Spy_0532  | 3572392 | C  | Spy49_0538  | 6985553 | E  | ftsX  | * | SSA_0871 | SP_0757                                     | cell division protein                                                                                     |
| M5005_Spy_0533c | 3572393 | NE | Spy49_0539c | 6985554 | NE | -     | * |          |                                             | hydroxyacylglutathione hydrolase                                                                          |
| M5005_Spy_0534  | 3572394 | NE | Spy49_0540  | 6985555 | NE | -     | * |          |                                             | acetoin reductase                                                                                         |
| M5005_Spy_0535  | 3572395 | NC |             |         |    |       |   |          |                                             | acetoin dehydrogenase, partial bifunctional ATP-dependent DNA helicase/DNA polymerase III subunit epsilon |
| M5005_Spy_0536  | 3572358 | NE | Spy49_0541  | 6985556 | NE | dinG  | * |          |                                             | aspartate aminotransferase                                                                                |
| M5005_Spy_0537  | 3572359 | NE | Spy49_0543  | 6985557 | NE | aspC  | * |          |                                             | asparaginyl-tRNA synthetase                                                                               |
| M5005_Spy_0538  | 3572360 | E  | Spy49_0544  | 6985558 | E  | asnC  | * | SP_1542  |                                             | hypothetical protein M5005_Spy_0539                                                                       |
| M5005_Spy_0539  | 3572361 | NE | Spy49_0545  | 6985559 | E  | -     | * |          |                                             | transporter                                                                                               |
| M5005_Spy_0540  | 3572362 | NE | Spy49_0546  | 6985560 | NE | -     | * |          |                                             | hypothetical protein M5005_Spy_0541                                                                       |
| M5005_Spy_0541  | 3572363 | NE | Spy49_0547  | 6985561 | NE | -     | * |          |                                             | dipeptidase                                                                                               |
| M5005_Spy_0542  | 3572364 | NE | Spy49_0548  | 6985562 | NE | pepD  | * |          |                                             | high-affinity zinc uptake system protein znuA                                                             |
| M5005_Spy_0543  | 3572365 | NE | Spy49_0549  | 6985563 | NE | adcA  | * |          |                                             | GntR family transcriptional regulator                                                                     |
| M5005_Spy_0544  | 3572366 | NE | Spy49_0550  | 6985564 | NE | -     | * |          |                                             | galactosamine-6-phosphate deaminase                                                                       |
| M5005_Spy_0545  | 3572367 | NE | Spy49_0551  | 6985565 | NE | agaS  | * |          |                                             | 50S ribosomal protein L31                                                                                 |
| M5005_Spy_0546c | 3572368 | C  | Spy49_0552c | 6985566 | NC | rpmE2 | * | SP_1299  |                                             | phosphoesterase, DHH family protein                                                                       |
| M5005_Spy_0547c | 3572369 | NC | Spy49_0554c | 6985567 | NE | -     | * |          |                                             | flavodoxin                                                                                                |
| M5005_Spy_0548  | 3572370 | C  | Spy49_0555  | 6985568 | NE | flaV  | * | SP_1297  |                                             | hypothetical protein M5005_Spy_0549                                                                       |
| M5005_Spy_0549  | 3572371 | NE | Spy49_0556  | 6985569 | NC | -     | * |          |                                             | chloride channel protein                                                                                  |
| M5005_Spy_0550  | 3572372 | NE | Spy49_0557  | 6985570 | C  | -     | * |          |                                             | 50S ribosomal protein L19                                                                                 |
| M5005_Spy_0551  | 3572373 | NC | Spy49_0558  | 6985571 | NC | rplS  | * |          |                                             | DNA gyrase                                                                                                |
| M5005_Spy_0552  | 3572375 | NE | Spy49_0559  | 6985572 | NE | -     | * |          |                                             | DNA gyrase subunit B                                                                                      |
| M5005_Spy_0553  | 3572376 | E  | Spy49_0560  | 6985574 | E  | gyrB  | * | SSA_0878 | SP_0806                                     | separation ring formation regulator EzrA                                                                  |
| M5005_Spy_0554  | 3572379 | E  | Spy49_0561  | 6985575 | E  | ezrA  | * |          | SP_0807                                     | hypothetical protein M5005_Spy_0555                                                                       |
| M5005_Spy_0555c | 3572340 | NE | Spy49_0562c | 6985576 | NE | -     | * |          |                                             | phosphoryruvate hydratase                                                                                 |
| M5005_Spy_0556  | 3572341 | E  | Spy49_0563  | 6985577 | E  | eno   | * | SSA_0886 | SP_1128                                     | transposase                                                                                               |
| M5005_Spy_0557c | 3572342 | NE | Spy49_0564c | 6985578 | NE | -     | * |          |                                             | transposase                                                                                               |
| M5005_Spy_0558c | 3572343 | NE | Spy49_0565c | 6985579 | NC | -     | * |          |                                             | transposase                                                                                               |
| M5005_Spy_0559c | 3572344 | NE | Spy49_0566c | 6985580 | NE | -     | * |          |                                             | transcriptional regulator                                                                                 |
| M5005_Spy_0560c | 3572345 | NE |             |         |    |       |   |          |                                             | transcriptional regulator                                                                                 |
| M5005_Spy_0561  | 3572346 | NE | Spy49_0567  | 6985581 | NC | epf   | * |          |                                             | extracellular matrix binding protein                                                                      |
| M5005_Spy_0562  | 3572347 | NE | Spy49_0568  | 6985582 | NE | sagA  | * |          |                                             | streptolysin S                                                                                            |
| M5005_Spy_0563  | 3572348 | NE | Spy49_0569  | 6985583 | NE | sagB  | * |          |                                             | streptolysin S biosynthesis protein                                                                       |
| M5005_Spy_0564  | 3572349 | NE | Spy49_0570  | 6985584 | NE | sagC  | * |          |                                             | streptolysin S biosynthesis protein                                                                       |
| M5005_Spy_0565  | 3572350 | NE | Spy49_0572  | 6985585 | NE | sagD  | * |          |                                             | streptolysin S biosynthesis protein                                                                       |
| M5005_Spy_0566  | 3572351 | NE | Spy49_0573  | 6985586 | NE | sagE  | * |          |                                             | streptolysin S self-immunity protein                                                                      |
| M5005_Spy_0567  | 3572352 | NE | Spy49_0574  | 6985587 | NE | sagF  | * |          |                                             | streptolysin S biosynthesis protein                                                                       |
| M5005_Spy_0568  | 3572353 | NE | Spy49_0575  | 6985588 | C  | sagG  | * |          |                                             | streptolysin S export ATP-binding protein                                                                 |
| M5005_Spy_0569  | 3572354 | NE | Spy49_0576  | 6985589 | NC | sagH  | * |          |                                             | streptolysin S export transmembrane protein                                                               |
| M5005_Spy_0570  | 3572355 | NE | Spy49_0577  | 6985590 | C  | sagI  | * |          |                                             | streptolysin S export transmembrane protein                                                               |
| M5005_Spy_0571  | 3572356 | NE | Spy49_0578  | 6985591 | NE | -     | * |          |                                             | hypothetical protein M5005_Spy_0571                                                                       |
| M5005_Spy_0572  | 3572357 | NE | Spy49_0579  | 6985592 | NE | -     | * |          |                                             | hypothetical protein M5005_Spy_0572                                                                       |
| M5005_Spy_0573  | 3572319 | E  | Spy49_0580  | 6985593 | E  | ligA  | * | SSA_1484 |                                             | NAD-dependent DNA ligase LigA                                                                             |
| M5005_Spy_0574  | 3572320 | E  | Spy49_0581  | 6985594 | E  | -     | * |          |                                             | lipid kinase                                                                                              |
| M5005_Spy_0575  | 3572321 | NC | Spy49_0582  | 6985595 | NC | atpE  | * |          |                                             | ATP synthase F0F1 subunit C                                                                               |
| M5005_Spy_0576  | 3572322 | NC | Spy49_0583  | 6985596 | E  | atpB  | * | SSA_0783 | SP_1513                                     | ATP synthase F0F1 subunit A                                                                               |
| M5005_Spy_0577  | 3572323 | E  | Spy49_0584  | 6985597 | NC | atpF  | * | SSA_0784 | SP_1512                                     | ATP synthase F0F1 subunit B                                                                               |
| M5005_Spy_0578  | 3572324 | E  | Spy49_0585  | 6985598 | E  | atpH  | * | SSA_0785 | SP_1511                                     | ATP synthase F0F1 subunit delta                                                                           |
| M5005_Spy_0579  | 3572325 | E  | Spy49_0586  | 6985599 | E  | atpA  | * | SSA_0786 | SP_1510                                     | ATP synthase F0F1 subunit alpha                                                                           |



|                 |                         |    |             |                         |    |             |   |          |         |                                                        |
|-----------------|-------------------------|----|-------------|-------------------------|----|-------------|---|----------|---------|--------------------------------------------------------|
| M5005_Spy_0580  | <a href="#">3572326</a> | E  | Spy49_0587  | <a href="#">6985600</a> | E  | <b>atpG</b> | * | SSA_0787 | SP_1509 | ATP synthase F0F1 subunit gamma                        |
| M5005_Spy_0581  | <a href="#">3572327</a> | E  | Spy49_0588  | <a href="#">6985601</a> | E  | <b>atpD</b> | * | SSA_0788 | SP_1508 | ATP synthase F0F1 subunit beta                         |
| M5005_Spy_0582  | <a href="#">3572328</a> | NC | Spy49_0589  | <a href="#">6985602</a> | NC | atpC        | * |          |         | ATP synthase F0F1 subunit epsilon                      |
| M5005_Spy_0583  | <a href="#">3572329</a> | NE | Spy49_0590  | <a href="#">6985603</a> | NE | -           | * |          |         | hypothetical protein M5005_Spy_0583                    |
| M5005_Spy_0584  | <a href="#">3572330</a> | NE | Spy49_0591  | <a href="#">6985604</a> | NE | murA        | * |          |         | UDP-N-acetylglucosamine 1-carboxyvinyltransferase      |
| M5005_Spy_0585  | <a href="#">3572331</a> | NE |             |                         |    | epuA        | * |          |         | epuA protein                                           |
| M5005_Spy_0586  | <a href="#">3572332</a> | NE |             |                         |    | endA        | * |          |         | DNA-entry nuclease                                     |
|                 |                         |    | Spy49_0592  | <a href="#">6985605</a> | NE |             | * |          |         |                                                        |
| M5005_Spy_0587  | <a href="#">3572333</a> | E  | Spy49_0596  | <a href="#">6985608</a> | E  | <b>pheS</b> | * | SSA_0912 | SP_0579 | phenylalanyl-tRNA synthetase subunit alpha             |
| M5005_Spy_0588  | <a href="#">3572334</a> | E  | Spy49_0597  | <a href="#">6985609</a> | E  | <b>pheT</b> | * | SSA_0914 | SP_0581 | phenylalanyl-tRNA synthetase subunit beta              |
| M5005_Spy_0589  | <a href="#">3572335</a> | NE |             |                         |    | -           | * |          |         | salt-stress induced protein                            |
|                 |                         |    | Spy49_0598  | <a href="#">6985610</a> | NE |             | * |          |         |                                                        |
| M5005_Spy_0590  | <a href="#">3572336</a> | NE | Spy49_0599  | <a href="#">6985611</a> | NE | -           | * |          |         | hypothetical protein M5005_Spy_0590                    |
| M5005_Spy_0591  | <a href="#">3572337</a> | NE | Spy49_0600  | <a href="#">6985612</a> | NE | -           | * |          |         | ABC transporter permease                               |
| M5005_Spy_0592  | <a href="#">3572338</a> | NE | Spy49_0601  | <a href="#">6985613</a> | NE | -           | * |          |         | ABC transporter ATP-binding protein                    |
| M5005_Spy_0593c | <a href="#">3572300</a> | NE | Spy49_0602c | <a href="#">6985614</a> | NE | -           | * |          |         | neutral zinc metallopeptidase                          |
| M5005_Spy_0594  | <a href="#">3572301</a> | NC | Spy49_0603  | <a href="#">6985615</a> | C  | rexB        | * | SSA_1452 | SP_1151 | ATP-dependent nuclease subunit B                       |
| M5005_Spy_0595  | <a href="#">3572302</a> | C  | Spy49_0604  | <a href="#">6985616</a> | E  | rexA        | * |          | SP_1152 | ATP-dependent nuclease subunit A                       |
| M5005_Spy_0596  | <a href="#">3572303</a> | NE | Spy49_0605  | <a href="#">6985617</a> | NE | -           | * |          |         | arginine-binding protein                               |
| M5005_Spy_0597  | <a href="#">3572304</a> | E  | Spy49_0606  | <a href="#">6985618</a> | NC | rpsU        | * |          |         | 30S ribosomal protein S21                              |
| M5005_Spy_0598c | <a href="#">3572305</a> | NE | Spy49_0607c | <a href="#">6985619</a> | NE | mscL        | * |          |         | large-conductance mechanosensitive channel             |
| M5005_Spy_0599  | <a href="#">3572306</a> | E  | Spy49_0608  | <a href="#">6985620</a> | E  | dnaG        | * | SSA_0824 | SP_1072 | DNA primase                                            |
| M5005_Spy_0600  | <a href="#">3572307</a> | E  | Spy49_0609  | <a href="#">6985621</a> | E  | <b>rpoD</b> | * | SSA_0825 | SP_1073 | RNA polymerase sigma factor RpoD                       |
| M5005_Spy_0601  | <a href="#">3572308</a> | NE | Spy49_0610  | <a href="#">6985622</a> | NE | -           | * |          |         | hypothetical protein M5005_Spy_0601                    |
| M5005_Spy_0602  | <a href="#">3572309</a> | E  | Spy49_0611  | <a href="#">6985623</a> | E  | rmlD        | * |          |         | dTDP-4-dehydrothiamine reductase                       |
| M5005_Spy_0603  | <a href="#">3572310</a> | E  | Spy49_0612  | <a href="#">6985624</a> | E  | <b>rgpA</b> | * |          | SP_1366 | alpha-(1,2)-rhamnosyltransferase                       |
| M5005_Spy_0604  | <a href="#">3572311</a> | E  | Spy49_0613  | <a href="#">6985625</a> | E  | <b>rgpB</b> | * |          | SP_1365 | alpha-L-Rha alpha-1,3-L-rhamnosyltransferase           |
| M5005_Spy_0605  | <a href="#">3572312</a> | E  | Spy49_0614  | <a href="#">6985626</a> | E  | <b>rgpC</b> | * |          |         | polysaccharide export ABC transporter permease         |
| M5005_Spy_0606  | <a href="#">3572313</a> | E  | Spy49_0615  | <a href="#">6985627</a> | E  | <b>rgpD</b> | * |          |         | polysaccharide export ATP-binding protein              |
| M5005_Spy_0607  | <a href="#">3572314</a> | E  | Spy49_0617  | <a href="#">6985628</a> | E  | <b>rgpE</b> | * |          |         | glycosyltransferase                                    |
| M5005_Spy_0608  | <a href="#">3572315</a> | E  | Spy49_0618  | <a href="#">6985629</a> | E  | <b>rgpF</b> | * |          |         | alpha-L-Rha alpha-1,3-L-rhamnosyltransferase           |
| M5005_Spy_0609  | <a href="#">3572316</a> | NE | Spy49_0619  | <a href="#">6985630</a> | NE | -           | * |          |         | phosphoglycerol transferase                            |
| M5005_Spy_0610  | <a href="#">3572317</a> | NE | Spy49_0620  | <a href="#">6985631</a> | NE | -           | * |          |         | glycosyltransferase                                    |
| M5005_Spy_0611  | <a href="#">3572318</a> | NE | Spy49_0621  | <a href="#">6985632</a> | NE | -           | * |          |         | hypothetical protein M5005_Spy_0611                    |
| M5005_Spy_0612  | <a href="#">3572280</a> | C  | Spy49_0622  | <a href="#">6985633</a> | E  | amrA        | * | SSA_1738 |         | transcriptional activator                              |
| M5005_Spy_0613  | <a href="#">3572281</a> | E  | Spy49_0623  | <a href="#">6985634</a> | E  | -           | * |          |         | hypothetical protein M5005_Spy_0613                    |
| M5005_Spy_0614  | <a href="#">3572282</a> | NE | Spy49_0624  | <a href="#">6985635</a> | NE | pepT        | * |          |         | peptidase T                                            |
| M5005_Spy_0615  | <a href="#">3572283</a> | NE | Spy49_0625  | <a href="#">6985636</a> | NE | ebaA        | * |          |         | pore forming protein                                   |
| M5005_Spy_0616c | <a href="#">3572284</a> | NE | Spy49_0626c | <a href="#">6985637</a> | NE | -           | * |          |         | ferredoxin                                             |
| M5005_Spy_0617  | <a href="#">3572285</a> | NC | Spy49_0627  | <a href="#">6985638</a> | NE | -           | * |          |         | hypothetical protein M5005_Spy_0617                    |
| M5005_Spy_0618  | <a href="#">3572286</a> | C  | Spy49_0628  | <a href="#">6985639</a> | NC | cmk         | * |          | SP_1603 | cytidylate kinase                                      |
| M5005_Spy_0619  | <a href="#">3572287</a> | C  | Spy49_0629  | <a href="#">6985640</a> | E  | infC        | * | SSA_1500 | SP_0959 | translation initiation factor IF-3                     |
| M5005_Spy_0620  | <a href="#">3572288</a> | C  | Spy49_0630  | <a href="#">6985641</a> | NE | rpmI        | * |          | SP_0960 | 50S ribosomal protein L35                              |
| M5005_Spy_0621  | <a href="#">3572289</a> | NC | Spy49_0631  | <a href="#">6985642</a> | NC | rplT        | * |          |         | 50S ribosomal protein L20                              |
| M5005_Spy_0622c | <a href="#">3572290</a> | E  | Spy49_0632c | <a href="#">6985643</a> | E  | -           | * |          |         | phosphoglycerol transferase                            |
| M5005_Spy_0623  | <a href="#">3572291</a> | NE | Spy49_0633  | <a href="#">6985644</a> | NE | -           | * |          |         | methyltransferase                                      |
| M5005_Spy_0624  | <a href="#">3572292</a> | NE | Spy49_0634  | <a href="#">6985645</a> | NE | aroD        | * |          |         | 3-dehydroquinate dehydratase                           |
| M5005_Spy_0625  | <a href="#">3572293</a> | NE | Spy49_0635  | <a href="#">6985646</a> | NE | aroF        | * |          |         | chorismate synthase                                    |
| M5005_Spy_0626  | <a href="#">3572294</a> | NE | Spy49_0636  | <a href="#">6985647</a> | NE | -           | * |          |         | hypothetical protein M5005_Spy_0626                    |
| M5005_Spy_0627  | <a href="#">3572295</a> | NE | Spy49_0637  | <a href="#">6985648</a> | NE | gor         | * |          |         | glutathione reductase                                  |
| M5005_Spy_0628c | <a href="#">3572296</a> | NE | Spy49_0638c | <a href="#">6985649</a> | NE | folC.2      | * |          |         | folylpolyglutamate synthase/dihydrofolate synthase     |
| M5005_Spy_0629c | <a href="#">3572297</a> | NE | Spy49_0639c | <a href="#">6985650</a> | NE | -           | * |          |         | hypothetical protein M5005_Spy_0629                    |
| M5005_Spy_0630  | <a href="#">3572298</a> | NE | Spy49_0640  | <a href="#">6985651</a> | NE | nifS1       | * |          |         | cysteine desulfhydrase                                 |
| M5005_Spy_0631  | <a href="#">3572299</a> | NE | Spy49_0641  | <a href="#">6985652</a> | NE | thiI        | * |          |         | thiamine biosynthesis protein ThiI                     |
| M5005_Spy_0632  | <a href="#">3572261</a> | NE | Spy49_0642  | <a href="#">6985653</a> | NE | capA        | * |          |         | capsule biosynthesis protein                           |
| M5005_Spy_0633  | <a href="#">3572262</a> | NC | Spy49_0643  | <a href="#">6985654</a> | NC | rplU        | * |          |         | 50S ribosomal protein L21                              |
| M5005_Spy_0634  | <a href="#">3572263</a> | NC | Spy49_0644  | <a href="#">6985655</a> | NC | -           | * |          |         | hypothetical protein M5005_Spy_0634                    |
| M5005_Spy_0635  | <a href="#">3572264</a> | NC | Spy49_0645  | <a href="#">6985656</a> | NC | rpmA        | * |          |         | 50S ribosomal protein L27                              |
| M5005_Spy_0636  | <a href="#">3572265</a> | NE | Spy49_0646  | <a href="#">6985657</a> | NE | -           | * |          |         | LysR family transcriptional regulator                  |
| M5005_Spy_0637  | <a href="#">3572266</a> | NE | Spy49_0647  | <a href="#">6985658</a> | NE | lsp         | * |          |         | lipoprotein signal peptidase                           |
| M5005_Spy_0638  | <a href="#">3572267</a> | NE | Spy49_0648  | <a href="#">6985659</a> | NE | -           | * |          |         | ribosomal large subunit pseudouridine synthase D       |
|                 |                         |    | Spy49_0650  | <a href="#">6985660</a> | NE | pyrR        | * |          |         | bifunctional pyrimidine regulatory protein PyrR/uracil |
| M5005_Spy_0639  | <a href="#">3572268</a> | NE | Spy49_0651  | <a href="#">6985661</a> | NE | pyrP        | * |          |         | phosphoribosyltransferase                              |
| M5005_Spy_0640  | <a href="#">3572269</a> | NE | Spy49_0652  | <a href="#">6985662</a> | NE | pyrB        | * |          |         | uracil permease                                        |
| M5005_Spy_0641  | <a href="#">3572270</a> | NE | Spy49_0653  | <a href="#">6985663</a> | NC | carA        | * |          |         | aspartate carbamoyltransferase                         |
| M5005_Spy_0642  | <a href="#">3572271</a> | NE | Spy49_0654  | <a href="#">6985664</a> | NE | carB        | * |          |         | carbamoyl phosphate synthase small subunit             |
| M5005_Spy_0643  | <a href="#">3572272</a> | NE | Spy49_0655  | <a href="#">6985665</a> | NE | -           | * |          |         | carbamoyl phosphate synthase large subunit             |
| M5005_Spy_0644  | <a href="#">3572273</a> | NE | Spy49_0656  | <a href="#">6985666</a> | NE | -           | * |          |         | periplasmic protein of efflux system                   |
| M5005_Spy_0645  | <a href="#">3572274</a> | NE | Spy49_0657  | <a href="#">6985667</a> | NE | -           | * |          |         | ABC transporter ATP-binding protein                    |
| M5005_Spy_0646  | <a href="#">3572275</a> | NE | Spy49_0658  | <a href="#">6985668</a> | C  | -           | * |          |         | ABC transporter permease                               |
| M5005_Spy_0647  | <a href="#">3572276</a> | NE | Spy49_0659  | <a href="#">6985669</a> | E  | rpsP        | * | SSA_1310 | SP_0994 | glycerophosphoryl diester phosphodiesterase            |
| M5005_Spy_0648  | <a href="#">3572277</a> | NE | Spy49_0660  | <a href="#">6985670</a> | NC | -           | * |          | SP_0775 | 30S ribosomal protein S16                              |
| M5005_Spy_0649  | <a href="#">3572278</a> | NE | Spy49_0661  | <a href="#">6985671</a> | NE | -           | * |          |         | RNA binding protein                                    |
| M5005_Spy_0650  | <a href="#">3572279</a> | NC |             |                         |    | -           | * |          |         | hypothetical protein M5005_Spy_0650                    |
| M5005_Spy_0651  | <a href="#">3572241</a> | NE |             |                         |    | -           | * |          |         | cell surface protein                                   |
| M5005_Spy_0652  | <a href="#">3572242</a> | NE | Spy49_0662  | <a href="#">6985672</a> | NE | -           | * |          |         | hypothetical protein M5005_Spy_0652                    |
| M5005_Spy_0653c | <a href="#">3572243</a> | NE | Spy49_0663c | <a href="#">6985673</a> | NE | czcD        | * |          |         | cobalt-zinc-cadmium resistance protein                 |
| M5005_Spy_0654  | <a href="#">3572244</a> | NE | Spy49_0664  | <a href="#">6985674</a> | NE | -           | * |          |         | TetR family transcriptional regulator                  |
| M5005_Spy_0655  | <a href="#">3572245</a> | E  | Spy49_0665  | <a href="#">6985675</a> | NC | rimM        | * |          |         | 16S rRNA-processing protein RimM                       |
| M5005_Spy_0656  | <a href="#">3572246</a> | E  | Spy49_0667  | <a href="#">6985676</a> | E  | <b>trmD</b> | * | SSA_1302 | SP_0779 | tRNA (guanine-N(1)-)-methyltransferase                 |
| M5005_Spy_0657  | <a href="#">3572247</a> | NE | Spy49_0668  | <a href="#">6985677</a> | NE | trxB        | * |          |         | thioredoxin reductase                                  |
| M5005_Spy_0658  | <a href="#">3572248</a> | NE | Spy49_0669  | <a href="#">6985678</a> | NE | -           | * |          |         | regulatory protein                                     |
| M5005_Spy_0659  | <a href="#">3572249</a> | NE | Spy49_0671  | <a href="#">6985679</a> | NE | apbA        | * |          |         | 2-dehydropanoate 2-reductase                           |
| M5005_Spy_0660  | <a href="#">3572250</a> | NE | Spy49_0672  | <a href="#">6985680</a> | NE | fruR        | * |          |         | fructose repressor                                     |
| M5005_Spy_0661  | <a href="#">3572251</a> | NE | Spy49_0673  | <a href="#">6985681</a> | NE | fruB        | * |          |         | 1-phosphofruktokinase                                  |
| M5005_Spy_0662  | <a href="#">3572252</a> | NE | Spy49_0674  | <a href="#">6985682</a> | NE | fruA        | * |          |         | PTS system fructose-specific transporter subunit IIABC |
| M5005_Spy_0663  | <a href="#">3572253</a> | NE | Spy49_0675  | <a href="#">6985683</a> | NE | mur1.1      | * |          |         | autolysin                                              |
| M5005_Spy_0664  | <a href="#">3572254</a> | NE | Spy49_0676  | <a href="#">6985684</a> | NE | mur1.2      | * |          |         | autolysin                                              |
| M5005_Spy_0665c | <a href="#">3572255</a> | NE | Spy49_0677c | <a href="#">6985685</a> | NE | -           | * |          |         | transposase                                            |
| M5005_Spy_0666c | <a href="#">3572256</a> | NC | Spy49_0679  | <a href="#">6985687</a> | NE | -           | * |          |         | hypothetical protein M5005_Spy_0666                    |
| M5005_Spy_0667c | <a href="#">3572257</a> | NC |             |                         |    | -           | * |          |         | exotoxin type C                                        |
| M5005_Spy_0668c | <a href="#">3572258</a> | NE |             |                         |    | mac         | * |          |         | IgG-degrading protease                                 |
| M5005_Spy_0669  | <a href="#">3572259</a> | NC |             |                         |    | -           | * |          |         | phage protein                                          |
| M5005_Spy_0670  | <a href="#">3572260</a> | NE |             |                         |    | -           | * |          |         | nucleoside diphosphate kinase                          |
| M5005_Spy_0671  | <a href="#">3572222</a> | NE | Spy49_0680  | <a href="#">6985688</a> | NE | -           | * |          |         | transposase                                            |
| M5005_Spy_0672  | <a href="#">3572223</a> | NE | Spy49_0681  | <a href="#">6985689</a> | NE | -           | * |          |         | degV family protein                                    |
| M5005_Spy_0673  | <a href="#">3572224</a> | E  | Spy49_0682  | <a href="#">6985690</a> | E  | <b>papS</b> | * | SSA_1086 | SP_1554 | tRNA CCA-pyrophosphorylase                             |
| M5005_Spy_0674  | <a href="#">3572225</a> | NC | Spy49_0683  | <a href="#">6985691</a> | NE | -           | * |          |         | ABC transporter ATP-binding protein                    |
| M5005_Spy_0675  | <a href="#">3572226</a> | NC |             |                         |    | -           | * |          |         | hypothetical protein M5005_Spy_0675                    |
| M5005_Spy_0676  | <a href="#">3572227</a> | NE |             |                         |    | -           | * | </       |         |                                                        |

|                 |         |    |             |         |    |                   |   |          |         |                                                                           |
|-----------------|---------|----|-------------|---------|----|-------------------|---|----------|---------|---------------------------------------------------------------------------|
| M5005_Spy_0679  | 3572230 | NE | Spy49_0687  | 6985694 | NE | -                 | * |          |         | GTP pyrophosphokinase                                                     |
| M5005_Spy_0680  | 3572231 | NE | Spy49_0688  | 6985695 | NE | -                 | * |          |         | two-component response regulator                                          |
| M5005_Spy_0681  | 3572232 | NE | Spy49_0689  | 6985696 | NE | -                 | * |          |         | two-component system histidine kinase                                     |
| M5005_Spy_0682  | 3572233 | E  | Spy49_0690  | 6985697 | E  | <b>mvaK1</b>      | * | SSA_0333 | SP_0381 | mevalonate kinase                                                         |
| M5005_Spy_0683  | 3572234 | E  | Spy49_0691  | 6985698 | E  | <b>mvaD</b>       | * | SSA_0334 | SP_0382 | diphosphomevalonate decarboxylase                                         |
| M5005_Spy_0684  | 3572235 | NC | Spy49_0692  | 6985699 | E  | <b>mvaK2</b>      | * | SSA_0335 | SP_0383 | phosphomevalonate kinase                                                  |
| M5005_Spy_0685  | 3572236 | E  | Spy49_0693  | 6985700 | E  | -                 | * | SSA_0336 | SP_0384 | isopentenyl pyrophosphate isomerase                                       |
| M5005_Spy_0686c | 3572237 | C  | Spy49_0694c | 6985701 | E  | <b>mvaS1</b>      | * | SSA_0337 | SP_1726 | 3-hydroxy-3-methylglutaryl-CoA reductase                                  |
| M5005_Spy_0687c | 3572238 | E  | Spy49_0695c | 6985702 | E  | <b>mvaS2</b>      | * | SSA_0338 | SP_1727 | hydroxymethylglutaryl-CoA synthase                                        |
| M5005_Spy_0688  | 3572239 | NC | Spy49_0696  | 6985703 | C  | <b>thyA</b>       | * | SSA_1091 | SP_0669 | thymidylate synthase                                                      |
| M5005_Spy_0689  | 3572240 | E  | Spy49_0697  | 6985704 | E  | <b>dyr</b>        | * | SSA_1092 | SP_1571 | dihydrofolate reductase                                                   |
| M5005_Spy_0690  | 3572202 | NE | Spy49_0698  | 6985705 | NE | -                 | * |          |         | hypothetical protein M5005_Spy_0690                                       |
| M5005_Spy_0691  | 3572203 | NE | Spy49_0700  | 6985706 | NC | <b>clpX</b>       | * |          |         | ATP-dependent protease ATP-binding subunit ClpX                           |
| M5005_Spy_0692  | 3572204 | E  | Spy49_0701  | 6985707 | E  | <b>engB</b>       | * | SSA_1094 | SP_1568 | ribosome biogenesis GTP-binding protein YsxC                              |
| M5005_Spy_0693  | 3572205 | NE | Spy49_0702  | 6985708 | NE | -                 | * |          |         | hypothetical protein M5005_Spy_0693                                       |
| M5005_Spy_0694c | 3572206 | NE | Spy49_0703c | 6985709 | NE | <b>clpL</b>       | * |          |         | ATP-dependent protease ATP-binding subunit                                |
| M5005_Spy_0695  | 3572207 | C  | Spy49_0704  | 6985710 | NC | <b>rplA</b>       | * |          | SP_0828 | ribose-5-phosphate isomerase A                                            |
| M5005_Spy_0696  | 3572208 | NE | Spy49_0705  | 6985711 | NE | <b>deoB</b>       | * |          |         | phosphopentomutase                                                        |
| M5005_Spy_0697  | 3572209 | NE | Spy49_0706  | 6985712 | NE | <b>arsC</b>       | * |          |         | arsenate reductase                                                        |
| M5005_Spy_0698  | 3572210 | NC | Spy49_0707  | 6985713 | NE | <b>punA</b>       | * |          |         | purine nucleoside phosphorylase                                           |
| M5005_Spy_0699  | 3572211 | NE | Spy49_0708  | 6985714 | NE | <b>deoD</b>       | * |          |         | purine nucleoside phosphorylase                                           |
| M5005_Spy_0700  | 3572212 | NE | Spy49_0709  | 6985715 | NE | <b>cpsX</b>       | * |          |         | LyrR family transcriptional regulator                                     |
| M5005_Spy_0701c | 3572213 | NE | Spy49_0710c | 6985716 | NE | <b>cpsY</b>       | * |          |         | LysR family transcriptional regulator                                     |
| M5005_Spy_0702  | 3572214 | NE | Spy49_0711  | 6985717 | NE | -                 | * |          |         | hypothetical protein M5005_Spy_0702                                       |
| M5005_Spy_0703  | 3572215 | NE | Spy49_0712  | 6985718 | NE | <b>pyrF</b>       | * |          |         | orotidine 5'-phosphate decarboxylase                                      |
| M5005_Spy_0704  | 3572216 | NE | Spy49_0713  | 6985719 | NE | <b>pyrE</b>       | * |          |         | orotate phosphoribosyltransferase                                         |
| M5005_Spy_0705  | 3572217 | NE | Spy49_0714  | 6985720 | NE | <b>amiC</b>       | * |          |         | amidase                                                                   |
| M5005_Spy_0706  | 3572218 | NE | Spy49_0715  | 6985721 | NE | -                 | * |          |         | cystine-binding protein                                                   |
| M5005_Spy_0707  | 3572219 | NE | Spy49_0716  | 6985722 | NE | -                 | * |          |         | cystine transporter permease                                              |
| M5005_Spy_0708  | 3572220 | NE | Spy49_0717  | 6985723 | NE | <b>ung</b>        | * |          |         | uracil-DNA glycosylase                                                    |
| M5005_Spy_0709  | 3572221 | NE | Spy49_0718  | 6985724 | NE | <b>pyrC</b>       | * |          |         | dihydroorotase                                                            |
| M5005_Spy_0710c | 3572186 | E  | Spy49_0719c | 6985725 | E  | -                 | * | SSA_1233 | SP_0851 | glycerol-3-phosphate acyltransferase                                      |
| M5005_Spy_0711  | 3572187 | E  | Spy49_0720  | 6985726 | E  | <b>parE</b>       | * | SSA_1232 | SP_0852 | DNA topoisomerase IV subunit B                                            |
| M5005_Spy_0712  | 3572188 | E  | Spy49_0721  | 6985727 | E  | <b>parC</b>       | * | SSA_1226 | SP_0855 | DNA topoisomerase IV subunit A                                            |
| M5005_Spy_0713  | 3572189 | NE | Spy49_0722  | 6985728 | NE | <b>bcaT</b>       | * |          |         | branched-chain amino acid aminotransferase                                |
| M5005_Spy_0714  | 3572190 | NC | Spy49_0723  | 6985729 | NC | -                 | * |          |         | hypothetical protein M5005_Spy_0714                                       |
| M5005_Spy_0715  | 3572193 | E  | Spy49_0724  | 6985732 | E  | <b>rpsA</b>       | * | SSA_1223 | SP_0862 | 30S ribosomal protein S1                                                  |
| M5005_Spy_0716c | 3572195 | NE | Spy49_0725c | 6985734 | NE | -                 | * |          |         | hypothetical protein M5005_Spy_0716                                       |
| M5005_Spy_0717  | 3572196 | NE | Spy49_0726  | 6985735 | NE | -                 | * |          |         | hypothetical protein M5005_Spy_0717                                       |
| M5005_Spy_0718  | 3572197 | NE | Spy49_0727  | 6985736 | NE | -                 | * |          |         | hypothetical protein M5005_Spy_0718                                       |
| M5005_Spy_0719  | 3572198 | NE | -           | -       | -  | -                 | * |          |         | glutathione S-transferase                                                 |
| M5005_Spy_0720  | 3572199 | NE | Spy49_0728  | 6985737 | NE | -                 | * |          |         | exfoliative toxin                                                         |
| M5005_Spy_0721c | 3572200 | NC | Spy49_0729c | 6985738 | NE | -                 | * |          |         | hypothetical protein M5005_Spy_0721                                       |
| M5005_Spy_0722  | 3572201 | NE | Spy49_0730  | 6985739 | NE | <b>miaA</b>       | * |          |         | tRNA delta(2)-isopentenylpyrophosphate transferase                        |
| M5005_Spy_0723  | 3572166 | NE | Spy49_0731  | 6985740 | NE | <b>hflX</b>       | * |          |         | GTP-binding protein                                                       |
| M5005_Spy_0724  | 3572167 | NE | Spy49_0732  | 6985741 | NE | -                 | * |          |         | hypothetical protein M5005_Spy_0724                                       |
| M5005_Spy_0725  | 3572168 | E  | Spy49_0733  | 6985742 | E  | <b>elaC</b>       | * | SSA_1430 | SP_0674 | ribonuclease Z                                                            |
| M5005_Spy_0726  | 3572169 | NE | Spy49_0734  | 6985743 | NE | -                 | * |          |         | short chain dehydrogenase                                                 |
| M5005_Spy_0727  | 3572170 | NE | Spy49_0735  | 6985744 | NE | <b>recJ</b>       | * |          |         | single-stranded-DNA-specific exonuclease                                  |
| M5005_Spy_0728  | 3572171 | NE | Spy49_0736  | 6985745 | NE | <b>apt</b>        | * |          |         | adenine phosphoribosyltransferase                                         |
| M5005_Spy_0729  | 3572172 | NC | Spy49_0737  | 6985746 | E  | <b>dnaD</b>       | * | SSA_1419 | SP_1575 | DNA replication protein                                                   |
| M5005_Spy_0730  | 3572173 | NE | Spy49_0738  | 6985747 | NE | <b>nth</b>        | * |          |         | endonuclease III                                                          |
| M5005_Spy_0731  | 3572174 | E  | Spy49_0739  | 6985748 | E  | -                 | * |          |         | para-aminobenzoate synthase component I/anthranilate synthase component I |
| M5005_Spy_0732  | 3572175 | NE | Spy49_0740  | 6985749 | NE | -                 | * |          |         | NIF3-related protein                                                      |
| M5005_Spy_0733  | 3572176 | NE | Spy49_0741  | 6985750 | NE | -                 | * |          |         | glycine/D-amino acid oxidase                                              |
| M5005_Spy_0734  | 3572177 | E  | Spy49_0742  | 6985751 | E  | <b>cpsFO/rmlA</b> | * |          |         | glucose-1-phosphate thymidyllyltransferase                                |
| M5005_Spy_0735  | 3572178 | NC | Spy49_0744  | 6985752 | NC | <b>cpsFP/rmlC</b> | * |          |         | dTDP-4-dehydroharmose 3,5-epimerase                                       |
| M5005_Spy_0736  | 3572179 | E  | Spy49_0745  | 6985753 | E  | <b>cpsFQ/rmlB</b> | * |          |         | dTDP-glucose 4,6-dehydratase                                              |
|                 |         |    | Spy49_0746c | 6985754 | NE | -                 | * |          |         |                                                                           |
|                 |         |    | Spy49_0747c | 6985755 | NE | -                 | * |          |         |                                                                           |
|                 |         |    | Spy49_0748c | 6985756 | NE | -                 | * |          |         |                                                                           |
|                 |         |    | Spy49_0749c | 6985757 | C  | -                 | * |          |         |                                                                           |
|                 |         |    | Spy49_0750  | 6985758 | NC | -                 | * |          |         |                                                                           |
|                 |         |    | Spy49_0751c | 6985759 | NC | -                 | * |          |         |                                                                           |
|                 |         |    | Spy49_0752  | 6985760 | NC | -                 | * |          |         |                                                                           |
|                 |         |    | Spy49_0753  | 6985761 | NC | -                 | * |          |         |                                                                           |
|                 |         |    | Spy49_0754  | 6985762 | NC | -                 | * |          |         |                                                                           |
|                 |         |    | Spy49_0755  | 6985763 | NC | -                 | * |          |         |                                                                           |
|                 |         |    | Spy49_0756  | 6985764 | NE | -                 | * |          |         |                                                                           |
|                 |         |    | Spy49_0757  | 6985765 | NC | -                 | * |          |         |                                                                           |
|                 |         |    | Spy49_0759  | 6985766 | NC | -                 | * |          |         |                                                                           |
|                 |         |    | Spy49_0760  | 6985767 | NE | -                 | * |          |         |                                                                           |
|                 |         |    | Spy49_0761  | 6985768 | NE | -                 | * |          |         |                                                                           |
|                 |         |    | Spy49_0762  | 6985769 | NC | -                 | * |          |         |                                                                           |
|                 |         |    | Spy49_0763  | 6985770 | NC | -                 | * |          |         |                                                                           |
|                 |         |    | Spy49_0764  | 6985771 | NC | -                 | * |          |         |                                                                           |
|                 |         |    | Spy49_0765  | 6985772 | NC | -                 | * |          |         |                                                                           |
|                 |         |    | Spy49_0766  | 6985773 | NE | -                 | * |          |         |                                                                           |
|                 |         |    | Spy49_0767  | 6985774 | NE | -                 | * |          |         |                                                                           |
|                 |         |    | Spy49_0768  | 6985775 | NE | -                 | * |          |         |                                                                           |
|                 |         |    | Spy49_0769  | 6985776 | NE | -                 | * |          |         |                                                                           |
|                 |         |    | Spy49_0770  | 6985777 | NE | -                 | * |          |         |                                                                           |
|                 |         |    | Spy49_0771  | 6985778 | NE | -                 | * |          |         |                                                                           |
|                 |         |    | Spy49_0772  | 6985779 | NE | -                 | * |          |         |                                                                           |
|                 |         |    | Spy49_0773  | 6985780 | NC | -                 | * |          |         |                                                                           |
|                 |         |    | Spy49_0774  | 6985781 | NE | -                 | * |          |         |                                                                           |
|                 |         |    | Spy49_0775  | 6985782 | NE | -                 | * |          |         |                                                                           |
|                 |         |    | Spy49_0776  | 6985783 | NE | -                 | * |          |         |                                                                           |
|                 |         |    | Spy49_0777  | 6985784 | NE | -                 | * |          |         |                                                                           |
|                 |         |    | Spy49_0778  | 6985785 | NC | -                 | * |          |         |                                                                           |
|                 |         |    | Spy49_0779  | 6985786 | C  | -                 | * |          |         |                                                                           |
|                 |         |    | Spy49_0780  | 6985787 | NC | -                 | * |          |         |                                                                           |
|                 |         |    | Spy49_0781  | 6985788 | NE | -                 | * |          |         |                                                                           |
|                 |         |    | Spy49_0782  | 6985789 | NC | -                 | * |          |         |                                                                           |
|                 |         |    | Spy49_0783  | 6985790 | NE | -                 | * |          |         |                                                                           |
|                 |         |    | Spy49_0784  | 6985791 | NC | -                 | * |          |         |                                                                           |
|                 |         |    | Spy49_0785  | 6985792 | NC | -                 | * |          |         |                                                                           |
|                 |         |    | Spy49_0786  | 6985793 | NC | -                 | * |          |         |                                                                           |
|                 |         |    | Spy49_0788  | 6985794 | NE | -                 | * |          |         |                                                                           |
|                 |         |    | Spy49_0789  | 6985795 | NE | -                 | * |          |         |                                                                           |
|                 |         |    | Spy49_0790  | 6985796 | NE | -                 | * |          |         |                                                                           |

|                 |         |    |             |         |    |           |   |          |         |                                                                      |
|-----------------|---------|----|-------------|---------|----|-----------|---|----------|---------|----------------------------------------------------------------------|
|                 |         |    | Spy49_0791  | 6985797 | NE |           |   |          |         |                                                                      |
|                 |         |    | Spy49_0792  | 6985798 | NE | speH      |   |          |         |                                                                      |
| M5005_Spy_0737  | 3572180 | NE | Spy49_0793  | 6985799 | NE | mutX      | * |          |         | 7,8-dihydro-8-oxoguanine-triphosphatase                              |
| M5005_Spy_0738  | 3572181 | NE | Spy49_0794  | 6985800 | NE | -         | * |          |         | hypothetical protein M5005_Spy_0738                                  |
| M5005_Spy_0739  | 3572182 | NE | Spy49_0795  | 6985801 | NE | -         | * |          |         | hypothetical protein M5005_Spy_0739                                  |
| M5005_Spy_0740c | 3572183 | NE | Spy49_0796c | 6985802 | NE | fbp       | * |          |         | fibronectin-binding protein                                          |
| M5005_Spy_0742  | 3572185 | NC |             |         |    | -         |   |          |         | hypothetical protein M5005_Spy_0742                                  |
| M5005_Spy_0743  | 3572147 | NE | Spy49_0797  | 6985803 | NE | -         | * |          |         | ABC transporter substrate-binding protein                            |
| M5005_Spy_0744  | 3572148 | NC | Spy49_0798  | 6985804 | NC | -         |   |          |         | hypothetical protein M5005_Spy_0744                                  |
| M5005_Spy_0745  | 3572149 | NE | Spy49_0799  | 6985805 | NE | -         | * |          |         | ABC transporter permease                                             |
| M5005_Spy_0746  | 3572150 | NE | Spy49_0800  | 6985806 | NE | -         | * |          |         | ABC transporter ATP-binding protein                                  |
| M5005_Spy_0747  | 3572151 | E  | Spy49_0801  | 6985807 | E  | -         | * | SSA_0312 | SP_0121 | Zn-dependent hydrolase                                               |
| M5005_Spy_0748  | 3572152 | NE | Spy49_0803  | 6985808 | NE | estA      | * |          |         | acetyl esterase                                                      |
| M5005_Spy_0749  | 3572153 | NE | Spy49_0804  | 6985809 | NE | -         | * |          |         | hypothetical protein M5005_Spy_0749                                  |
| M5005_Spy_0750  | 3572154 | NE | Spy49_0805  | 6985810 | NE | -         | * |          |         | ABC transporter ATP-binding protein                                  |
| M5005_Spy_0751  | 3572155 | NE | Spy49_0807  | 6985811 | NE | acoA      | * |          |         | pyruvate dehydrogenase E1 component subunit alpha                    |
| M5005_Spy_0752  | 3572156 | NE | Spy49_0808  | 6985812 | NE | acoB      | * |          |         | pyruvate dehydrogenase E1 component subunit beta                     |
| M5005_Spy_0753  | 3572157 | NE | Spy49_0809  | 6985813 | NE | acoC      | * |          |         | branched-chain alpha-keto acid dehydrogenase subunit E2              |
| M5005_Spy_0754c | 3572158 | NE |             |         |    | -         |   |          |         | hypothetical protein M5005_Spy_0754                                  |
| M5005_Spy_0755  | 3572159 | NE | Spy49_0810  | 6985814 | NE | acoL      | * |          |         | dihydropolamide dehydrogenase                                        |
| M5005_Spy_0756c | 3572160 | NE |             |         |    | -         |   |          |         | hypothetical protein M5005_Spy_0756                                  |
| M5005_Spy_0757c | 3572161 | NE | Spy49_0811c | 6985815 | NE | hylA      | * |          |         | hyaluronate lyase                                                    |
| M5005_Spy_0758  | 3572162 | NE | Spy49_0812  | 6985816 | NE | lplB      | * |          |         | lipote-protein ligase A                                              |
| M5005_Spy_0759c | 3572163 | E  | Spy49_0813c | 6985817 | E  | cobQ      | * | SSA_0800 | SP_1590 | hypothetical protein M5005_Spy_0759                                  |
| M5005_Spy_0760c | 3572164 | E  | Spy49_0814c | 6985818 | E  | murC2     | * | SSA_0801 | SP_1589 | UDP-N-acetylmuramoylalanyl-D-glutamate--2,6-diaminopimelate ligase   |
| M5005_Spy_0761  | 3572165 | E  | Spy49_0815  | 6985819 | E  | -         | * |          |         | hypothetical protein M5005_Spy_0761                                  |
| M5005_Spy_0762  | 3572127 | NE | Spy49_0816  | 6985820 | NE | -         | * |          |         | hypothetical protein M5005_Spy_0762                                  |
| M5005_Spy_0763  | 3572128 | E  | Spy49_0817  | 6985821 | E  | glmM      | * | SSA_0804 | SP_1559 | phosphoglucosamine mutase                                            |
| M5005_Spy_0764  | 3572129 | NE | Spy49_0818  | 6985822 | NE | -         | * |          |         | hypothetical protein M5005_Spy_0764                                  |
| M5005_Spy_0765  | 3572130 | NE | Spy49_0819  | 6985823 | NE | hemN      | * |          |         | coproporphyrinogen III oxidase                                       |
| M5005_Spy_0766  | 3572131 | C  | Spy49_0820  | 6985824 | E  | -         | * |          |         | acyl-ACP thioesterase                                                |
| M5005_Spy_0767  | 3572132 | NE | Spy49_0821  | 6985825 | NE | -         | * |          |         | 4-nitrophenylphosphatase                                             |
| M5005_Spy_0768  | 3572133 | NE | Spy49_0822  | 6985826 | NE | -         | * |          |         | hypothetical protein M5005_Spy_0768                                  |
| M5005_Spy_0769  | 3572134 | NE | Spy49_0823  | 6985827 | NE | cas9      | * |          |         | hypothetical protein M5005_Spy_0769                                  |
| M5005_Spy_0770  | 3572135 | NE | Spy49_0825  | 6985828 | NE | cas1      | * |          |         | hypothetical protein M5005_Spy_0770                                  |
| M5005_Spy_0771  | 3572136 | NE | Spy49_0826  | 6985829 | NE | cas2      | * |          |         | hypothetical protein M5005_Spy_0771                                  |
| M5005_Spy_0772  | 3572137 | NE | Spy49_0827  | 6985830 | NE | csn2      | * |          |         | hypothetical protein M5005_Spy_0772                                  |
| M5005_Spy_0773c | 3572138 | NE |             |         |    | -         |   |          |         | hypothetical protein M5005_Spy_0773                                  |
| M5005_Spy_0774  | 3572139 | NE |             |         |    | -         |   |          |         | nucleoside diphosphate kinase                                        |
| M5005_Spy_0775  | 3572140 | NC | Spy49_0828  | 6985831 | NE | -         | * |          |         | nucleoside diphosphate kinase                                        |
| M5005_Spy_0776  | 3572141 | NE | Spy49_0829  | 6985832 | NE | lepA      | * |          |         | GTP-binding protein LepA                                             |
| M5005_Spy_0777  | 3572142 | NE | Spy49_0830  | 6985833 | NC | scfB      | * |          |         | hypothetical protein M5005_Spy_0777                                  |
| M5005_Spy_0778  | 3572143 | NE | Spy49_0831  | 6985834 | NE | msrB/crsA | * |          |         | methionine sulfoxide reductase B                                     |
| M5005_Spy_0779  | 3572144 | NE | Spy49_0832  | 6985835 | NE | -         | * |          |         | hypothetical protein M5005_Spy_0779                                  |
| M5005_Spy_0780  | 3572145 | NE | Spy49_0833  | 6985836 | NE | -         | * |          |         | PTS system mannose/fructose family transporter subunit IIA           |
| M5005_Spy_0781  | 3572146 | NE | Spy49_0834  | 6985837 | NC | ptsB      | * |          |         | PTS system mannose/fructose family transporter subunit IIB           |
| M5005_Spy_0782  | 3572108 | NE | Spy49_0835  | 6985838 | NE | ptsC      | * |          |         | PTS system mannose/fructose family transporter subunit IIC           |
| M5005_Spy_0783  | 3572109 | NE | Spy49_0836  | 6985839 | NE | ptsD      | * |          |         | PTS system mannose/fructose family transporter subunit IID           |
| M5005_Spy_0784  | 3572110 | NE | Spy49_0837  | 6985840 | NE | -         | * |          |         | two-component sensor kinase                                          |
| M5005_Spy_0785  | 3572111 | NE | Spy49_0839  | 6985841 | NE | -         | * |          |         | two-component response regulator                                     |
| M5005_Spy_0786  | 3572112 | NE | Spy49_0840  | 6985842 | NE | -         | * |          |         | iron(III)-binding protein                                            |
| M5005_Spy_0787  | 3572113 | NE |             |         |    | -         |   |          |         | hypothetical protein M5005_Spy_0787                                  |
| M5005_Spy_0788  | 3572114 | NE |             |         |    | -         |   |          |         | acetyltransferase                                                    |
| M5005_Spy_0789  | 3572115 | NE |             |         |    | -         |   |          |         | HAD superfamily hydrolase                                            |
| M5005_Spy_0790  | 3572116 | NE | Spy49_0841  | 6985843 | NE | gabD      | * |          |         | succinate-semialdehyde dehydrogenase                                 |
| M5005_Spy_0791  | 3572117 | NE | Spy49_0842  | 6985844 | NE | uvrC      | * |          |         | excinuclease ABC subunit C                                           |
| M5005_Spy_0792  | 3572118 | NE | Spy49_0843  | 6985845 | NE | -         | * |          |         | NAD(P)H-dependent quinone reductase                                  |
| M5005_Spy_0793  | 3572119 | NE | Spy49_0844  | 6985846 | NE | -         | * |          |         | dipeptidase PepV                                                     |
| M5005_Spy_0794c | 3572120 | C  | Spy49_0845c | 6985847 | E  | trmE      | * |          | SP_1016 | tRNA modification GTPase TrmE                                        |
| M5005_Spy_0795  | 3572121 | NE | Spy49_0846  | 6985848 | NE | rplJ      | * |          |         | 50S ribosomal protein L10                                            |
|                 |         |    | Spy49_0847  | 6985849 | NC | -         |   |          |         |                                                                      |
| M5005_Spy_0796  | 3572122 | NE | Spy49_0848  | 6985850 | NC | rplL      | * |          |         | 50S ribosomal protein L7/L12                                         |
| M5005_Spy_0797  | 3572123 | NC |             |         |    | -         |   |          |         | hypothetical protein M5005_Spy_0797                                  |
| M5005_Spy_0798  | 3572124 | NE |             |         |    | -         |   |          |         | IFN-response binding factor 1                                        |
| M5005_Spy_0799  | 3572125 | NC |             |         |    | -         |   |          |         | hypothetical protein M5005_Spy_0799                                  |
| M5005_Spy_0800  | 3572126 | NE |             |         |    | -         |   |          |         | DNA-cytosine methyltransferase                                       |
| M5005_Spy_0801  | 3572088 | NC |             |         |    | -         |   |          |         | relaxase                                                             |
| M5005_Spy_0802  | 3572089 | NE |             |         |    | -         |   |          |         | relaxase                                                             |
| M5005_Spy_0803  | 3572090 | NE |             |         |    | srtI      | * |          |         | antibiotic production protein                                        |
| M5005_Spy_0804  | 3572091 | NE |             |         |    | srtR      | * |          |         | nisin biosynthesis two-component response regulator                  |
| M5005_Spy_0805  | 3572092 | NE |             |         |    | srtK      | * |          |         | nisin biosynthesis sensor protein                                    |
| M5005_Spy_0806  | 3572093 | NC |             |         |    | srtA      | * |          |         | antibiotic protein                                                   |
| M5005_Spy_0807  | 3572094 | NE |             |         |    | srtT      | * |          |         | antibiotic ABC transporter ATP-binding protein                       |
| M5005_Spy_0808  | 3572095 | NE |             |         |    | srtF      | * |          |         | antibiotic ABC transporter ATP-binding protein                       |
| M5005_Spy_0809  | 3572096 | NE |             |         |    | srtE      | * |          |         | antibiotic transport permease                                        |
| M5005_Spy_0810  | 3572097 | NE |             |         |    | srtG      | * |          |         | antibiotic transport permease                                        |
| M5005_Spy_0811  | 3572098 | NE |             |         |    | -         |   |          |         | Cro/Ci family transcriptional regulator                              |
| M5005_Spy_0812c | 3572099 | NE |             |         |    | -         |   |          |         | hypothetical protein M5005_Spy_0812                                  |
| M5005_Spy_0817  | 3572104 | NE | Spy49_0849  | 6985851 | NE | dacA1     | * |          |         | D-alanyl-D-alanine carboxypeptidase                                  |
| M5005_Spy_0818c | 3572105 | NE | Spy49_0850c | 6985852 | NE | -         | * |          |         | polysaccharide deacetylase                                           |
| M5005_Spy_0819  | 3572106 | NC |             |         |    | -         |   |          |         | hypothetical protein M5005_Spy_0819                                  |
| M5005_Spy_0820  | 3572107 | E  | Spy49_0851  | 6985853 | E  | folC.1    | * | SSA_0198 | SP_0290 | folylpolyglutamate synthase/dihydrofolate synthase                   |
| M5005_Spy_0821  | 3572069 | NE | Spy49_0852  | 6985854 | NE | folE      | * |          |         | GTP cyclohydrolase I                                                 |
| M5005_Spy_0822  | 3572070 | C  | Spy49_0853  | 6985855 | NC | folP      | * | SSA_0197 |         | dihydropterolate synthase                                            |
| M5005_Spy_0823  | 3572071 | NE | Spy49_0854  | 6985856 | NE | folQ      | * |          |         | dihydroonepterin aldolase                                            |
| M5005_Spy_0824  | 3572072 | NC | Spy49_0855  | 6985857 | NE | folK      | * |          |         | 2-amino-4-hydroxy-6-hydroxymethylidihydropteridine pyrophosphokinase |
| M5005_Spy_0825  | 3572073 | E  | Spy49_0856  | 6985858 | E  | murB      | * | SSA_1047 |         | UDP-N-acetylenolpyruvylglucosamine reductase                         |
| M5005_Spy_0826  | 3572074 | NE | Spy49_0857  | 6985859 | NE | potA      | * |          |         | spermidine/putrescine transporter ATP-binding protein                |
| M5005_Spy_0827  | 3572075 | NE | Spy49_0858  | 6985860 | NE | potB      | * |          |         | spermidine/putrescine transporter permease                           |
| M5005_Spy_0828  | 3572076 | NE | Spy49_0859  | 6985861 | NE | potC      | * |          |         | spermidine/putrescine transporter permease                           |
| M5005_Spy_0829  | 3572077 | NE | Spy49_0860  | 6985862 | NE | potD      | * |          |         | spermidine/putrescine-binding protein                                |
| M5005_Spy_0830c | 3572078 | NE | Spy49_0861c | 6985863 | NE | dpiA      | * |          |         | transcriptional regulatory protein                                   |
| M5005_Spy_0831c | 3572079 | NE | Spy49_0862c | 6985864 | NE | dpiB      | * |          |         | sensor kinase                                                        |
| M5005_Spy_0832  | 3572080 | NE | Spy49_0863  | 6985865 | NE | malP      | * |          |         | malate-sodium symport                                                |
| M5005_Spy_0833  | 3572081 | NE | Spy49_0864  | 6985866 | NE | -         | * |          |         | NAD-dependent malic enzyme                                           |
| M5005_Spy_0834c | 3572082 | NE | Spy49_0865c | 6985867 | NE | -         | * |          |         | Zn-dependent alcohol dehydrogenase and related dehydrogenase         |
| M5005_Spy_0835  | 3572083 | NE | Spy49_0866  | 6985868 | NE | aphA      | * |          |         | class B acid phosphatase                                             |
| M5005_Spy_0837  | 3572085 | NE | Spy49_0867  | 6985869 | NE | -         | * |          |         | chloride channel protein                                             |
| M5005_Spy_0838  | 3572086 | NE | Spy49_0868  | 6985870 | NE | -         | * |          |         | lipase/acylhydrolase                                                 |
| M5005_Spy_0839  | 3572087 | NE | Spy49_0869  | 6985871 | NE | -         | * |          |         | hypothetical protein M5005_Spy_0839                                  |
| M5005_Spy_0840  | 3572049 | NE | Spy49_0870  | 6985872 | NE | radC      | * |          |         | DNA repair protein RadC                                              |
| M5005_Spy_0841c | 3572050 | NE | Spy49_0871c | 6985873 | NE | -         | * |          |         | glutamine amidotransferase, class I                                  |

|                 |                         |    |             |                         |    |               |   |          |         |                                                                   |
|-----------------|-------------------------|----|-------------|-------------------------|----|---------------|---|----------|---------|-------------------------------------------------------------------|
| M5005_Spy_0842c | <a href="#">3572051</a> | NE | Spy49_0872c | <a href="#">6985874</a> | NE | -             | * |          |         | redox-sensing transcriptional repressor Rex                       |
| M5005_Spy_0843c | <a href="#">3572052</a> | NE | Spy49_0873c | <a href="#">6985875</a> | NE | -             | * |          |         | hypothetical protein M5005_Spy_0843                               |
| M5005_Spy_0844c | <a href="#">3572053</a> | E  | Spy49_0874c | <a href="#">6985876</a> | E  | <b>nifs2</b>  | * | SSA_1213 | SP_1094 | cysteine desulfhydrase                                            |
| M5005_Spy_0845c | <a href="#">3572054</a> | NE | Spy49_0875c | <a href="#">6985877</a> | NE | prs           | * |          |         | ribose-phosphate pyrophosphokinase                                |
| M5005_Spy_0846c | <a href="#">3572055</a> | NE | Spy49_0876c | <a href="#">6985878</a> | NC | -             | * |          |         | adenylate cyclase                                                 |
| M5005_Spy_0847  | <a href="#">3572056</a> | NE | Spy49_0877  | <a href="#">6985879</a> | NE | -             | * |          |         | GTP pyrophosphokinase                                             |
| M5005_Spy_0848  | <a href="#">3572057</a> | E  | Spy49_0878  | <a href="#">6985880</a> | E  | <b>ppnK</b>   | * | SSA_1209 | SP_1098 | inorganic polyphosphate/ATP-NAD kinase                            |
| M5005_Spy_0849  | <a href="#">3572058</a> | NE | Spy49_0879  | <a href="#">6985881</a> | NE | rluD          | * |          |         | ribosomal large subunit pseudouridine synthase D                  |
| M5005_Spy_0851  | <a href="#">3572060</a> | NE | Spy49_0880  | <a href="#">6985882</a> | NE | pta/eutD      | * |          |         | phosphotransacylase                                               |
| M5005_Spy_0852  | <a href="#">3572061</a> | NE | Spy49_0881  | <a href="#">6985883</a> | NE | -             | * |          |         | short chain dehydrogenase                                         |
| M5005_Spy_0853  | <a href="#">3572062</a> | NC |             |                         |    | -             | * |          |         | short chain dehydrogenase                                         |
| M5005_Spy_0854c | <a href="#">3572063</a> | NE | Spy49_0882c | <a href="#">6985884</a> | NE | -             | * |          |         | Na+ driven multidrug efflux pump                                  |
| M5005_Spy_0855  | <a href="#">3572064</a> | NE | Spy49_0883  | <a href="#">6985885</a> | NE | proV          | * |          |         | glycine betaine transport ATP-binding protein                     |
| M5005_Spy_0856  | <a href="#">3572065</a> | NE | Spy49_0884  | <a href="#">6985886</a> | NE | proX          | * |          |         | glycine betaine transporter permease                              |
| M5005_Spy_0857  | <a href="#">3572066</a> | NE | Spy49_0885  | <a href="#">6985887</a> | NE | guaC          | * |          |         | guanosine 5'-monophosphate oxidoreductase                         |
|                 |                         |    | Spy49_0886c | <a href="#">6985888</a> | NE | -             | * |          |         |                                                                   |
| M5005_Spy_0858  | <a href="#">3572067</a> | NE | Spy49_0887  | <a href="#">6985889</a> | NE | xpt           | * |          |         | xanthine phosphoribosyltransferase                                |
| M5005_Spy_0859  | <a href="#">3572068</a> | NE | Spy49_0888  | <a href="#">6985890</a> | NE | -             | * |          |         | xanthine permease                                                 |
| M5005_Spy_0860c | <a href="#">3572030</a> | NE | Spy49_0891c | <a href="#">6985891</a> | NE | apbE          | * |          |         | thiamine biosynthesis lipoprotein                                 |
| M5005_Spy_0861c | <a href="#">3572031</a> | NE | Spy49_0892c | <a href="#">6985892</a> | NE | -             | * |          |         | 4-oxalocrotonate tautomerase                                      |
| M5005_Spy_0862  | <a href="#">3572032</a> | NE | Spy49_0893  | <a href="#">6985893</a> | NE | tdk2          | * |          |         | thymidine kinase                                                  |
| M5005_Spy_0863  | <a href="#">3572033</a> | E  | Spy49_0894  | <a href="#">6985894</a> | E  | <b>prfA</b>   | * | SSA_1152 | SP_1020 | peptide chain release factor 1                                    |
| M5005_Spy_0864  | <a href="#">3572034</a> | NE | Spy49_0895  | <a href="#">6985895</a> | NC | hemK          | * |          |         | peptide release factor-glutamine N5-methyltransferase             |
| M5005_Spy_0865  | <a href="#">3572035</a> | NC | Spy49_0896  | <a href="#">6985896</a> | E  | -             | * |          |         | SUA5 protein                                                      |
| M5005_Spy_0866  | <a href="#">3572036</a> | NE | Spy49_0897  | <a href="#">6985897</a> | NE | -             | * |          |         | phosphinothricin N-acetyltransferase                              |
| M5005_Spy_0867  | <a href="#">3572037</a> | NE | Spy49_0898  | <a href="#">6985898</a> | NE | glyA          | * |          |         | serine hydroxymethyltransferase                                   |
| M5005_Spy_0868  | <a href="#">3572038</a> | NE | Spy49_0899  | <a href="#">6985899</a> | NC | -             | * |          |         | hypothetical protein M5005_Spy_0868                               |
| M5005_Spy_0869  | <a href="#">3572039</a> | NE |             |                         |    | -             | * |          |         | hypothetical protein M5005_Spy_0869                               |
|                 |                         |    | Spy49_0900  | <a href="#">6985900</a> | NE | -             | * |          |         |                                                                   |
| M5005_Spy_0870  | <a href="#">3572040</a> | NE | Spy49_0901  | <a href="#">6985901</a> | NC | -             | * |          |         | multidrug resistance ABC transporter ATP-binding protein/permease |
| M5005_Spy_0871  | <a href="#">3572041</a> | NE | Spy49_0902  | <a href="#">6985902</a> | NE | -             | * |          |         | multidrug resistance ABC transporter ATP-binding protein/permease |
| M5005_Spy_0872  | <a href="#">3572042</a> | NE | Spy49_0903  | <a href="#">6985903</a> | NE | nox           | * |          |         | NADH oxidase H2O-forming                                          |
| M5005_Spy_0873c | <a href="#">3572043</a> | NE | Spy49_0904c | <a href="#">6985904</a> | C  | ldh           | * |          |         | L-lactate dehydrogenase                                           |
| M5005_Spy_0874  | <a href="#">3572044</a> | E  | Spy49_0905  | <a href="#">6985905</a> | E  | <b>gyrA</b>   | * | SSA_1220 | SP_1219 | DNA gyrase subunit A                                              |
| M5005_Spy_0875  | <a href="#">3572045</a> | E  | Spy49_0906  | <a href="#">6985906</a> | C  | -             | * |          |         | sortase                                                           |
| M5005_Spy_0876  | <a href="#">3572046</a> | NE | Spy49_0907  | <a href="#">6985907</a> | C  | -             | * |          |         | lactoylglutathione lyase                                          |
| M5005_Spy_0877  | <a href="#">3572047</a> | NC | Spy49_0908  | <a href="#">6985908</a> | NE | -             | * |          |         | hypothetical protein M5005_Spy_0877                               |
| M5005_Spy_0878  | <a href="#">3572048</a> | NE |             |                         |    | -             | * |          |         | hypothetical protein M5005_Spy_0878                               |
| M5005_Spy_0879c | <a href="#">3572010</a> | NE | Spy49_0909c | <a href="#">6985909</a> | NE | -             | * |          |         | hypothetical protein M5005_Spy_0879                               |
| M5005_Spy_0880c | <a href="#">3572011</a> | C  | Spy49_0910c | <a href="#">6985910</a> | E  | <b>hlyIII</b> | * |          |         | hypothetical protein M5005_Spy_0880                               |
| M5005_Spy_0881c | <a href="#">3572012</a> | NE | Spy49_0911c | <a href="#">6985911</a> | NE | -             | * |          |         | hypothetical protein M5005_Spy_0881                               |
| M5005_Spy_0882  | <a href="#">3572013</a> | E  | Spy49_0912  | <a href="#">6985912</a> | E  | <b>rbgA</b>   | * | SSA_1189 | SP_1155 | ribosomal biogenesis GTPase                                       |
| M5005_Spy_0883  | <a href="#">3572014</a> | NE | Spy49_0913  | <a href="#">6985913</a> | NE | rmhB          | * |          |         | ribonuclease HII                                                  |
| M5005_Spy_0884  | <a href="#">3572015</a> | NE | Spy49_0914  | <a href="#">6985914</a> | NE | smf           | * |          |         | hypothetical protein M5005_Spy_0884                               |
| M5005_Spy_0885  | <a href="#">3572016</a> | C  | Spy49_0915  | <a href="#">6985915</a> | E  | <b>topA</b>   | * | SSA_1184 | SP_1263 | DNA topoisomerase I                                               |
| M5005_Spy_0886c | <a href="#">3572017</a> | NE | Spy49_0916c | <a href="#">6985916</a> | NE | -             | * |          |         | LysR family transcriptional regulator                             |
| M5005_Spy_0887c | <a href="#">3572018</a> | NC | Spy49_0917c | <a href="#">6985917</a> | NC | -             | * |          |         | LysR family transcriptional regulator                             |
| M5005_Spy_0888c | <a href="#">3572019</a> | NC |             |                         |    | -             | * |          |         | LysR family transcriptional regulator                             |
| M5005_Spy_0889  | <a href="#">3572020</a> | NE | Spy49_0918  | <a href="#">6985918</a> | NE | -             | * |          |         | regulatory protein (pfoS/R)                                       |
| M5005_Spy_0890  | <a href="#">3572021</a> | NE | Spy49_0919  | <a href="#">6985919</a> | NE | ddh           | * |          |         | D-lactate dehydrogenase                                           |
| M5005_Spy_0891  | <a href="#">3572022</a> | E  | Spy49_0920  | <a href="#">6985920</a> | E  | <b>satD</b>   | * |          |         | hypothetical protein M5005_Spy_0891                               |
| M5005_Spy_0892  | <a href="#">3572023</a> | NE | Spy49_0921  | <a href="#">6985921</a> | NE | satE          | * |          |         | hypothetical protein M5005_Spy_0892                               |
| M5005_Spy_0893  | <a href="#">3572024</a> | NC | Spy49_0922  | <a href="#">6985922</a> | NC | gid           | * |          |         | tRNA (uacil-5)-methyltransferase Gid                              |
| M5005_Spy_0894  | <a href="#">3572025</a> | NE | Spy49_0923  | <a href="#">6985923</a> | NE | oadA2         | * |          |         | oxaloacetate decarboxylase                                        |
| M5005_Spy_0895  | <a href="#">3572026</a> | NE | Spy49_0924  | <a href="#">6985924</a> | NE | -             | * |          |         | hypothetical protein M5005_Spy_0895                               |
| M5005_Spy_0896  | <a href="#">3572027</a> | NE | Spy49_0925  | <a href="#">6985925</a> | NE | -             | * |          |         | biotin carboxyl carrier protein of oxaloacetate decarboxylase     |
| M5005_Spy_0897  | <a href="#">3572028</a> | NE | Spy49_0926  | <a href="#">6985926</a> | NC | -             | * |          |         | oxaloacetate decarboxylase subunit beta                           |
| M5005_Spy_0898c | <a href="#">3572029</a> | NE | Spy49_0927c | <a href="#">6985927</a> | NE | -             | * |          |         | 2-(5'-triphosphoribosyl)-3'-dephosphocoenzyme-A synthase          |
| M5005_Spy_0899c | <a href="#">3571991</a> | NE | Spy49_0928c | <a href="#">6985928</a> | NE | citG          | * |          |         | GntR family transcriptional regulator                             |
| M5005_Spy_0900c | <a href="#">3571992</a> | NE | Spy49_0929c | <a href="#">6985929</a> | NE | -             | * |          |         | Mg2+/citrate complex secondary transporter                        |
| M5005_Spy_0901  | <a href="#">3571993</a> | NE | Spy49_0930  | <a href="#">6985930</a> | NE | -             | * |          |         | hypothetical protein M5005_Spy_0901                               |
| M5005_Spy_0902  | <a href="#">3571994</a> | NE |             |                         |    | -             | * |          |         | acetyl-CoA carboxylase biotin carboxyl carrier protein subunit    |
| M5005_Spy_0903  | <a href="#">3571995</a> | NE | Spy49_0933  | <a href="#">6985931</a> | NE | oadB          | * |          |         | oxaloacetate decarboxylase subunit beta                           |
| M5005_Spy_0904  | <a href="#">3571996</a> | NC |             |                         |    | -             | * |          |         | hypothetical protein M5005_Spy_0904                               |
| M5005_Spy_0905  | <a href="#">3571997</a> | NE | Spy49_0934  | <a href="#">6985932</a> | NE | citD          | * |          |         | citrate lyase subunit gamma                                       |
| M5005_Spy_0906  | <a href="#">3571998</a> | NE | Spy49_0936  | <a href="#">6985933</a> | NC | citE          | * |          |         | citrate lyase subunit beta/citryl-CoA lyase subunit               |
| M5005_Spy_0907  | <a href="#">3571999</a> | NC | Spy49_0937  | <a href="#">6985934</a> | NE | citF          | * |          |         | citrate lyase subunit alpha/citrate CoA-transferase               |
| M5005_Spy_0908  | <a href="#">3572000</a> | NE | Spy49_0938  | <a href="#">6985935</a> | NE | citX          | * |          |         | 2-(5'-triphosphoribosyl)-3'-dephosphocoenzyme-A synthase          |
| M5005_Spy_0909  | <a href="#">3572001</a> | NE | Spy49_0939  | <a href="#">6985936</a> | NE | oadA1         | * |          |         | oxaloacetate decarboxylase                                        |
| M5005_Spy_0910c | <a href="#">3572002</a> | NE | Spy49_0940c | <a href="#">6985937</a> | NE | citC          | * |          |         | (citrate (pro-3S)-lyase) ligase                                   |
| M5005_Spy_0911c | <a href="#">3572003</a> | NE | Spy49_0942c | <a href="#">6985938</a> | NE | -             | * |          |         | hypothetical protein M5005_Spy_0911                               |
| M5005_Spy_0912  | <a href="#">3572004</a> | NC |             |                         |    | -             | * |          |         | hypothetical protein M5005_Spy_0912                               |
| M5005_Spy_0913c | <a href="#">3572005</a> | C  | Spy49_0943c | <a href="#">6985939</a> | C  | <b>xerS</b>   | * |          | SP_1159 | site-specific tyrosine recombinase XerS                           |
| M5005_Spy_0914  | <a href="#">3572006</a> | NE | Spy49_0944  | <a href="#">6985940</a> | NE | -             | * |          |         | phage transcriptional repressor                                   |
| M5005_Spy_0915c | <a href="#">3572007</a> | E  | Spy49_0945c | <a href="#">6985941</a> | E  | <b>ffh</b>    | * | SSA_1167 | SP_1287 | signal recognition particle subunit FFH/SRP54                     |
| M5005_Spy_0916c | <a href="#">3572008</a> | C  | Spy49_0946c | <a href="#">6985942</a> | NC | yixM          | * |          |         | DNA-binding protein                                               |
| M5005_Spy_0917c | <a href="#">3572009</a> | C  | Spy49_0947c | <a href="#">6985943</a> | NE | -             | * |          |         | GntR family transcriptional regulator                             |
| M5005_Spy_0918c | <a href="#">3571971</a> | NE | Spy49_0948c | <a href="#">6985944</a> | NE | -             | * |          |         | hypothetical protein M5005_Spy_0918                               |
| M5005_Spy_0919  | <a href="#">3571972</a> | C  | Spy49_0949  | <a href="#">6985945</a> | C  | <b>guaA</b>   | * |          | SP_1445 | GMP synthase                                                      |
| M5005_Spy_0920c | <a href="#">3571973</a> | NE | Spy49_0951c | <a href="#">6985946</a> | NE | murM2         | * |          |         | UDP-N-acetylmuramoylpentapeptide-lysine N(6)-alanyltransferase    |
| M5005_Spy_0921c | <a href="#">3571974</a> | NE | Spy49_0952c | <a href="#">6985947</a> | NE | -             | * |          |         | ABC transporter ATP-binding protein                               |
| M5005_Spy_0922c | <a href="#">3571975</a> | NE | Spy49_0953c | <a href="#">6985948</a> | NE | pdxK          | * |          |         | hypothetical protein M5005_Spy_0922                               |
| M5005_Spy_0923c | <a href="#">3571976</a> | NE | Spy49_0954c | <a href="#">6985949</a> | NE | -             | * |          |         | pyridoxamine kinase                                               |
| M5005_Spy_0924  | <a href="#">3571977</a> | NE | Spy49_0955  | <a href="#">6985950</a> | NE | -             | * |          |         | GntR family transcriptional regulator                             |
| M5005_Spy_0925c | <a href="#">3571978</a> | NE | Spy49_0957c | <a href="#">6985951</a> | NE | rmhB          | * |          |         | anaerobic ribonucleoside-triphosphate reductase                   |
| M5005_Spy_0926c | <a href="#">3571979</a> | NC | Spy49_0958c | <a href="#">6985952</a> | E  | -             | * |          |         | cardiolipin synthetase                                            |
| M5005_Spy_0927c | <a href="#">3571980</a> | E  | Spy49_0959c | <a href="#">6985953</a> | C  | <b>fts.1</b>  | * |          |         | formate--tetrahydrofolate ligase                                  |
| M5005_Spy_0928c | <a href="#">3571981</a> | NE | Spy49_0960c | <a href="#">6985954</a> | NE | lplA          | * |          |         | lipote-protein ligase A                                           |
| M5005_Spy_0929c | <a href="#">3571982</a> | NE | Spy49_0961c | <a href="#">6985955</a> | NE | -             | * |          |         | SIR2 family protein                                               |
| M5005_Spy_0930c | <a href="#">3571983</a> | NE | Spy49_0962c | <a href="#">6985956</a> | NE | -             | * |          |         | hypothetical protein M5005_Spy_0930                               |
| M5005_Spy_0931c | <a href="#">3571984</a> | NE | Spy49_0963c | <a href="#">6985957</a> | NE | -             | * |          |         | glycine cleavage system protein H                                 |
| M5005_Spy_0932c | <a href="#">3571985</a> | NE | Spy49_0964c | <a href="#">6985958</a> | NE | -             | * |          |         | luciferase-like monooxygenase                                     |
| M5005_Spy_0933c | <a href="#">3571986</a> | NE | Spy49_0965c | <a href="#">6985959</a> | NE | -             | * |          |         | NADH-dependent flavin oxidoreductase                              |
| M5005_Spy_0934c | <a href="#">3571987</a> | NE | Spy49_0966c | <a href="#">6985960</a> | NE | -             | * |          |         | lipote-protein ligase A                                           |
| M5005_Spy_0935  | <a href="#">3571988</a> | C  | Spy49_0967  | <a href="#">6985961</a> | E  | <b>dprB</b>   | * |          | SP_1230 | phosphopantothenate--cysteine ligase                              |
| M5005_Spy_0936  | <a href="#">3571989</a> | E  | Spy49_0968  | <a href="#">6985962</a> | E  | <b>dfp</b>    | * |          | SP_1231 | phosphopantothenoylcysteine decarboxylase                         |
| M5005_Spy_0937  | <a href="#">3571990</a> | NE | Spy49_0969  | <a href="#">6985963</a> | C  | -             | * |          |         | transporter                                                       |
| M5005_Spy_0938  | <a href="#">3571952</a> | E  | Spy49_0970  | <a href="#">6985964</a> | E  | <b>pgmA</b>   |   |          |         |                                                                   |

|                 |                         |    |             |                         |    |       |   |          |                                                            |
|-----------------|-------------------------|----|-------------|-------------------------|----|-------|---|----------|------------------------------------------------------------|
| M5005_Spy_0943c | <a href="#">3571957</a> | NE | Spy49_0975c | <a href="#">6985969</a> | NE | cdd   | * |          | cytidine deaminase                                         |
| M5005_Spy_0944c | <a href="#">3571958</a> | NE | Spy49_0976c | <a href="#">6985970</a> | NE | -     | - |          | 16S rRNA m(2)G 1207 methyltransferase                      |
| M5005_Spy_0945  | <a href="#">3571959</a> | E  | Spy49_0977  | <a href="#">6985971</a> | E  | coaA  | * | SP_0839  | pantothenate kinase                                        |
| M5005_Spy_0946  | <a href="#">3571960</a> | NE | Spy49_0978  | <a href="#">6985972</a> | NC | rpsT  | - |          | 30S ribosomal protein S20                                  |
| M5005_Spy_0947c | <a href="#">3571961</a> | NE | Spy49_0979c | <a href="#">6985973</a> | C  | ciaH  | * |          | sensor protein                                             |
| M5005_Spy_0948c | <a href="#">3571962</a> | NE | Spy49_0980c | <a href="#">6985974</a> | E  | ciaR  | * |          | transcriptional regulatory protein                         |
| M5005_Spy_0949c | <a href="#">3571963</a> | NE | Spy49_0981c | <a href="#">6985975</a> | NE | pepN  | * |          | lysyl aminopeptidase/alanine aminopeptidase                |
| M5005_Spy_0950c | <a href="#">3571964</a> | NC | Spy49_0982c | <a href="#">6985976</a> | NE | phoU  | * |          | phosphate transporter protein                              |
| M5005_Spy_0951c | <a href="#">3571965</a> | NE | Spy49_0983c | <a href="#">6985977</a> | NC | pstB  | * |          | phosphate transporter ATP-binding protein                  |
| M5005_Spy_0952c | <a href="#">3571966</a> | NE | Spy49_0984c | <a href="#">6985978</a> | C  | pstB2 | * | SSA_0944 | phosphate transporter ATP-binding protein                  |
| M5005_Spy_0953c | <a href="#">3571967</a> | NE | Spy49_0985c | <a href="#">6985979</a> | NC | pstA  | * |          | phosphate transporter permease                             |
| M5005_Spy_0954c | <a href="#">3571968</a> | NC | Spy49_0986  | <a href="#">6985980</a> | NC | pstC  | * |          | phosphate transporter permease                             |
| M5005_Spy_0955c | <a href="#">3571969</a> | NE | Spy49_0987c | <a href="#">6985981</a> | NC | pstS  | * |          | phosphate-binding protein                                  |
| M5005_Spy_0956c | <a href="#">3571970</a> | E  | Spy49_0988c | <a href="#">6985982</a> | E  | -     | - |          | 16S rRNA m(5)C 967 methyltransferase                       |
| M5005_Spy_0957c | <a href="#">3571932</a> | NE | Spy49_0989c | <a href="#">6985983</a> | NE | -     | - |          | myo-inositol-1(or 4)-monophosphatase                       |
| M5005_Spy_0958c | <a href="#">3571933</a> | NE | Spy49_0990c | <a href="#">6985984</a> | NE | -     | - |          | hypothetical protein M5005_Spy_0958                        |
| M5005_Spy_0959c | <a href="#">3571934</a> | NE | Spy49_0991c | <a href="#">6985985</a> | NE | spxA  | * |          | Spx family transcriptional regulator                       |
| M5005_Spy_0960c | <a href="#">3571935</a> | E  | Spy49_0992c | <a href="#">6985986</a> | E  | mreA  | * | SSA_0936 | bifunctional riboflavin kinase/FMN adenylyltransferase     |
| M5005_Spy_0961c | <a href="#">3571936</a> | NE | Spy49_0993c | <a href="#">6985987</a> | NE | truB  | * | SP_1110  | tRNA pseudouridine synthase B                              |
| M5005_Spy_0962c | <a href="#">3571937</a> | NE | Spy49_0994c | <a href="#">6985988</a> | NE | -     | - |          | hypothetical protein M5005_Spy_0962                        |
| M5005_Spy_0963c | <a href="#">3571938</a> | NE | Spy49_0995c | <a href="#">6985989</a> | NE | -     | - |          | hypothetical protein M5005_Spy_0963                        |
| M5005_Spy_0964c | <a href="#">3571939</a> | NE | Spy49_0996c | <a href="#">6985990</a> | NE | -     | - |          | type I restriction-modification system specificity subunit |
| M5005_Spy_0965c | <a href="#">3571940</a> | NE | Spy49_0997c | <a href="#">6985991</a> | NE | -     | - |          | ABC transporter permease                                   |
| M5005_Spy_0967c | <a href="#">3571942</a> | NE | Spy49_0998c | <a href="#">6985992</a> | NE | -     | - |          | ABC transporter ATP-binding protein                        |
| M5005_Spy_0968  | <a href="#">3571943</a> | NE | Spy49_0999  | <a href="#">6985993</a> | NE | -     | - |          | TetR family transcriptional regulator                      |
| M5005_Spy_0969c | <a href="#">3571944</a> | NC | -           | -                       | -  | -     | - |          | hypothetical protein M5005_Spy_0969                        |
| M5005_Spy_0970c | <a href="#">3571945</a> | NE | Spy49_1000c | <a href="#">6985994</a> | NE | -     | - |          | NAD-dependent K+ or Na+ uptake system component            |
| M5005_Spy_0971c | <a href="#">3571946</a> | NE | Spy49_1001c | <a href="#">6985995</a> | NE | -     | - |          | Gls24 family general stress protein                        |
| M5005_Spy_0972c | <a href="#">3571947</a> | NE | Spy49_1002c | <a href="#">6985996</a> | NE | -     | - |          | hypothetical protein M5005_Spy_0972                        |
| M5005_Spy_0973c | <a href="#">3571948</a> | NE | Spy49_1003c | <a href="#">6985997</a> | NE | -     | - |          | Gls24 family general stress protein                        |
| M5005_Spy_0974c | <a href="#">3571949</a> | NC | Spy49_1004c | <a href="#">6985998</a> | NC | -     | - |          | small integral membrane protein                            |
| M5005_Spy_0975c | <a href="#">3571950</a> | NE | Spy49_1005c | <a href="#">6985999</a> | NE | -     | - |          | hypothetical protein M5005_Spy_0975                        |
| M5005_Spy_0976c | <a href="#">3571951</a> | NE | Spy49_1006c | <a href="#">6986000</a> | NE | -     | - |          | hypothetical protein M5005_Spy_0976                        |
| M5005_Spy_0977c | <a href="#">3571913</a> | C  | Spy49_1007c | <a href="#">6986001</a> | E  | pcrA  | * | SP_1087  | DNA helicase II                                            |
| M5005_Spy_0978  | <a href="#">3571915</a> | NC | Spy49_1008  | <a href="#">6986002</a> | NC | -     | - |          | Na(+)-linked D-alanine glycine permease                    |
| M5005_Spy_0979c | <a href="#">3571914</a> | C  | -           | -                       | -  | -     | - |          | hypothetical protein M5005_Spy_0979                        |
| M5005_Spy_0980  | <a href="#">3571916</a> | NE | Spy49_1009  | <a href="#">6986003</a> | NE | -     | - |          | cobalt-zinc-cadmium resistance protein                     |
| M5005_Spy_0981c | <a href="#">3571917</a> | NE | Spy49_1010c | <a href="#">6986004</a> | NE | cfa   | * |          | cAMP factor                                                |
| M5005_Spy_0982c | <a href="#">3571918</a> | NE | Spy49_1011c | <a href="#">6986005</a> | NE | -     | - |          | histidine-binding protein                                  |
| M5005_Spy_0983c | <a href="#">3571919</a> | NC | Spy49_1012c | <a href="#">6986006</a> | NE | -     | - |          | histidine transport ATP-binding protein                    |
| M5005_Spy_0984c | <a href="#">3571920</a> | NE | Spy49_1013c | <a href="#">6986007</a> | NE | -     | - |          | histidine transporter permease                             |
| M5005_Spy_0985c | <a href="#">3571921</a> | NE | Spy49_1014c | <a href="#">6986008</a> | NE | -     | - |          | phnA protein                                               |
| M5005_Spy_0986c | <a href="#">3571922</a> | E  | Spy49_1015c | <a href="#">6986009</a> | E  | glimS | * | SSA_2107 | glucosamine--fructose-6-phosphate aminotransferase         |
| M5005_Spy_0987c | <a href="#">3571923</a> | NE | Spy49_1016c | <a href="#">6986010</a> | NE | sipC  | * |          | signal peptidase I                                         |
| M5005_Spy_0988c | <a href="#">3571924</a> | E  | Spy49_1017c | <a href="#">6986011</a> | E  | pyk   | * | SSA_0848 | pyruvate kinase                                            |
| M5005_Spy_0989c | <a href="#">3571925</a> | E  | Spy49_1018c | <a href="#">6986012</a> | E  | pfkA  | * | SSA_0847 | 6-phosphofructokinase                                      |
| M5005_Spy_0990c | <a href="#">3571926</a> | E  | Spy49_1019c | <a href="#">6986013</a> | E  | dnaE  | * | SSA_0846 | DNA polymerase III DnaE                                    |
| M5005_Spy_0991  | <a href="#">3571927</a> | NC | Spy49_1020  | <a href="#">6986014</a> | NE | -     | - |          | GntR family transcriptional regulator                      |
| M5005_Spy_0992  | <a href="#">3571928</a> | NE | Spy49_1021  | <a href="#">6986015</a> | C  | -     | - |          | ABC transporter ATP-binding protein                        |
| M5005_Spy_0993  | <a href="#">3571929</a> | NE | Spy49_1022  | <a href="#">6986016</a> | C  | -     | - |          | ABC transporter permease                                   |
| M5005_Spy_0994c | <a href="#">3571930</a> | C  | Spy49_1023c | <a href="#">6986017</a> | E  | -     | - |          | membrane-associated alkaline phosphatase                   |
| M5005_Spy_0995c | <a href="#">3571931</a> | NE | -           | -                       | -  | -     | - |          | phage protein                                              |
| M5005_Spy_0996  | <a href="#">3571893</a> | NE | -           | -                       | -  | speA2 | - |          | enterotoxin                                                |
| M5005_Spy_0997c | <a href="#">3571894</a> | NE | -           | -                       | -  | -     | - |          | phage protein                                              |
| M5005_Spy_0998c | <a href="#">3571895</a> | NE | -           | -                       | -  | -     | - |          | phage protein                                              |
| M5005_Spy_0999c | <a href="#">3571896</a> | NE | -           | -                       | -  | -     | - |          | phage protein                                              |
| M5005_Spy_1000c | <a href="#">3571897</a> | NE | -           | -                       | -  | -     | - |          | phage protein                                              |
| M5005_Spy_1001c | <a href="#">3571898</a> | NE | -           | -                       | -  | -     | - |          | phage-associated cell wall hydrolase                       |
| M5005_Spy_1002c | <a href="#">3571899</a> | NE | -           | -                       | -  | -     | - |          | N-acetylmuramoyl-L-alanine amidase                         |
| M5005_Spy_1003c | <a href="#">3571900</a> | NE | -           | -                       | -  | -     | - |          | phage protein                                              |
| M5005_Spy_1004c | <a href="#">3571901</a> | NC | -           | -                       | -  | -     | - |          | phage protein                                              |
| M5005_Spy_1005c | <a href="#">3571902</a> | NE | -           | -                       | -  | -     | - |          | phage protein                                              |
| M5005_Spy_1006c | <a href="#">3571903</a> | NE | -           | -                       | -  | -     | - |          | phage structural protein                                   |
| M5005_Spy_1007c | <a href="#">3571904</a> | NE | -           | -                       | -  | -     | - |          | phage protein                                              |
| M5005_Spy_1008c | <a href="#">3571905</a> | NE | -           | -                       | -  | -     | - |          | hypothetical protein M5005_Spy_1008                        |
| M5005_Spy_1009c | <a href="#">3571906</a> | NE | -           | -                       | -  | -     | - |          | phage protein                                              |
| M5005_Spy_1010c | <a href="#">3571907</a> | NC | -           | -                       | -  | -     | - |          | phage protein                                              |
| M5005_Spy_1011c | <a href="#">3571908</a> | NE | -           | -                       | -  | -     | - |          | phage protein                                              |
| M5005_Spy_1012c | <a href="#">3571909</a> | NE | -           | -                       | -  | -     | - |          | antigen A                                                  |
| M5005_Spy_1013c | <a href="#">3571910</a> | NE | -           | -                       | -  | -     | - |          | antigen B                                                  |
| M5005_Spy_1014c | <a href="#">3571911</a> | NE | -           | -                       | -  | -     | - |          | antigen C                                                  |
| M5005_Spy_1015c | <a href="#">3571912</a> | NE | -           | -                       | -  | -     | - |          | phage protein                                              |
| M5005_Spy_1016c | <a href="#">3571874</a> | NE | -           | -                       | -  | -     | - |          | phage protein                                              |
| M5005_Spy_1017c | <a href="#">3571875</a> | NE | -           | -                       | -  | -     | - |          | phage protein                                              |
| M5005_Spy_1018c | <a href="#">3571876</a> | NE | -           | -                       | -  | -     | - |          | phage protein                                              |
| M5005_Spy_1019c | <a href="#">3571877</a> | NE | -           | -                       | -  | -     | - |          | phage scaffold protein                                     |
| M5005_Spy_1020c | <a href="#">3571878</a> | NE | -           | -                       | -  | -     | - |          | phage protein                                              |
| M5005_Spy_1021c | <a href="#">3571879</a> | NE | -           | -                       | -  | -     | - |          | phage protein                                              |
| M5005_Spy_1022c | <a href="#">3571880</a> | NE | -           | -                       | -  | -     | - |          | portal protein                                             |
| M5005_Spy_1023c | <a href="#">3571881</a> | NE | -           | -                       | -  | -     | - |          | terminase large subunit                                    |
| M5005_Spy_1024c | <a href="#">3571882</a> | NE | -           | -                       | -  | -     | - |          | phage protein                                              |
| M5005_Spy_1025c | <a href="#">3571883</a> | NE | -           | -                       | -  | -     | - |          | ArpU family phage encoded transcriptional regulator        |
| M5005_Spy_1026c | <a href="#">3571884</a> | NE | -           | -                       | -  | -     | - |          | phage protein                                              |
| M5005_Spy_1027c | <a href="#">3571885</a> | NE | -           | -                       | -  | -     | - |          | phage protein                                              |
| M5005_Spy_1028c | <a href="#">3571886</a> | NE | -           | -                       | -  | -     | - |          | phage protein                                              |
| M5005_Spy_1029c | <a href="#">3571887</a> | NE | -           | -                       | -  | -     | - |          | phage protein                                              |
| M5005_Spy_1030c | <a href="#">3571888</a> | NE | -           | -                       | -  | -     | - |          | phage protein                                              |
| M5005_Spy_1031c | <a href="#">3571889</a> | NE | -           | -                       | -  | -     | - |          | phage protein                                              |
| M5005_Spy_1032c | <a href="#">3571890</a> | NE | -           | -                       | -  | -     | - |          | phage protein                                              |
| M5005_Spy_1033c | <a href="#">3571891</a> | NE | -           | -                       | -  | -     | - |          | phage protein                                              |
| M5005_Spy_1034c | <a href="#">3571892</a> | NE | -           | -                       | -  | -     | - |          | phage protein                                              |
| M5005_Spy_1035c | <a href="#">3571893</a> | NE | -           | -                       | -  | -     | - |          | phage protein                                              |
| M5005_Spy_1036c | <a href="#">3571895</a> | NE | -           | -                       | -  | ssb2  | - |          | phage single-strand DNA binding protein                    |
| M5005_Spy_1037c | <a href="#">3571896</a> | NE | -           | -                       | -  | ssb1  | - |          | phage single-strand DNA binding protein                    |
| M5005_Spy_1038c | <a href="#">3571897</a> | NE | -           | -                       | -  | -     | - |          | phage protein                                              |
| M5005_Spy_1039c | <a href="#">3571898</a> | NE | -           | -                       | -  | -     | - |          | phage protein                                              |
| M5005_Spy_1040c | <a href="#">3571899</a> | NE | -           | -                       | -  | -     | - |          | phage protein                                              |
| M5005_Spy_1041c | <a href="#">3571860</a> | NC | -           | -                       | -  | -     | - |          | phage protein                                              |
| M5005_Spy_1042c | <a href="#">3571861</a> | NC | -           | -                       | -  | -     | - |          | phage replication protein                                  |
| M5005_Spy_1043c | <a href="#">3571862</a> | NE | -           | -                       | -  | -     | - |          | phage protein                                              |
| M5005_Spy_1044  | <a href="#">3571863</a> | NE | -           | -                       | -  | -     | - |          | phage protein                                              |
| M5005_Spy_1045c | <a href="#">3571864</a> | NC | -           | -                       | -  | -     | - |          | transcriptional regulator                                  |



|                 |                         |    |             |                         |    |        |   |                                                              |                                                |                                       |
|-----------------|-------------------------|----|-------------|-------------------------|----|--------|---|--------------------------------------------------------------|------------------------------------------------|---------------------------------------|
| M5005_Spy_1046  | <a href="#">3571865</a> | NE | -           | -                       | -  | -      | - | phage protein                                                |                                                |                                       |
| M5005_Spy_1047c | <a href="#">3571866</a> | NE | -           | -                       | -  | -      | - | phage protein                                                |                                                |                                       |
| M5005_Spy_1048  | <a href="#">3571867</a> | NE | -           | -                       | -  | -      | - | phage protein                                                |                                                |                                       |
| M5005_Spy_1049c | <a href="#">3571868</a> | NC | -           | -                       | -  | -      | - | phage protein                                                |                                                |                                       |
| M5005_Spy_1050  | <a href="#">3571869</a> | C  | -           | -                       | -  | -      | - | phage transcriptional repressor                              |                                                |                                       |
| M5005_Spy_1051  | <a href="#">3571870</a> | NE | -           | -                       | -  | -      | - | phage protein                                                |                                                |                                       |
| M5005_Spy_1052  | <a href="#">3571871</a> | NE | int.1       | -                       | -  | -      | - | integrase                                                    |                                                |                                       |
| M5005_Spy_1053  | <a href="#">3571872</a> | NC | -           | -                       | -  | -      | - | hypothetical protein M5005_Spy_1053                          |                                                |                                       |
| M5005_Spy_1054  | <a href="#">3571873</a> | NE | Spy49_1024  | <a href="#">6986019</a> | NE | -      | - | hypothetical protein M5005_Spy_1054                          |                                                |                                       |
| M5005_Spy_1055c | <a href="#">3571835</a> | NE | Spy49_1025c | <a href="#">6986020</a> | NE | glgP   | * | glycogen phosphorylase                                       |                                                |                                       |
| M5005_Spy_1056c | <a href="#">3571836</a> | NE | Spy49_1026c | <a href="#">6986021</a> | NE | malM   | * | 4-alpha-glucanotransferase                                   |                                                |                                       |
| M5005_Spy_1057c | <a href="#">3571837</a> | NE | Spy49_1027c | <a href="#">6986022</a> | NE | malR   | * | LacI family transcriptional regulator                        |                                                |                                       |
| M5005_Spy_1058  | <a href="#">3571838</a> | NE | Spy49_1028  | <a href="#">6986023</a> | NE | malE   | * | maltose/maltodextrin-binding protein                         |                                                |                                       |
| M5005_Spy_1059  | <a href="#">3571839</a> | NE | Spy49_1029  | <a href="#">6986024</a> | NE | malF   | * | maltose ABC transporter permease                             |                                                |                                       |
| M5005_Spy_1060  | <a href="#">3571840</a> | NE | Spy49_1030  | <a href="#">6986025</a> | NE | malG   | * | maltose ABC transporter permease                             |                                                |                                       |
| M5005_Spy_1061  | <a href="#">3571841</a> | NE | -           | -                       | -  | -      | - | LacI family transcriptional regulator                        |                                                |                                       |
| M5005_Spy_1062c | <a href="#">3571842</a> | NE | -           | -                       | -  | malA   | - | maltodextrose utilization protein                            |                                                |                                       |
| M5005_Spy_1063c | <a href="#">3571843</a> | NE | -           | -                       | -  | malD   | - | maltodextrin transporter permease                            |                                                |                                       |
| M5005_Spy_1064c | <a href="#">3571844</a> | NE | -           | -                       | -  | malC   | - | maltose ABC transporter permease                             |                                                |                                       |
| M5005_Spy_1065c | <a href="#">3571845</a> | NE | -           | -                       | -  | amyA   | - | alpha-amylase                                                |                                                |                                       |
| M5005_Spy_1066c | <a href="#">3571846</a> | NE | -           | -                       | -  | amyB   | - | neopullulanase/cyclomaltodextrinase/maltogenic alpha-amylase |                                                |                                       |
| M5005_Spy_1067c | <a href="#">3571847</a> | NE | -           | -                       | -  | malX   | - | maltose/maltodextrin-binding protein                         |                                                |                                       |
| M5005_Spy_1068  | <a href="#">3571848</a> | NE | Spy49_1032  | <a href="#">6986027</a> | NE | -      | - | transposase                                                  |                                                |                                       |
| M5005_Spy_1069c | <a href="#">3571849</a> | NE | Spy49_1033c | <a href="#">6986028</a> | NE | -      | * | esterase                                                     |                                                |                                       |
| M5005_Spy_1070c | <a href="#">3571850</a> | NE | Spy49_1034c | <a href="#">6986029</a> | NE | dltD   | * | hypothetical protein M5005_Spy_1070                          |                                                |                                       |
| M5005_Spy_1071c | <a href="#">3571851</a> | NE | Spy49_1035c | <a href="#">6986030</a> | NE | dltC   | - | D-alanine--poly(phosphoribitol) ligase subunit 2             |                                                |                                       |
| M5005_Spy_1072c | <a href="#">3571852</a> | NE | Spy49_1036c | <a href="#">6986031</a> | NC | dltB   | * | protein DIB                                                  |                                                |                                       |
| M5005_Spy_1073c | <a href="#">3571853</a> | NE | Spy49_1037c | <a href="#">6986032</a> | NC | dltA   | * | D-alanine--poly(phosphoribitol) ligase subunit 1             |                                                |                                       |
| M5005_Spy_1074c | <a href="#">3571815</a> | NC | Spy49_1038c | <a href="#">6986033</a> | NC | -      | - | hypothetical protein M5005_Spy_1074                          |                                                |                                       |
| M5005_Spy_1075c | <a href="#">3571816</a> | NE | Spy49_1039c | <a href="#">6986034</a> | NE | uvrB   | * | excinuclease ABC subunit B                                   |                                                |                                       |
| M5005_Spy_1076  | <a href="#">3571817</a> | E  | Spy49_1040  | <a href="#">6986035</a> | C  | glnH   | * | transporter                                                  |                                                |                                       |
| M5005_Spy_1077  | <a href="#">3571818</a> | NC | Spy49_1041  | <a href="#">6986036</a> | C  | glnQ.2 | * | glutamine ABC transporter ATP-binding protein                |                                                |                                       |
| M5005_Spy_1078c | <a href="#">3571819</a> | NC | Spy49_1042c | <a href="#">6986037</a> | NC | -      | - | hypothetical protein M5005_Spy_1078                          |                                                |                                       |
| M5005_Spy_1079c | <a href="#">3571820</a> | NE | Spy49_1043c | <a href="#">6986038</a> | NE | -      | - | PTS system cellobiose-specific transporter subunit IIC       |                                                |                                       |
| M5005_Spy_1080c | <a href="#">3571821</a> | NE | Spy49_1044c | <a href="#">6986039</a> | NE | -      | * | hypothetical protein M5005_Spy_1080                          |                                                |                                       |
| M5005_Spy_1081c | <a href="#">3571822</a> | NE | Spy49_1045c | <a href="#">6986040</a> | NE | -      | * | PTS system cellobiose-specific transporter subunit IIIA      |                                                |                                       |
| M5005_Spy_1082c | <a href="#">3571823</a> | NE | Spy49_1046c | <a href="#">6986041</a> | NE | -      | * | PTS system cellobiose-specific transporter subunit IIB       |                                                |                                       |
| M5005_Spy_1083c | <a href="#">3571824</a> | NC | Spy49_1047c | <a href="#">6986042</a> | NC | -      | * | PTS system, mannitol (cryptic)-specific IIA component        |                                                |                                       |
| M5005_Spy_1084c | <a href="#">3571825</a> | NE | Spy49_1048c | <a href="#">6986043</a> | NE | -      | * | outer surface protein                                        |                                                |                                       |
| M5005_Spy_1085c | <a href="#">3571826</a> | NE | Spy49_1049c | <a href="#">6986044</a> | NE | bgIA.2 | * | beta-glucosidase                                             |                                                |                                       |
| M5005_Spy_1086  | <a href="#">3571827</a> | NE | Spy49_1050  | <a href="#">6986045</a> | NE | -      | * | nicotinamide mononucleotide transporter                      |                                                |                                       |
| M5005_Spy_1087c | <a href="#">3571828</a> | NC | Spy49_1051c | <a href="#">6986046</a> | NC | -      | * | hypothetical protein M5005_Spy_1087                          |                                                |                                       |
| M5005_Spy_1088c | <a href="#">3571829</a> | E  | Spy49_1053c | <a href="#">6986047</a> | E  | obgE   | * | SSA_0807                                                     | SP_1079                                        | GTPase ObgE                           |
| M5005_Spy_1089c | <a href="#">3571830</a> | NC | -           | -                       | -  | -      | - | hypothetical protein M5005_Spy_1089                          |                                                |                                       |
| M5005_Spy_1090  | <a href="#">3571831</a> | NE | Spy49_1054  | <a href="#">6986048</a> | NE | -      | * | transposase                                                  |                                                |                                       |
| M5005_Spy_1091  | <a href="#">3571832</a> | NE | Spy49_1055  | <a href="#">6986049</a> | NE | -      | - | transposase                                                  |                                                |                                       |
| M5005_Spy_1092c | <a href="#">3571833</a> | NE | Spy49_1056  | <a href="#">6986050</a> | NE | -      | - | transposase                                                  |                                                |                                       |
| M5005_Spy_1093  | <a href="#">3571834</a> | NE | Spy49_1057  | <a href="#">6986051</a> | NE | -      | - | transposase                                                  |                                                |                                       |
| M5005_Spy_1094c | <a href="#">3571796</a> | NE | Spy49_1059  | <a href="#">6986052</a> | NE | -      | - | transposase                                                  |                                                |                                       |
| M5005_Spy_1095  | <a href="#">3571797</a> | NE | Spy49_1060  | <a href="#">6986053</a> | NC | -      | - | transposase                                                  |                                                |                                       |
| M5005_Spy_1096c | <a href="#">3571798</a> | NE | Spy49_1062  | <a href="#">6986054</a> | NE | -      | - | transposase                                                  |                                                |                                       |
| M5005_Spy_1097c | <a href="#">3571799</a> | NE | Spy49_1064c | <a href="#">6986055</a> | NC | rsuA   | * | ribosomal small subunit pseudouridine synthase A             |                                                |                                       |
| M5005_Spy_1098c | <a href="#">3571800</a> | NE | Spy49_1065  | <a href="#">6986056</a> | NE | -      | * | hypothetical protein M5005_Spy_1093                          |                                                |                                       |
| M5005_Spy_1099c | <a href="#">3571801</a> | NE | Spy49_1066c | <a href="#">6986057</a> | NE | -      | * | major facilitator transporter                                |                                                |                                       |
| M5005_Spy_1100c | <a href="#">3571802</a> | NE | Spy49_1067  | <a href="#">6986058</a> | NE | -      | * | hypothetical protein M5005_Spy_1095                          |                                                |                                       |
| M5005_Spy_1101c | <a href="#">3571803</a> | NE | Spy49_1070c | <a href="#">6986059</a> | NE | -      | * | thioesterase                                                 |                                                |                                       |
| M5005_Spy_1102c | <a href="#">3571804</a> | NE | Spy49_1071c | <a href="#">6986060</a> | NE | -      | - | phosphorylase Pnp/Udp family protein                         |                                                |                                       |
| M5005_Spy_1103c | <a href="#">3571805</a> | E  | Spy49_1072c | <a href="#">6986061</a> | NE | -      | * | tRNA (uracil-5-)-methyltransferase                           |                                                |                                       |
| M5005_Spy_1104c | <a href="#">3571806</a> | NE | Spy49_1073c | <a href="#">6986062</a> | NE | psr    | * | LyR family transcriptional regulator                         |                                                |                                       |
| M5005_Spy_1105c | <a href="#">3571807</a> | NE | Spy49_1074c | <a href="#">6986063</a> | NE | aroK   | * | shikimate kinase                                             |                                                |                                       |
| M5005_Spy_1106c | <a href="#">3571808</a> | NE | Spy49_1075c | <a href="#">6986064</a> | NE | aroA1  | * | 3-phosphoshikimate 1-carboxyvinyltransferase                 |                                                |                                       |
| M5005_Spy_1107c | <a href="#">3571809</a> | NE | Spy49_1076c | <a href="#">6986065</a> | NE | -      | - | ribonuclease BN                                              |                                                |                                       |
| M5005_Spy_1108c | <a href="#">3571810</a> | E  | Spy49_1077c | <a href="#">6986066</a> | E  | map    | * | SSA_1491                                                     | SP_1084                                        | methionine aminopeptidase             |
| M5005_Spy_1109c | <a href="#">3571811</a> | NE | Spy49_1078c | <a href="#">6986067</a> | NC | -      | * | hypothetical protein M5005_Spy_1104                          |                                                |                                       |
| M5005_Spy_1110  | <a href="#">3571812</a> | E  | Spy49_1079c | <a href="#">6986068</a> | NE | -      | * | ribosomal-protein-alanine acetyltransferase                  |                                                |                                       |
| M5005_Spy_1111c | <a href="#">3571813</a> | NE | Spy49_1080c | <a href="#">6986069</a> | NE | grab   | * | protein G-related alpha 2M-binding protein                   |                                                |                                       |
| M5005_Spy_1112c | <a href="#">3571814</a> | E  | Spy49_1082c | <a href="#">6986070</a> | NE | murZ   | * | UDP-N-acetylglucosamine 1-carboxyvinyltransferase            |                                                |                                       |
| M5005_Spy_1113c | <a href="#">3571776</a> | NE | Spy49_1083c | <a href="#">6986071</a> | E  | metK2  | * | SSA_1495                                                     | SP_0762                                        | S-adenosylmethionine synthetase       |
| M5005_Spy_1114  | <a href="#">3571777</a> | NE | Spy49_1084c | <a href="#">6986072</a> | NE | inIA   | * | internalin protein                                           |                                                |                                       |
| M5005_Spy_1115c | <a href="#">3571778</a> | NE | Spy49_1085  | <a href="#">6986073</a> | E  | birA   | * | SSA_0999                                                     | biotin--protein ligase                         |                                       |
| M5005_Spy_1116c | <a href="#">3571779</a> | NE | Spy49_1086c | <a href="#">6986074</a> | NE | -      | - | hypothetical protein M5005_Spy_1111                          |                                                |                                       |
| M5005_Spy_1117  | <a href="#">3571780</a> | NE | Spy49_1087c | <a href="#">6986075</a> | E  | dnaX   | * | SSA_0997                                                     | SP_0865                                        | DNA polymerase III subunits gamma/tau |
| M5005_Spy_1118c | <a href="#">3571781</a> | NE | Spy49_1088c | <a href="#">6986076</a> | NE | -      | * | GAF domain-containing protein                                |                                                |                                       |
| M5005_Spy_1119c | <a href="#">3571782</a> | E  | Spy49_1089  | <a href="#">6986077</a> | NE | -      | * | hypothetical protein M5005_Spy_1114                          |                                                |                                       |
| M5005_Spy_1120c | <a href="#">3571783</a> | C  | -           | -                       | -  | -      | - | hypothetical protein M5005_Spy_1115                          |                                                |                                       |
| M5005_Spy_1121c | <a href="#">3571784</a> | C  | Spy49_1090c | <a href="#">6986078</a> | NE | udk    | * | uridine kinase                                               |                                                |                                       |
| M5005_Spy_1122  | <a href="#">3571785</a> | NE | Spy49_1091  | <a href="#">6986079</a> | NE | deaD2  | * | ATP-dependent RNA helicase                                   |                                                |                                       |
| M5005_Spy_1123  | <a href="#">3571786</a> | NE | Spy49_1092c | <a href="#">6986080</a> | NE | -      | * | peptidoglycan N-acetylglucosamine deacetylase                |                                                |                                       |
| M5005_Spy_1124  | <a href="#">3571787</a> | NE | Spy49_1093c | <a href="#">6986081</a> | E  | gapN   | * | NADP-dependent glyceraldehyde-3-phosphate dehydrogenase      |                                                |                                       |
| M5005_Spy_1125  | <a href="#">3571788</a> | NE | Spy49_1094c | <a href="#">6986082</a> | C  | pstI   | * | SP_1176                                                      | phosphoenolpyruvate-protein phosphotransferase |                                       |
| M5005_Spy_1126  | <a href="#">3571789</a> | NE | Spy49_1095c | <a href="#">6986083</a> | NC | ptsH   | * | SP_1177                                                      | phosphocarrier protein HPr                     |                                       |
| M5005_Spy_1127  | <a href="#">3571790</a> | NE | Spy49_1096  | <a href="#">6986084</a> | NE | nrdH   | * | glutaredoxin                                                 |                                                |                                       |
| M5005_Spy_1128  | <a href="#">3571791</a> | NE | Spy49_1097  | <a href="#">6986085</a> | NE | nrdE.2 | * | ribonucleotide-diphosphate reductase subunit alpha           |                                                |                                       |
| M5005_Spy_1129  | <a href="#">3571792</a> | NE | Spy49_1098  | <a href="#">6986086</a> | NE | -      | - | ribonucleotide-diphosphate reductase subunit beta            |                                                |                                       |
| M5005_Spy_1130  | <a href="#">3571793</a> | NE | Spy49_1099  | <a href="#">6986087</a> | NE | nrdF   | * | chloride channel protein                                     |                                                |                                       |
| M5005_Spy_1131c | <a href="#">3571794</a> | NC | Spy49_1100  | <a href="#">6986088</a> | NE | -      | * | chloride channel protein                                     |                                                |                                       |
| M5005_Spy_1132c | <a href="#">3571795</a> | E  | Spy49_1101  | <a href="#">6986089</a> | NC | -      | - | CAAX amino protease                                          |                                                |                                       |
| M5005_Spy_1133c | <a href="#">3571796</a> | NE | Spy49_1102  | <a href="#">6986090</a> | NC | -      | - | hypothetical protein M5005_Spy_1130                          |                                                |                                       |
| M5005_Spy_1134c | <a href="#">3571797</a> | NE | Spy49_1103  | <a href="#">6986091</a> | NE | -      | - | Cro/CI family transcriptional regulator                      |                                                |                                       |
| M5005_Spy_1135c | <a href="#">3571798</a> | E  | Spy49_1104  | <a href="#">6986092</a> | NE | -      | * | alanyl-tRNA synthetase                                       |                                                |                                       |
| M5005_Spy_1136c | <a href="#">3571799</a> | NE | Spy49_1105c | <a href="#">6986093</a> | NE | -      | * | foldase PrsA                                                 |                                                |                                       |
| M5005_Spy_1137c | <a href="#">3571800</a> | NE | Spy49_1106c | <a href="#">6986094</a> | NE | -      | * | O-methyltransferase                                          |                                                |                                       |
| M5005_Spy_1138c | <a href="#">3571801</a> | NE | Spy49_1107c | <a href="#">6986095</a> | E  | alaS   | * | SSA_0756                                                     | SP_1383                                        | oxalate/formate antiporter            |
| M5005_Spy_1139c | <a href="#">3571802</a> | NE | Spy49_1108c | <a href="#">6986096</a> | NE | -      | * | oligoendopeptidase F                                         |                                                |                                       |
| M5005_Spy_1140  | <a href="#">3571803</a> | NE | Spy49_1109c | <a href="#">6986097</a> | NE | -      | * | competence protein/transcription factor                      |                                                |                                       |
| M5005_Spy_1141  | <a href="#">3571804</a> | NE | Spy49_1110c | <a href="#">6986098</a> | NE | pepB   | * | ribosomal small subunit pseudouridine synthase A             |                                                |                                       |
| M5005_Spy_1142  | <a href="#">3571805</a> | NE | Spy49_1111c | <a href="#">6986099</a> | NE | -      | * | glucosamine-6-phosphate isomerase                            |                                                |                                       |
| M5005_Spy_1143  | <a href="#">3571806</a> | NE | Spy49_1112c | <a href="#">6986100</a> | NE | -      | * | S-adenosylmethionine--tRNA ribosyltransferase-isomerase      |                                                |                                       |
| M5005_Spy_1144  | <a href="#">3571807</a> | NE | Spy49_1113c | <a href="#">6986101</a> | NE | -      | * |                                                              |                                                |                                       |
| M5005_Spy_1145  | <a href="#">3571808</a> | NE | Spy49_1114c | <a href="#">6986102</a> | NE | nagB   | * |                                                              |                                                |                                       |
| M5005_Spy_1146  | <a href="#">3571809</a> | NE | Spy49_1115c | <a href="#">6986103</a> | NE | queA   | * |                                                              |                                                |                                       |

|                 |                         |    |             |                         |       |          |          |                                                                                                         |
|-----------------|-------------------------|----|-------------|-------------------------|-------|----------|----------|---------------------------------------------------------------------------------------------------------|
| M5005_Spy_1141  | <a href="#">3571765</a> | NE | Spy49_1117  | <a href="#">6986104</a> | NE    | -        | *        | hypothetical protein M5005_Spy_1141                                                                     |
| M5005_Spy_1142c | <a href="#">3571766</a> | NE | Spy49_1119c | <a href="#">6984357</a> | NE    | -        | *        | hypothetical protein M5005_Spy_1142                                                                     |
| M5005_Spy_1143c | <a href="#">3571767</a> | NE | Spy49_1120c | <a href="#">6984358</a> | NE    | -        | *        | hypothetical protein M5005_Spy_1143                                                                     |
| M5005_Spy_1144c | <a href="#">3571768</a> | NE | Spy49_1121c | <a href="#">6984359</a> | NC    | -        | *        | hypothetical protein M5005_Spy_1144                                                                     |
| M5005_Spy_1145c | <a href="#">3571769</a> | NE | Spy49_1122c | <a href="#">6984360</a> | NE    | sodA     | *        | speroxide dismutase                                                                                     |
| M5005_Spy_1146c | <a href="#">3571770</a> | E  | Spy49_1123c | <a href="#">6984361</a> | E     | hoIA     | SSA_0720 | DNA polymerase III subunit delta                                                                        |
| M5005_Spy_1147c | <a href="#">3571771</a> | NE | Spy49_1124c | <a href="#">6984362</a> | NE    | comEC    | *        | competence protein ComE                                                                                 |
| M5005_Spy_1148c | <a href="#">3571772</a> | NE | Spy49_1126c | <a href="#">6984363</a> | NE    | comE     | *        | competence protein ComE                                                                                 |
| M5005_Spy_1149c | <a href="#">3571773</a> | E  | Spy49_1127c | <a href="#">6984364</a> | E     | -        | SSA_0713 | 1-acyl-sn-glycerol-3-phosphate acyltransferase                                                          |
| M5005_Spy_1150  | <a href="#">3571774</a> | NE | Spy49_1128  | <a href="#">6984365</a> | NE    | -        | *        | methyltransferase                                                                                       |
| M5005_Spy_1151  | <a href="#">3571775</a> | NE | Spy49_1129  | <a href="#">6984366</a> | NE    | -        | *        | hypothetical protein M5005_Spy_1151                                                                     |
| M5005_Spy_1152c | <a href="#">3571777</a> | NE | Spy49_1130c | <a href="#">6984367</a> | NE    | kup      | *        | kup system potassium uptake protein, partial                                                            |
| M5005_Spy_1154c | <a href="#">3571739</a> | NE | Spy49_1132c | <a href="#">6984368</a> | NE    | deaD     | *        | ATP-dependent RNA helicase                                                                              |
| M5005_Spy_1155c | <a href="#">3571740</a> | NE | Spy49_1133c | <a href="#">6984369</a> | NE    | prfC     | *        | peptide chain release factor 3                                                                          |
| M5005_Spy_1156c | <a href="#">3571741</a> | NE | Spy49_1135c | <a href="#">6984370</a> | NE    | -        | *        | hypothetical protein M5005_Spy_1156                                                                     |
| M5005_Spy_1157c | <a href="#">3571742</a> | E  | Spy49_1136c | <a href="#">6984371</a> | E     | murF     | SSA_0692 | UDP-N-acetylmuramoylalanine-D-glutamyl-L-lysine--D-alanyl-D-alanine ligase                              |
| M5005_Spy_1158c | <a href="#">3571743</a> | E  | Spy49_1137c | <a href="#">6984372</a> | E     | ddl      | SSA_0691 | D-alanyl-alanine synthetase A                                                                           |
| M5005_Spy_1159c | <a href="#">3571744</a> | NE | Spy49_1138c | <a href="#">6984373</a> | C     | recR     | *        | recombination protein RecR                                                                              |
| M5005_Spy_1160c | <a href="#">3571745</a> | NE | Spy49_1139c | <a href="#">6984374</a> | NE    | -        | *        | penicillin-binding protein                                                                              |
| M5005_Spy_1161c | <a href="#">3571746</a> | NE | Spy49_1140c | <a href="#">6984375</a> | NE    | fdhC     | *        | formate transporter                                                                                     |
| M5005_Spy_1162c | <a href="#">3571747</a> | NE | Spy49_1141c | <a href="#">6984376</a> | NE    | -        | *        | hypothetical protein M5005_Spy_1162                                                                     |
| M5005_Spy_1163c | <a href="#">3571748</a> | NE | Spy49_1142c | <a href="#">6984377</a> | NE    | -        | *        | biotin repressor family transcriptional regulator                                                       |
| M5005_Spy_1164c | <a href="#">3571749</a> | NC | Spy49_1143c | <a href="#">6984378</a> | E     | gpmA     | SSA_0688 | phosphoglyceromutase                                                                                    |
| M5005_Spy_1165  | <a href="#">3571750</a> | NE | Spy49_1144  | <a href="#">6984379</a> | NE    | pyrD     | *        | dihydroorotate dehydrogenase 1A                                                                         |
| M5005_Spy_1166c | <a href="#">3571751</a> | NC | Spy49_1145c | <a href="#">6984380</a> | NC    | -        | *        | hypothetical protein M5005_Spy_1166                                                                     |
| M5005_Spy_1167c | <a href="#">3571752</a> | NE | Spy49_1146c | <a href="#">6984381</a> | NC    | -        | *        | lead, cadmium, zinc and mercury transporting ATPase                                                     |
| M5005_Spy_1168c | <a href="#">3571753</a> | NC | -           | -                       | -     | -        | *        | phage protein                                                                                           |
| M5005_Spy_1169  | <a href="#">3571754</a> | NE | -           | -                       | spd3  | -        | *        | streptodornase                                                                                          |
| M5005_Spy_1170  | <a href="#">3571755</a> | NE | -           | -                       | -     | -        | *        | hypothetical protein M5005_Spy_1170                                                                     |
| M5005_Spy_1171c | <a href="#">3571756</a> | NE | -           | -                       | -     | -        | *        | phage-associated cell wall hydrolase                                                                    |
| M5005_Spy_1172c | <a href="#">3571718</a> | NE | -           | -                       | -     | -        | *        | holin                                                                                                   |
| M5005_Spy_1173c | <a href="#">3571719</a> | NE | -           | -                       | -     | -        | *        | phage protein                                                                                           |
| M5005_Spy_1174c | <a href="#">3571720</a> | NE | -           | -                       | -     | -        | *        | phage protein                                                                                           |
| M5005_Spy_1175c | <a href="#">3571721</a> | NE | -           | -                       | -     | -        | *        | phage protein                                                                                           |
| M5005_Spy_1176c | <a href="#">3571722</a> | NE | -           | -                       | -     | -        | *        | phage infection protein                                                                                 |
| M5005_Spy_1177c | <a href="#">3571723</a> | NE | -           | -                       | -     | -        | *        | phage protein                                                                                           |
| M5005_Spy_1178c | <a href="#">3571724</a> | NE | -           | -                       | -     | -        | *        | phage protein                                                                                           |
| M5005_Spy_1179c | <a href="#">3571725</a> | NE | -           | -                       | -     | -        | *        | phage protein                                                                                           |
| M5005_Spy_1180c | <a href="#">3571726</a> | NE | -           | -                       | -     | -        | *        | phage protein                                                                                           |
| M5005_Spy_1181c | <a href="#">3571727</a> | NE | -           | -                       | -     | -        | *        | major tail protein                                                                                      |
| M5005_Spy_1182c | <a href="#">3571728</a> | NE | -           | -                       | -     | -        | *        | phage protein                                                                                           |
| M5005_Spy_1183c | <a href="#">3571729</a> | NE | -           | -                       | -     | -        | *        | phage protein                                                                                           |
| M5005_Spy_1184c | <a href="#">3571730</a> | NE | -           | -                       | -     | -        | *        | phage protein                                                                                           |
| M5005_Spy_1185c | <a href="#">3571731</a> | NE | -           | -                       | -     | -        | *        | phage protein                                                                                           |
| M5005_Spy_1186c | <a href="#">3571732</a> | NE | -           | -                       | -     | -        | *        | phage protein                                                                                           |
| M5005_Spy_1187c | <a href="#">3571733</a> | NE | -           | -                       | -     | -        | *        | phage structural protein                                                                                |
| M5005_Spy_1188c | <a href="#">3571734</a> | NE | -           | -                       | -     | -        | *        | phage protein                                                                                           |
| M5005_Spy_1189c | <a href="#">3571735</a> | NE | -           | -                       | -     | -        | *        | phage terminase                                                                                         |
| M5005_Spy_1190c | <a href="#">3571736</a> | NE | -           | -                       | -     | -        | *        | phage protein                                                                                           |
| M5005_Spy_1191c | <a href="#">3571698</a> | NE | -           | -                       | -     | -        | *        | phage protein                                                                                           |
| M5005_Spy_1192c | <a href="#">3571699</a> | NE | -           | -                       | -     | -        | *        | phage protein                                                                                           |
| M5005_Spy_1193c | <a href="#">3571700</a> | NE | -           | -                       | -     | -        | *        | phage protein                                                                                           |
| M5005_Spy_1194c | <a href="#">3571701</a> | NE | -           | -                       | -     | -        | *        | phage protein                                                                                           |
| M5005_Spy_1195c | <a href="#">3571702</a> | NE | -           | -                       | -     | -        | *        | phage protein                                                                                           |
| M5005_Spy_1196c | <a href="#">3571703</a> | NE | -           | -                       | -     | -        | *        | HNH endonuclease                                                                                        |
| M5005_Spy_1197c | <a href="#">3571704</a> | NE | -           | -                       | -     | -        | *        | phage protein                                                                                           |
| M5005_Spy_1198c | <a href="#">3571705</a> | NE | -           | -                       | -     | -        | *        | phage protein                                                                                           |
| M5005_Spy_1199c | <a href="#">3571706</a> | NE | -           | -                       | -     | -        | *        | phage protein                                                                                           |
| M5005_Spy_1200c | <a href="#">3571707</a> | NE | -           | -                       | -     | -        | *        | phage protein                                                                                           |
| M5005_Spy_1201c | <a href="#">3571708</a> | NE | -           | -                       | -     | -        | *        | phage protein                                                                                           |
| M5005_Spy_1202c | <a href="#">3571709</a> | NC | -           | -                       | -     | -        | *        | phage protein                                                                                           |
| M5005_Spy_1203c | <a href="#">3571710</a> | NE | -           | -                       | -     | -        | *        | phage protein                                                                                           |
| M5005_Spy_1204c | <a href="#">3571711</a> | NE | -           | -                       | -     | -        | *        | recT protein                                                                                            |
| M5005_Spy_1205c | <a href="#">3571712</a> | NE | -           | -                       | -     | -        | *        | phage protein                                                                                           |
| M5005_Spy_1206c | <a href="#">3571713</a> | NE | -           | -                       | -     | -        | *        | phage protein                                                                                           |
| M5005_Spy_1207c | <a href="#">3571714</a> | NC | -           | -                       | -     | -        | *        | phage protein                                                                                           |
| M5005_Spy_1208c | <a href="#">3571715</a> | NE | -           | -                       | -     | -        | *        | phage protein                                                                                           |
| M5005_Spy_1209c | <a href="#">3571716</a> | NE | -           | -                       | -     | -        | *        | DNA replication protein                                                                                 |
| M5005_Spy_1210c | <a href="#">3571717</a> | NE | -           | -                       | -     | -        | *        | phage replication protein                                                                               |
| M5005_Spy_1211c | <a href="#">3571679</a> | NC | -           | -                       | -     | -        | *        | phage protein                                                                                           |
| M5005_Spy_1212c | <a href="#">3571680</a> | NE | -           | -                       | xis   | -        | *        | excisionase                                                                                             |
| M5005_Spy_1213c | <a href="#">3571681</a> | NC | -           | -                       | -     | -        | *        | phage protein                                                                                           |
| M5005_Spy_1214  | <a href="#">3571682</a> | NE | -           | -                       | -     | -        | *        | phage protein                                                                                           |
| M5005_Spy_1215  | <a href="#">3571683</a> | NE | -           | -                       | -     | -        | *        | phage protein                                                                                           |
| M5005_Spy_1216c | <a href="#">3571684</a> | NE | -           | -                       | -     | -        | *        | phage protein                                                                                           |
| M5005_Spy_1217c | <a href="#">3571685</a> | NE | -           | -                       | -     | -        | *        | phage antirepressor protein                                                                             |
| M5005_Spy_1218c | <a href="#">3571686</a> | NE | -           | -                       | -     | -        | *        | phage protein                                                                                           |
| M5005_Spy_1219  | <a href="#">3571687</a> | E  | -           | -                       | -     | -        | *        | Cro/C1 family phage transcriptional regulator                                                           |
| M5005_Spy_1220  | <a href="#">3571688</a> | NE | -           | -                       | -     | -        | *        | phage protein                                                                                           |
| M5005_Spy_1221  | <a href="#">3571689</a> | NE | -           | -                       | -     | -        | *        | phage protein                                                                                           |
| M5005_Spy_1222  | <a href="#">3571690</a> | NE | -           | -                       | int.2 | -        | *        | integrase                                                                                               |
| M5005_Spy_1223c | <a href="#">3571691</a> | NC | Spy49_1147c | <a href="#">6984382</a> | NC    | -        | *        | DNA-binding protein HU                                                                                  |
| M5005_Spy_1224c | <a href="#">3571692</a> | NE | Spy49_1148c | <a href="#">6984383</a> | NE    | -        | *        | hypothetical protein M5005_Spy_1224                                                                     |
| M5005_Spy_1225c | <a href="#">3571693</a> | NE | Spy49_1149c | <a href="#">6984384</a> | NE    | -        | *        | lipase/acylhydrolase                                                                                    |
| M5005_Spy_1226c | <a href="#">3571694</a> | NE | Spy49_1150c | <a href="#">6984385</a> | C     | -        | *        | degV family protein                                                                                     |
| M5005_Spy_1227c | <a href="#">3571695</a> | NE | Spy49_1151c | <a href="#">6984386</a> | NE    | -        | *        | hypothetical protein M5005_Spy_1227                                                                     |
| M5005_Spy_1228c | <a href="#">3571696</a> | NE | Spy49_1152c | <a href="#">6984387</a> | NE    | recN     | *        | DNA repair protein                                                                                      |
| M5005_Spy_1229c | <a href="#">3571697</a> | NE | Spy49_1153c | <a href="#">6984388</a> | NE    | argR1    | *        | arginine repressor ArgR                                                                                 |
| M5005_Spy_1230c | <a href="#">3571659</a> | NE | Spy49_1154c | <a href="#">6984389</a> | NE    | -        | *        | hemolysin                                                                                               |
| M5005_Spy_1231c | <a href="#">3571660</a> | NE | Spy49_1155c | <a href="#">6984390</a> | NE    | fps      | *        | dimethylallyltransferase/geranyltransferase                                                             |
| M5005_Spy_1232c | <a href="#">3571661</a> | NE | Spy49_1156c | <a href="#">6984391</a> | NE    | xseB     | *        | exodeoxyribonuclease VII small subunit                                                                  |
| M5005_Spy_1233c | <a href="#">3571662</a> | NE | Spy49_1157c | <a href="#">6984392</a> | NE    | xseA     | *        | exodeoxyribonuclease VII large subunit                                                                  |
| M5005_Spy_1234c | <a href="#">3571663</a> | C  | Spy49_1158c | <a href="#">6984393</a> | NC    | folD     | SSA_0825 | bifunctional 5,10-methylene-tetrahydrofolate dehydrogenase/ 5,10-methylene-tetrahydrofolate cyclohyd... |
| M5005_Spy_1235c | <a href="#">3571664</a> | NE | Spy49_1159c | <a href="#">6984394</a> | NE    | -        | *        | phosphoglucomutase                                                                                      |
| M5005_Spy_1236c | <a href="#">3571665</a> | NE | Spy49_1160c | <a href="#">6984395</a> | NE    | phr      | *        | deoxyribodipyrimidine photolyase                                                                        |
| M5005_Spy_1237c | <a href="#">3571666</a> | NE | Spy49_1161c | <a href="#">6984396</a> | NE    | argP/gtr | *        | arginine transport ATP-binding protein                                                                  |
| M5005_Spy_1238c | <a href="#">3571667</a> | NE | Spy49_1162c | <a href="#">6984397</a> | NE    | artQ     | *        | arginine transporter permease                                                                           |
| M5005_Spy_1239c | <a href="#">3571668</a> | NC | Spy49_1163c | <a href="#">6984398</a> | NC    | -        | *        | hypothetical protein M5005_Spy_1239                                                                     |
| M5005_Spy_1240  | <a href="#">3571669</a> | NE | Spy49_1164  | <a href="#">6984399</a> | NE    | clpE     | *        | ATP-dependent Clp protease ATP-binding subunit                                                          |
| M5005_Spy_1241  | <a href="#">3571670</a> | NE | Spy49_1165  | <a href="#">6984400</a> | NE    | mutT     | *        | 7,8-dihydro-8-oxoguanine-triphosphatase                                                                 |
| M5005_Spy_1242  | <a href="#">3571671</a> | NE | Spy49_1166  | <a href="#">6984401</a> | NE    | -        | *        | hypothetical protein M5005_Spy_1242                                                                     |

|                 |         |    |             |         |    |             |   |          |         |                                                                                 |
|-----------------|---------|----|-------------|---------|----|-------------|---|----------|---------|---------------------------------------------------------------------------------|
| M5005_Spy_1243c | 3571672 | E  | Spy49_1167c | 6984402 | E  | ileS        | * | SSA_0661 | SP_1659 | isoleucyl-tRNA synthetase                                                       |
| M5005_Spy_1244c | 3571673 | E  | Spy49_1168c | 6984403 | NC | divIVAS     | * |          |         | cell division initiation protein                                                |
| M5005_Spy_1245c | 3571674 | NE | Spy49_1169c | 6984404 | NE | -           | * |          |         | RNA binding protein                                                             |
| M5005_Spy_1246c | 3571675 | NC | Spy49_1170c | 6984405 | NE | -           | * |          |         | hypothetical protein M5005_Spy_1246                                             |
| M5005_Spy_1247c | 3571676 | NE | Spy49_1171c | 6984406 | C  | -           | * |          |         | hypothetical protein M5005_Spy_1247                                             |
| M5005_Spy_1248c | 3571677 | NE | Spy49_1172c | 6984407 | NE | -           | * |          |         | pyridoxal-5'-phosphate family protein                                           |
| M5005_Spy_1249c | 3571678 | E  | Spy49_1173c | 6984408 | E  | ftsZ        | * | SSA_0656 | SP_1666 | cell division protein FtsZ                                                      |
| M5005_Spy_1250c | 3571640 | E  | Spy49_1174c | 6984409 | E  | ftsA        | * |          | SP_1667 | cell division protein                                                           |
| M5005_Spy_1251c | 3571641 | NC | Spy49_1175c | 6984410 | E  | divIB/ftsQ  | * |          | SP_0690 | cell division protein                                                           |
| M5005_Spy_1252c | 3571642 | E  | Spy49_1176c | 6984411 | E  | murG        | * | SSA_0653 | SP_0689 | undecaprenyldiphospho-muramoylpentapeptide beta-N-acetylglucosaminyltransferase |
| M5005_Spy_1253c | 3571643 | E  | Spy49_1177c | 6984412 | E  | murD        | * | SSA_0652 | SP_0688 | UDP-N-acetylmuramoyl-L-alanyl-D-glutamate synthetase                            |
| M5005_Spy_1254c | 3571644 | NE | Spy49_1178c | 6984413 | NE | -           | * |          |         | hypothetical protein M5005_Spy_1254                                             |
| M5005_Spy_1255c | 3571645 | NC | Spy49_1179c | 6984414 | NE | typA        | * |          |         | GTP-binding protein                                                             |
| M5005_Spy_1256c | 3571646 | NE | Spy49_1180c | 6984415 | NE | -           | * |          |         | rhodanese-related sulfurtransferase                                             |
| M5005_Spy_1257c | 3571647 | NE | Spy49_1181c | 6984416 | NE | glcK        | * |          |         | glucokinase/xylose repressor                                                    |
| M5005_Spy_1258c | 3571648 | NE | Spy49_1182c | 6984417 | NE | -           | * |          |         | hypothetical protein M5005_Spy_1258                                             |
| M5005_Spy_1259c | 3571649 | NE | Spy49_1183c | 6984418 | NE | dpr         | * |          |         | non-specific DNA-binding protein/iron-binding ferritin-like antioxidant protein |
| M5005_Spy_1260  | 3571650 | NE | Spy49_1184  | 6984419 | NE | -           | * |          |         | prepilin peptidase                                                              |
| M5005_Spy_1261c | 3571651 | NE | Spy49_1185c | 6984420 | NE | -           | * |          |         | ribosomal RNA large subunit methyltransferase N                                 |
| M5005_Spy_1262c | 3571652 | NE | Spy49_1186c | 6984421 | NE | -           | * |          |         | transcriptional regulator                                                       |
| M5005_Spy_1263c | 3571653 | NC |             |         |    | -           | * |          |         | hypothetical protein M5005_Spy_1263                                             |
| M5005_Spy_1264c | 3571654 | NE | Spy49_1187c | 6984422 | NE | -           | * |          |         | ribose operon repressor, partial                                                |
| M5005_Spy_1265c | 3571655 | NE |             |         |    | -           | * |          |         | ribose operon repressor, partial                                                |
| M5005_Spy_1266c | 3571656 | NE | Spy49_1188c | 6984423 | NE | -           | * |          |         | ATP-dependent protease La                                                       |
| M5005_Spy_1267c | 3571657 | E  | Spy49_1189c | 6984424 | E  | coaD        | * | SSA_0625 | SP_1968 | phosphopantetheine adenylyltransferase                                          |
| M5005_Spy_1268c | 3571658 | NE | Spy49_1190c | 6984425 | NE | -           | * |          |         | methyltransferase                                                               |
| M5005_Spy_1269c | 3571620 | NE | Spy49_1191c | 6984426 | NE | asnA        | * |          |         | asparagine synthetase AsnA                                                      |
| M5005_Spy_1270c | 3571621 | NE | Spy49_1192c | 6984427 | NC | arcC        | * |          |         | carbamate kinase                                                                |
| M5005_Spy_1271c | 3571622 | NE | Spy49_1193c | 6984428 | NE | -           | * |          |         | hypothetical protein M5005_Spy_1271                                             |
| M5005_Spy_1272c | 3571623 | NE | Spy49_1194c | 6984429 | NE | -           | * |          |         | arginine/ornithine antiporter                                                   |
| M5005_Spy_1273c | 3571624 | NE | Spy49_1195c | 6984430 | NC | arcB        | * |          |         | ornithine carbamoyltransferase                                                  |
| M5005_Spy_1274c | 3571625 | NE | Spy49_1196c | 6984431 | NE | -           | * |          |         | acetyltransferase                                                               |
| M5005_Spy_1275c | 3571626 | NE | Spy49_1197c | 6984432 | NE | arcA        | * |          |         | arginine deiminase                                                              |
| M5005_Spy_1276c | 3571627 | NE | Spy49_1198c | 6984433 | NE | -           | * |          |         | Cry/Fnr family transcriptional regulator                                        |
| M5005_Spy_1277  | 3571628 | NE | Spy49_1199  | 6984434 | NE | ahrC.2/argR | * |          |         | arginine repressor ArgR                                                         |
| M5005_Spy_1278c | 3571629 | NE | Spy49_1200c | 6984435 | NE | -           | * |          |         | hypothetical protein M5005_Spy_1278                                             |
| M5005_Spy_1279c | 3571630 | NE | Spy49_1201c | 6984436 | NE | -           | * |          |         | hypothetical protein M5005_Spy_1279                                             |
| M5005_Spy_1280c | 3571631 | NC | Spy49_1202c | 6984437 | NE | yesM        | * |          |         | two-component sensor kinase                                                     |
| M5005_Spy_1281c | 3571632 | NE | Spy49_1203c | 6984438 | NE | yesN        | * |          |         | two-component response regulator                                                |
| M5005_Spy_1282c | 3571633 | NE | Spy49_1204c | 6984439 | NE | msrA        | * |          |         | bifunctional methionine sulfoxide reductase A/B                                 |
| M5005_Spy_1283c | 3571634 | NE | Spy49_1205c | 6984440 | NE | tipA        | * |          |         | thiol:disulfide interchange protein                                             |
| M5005_Spy_1284c | 3571635 | NE | Spy49_1206c | 6984441 | NE | ccdA        | * |          |         | cytochrome C biogenesis protein                                                 |
| M5005_Spy_1285c | 3571636 | NE | Spy49_1207c | 6984442 | NE | -           | * |          |         | hypothetical protein M5005_Spy_1285                                             |
| M5005_Spy_1286c | 3571637 | NE | Spy49_1208c | 6984443 | NE | -           | * |          |         | DNA polymerase                                                                  |
| M5005_Spy_1287c | 3571638 | NE | Spy49_1209c | 6984444 | NE | -           | * |          |         | hypothetical protein M5005_Spy_1287                                             |
| M5005_Spy_1288c | 3571639 | NE | Spy49_1210c | 6984445 | NE | -           | * |          |         | hypothetical protein M5005_Spy_1288                                             |
| M5005_Spy_1289c | 3571602 | NE | Spy49_1211c | 6984446 | NC | -           | * |          |         | hypothetical protein M5005_Spy_1289                                             |
| M5005_Spy_1290c | 3571603 | NE | Spy49_1212c | 6984447 | NE | -           | * |          |         | hypothetical protein M5005_Spy_1290                                             |
| M5005_Spy_1291c | 3571604 | NE | Spy49_1213c | 6984448 | NE | -           | * |          |         | ATP-dependent RNA helicase                                                      |
| M5005_Spy_1292c | 3571605 | E  | Spy49_1215c | 6984449 | E  | valS        | * | SSA_1819 | SP_0568 | valyl-tRNA synthetase                                                           |
| M5005_Spy_1293c | 3571606 | NE | Spy49_1216c | 6984450 | NE | -           | * |          |         | hypothetical protein M5005_Spy_1293                                             |
| M5005_Spy_1294c | 3571607 | NC | Spy49_1217c | 6984451 | NC | -           | * |          |         | ribosomal-protein-serine acetyltransferase                                      |
| M5005_Spy_1295c | 3571608 | NE | Spy49_1218c | 6984452 | NC | -           | * |          |         | hypothetical protein M5005_Spy_1295                                             |
| M5005_Spy_1296c | 3571609 | NE | Spy49_1219c | 6984453 | NC | -           | * |          |         | hypothetical protein M5005_Spy_1296                                             |
| M5005_Spy_1297  | 3571611 | NE | Spy49_1220  | 6984455 | NE | aroA2       | * |          |         | 3-deoxy-7-phosphoheptulonate synthase                                           |
| M5005_Spy_1298  | 3571612 | NE | Spy49_1221  | 6984456 | NE | aroB        | * |          |         | 3-dehydroquinate synthase                                                       |
| M5005_Spy_1299c | 3571613 | NE |             |         |    | -           | * |          |         | hypothetical protein M5005_Spy_1299                                             |
| M5005_Spy_1300c | 3571614 | NE | Spy49_1222c | 6984457 | NE | -           | * |          |         | hypothetical protein M5005_Spy_1300                                             |
| M5005_Spy_1301c | 3571615 | NE | Spy49_1223c | 6984458 | NE | -           | * |          |         | hypothetical protein M5005_Spy_1301                                             |
| M5005_Spy_1302c | 3571616 | NE | Spy49_1224c | 6984459 | NC | -           | * |          |         | SAM-dependent methyltransferase                                                 |
| M5005_Spy_1303c | 3571617 | NE | Spy49_1225c | 6984460 | NE | aroE        | * |          |         | shikimate 5-dehydrogenase                                                       |
| M5005_Spy_1304c | 3571618 | NE | Spy49_1226c | 6984461 | NE | lacZ        | * |          |         | beta-galactosidase                                                              |
| M5005_Spy_1305c | 3571619 | NE | Spy49_1227c | 6984462 | NE | trxR        | * |          |         | two-component response regulator                                                |
| M5005_Spy_1306c | 3571583 | NE | Spy49_1228c | 6984463 | NE | trxS        | * |          |         | two-component sensor kinase                                                     |
| M5005_Spy_1307c | 3571584 | NE | Spy49_1229c | 6984464 | NE | trxT        | * |          |         | hypothetical protein M5005_Spy_1307                                             |
| M5005_Spy_1308c | 3571585 | NE | Spy49_1230c | 6984465 | NE | -           | * |          |         | sugar-binding protein                                                           |
| M5005_Spy_1309c | 3571586 | NE | Spy49_1231c | 6984466 | NC | -           | * |          |         | sugar transporter permease                                                      |
| M5005_Spy_1310c | 3571587 | NE | Spy49_1233c | 6984467 | NE | -           | * |          |         | sugar transporter permease                                                      |
| M5005_Spy_1311  | 3571588 | NE | Spy49_1234  | 6984468 | NE | -           | * |          |         | glucokinase                                                                     |
| M5005_Spy_1312  | 3571589 | NC |             |         |    | -           | * |          |         | hypothetical protein M5005_Spy_1312                                             |
| M5005_Spy_1313c | 3571590 | NE | Spy49_1235c | 6984469 | NE | -           | * |          |         | beta-glucosidase                                                                |
| M5005_Spy_1314c | 3571591 | NE | Spy49_1236c | 6984470 | NC | hyl         | * |          |         | hyaluronoglucosaminidase                                                        |
| M5005_Spy_1315c | 3571592 | NE | Spy49_1237c | 6984471 | NE | -           | * |          |         | GntR family transcriptional regulator                                           |
| M5005_Spy_1316  | 3571593 | NE | Spy49_1238  | 6984472 | NC | -           | * |          |         | hypothetical protein M5005_Spy_1316                                             |
| M5005_Spy_1317  | 3571594 | NE | Spy49_1239  | 6984473 | NC | -           | * |          |         | alpha-mannosidase                                                               |
| M5005_Spy_1318c | 3571595 | NE | Spy49_1240c | 6984474 | NE | rocA        | * |          |         | sensory transduction protein kinase                                             |
| M5005_Spy_1319c | 3571596 | NE | Spy49_1241c | 6984475 | NC | -           | * |          |         | tRNA (uracil-5)-methyltransferase                                               |
| M5005_Spy_1320  | 3571597 | NE | Spy49_1242  | 6984476 | NE | recX        | * |          |         | recombination regulator RecX                                                    |
| M5005_Spy_1321  | 3571598 | C  | Spy49_1243  | 6984477 | NC | -           | * |          | SP_1903 | hypothetical protein M5005_Spy_1321                                             |
| M5005_Spy_1322c | 3571599 | NC | Spy49_1244  | 6984478 | NE | -           | * |          |         | hypothetical protein M5005_Spy_1322                                             |
| M5005_Spy_1323  | 3571600 | NE | Spy49_1245  | 6984479 | C  | -           | * |          |         | transposase                                                                     |
| M5005_Spy_1324  | 3571555 | NC |             |         |    | -           | * |          |         | hypothetical protein M5005_Spy_1324                                             |
| M5005_Spy_1325c | 3571556 | NE | Spy49_1247c | 6984490 | NE | -           | * |          |         | ribosome-associated factor Y                                                    |
| M5005_Spy_1326c | 3571557 | NE | Spy49_1248c | 6984491 | NE | comFC       | * |          |         | competence protein ComF                                                         |
| M5005_Spy_1327c | 3571558 | NE | Spy49_1249c | 6984492 | NE | comFA       | * |          |         | competence protein ComF                                                         |
| M5005_Spy_1328  | 3571559 | NE | Spy49_1250  | 6984493 | NE | -           | * |          |         | Xaa-Pro dipeptidase                                                             |
| M5005_Spy_1329  | 3571560 | NE | Spy49_1251  | 6984494 | NE | cysM        | * |          |         | cysteine synthase                                                               |
| M5005_Spy_1330c | 3571561 | C  | Spy49_1252c | 6984495 | C  | -           | * |          |         | hypothetical protein M5005_Spy_1330                                             |
| M5005_Spy_1331c | 3571562 | NE | Spy49_1253c | 6984496 | NE | -           | * |          |         | peptidyl-prolyl cis-trans isomerase                                             |
| M5005_Spy_1332c | 3571563 | NC | Spy49_1254c | 6984497 | E  | yyqC        | * |          |         | two-component response regulator                                                |
| M5005_Spy_1333c | 3571564 | NE | Spy49_1255c | 6984498 | NE | yyqE        | * |          |         | two-component sensor protein                                                    |
| M5005_Spy_1334c | 3571565 | NE | Spy49_1256c | 6984499 | NE | yyqF        | * |          |         | transporter                                                                     |
| M5005_Spy_1335c | 3571566 | E  | Spy49_1257c | 6984500 | E  | -           | * |          |         | serine/threonine protein kinase                                                 |
| M5005_Spy_1336c | 3571567 | E  | Spy49_1259c | 6984501 | E  | pppL        | * |          | SP_1732 | protein phosphatase 2C                                                          |
| M5005_Spy_1337c | 3571568 | NE | Spy49_1260c | 6984502 | NE | sunL        | * |          | SP_1733 | 16S rRNA m(5)C 967 methyltransferase                                            |
| M5005_Spy_1338c | 3571569 | E  | Spy49_1261c | 6984503 | E  | fmt         | * | SSA_1848 | SP_1735 | methionyl-tRNA formyltransferase                                                |
| M5005_Spy_1339c | 3571570 | C  | Spy49_1262c | 6984504 | C  | priA        | * |          | SP_1736 | primosome assembly protein PriA                                                 |
| M5005_Spy_1340c | 3571571 | NE | Spy49_1263c | 6984505 | NC | -           | * |          |         | DNA-directed RNA polymerase subunit omega                                       |
| M5005_Spy_1341c | 3571572 | E  | Spy49_1265c | 6984506 | E  | gmk         | * | SSA_1851 | SP_1738 | guanylate kinase                                                                |
| M5005_Spy_1342c | 3571535 | NC | Spy49_1266c | 6984507 | NE | -           | * |          |         | hypothetical protein M5005_Spy_1342                                             |
| M5005_Spy_1343c | 3571536 | NE | Spy49_1267c | 6984508 | NE | -           | * |          |         | LysR family transcriptional regulator                                           |



|                 |                         |    |             |                         |       |              |   |          |         |                                                                 |
|-----------------|-------------------------|----|-------------|-------------------------|-------|--------------|---|----------|---------|-----------------------------------------------------------------|
| M5005_Spy_1344  | <a href="#">3571537</a> | NE | Spy49_1268  | <a href="#">6984509</a> | NC    | atoB         | * |          |         | acetyl-CoA acetyltransferase                                    |
| M5005_Spy_1345  | <a href="#">3571538</a> | NE | Spy49_1269  | <a href="#">6984510</a> | NE    | atoD.1       | * |          |         | acetate CoA-transferase subunit alpha                           |
| M5005_Spy_1346  | <a href="#">3571539</a> | NE | Spy49_1270  | <a href="#">6984511</a> | NE    | atoA         | * |          |         | acetate CoA-transferase subunit beta                            |
| M5005_Spy_1347  | <a href="#">3571540</a> | NE | Spy49_1271  | <a href="#">6984512</a> | NE    | -            | * |          |         | 3-hydroxybutyrate dehydrogenase                                 |
| M5005_Spy_1348  | <a href="#">3571541</a> | NE | Spy49_1272  | <a href="#">6984513</a> | NE    | -            | * |          |         | D-beta-hydroxybutyrate permease                                 |
| M5005_Spy_1349  | <a href="#">3571542</a> | NE | Spy49_1273  | <a href="#">6984514</a> | NE    | luxS         | * |          |         | S-ribosylhomocysteinase                                         |
| M5005_Spy_1350c | <a href="#">3571543</a> | NE | Spy49_1274c | <a href="#">6984515</a> | NE    | -            | * |          |         | hypothetical protein M5005_Spy_1350                             |
| M5005_Spy_1351c | <a href="#">3571544</a> | NE | Spy49_1275c | <a href="#">6984516</a> | NE    | -            | * |          |         | methyltransferase                                               |
| M5005_Spy_1352c | <a href="#">3571545</a> | NC | Spy49_1276c | <a href="#">6984583</a> | NC    | -            | * |          |         | cell division initiation protein                                |
| M5005_Spy_1353c | <a href="#">3571546</a> | NE | Spy49_1277c | <a href="#">6984584</a> | NE    | -            | * |          |         | hypothetical protein M5005_Spy_1353                             |
| M5005_Spy_1354  | <a href="#">3571547</a> | NE | Spy49_1278  | <a href="#">6984585</a> | NC    | recU         | * |          |         | Holliday junction-specific endonuclease                         |
| M5005_Spy_1355  | <a href="#">3571548</a> | E  | Spy49_1279  | <a href="#">6984586</a> | E     | <b>pbp1A</b> | * |          |         | multimodular transpeptidase-transglycosylase                    |
| M5005_Spy_1356c | <a href="#">3571549</a> | NE | Spy49_1280c | <a href="#">6984587</a> | NE    | pepC         | * |          |         | aminopeptidase                                                  |
| M5005_Spy_1357c | <a href="#">3571550</a> | E  | Spy49_1281c | <a href="#">6984588</a> | E     | nadE         | * | SSA_1863 |         | NAD synthetase                                                  |
| M5005_Spy_1358c | <a href="#">3571551</a> | E  | Spy49_1282c | <a href="#">6984589</a> | E     | nadE         | * | SSA_1864 |         | nicotinate phosphoribosyltransferase                            |
| M5005_Spy_1359c | <a href="#">3571552</a> | NE | Spy49_1283c | <a href="#">6984590</a> | NE    | -            | * |          |         | amino acid permease                                             |
| M5005_Spy_1360c | <a href="#">3571553</a> | C  | Spy49_1284c | <a href="#">6984591</a> | C     | -            | * | SSA_1865 |         | thioredoxin reductase                                           |
| M5005_Spy_1361c | <a href="#">3571554</a> | E  | Spy49_1285c | <a href="#">6984592</a> | NC    | aapA         | * |          |         | hypothetical protein M5005_Spy_1361                             |
| M5005_Spy_1362c | <a href="#">3571516</a> | NE | Spy49_1286c | <a href="#">6984593</a> | NE    | -            | * |          |         | transporter                                                     |
| M5005_Spy_1363c | <a href="#">3571517</a> | NE | Spy49_1287c | <a href="#">6984594</a> | NE    | -            | * |          |         | amino acid ABC transporter permease                             |
| M5005_Spy_1364c | <a href="#">3571518</a> | E  | Spy49_1289c | <a href="#">6984595</a> | E     | -            | * |          |         | ATP-dependent RNA helicase                                      |
| M5005_Spy_1365c | <a href="#">3571519</a> | E  | Spy49_1290c | <a href="#">6984596</a> | E     | <b>mraY</b>  | * | SSA_1870 |         | phospho-N-acetylmuramoyl-pentapeptide-transferase               |
| M5005_Spy_1366c | <a href="#">3571520</a> | E  | Spy49_1291c | <a href="#">6984597</a> | E     | <b>ftsI</b>  | * | SSA_1871 |         | division specific D,D-transpeptidase/cell division protein ftsI |
| M5005_Spy_1367c | <a href="#">3571521</a> | E  | Spy49_1292c | <a href="#">6984598</a> | NC    | ftsL         | * | SSA_1872 |         | cell division protein                                           |
| M5005_Spy_1368c | <a href="#">3571522</a> | C  | Spy49_1293c | <a href="#">6984599</a> | NE    | mraW         | * |          |         | S-adenosyl-methyltransferase MraW                               |
| M5005_Spy_1369c | <a href="#">3571523</a> | NC | Spy49_1294c | <a href="#">6984600</a> | NE    | -            | * |          |         | hypothetical protein M5005_Spy_1369                             |
| M5005_Spy_1370c | <a href="#">3571524</a> | NE | Spy49_1295c | <a href="#">6984601</a> | NE    | proA         | * |          |         | gamma-glutamyl phosphate reductase                              |
| M5005_Spy_1371c | <a href="#">3571525</a> | NE | Spy49_1296c | <a href="#">6984602</a> | NE    | proB         | * |          |         | gamma-glutamyl kinase                                           |
| M5005_Spy_1372c | <a href="#">3571526</a> | NE | Spy49_1297c | <a href="#">6984603</a> | NE    | proB         | * |          |         | ABC transporter permease                                        |
| M5005_Spy_1373c | <a href="#">3571527</a> | NE | Spy49_1298c | <a href="#">6984604</a> | NE    | -            | * |          |         | ABC transporter ATP-binding protein                             |
| M5005_Spy_1374c | <a href="#">3571528</a> | NE | Spy49_1299c | <a href="#">6984605</a> | NE    | -            | * |          |         | hypothetical protein M5005_Spy_1374                             |
| M5005_Spy_1375c | <a href="#">3571529</a> | NE | Spy49_1300c | <a href="#">6984606</a> | C     | tkk          | * |          |         | transketolase                                                   |
| M5005_Spy_1376c | <a href="#">3571530</a> | NE | Spy49_1301c | <a href="#">6984607</a> | NE    | tal          | * |          |         | translaldolase                                                  |
| M5005_Spy_1377c | <a href="#">3571531</a> | NE | Spy49_1303c | <a href="#">6984608</a> | NE    | -            | * |          |         | trans-acting positive regulator                                 |
| M5005_Spy_1378c | <a href="#">3571532</a> | NE | Spy49_1304c | <a href="#">6984609</a> | NE    | npX          | * |          |         | NADH peroxidase                                                 |
| M5005_Spy_1379c | <a href="#">3571533</a> | NE | Spy49_1305c | <a href="#">6984610</a> | NE    | glpF         | * |          |         | glycerol uptake facilitator protein                             |
| M5005_Spy_1380c | <a href="#">3571534</a> | NE | Spy49_1306c | <a href="#">6984611</a> | NE    | glpO         | * |          |         | alpha-glycerophosphate oxidase                                  |
| M5005_Spy_1381c | <a href="#">3571496</a> | NE | Spy49_1307c | <a href="#">6984612</a> | NE    | glpK         | * |          |         | glycerol kinase                                                 |
| M5005_Spy_1382c | <a href="#">3571497</a> | NE | Spy49_1308c | <a href="#">6984613</a> | NE    | -            | * |          |         | hypothetical protein M5005_Spy_1382                             |
| M5005_Spy_1383c | <a href="#">3571498</a> | NC | Spy49_1309c | <a href="#">6984614</a> | NE    | -            | * |          |         | hypothetical protein M5005_Spy_1383                             |
| M5005_Spy_1384c | <a href="#">3571499</a> | E  | Spy49_1310c | <a href="#">6984615</a> | E     | <b>glyS</b>  | * | SSA_1879 | SP_1474 | glycyl-tRNA synthetase subunit beta                             |
| M5005_Spy_1385c | <a href="#">3571500</a> | E  | Spy49_1311c | <a href="#">6984616</a> | E     | <b>glyQ</b>  | * | SSA_1880 | SP_1475 | glycyl-tRNA synthetase subunit alpha                            |
| M5005_Spy_1386c | <a href="#">3571501</a> | NE | Spy49_1312c | <a href="#">6984617</a> | NE    | -            | * |          |         | hypothetical protein M5005_Spy_1386                             |
| M5005_Spy_1387c | <a href="#">3571502</a> | NE | Spy49_1313c | <a href="#">6984618</a> | NE    | -            | * |          |         | aldo/keto reductase                                             |
| M5005_Spy_1388c | <a href="#">3571503</a> | NE | Spy49_1314c | <a href="#">6984619</a> | NE    | nagA         | * |          |         | N-acetylglucosamine-6-phosphate deacetylase                     |
| M5005_Spy_1389c | <a href="#">3571504</a> | NE | Spy49_1316c | <a href="#">6984620</a> | NE    | -            | * |          |         | sodium-dependent phosphate transporter                          |
| M5005_Spy_1390  | <a href="#">3571505</a> | NE | -           | -                       | -     | -            | * |          |         | hypothetical protein M5005_Spy_1390                             |
| M5005_Spy_1391c | <a href="#">3571506</a> | NE | Spy49_1318c | <a href="#">6984621</a> | NE    | -            | * |          |         | degV family protein                                             |
| M5005_Spy_1392  | <a href="#">3571507</a> | NE | Spy49_1319  | <a href="#">6984622</a> | NE    | -            | * |          |         | TetR family transcriptional regulator                           |
| M5005_Spy_1393c | <a href="#">3571508</a> | NE | Spy49_1320c | <a href="#">6984623</a> | NE    | -            | * |          |         | HAD superfamily hydrolase                                       |
| M5005_Spy_1394c | <a href="#">3571509</a> | NE | Spy49_1321c | <a href="#">6984624</a> | NE    | -            | * |          |         | hypothetical protein M5005_Spy_1394                             |
| M5005_Spy_1395c | <a href="#">3571510</a> | NE | Spy49_1322c | <a href="#">6984625</a> | NE    | lacD.1       | * |          |         | tagatose 1,6-diphosphate aldolase                               |
| M5005_Spy_1396c | <a href="#">3571511</a> | NE | Spy49_1323c | <a href="#">6984626</a> | NE    | lacC1        | * |          |         | tagatose-6-phosphate kinase                                     |
| M5005_Spy_1397c | <a href="#">3571512</a> | NE | Spy49_1324c | <a href="#">6984627</a> | NC    | -            | * |          |         | galactose-6-phosphate isomerase subunit LacB                    |
| M5005_Spy_1398c | <a href="#">3571513</a> | NE | Spy49_1325c | <a href="#">6984628</a> | NE    | lacB.1       | * |          |         | galactose-6-phosphate isomerase subunit LacA                    |
| M5005_Spy_1399c | <a href="#">3571514</a> | NE | Spy49_1326c | <a href="#">6984629</a> | NE    | lacA.1       | * |          |         | PTS system galactose-specific transporter subunit IIC           |
| M5005_Spy_1400c | <a href="#">3571515</a> | NE | Spy49_1327c | <a href="#">6984630</a> | NE    | -            | * |          |         | PTS system galactose-specific transporter subunit IIB           |
| M5005_Spy_1401c | <a href="#">3571477</a> | NE | Spy49_1329c | <a href="#">6984632</a> | NE    | -            | * |          |         | PTS system galactose-specific transporter subunit IIA           |
| M5005_Spy_1402  | <a href="#">3571478</a> | NE | Spy49_1330  | <a href="#">6984633</a> | NE    | lacR.1       | * |          |         | lactose phosphotransferase system repressor                     |
| M5005_Spy_1403c | <a href="#">3571479</a> | NE | -           | -                       | -     | -            | * |          |         | copper chaperone                                                |
| M5005_Spy_1404c | <a href="#">3571480</a> | NE | Spy49_1331c | <a href="#">6984634</a> | NE    | copZ         | * |          |         | copper chaperone                                                |
| M5005_Spy_1405c | <a href="#">3571481</a> | NE | Spy49_1332c | <a href="#">6984635</a> | NE    | copA         | * |          |         | copper-exporting ATPase                                         |
| M5005_Spy_1406c | <a href="#">3571482</a> | NE | Spy49_1334c | <a href="#">6984636</a> | NE    | copY         | * |          |         | copAB ATPase metal-fist type repressor                          |
| M5005_Spy_1407  | <a href="#">3571483</a> | NE | Spy49_1335  | <a href="#">6984637</a> | NE    | -            | * |          |         | esterase                                                        |
| M5005_Spy_1408c | <a href="#">3571484</a> | C  | Spy49_1336c | <a href="#">6984638</a> | NC    | rbfA         | * | SP_0557  |         | ribosome-binding factor A                                       |
| M5005_Spy_1409c | <a href="#">3571485</a> | E  | Spy49_1337c | <a href="#">6984639</a> | E     | <b>infB</b>  | * | SP_0556  |         | translation initiation factor IF-2                              |
| M5005_Spy_1410c | <a href="#">3571486</a> | C  | Spy49_1338c | <a href="#">6984640</a> | NE    | -            | * | SP_0555  |         | hypothetical protein M5005_Spy_1410                             |
| M5005_Spy_1411c | <a href="#">3571487</a> | C  | Spy49_1339c | <a href="#">6984641</a> | NC    | -            | * | SP_0554  |         | hypothetical protein M5005_Spy_1411                             |
| M5005_Spy_1412c | <a href="#">3571488</a> | E  | Spy49_1340c | <a href="#">6984642</a> | E     | <b>nusA</b>  | * | SP_0553  |         | transcription elongation factor NusA                            |
| M5005_Spy_1413c | <a href="#">3571489</a> | NE | Spy49_1341c | <a href="#">6984643</a> | NE    | -            | * |          |         | hypothetical protein M5005_Spy_1413                             |
| M5005_Spy_1414c | <a href="#">3571490</a> | NC | -           | -                       | -     | -            | * |          |         | phage protein                                                   |
| M5005_Spy_1415c | <a href="#">3571491</a> | NE | -           | -                       | sdaD2 | -            | * |          |         | phage-encoded streptodornase                                    |
| M5005_Spy_1416c | <a href="#">3571492</a> | NE | -           | -                       | -     | -            | * |          |         | phage-associated cell wall hydrolase                            |
| M5005_Spy_1417c | <a href="#">3571493</a> | NE | -           | -                       | -     | -            | * |          |         | phage protein                                                   |
| M5005_Spy_1418c | <a href="#">3571494</a> | NE | -           | -                       | -     | -            | * |          |         | phage protein                                                   |
| M5005_Spy_1419c | <a href="#">3571495</a> | NE | -           | -                       | -     | -            | * |          |         | phage protein                                                   |
| M5005_Spy_1420c | <a href="#">3571457</a> | NC | -           | -                       | -     | -            | * |          |         | phage protein                                                   |
| M5005_Spy_1421c | <a href="#">3571458</a> | NE | -           | -                       | -     | -            | * |          |         | phage infection protein                                         |
| M5005_Spy_1422c | <a href="#">3571459</a> | NE | -           | -                       | -     | -            | * |          |         | phage protein                                                   |
| M5005_Spy_1423c | <a href="#">3571460</a> | NE | -           | -                       | -     | -            | * |          |         | hyaluronoglucosaminidase                                        |
| M5005_Spy_1424c | <a href="#">3571461</a> | NE | -           | -                       | -     | -            | * |          |         | phage endopeptidase                                             |
| M5005_Spy_1425c | <a href="#">3571462</a> | NE | -           | -                       | -     | -            | * |          |         | phage protein                                                   |
| M5005_Spy_1426c | <a href="#">3571463</a> | NE | -           | -                       | -     | -            | * |          |         | phage protein                                                   |
| M5005_Spy_1427c | <a href="#">3571464</a> | NE | -           | -                       | -     | -            | * |          |         | phage protein                                                   |
| M5005_Spy_1428c | <a href="#">3571465</a> | NE | -           | -                       | -     | -            | * |          |         | phage protein                                                   |
| M5005_Spy_1429c | <a href="#">3571466</a> | NE | -           | -                       | -     | -            | * |          |         | phage protein                                                   |
| M5005_Spy_1430c | <a href="#">3571467</a> | NE | -           | -                       | -     | -            | * |          |         | phage protein                                                   |
| M5005_Spy_1431c | <a href="#">3571468</a> | NE | -           | -                       | -     | -            | * |          |         | phage protein                                                   |
| M5005_Spy_1432c | <a href="#">3571469</a> | NE | -           | -                       | -     | -            | * |          |         | phage protein                                                   |
| M5005_Spy_1433c | <a href="#">3571470</a> | NE | -           | -                       | -     | -            | * |          |         | phage protein                                                   |
| M5005_Spy_1434c | <a href="#">3571471</a> | NE | -           | -                       | -     | -            | * |          |         | phage protein                                                   |
| M5005_Spy_1435c | <a href="#">3571472</a> | NE | -           | -                       | -     | -            | * |          |         | phage scaffold protein                                          |
| M5005_Spy_1436c | <a href="#">3571473</a> | NE | -           | -                       | -     | -            | * |          |         | phage protein                                                   |
| M5005_Spy_1437c | <a href="#">3571474</a> | NE | -           | -                       | -     | -            | * |          |         | hypothetical protein M5005_Spy_1437                             |
| M5005_Spy_1438c | <a href="#">3571475</a> | NE | -           | -                       | -     | -            | * |          |         | phage protein                                                   |
| M5005_Spy_1439c | <a href="#">3571476</a> | NE | -           | -                       | -     | -            | * |          |         | portal protein                                                  |
| M5005_Spy_1440c | <a href="#">3571438</a> | NE | -           | -                       | -     | -            | * |          |         | terminase large subunit                                         |
| M5005_Spy_1441c | <a href="#">3571439</a> | NE | -           | -                       | -     | -            | * |          |         | phage terminase small subunit                                   |
| M5005_Spy_1442c | <a href="#">3571440</a> | NE | -           | -                       | -     | -            | * |          |         | phage transcriptional activator                                 |
| M5005_Spy_1443c | <a href="#">3571441</a> | NE | -           | -                       | -     | -            | * |          |         | phage protein                                                   |
| M5005_Spy_1444c | <a href="#">3571442</a> | NE | -           | -                       | -     | -            | * |          |         | adenine-specific methyltransferase                              |

|                 |                         |    |             |                         |    |       |          |          |                                                                |
|-----------------|-------------------------|----|-------------|-------------------------|----|-------|----------|----------|----------------------------------------------------------------|
| M5005_Spy_1445c | <a href="#">3571443</a> | NE | -           | -                       | -  | -     | -        | -        | phage protein                                                  |
| M5005_Spy_1446c | <a href="#">3571444</a> | NC | -           | -                       | -  | -     | -        | -        | phage protein                                                  |
| M5005_Spy_1447c | <a href="#">3571445</a> | NE | -           | -                       | -  | -     | -        | -        | phage-related DNA helicase                                     |
| M5005_Spy_1448c | <a href="#">3571446</a> | NE | -           | -                       | -  | -     | -        | -        | hypothetical protein M5005_Spy_1448                            |
| M5005_Spy_1449c | <a href="#">3571447</a> | NE | -           | -                       | -  | -     | -        | -        | DNA primase                                                    |
| M5005_Spy_1450c | <a href="#">3571448</a> | NE | -           | -                       | -  | -     | -        | -        | phage-encoded DNA polymerase                                   |
| M5005_Spy_1451c | <a href="#">3571449</a> | NE | -           | -                       | -  | -     | -        | -        | phage protein                                                  |
| M5005_Spy_1452c | <a href="#">3571450</a> | NE | -           | -                       | -  | -     | -        | -        | phage protein                                                  |
| M5005_Spy_1453c | <a href="#">3571451</a> | NE | -           | -                       | -  | -     | -        | -        | phage protein                                                  |
| M5005_Spy_1454c | <a href="#">3571452</a> | NE | -           | -                       | -  | -     | -        | -        | phage protein                                                  |
| M5005_Spy_1455c | <a href="#">3571453</a> | NC | -           | -                       | -  | -     | -        | -        | phage protein                                                  |
| M5005_Spy_1456c | <a href="#">3571454</a> | NC | -           | -                       | -  | -     | -        | -        | phage protein                                                  |
| M5005_Spy_1457c | <a href="#">3571455</a> | NE | -           | -                       | -  | -     | -        | -        | phage protein                                                  |
| M5005_Spy_1458c | <a href="#">3571456</a> | NC | -           | -                       | -  | -     | -        | -        | phage protein                                                  |
| M5005_Spy_1459c | <a href="#">3571419</a> | NC | -           | -                       | -  | -     | -        | -        | phage protein                                                  |
| M5005_Spy_1460c | <a href="#">3571420</a> | NC | -           | -                       | -  | -     | -        | -        | phage protein                                                  |
| M5005_Spy_1461c | <a href="#">3571421</a> | NE | -           | -                       | -  | -     | -        | -        | phage protein                                                  |
| M5005_Spy_1462  | <a href="#">3571422</a> | NE | -           | -                       | -  | -     | -        | -        | phage protein                                                  |
| M5005_Spy_1463c | <a href="#">3571423</a> | NC | -           | -                       | -  | -     | -        | -        | phage protein                                                  |
| M5005_Spy_1464  | <a href="#">3571424</a> | E  | -           | -                       | -  | -     | -        | -        | Cro/CI family phage transcriptional regulator                  |
| M5005_Spy_1465  | <a href="#">3571425</a> | NE | -           | -                       | -  | -     | -        | -        | phage protein                                                  |
| M5005_Spy_1466  | <a href="#">3571426</a> | NE | -           | -                       | -  | -     | -        | -        | phage protein                                                  |
| M5005_Spy_1467  | <a href="#">3571427</a> | NE | -           | -                       | -  | -     | -        | -        | integrase                                                      |
| M5005_Spy_1468c | <a href="#">3571429</a> | NE | Spy49_1342c | <a href="#">6984645</a> | NE | int.3 | -        | -        | trmB                                                           |
| M5005_Spy_1469c | <a href="#">3571430</a> | E  | Spy49_1343c | <a href="#">6984646</a> | E  | -     | SSA_1903 | SP_0549  | tRNA (guanine-N(7)-)-methyltransferase                         |
| M5005_Spy_1470c | <a href="#">3571431</a> | NE | Spy49_1344c | <a href="#">6984647</a> | NE | -     | -        | -        | phosphotransferase                                             |
| M5005_Spy_1471c | <a href="#">3571432</a> | NE | Spy49_1345c | <a href="#">6984648</a> | NE | -     | -        | -        | protein ecsB                                                   |
| M5005_Spy_1472  | <a href="#">3571433</a> | NE | Spy49_1346  | <a href="#">6984649</a> | NE | hit   | -        | -        | ABC transporter ATP-binding protein                            |
| M5005_Spy_1473  | <a href="#">3571434</a> | NE | Spy49_1347  | <a href="#">6984650</a> | NE | -     | -        | -        | bis(5'-nucleosyl)-tetraphosphatase (asymmetrical)              |
| M5005_Spy_1474c | <a href="#">3571435</a> | NE | Spy49_1348c | <a href="#">6984651</a> | NE | lytR  | -        | -        | hypothetical protein M5005_Spy_1473                            |
| M5005_Spy_1475c | <a href="#">3571436</a> | NE | Spy49_1349c | <a href="#">6984652</a> | NE | -     | -        | -        | LytR family transcriptional regulator                          |
| M5005_Spy_1476c | <a href="#">3571437</a> | NC | Spy49_1350c | <a href="#">6984653</a> | NC | -     | -        | -        | acetyltransferase                                              |
| M5005_Spy_1477c | <a href="#">3571400</a> | NE | Spy49_1351c | <a href="#">6984654</a> | NE | -     | -        | -        | ATP/GTP hydrolase                                              |
| M5005_Spy_1478  | <a href="#">3571401</a> | NE | Spy49_1352  | <a href="#">6984655</a> | NE | -     | -        | -        | guanine-hypoxanthine permease                                  |
| M5005_Spy_1479  | <a href="#">3571402</a> | NE | Spy49_1353  | <a href="#">6984656</a> | NE | manL  | -        | -        | HAD superfamily hydrolase                                      |
| M5005_Spy_1480  | <a href="#">3571403</a> | NE | Spy49_1354  | <a href="#">6984657</a> | NE | manM  | -        | -        | PTS system mannose-specific transporter subunit IIAB           |
| M5005_Spy_1481  | <a href="#">3571404</a> | NE | Spy49_1355  | <a href="#">6984658</a> | NE | manN  | -        | -        | PTS system mannose-specific transporter subunit IIC            |
|                 |                         |    | Spy49_1356  | <a href="#">6984659</a> | NE | -     | -        | -        | PTS system mannose-specific transporter subunit IID            |
| M5005_Spy_1482  | <a href="#">3571405</a> | NE | Spy49_1357  | <a href="#">6984660</a> | NE | manO  | -        | -        | hypothetical protein M5005_Spy_1482                            |
| M5005_Spy_1483  | <a href="#">3571406</a> | E  | Spy49_1358  | <a href="#">6984661</a> | E  | serS  | SSA_1925 | SP_0411  | seryl-tRNA synthetase                                          |
| M5005_Spy_1484c | <a href="#">3571407</a> | E  | Spy49_1359c | <a href="#">6984662</a> | NC | accD  | SSA_1930 | SP_0427  | acetyl-CoA carboxylase subunit alpha                           |
| M5005_Spy_1485c | <a href="#">3571408</a> | E  | Spy49_1360c | <a href="#">6984743</a> | E  | accA  | SSA_1931 | SP_0426  | acetyl-CoA carboxylase subunit beta                            |
| M5005_Spy_1486c | <a href="#">3571409</a> | E  | Spy49_1361c | <a href="#">6984744</a> | E  | accC  | SSA_1932 | -        | acetyl-CoA carboxylase biotin carboxylase subunit              |
| M5005_Spy_1487c | <a href="#">3571410</a> | C  | Spy49_1362c | <a href="#">6984745</a> | NC | fabZ  | SSA_1933 | SP_0424  | (3R)-hydroxymyristoyl-ACP dehydratase                          |
| M5005_Spy_1488c | <a href="#">3571411</a> | E  | Spy49_1363c | <a href="#">6984746</a> | NC | accB  | SSA_1934 | SP_0423  | acetyl-CoA carboxylase biotin carboxyl carrier protein subunit |
| M5005_Spy_1489c | <a href="#">3571412</a> | E  | Spy49_1364c | <a href="#">6984747</a> | E  | fabF  | SSA_1935 | SP_0422  | 3-oxoacyl-ACP synthase                                         |
| M5005_Spy_1490c | <a href="#">3571413</a> | E  | Spy49_1365c | <a href="#">6984748</a> | E  | fabG  | SSA_1936 | SP_0421  | 3-ketoacyl-ACP reductase                                       |
| M5005_Spy_1491c | <a href="#">3571414</a> | E  | Spy49_1366c | <a href="#">6984749</a> | E  | fabD  | SSA_1937 | SP_0420  | ACP S-malonyltransferase                                       |
| M5005_Spy_1492c | <a href="#">3571415</a> | C  | Spy49_1367c | <a href="#">6984750</a> | E  | fabK  | SSA_1938 | SP_0419  | enoyl-ACP reductase                                            |
| M5005_Spy_1493c | <a href="#">3571416</a> | E  | Spy49_1368c | <a href="#">6984751</a> | NC | acpP  | SSA_1940 | SP_0418  | acyl carrier protein                                           |
| M5005_Spy_1494c | <a href="#">3571417</a> | E  | Spy49_1369c | <a href="#">6984752</a> | E  | fabH  | SSA_1940 | SP_0417  | 3-oxoacyl-ACP synthase                                         |
| M5005_Spy_1495c | <a href="#">3571418</a> | NC | Spy49_1370c | <a href="#">6984753</a> | NE | -     | -        | -        | MarR family transcriptional regulator                          |
| M5005_Spy_1496c | <a href="#">3571380</a> | E  | Spy49_1371c | <a href="#">6984754</a> | E  | phaB  | -        | SP_0415  | enoyl-CoA hydratase                                            |
| M5005_Spy_1497c | <a href="#">3571381</a> | E  | Spy49_1372c | <a href="#">6984755</a> | E  | dnaJ  | -        | SSA_2005 | molecular chaperone DnaJ                                       |
|                 |                         |    | Spy49_1373  | <a href="#">6984756</a> | NC | -     | -        | -        | -                                                              |
| M5005_Spy_1498c | <a href="#">3571382</a> | E  | Spy49_1374c | <a href="#">6984757</a> | E  | dnaK  | SSA_2007 | SP_0517  | molecular chaperone DnaK                                       |
| M5005_Spy_1499c | <a href="#">3571383</a> | E  | Spy49_1375c | <a href="#">6984758</a> | E  | grpE  | -        | -        | heat shock protein GrpE                                        |
| M5005_Spy_1500c | <a href="#">3571384</a> | C  | Spy49_1376c | <a href="#">6984759</a> | NE | hrcA  | -        | -        | heat-inducible transcription repressor                         |
| M5005_Spy_1501c | <a href="#">3571385</a> | NE | Spy49_1377c | <a href="#">6984760</a> | NE | -     | -        | -        | N-acetylmuramoyl-L-alanine amidase                             |
| M5005_Spy_1502c | <a href="#">3571386</a> | NE | Spy49_1378c | <a href="#">6984761</a> | NE | -     | -        | -        | D-alanyl-D-alanine carboxypeptidase                            |
| M5005_Spy_1503c | <a href="#">3571387</a> | NE | Spy49_1379c | <a href="#">6984762</a> | NE | -     | -        | -        | phosphoglycerate mutase                                        |
| M5005_Spy_1504c | <a href="#">3571388</a> | NE | Spy49_1380c | <a href="#">6984763</a> | NE | -     | -        | -        | hypothetical protein M5005_Spy_1504                            |
| M5005_Spy_1505c | <a href="#">3571389</a> | NE | Spy49_1381c | <a href="#">6984764</a> | NE | -     | -        | -        | hypothetical protein M5005_Spy_1505                            |
| M5005_Spy_1506c | <a href="#">3571390</a> | E  | Spy49_1382c | <a href="#">6984765</a> | E  | gatB  | SSA_0571 | SP_0436  | aspartyl/glutamyl-tRNA amidotransferase subunit B              |
| M5005_Spy_1507c | <a href="#">3571391</a> | E  | Spy49_1383c | <a href="#">6984766</a> | E  | gatA  | SSA_0570 | SP_0437  | aspartyl/glutamyl-tRNA amidotransferase subunit A              |
| M5005_Spy_1508c | <a href="#">3571392</a> | E  | Spy49_1384c | <a href="#">6984767</a> | NC | gatC  | SSA_0569 | SP_0438  | aspartyl/glutamyl-tRNA amidotransferase subunit C              |
| M5005_Spy_1509c | <a href="#">3571393</a> | NE | Spy49_1385c | <a href="#">6984768</a> | NE | -     | -        | -        | pyruvate, phosphate dikinase, partial                          |
| M5005_Spy_1510c | <a href="#">3571394</a> | NC | -           | -                       | -  | -     | -        | -        | pyruvate, phosphate dikinase                                   |
| M5005_Spy_1511c | <a href="#">3571395</a> | NE | Spy49_1386c | <a href="#">6984769</a> | NE | -     | -        | -        | pyrazinamidase/nicotinamidase                                  |
| M5005_Spy_1512c | <a href="#">3571396</a> | C  | Spy49_1387c | <a href="#">6984770</a> | E  | codY  | -        | SP_1584  | transcriptional repressor CodY                                 |
| M5005_Spy_1513c | <a href="#">3571397</a> | NE | Spy49_1388c | <a href="#">6984771</a> | NE | -     | -        | -        | aminotransferase                                               |
| M5005_Spy_1514  | <a href="#">3571398</a> | NE | Spy49_1389  | <a href="#">6984772</a> | NE | -     | -        | -        | universal stress protein                                       |
| M5005_Spy_1515c | <a href="#">3571399</a> | NE | Spy49_1390c | <a href="#">6984773</a> | NE | -     | -        | -        | HAD superfamily hydrolase                                      |
| M5005_Spy_1516  | <a href="#">3571361</a> | NE | Spy49_1391  | <a href="#">6984774</a> | NE | asnB  | -        | -        | L-asparaginase                                                 |
| M5005_Spy_1517c | <a href="#">3571362</a> | NE | Spy49_1392c | <a href="#">6984775</a> | NE | -     | -        | -        | lambiotic transport permease                                   |
| M5005_Spy_1518c | <a href="#">3571363</a> | NE | Spy49_1393c | <a href="#">6984776</a> | NE | -     | -        | -        | transporter                                                    |
| M5005_Spy_1519c | <a href="#">3571364</a> | NE | Spy49_1394c | <a href="#">6984777</a> | C  | recG  | -        | -        | ATP-dependent DNA helicase RecG                                |
| M5005_Spy_1520  | <a href="#">3571365</a> | NE | -           | -                       | -  | -     | -        | -        | hypothetical protein M5005_Spy_1520                            |
| M5005_Spy_1521c | <a href="#">3571366</a> | NE | Spy49_1395c | <a href="#">6984778</a> | NE | -     | -        | -        | cobalt ABC transporter ATP-binding protein                     |
| M5005_Spy_1522c | <a href="#">3571367</a> | NE | Spy49_1396c | <a href="#">6984779</a> | NE | -     | -        | -        | cobalt transporter cbiQ                                        |
| M5005_Spy_1523c | <a href="#">3571368</a> | NE | Spy49_1397c | <a href="#">6984780</a> | NE | -     | -        | -        | permease                                                       |
| M5005_Spy_1524c | <a href="#">3571369</a> | NE | Spy49_1398c | <a href="#">6984781</a> | NE | cycC  | -        | -        | ABC transporter ATP-binding protein                            |
| M5005_Spy_1525c | <a href="#">3571370</a> | NE | Spy49_1400c | <a href="#">6984782</a> | NE | cycD  | -        | -        | ABC transporter ATP-binding protein                            |
| M5005_Spy_1526c | <a href="#">3571371</a> | NE | Spy49_1401c | <a href="#">6984783</a> | NE | fhuC  | -        | -        | ferrichrome ABC transporter ATP-binding protein                |
| M5005_Spy_1527c | <a href="#">3571372</a> | NE | Spy49_1402c | <a href="#">6984784</a> | NE | fhuB2 | -        | -        | ferrichrome transporter permease                               |
| M5005_Spy_1528c | <a href="#">3571373</a> | NE | Spy49_1403c | <a href="#">6984785</a> | NE | fhuD2 | -        | -        | ferrichrome-binding protein                                    |
| M5005_Spy_1529c | <a href="#">3571374</a> | NE | -           | -                       | -  | shp   | -        | -        | heme binding protein                                           |
| M5005_Spy_1530c | <a href="#">3571375</a> | NE | Spy49_1405c | <a href="#">6984786</a> | NE | -     | -        | -        | Fe3+-siderophore transporter                                   |
| M5005_Spy_1531c | <a href="#">3571376</a> | NE | Spy49_1407c | <a href="#">6984787</a> | NE | isp2  | -        | -        | hypothetical protein M5005_Spy_1531                            |
| M5005_Spy_1532c | <a href="#">3571377</a> | NC | Spy49_1408c | <a href="#">6984788</a> | E  | alr   | SSA_0548 | SP_1698  | alanine racemase                                               |
| M5005_Spy_1533c | <a href="#">3571378</a> | NC | Spy49_1409c | <a href="#">6984789</a> | E  | acpS  | SSA_0547 | SP_1699  | 4'-phosphopantetheinyl transferase                             |
| M5005_Spy_1534c | <a href="#">3571379</a> | E  | Spy49_1410c | <a href="#">6984790</a> | E  | secA  | SSA_0543 | SP_1702  | preprotein translocase subunit SecA                            |
| M5005_Spy_1535c | <a href="#">3571341</a> | NC | -           | -                       | -  | -     | -        | -        | hypothetical protein M5005_Spy_1535                            |
| M5005_Spy_1536c | <a href="#">3571342</a> | NE | -           | -                       | -  | -     | -        | -        | transposase                                                    |
| M5005_Spy_1537c | <a href="#">3571343</a> | NE | -           | -                       | -  | -     | -        | -        | transposase, partial                                           |
| M5005_Spy_1538c | <a href="#">3571344</a> | NE | Spy49_1412c | <a href="#">6984791</a> | NE | pmi   | -        | -        | mannose-6-phosphate isomerase                                  |
| M5005_Spy_1539c | <a href="#">3571345</a> | NE | Spy49_1413c | <a href="#">6984792</a> | NE | scrK  | -        | -        | fructokinase                                                   |
| M5005_Spy_1540c | <a href="#">3571346</a> | NE | Spy49_1414c | <a href="#">6984793</a> | NE | endoS | -        | -        | endo-beta-N-acetylglucosaminidase F2                           |
| M5005_Spy_1541c | <a href="#">3571347</a> | NC | -           | -                       | -  | -     | -        | -        | hypothetical protein M5005_Spy_1541                            |
| M5005_Spy_1542c | <a href="#">3571348</a> | NE | Spy49_1415c | <a href="#">6984794</a> | NE | scrA  | -        | -        | PTS system sucrose-specific transporter subunit IIAB           |
| M5005_Spy_1543  | <a href="#">3571349</a> | NE | Spy49_1416  | <a href="#">6984795</a> | NC | scrB  | -        | -        | sucrose-6-phosphate hydrolase                                  |
| M5005_Spy_1544  | <a href="#">3571350</a> | NE | Spy49_1417  | <a href="#">6984796</a> | NE | scrR  | -        | -        | sucrose operon repressor                                       |

|                 |                         |    |             |                         |    |        |   |          |                                            |  |
|-----------------|-------------------------|----|-------------|-------------------------|----|--------|---|----------|--------------------------------------------|--|
| M5005_Spy_1545c | <a href="#">3571351</a> | C  | Spy49_1418c | <a href="#">6984797</a> | NE | nusB   | * |          |                                            |  |
| M5005_Spy_1546c | <a href="#">3571352</a> | NC | Spy49_1419c | <a href="#">6984798</a> | NE | -      | * | SP_0433  | transcription antitermination protein NusB |  |
| M5005_Spy_1547c | <a href="#">3571353</a> | NE | Spy49_1420c | <a href="#">6984799</a> | NE | efp    | * |          | Gls24 family general stress protein        |  |
| M5005_Spy_1548c | <a href="#">3571354</a> | NE | Spy49_1421c | <a href="#">6984800</a> | NE | comEB  | * |          | elongation factor P                        |  |
| M5005_Spy_1549c | <a href="#">3571355</a> | NE | Spy49_1422c | <a href="#">6984801</a> | NE | pepP   | * |          | competence protein ComE                    |  |
| M5005_Spy_1550c | <a href="#">3571356</a> | NE | Spy49_1423c | <a href="#">6984802</a> | NE | uvrA   | * |          | Xaa-Pro dipeptidase                        |  |
| M5005_Spy_1551  | <a href="#">3571357</a> | E  | Spy49_1424  | <a href="#">6984803</a> | C  | corA   | * | SP_0185  | excinuclease ABC subunit A                 |  |
| M5005_Spy_1552  | <a href="#">3571358</a> | NE | Spy49_1425  | <a href="#">6984804</a> | NE | -      | * |          | magnesium and cobalt transporter           |  |
| M5005_Spy_1553c | <a href="#">3571359</a> | NC | Spy49_1426c | <a href="#">6984805</a> | NC | rpsR   | * |          | hypothetical protein M5005_Spy_1552        |  |
| M5005_Spy_1554c | <a href="#">3571360</a> | NC | Spy49_1427c | <a href="#">6984806</a> | C  | ssb3   | * | SSA_0438 | 30S ribosomal protein S18                  |  |
| M5005_Spy_1555c | <a href="#">3571322</a> | NC | Spy49_1428c | <a href="#">6984807</a> | NC | rpsF   | * | SP_1540  | single-stranded DNA-binding protein        |  |
| M5005_Spy_1556c | <a href="#">3571323</a> | NE | Spy49_1429c | <a href="#">6984808</a> | NE | -      | * |          | 30S ribosomal protein S6                   |  |
| M5005_Spy_1557  | <a href="#">3571324</a> | NE | Spy49_1430  | <a href="#">6984809</a> | NE | mutY   | * |          | hypothetical protein M5005_Spy_1556        |  |
| M5005_Spy_1558  | <a href="#">3571325</a> | NE | Spy49_1431  | <a href="#">6984810</a> | NE | -      | * |          | A/G-specific adenine glycosylase           |  |
| M5005_Spy_1559c | <a href="#">3571326</a> | NE | Spy49_1432c | <a href="#">6984811</a> | NE | trx    | * |          | transcriptional regulator                  |  |
| M5005_Spy_1560c | <a href="#">3571327</a> | NE | Spy49_1433c | <a href="#">6984812</a> | NE | -      | * |          | thioredoxin                                |  |
| M5005_Spy_1561c | <a href="#">3571328</a> | NE | Spy49_1434c | <a href="#">6984813</a> | NE | mutS2  | * |          | phosphatidylglycerophosphatase B           |  |
| M5005_Spy_1562c | <a href="#">3571329</a> | NE | Spy49_1435c | <a href="#">6984814</a> | NE | -      | * |          | DNA mismatch repair protein                |  |
| M5005_Spy_1563c | <a href="#">3571330</a> | NE | Spy49_1436c | <a href="#">6984815</a> | NE | -      | * |          | colicin V production protein               |  |
| M5005_Spy_1564  | <a href="#">3571331</a> | C  | Spy49_1437  | <a href="#">6984816</a> | E  | -      | * |          | hypothetical protein M5005_Spy_1563        |  |
| M5005_Spy_1565  | <a href="#">3571332</a> | E  | Spy49_1438  | <a href="#">6984817</a> | E  | spi    | * | SP_0402  | ribonuclease HIII                          |  |
| M5005_Spy_1566  | <a href="#">3571333</a> | NE | Spy49_1439  | <a href="#">6984818</a> | NE | recD   | * |          | signal peptidase I                         |  |
| M5005_Spy_1567  | <a href="#">3571334</a> | NE | Spy49_1440  | <a href="#">6984819</a> | NE | -      | * |          | exodeoxyribonuclease V subunit alpha       |  |
| M5005_Spy_1568c | <a href="#">3571335</a> | NE | Spy49_1441c | <a href="#">6984820</a> | NC | dinP   | * |          | hypothetical protein M5005_Spy_1567        |  |
| M5005_Spy_1569  | <a href="#">3571336</a> | NE | Spy49_1442  | <a href="#">6984821</a> | NC | pfl    | * |          | DNA polymerase IV                          |  |
| M5005_Spy_1570c | <a href="#">3571337</a> | NE | Spy49_1443c | <a href="#">6984822</a> | NE | -      | * |          | formate acetyltransferase                  |  |
| M5005_Spy_1571c | <a href="#">3571338</a> | NE | Spy49_1444c | <a href="#">6984903</a> | NE | cppA   | * |          | penicillin-binding protein                 |  |
| M5005_Spy_1572  | <a href="#">3571339</a> | NE | Spy49_1445  | <a href="#">6984904</a> | NE | -      | * |          | c3-degrading proteinase                    |  |
| M5005_Spy_1573c | <a href="#">3571340</a> | C  | Spy49_1447c | <a href="#">6984905</a> | NC | glpF.2 | * | SP_1491  | hypothetical protein M5005_Spy_1572        |  |
| M5005_Spy_1574c | <a href="#">3571302</a> | NC |             |                         |    | -      | * |          | aquaporin                                  |  |
| M5005_Spy_1575c | <a href="#">3571303</a> | NE | Spy49_1449c | <a href="#">6984906</a> | NE | norA   | * |          | universal stress protein                   |  |
| M5005_Spy_1576  | <a href="#">3571304</a> | NE | Spy49_1450  | <a href="#">6984907</a> | NE | srv    | * |          | quinolone resistance protein               |  |
| M5005_Spy_1577  | <a href="#">3571305</a> | NE | Spy49_1451  | <a href="#">6984908</a> | NE | pepXP  | * |          | Crp/Fnr family transcriptional regulator   |  |
| M5005_Spy_1578c | <a href="#">3571306</a> | NE | Spy49_1452c | <a href="#">6984909</a> | NE | -      | * |          | x-prolyl-dipeptidyl aminopeptidase         |  |
| M5005_Spy_1579  | <a href="#">3571307</a> | NE | Spy49_1453  | <a href="#">6984910</a> | NE | -      | * |          | Cro/Ci family transcriptional regulator    |  |
|                 |                         |    | Spy49_1454c | <a href="#">6984911</a> | NE | -      | * |          | transcriptional regulator                  |  |
|                 |                         |    | Spy49_1455  | <a href="#">6984912</a> | NE | -      | * |          |                                            |  |
|                 |                         |    | Spy49_1456  | <a href="#">6984913</a> | NE | -      | * |          |                                            |  |
|                 |                         |    | Spy49_1457c | <a href="#">6984914</a> | NE | -      | * |          |                                            |  |
|                 |                         |    | Spy49_1458c | <a href="#">6984915</a> | NE | -      | * |          |                                            |  |
|                 |                         |    | Spy49_1459c | <a href="#">6984916</a> | NE | -      | * |          |                                            |  |
|                 |                         |    | Spy49_1460c | <a href="#">6984917</a> | NE | -      | * |          |                                            |  |
|                 |                         |    | Spy49_1461c | <a href="#">6984918</a> | NE | -      | * |          |                                            |  |
|                 |                         |    | Spy49_1462c | <a href="#">6984919</a> | NE | -      | * |          |                                            |  |
|                 |                         |    | Spy49_1463c | <a href="#">6984920</a> | NC | -      | * |          |                                            |  |
|                 |                         |    | Spy49_1464c | <a href="#">6984921</a> | NE | -      | * |          |                                            |  |
|                 |                         |    | Spy49_1465c | <a href="#">6984922</a> | NC | -      | * |          |                                            |  |
|                 |                         |    | Spy49_1466c | <a href="#">6984923</a> | NC | -      | * |          |                                            |  |
|                 |                         |    | Spy49_1467c | <a href="#">6984924</a> | NC | -      | * |          |                                            |  |
|                 |                         |    | Spy49_1468c | <a href="#">6984925</a> | NE | -      | * |          |                                            |  |
|                 |                         |    | Spy49_1470c | <a href="#">6984926</a> | NE | -      | * |          |                                            |  |
|                 |                         |    | Spy49_1471c | <a href="#">6984927</a> | NE | -      | * |          |                                            |  |
|                 |                         |    | Spy49_1472c | <a href="#">6984928</a> | NE | -      | * |          |                                            |  |
|                 |                         |    | Spy49_1474c | <a href="#">6984929</a> | NE | -      | * |          |                                            |  |
|                 |                         |    | Spy49_1475c | <a href="#">6984930</a> | NE | -      | * |          |                                            |  |
|                 |                         |    | Spy49_1476c | <a href="#">6984931</a> | NE | -      | * |          |                                            |  |
|                 |                         |    | Spy49_1477c | <a href="#">6984932</a> | NE | -      | * |          |                                            |  |
|                 |                         |    | Spy49_1478c | <a href="#">6984933</a> | NE | -      | * |          |                                            |  |
|                 |                         |    | Spy49_1479c | <a href="#">6984934</a> | NE | -      | * |          |                                            |  |
|                 |                         |    | Spy49_1480c | <a href="#">6984935</a> | NE | -      | * |          |                                            |  |
|                 |                         |    | Spy49_1481c | <a href="#">6984936</a> | NE | -      | * |          |                                            |  |
|                 |                         |    | Spy49_1482c | <a href="#">6984937</a> | NE | -      | * |          |                                            |  |
|                 |                         |    | Spy49_1483c | <a href="#">6984938</a> | NE | -      | * |          |                                            |  |
|                 |                         |    | Spy49_1484c | <a href="#">6984939</a> | NE | -      | * |          |                                            |  |
|                 |                         |    | Spy49_1485c | <a href="#">6984940</a> | NE | -      | * |          |                                            |  |
|                 |                         |    | Spy49_1486c | <a href="#">6984941</a> | NE | -      | * |          |                                            |  |
|                 |                         |    | Spy49_1487c | <a href="#">6984942</a> | NE | -      | * |          |                                            |  |
|                 |                         |    | Spy49_1488c | <a href="#">6984943</a> | NE | -      | * |          |                                            |  |
|                 |                         |    | Spy49_1489c | <a href="#">6984944</a> | NE | -      | * |          |                                            |  |
|                 |                         |    | Spy49_1491c | <a href="#">6984945</a> | NE | -      | * |          |                                            |  |
|                 |                         |    | Spy49_1492c | <a href="#">6984946</a> | NE | -      | * |          |                                            |  |
|                 |                         |    | Spy49_1493c | <a href="#">6984947</a> | NE | -      | * |          |                                            |  |
|                 |                         |    | Spy49_1494c | <a href="#">6984948</a> | NC | -      | * |          |                                            |  |
|                 |                         |    | Spy49_1496c | <a href="#">6984949</a> | NE | -      | * |          |                                            |  |
|                 |                         |    | Spy49_1497c | <a href="#">6984950</a> | NC | -      | * |          |                                            |  |
|                 |                         |    | Spy49_1498c | <a href="#">6984951</a> | NE | -      | * |          |                                            |  |
|                 |                         |    | Spy49_1499c | <a href="#">6984952</a> | NE | -      | * |          |                                            |  |
|                 |                         |    | Spy49_1500c | <a href="#">6984953</a> | NC | -      | * |          |                                            |  |
|                 |                         |    | Spy49_1501c | <a href="#">6984954</a> | NE | -      | * |          |                                            |  |
|                 |                         |    | Spy49_1502c | <a href="#">6984955</a> | NC | -      | * |          |                                            |  |
|                 |                         |    | Spy49_1504c | <a href="#">6984956</a> | NE | -      | * |          |                                            |  |
|                 |                         |    | Spy49_1505c | <a href="#">6984957</a> | NC | -      | * |          |                                            |  |
|                 |                         |    | Spy49_1506c | <a href="#">6984958</a> | NE | -      | * |          |                                            |  |
|                 |                         |    | Spy49_1507c | <a href="#">6984959</a> | NE | -      | * |          |                                            |  |
|                 |                         |    | Spy49_1509c | <a href="#">6984960</a> | NE | -      | * |          |                                            |  |
|                 |                         |    | Spy49_1510c | <a href="#">6984961</a> | NC | -      | * |          |                                            |  |
|                 |                         |    | Spy49_1511c | <a href="#">6984962</a> | NC | -      | * |          |                                            |  |
|                 |                         |    | Spy49_1512c | <a href="#">6984963</a> | NE | -      | * |          |                                            |  |
|                 |                         |    | Spy49_1513c | <a href="#">6984964</a> | NE | -      | * |          |                                            |  |
|                 |                         |    | Spy49_1514c | <a href="#">6984965</a> | NE | -      | * |          |                                            |  |
|                 |                         |    | Spy49_1516c | <a href="#">6984966</a> | NC | -      | * |          |                                            |  |
|                 |                         |    | Spy49_1517c | <a href="#">6984967</a> | NE | -      | * |          |                                            |  |
|                 |                         |    | Spy49_1518c | <a href="#">6984968</a> | NE | -      | * |          |                                            |  |
|                 |                         |    | Spy49_1520c | <a href="#">6984969</a> | NC | -      | * |          |                                            |  |
|                 |                         |    | Spy49_1521c | <a href="#">6984970</a> | NE | -      | * |          |                                            |  |
|                 |                         |    | Spy49_1522  | <a href="#">6984971</a> | C  | -      | * |          |                                            |  |
|                 |                         |    | Spy49_1525  | <a href="#">6984972</a> | NE | -      | * |          |                                            |  |
|                 |                         |    | Spy49_1526  | <a href="#">6984973</a> | NE | -      | * |          |                                            |  |
|                 |                         |    | Spy49_1528c | <a href="#">6984974</a> | NC | -      | * |          |                                            |  |
|                 |                         |    | Spy49_1529  | <a href="#">6984975</a> | NC | -      | * |          |                                            |  |
|                 |                         |    | Spy49_1530  | <a href="#">6984976</a> | NE | -      | * |          |                                            |  |
|                 |                         |    | Spy49_1531  | <a href="#">6984977</a> | NE | -      | * |          |                                            |  |

|                 |                         |    |             |                         |    |           |   |          |                                                            |
|-----------------|-------------------------|----|-------------|-------------------------|----|-----------|---|----------|------------------------------------------------------------|
| M5005_Spy_1580  | <a href="#">3571308</a> | NE | Spy49_1532  | <a href="#">6984978</a> | NE | -         | * |          | hypothetical protein M5005_Spy_1580                        |
| M5005_Spy_1581c | <a href="#">3571309</a> | NE | Spy49_1533c | <a href="#">6984979</a> | NE | -         | * |          | MerR family transcriptional regulator                      |
| M5005_Spy_1582c | <a href="#">3571310</a> | NE | Spy49_1534c | <a href="#">6984980</a> | NC | dnaQ      | * |          | DNA polymerase III subunit epsilon                         |
| M5005_Spy_1583c | <a href="#">3571311</a> | NE | Spy49_1535c | <a href="#">6984981</a> | NC | -         | * |          | hypothetical protein M5005_Spy_1583                        |
|                 |                         |    | Spy49_1536c | <a href="#">6984982</a> | NE | -         | * |          |                                                            |
|                 |                         |    | Spy49_1537c | <a href="#">6985063</a> | NE | -         | * |          |                                                            |
| M5005_Spy_1584  | <a href="#">3571312</a> | NE | Spy49_1538  | <a href="#">6985064</a> | NE | -         | * |          | NAD(FAD)-utilizing dehydrogenase                           |
| M5005_Spy_1585c | <a href="#">3571313</a> | NE | Spy49_1540c | <a href="#">6985065</a> | NE | deoC      | * |          | deoxyribose-phosphate aldolase                             |
| M5005_Spy_1586c | <a href="#">3571314</a> | NE | Spy49_1541c | <a href="#">6985066</a> | NE | nupC      | * |          | nucleoside permease                                        |
| M5005_Spy_1587c | <a href="#">3571315</a> | NE | Spy49_1542c | <a href="#">6985067</a> | NE | udp       | * |          | uridine phosphorylase                                      |
| M5005_Spy_1588c | <a href="#">3571316</a> | NC | -           | -                       | -  | -         | * |          | hypothetical protein M5005_Spy_1588                        |
| M5005_Spy_1589  | <a href="#">3571317</a> | NE | Spy49_1543  | <a href="#">6985068</a> | NE | crpR      | * |          | GntR family transcriptional regulator                      |
| M5005_Spy_1590  | <a href="#">3571318</a> | NE | Spy49_1544  | <a href="#">6985069</a> | NE | rpsN      | * |          | 30S ribosomal protein S14                                  |
| M5005_Spy_1591c | <a href="#">3571319</a> | E  | Spy49_1545c | <a href="#">6985070</a> | NC | gcp       | * | SP_0129  | DNA-binding/iron metalloprotein/AP endonuclease            |
| M5005_Spy_1592c | <a href="#">3571320</a> | NE | Spy49_1546c | <a href="#">6985071</a> | NE | -         | * |          | ribosomal-protein-alanine acetyltransferase                |
| M5005_Spy_1593c | <a href="#">3571321</a> | C  | Spy49_1547c | <a href="#">6985072</a> | E  | -         | * |          | glycoprotease                                              |
| M5005_Spy_1594  | <a href="#">3571284</a> | E  | Spy49_1548  | <a href="#">6985073</a> | NC | -         | * | SP_0122  | hypothetical protein M5005_Spy_1594                        |
| M5005_Spy_1595  | <a href="#">3571285</a> | E  | Spy49_1549  | <a href="#">6985074</a> | E  | -         | * | SSA_0312 | Zn-dependent hydrolase                                     |
| M5005_Spy_1596c | <a href="#">3571286</a> | NE | Spy49_1550c | <a href="#">6985075</a> | NE | glnA      | * |          | glutamine synthetase                                       |
| M5005_Spy_1597c | <a href="#">3571287</a> | NE | Spy49_1551c | <a href="#">6985076</a> | NE | glnR      | * |          | MerR family transcriptional regulator                      |
| M5005_Spy_1598c | <a href="#">3571288</a> | NE | Spy49_1552c | <a href="#">6985077</a> | NE | -         | * |          | hypothetical protein M5005_Spy_1598                        |
| M5005_Spy_1599c | <a href="#">3571289</a> | E  | Spy49_1553c | <a href="#">6985078</a> | NC | pgk       | * | SSA_0302 | phosphoglycerate kinase                                    |
| M5005_Spy_1600c | <a href="#">3571290</a> | NE | Spy49_1554c | <a href="#">6985079</a> | NE | lppC      | * |          | acid phosphatase                                           |
| M5005_Spy_1601c | <a href="#">3571291</a> | NE | Spy49_1555c | <a href="#">6985080</a> | NE | -         | * |          | membrane protease                                          |
| M5005_Spy_1602c | <a href="#">3571292</a> | E  | Spy49_1556c | <a href="#">6985081</a> | E  | -         | * | SP_0443  | kinase                                                     |
| M5005_Spy_1603c | <a href="#">3571293</a> | NE | Spy49_1557c | <a href="#">6985082</a> | NC | asp       | * |          | alkaline-shock protein                                     |
| M5005_Spy_1604c | <a href="#">3571294</a> | NC | -           | -                       | -  | -         | * |          | hypothetical protein M5005_Spy_1604                        |
| M5005_Spy_1605c | <a href="#">3571295</a> | NE | -           | -                       | -  | -         | * |          | transposase                                                |
| M5005_Spy_1606c | <a href="#">3571296</a> | NE | Spy49_1558c | <a href="#">6985083</a> | NE | rpmB      | * |          | 50S ribosomal protein L28                                  |
| M5005_Spy_1607c | <a href="#">3571297</a> | E  | Spy49_1559c | <a href="#">6985084</a> | E  | fba       | * | SSA_1992 | fructose-bisphosphate aldolase                             |
| M5005_Spy_1608c | <a href="#">3571299</a> | NE | Spy49_1560c | <a href="#">6985086</a> | NE | -         | * |          | alpha/beta hydrolase                                       |
| M5005_Spy_1610c | <a href="#">3571301</a> | NE | Spy49_1561c | <a href="#">6985087</a> | NE | pyrG      | * |          | CTP synthase, partial                                      |
| M5005_Spy_1611c | <a href="#">3571270</a> | NE | Spy49_1562c | <a href="#">6985088</a> | NE | rpoE      | * |          | DNA-directed RNA polymerase subunit delta                  |
| M5005_Spy_1612c | <a href="#">3571271</a> | NE | Spy49_1563c | <a href="#">6985089</a> | NE | tig/ropA  | * |          | trigger factor                                             |
| M5005_Spy_1613  | <a href="#">3571272</a> | NE | Spy49_1564  | <a href="#">6985090</a> | NE | -         | * |          | mechanosensitive ion channel MscS                          |
| M5005_Spy_1614c | <a href="#">3571273</a> | NE | Spy49_1565c | <a href="#">6985091</a> | NE | -         | * |          | hypothetical protein M5005_Spy_1614                        |
| M5005_Spy_1615c | <a href="#">3571274</a> | NE | Spy49_1566c | <a href="#">6985092</a> | NE | -         | * |          | hypothetical protein M5005_Spy_1615                        |
| M5005_Spy_1616c | <a href="#">3571275</a> | NE | Spy49_1567c | <a href="#">6985093</a> | NE | thiD      | * |          | phosphomethylpyrimidine kinase                             |
| M5005_Spy_1617c | <a href="#">3571276</a> | NE | Spy49_1568c | <a href="#">6985094</a> | NE | truA      | * |          | tRNA pseudouridine synthase A                              |
| M5005_Spy_1618c | <a href="#">3571277</a> | NE | Spy49_1569c | <a href="#">6985095</a> | NE | comX.2    | * |          | competence-specific sigma factor                           |
| M5005_Spy_1619  | <a href="#">3571251</a> | NC | -           | -                       | -  | -         | * |          | hypothetical protein M5005_Spy_1619                        |
| M5005_Spy_1620c | <a href="#">3571252</a> | NE | Spy49_1571c | <a href="#">6985102</a> | NE | -         | * |          | glycerate kinase                                           |
| M5005_Spy_1621  | <a href="#">3571253</a> | NE | Spy49_1572  | <a href="#">6985103</a> | NE | hsdR      | * |          | type I restriction-modification system restriction subunit |
| M5005_Spy_1622  | <a href="#">3571254</a> | NE | Spy49_1573  | <a href="#">6985104</a> | NE | hsdS      | * |          | type I restriction-modification system specificity subunit |
| M5005_Spy_1623  | <a href="#">3571255</a> | NE | Spy49_1574  | <a href="#">6985105</a> | NE | hsdM      | * |          | type I restriction-modification system methylation subunit |
| M5005_Spy_1624c | <a href="#">3571256</a> | NE | Spy49_1575c | <a href="#">6985106</a> | NE | -         | * |          | hypothetical protein M5005_Spy_1624                        |
| M5005_Spy_1625c | <a href="#">3571257</a> | NE | Spy49_1576c | <a href="#">6985107</a> | NE | salR      | * |          | transcriptional regulatory protein                         |
| M5005_Spy_1626c | <a href="#">3571258</a> | NE | Spy49_1577c | <a href="#">6985108</a> | NE | salK      | * |          | sensory transduction protein kinase                        |
| M5005_Spy_1627c | <a href="#">3571259</a> | NE | Spy49_1578c | <a href="#">6985109</a> | NE | salY      | * |          | ABC transporter permease                                   |
| M5005_Spy_1628c | <a href="#">3571260</a> | NE | Spy49_1579c | <a href="#">6985110</a> | NE | salX      | * |          | ABC transporter ATP-binding protein                        |
| M5005_Spy_1629c | <a href="#">3571261</a> | NE | Spy49_1580c | <a href="#">6985111</a> | NE | salX/salT | * |          | lambiotic transport ATP-binding protein                    |
| M5005_Spy_1630c | <a href="#">3571262</a> | NE | Spy49_1582c | <a href="#">6985112</a> | NE | salB      | * |          | serine (threonine) dehydratase                             |
| M5005_Spy_1631c | <a href="#">3571263</a> | NC | Spy49_1583c | <a href="#">6985113</a> | NC | salA      | * |          | lambiotic salivaricin A                                    |
| M5005_Spy_1632c | <a href="#">3571264</a> | NE | Spy49_1584c | <a href="#">6985114</a> | NE | lacG      | * |          | 6-phospho-beta-galactosidase                               |
| M5005_Spy_1633c | <a href="#">3571265</a> | NE | Spy49_1585c | <a href="#">6985115</a> | NE | lacE      | * |          | PTS system lactose-specific transporter subunit IIIC       |
| M5005_Spy_1634c | <a href="#">3571266</a> | NE | Spy49_1586c | <a href="#">6985116</a> | NE | lacF      | * |          | PTS system lactose-specific transporter subunit IIIA       |
| M5005_Spy_1635c | <a href="#">3571267</a> | NE | Spy49_1587c | <a href="#">6985117</a> | NE | lacD.2    | * |          | tagatose 1,6-diphosphate aldolase                          |
| M5005_Spy_1636c | <a href="#">3571268</a> | NE | Spy49_1588c | <a href="#">6985118</a> | NE | lacC.2    | * |          | tagatose-6-phosphate kinase                                |
| M5005_Spy_1637c | <a href="#">3571269</a> | NE | Spy49_1589c | <a href="#">6985119</a> | NE | lacB.2    | * |          | galactose-6-phosphate isomerase subunit LacB               |
| M5005_Spy_1638c | <a href="#">3571231</a> | NE | Spy49_1590c | <a href="#">6985120</a> | NE | lacA.2    | * |          | galactose-6-phosphate isomerase subunit LacA               |
| M5005_Spy_1639  | <a href="#">3571232</a> | NE | Spy49_1591  | <a href="#">6985121</a> | NE | lacR.2    | * |          | lactose phosphotransferase system repressor                |
| M5005_Spy_1640  | <a href="#">3571233</a> | NE | Spy49_1592  | <a href="#">6985122</a> | NE | -         | * |          | DNA-damage-inducible protein J                             |
| M5005_Spy_1641  | <a href="#">3571234</a> | NE | Spy49_1593  | <a href="#">6985123</a> | NE | -         | * |          | hypothetical protein M5005_Spy_1641                        |
| M5005_Spy_1642  | <a href="#">3571235</a> | NE | Spy49_1594  | <a href="#">6985124</a> | NE | -         | * |          | DNA integration/recombination/inversion protein            |
| M5005_Spy_1643  | <a href="#">3571237</a> | NC | -           | -                       | -  | -         | * |          | DNA integration/recombination/inversion protein            |
| M5005_Spy_1644c | <a href="#">3571236</a> | NC | -           | -                       | -  | -         | * |          | hypothetical protein M5005_Spy_1644                        |
| M5005_Spy_1645  | <a href="#">3571238</a> | NC | -           | -                       | -  | -         | * |          | DNA integration/recombination/inversion protein            |
| M5005_Spy_1646c | <a href="#">3571239</a> | NC | Spy49_1595c | <a href="#">6985125</a> | E  | rpsI      | * | SP_0295  | 30S ribosomal protein S9                                   |
| M5005_Spy_1647c | <a href="#">3571240</a> | NC | Spy49_1596c | <a href="#">6985126</a> | NC | rplM      | * |          | 50S ribosomal protein L13                                  |
| M5005_Spy_1648c | <a href="#">3571241</a> | NC | Spy49_1597c | <a href="#">6985127</a> | NC | -         | * |          | Cro/CI family transcriptional regulator                    |
| M5005_Spy_1649c | <a href="#">3571242</a> | NE | Spy49_1598c | <a href="#">6985128</a> | NE | -         | * |          | hypothetical protein M5005_Spy_1649                        |
| M5005_Spy_1650c | <a href="#">3571243</a> | NE | Spy49_1599c | <a href="#">6985129</a> | NC | -         | * |          | degV family protein                                        |
| M5005_Spy_1651c | <a href="#">3571244</a> | NE | Spy49_1600c | <a href="#">6985130</a> | NE | -         | * |          | hypothetical protein M5005_Spy_1651                        |
| M5005_Spy_1652c | <a href="#">3571245</a> | NE | Spy49_1601c | <a href="#">6985131</a> | NE | -         | * |          | 23S rRNA methyltransferase                                 |
| M5005_Spy_1653c | <a href="#">3571246</a> | NE | Spy49_1602c | <a href="#">6985132</a> | NE | -         | * |          | hypothetical protein M5005_Spy_1653                        |
| M5005_Spy_1654c | <a href="#">3571247</a> | NE | Spy49_1603c | <a href="#">6985133</a> | NE | -         | * |          | hypothetical protein M5005_Spy_1654                        |
| M5005_Spy_1655c | <a href="#">3571248</a> | E  | Spy49_1604c | <a href="#">6985134</a> | E  | cysS      | * | SSA_2044 | cysteinyl-tRNA synthetase                                  |
| M5005_Spy_1656c | <a href="#">3571249</a> | NE | Spy49_1605c | <a href="#">6985135</a> | NE | -         | * |          | hypothetical protein M5005_Spy_1656                        |
| M5005_Spy_1657c | <a href="#">3571250</a> | NE | -           | -                       | -  | -         | * |          | hypothetical protein M5005_Spy_1657                        |
| M5005_Spy_1658c | <a href="#">3571212</a> | NC | Spy49_1606c | <a href="#">6985136</a> | NC | cysE      | * |          | serine acetyltransferase                                   |
| M5005_Spy_1659c | <a href="#">3571213</a> | NE | Spy49_1607c | <a href="#">6985137</a> | NE | -         | * |          | hypothetical protein M5005_Spy_1659                        |
| M5005_Spy_1660c | <a href="#">3571214</a> | NE | Spy49_1608c | <a href="#">6985138</a> | NE | pnp       | * |          | polynucleotide phosphorylase                               |
| M5005_Spy_1661c | <a href="#">3571215</a> | NE | Spy49_1609c | <a href="#">6985139</a> | NE | -         | * |          | translaldolase                                             |
| M5005_Spy_1662c | <a href="#">3571216</a> | NE | Spy49_1610c | <a href="#">6985140</a> | NE | ulaA      | * |          | PTS system ascorbate-specific transporter subunit IIC      |
| M5005_Spy_1663c | <a href="#">3571217</a> | NE | Spy49_1611c | <a href="#">6985141</a> | NE | -         | * |          | PTS system transporter subunit IIB                         |
| M5005_Spy_1664c | <a href="#">3571218</a> | NE | Spy49_1612c | <a href="#">6985142</a> | NE | -         | * |          | PTS system, mannitol (cryptic)-specific IIA component      |
| M5005_Spy_1665c | <a href="#">3571219</a> | NC | -           | -                       | -  | -         | * |          | hypothetical protein M5005_Spy_1665                        |
| M5005_Spy_1666c | <a href="#">3571220</a> | NC | Spy49_1613c | <a href="#">6985223</a> | NE | rpsO      | * |          | 30S ribosomal protein S15                                  |
| M5005_Spy_1667c | <a href="#">3571221</a> | NC | Spy49_1614c | <a href="#">6985224</a> | NE | -         | * |          | hypothetical protein M5005_Spy_1667                        |
| M5005_Spy_1668  | <a href="#">3571222</a> | E  | -           | -                       | -  | -         | * |          | transcriptional regulator                                  |
| M5005_Spy_1669  | <a href="#">3571223</a> | E  | Spy49_1615  | <a href="#">6985225</a> | C  | def       | * | SSA_2061 | peptide deformylase                                        |
| M5005_Spy_1670c | <a href="#">3571224</a> | NE | Spy49_1616c | <a href="#">6985226</a> | NE | -         | * |          | oxidoreductase                                             |
| M5005_Spy_1671c | <a href="#">3571225</a> | NE | Spy49_1617c | <a href="#">6985227</a> | NE | -         | * |          | MarR family transcriptional regulator                      |
| M5005_Spy_1672c | <a href="#">3571226</a> | E  | Spy49_1618c | <a href="#">6985228</a> | E  | polC      | * | SSA_2066 | DNA polymerase III PolC                                    |
| M5005_Spy_1673c | <a href="#">3571227</a> | E  | Spy49_1619c | <a href="#">6985229</a> | E  | proS      | * | SSA_2069 | prolyl-tRNA synthetase                                     |
| M5005_Spy_1674c | <a href="#">3571228</a> | NE | Spy49_1620c | <a href="#">6985230</a> | NE | eep       | * |          | pheromone-processing membrane metalloprotease              |
| M5005_Spy_1675c | <a href="#">3571229</a> | E  | Spy49_1621c | <a href="#">6985231</a> | E  | cdsA      | * | SSA_2072 | phosphatidate cytidylyltransferase                         |
| M5005_Spy_1676c | <a href="#">3571230</a> | E  | Spy49_1622c | <a href="#">6985232</a> | E  | uppS      | * | SSA_2073 | undecaprenyl pyrophosphate synthase                        |
| M5005_Spy_1677c | <a href="#">3571192</a> | NE | Spy49_1624c | <a href="#">6985233</a> | NE | yajC      | * |          | preprotein translocase subunit YajC                        |
| M5005_Spy_1678c | <a href="#">3571193</a> | NE | Spy49_1625c | <a href="#">6985234</a> | NE | -         | * |          | thioredoxin                                                |
| M5005_Spy_1680c | <a href="#">3571195</a> | NE | Spy49_1626c | <a href="#">6985235</a> | NE | pulA      | * |          | pullulanase, partial                                       |
| M5005_Spy_1681c | <a href="#">3571196</a> | NE | Spy49_1627c | <a href="#">6985236</a> | NE | dexB      | * |          | glucan 1,6-alpha-glucosidase                               |

|                 |         |    |             |         |    |         |   |          |         |                                                                           |
|-----------------|---------|----|-------------|---------|----|---------|---|----------|---------|---------------------------------------------------------------------------|
| M5005_Spy_1682c | 3571197 | NE | Spy49_1628c | 6985237 | NE | msmK    | * |          |         | multiple sugar transport ATP-binding protein                              |
| M5005_Spy_1683c | 3571198 | NE | Spy49_1629c | 6985238 | NE | lrp     | * |          |         | hypothetical protein M5005_Spy_1683                                       |
| M5005_Spy_1684  | 3571199 | NE | Spy49_1630  | 6985239 | NE | ska     | * |          |         | streptokinase                                                             |
| M5005_Spy_1685c | 3571200 | NE | Spy49_1631c | 6985240 | NE | dtb     | * |          |         | D-tyrosyl-tRNA(Tyr) deacylase                                             |
| M5005_Spy_1686c | 3571201 | E  | Spy49_1632c | 6985241 | C  | relA    | * |          |         | GTP pyrophosphokinase                                                     |
| M5005_Spy_1687c | 3571202 | NE | Spy49_1633c | 6985242 | NE | sclA    | * |          |         | hypothetical protein M5005_Spy_1687                                       |
| M5005_Spy_1690  | 3571205 | NE | Spy49_1634  | 6985243 | NE | nrpD12  | * |          |         | flavoprotein NrdI                                                         |
| M5005_Spy_1691c | 3571206 | NE | Spy49_1635c | 6985244 | NE | -       | * |          |         | exodeoxyribonuclease III                                                  |
| M5005_Spy_1693c | 3571208 | NE | Spy49_1636c | 6985245 | NE | -       | * |          |         | PTS system glucose-specific transporter subunit IIABC                     |
| M5005_Spy_1694c | 3571209 | NE | Spy49_1637c | 6985246 | NE | -       | * |          |         | 16S ribosomal RNA methyltransferase RsmE                                  |
| M5005_Spy_1695c | 3571210 | NE | Spy49_1638c | 6985247 | NE | prmA    | * |          |         | 50S ribosomal protein L11 methyltransferase                               |
| M5005_Spy_1696c | 3571211 | NE | Spy49_1639c | 6985248 | NE | -       | * |          |         | hypothetical protein M5005_Spy_1696                                       |
|                 |         |    | Spy49_1640c | 6985249 | NE | -       |   |          |         |                                                                           |
|                 |         |    | Spy49_1641c | 6985250 | NE | -       |   |          |         |                                                                           |
|                 |         |    | Spy49_1642c | 6985251 | NE | -       |   |          |         |                                                                           |
|                 |         |    | Spy49_1643c | 6985252 | NC | -       |   |          |         |                                                                           |
|                 |         |    | Spy49_1644c | 6985253 | NE | -       |   |          |         |                                                                           |
|                 |         |    | Spy49_1646c | 6985254 | NE | -       |   |          |         |                                                                           |
|                 |         |    | Spy49_1647c | 6985255 | NE | -       |   |          |         |                                                                           |
|                 |         |    | Spy49_1649c | 6985256 | NE | -       |   |          |         |                                                                           |
|                 |         |    | Spy49_1651  | 6985257 | NE | -       |   |          |         |                                                                           |
|                 |         |    | Spy49_1652  | 6985258 | NC | -       |   |          |         |                                                                           |
| M5005_Spy_1697  | 3571174 | NE | Spy49_1653  | 6985259 | NE | papB    | * |          |         | para-aminobenzoate synthetase component I/4-amino-4-deoxychorismate lyase |
| M5005_Spy_1698  | 3571175 | NC | Spy49_1654  | 6985260 | NE | trpG    | * |          |         | anthranilate synthase component II                                        |
| M5005_Spy_1699  | 3571176 | NE | Spy49_1655  | 6985261 | NE | -       | * |          |         | recombination factor protein RarA                                         |
| M5005_Spy_1700  | 3571178 | NE | Spy49_1656  | 6985263 | NE | pai1    | * |          |         | acetyltransferase                                                         |
| M5005_Spy_1701  | 3571179 | NE | Spy49_1657  | 6985264 | NE | flaR    | * |          |         | topology modulation protein                                               |
| M5005_Spy_1702  | 3571180 | NE | Spy49_1658c | 6985265 | NE | smeZ    | * |          |         | mitogenic exotoxin Z                                                      |
| M5005_Spy_1703c | 3571181 | NE | Spy49_1659c | 6985266 | NE | -       | * |          |         | hypothetical protein M5005_Spy_1703                                       |
| M5005_Spy_1704  | 3571182 | NE | Spy49_1660  | 6985267 | NE | dppA    | * |          |         | dipeptide-binding protein                                                 |
| M5005_Spy_1705  | 3571183 | NE | Spy49_1661  | 6985268 | NE | dppB    | * |          |         | dipeptide transporter permease                                            |
| M5005_Spy_1706  | 3571184 | NE | Spy49_1662  | 6985269 | NE | dppC    | * |          |         | dipeptide transporter permease                                            |
| M5005_Spy_1707  | 3571185 | NE | Spy49_1663  | 6985270 | NE | dppD    | * |          |         | dipeptide transport ATP-binding protein                                   |
| M5005_Spy_1708  | 3571186 | NE | Spy49_1664  | 6985271 | NE | dppE    | * |          |         | dipeptide transport ATP-binding protein                                   |
| M5005_Spy_1709c | 3571187 | NE | Spy49_1665c | 6985272 | NE | -       | * |          |         | hypothetical protein M5005_Spy_1709                                       |
| M5005_Spy_1710c | 3571188 | NE | Spy49_1666c | 6985273 | NE | -       | * |          |         | histidine triad protein                                                   |
| M5005_Spy_1711c | 3571189 | NE | Spy49_1667c | 6985274 | NE | lmb     | * |          |         | laminin binding protein                                                   |
| M5005_Spy_1712c | 3571190 | NE | -           | -       | -  | -       | * |          |         | transposase                                                               |
| M5005_Spy_1713c | 3571191 | NC | -           | -       | -  | -       | * |          |         | hypothetical protein M5005_Spy_1713                                       |
| M5005_Spy_1714c | 3571154 | NE | Spy49_1668c | 6985275 | NE | -       | * |          |         | cell surface protein                                                      |
| M5005_Spy_1715c | 3571155 | NE | Spy49_1669c | 6985276 | NE | scpA    | * |          |         | CSA peptidase                                                             |
| M5005_Spy_1716  | 3571156 | NE | Spy49_1670c | 6985277 | NE | -       | * |          |         | transposase                                                               |
| M5005_Spy_1717  | 3571157 | NC | -           | -       | -  | -       | * |          |         | transposase, partial                                                      |
| M5005_Spy_1718c | 3571158 | NE | Spy49_1671c | 6985278 | NE | sic1.01 | * |          |         | inhibitor of complement protein                                           |
| M5005_Spy_1719c | 3571159 | NE | Spy49_1672c | 6985279 | NE | emm1.0  | * |          |         | M protein                                                                 |
| M5005_Spy_1720c | 3571160 | NE | Spy49_1673c | 6985280 | NE | mga     | * |          |         | trans-acting positive regulator                                           |
| M5005_Spy_1721  | 3571161 | NC | Spy49_1674c | 6985281 | NE | -       | * |          |         | hypothetical protein M5005_Spy_1721                                       |
| M5005_Spy_1722c | 3571162 | NE | -           | -       | -  | -       | * |          |         | hypothetical protein M5005_Spy_1722                                       |
| M5005_Spy_1723c | 3571163 | NE | Spy49_1675c | 6985282 | NE | isp     | * |          |         | hypothetical protein M5005_Spy_1723                                       |
| M5005_Spy_1724c | 3571164 | NE | Spy49_1676c | 6985283 | NE | ihk     | * |          |         | two component system histidine kinase                                     |
| M5005_Spy_1725c | 3571165 | NE | Spy49_1677c | 6985284 | NE | irr     | * |          |         | two-component response regulator                                          |
| M5005_Spy_1726c | 3571166 | NE | Spy49_1678c | 6985285 | NE | -       | * |          |         | ABC transporter permease                                                  |
| M5005_Spy_1727c | 3571167 | NE | Spy49_1679c | 6985286 | NE | -       | * |          |         | ABC transporter ATP-binding protein                                       |
| M5005_Spy_1728c | 3571168 | NE | Spy49_1680c | 6985287 | NE | -       | * |          |         | periplasmic protein of efflux system                                      |
| M5005_Spy_1729c | 3571169 | NE | Spy49_1681c | 6985288 | NE | -       | * |          |         | hypothetical protein M5005_Spy_1729                                       |
| M5005_Spy_1730c | 3571170 | NE | Spy49_1682c | 6985289 | NE | -       | * |          |         | hypothetical protein M5005_Spy_1730                                       |
| M5005_Spy_1731  | 3571171 | NE | Spy49_1683c | 6985290 | NE | grm     | * |          |         | hypothetical protein M5005_Spy_1731                                       |
|                 |         |    | Spy49_1684c | 6985291 | NE | -       |   |          |         |                                                                           |
|                 |         |    | Spy49_1686  | 6985292 | NE | -       |   |          |         |                                                                           |
| M5005_Spy_1732c | 3571172 | C  | Spy49_1687c | 6985293 | NE | prsA    | * |          |         | foldase PrsA                                                              |
| M5005_Spy_1733c | 3571173 | NE | Spy49_1688c | 6985294 | NE | -       | * |          |         | hypothetical protein M5005_Spy_1733                                       |
| M5005_Spy_1734c | 3571135 | NE | Spy49_1689c | 6985295 | C  | -       | * |          |         | hypothetical protein M5005_Spy_1734                                       |
| M5005_Spy_1735c | 3571136 | NE | Spy49_1690c | 6985296 | NE | speB    | * |          |         | exotoxin B                                                                |
| M5005_Spy_1736  | 3571137 | NC | -           | -       | -  | -       | * |          |         | hypothetical protein M5005_Spy_1736                                       |
| M5005_Spy_1737  | 3571138 | NE | Spy49_1691  | 6985297 | NE | rgg     | * |          |         | transcriptional regulator                                                 |
| M5005_Spy_1738c | 3571139 | NE | Spy49_1692c | 6985298 | NE | spd     | * |          |         | phage-associated deoxyribonuclease                                        |
| M5005_Spy_1739  | 3571140 | NC | Spy49_1693  | 6985299 | NC | -       | * |          |         | hypothetical protein M5005_Spy_1739                                       |
| M5005_Spy_1740  | 3571141 | NE | Spy49_1694  | 6985300 | NE | -       | * |          |         | low temperature requirement C protein                                     |
| M5005_Spy_1741c | 3571142 | NE | Spy49_1695c | 6985301 | NE | glfA    | * |          |         | glycerol dehydrogenase                                                    |
| M5005_Spy_1742c | 3571143 | NE | Spy49_1696c | 6985302 | NE | mipB    | * |          |         | fructose-6-phosphate aldolase                                             |
| M5005_Spy_1743c | 3571144 | NE | Spy49_1697c | 6985383 | NE | pflD    | * |          |         | formate acetyltransferase                                                 |
| M5005_Spy_1744c | 3571145 | NE | Spy49_1698c | 6985384 | NE | -       | * |          |         | PTS system cellobiose-specific transporter subunit IIC                    |
| M5005_Spy_1745c | 3571146 | NE | Spy49_1699c | 6985385 | NE | -       | * |          |         | PTS system cellobiose-specific transporter subunit IIB                    |
| M5005_Spy_1746c | 3571147 | NE | Spy49_1700c | 6985386 | NE | -       | * |          |         | PTS system cellobiose-specific transporter subunit IIIA                   |
| M5005_Spy_1747c | 3571148 | NE | Spy49_1701c | 6985387 | NE | -       | * |          |         | sorbitol operon regulator                                                 |
| M5005_Spy_1748c | 3571149 | NE | Spy49_1702c | 6985388 | NE | -       | * |          |         | DeoR family transcriptional regulator                                     |
| M5005_Spy_1749  | 3571150 | NE | Spy49_1703  | 6985389 | NE | -       | * |          |         | pyruvate formate-lyase activating enzyme                                  |
| M5005_Spy_1750  | 3571151 | NE | -           | -       | -  | -       | * |          |         | hypothetical protein M5005_Spy_1750                                       |
| M5005_Spy_1751c | 3571152 | NC | Spy49_1704c | 6985390 | NC | secE    | * |          |         | preprotein translocase subunit SecE                                       |
| M5005_Spy_1752c | 3571153 | NC | Spy49_1705c | 6985391 | NC | rpmG    | * |          |         | 50S ribosomal protein L33                                                 |
| M5005_Spy_1753c | 3571116 | NE | Spy49_1706c | 6985392 | NC | bbp2A   | * |          |         | multimodular transpeptidase-transglycosylase                              |
| M5005_Spy_1754c | 3571117 | NE | Spy49_1707c | 6985393 | NE | -       | * |          |         | translation initiation inhibitor                                          |
| M5005_Spy_1755  | 3571118 | NE | Spy49_1708  | 6985394 | NE | -       | * |          |         | hypothetical protein M5005_Spy_1755                                       |
| M5005_Spy_1756  | 3571119 | NE | Spy49_1709  | 6985395 | NE | -       | * |          |         | ribosomal large subunit pseudouridine synthase D                          |
| M5005_Spy_1757c | 3571120 | NE | Spy49_1710c | 6985396 | NE | -       | * |          |         | hypothetical protein M5005_Spy_1757                                       |
| M5005_Spy_1758  | 3571121 | NE | Spy49_1713  | 6985397 | NE | -       | * |          |         | dipeptidase B                                                             |
| M5005_Spy_1759c | 3571122 | NE | Spy49_1714c | 6985398 | NE | -       | * |          |         | MuTr family transcriptional regulator                                     |
| M5005_Spy_1760c | 3571123 | E  | -           | -       | -  | -       | * |          |         | MuTr family transcriptional regulator                                     |
| M5005_Spy_1761c | 3571124 | E  | Spy49_1715c | 6985399 | E  | groEL   | * | SSA_0226 | SP_1906 | molecular chaperone GroEL                                                 |
| M5005_Spy_1762c | 3571125 | E  | Spy49_1716c | 6985400 | NC | groES   | * | SSA_0225 |         | co-chaperonin GroES                                                       |
| M5005_Spy_1763c | 3571126 | NE | Spy49_1717c | 6985401 | NE | clpC    | * |          |         | negative regulator of genetic competence                                  |
| M5005_Spy_1764c | 3571127 | NE | Spy49_1718c | 6985402 | NE | ctsR    | * |          |         | transcriptional regulator                                                 |
| M5005_Spy_1765c | 3571128 | NE | Spy49_1719c | 6985403 | NE | csp     | * |          |         | cold shock protein                                                        |
| M5005_Spy_1766c | 3571129 | NC | -           | -       | -  | -       | * |          |         | hypothetical protein M5005_Spy_1766                                       |
| M5005_Spy_1767c | 3571130 | NE | Spy49_1720c | 6985405 | NE | -       | * |          |         | transposase                                                               |
| M5005_Spy_1768  | 3571132 | NE | Spy49_1721  | 6985406 | NE | ahpC    | * |          |         | peroxiredoxin reductase (NAD(P)H)                                         |
| M5005_Spy_1769  | 3571133 | NE | Spy49_1722  | 6985407 | NE | ahpF    | * |          |         | peroxiredoxin reductase (NAD(P)H)                                         |
| M5005_Spy_1770c | 3571134 | NE | Spy49_1723c | 6985408 | NE | hutI    | * |          |         | imidazolonepropionase                                                     |
| M5005_Spy_1771  | 3571097 | NE | Spy49_1724  | 6985409 | NE | hutU    | * |          |         | urocanate hydratase                                                       |
| M5005_Spy_1772  | 3571098 | NE | Spy49_1725  | 6985410 | NE | -       | * |          |         | glutamate formiminotransferase                                            |
| M5005_Spy_1773  | 3571099 | NE | Spy49_1726  | 6985411 | NE | -       | * |          |         | formiminotetrahydrofolate cyclodeaminase                                  |



|                 |                         |    |             |                         |    |                  |   |          |         |                                                                    |
|-----------------|-------------------------|----|-------------|-------------------------|----|------------------|---|----------|---------|--------------------------------------------------------------------|
| M5005_Spy_1774  | <a href="#">3571100</a> | NE | Spy49_1727  | <a href="#">6985412</a> | NE | fts.2            | * |          |         | formate--tetrahydrofolate ligase                                   |
| M5005_Spy_1775  | <a href="#">3571101</a> | NE | Spy49_1728  | <a href="#">6985413</a> | NE | -                | - |          |         | hypothetical protein M5005_Spy_1775                                |
| M5005_Spy_1776  | <a href="#">3571102</a> | NE | Spy49_1729  | <a href="#">6985414</a> | NE | -                | * |          |         | amino acid permease                                                |
| M5005_Spy_1777  | <a href="#">3571103</a> | NE | Spy49_1730  | <a href="#">6985415</a> | NE | hutH             | * |          |         | histidine ammonia-lyase                                            |
| M5005_Spy_1778  | <a href="#">3571104</a> | NE | Spy49_1731  | <a href="#">6985416</a> | NE | hutG             | * |          |         | formimidoylglutamate                                               |
| M5005_Spy_1779c | <a href="#">3571105</a> | NE | Spy49_1732c | <a href="#">6985417</a> | NE | -                | * |          |         | LuxR family transcriptional regulator                              |
| M5005_Spy_1780  | <a href="#">3571106</a> | E  | Spy49_1733  | <a href="#">6985418</a> | E  | <b>rpsB</b>      | * | SSA_2203 | SP_2215 | 30S ribosomal protein S2                                           |
| M5005_Spy_1781  | <a href="#">3571107</a> | E  | Spy49_1734  | <a href="#">6985419</a> | E  | <b>tsf</b>       | * | SSA_2202 | SP_2214 | elongation factor Ts                                               |
| M5005_Spy_1782c | <a href="#">3571108</a> | NE | Spy49_1735c | <a href="#">6985420</a> | NC | pepO             | * |          |         | neutral endopeptidase                                              |
| M5005_Spy_1783c | <a href="#">3571109</a> | NC | Spy49_1736c | <a href="#">6985421</a> | E  | <b>dexS</b>      | * |          |         | trehalose-6-phosphate hydrolase                                    |
| M5005_Spy_1784c | <a href="#">3571110</a> | NE | Spy49_1737c | <a href="#">6985422</a> | NC | -                | * |          |         | PTS system, trehalose-specific IIBC component                      |
| M5005_Spy_1785  | <a href="#">3571111</a> | NE | Spy49_1738  | <a href="#">6985423</a> | NE | -                | * |          |         | trehalose operon transcriptional repressor                         |
| M5005_Spy_1786c | <a href="#">3571112</a> | NE | Spy49_1739c | <a href="#">6985424</a> | NE | -                | - |          |         | MarR family transcriptional regulator, partial                     |
| M5005_Spy_1787  | <a href="#">3571113</a> | NE | Spy49_1740  | <a href="#">6985425</a> | NE | -                | - |          |         | glyoxalase                                                         |
| M5005_Spy_1788  | <a href="#">3571114</a> | NE | Spy49_1742  | <a href="#">6985426</a> | NE | yaaA             | * |          |         | hypothetical protein M5005_Spy_1788                                |
| M5005_Spy_1789c | <a href="#">3571115</a> | NE | Spy49_1743c | <a href="#">6985427</a> | NC | rdgG             | * |          |         | anaerobic ribonucleoside-triphosphate reductase activating protein |
| M5005_Spy_1790c | <a href="#">3571077</a> | NE | Spy49_1744c | <a href="#">6985428</a> | NE | -                | - |          |         | acetyltransferase                                                  |
| M5005_Spy_1791c | <a href="#">3571078</a> | NC | Spy49_1745c | <a href="#">6985429</a> | E  | -                | * |          |         | virulence factor                                                   |
| M5005_Spy_1792c | <a href="#">3571079</a> | NC | Spy49_1746c | <a href="#">6985430</a> | NC | -                | - |          |         | hypothetical protein M5005_Spy_1792                                |
| M5005_Spy_1793c | <a href="#">3571080</a> | C  | Spy49_1747c | <a href="#">6985431</a> | NC | rdrD             | * |          |         | anaerobic ribonucleoside triphosphate reductase                    |
| M5005_Spy_1794c | <a href="#">3571081</a> | NE | Spy49_1748c | <a href="#">6985432</a> | NE | -                | - |          |         | hypothetical protein M5005_Spy_1794                                |
| M5005_Spy_1795c | <a href="#">3571082</a> | NE | Spy49_1749c | <a href="#">6985433</a> | NE | -                | * |          |         | hypothetical protein M5005_Spy_1795                                |
| M5005_Spy_1796c | <a href="#">3571083</a> | E  | Spy49_1750c | <a href="#">6985434</a> | NC | -                | - | SSA_2240 |         | Holliday junction resolvase-like protein                           |
| M5005_Spy_1797c | <a href="#">3571084</a> | NE | Spy49_1751c | <a href="#">6985435</a> | NE | -                | - |          |         | hypothetical protein M5005_Spy_1797                                |
| M5005_Spy_1798c | <a href="#">3571085</a> | C  | Spy49_1752c | <a href="#">6985436</a> | NE | spxA             | * |          | SP_1405 | Spx family transcriptional regulator                               |
| M5005_Spy_1799c | <a href="#">3571086</a> | NE | Spy49_1753c | <a href="#">6985437</a> | NC | recA             | * |          |         | recombinase A                                                      |
| M5005_Spy_1800c | <a href="#">3571087</a> | NE | Spy49_1754c | <a href="#">6985438</a> | NE | cinA             | * |          |         | competence damage-inducible protein A                              |
| M5005_Spy_1801c | <a href="#">3571088</a> | NC | Spy49_1755c | <a href="#">6985439</a> | NE | tag              | * |          |         | DNA-3-methyladenine glycosylase                                    |
| M5005_Spy_1802c | <a href="#">3571089</a> | NC | Spy49_1756c | <a href="#">6985440</a> | C  | ruvA             | * |          | SP_0179 | Holliday junction DNA helicase RuvA                                |
| M5005_Spy_1803c | <a href="#">3571090</a> | NE | Spy49_1757c | <a href="#">6985441</a> | C  | lmrP             | * |          |         | multidrug resistance protein B                                     |
| M5005_Spy_1804c | <a href="#">3571091</a> | NC | Spy49_1758c | <a href="#">6985442</a> | C  | mutL             | * |          |         | DNA mismatch repair protein                                        |
| M5005_Spy_1805c | <a href="#">3571092</a> | NC | Spy49_1759c | <a href="#">6985443</a> | NC | mutS             | * |          |         | DNA mismatch repair protein MutS                                   |
| M5005_Spy_1806c | <a href="#">3571093</a> | NE | -           | -                       | -  | -                | - |          |         | hypothetical protein M5005_Spy_1806                                |
| M5005_Spy_1807c | <a href="#">3571094</a> | NE | Spy49_1761c | <a href="#">6985444</a> | NE | argR2            | * |          |         | arginine repressor ArgR                                            |
| M5005_Spy_1808  | <a href="#">3571095</a> | E  | Spy49_1762  | <a href="#">6985445</a> | E  | <b>argS</b>      | * | SSA_2262 | SP_2078 | arginyl-tRNA synthetase                                            |
| M5005_Spy_1809  | <a href="#">3571096</a> | NE | Spy49_1763  | <a href="#">6985446</a> | NE | uvrB             | * |          |         | bacteriocin                                                        |
| M5005_Spy_1810c | <a href="#">3571058</a> | NE | Spy49_1764c | <a href="#">6985447</a> | NE | -                | - |          |         | hypothetical protein M5005_Spy_1810                                |
| M5005_Spy_1811c | <a href="#">3571059</a> | NE | Spy49_1765c | <a href="#">6985448</a> | NE | -                | * |          |         | hypothetical protein M5005_Spy_1811                                |
| M5005_Spy_1812c | <a href="#">3571060</a> | NE | Spy49_1767c | <a href="#">6985449</a> | NE | -                | * |          |         | hypothetical protein M5005_Spy_1812                                |
| M5005_Spy_1813c | <a href="#">3571061</a> | E  | Spy49_1768c | <a href="#">6985450</a> | E  | <b>aspS</b>      | * |          | SP_2114 | aspartyl-tRNA synthetase                                           |
| M5005_Spy_1814c | <a href="#">3571062</a> | E  | Spy49_1769c | <a href="#">6985451</a> | E  | <b>hisS</b>      | * | SSA_2284 | SP_2121 | histidyl-tRNA synthetase                                           |
| M5005_Spy_1815  | <a href="#">3571063</a> | NE | Spy49_1770  | <a href="#">6985452</a> | NE | rpmF             | * |          |         | 50S ribosomal protein L32                                          |
| M5005_Spy_1816  | <a href="#">3571064</a> | NC | Spy49_1771  | <a href="#">6985453</a> | NC | rpmG             | * |          |         | 50S ribosomal protein L33                                          |
| M5005_Spy_1817  | <a href="#">3571065</a> | NE | Spy49_1772c | <a href="#">6985454</a> | NE | -                | - |          |         |                                                                    |
| M5005_Spy_1818  | <a href="#">3571066</a> | NE | Spy49_1773  | <a href="#">6985455</a> | NE | cadD             | * |          |         | cadmium resistance protein                                         |
| M5005_Spy_1819  | <a href="#">3571067</a> | NE | Spy49_1774  | <a href="#">6985456</a> | NE | cadC             | * |          |         | cadmium efflux system accessory protein                            |
| M5005_Spy_1820  | <a href="#">3571068</a> | NE | Spy49_1775  | <a href="#">6985457</a> | NE | -                | - |          |         | hypothetical protein M5005_Spy_1819                                |
| M5005_Spy_1821  | <a href="#">3571069</a> | NE | Spy49_1777  | <a href="#">6985458</a> | NE | -                | * |          |         | DNA translocase FtsK                                               |
| M5005_Spy_1822c | <a href="#">3571070</a> | NE | Spy49_1778  | <a href="#">6985459</a> | NE | -                | * |          |         | hypothetical protein M5005_Spy_1821                                |
| M5005_Spy_1823  | <a href="#">3571071</a> | NE | Spy49_1779  | <a href="#">6985460</a> | NE | -                | * |          |         | transcriptional regulator                                          |
| M5005_Spy_1824c | <a href="#">3571072</a> | NE | Spy49_1780c | <a href="#">6985461</a> | NE | -                | * |          |         | hypothetical protein M5005_Spy_1823                                |
| M5005_Spy_1825  | <a href="#">3571073</a> | NE | Spy49_1781  | <a href="#">6985462</a> | NE | -                | * |          |         | phosphohydrolase                                                   |
| M5005_Spy_1826  | <a href="#">3571074</a> | NE | Spy49_1782  | <a href="#">6986105</a> | NE | -                | * |          |         | PadR family transcriptional regulator                              |
| M5005_Spy_1827  | <a href="#">3571075</a> | NE | Spy49_1783  | <a href="#">6986106</a> | NE | -                | * |          |         | hypothetical protein M5005_Spy_1826                                |
| M5005_Spy_1828c | <a href="#">3571076</a> | NE | Spy49_1784c | <a href="#">6986107</a> | NC | -                | * |          |         | hypothetical protein M5005_Spy_1827                                |
| M5005_Spy_1830  | <a href="#">3571039</a> | NE | Spy49_1785  | <a href="#">6986108</a> | NE | -                | * |          |         | phage infection protein                                            |
| M5005_Spy_1831c | <a href="#">3571040</a> | E  | Spy49_1786c | <a href="#">6986109</a> | E  | <b>rpsD</b>      | * | SSA_2350 | SP_0085 | TetR family transcriptional regulator                              |
| M5005_Spy_1832c | <a href="#">3571041</a> | NC | -           | -                       | -  | -                | - |          |         | 30S ribosomal protein S4                                           |
| M5005_Spy_1833c | <a href="#">3571042</a> | NE | -           | -                       | -  | -                | - |          |         | hypothetical protein M5005_Spy_1832                                |
| M5005_Spy_1834c | <a href="#">3571043</a> | NE | Spy49_1787c | <a href="#">6986110</a> | NE | -                | * |          |         | transposase                                                        |
| M5005_Spy_1835c | <a href="#">3571044</a> | E  | Spy49_1788c | <a href="#">6986111</a> | E  | <b>holB/dnaC</b> | * | SSA_2356 | SP_2203 | hypothetical protein M5005_Spy_1834                                |
| M5005_Spy_1836c | <a href="#">3571045</a> | NE | Spy49_1789c | <a href="#">6986112</a> | NC | rpII             | * |          |         | replicative DNA helicase                                           |
| M5005_Spy_1837c | <a href="#">3571046</a> | NE | Spy49_1790c | <a href="#">6986113</a> | E  | -                | * |          |         | 50S ribosomal protein L9                                           |
| M5005_Spy_1838c | <a href="#">3571047</a> | C  | Spy49_1791c | <a href="#">6986114</a> | E  | <b>gidA</b>      | * |          | SP_0120 | phosphoesterase, DHH family protein                                |
| M5005_Spy_1839c | <a href="#">3571048</a> | NE | Spy49_1792c | <a href="#">6986115</a> | NE | -                | - |          |         | tRNA uridine 5-carboxymethylaminomethyl modification protein GidA  |
| M5005_Spy_1840c | <a href="#">3571049</a> | E  | Spy49_1793c | <a href="#">6986116</a> | E  | <b>mnmA</b>      | * | SSA_2360 | SP_0118 | phosphorylase                                                      |
| M5005_Spy_1841  | <a href="#">3571050</a> | NE | Spy49_1794  | <a href="#">6986117</a> | NE | sdhB             | * |          |         | tRNA-specific 2-thiouridylylase MnmA                               |
| M5005_Spy_1842  | <a href="#">3571051</a> | NE | Spy49_1795  | <a href="#">6986118</a> | NE | sdhA             | * |          |         | L-serine dehydratase                                               |
| M5005_Spy_1843c | <a href="#">3571052</a> | NE | Spy49_1796c | <a href="#">6986119</a> | NE | -                | * |          |         | L-serine dehydratase                                               |
| M5005_Spy_1844c | <a href="#">3571053</a> | C  | Spy49_1797c | <a href="#">6986120</a> | E  | -                | * |          |         | transglycosylase                                                   |
| M5005_Spy_1845c | <a href="#">3571054</a> | E  | Spy49_1798c | <a href="#">6986121</a> | E  | <b>cbiQ</b>      | * |          |         | cobalt transporter                                                 |
| M5005_Spy_1846c | <a href="#">3571055</a> | E  | Spy49_1799c | <a href="#">6986122</a> | E  | <b>cbiO</b>      | * |          |         | cobalt ABC transporter ATP-binding protein                         |
| M5005_Spy_1847c | <a href="#">3571056</a> | NC | Spy49_1800c | <a href="#">6986123</a> | E  | <b>cbiO</b>      | * |          |         | cobalt ABC transporter ATP-binding protein                         |
| M5005_Spy_1848c | <a href="#">3571057</a> | NE | Spy49_1801c | <a href="#">6986124</a> | NE | <b>pgsA</b>      | * | SSA_2368 |         | CDP-diaclyglycerol--glycerol-3-phosphate 3-phosphatidyltransferase |
| M5005_Spy_1849c | <a href="#">3571021</a> | NE | Spy49_1802c | <a href="#">6986125</a> | NE | -                | * |          |         | hypothetical protein M5005_Spy_1848                                |
| M5005_Spy_1850c | <a href="#">3571022</a> | NE | Spy49_1803c | <a href="#">6986126</a> | NE | -                | * |          |         | zinc protease                                                      |
| M5005_Spy_1851  | <a href="#">3571023</a> | NE | Spy49_1804  | <a href="#">6986127</a> | NE | hasA             | * |          |         | zinc protease                                                      |
| M5005_Spy_1852  | <a href="#">3571024</a> | NE | Spy49_1806  | <a href="#">6986128</a> | NE | hasB             | * |          |         | hyaluronan synthase                                                |
| M5005_Spy_1853  | <a href="#">3571025</a> | NE | Spy49_1808  | <a href="#">6986129</a> | NE | hasC             | * |          |         | UDP-glucose 6-dehydrogenase                                        |
| M5005_Spy_1854  | <a href="#">3571026</a> | NE | Spy49_1809  | <a href="#">6986130</a> | NE | -                | * |          |         | UTP-glucose-1-phosphate uridylyltransferase                        |
| M5005_Spy_1855  | <a href="#">3571027</a> | NE | Spy49_1810  | <a href="#">6986131</a> | NE | recF             | * |          |         | hypothetical protein M5005_Spy_1854                                |
| M5005_Spy_1856c | <a href="#">3571028</a> | NE | Spy49_1811c | <a href="#">6986132</a> | NE | -                | * |          |         | recombination protein F                                            |
| M5005_Spy_1857c | <a href="#">3571029</a> | NE | Spy49_1812c | <a href="#">6986133</a> | NE | guaB             | * |          |         | glucose uptake protein                                             |
| M5005_Spy_1858c | <a href="#">3571030</a> | E  | Spy49_1813c | <a href="#">6986134</a> | E  | <b>trsA</b>      | * | SSA_2375 | SP_2229 | inosine 5'-monophosphate dehydrogenase                             |
| M5005_Spy_1859c | <a href="#">3571031</a> | NC | -           | -                       | -  | -                | - |          |         | tryptophanyl-tRNA synthetase                                       |
| M5005_Spy_1860  | <a href="#">3571032</a> | NE | Spy49_1814  | <a href="#">6986135</a> | NE | -                | * |          |         | hypothetical protein M5005_Spy_1859                                |
| M5005_Spy_1861  | <a href="#">3571033</a> | NE | Spy49_1815  | <a href="#">6986136</a> | NE | -                | * |          |         | hypothetical protein M5005_Spy_1860                                |
| M5005_Spy_1862  | <a href="#">3571034</a> | NE | Spy49_1817  | <a href="#">6986137</a> | NE | -                | * |          |         | ABC transporter ATP-binding protein                                |
| M5005_Spy_1863c | <a href="#">3571037</a> | NE | -           | -                       | -  | -                | - |          |         | ABC transporter permease                                           |
| M5005_Spy_1864c | <a href="#">3571018</a> | NE | Spy49_1820c | <a href="#">6986141</a> | NE | -                | * |          |         | transposase                                                        |
| M5005_Spy_1865  | <a href="#">3571019</a> | C  | Spy49_1821  | <a href="#">6986142</a> | E  | <b>htrA</b>      | * |          |         | rRNA large subunit methyltransferase                               |
| M5005_Spy_1866  | <a href="#">3571020</a> | NE | Spy49_1822  | <a href="#">6986143</a> | NE | parB             | * |          |         | protease Do                                                        |
|                 |                         |    |             |                         |    |                  |   |          |         | chromosome partitioning protein                                    |

**Table S8. Bacterial strains and plasmids.**

| Strains and plasmids              | Description                                                                                        | Reference our source            |
|-----------------------------------|----------------------------------------------------------------------------------------------------|---------------------------------|
| <b><i>E. coli</i> strains</b>     |                                                                                                    |                                 |
| DH5 $\alpha$                      | <i>hsdR17 recA1 gyrA endA1 relA1</i>                                                               | Hanahan and Meselson, 1983      |
| C43[DE3]                          | F <sup>-</sup> <i>ompT gal dcm hsdS<sub>B</sub>(r<sub>B</sub><sup>-</sup> m<sub>B</sub>)</i> (DE3) | Miroux and Walker, 1996         |
| <b><i>S. pyogenes</i> strains</b> |                                                                                                    |                                 |
| 5448                              | M1T1                                                                                               | Chatellier <i>et al.</i> , 2000 |
| NZ131                             | M49                                                                                                | Simon and Ferretti, 1991        |
| 5448. <i>vicR</i> <sub>ind</sub>  | 5448, theophylline-inducible expression of <i>vicR</i> ; Sp <sup>R</sup>                           | This study                      |
| 5448. <i>murE</i> <sub>ind</sub>  | 5448, theophylline-inducible expression of <i>murE</i> Sp <sup>R</sup>                             | This study                      |
| NZ131. <i>vicR</i> <sub>ind</sub> | NZ131, theophylline-inducible expression of <i>vicR</i> ; Sp <sup>R</sup>                          | This study                      |
| NZ131. <i>murE</i> <sub>ind</sub> | NZ131, theophylline-inducible expression of <i>murE</i> ; Sp <sup>R</sup>                          | This study                      |
| <b>Plasmids</b>                   |                                                                                                    |                                 |
| pOSKAR                            | <i>Oskar</i> -delivery plasmid; Sp <sup>R</sup> , Km <sup>R</sup>                                  | Le Breton <i>et al.</i> , 2013  |
| pKRMIT                            | <i>Krmit</i> -delivery plasmid; Sp <sup>R</sup> , Km <sup>R</sup>                                  | This study                      |
| pCRS                              | Temperature-sensitive conditional vector; Sp <sup>R</sup>                                          | Le Breton <i>et al.</i> 2013    |
| pSinS                             | Suicide plasmid for stable insertional inactivation; Sp <sup>R</sup>                               | This study                      |
| pCRK                              | Temperature-sensitive conditional vector; Km <sup>R</sup>                                          | Le Breton <i>et al.</i> 2013    |
| pHlpK                             | Temperature-sensitive conditional helper vector; Km <sup>R</sup>                                   | This study                      |
| pEU7742-E                         | Plasmid containing the fusion of the <i>Psag</i> promoter with the synthetic riboswitch E          | Topp <i>et al.</i> , 2010       |
| pSinMurE                          | Suicid plasmid for mutagenesis and conditional expression control of <i>murE</i>                   | This study                      |
| pSinVicR                          | Suicid plasmid for mutagenesis and conditional expression control of <i>vicR</i>                   | This study                      |

**Table S9. Primers used in this study.**

| Name and main purpose                                             | Sequence (5' - 3')                                  | Restriction site(s)/Barcode | Target           | Role                                                                               |
|-------------------------------------------------------------------|-----------------------------------------------------|-----------------------------|------------------|------------------------------------------------------------------------------------|
| <b>Construction of the <i>Krmit</i> transposon</b>                |                                                     |                             |                  |                                                                                    |
| oKrmIt1                                                           | cccCTGCAGTAACAGGTTGGATGATAAGTCCCCGGTCTG             | <i>Pst</i> / <i>Mme</i> I   | pOSKAR           | <i>Mme</i> I modification of <i>Oskar</i> to create <i>Krmit</i>                   |
| <b>Production of <i>Krmit</i> insertion tags</b>                  |                                                     |                             |                  |                                                                                    |
| Adapterbarcode501A                                                | TTCCCTACACGACGCTCTCCGATCTTATAGCCTNN                 | Adapter501                  |                  | <i>Mme</i> I Tnseq adapter                                                         |
| Adapterbarcode501B                                                | AGGCTATAAGATCGGAAGAGCGTCGTGTAGGGAAAGAG              | Adapter501                  |                  | <i>Mme</i> I Tnseq adapter                                                         |
| Adapterbarcode502A                                                | TTCCCTACACGACGCTCTCCGATCTATAGAGCINN                 | Adapter502                  |                  | <i>Mme</i> I Tnseq adapter                                                         |
| Adapterbarcode502B                                                | GCCTCTATAGATCGGAAGAGCGTCGTGTAGGGAAAGAG              | Adapter502                  |                  | <i>Mme</i> I Tnseq adapter                                                         |
| Adapterbarcode503A                                                | TTCCCTACACGACGCTCTCCGATCTCCTATCCTNN                 | Adapter503                  |                  | <i>Mme</i> I Tnseq adapter                                                         |
| Adapterbarcode503B                                                | AGGATAGGAGATCGGAAGAGCGTCGTGTAGGGAAAGAG              | Adapter503                  |                  | <i>Mme</i> I Tnseq adapter                                                         |
| Adapterbarcode504A                                                | TTCCCTACACGACGCTCTCCGATCTGGCTCTGANN                 | Adapter504                  |                  | <i>Mme</i> I Tnseq adapter                                                         |
| Adapterbarcode504B                                                | TCAGAGCCAGATCGGAAGAGCGTCGTGTAGGGAAAGAG              | Adapter504                  |                  | <i>Mme</i> I Tnseq adapter                                                         |
| Adapterbarcode505A                                                | TTCCCTACACGACGCTCTCCGATCTAGGCGAAGNN                 | Adapter505                  |                  | <i>Mme</i> I Tnseq adapter                                                         |
| Adapterbarcode505B                                                | CTTCGCCTAGATCGGAAGAGCGTCGTGTAGGGAAAGAG              | Adapter505                  |                  | <i>Mme</i> I Tnseq adapter                                                         |
| Adapterbarcode506A                                                | TTCCCTACACGACGCTCTCCGATCTTAATCTTANN                 | Adapter506                  |                  | <i>Mme</i> I Tnseq adapter                                                         |
| Adapterbarcode506B                                                | TAAGATTAAGATCGGAAGAGCGTCGTGTAGGGAAAGAG              | Adapter506                  |                  | <i>Mme</i> I Tnseq adapter                                                         |
| Adapterbarcode507A                                                | TTCCCTACACGACGCTCTCCGATCTCAGGACGTNN                 | Adapter507                  |                  | <i>Mme</i> I Tnseq adapter                                                         |
| Adapterbarcode507B                                                | ACGTCCTGAGATCGGAAGAGCGTCGTGTAGGGAAAGAG              | Adapter507                  |                  | <i>Mme</i> I Tnseq adapter                                                         |
| Adapterbarcode508A                                                | TTCCCTACACGACGCTCTCCGATCTGACTGACINN                 | Adapter508                  |                  | <i>Mme</i> I Tnseq adapter                                                         |
| Adapterbarcode508B                                                | GTCAGTACAGATCGGAAGAGCGTCGTGTAGGGAAAGAG              | Adapter508                  |                  | <i>Mme</i> I Tnseq adapter                                                         |
| oKrmIt-Tnseq2                                                     | CAAGCAGAAGACGGCATACGAAGCGCTACGAGGAATTTGTATCG        |                             | <i>Krmit</i>     | PCR of <i>Krmit</i> insertion tags                                                 |
| oAdapterPCR                                                       | AATGATACGGCGACCACCGAGATCACACTCTTCCCTACACGACGCTCTTCC |                             | Tnseq adapter    | PCR of <i>Krmit</i> insertion tags                                                 |
| <b>Creation of the pSinS/pHlpK system</b>                         |                                                     |                             |                  |                                                                                    |
| RepAminus1                                                        | cccAGATCTAATCATTAGGAATTGAGTCAGG                     | <i>Bgl</i> II               | pCRS             | Deletion of the <i>repAts</i> gene to create pSinS                                 |
| RepAminus2                                                        | cccAGATCTGGTTCTTGATGCTGAAACGG                       | <i>Bgl</i> II               | pCRS             | Deletion of the <i>repAts</i> gene to create pSinS                                 |
| KmR1NotI                                                          | cccGCGGCCGCGATAAACCCAGCGAACCATTGAGGTG               | <i>Not</i> I                | pCRK             | Deletion of the <i>ColE1 oriR</i> to create pHlpK                                  |
| OTS2                                                              | cccGCGGCCGCGATTAATCGCAACATCAAACAAA                  |                             | pCRK             | Deletion of the <i>ColE1 oriR</i> to create pHlpK                                  |
| <b>Theophilline-inducible <i>murE</i> and <i>vicR</i> mutants</b> |                                                     |                             |                  |                                                                                    |
| Psag-RBSWE1                                                       | cccGGATCCACGGTAAGACAGAAATCGGTC                      | <i>Bam</i> HI               | pEU7742-E        | Amplification of <i>Psag</i> -riboswitchE                                          |
| Psag-RBSWE2                                                       | CTTGTTGTTACCTCCTTAGCAGGG                            |                             | pEU7742-E        | Amplification of <i>Psag</i> -riboswitchE                                          |
| oRBSWE-V1                                                         | ACCAGCATCGTCTTGATGCC                                |                             |                  |                                                                                    |
| oMurE-1                                                           | CCCTGCTAAGGAGGTAACAACAAGATGATAACCATTGAACAATTATTAG   |                             | <i>murE</i> gene | Amplification of <i>murE</i> fragment for PCR-SOEing with <i>Psag</i> -riboswitchE |
| oMurE-2                                                           | cccGGATCCATTAGGAAAACCCCAACATCG                      | <i>Bam</i> HI               | <i>murE</i> gene | Amplification of <i>murE</i> fragment for PCR-SOEing with <i>Psag</i> -riboswitchE |
| oMurE-3                                                           | ATATCAGCTAGGCTAGCACC                                |                             | <i>murE</i> gene | Verification of correct PCR-SOEing                                                 |
| oVicR-1                                                           | CCCTGCTAAGGAGGTAACAACAAGATGAAAAAATACTTATTGTGGATG    |                             | <i>vicR</i> gene | Amplification of <i>vicR</i> fragment for PCR-SOEing with <i>Psag</i> -riboswitchE |
| oVicR-2                                                           | cccGGATCCCGCCAAAATAATCATATCCCC                      | <i>Bam</i> HI               | <i>vicR</i> gene | Amplification of <i>vicR</i> fragment for PCR-SOEing with <i>Psag</i> -riboswitchE |
| oVicR-3                                                           | CATAAGATTCATGTAGTACCC                               |                             | <i>vicR</i> gene | Verification of correct PCR-SOEing                                                 |



**Table S10. Summary of the 20 publicly available GAS genomes.**

| <b>GAS strain</b>                              | <b>Serotype</b> | <b>Size</b>      | <b>Link to genome sequence</b>                                                                                      |
|------------------------------------------------|-----------------|------------------|---------------------------------------------------------------------------------------------------------------------|
| <b><i>emm</i> Pattern A-C (Throat tropism)</b> |                 |                  |                                                                                                                     |
| <b>MGAS5005</b>                                | <b>M1T1</b>     | <b>1,838,554</b> | <b><a href="http://www.ncbi.nlm.nih.gov/nuccore/CP000017.2">http://www.ncbi.nlm.nih.gov/nuccore/CP000017.2</a></b>  |
| SF370                                          | M1              | 1,852,441        | <a href="http://www.ncbi.nlm.nih.gov/nuccore/NC_002737.1">http://www.ncbi.nlm.nih.gov/nuccore/NC_002737.1</a>       |
| A20                                            | M1              | 1,837,281        | <a href="http://www.ncbi.nlm.nih.gov/nuccore/CP003901.1">http://www.ncbi.nlm.nih.gov/nuccore/CP003901.1</a>         |
| M1-476                                         | M1              | 1,831,128        | <a href="http://www.ncbi.nlm.nih.gov/nuccore/AP012491.2">http://www.ncbi.nlm.nih.gov/nuccore/AP012491.2</a>         |
| MGAS315                                        | M3              | 1,900,521        | <a href="http://www.ncbi.nlm.nih.gov/nuccore/NC_004070.1">http://www.ncbi.nlm.nih.gov/nuccore/NC_004070.1</a>       |
| SSI-1                                          | M3              | 1,894,275        | <a href="http://www.ncbi.nlm.nih.gov/nuccore/NC_004606.1">http://www.ncbi.nlm.nih.gov/nuccore/NC_004606.1</a>       |
| Manfredo                                       | M5              | 1,841,271        | <a href="http://www.ncbi.nlm.nih.gov/nuccore/AM295007.1">http://www.ncbi.nlm.nih.gov/nuccore/AM295007.1</a>         |
| MGAS10394                                      | M6              | 1,899,877        | <a href="http://www.ncbi.nlm.nih.gov/nuccore/CP000003.1">http://www.ncbi.nlm.nih.gov/nuccore/CP000003.1</a>         |
| MGAS8232                                       | M18             | 1,895,017        | <a href="http://www.ncbi.nlm.nih.gov/nuccore/AE009949.1">http://www.ncbi.nlm.nih.gov/nuccore/AE009949.1</a>         |
| MGAS9429                                       | M12             | 1,836,467        | <a href="http://www.ncbi.nlm.nih.gov/nuccore/CP000259.1">http://www.ncbi.nlm.nih.gov/nuccore/CP000259.1</a>         |
| MGAS2096                                       | M12             | 1,860,355        | <a href="http://www.ncbi.nlm.nih.gov/nuccore/94991497">http://www.ncbi.nlm.nih.gov/nuccore/94991497</a>             |
| HKU16                                          | M12             | 1,908,100        | <a href="http://www.ncbi.nlm.nih.gov/nuccore/AFRY01000001.1">http://www.ncbi.nlm.nih.gov/nuccore/AFRY01000001.1</a> |
| HSC5                                           | M14             | 1,818,351        | <a href="http://www.ncbi.nlm.nih.gov/nuccore/NC_021807.1">http://www.ncbi.nlm.nih.gov/nuccore/NC_021807.1</a>       |
| <b><i>emm</i> pattern D (skin tropism)</b>     |                 |                  |                                                                                                                     |
| Alab49                                         | M53             | 1,827,308        | <a href="http://www.ncbi.nlm.nih.gov/nuccore/CP003068.1">http://www.ncbi.nlm.nih.gov/nuccore/CP003068.1</a>         |
| <b><i>emm</i> pattern E (generalists)</b>      |                 |                  |                                                                                                                     |
| MGAS10270                                      | M2              | 1,928,252        | <a href="http://www.ncbi.nlm.nih.gov/nuccore/NC_008022.1">http://www.ncbi.nlm.nih.gov/nuccore/NC_008022.1</a>       |
| MGAS10750                                      | M4              | 1,937,111        | <a href="http://www.ncbi.nlm.nih.gov/nuccore/CP000262.1">http://www.ncbi.nlm.nih.gov/nuccore/CP000262.1</a>         |
| MGAS6180                                       | M28             | 1,897,573        | <a href="http://www.ncbi.nlm.nih.gov/nuccore/CP000056.1">http://www.ncbi.nlm.nih.gov/nuccore/CP000056.1</a>         |
| <b>NZ131</b>                                   | <b>M49</b>      | <b>1,815,785</b> | <b><a href="http://www.ncbi.nlm.nih.gov/nuccore/CP000829.1">http://www.ncbi.nlm.nih.gov/nuccore/CP000829.1</a></b>  |
| MGAS1882                                       | M59             | 1,781,029        | <a href="http://www.ncbi.nlm.nih.gov/nuccore/NC_017053.1">http://www.ncbi.nlm.nih.gov/nuccore/NC_017053.1</a>       |
| MGAS15252                                      | M59             | 1,750,832        | <a href="http://www.ncbi.nlm.nih.gov/nuccore/CP003116.1">http://www.ncbi.nlm.nih.gov/nuccore/CP003116.1</a>         |
